# Supplementary material
Source: bioRxiv or medRxiv preprint supplement (https://www.biorxiv.org/highwire/filestream/11142/field_highwire_adjunct_files/0/041145-1.pdf)

## **TF in vitro data and genome correlations for eukaryotic species**

|                  |              |
|------------------|--------------|
| M. musculus:     | p. 2 - 117   |
| C. elegans:      | p. 118 - 139 |
| D. melanogaster: | p. 140 - 154 |
| H. sapiens:      | p. 155 - 163 |
| S. cerevisiae:   | p. 164 - 295 |

*M. musculus*

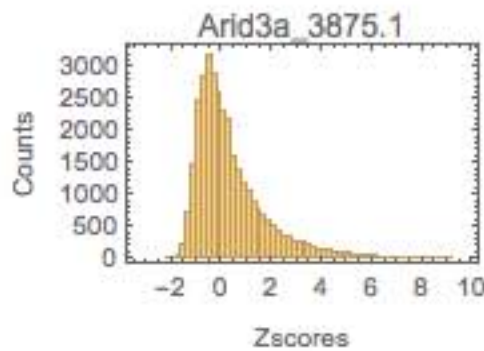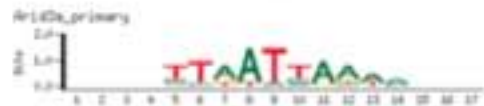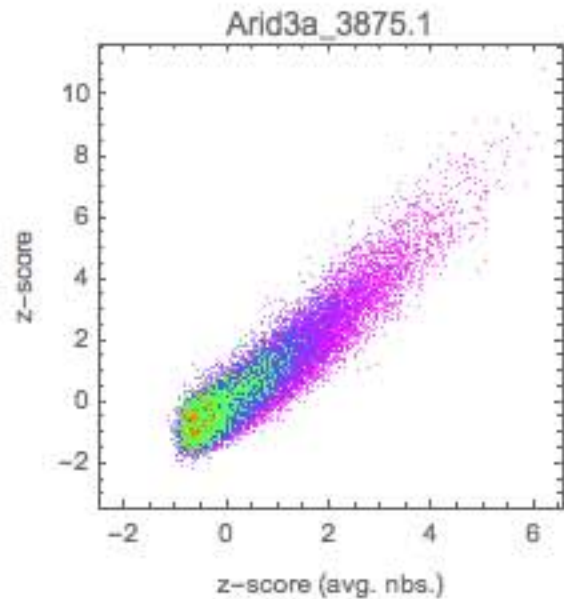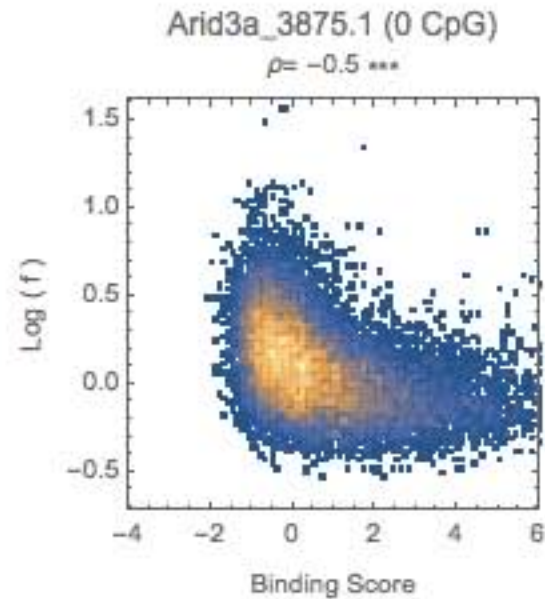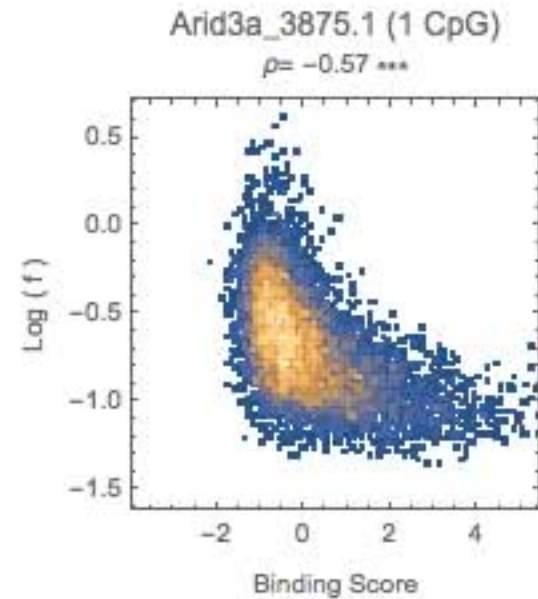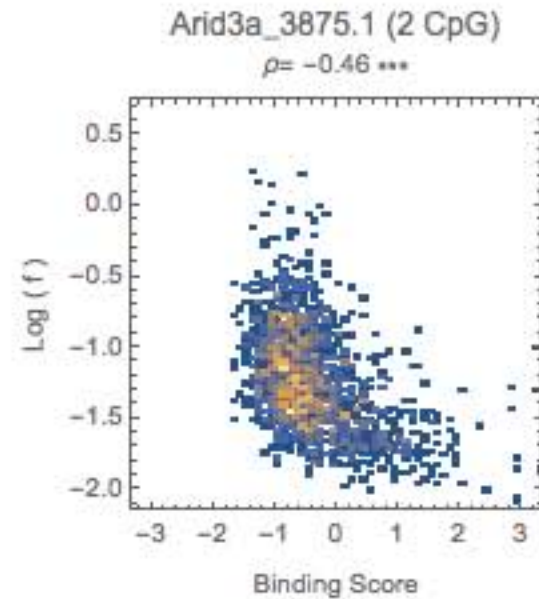

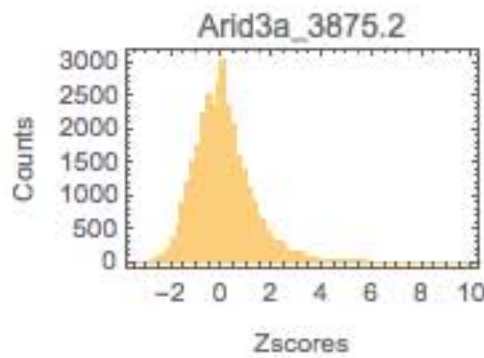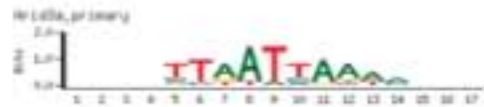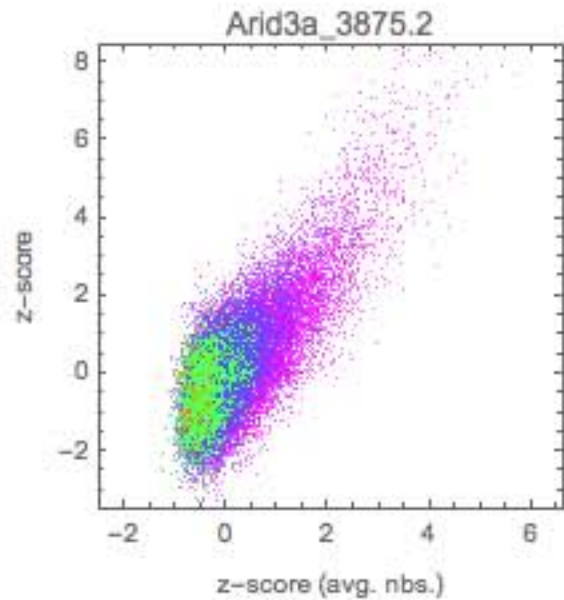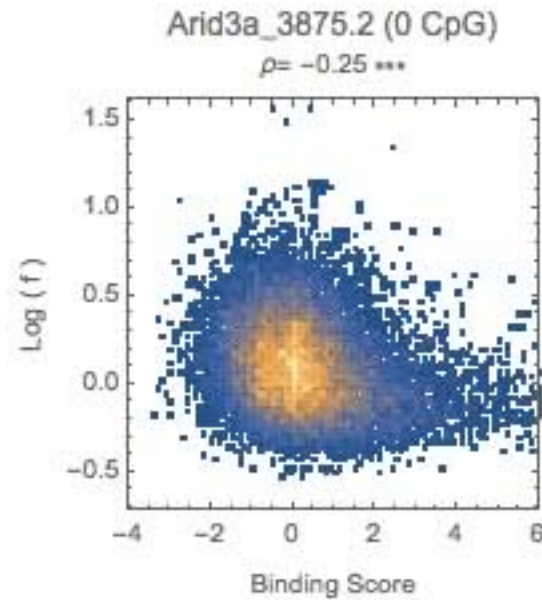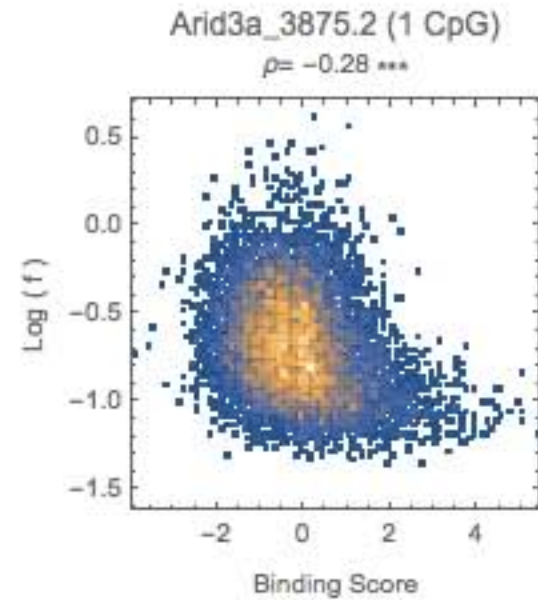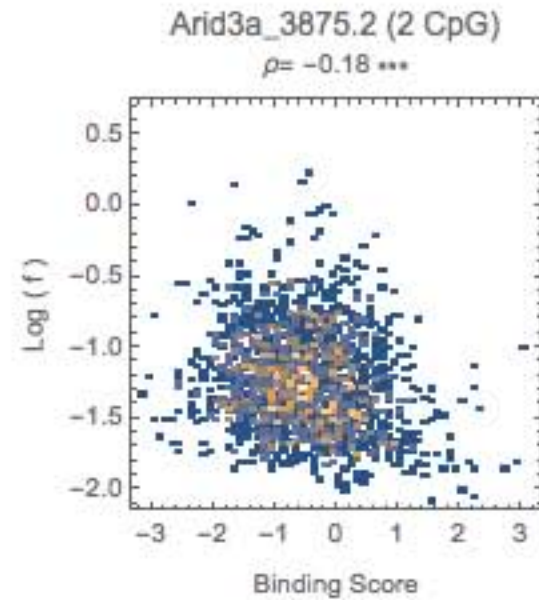



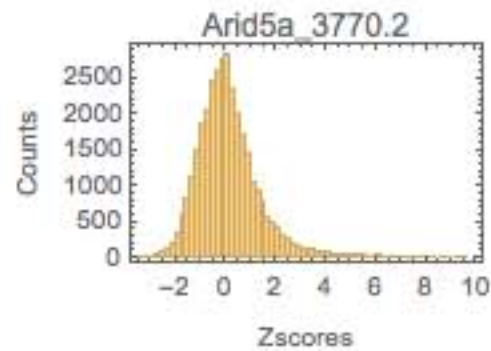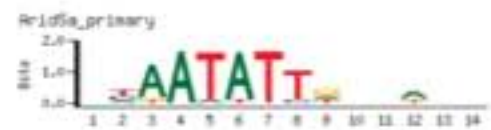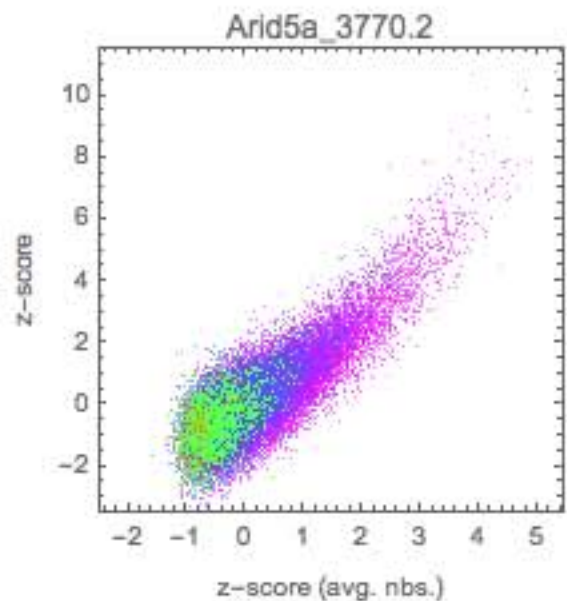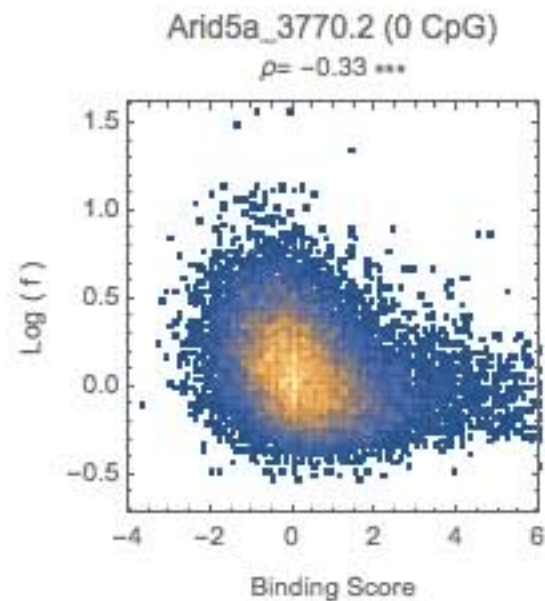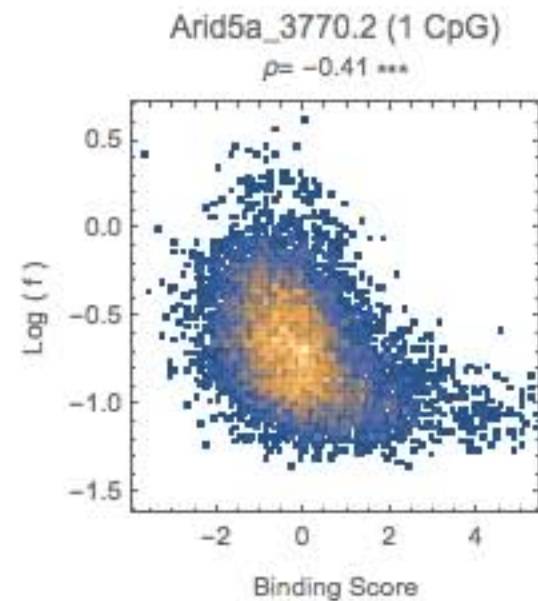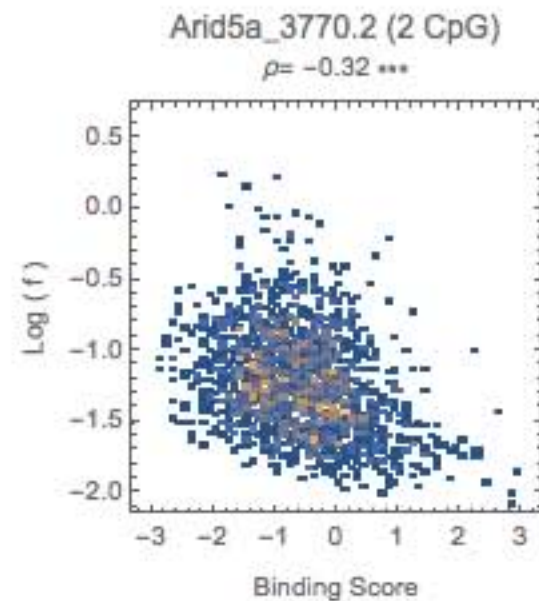

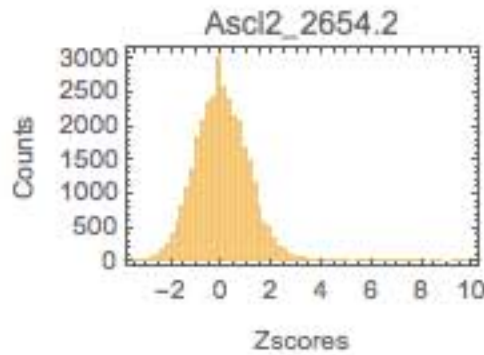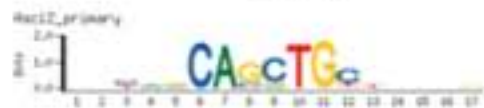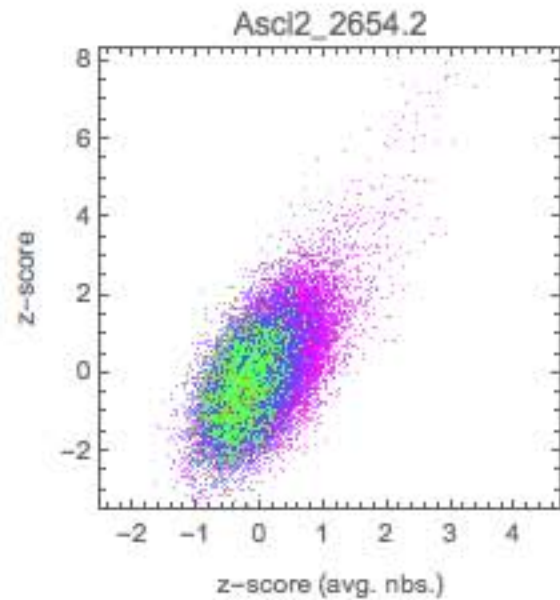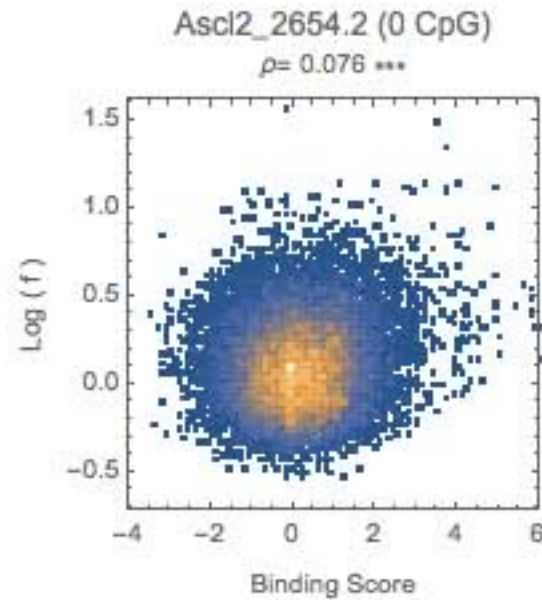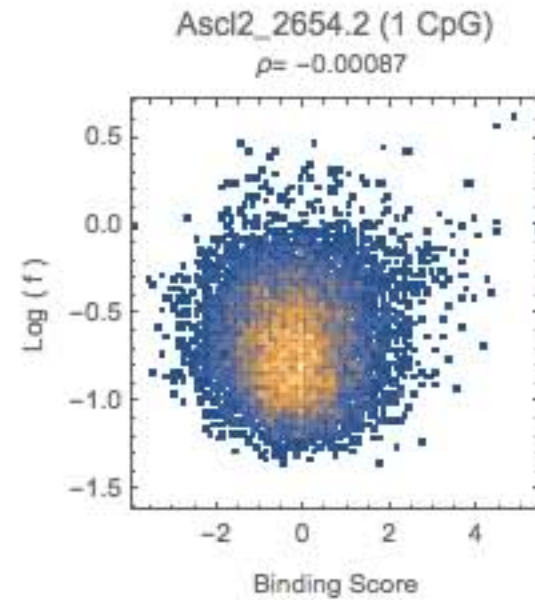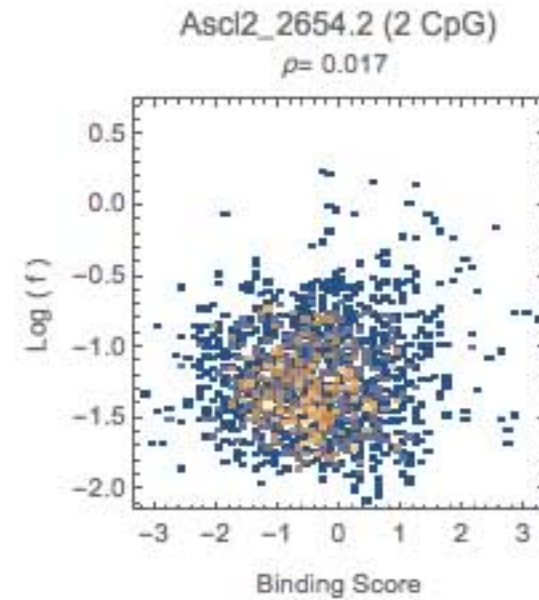

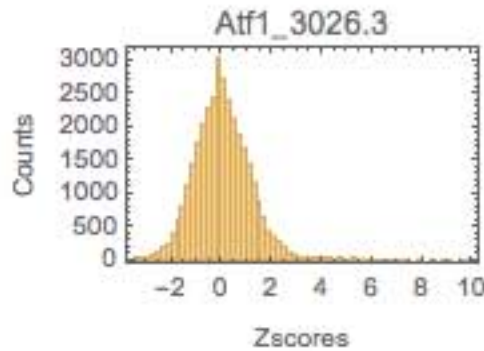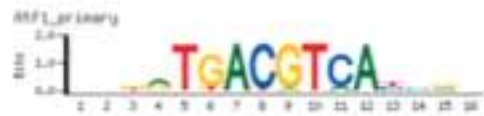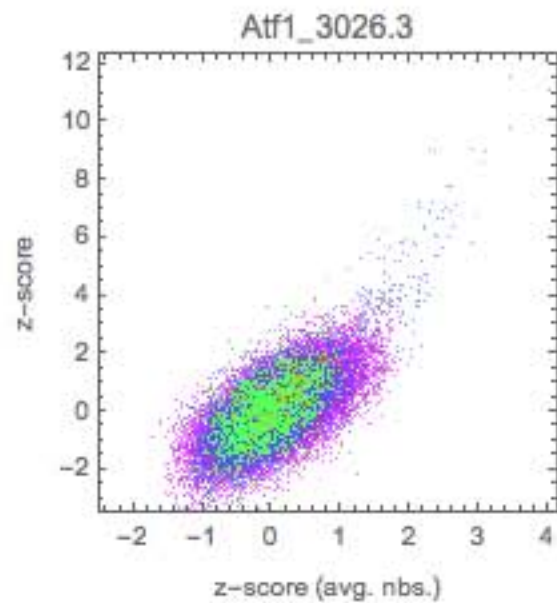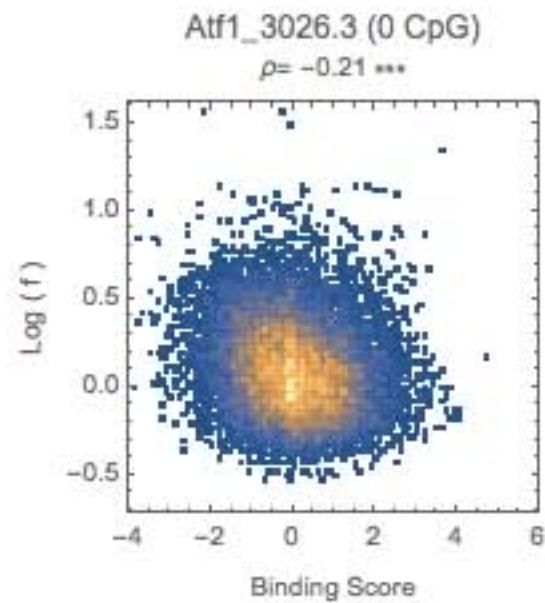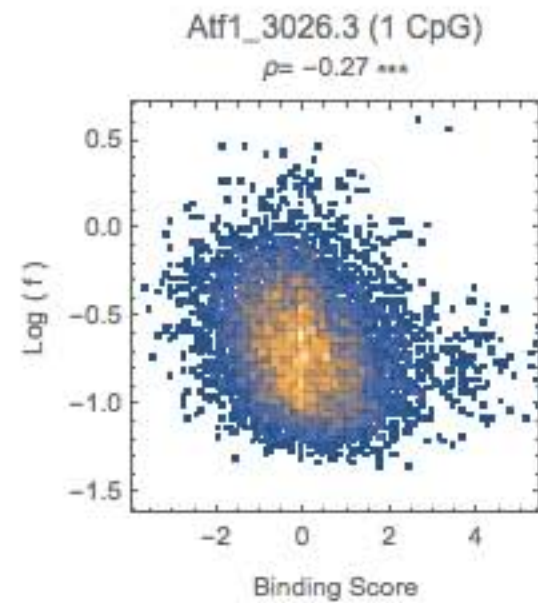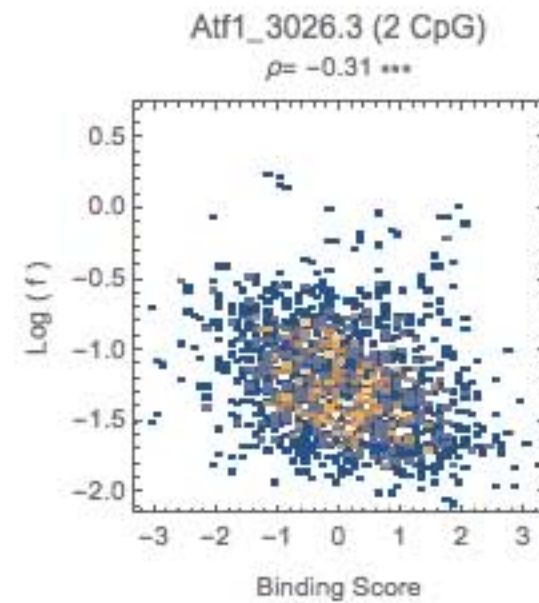

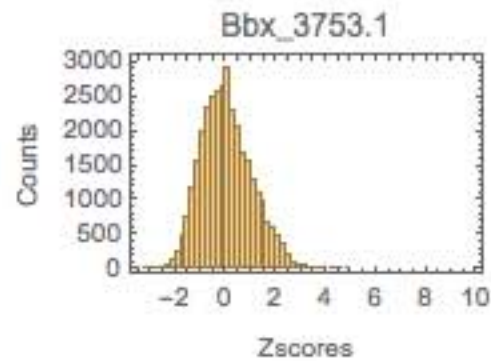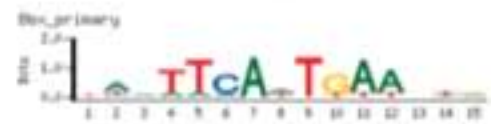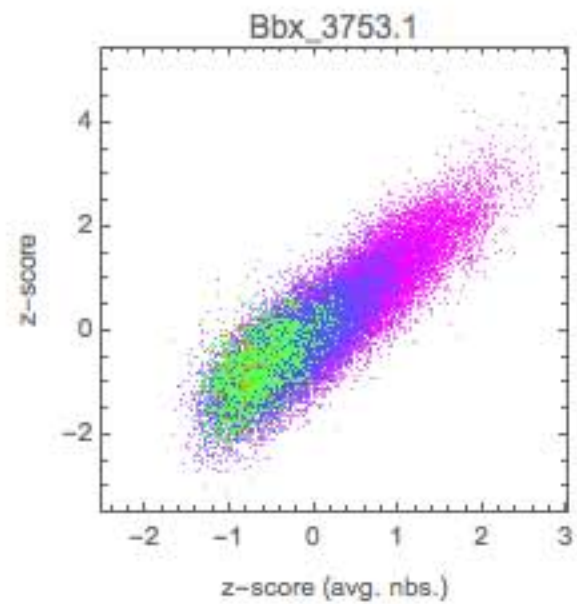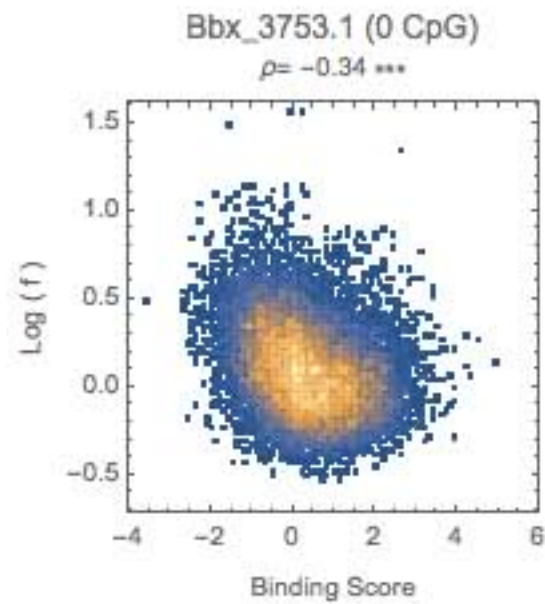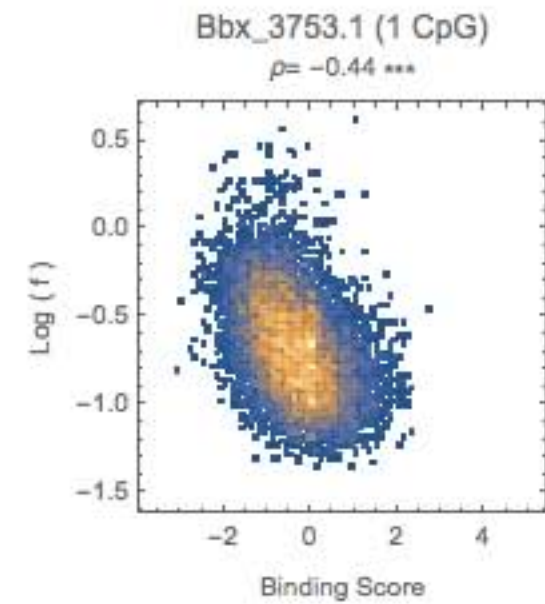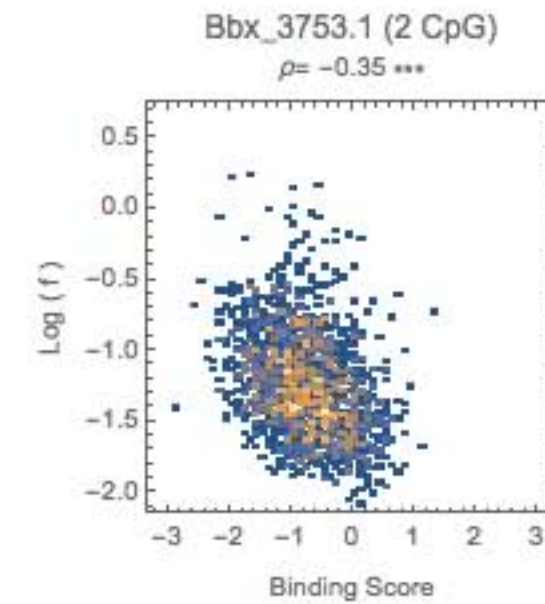



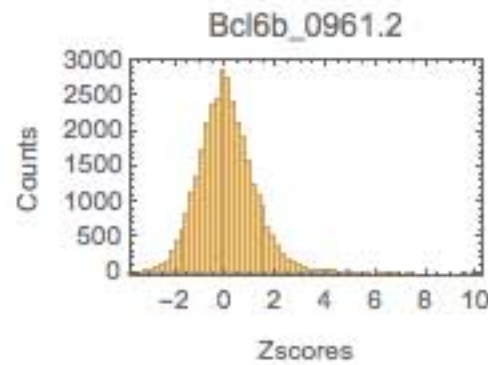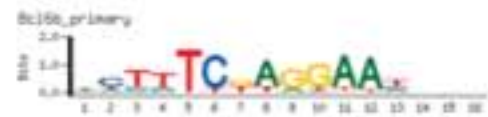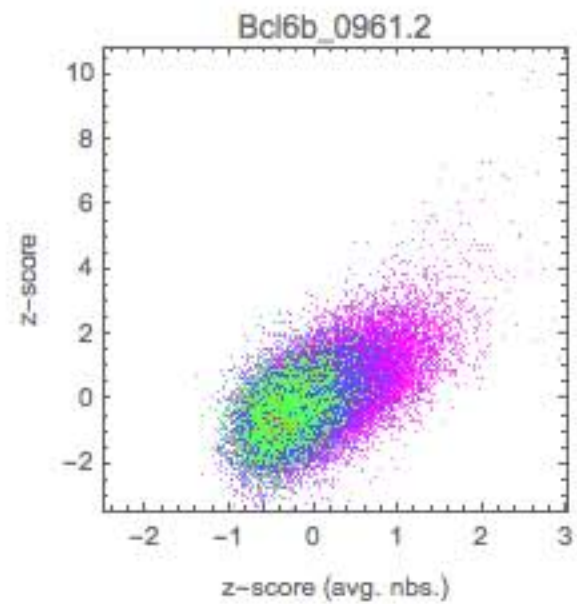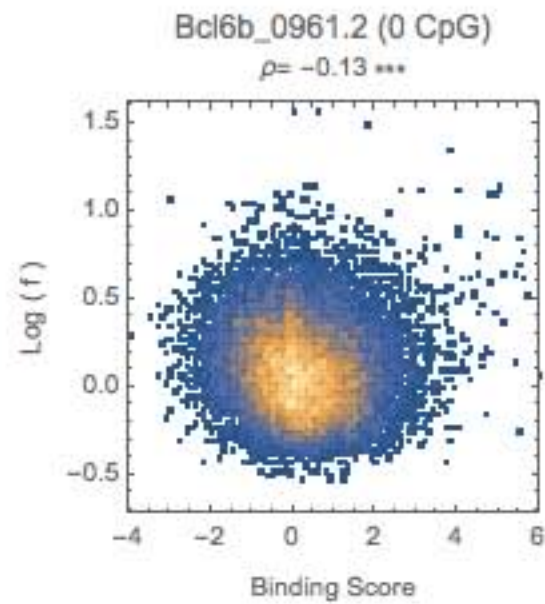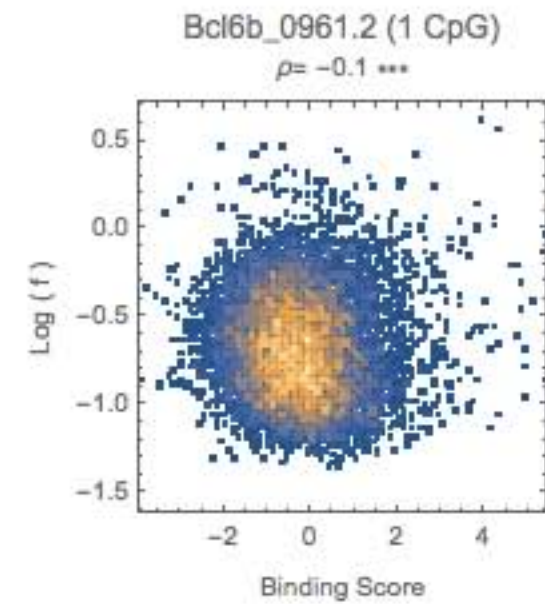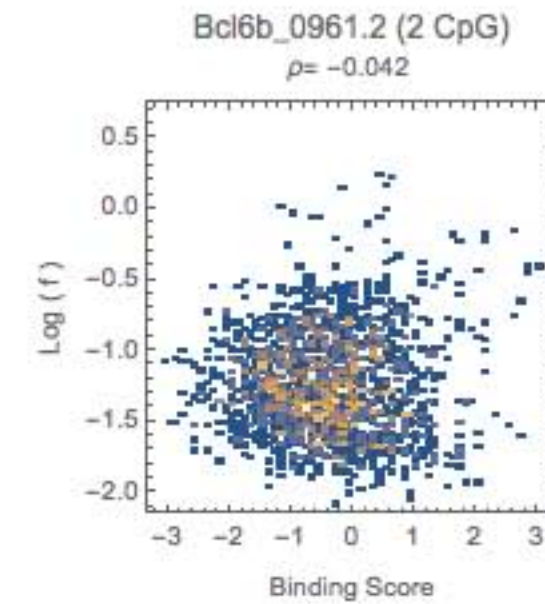

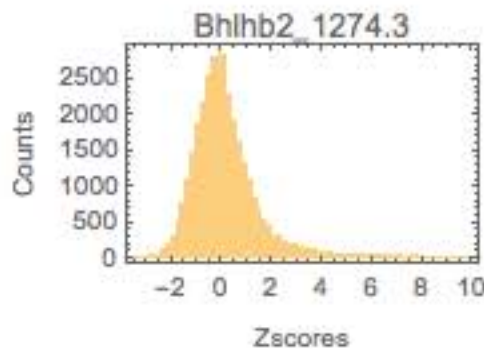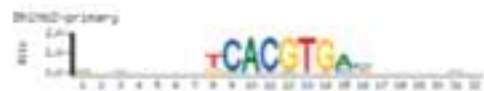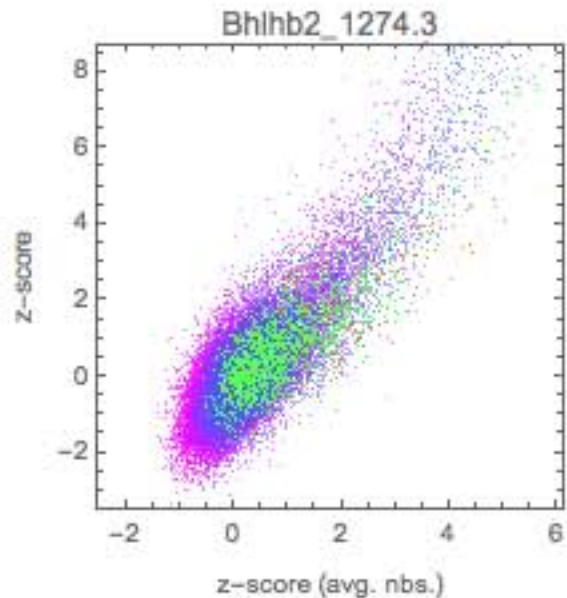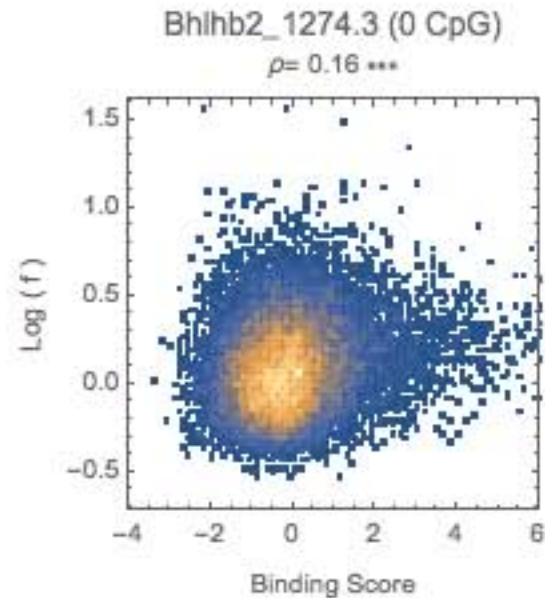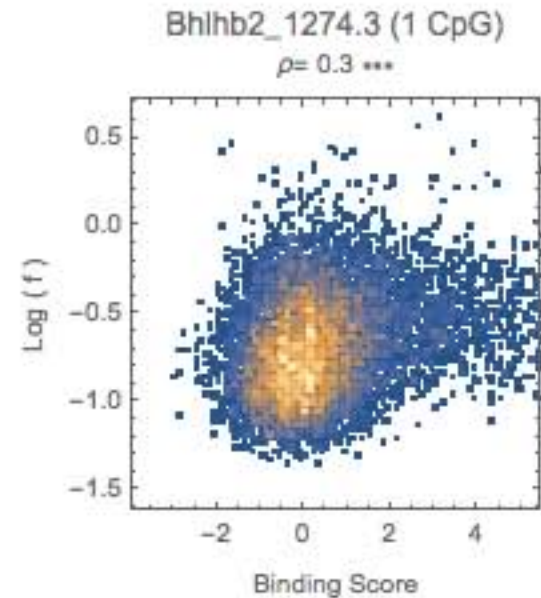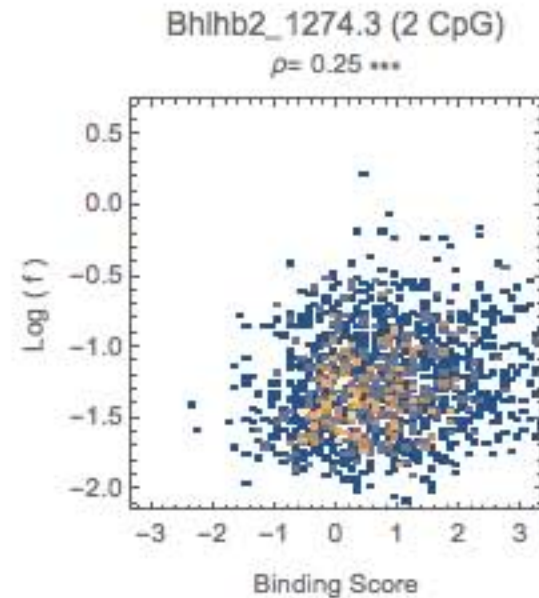

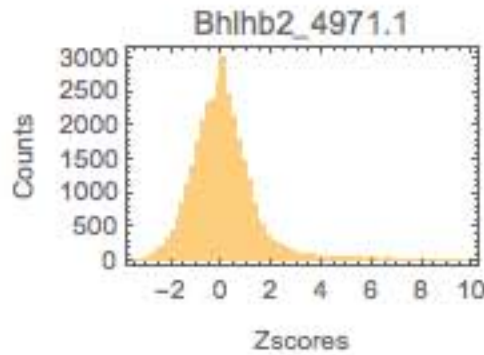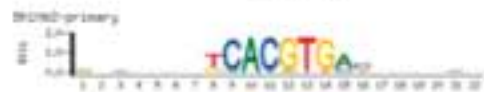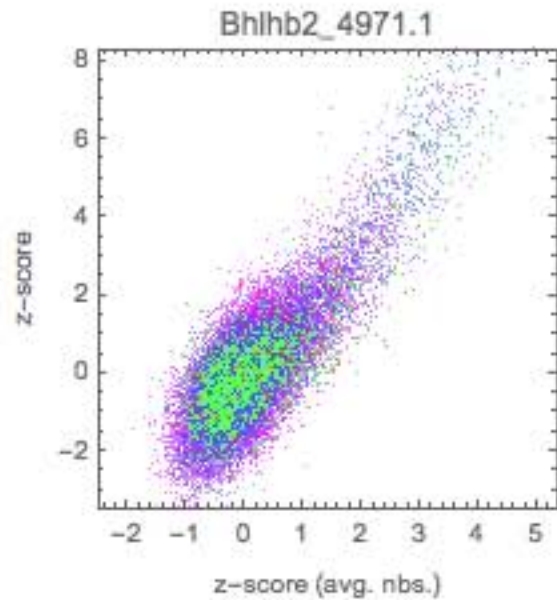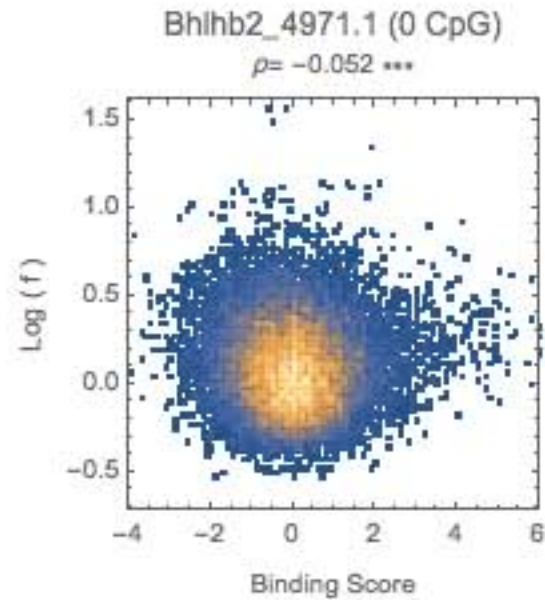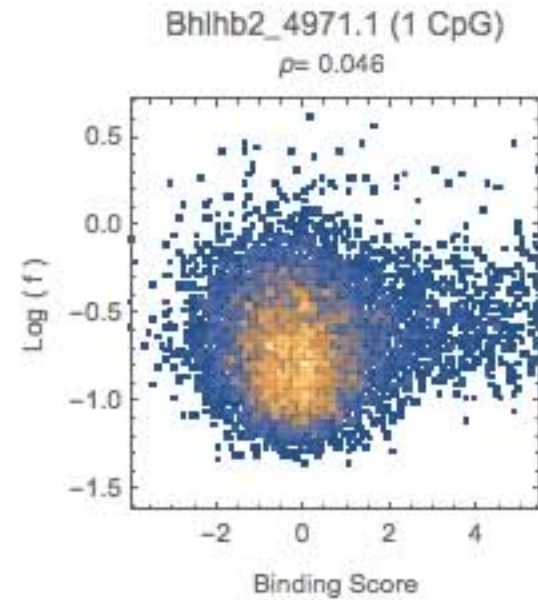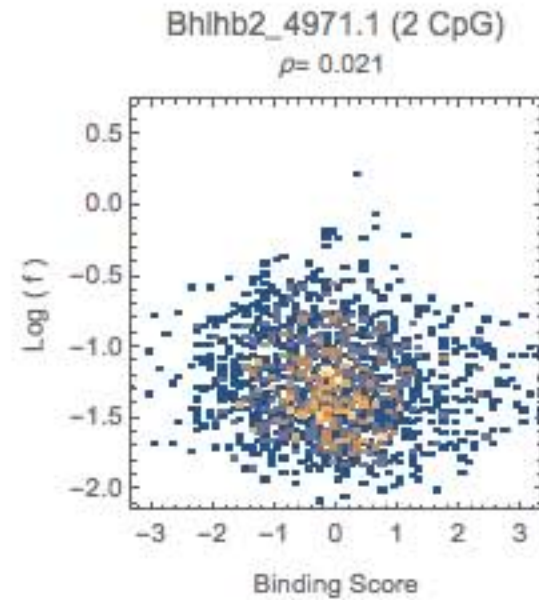



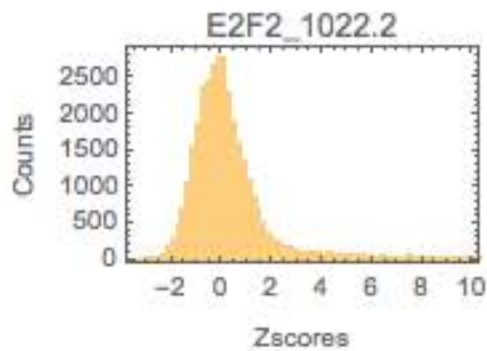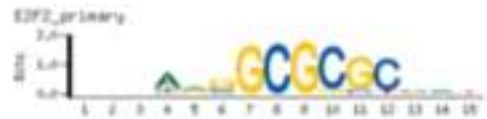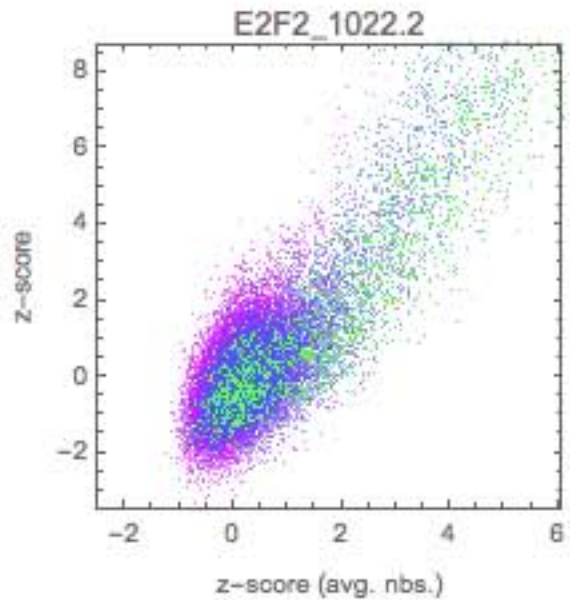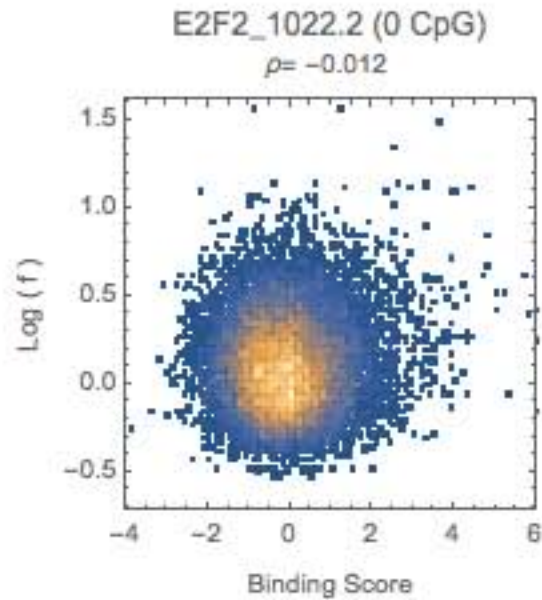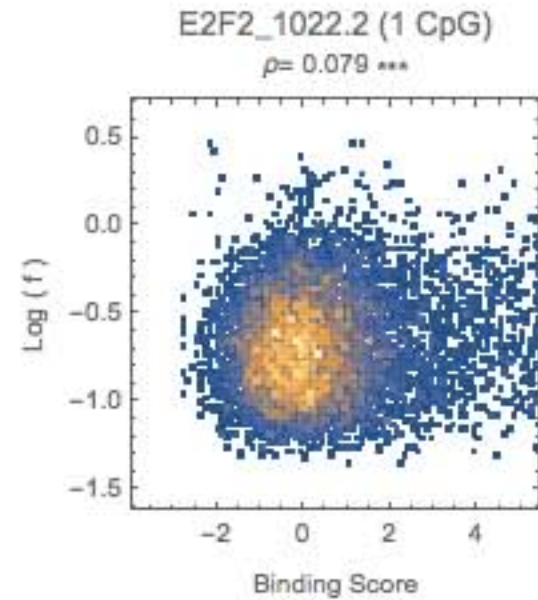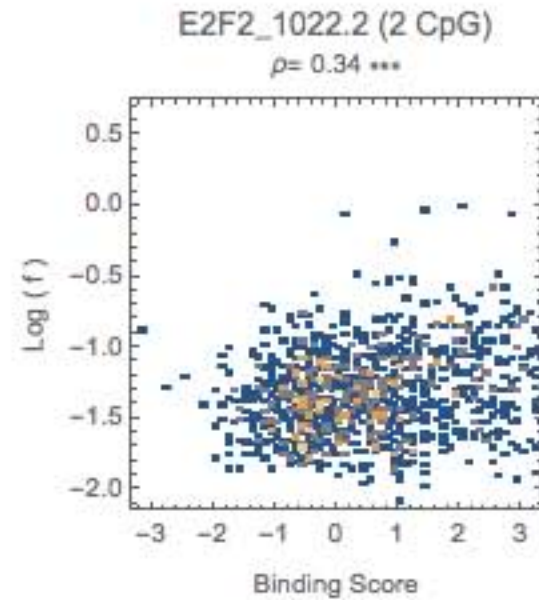



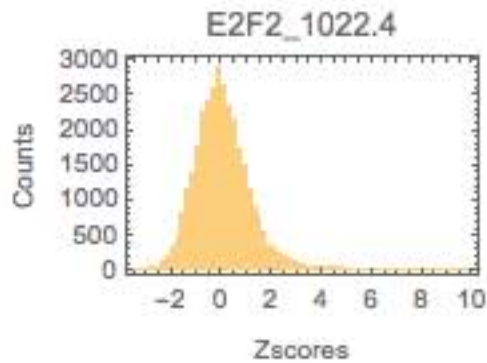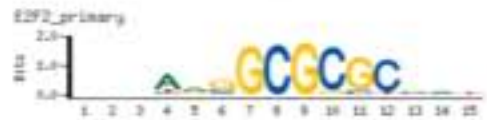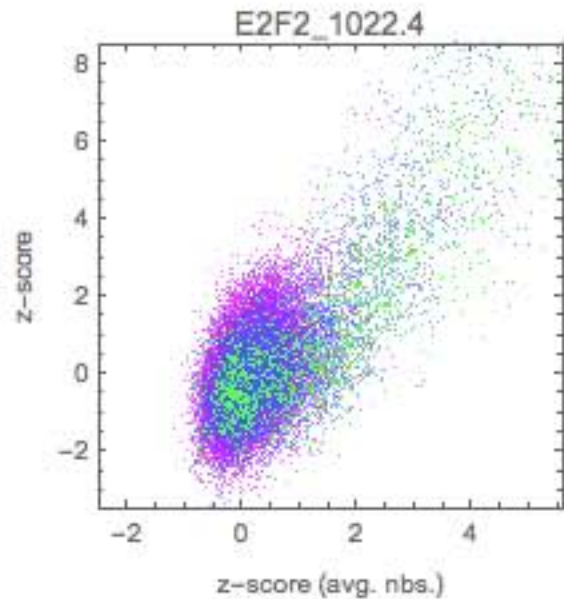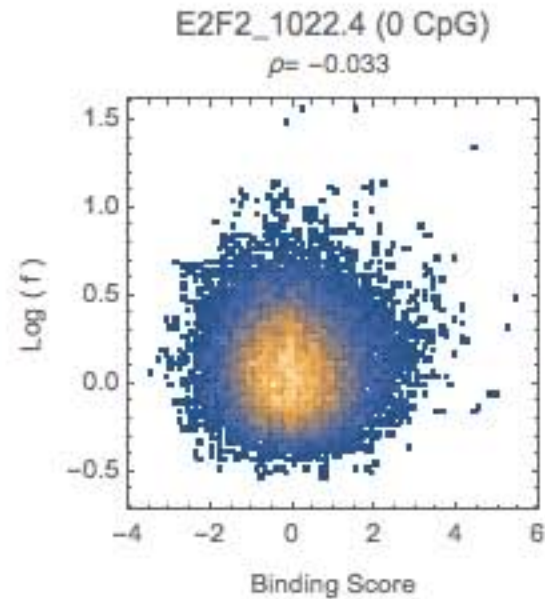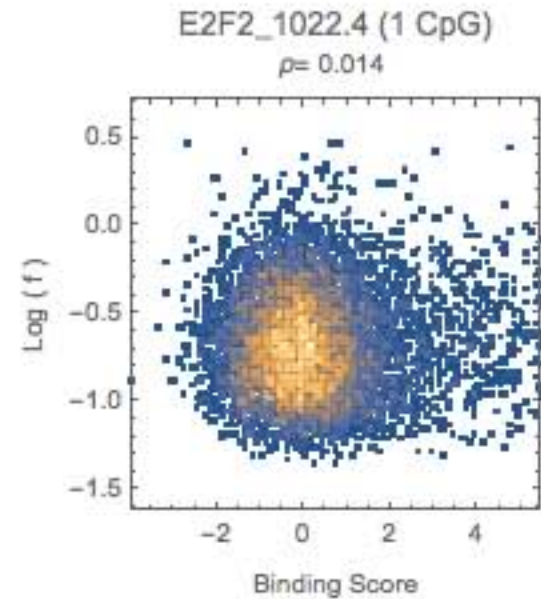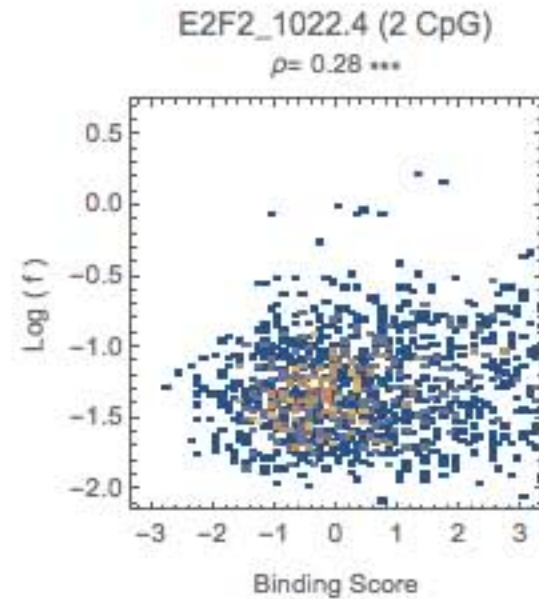

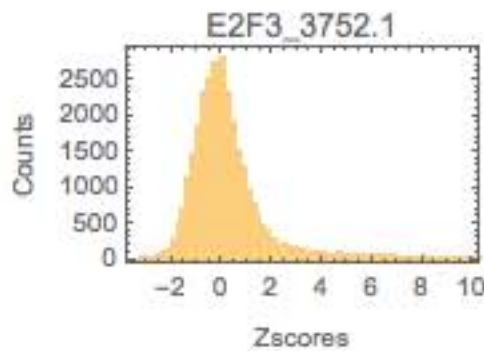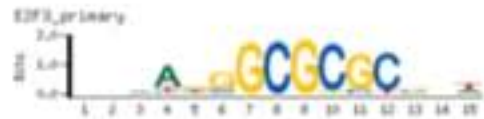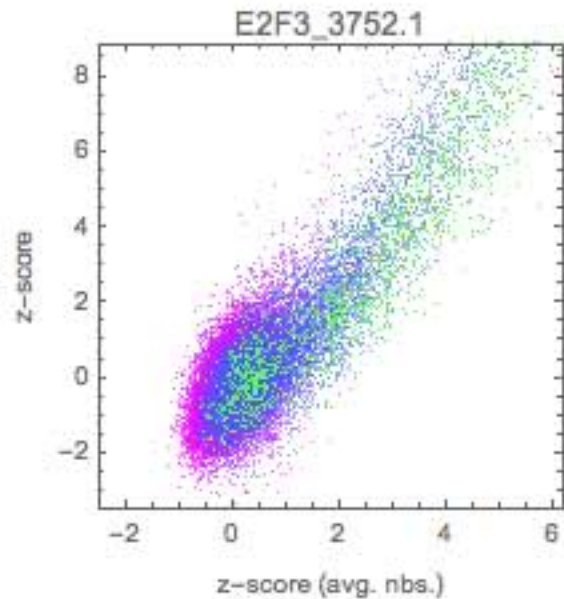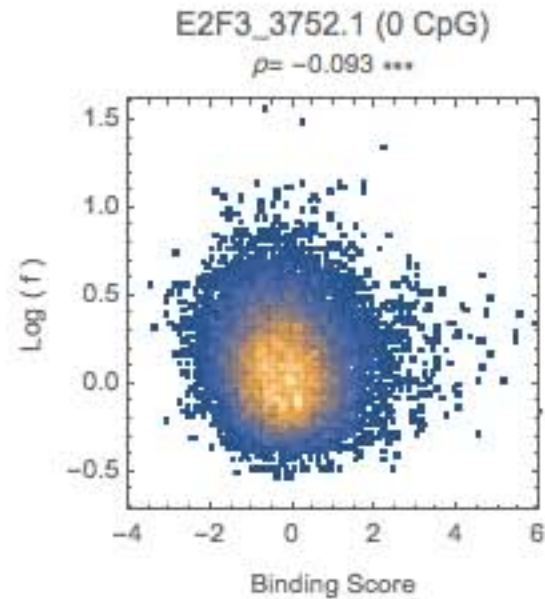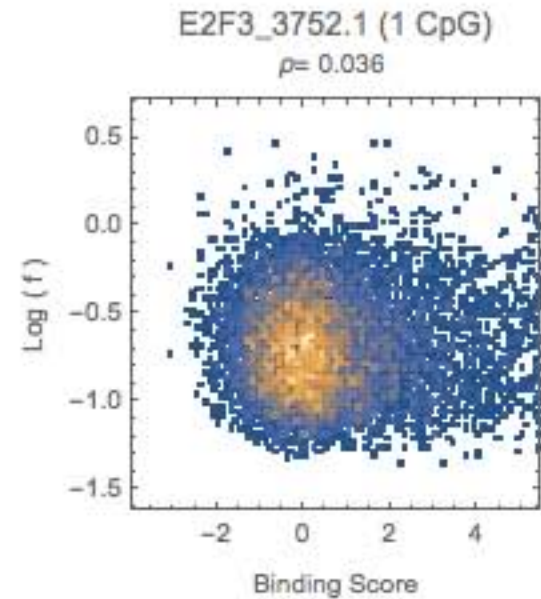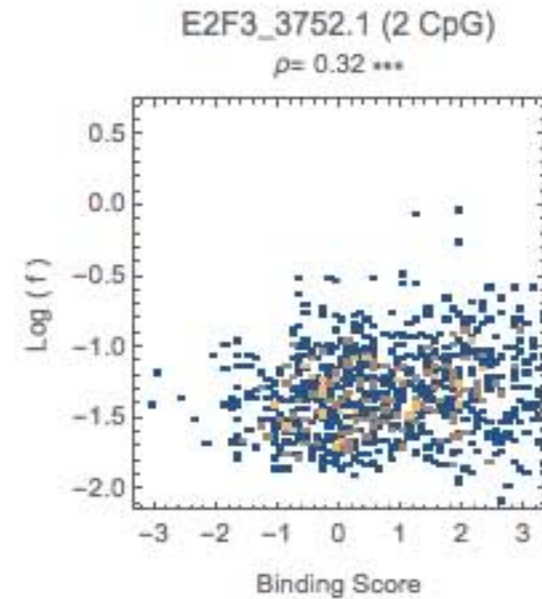

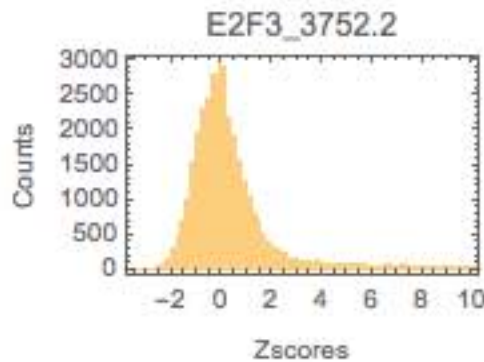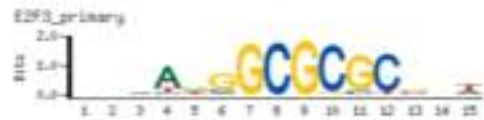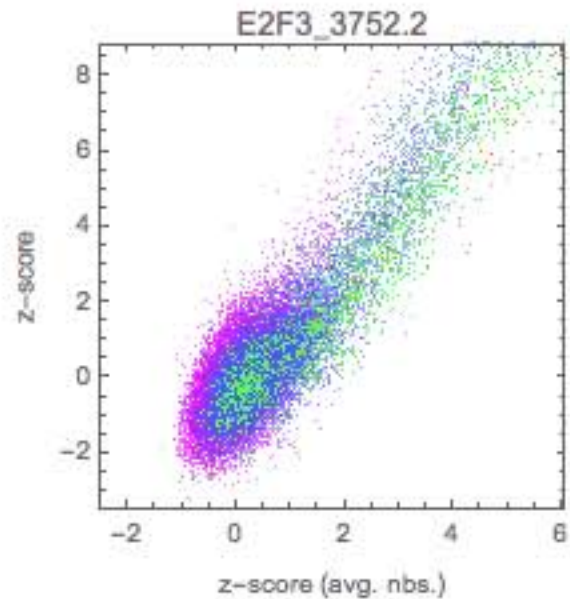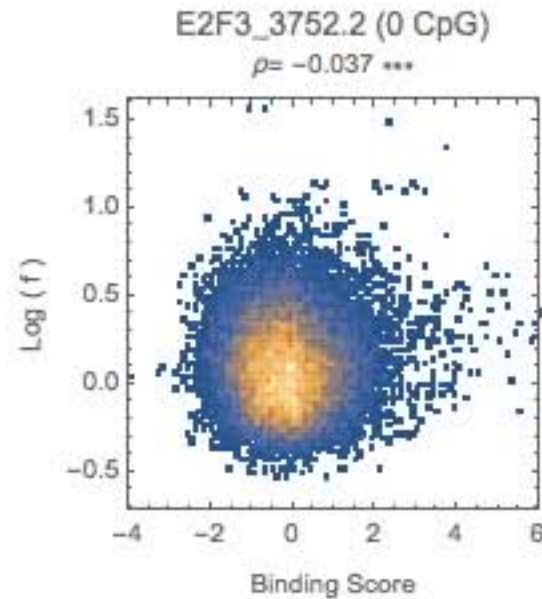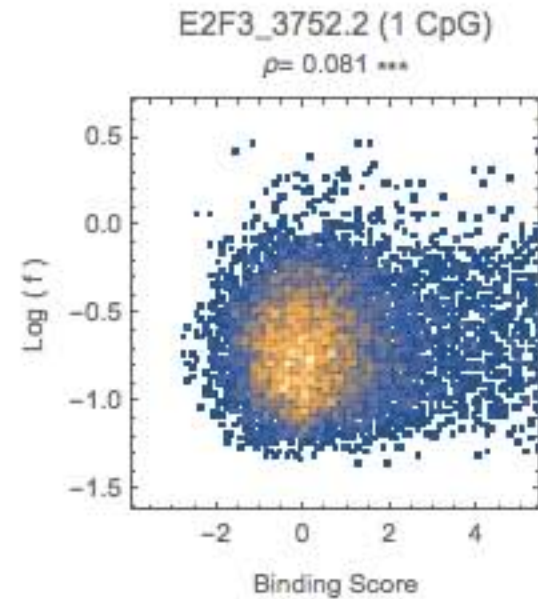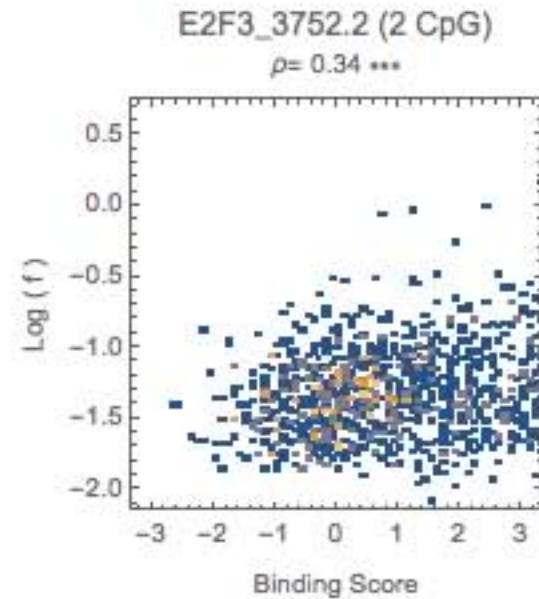



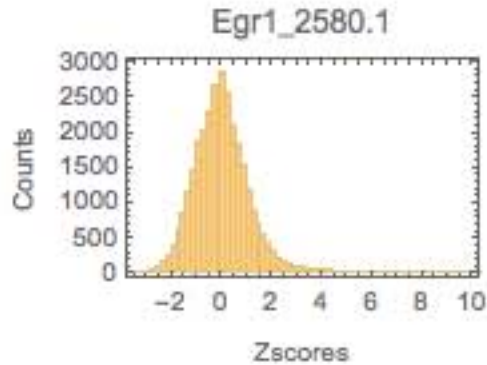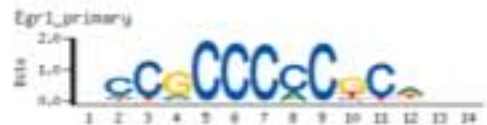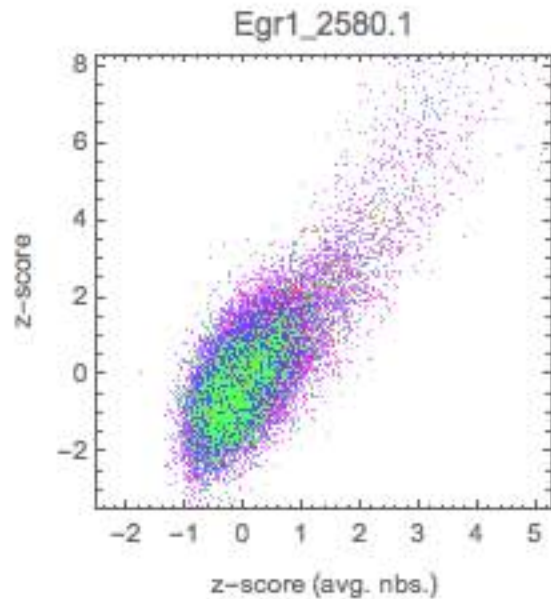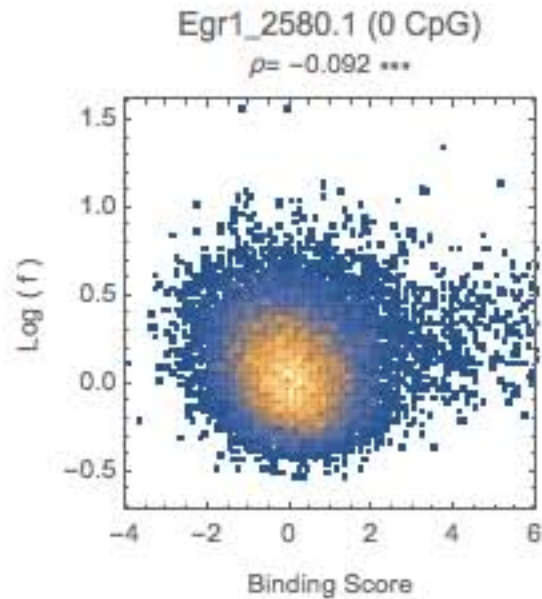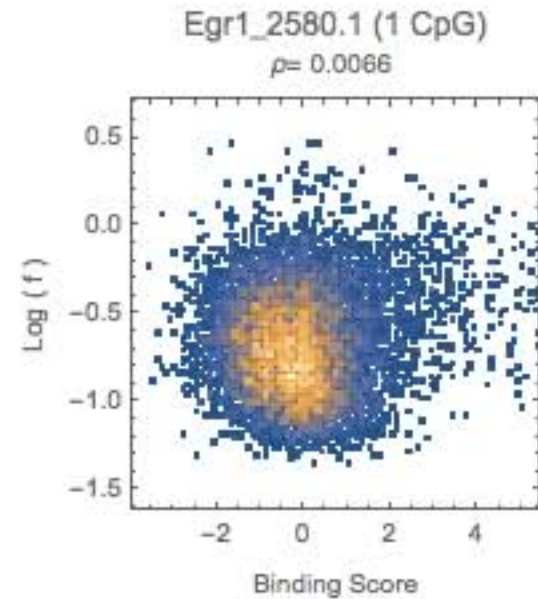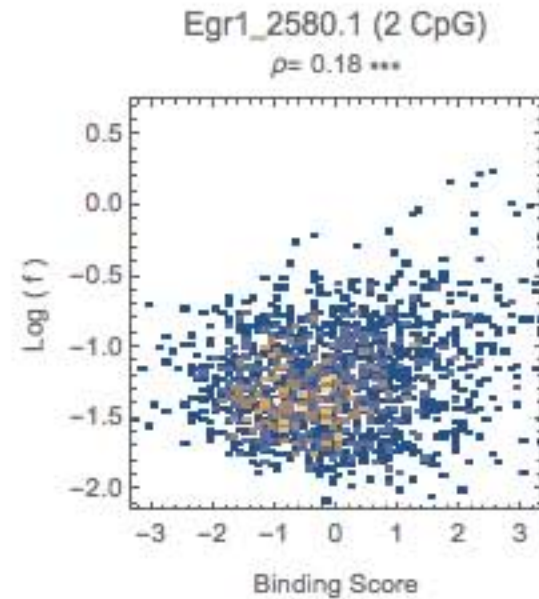

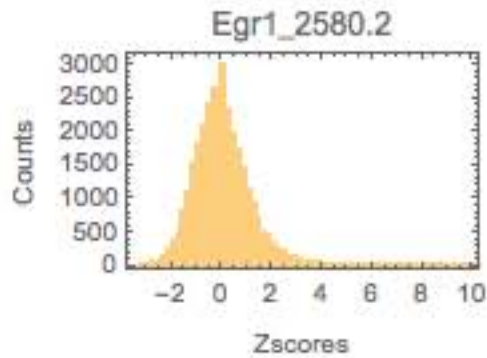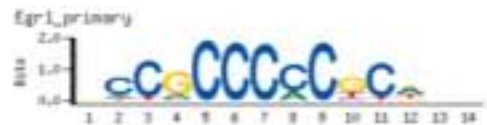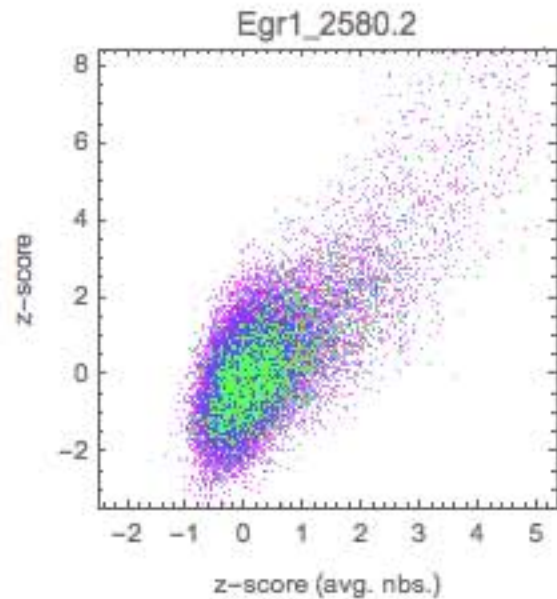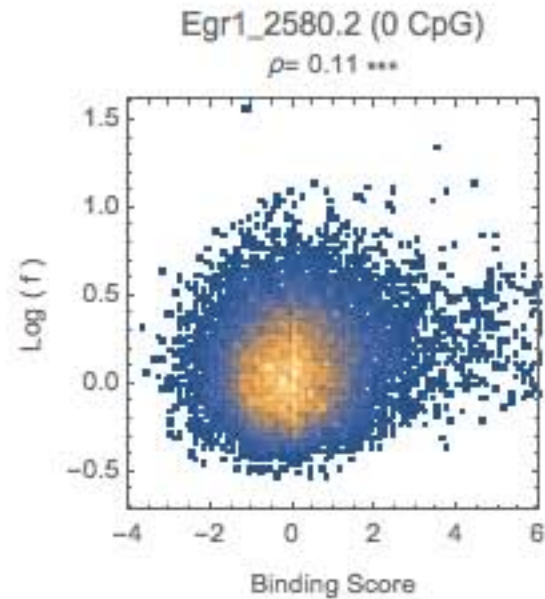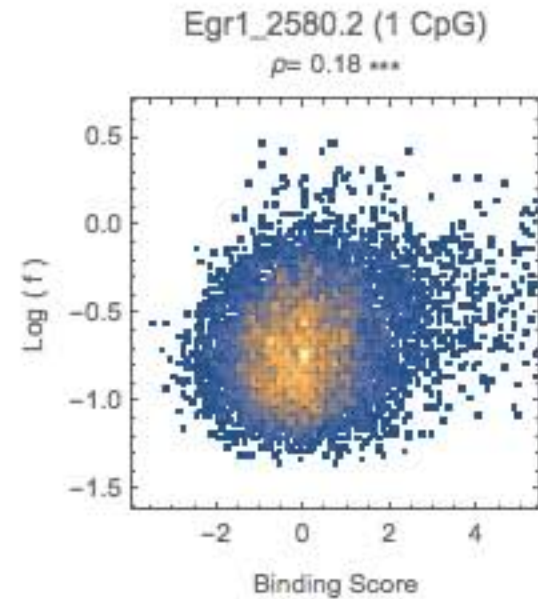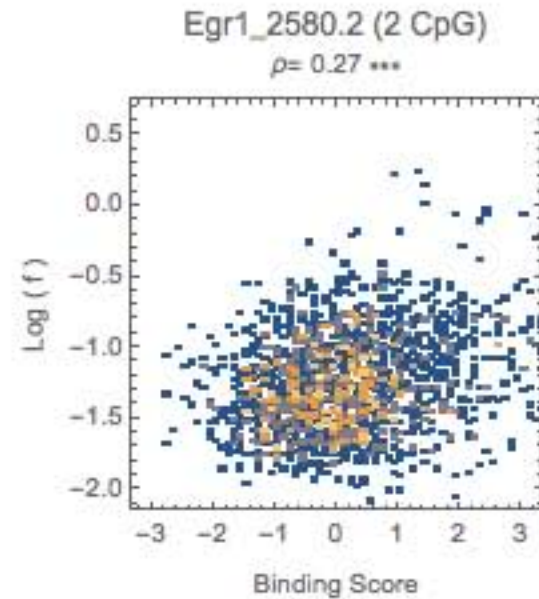

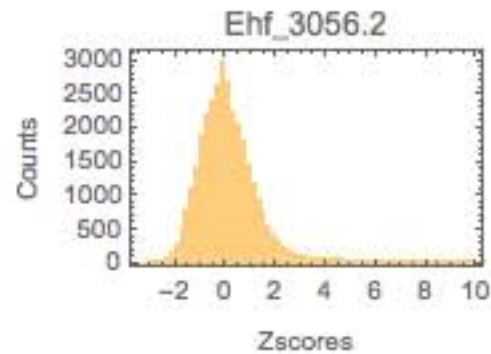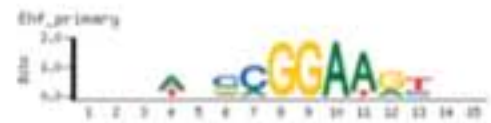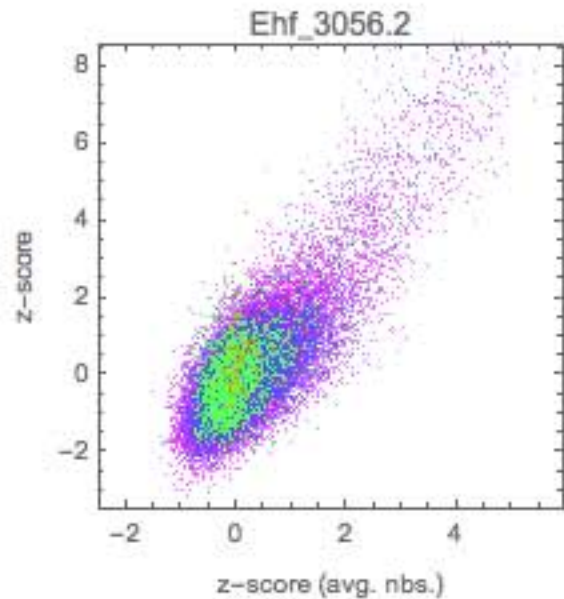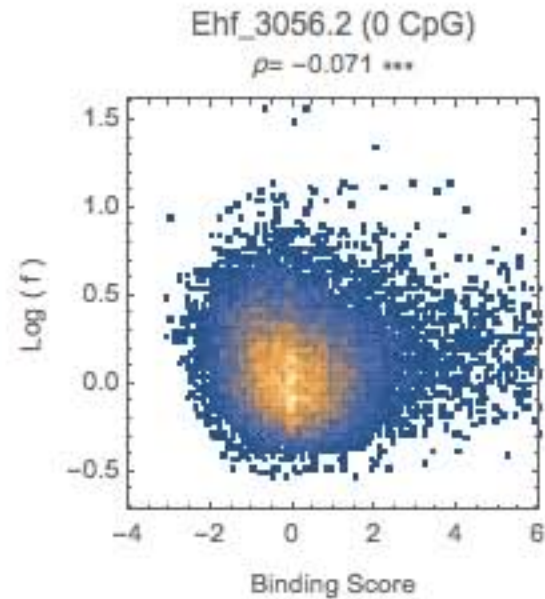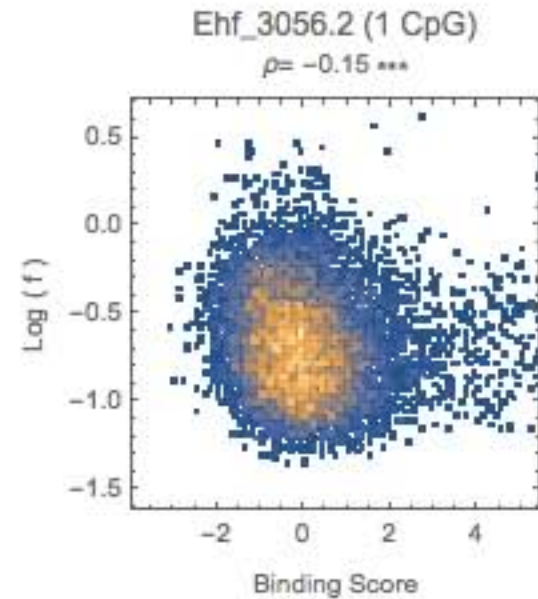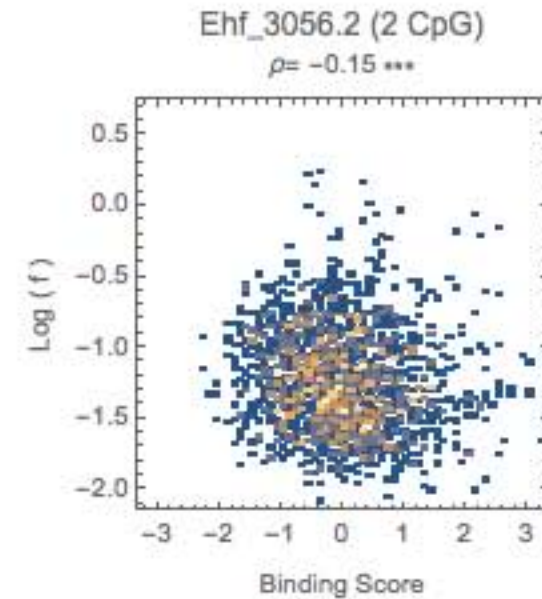



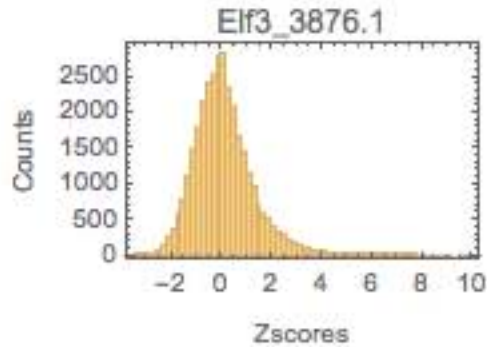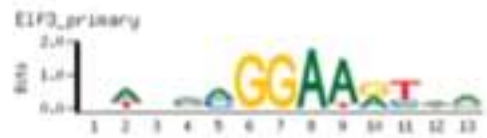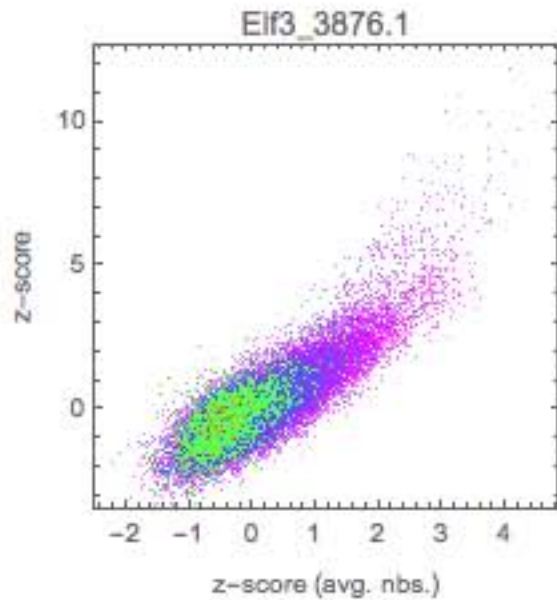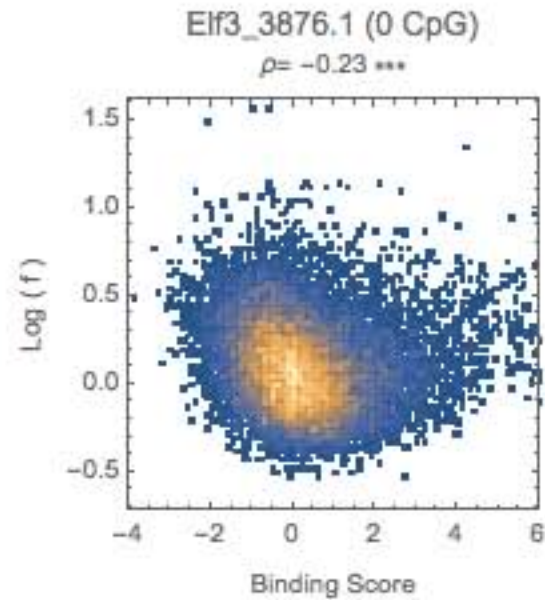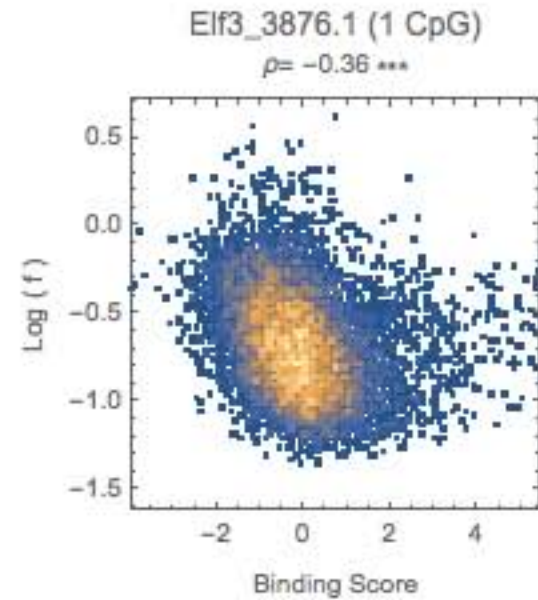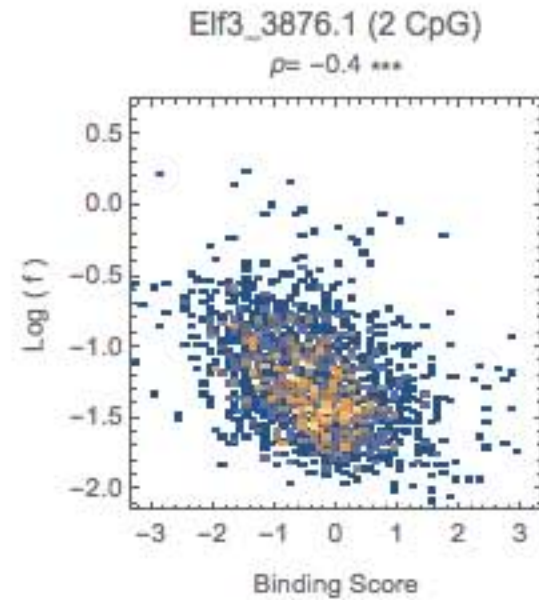

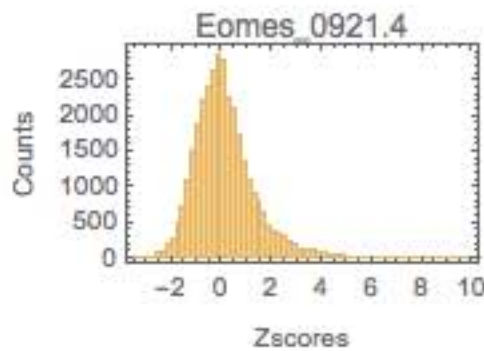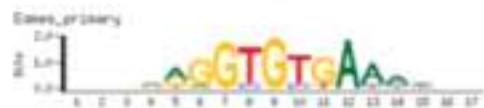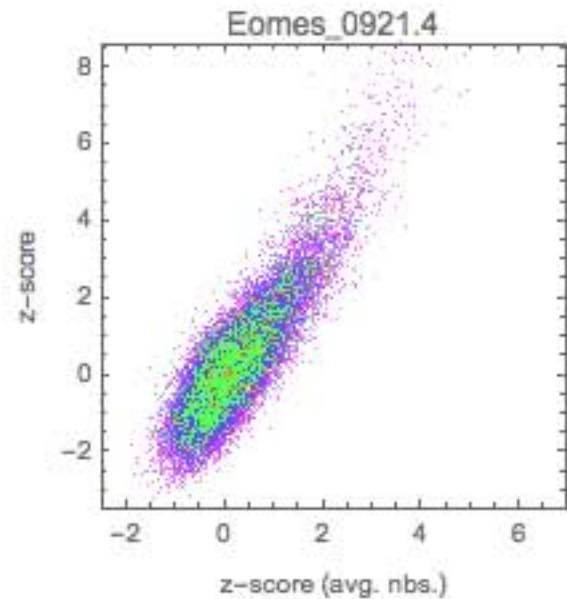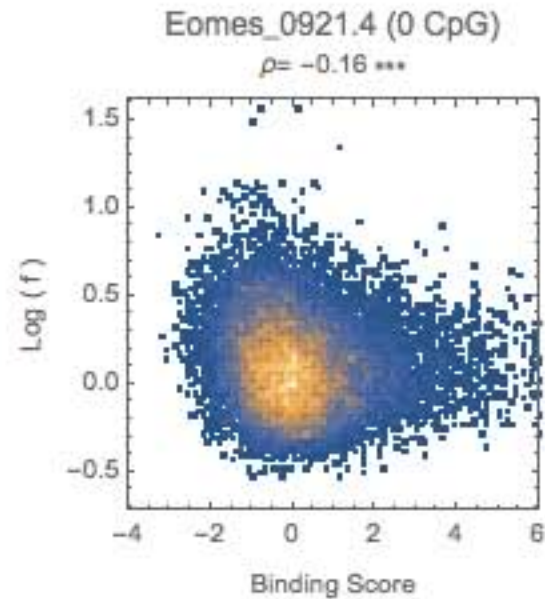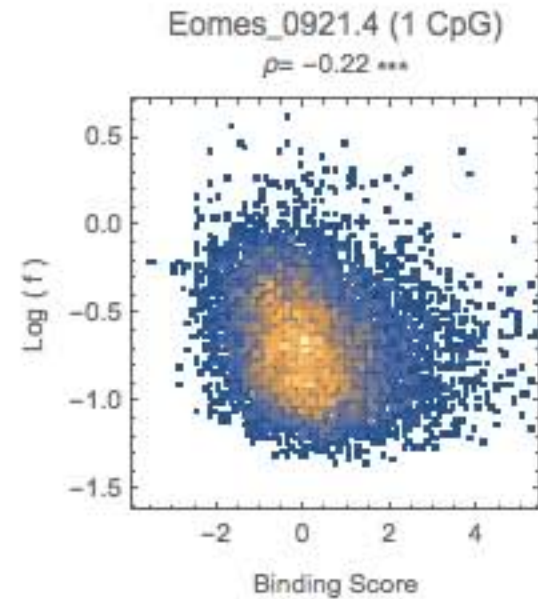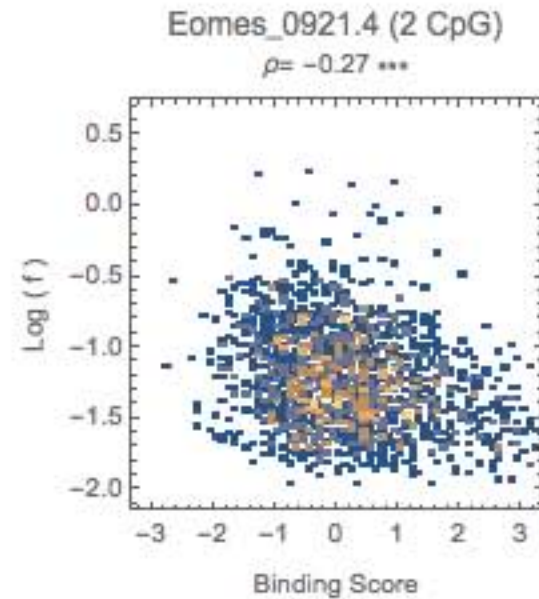



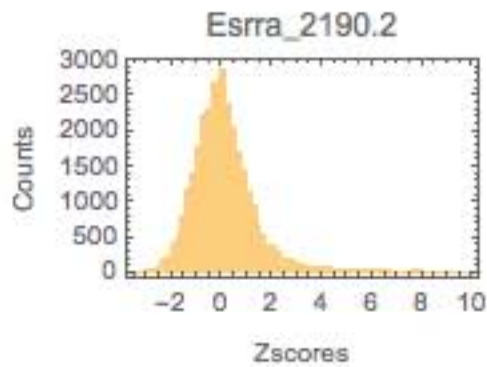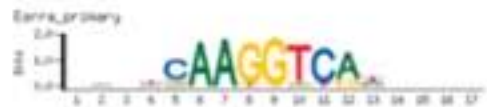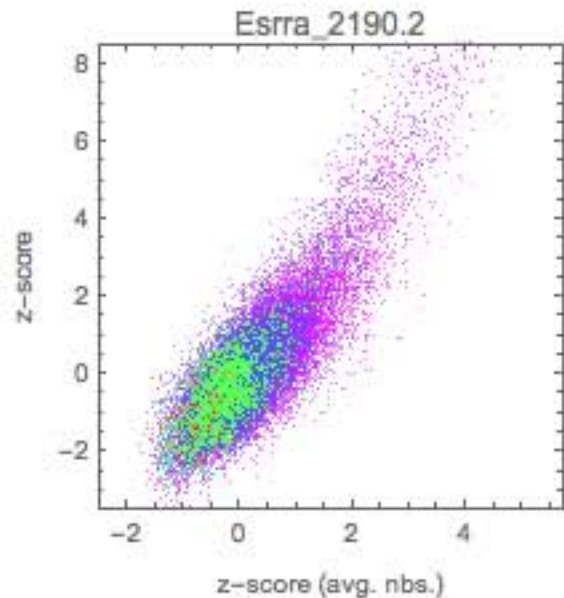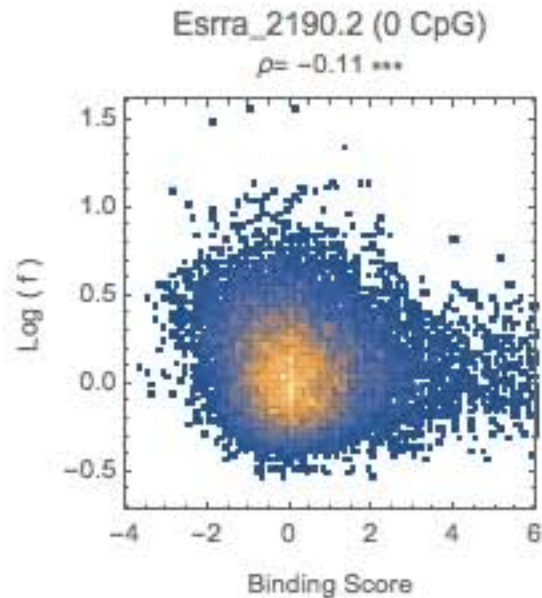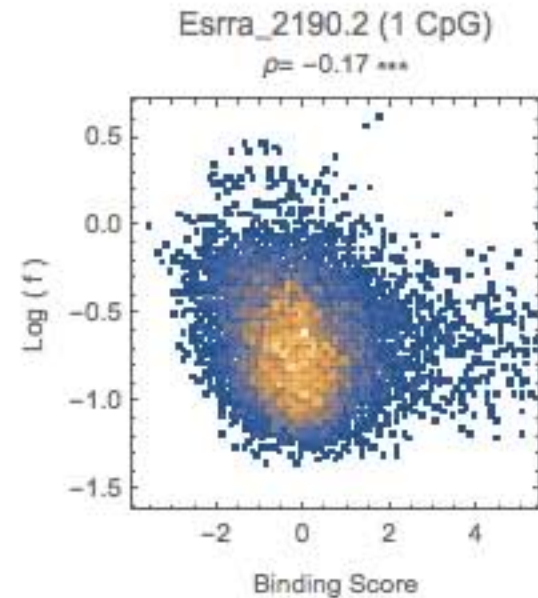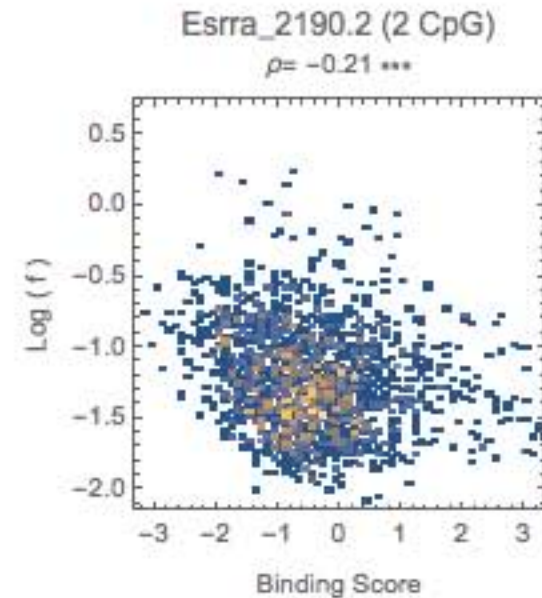

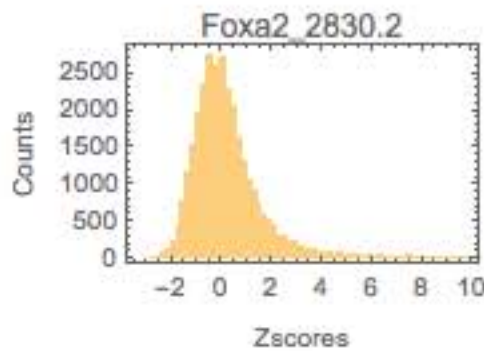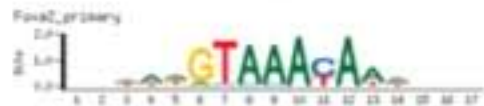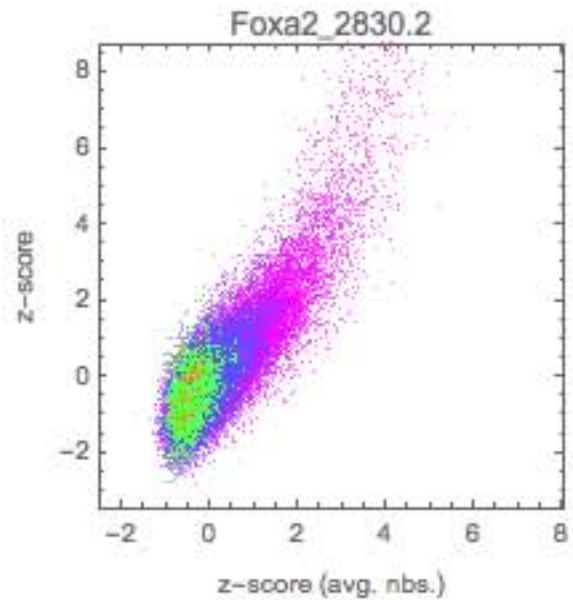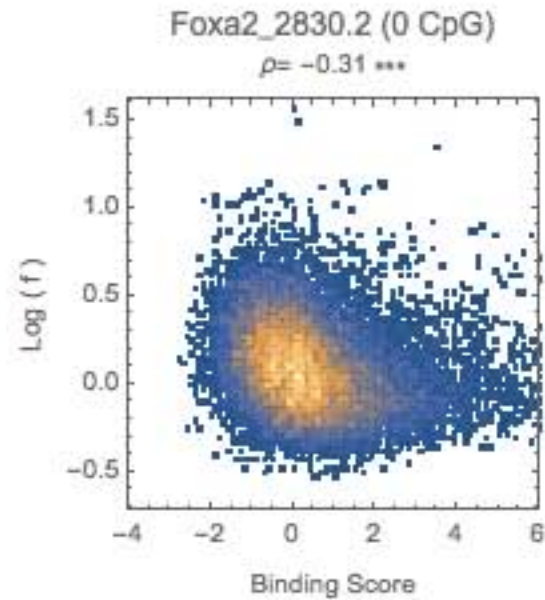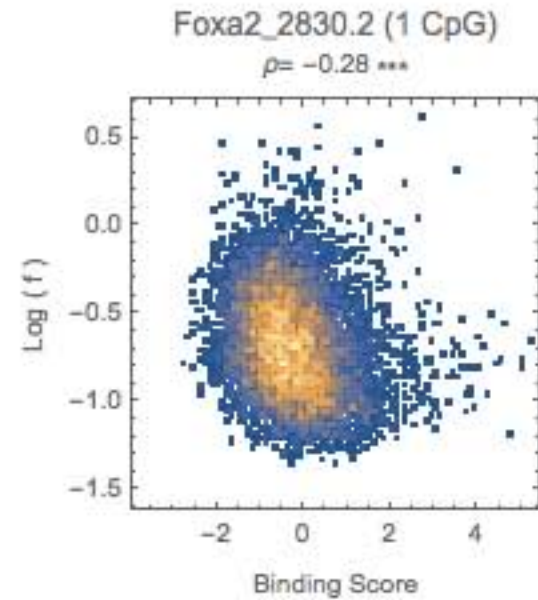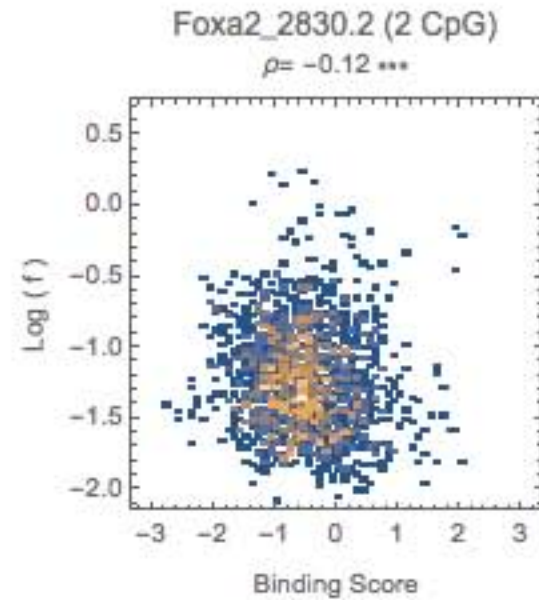

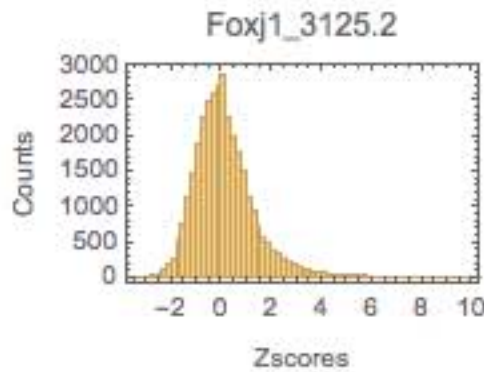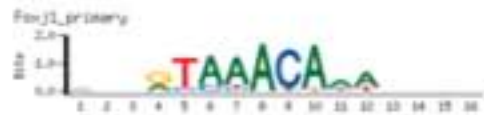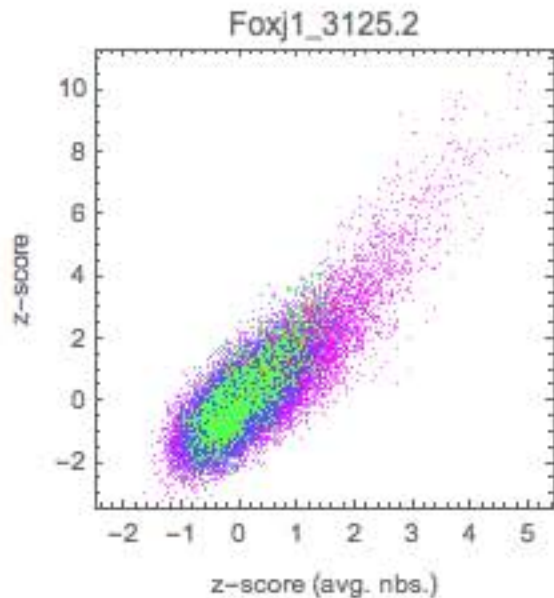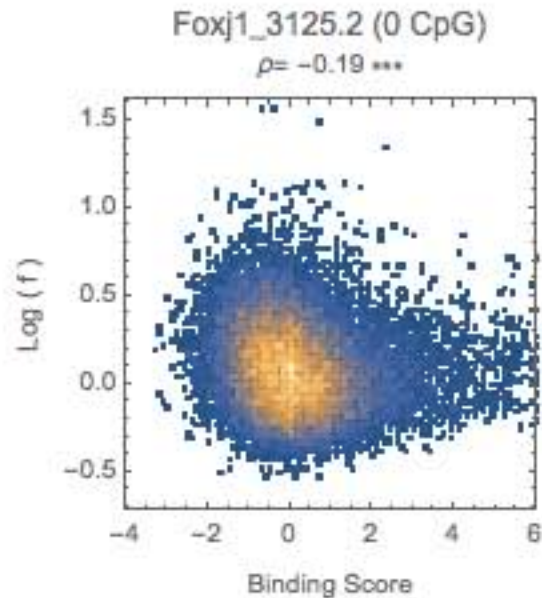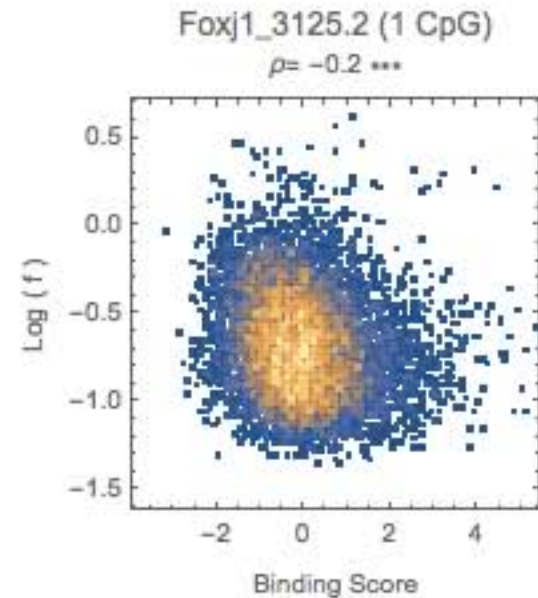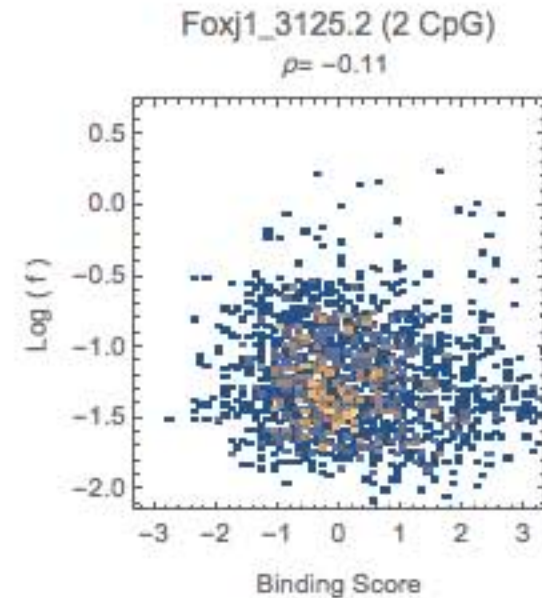



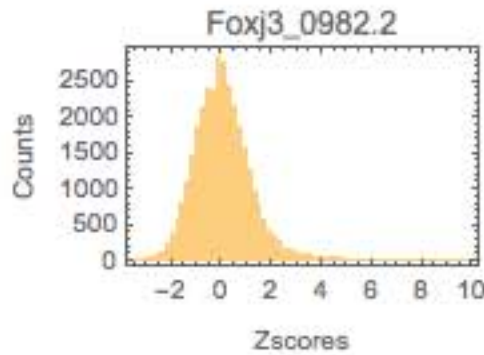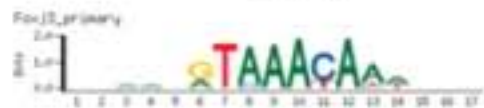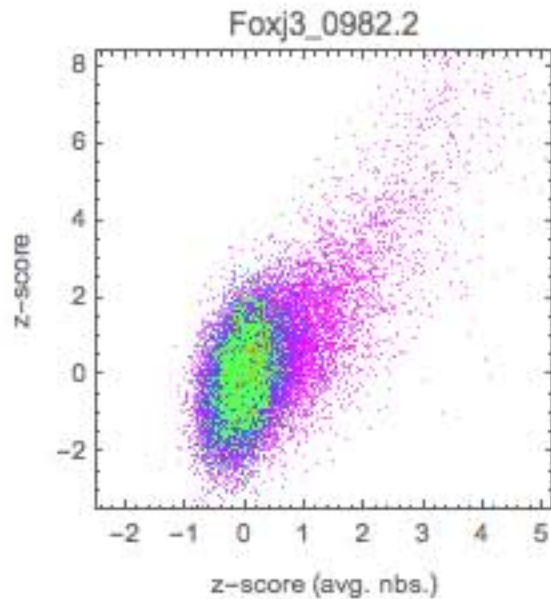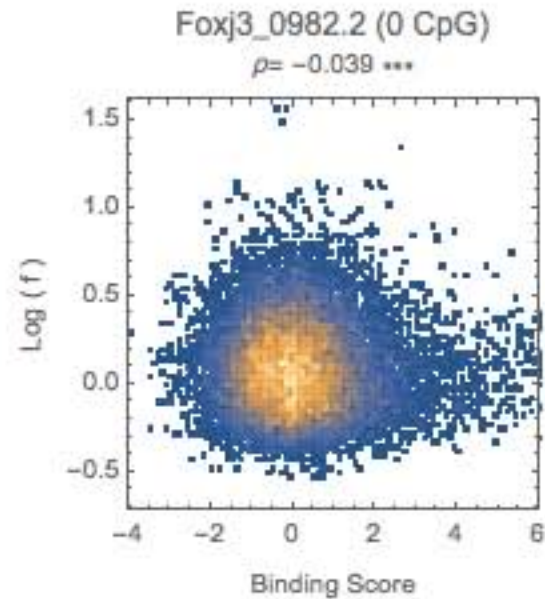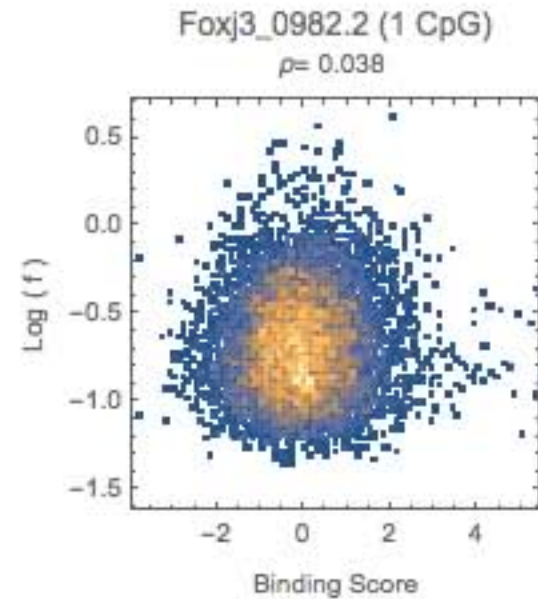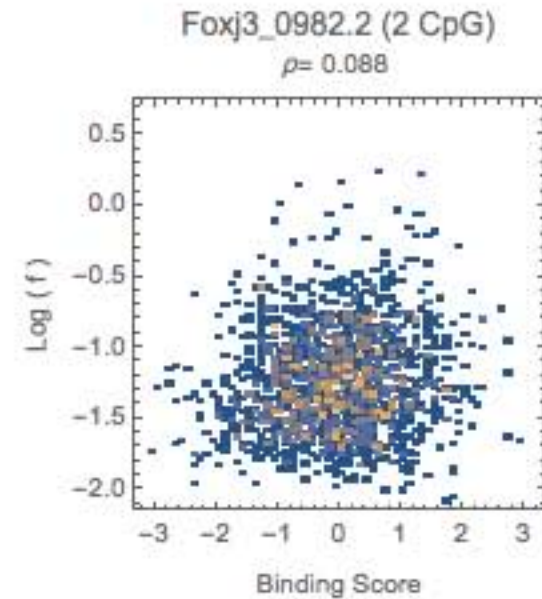

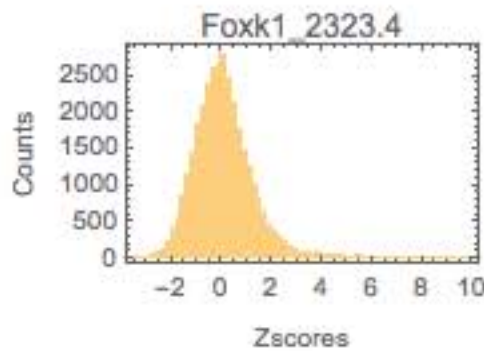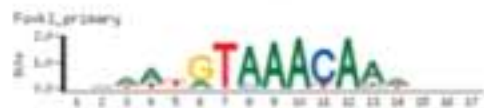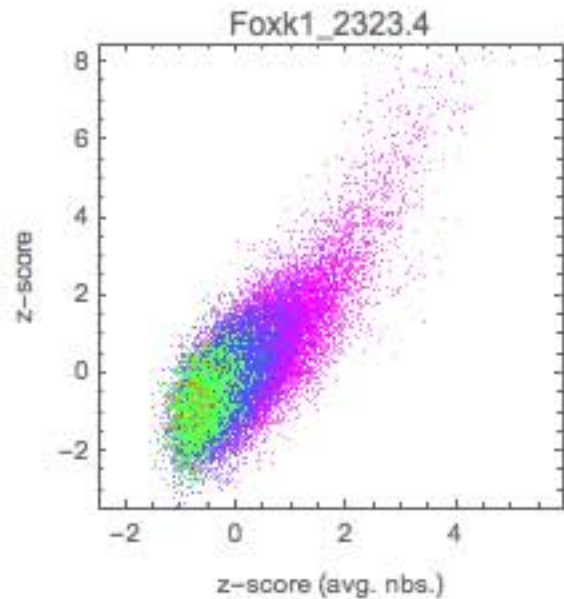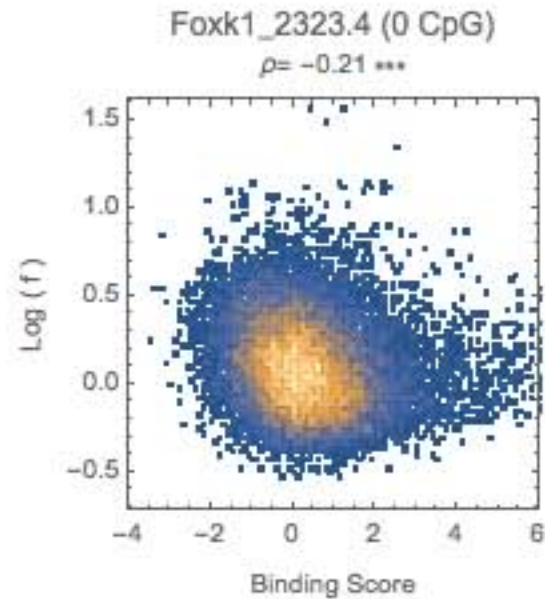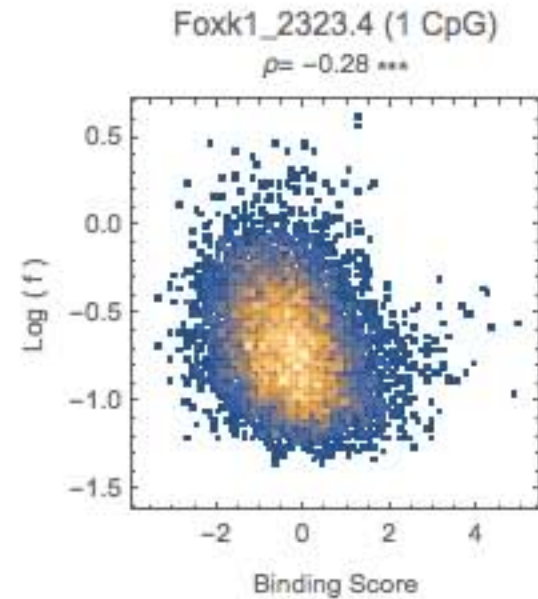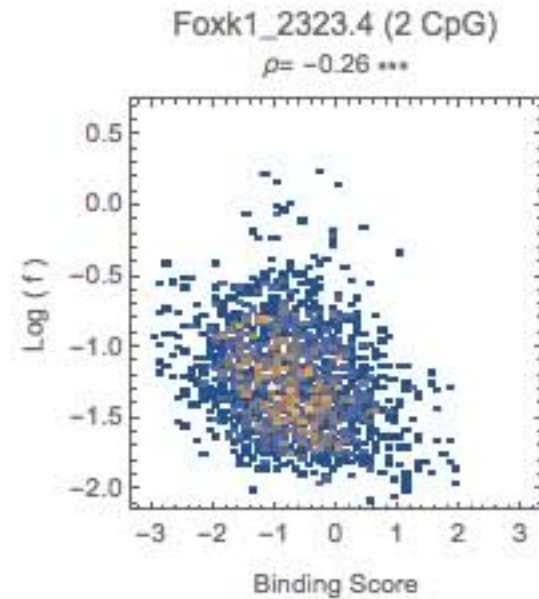

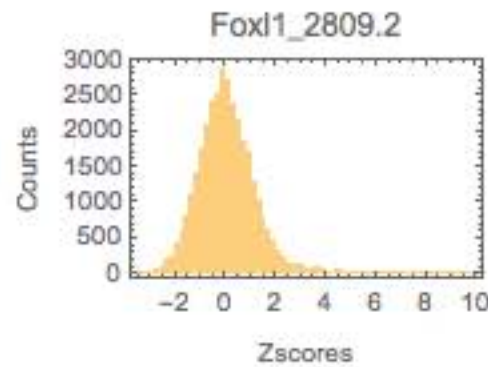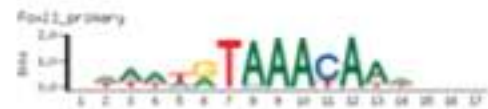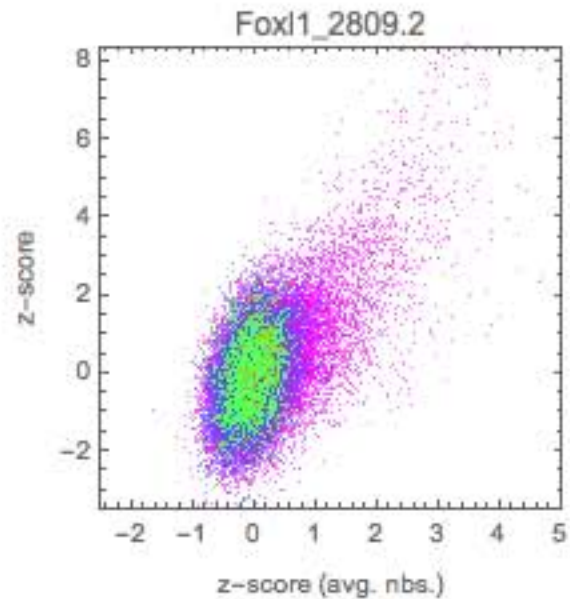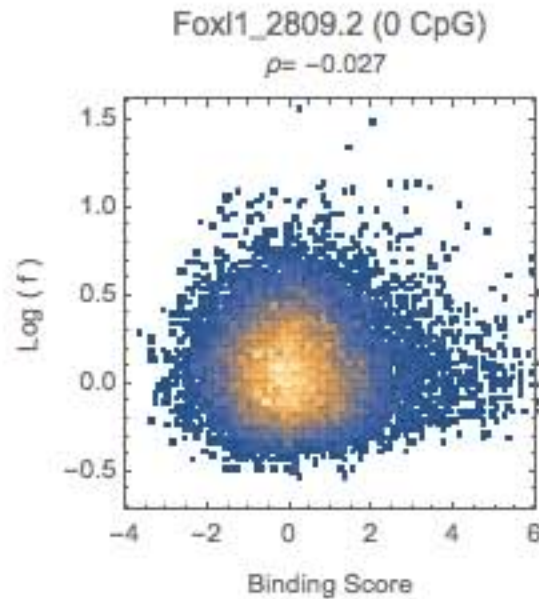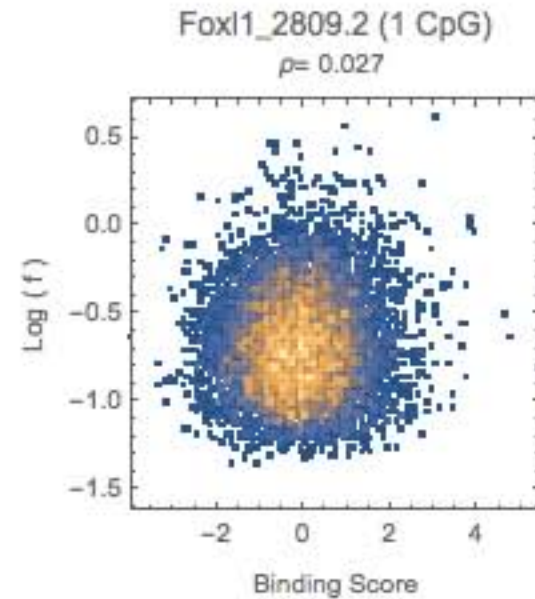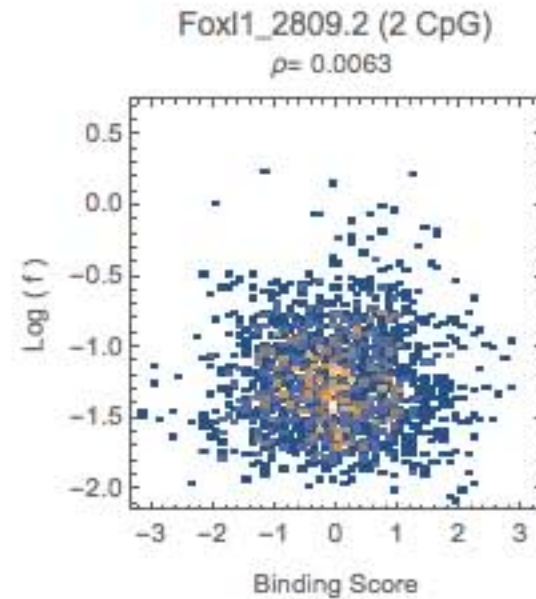



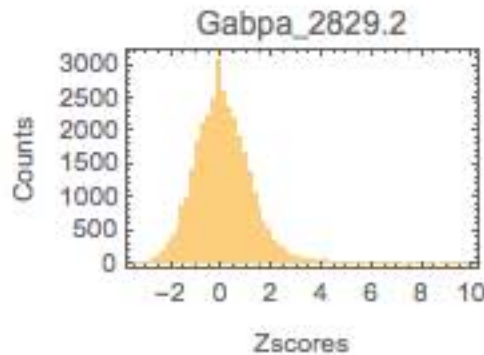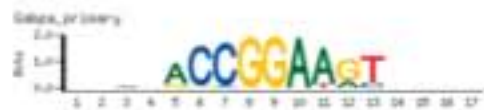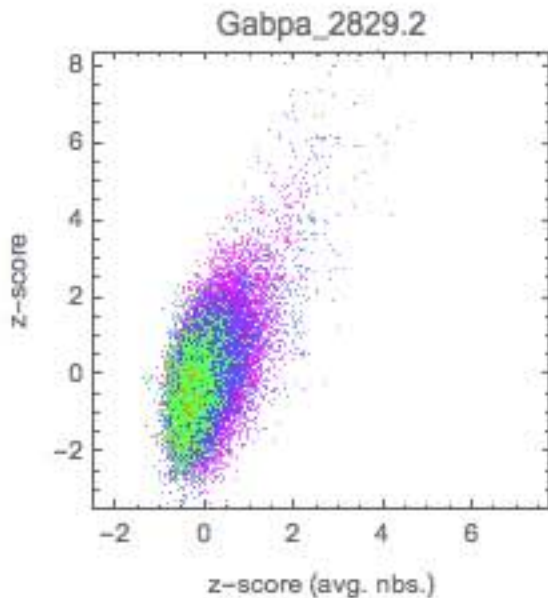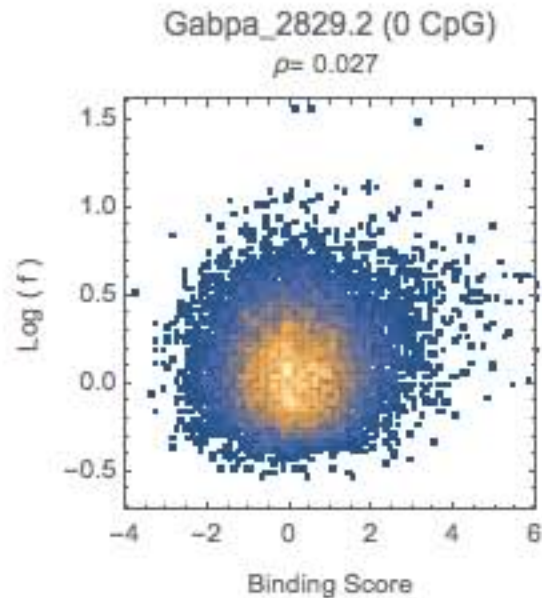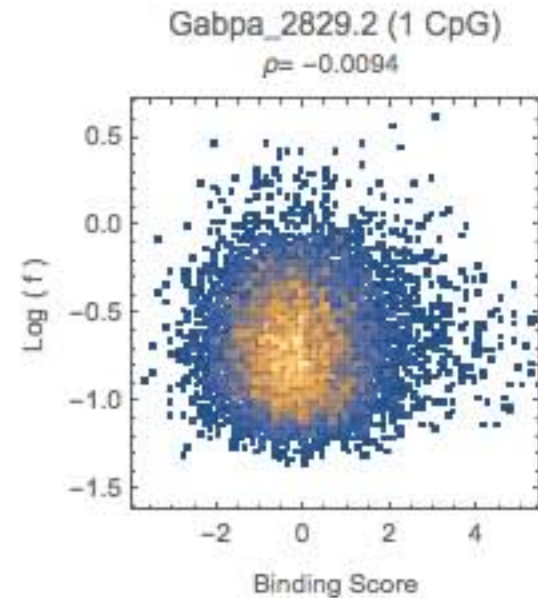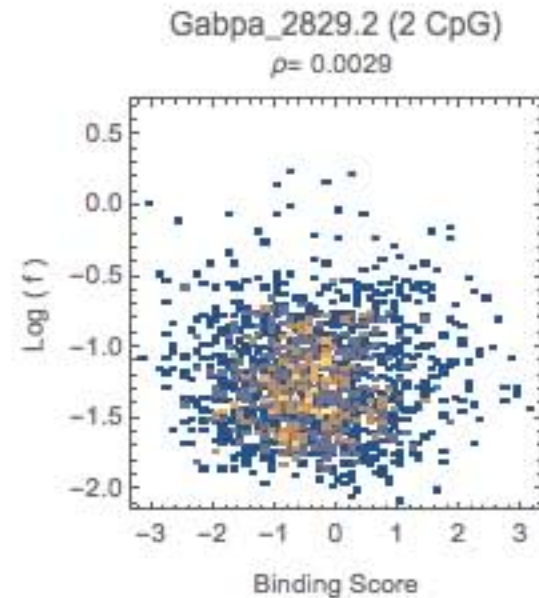

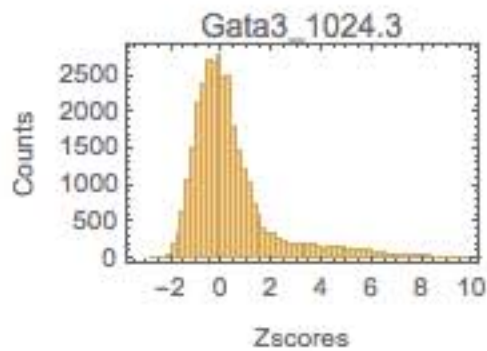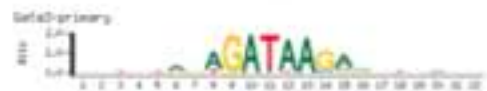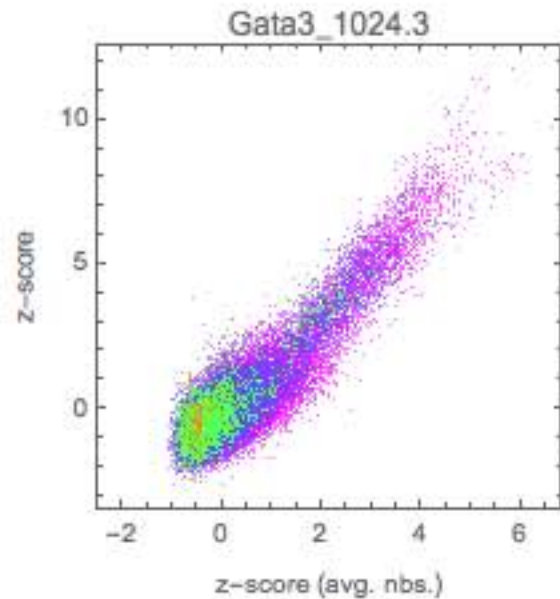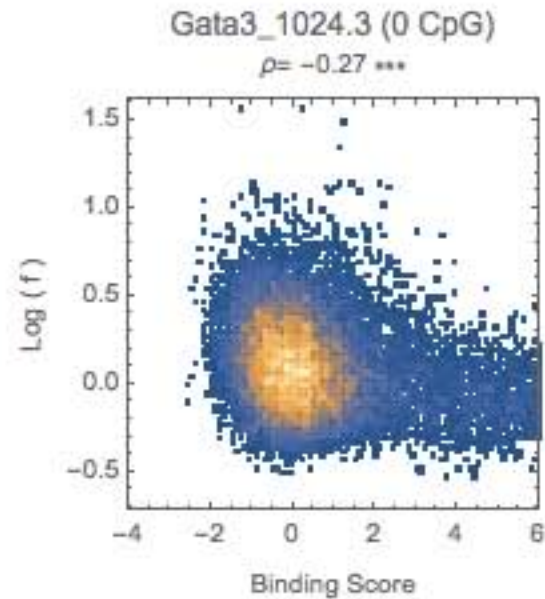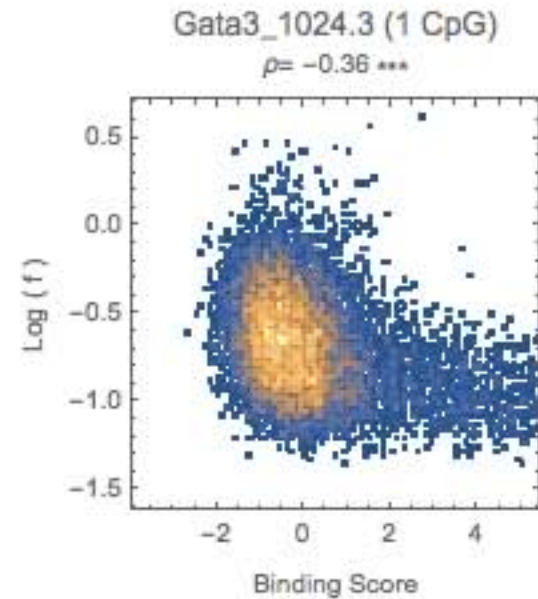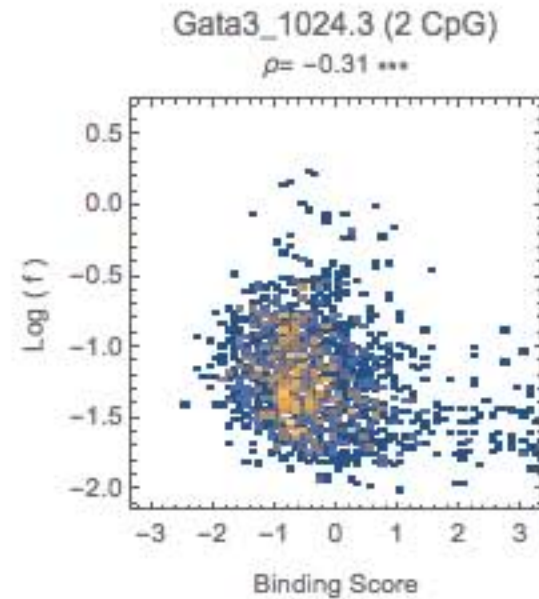



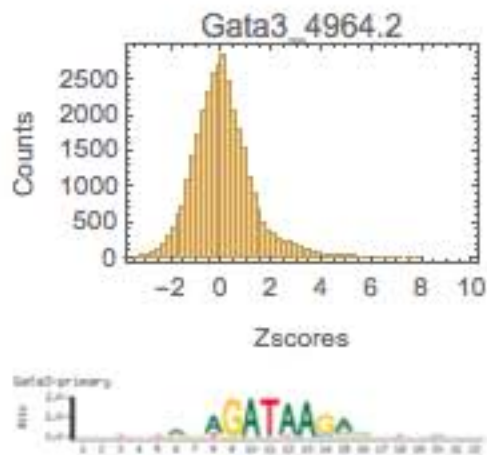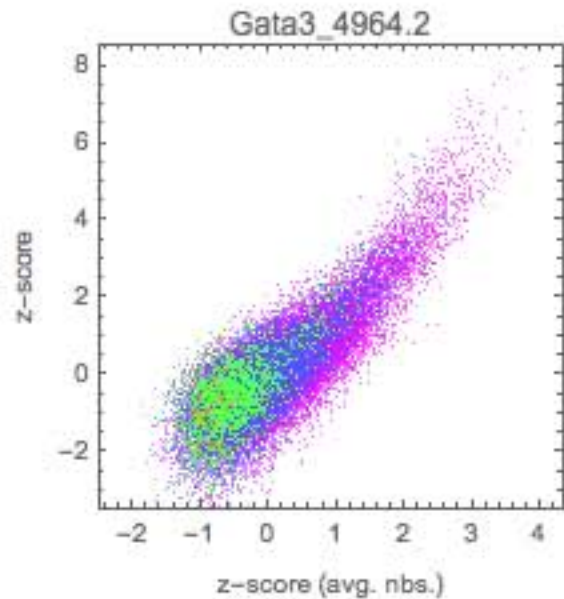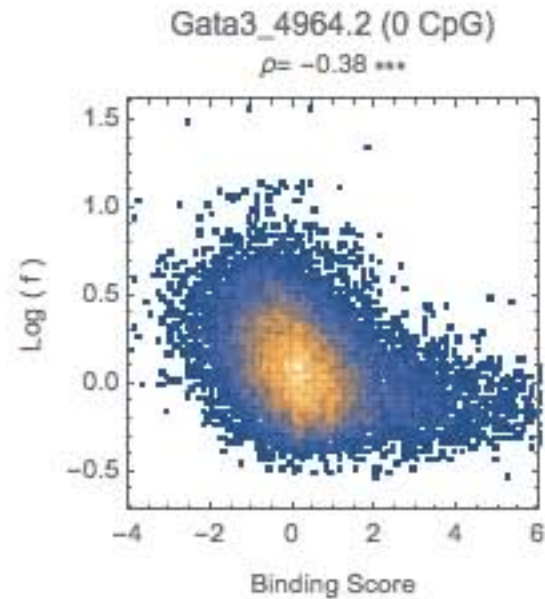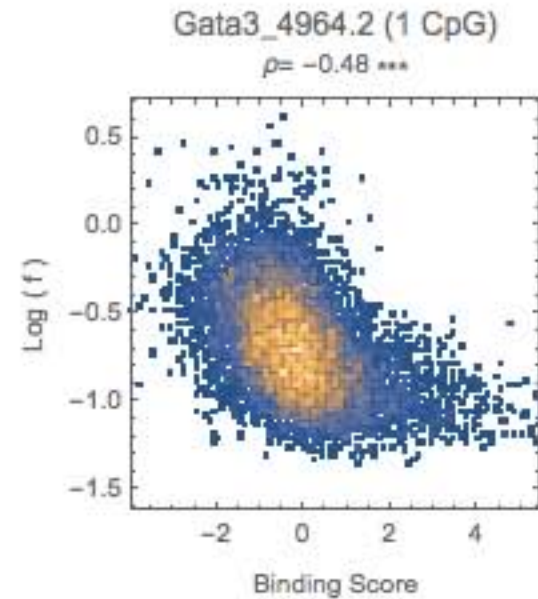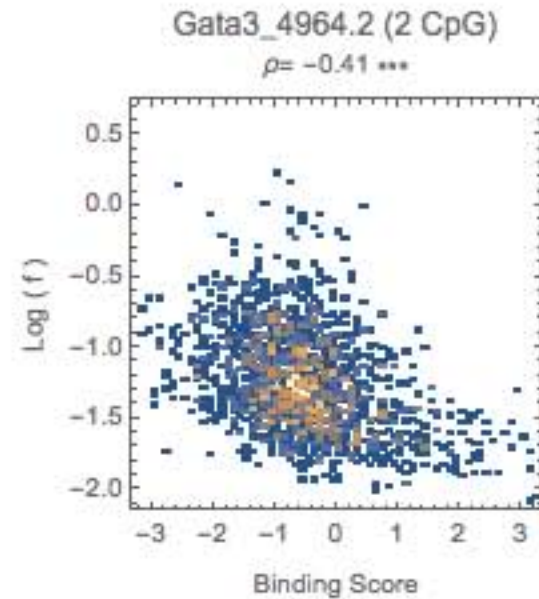

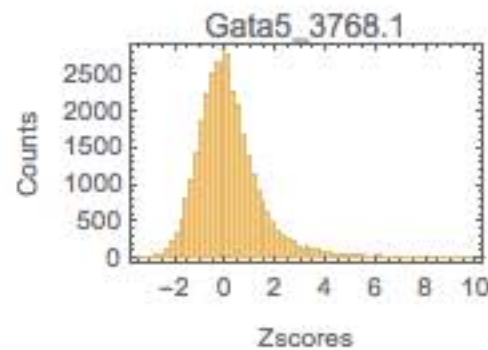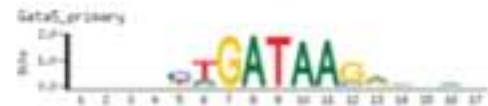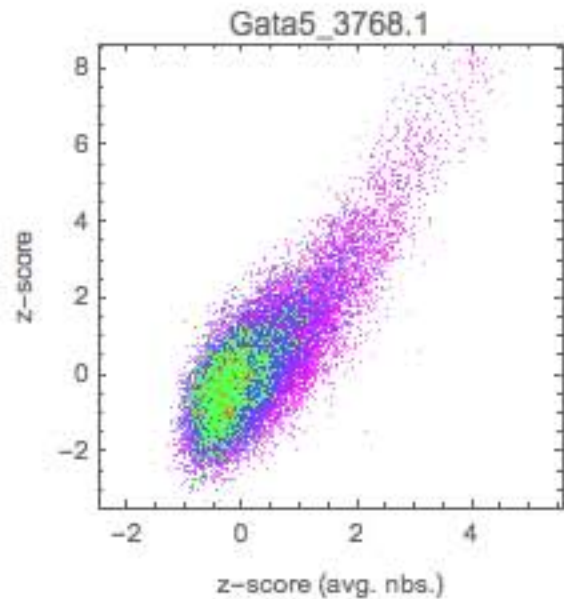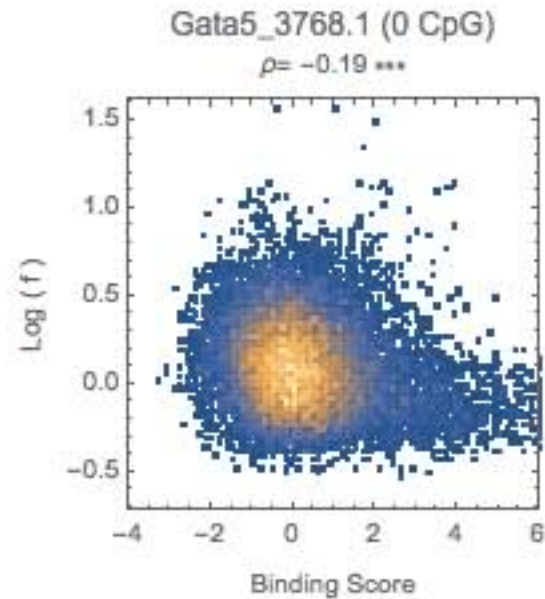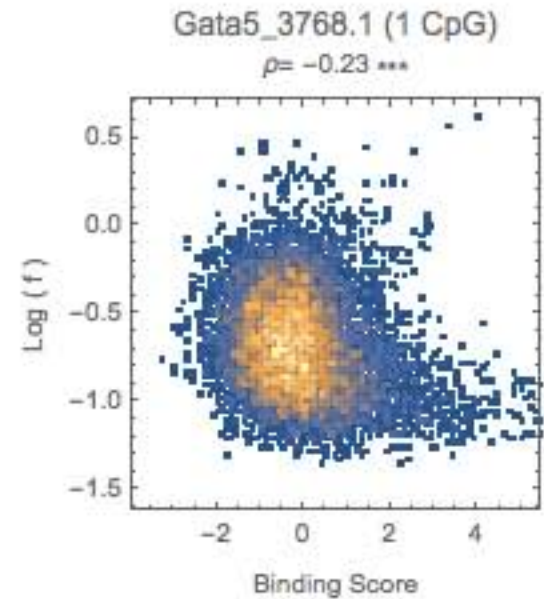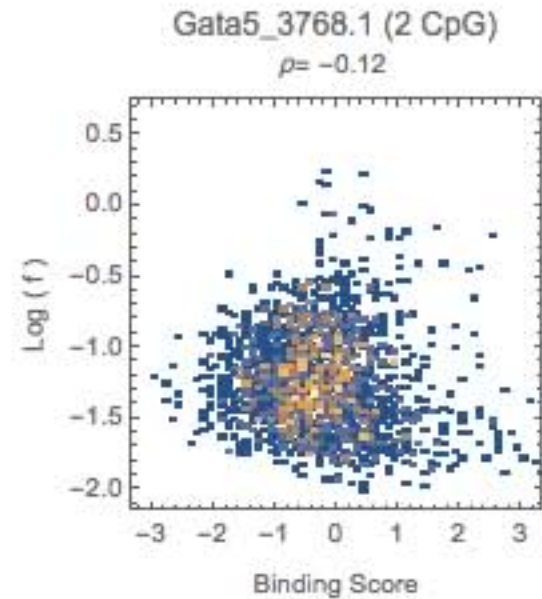

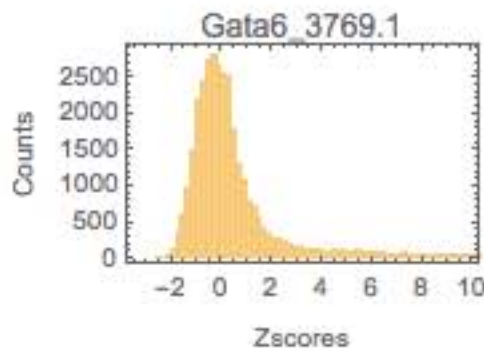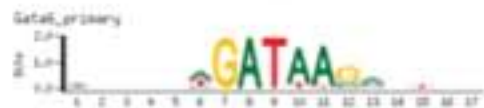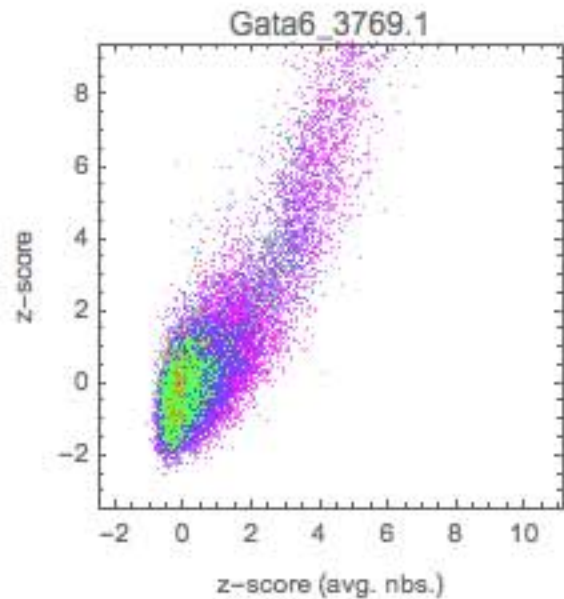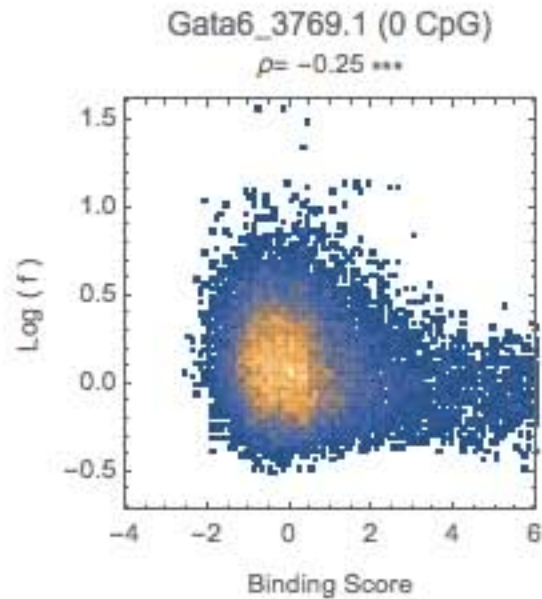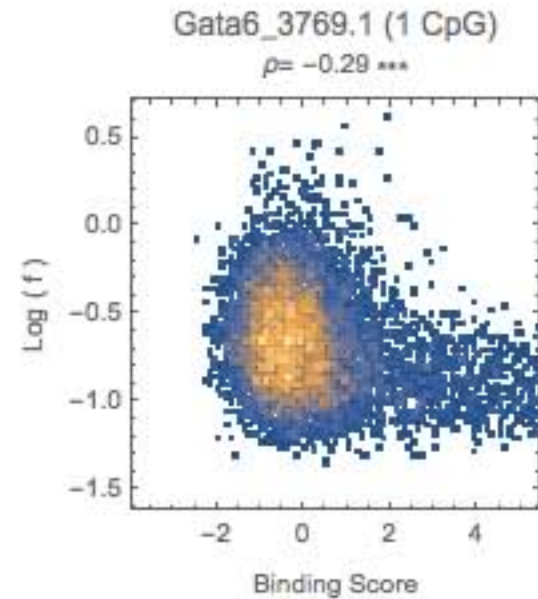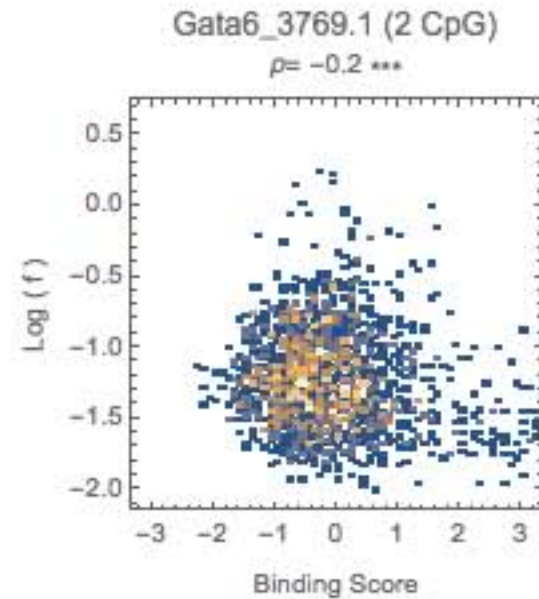

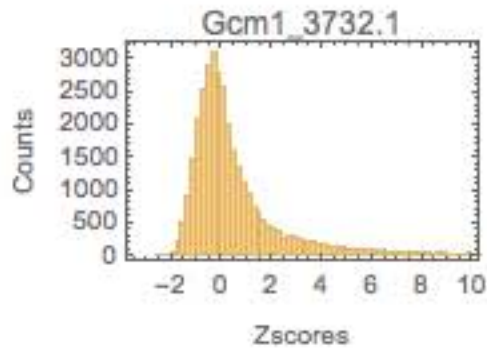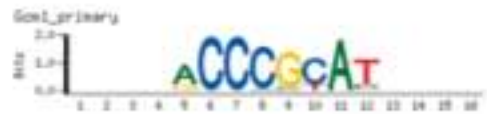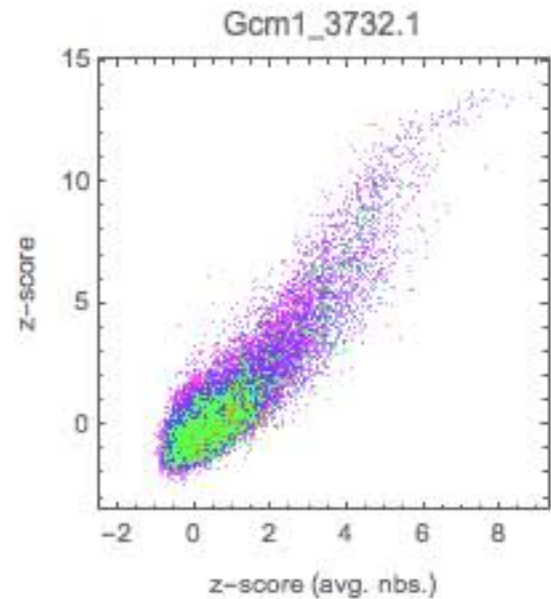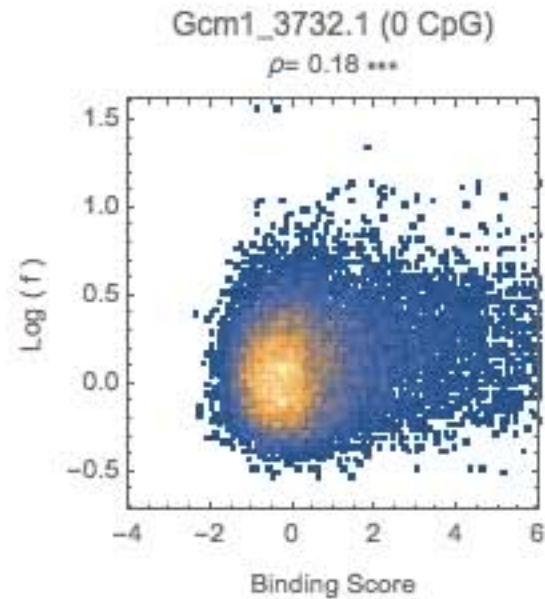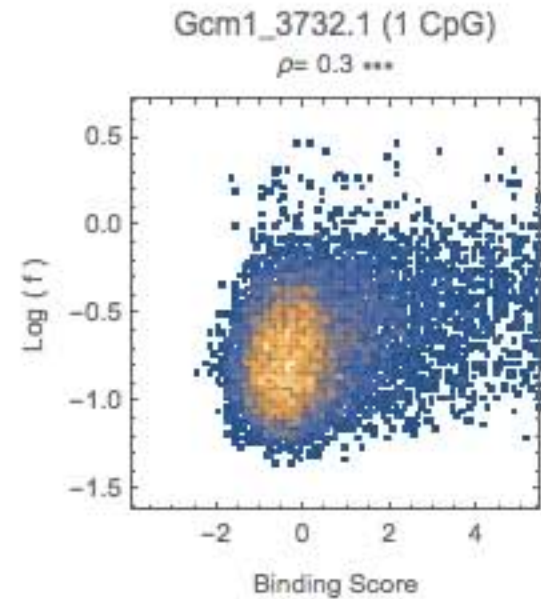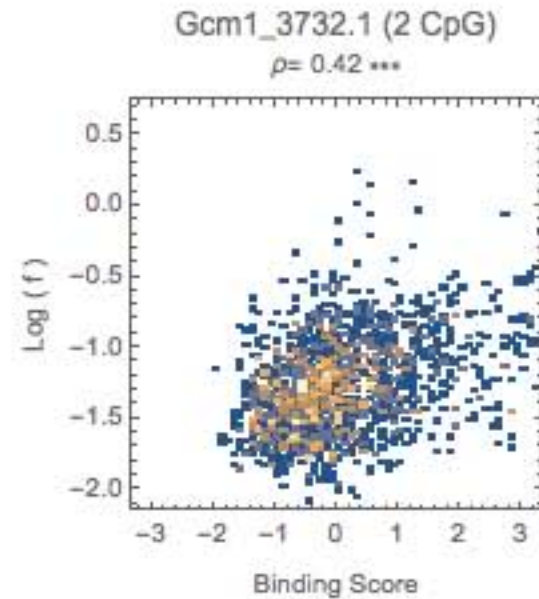



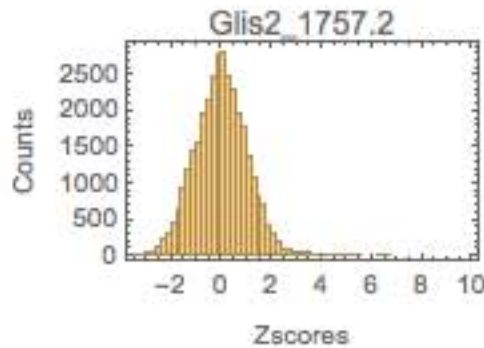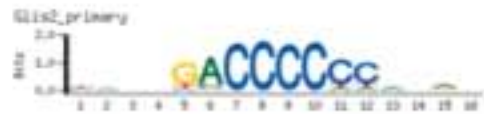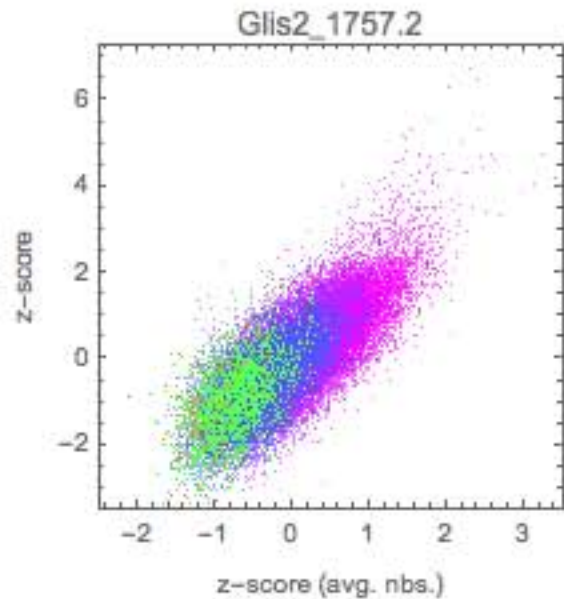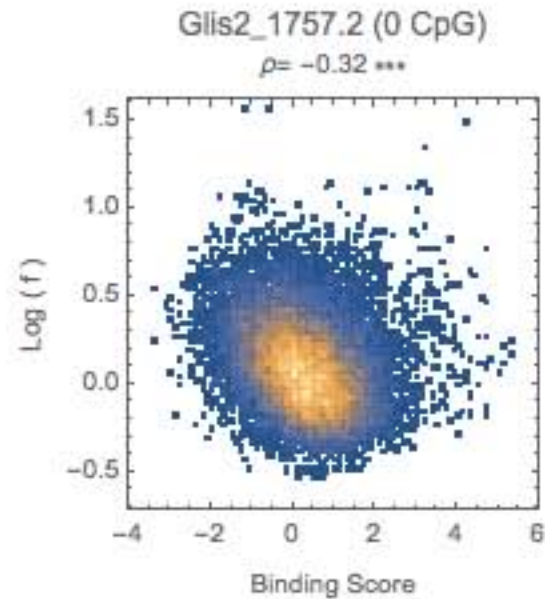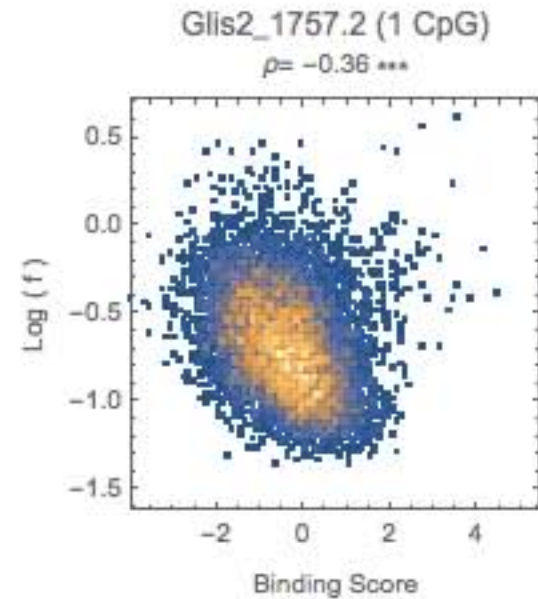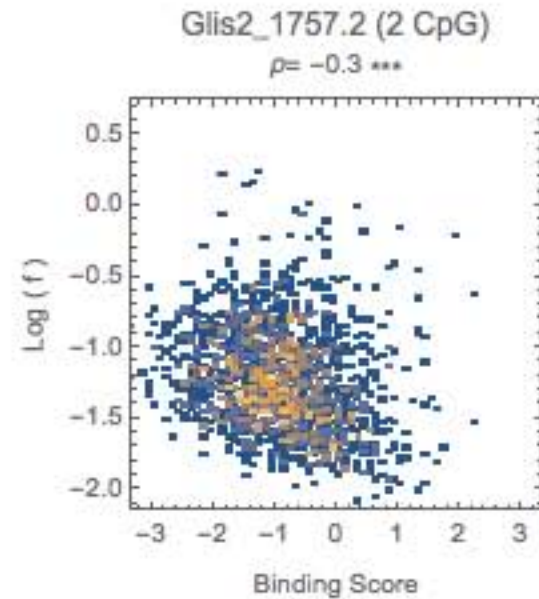

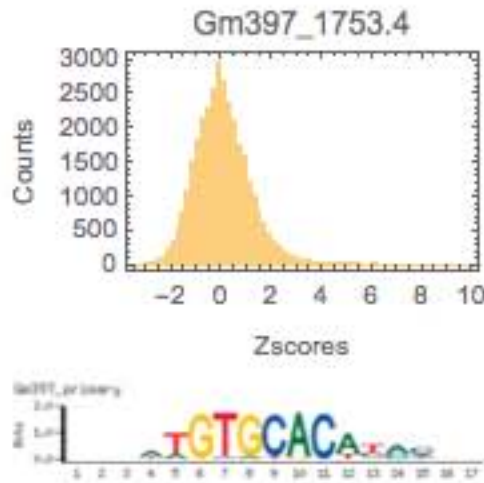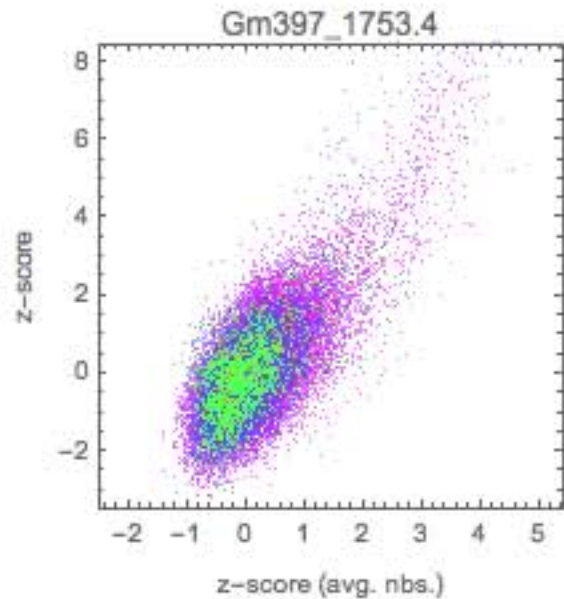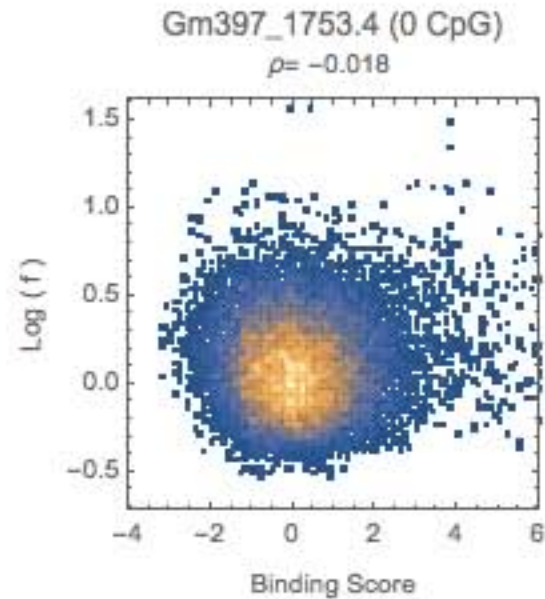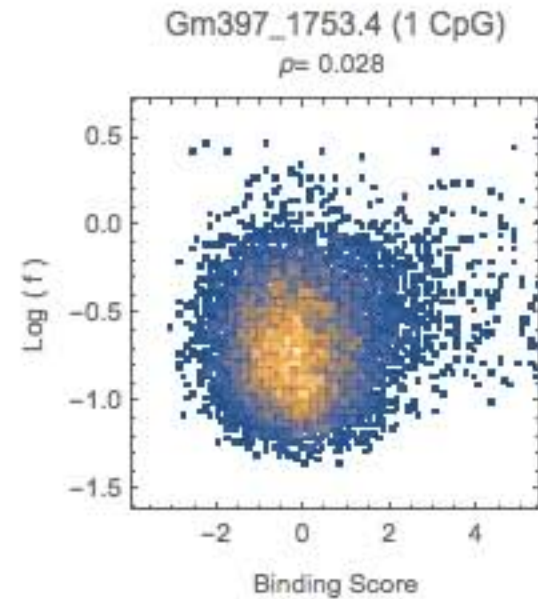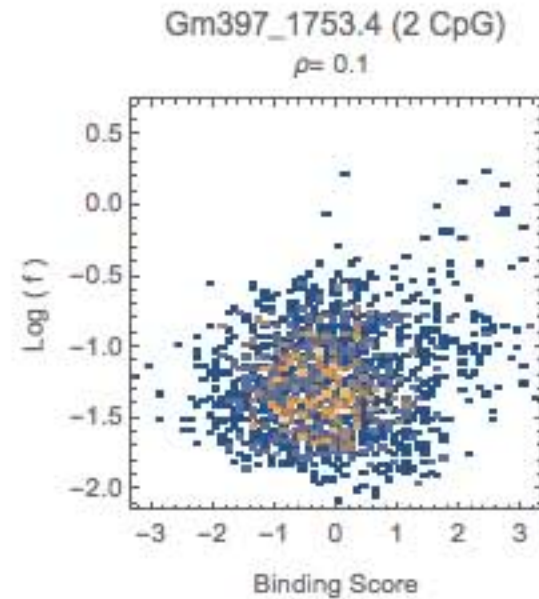

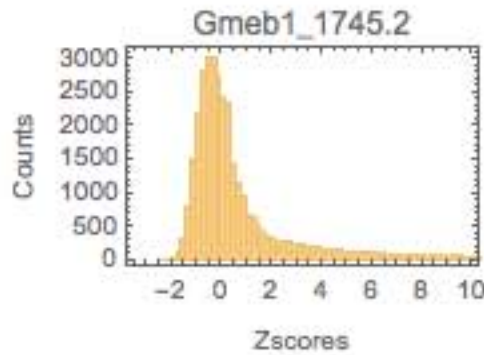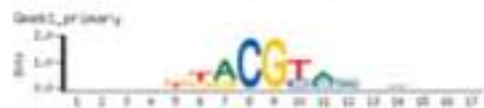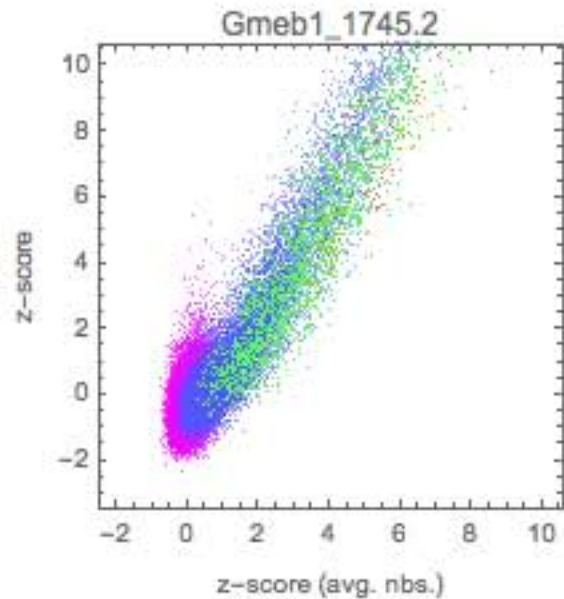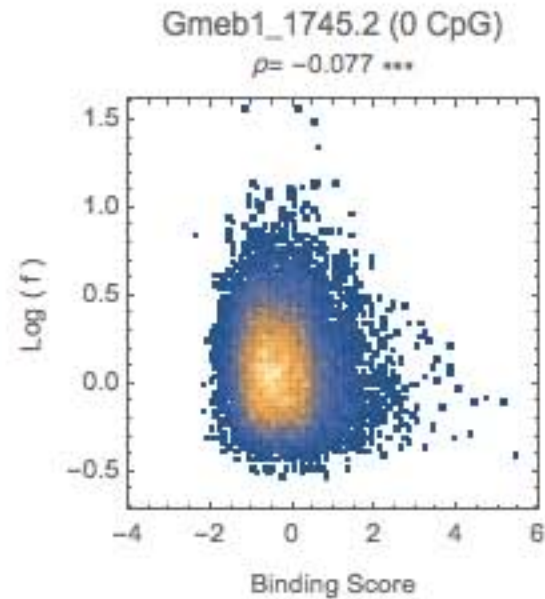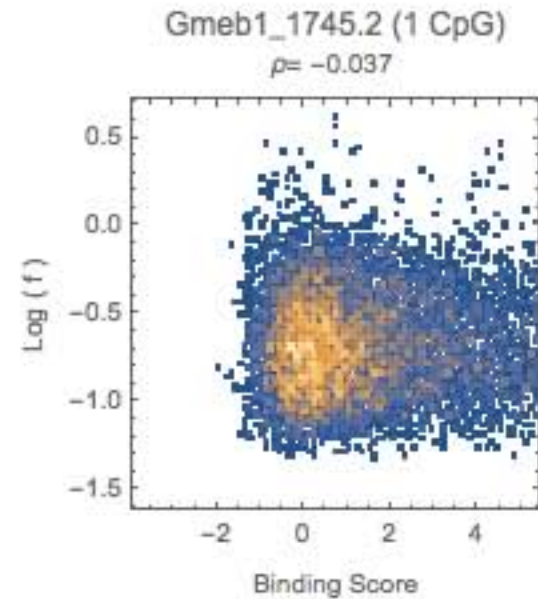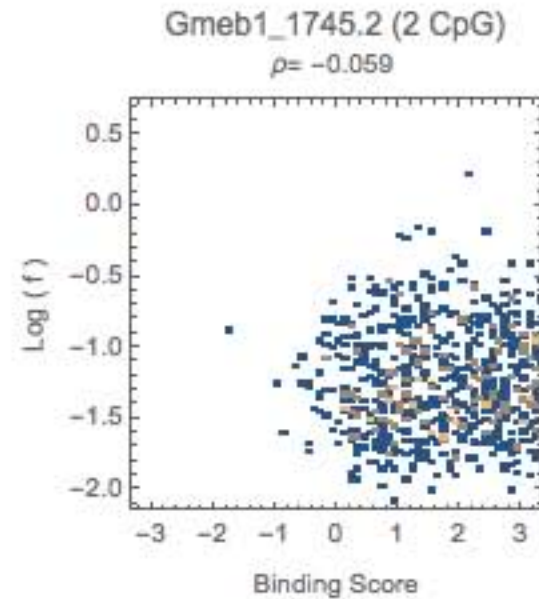

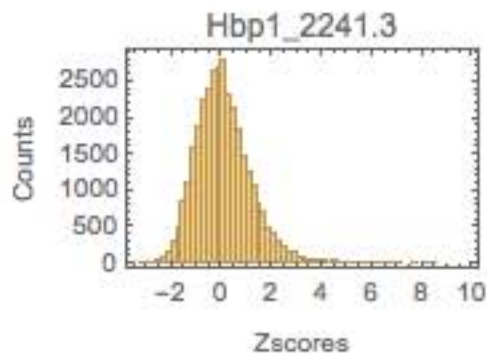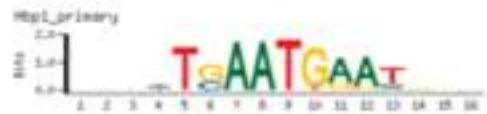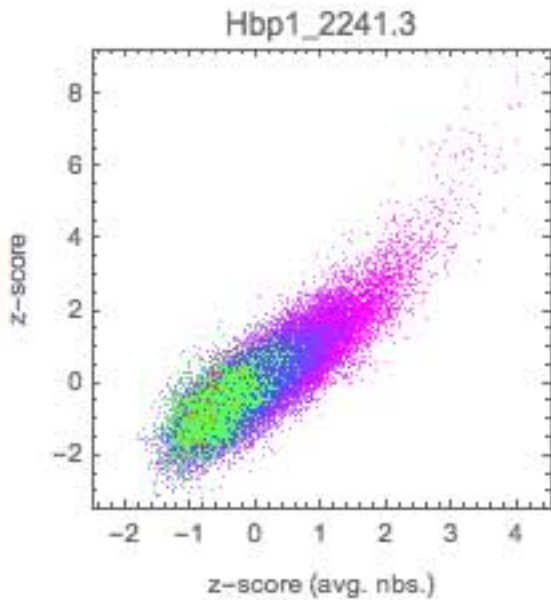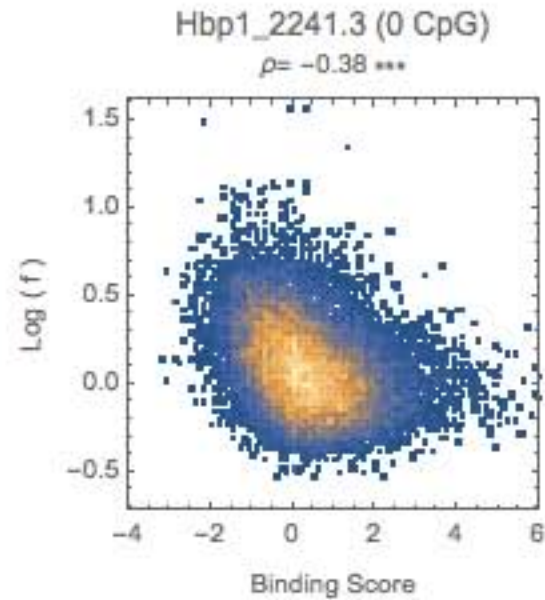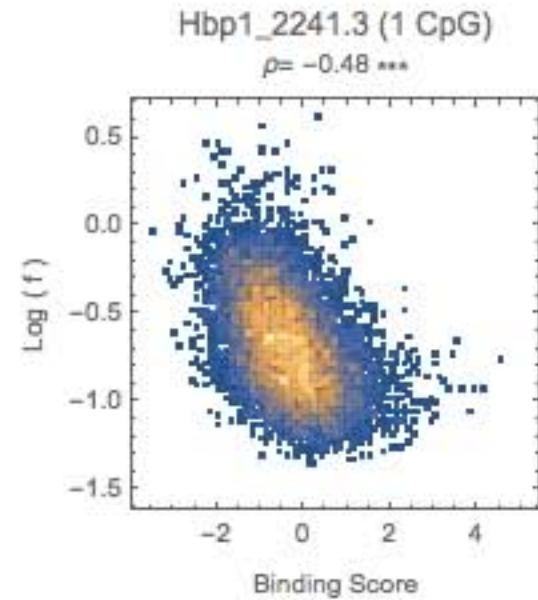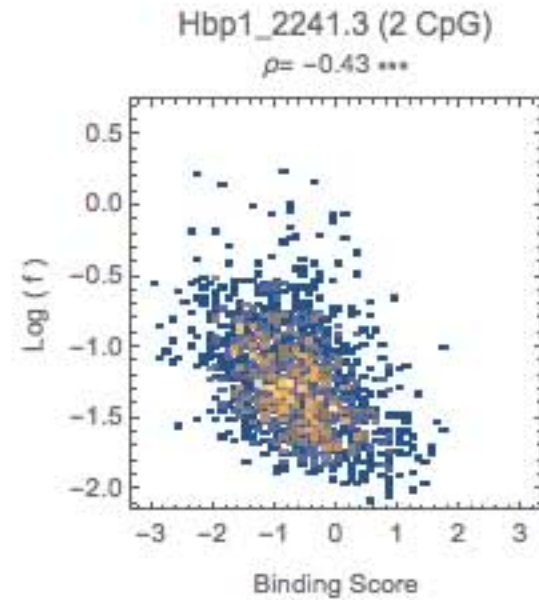



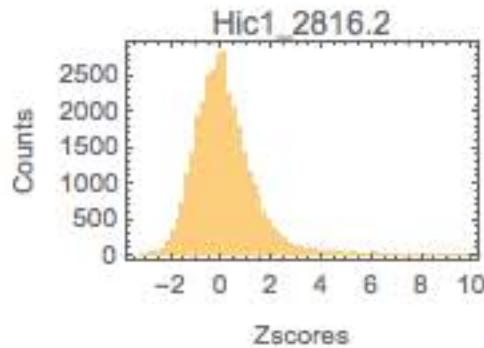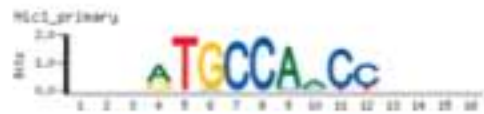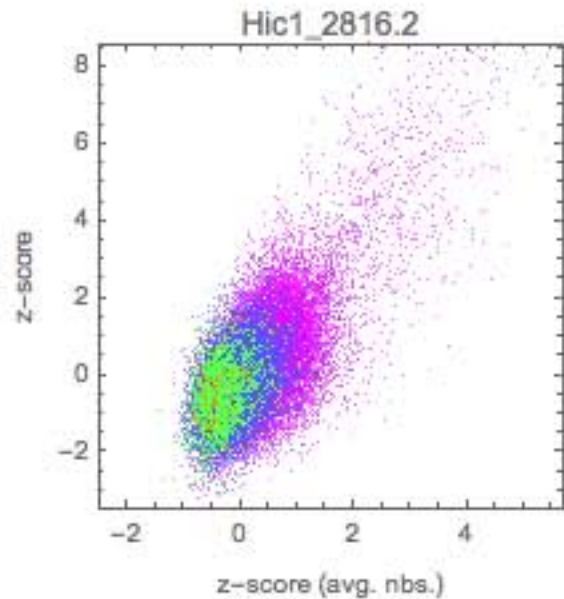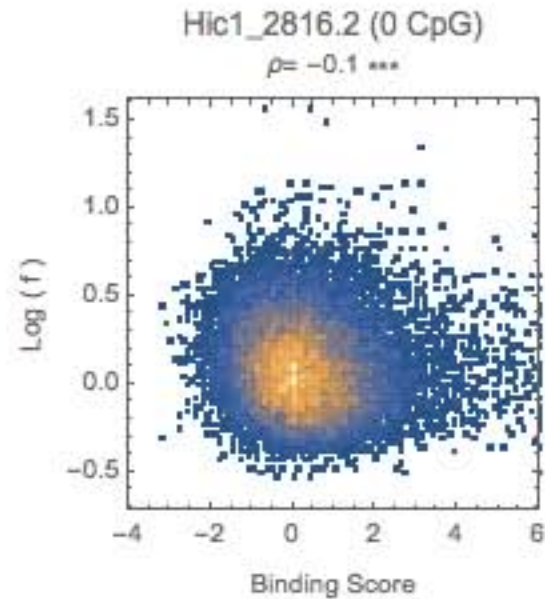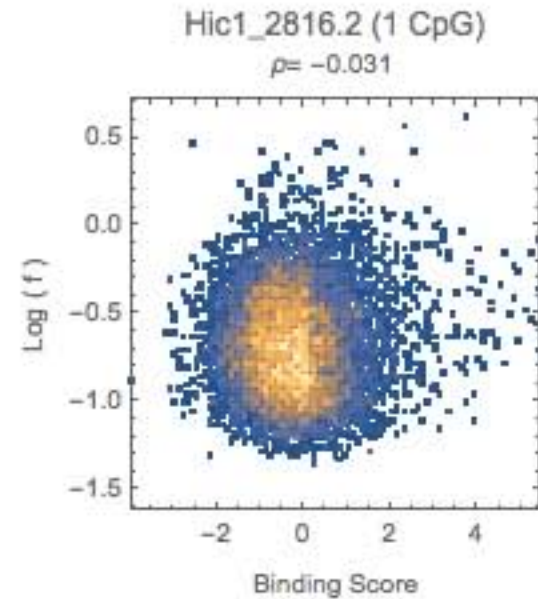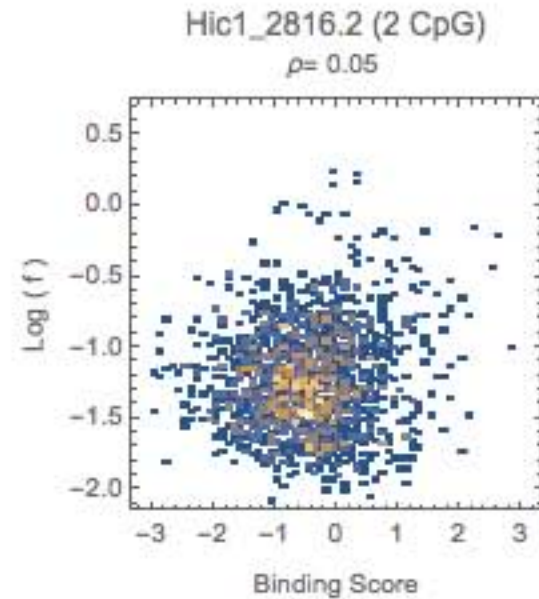

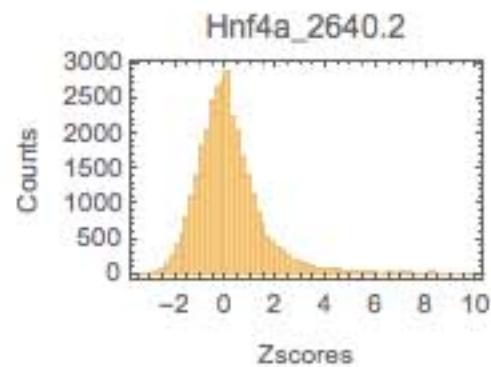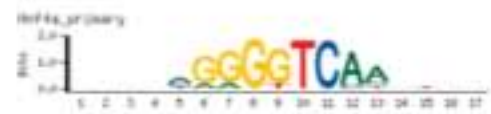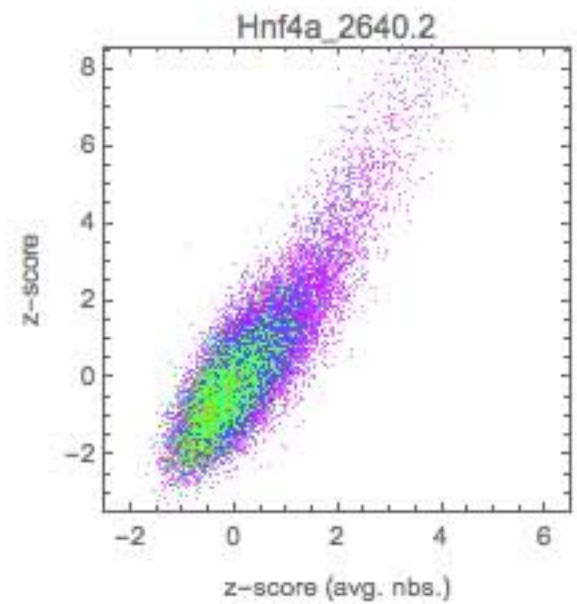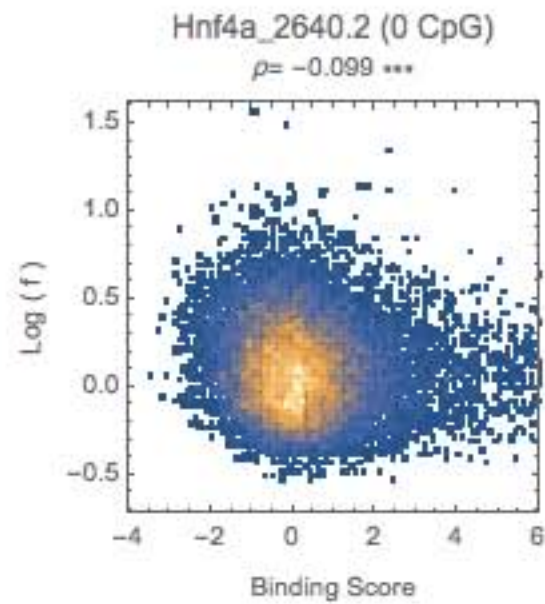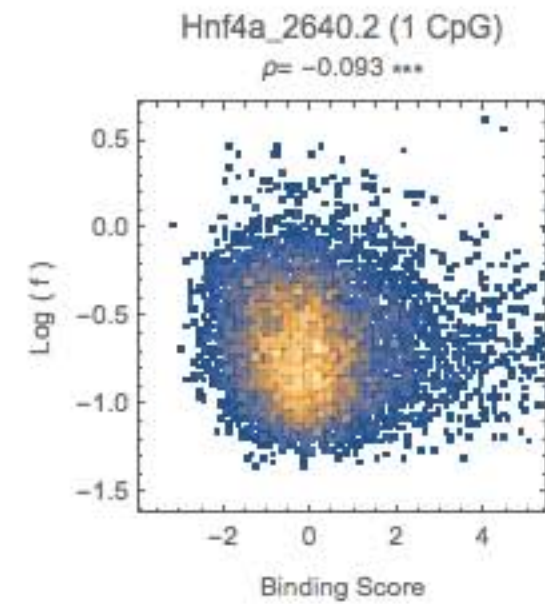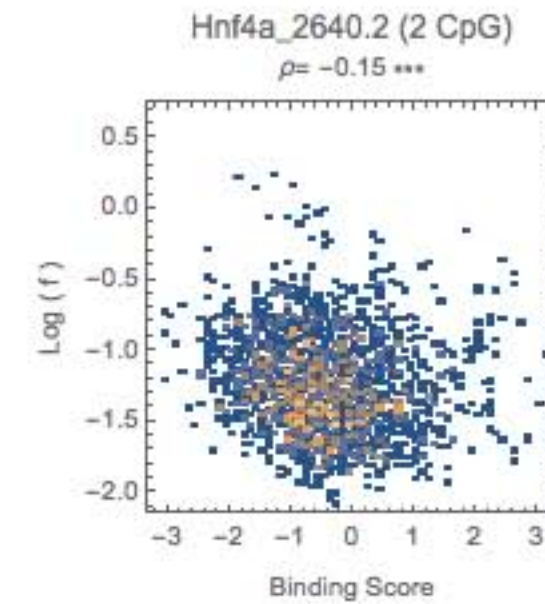

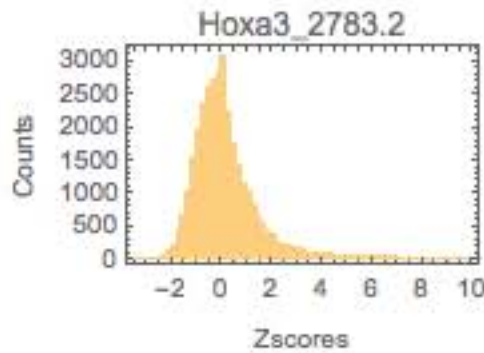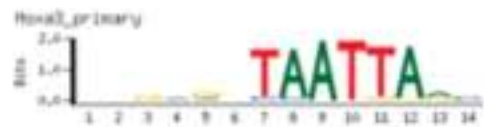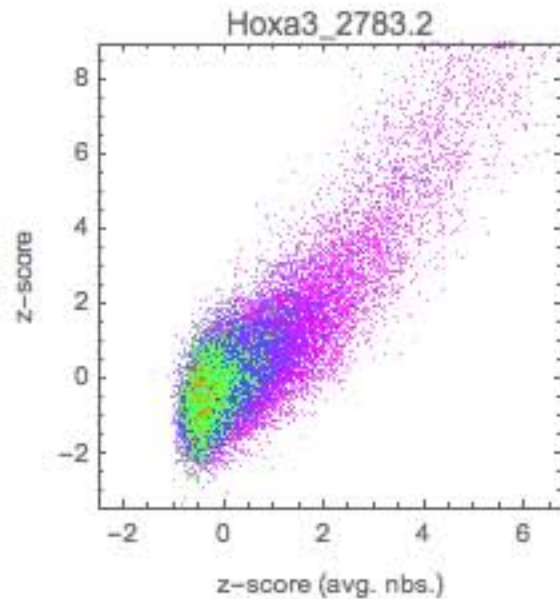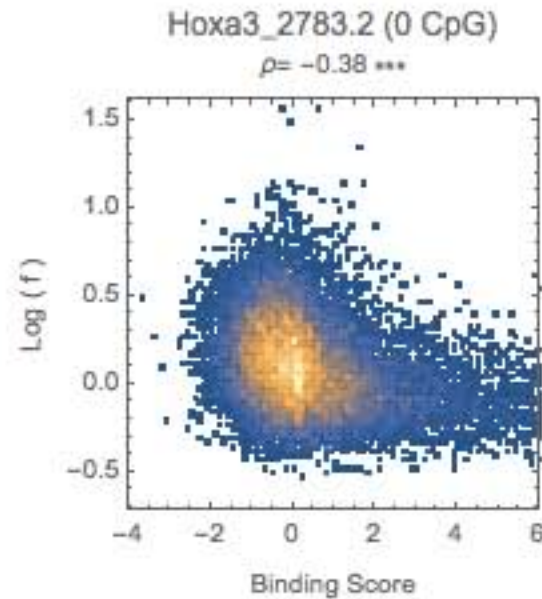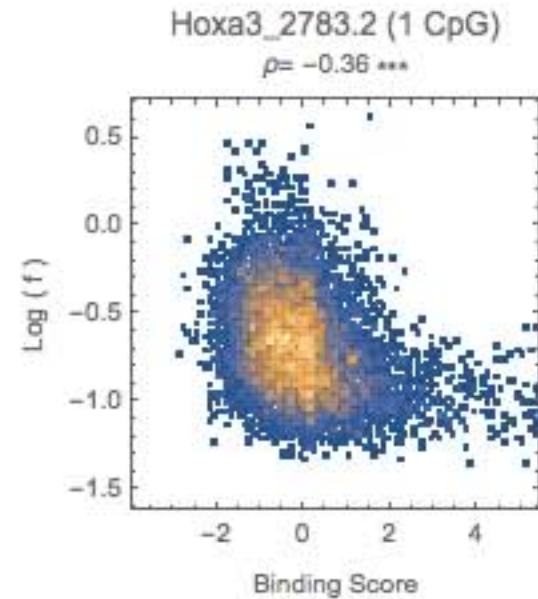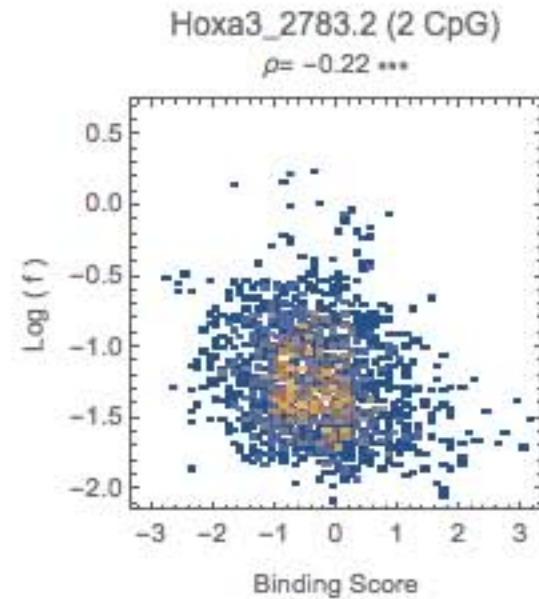



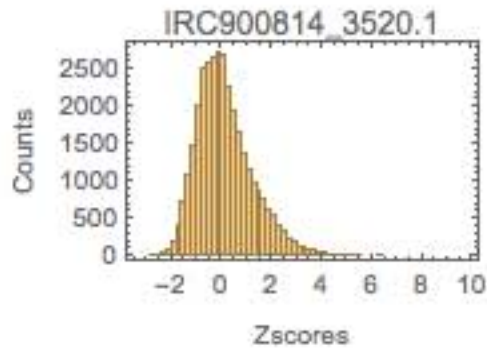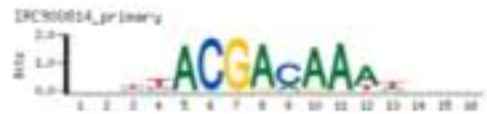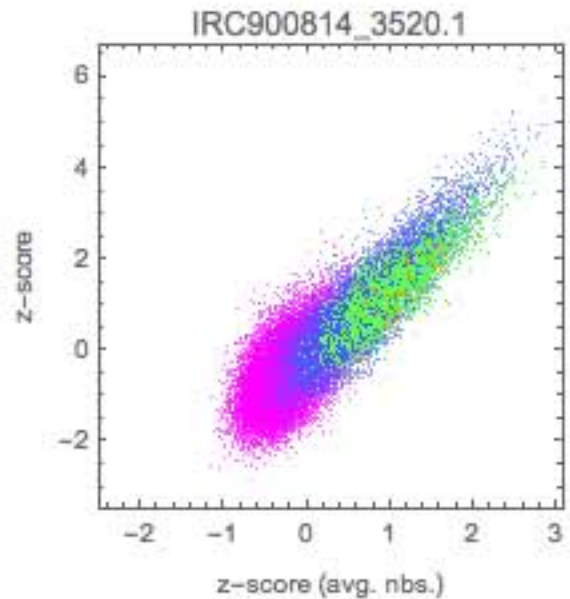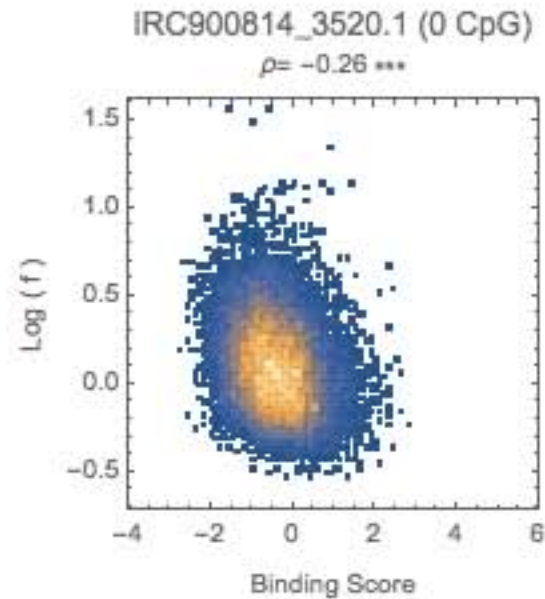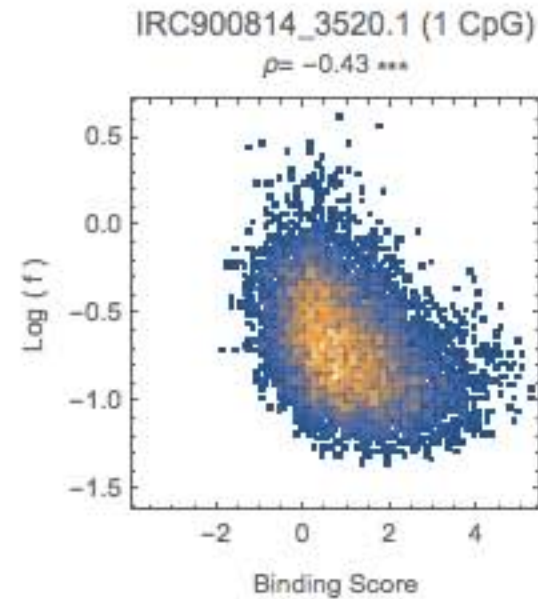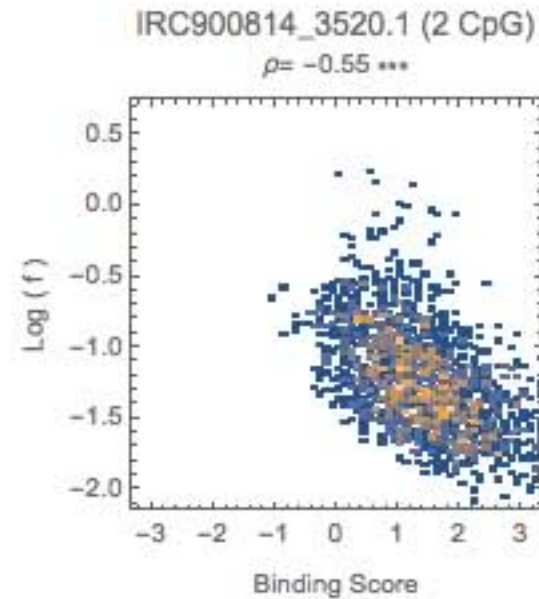



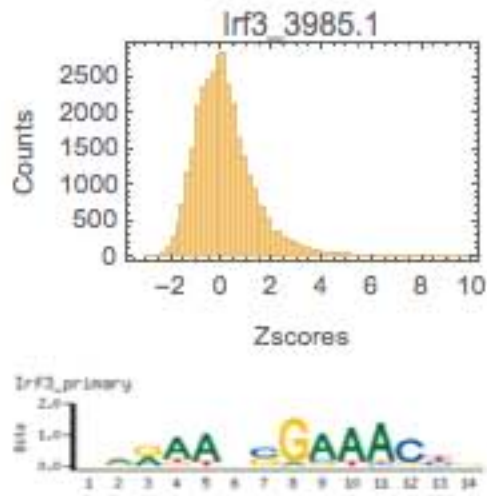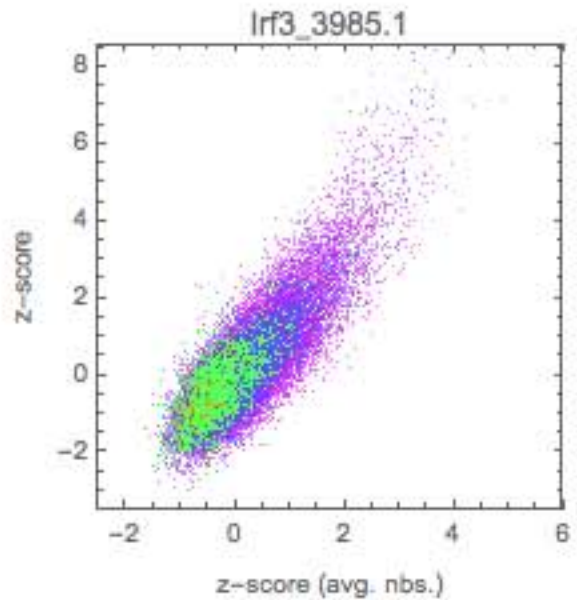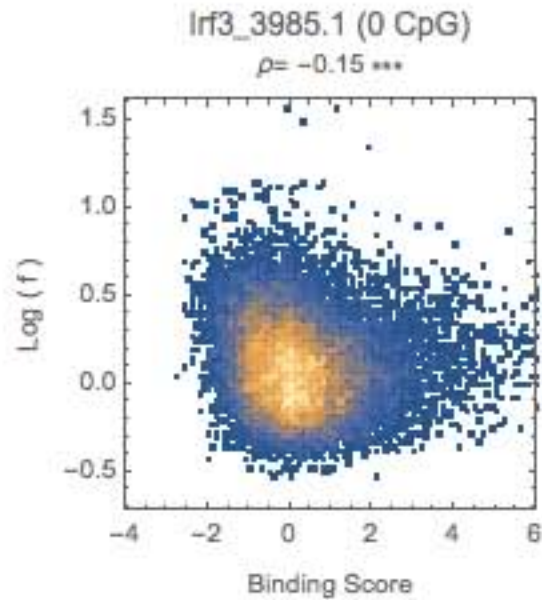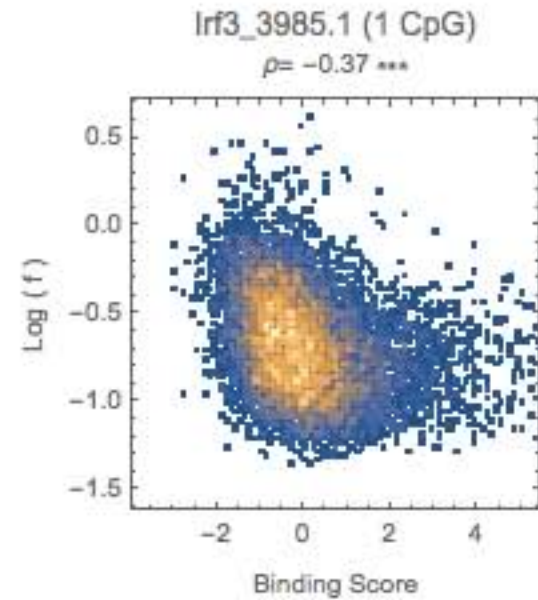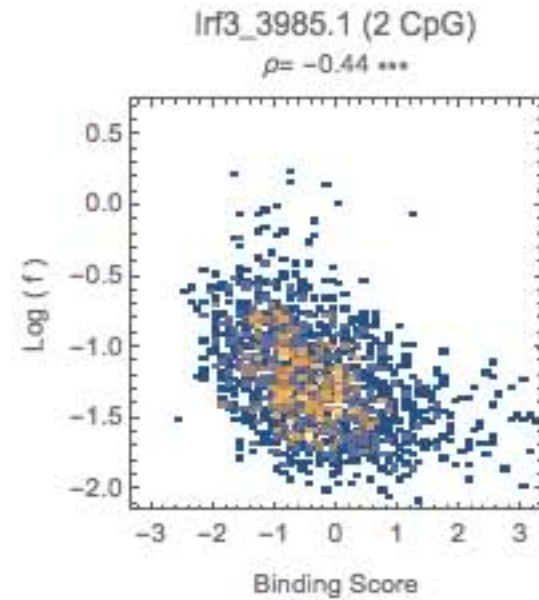

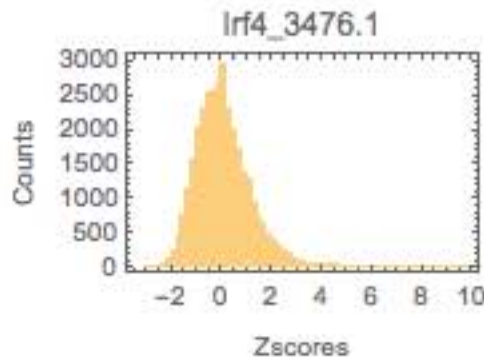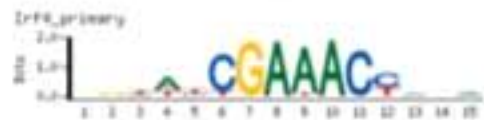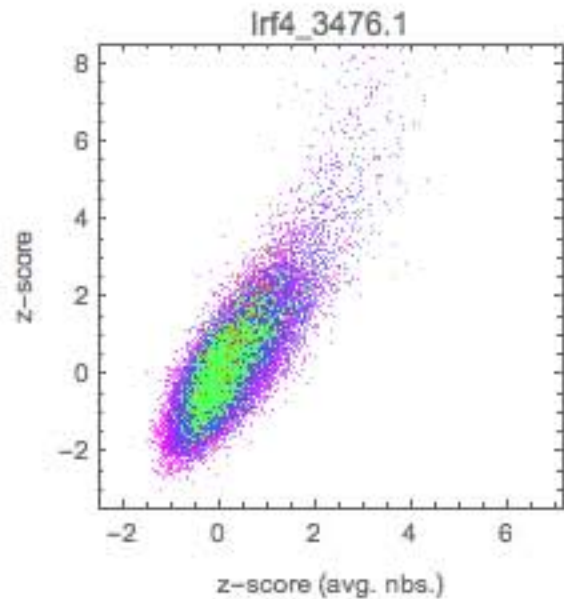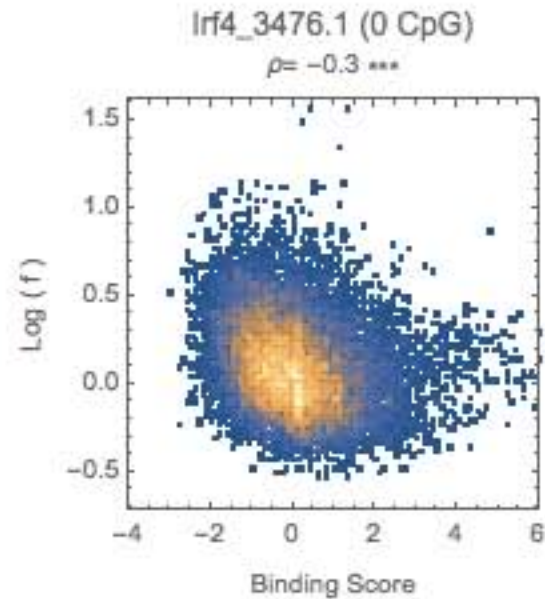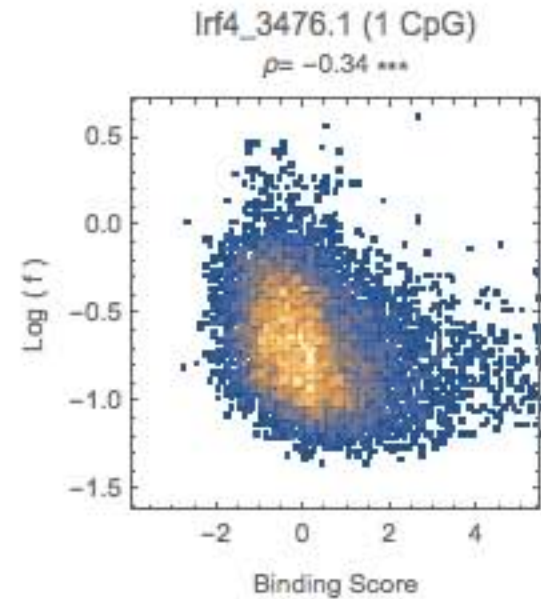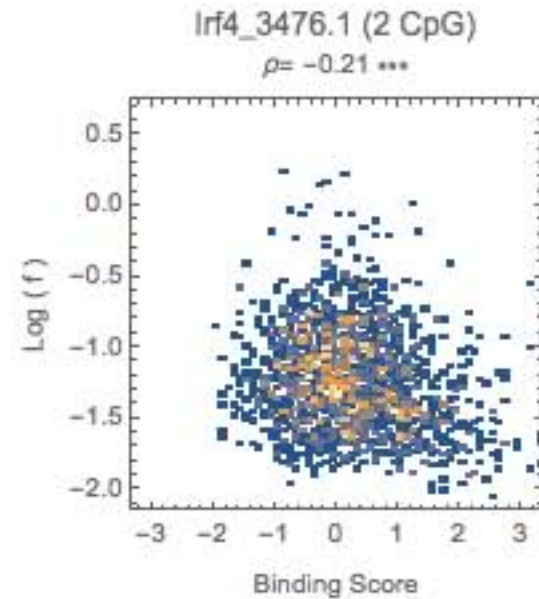

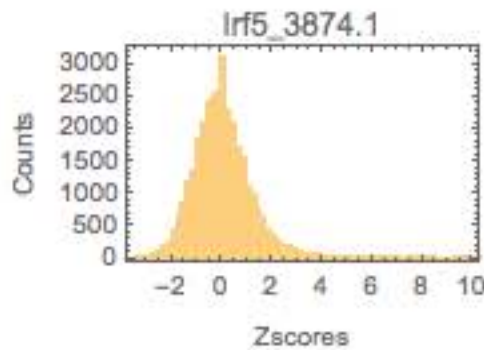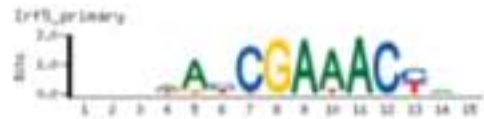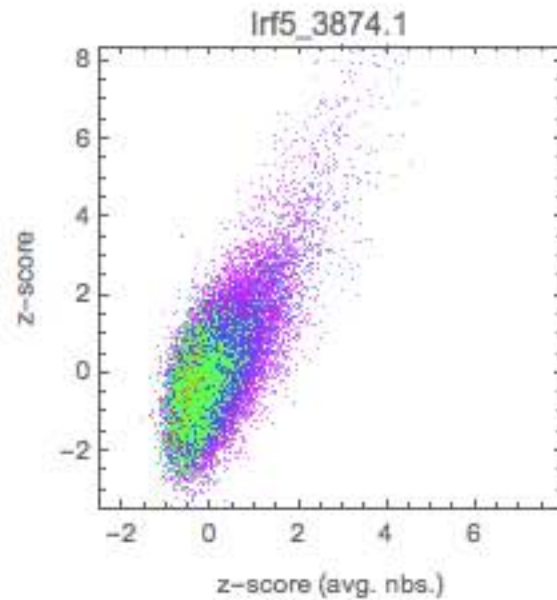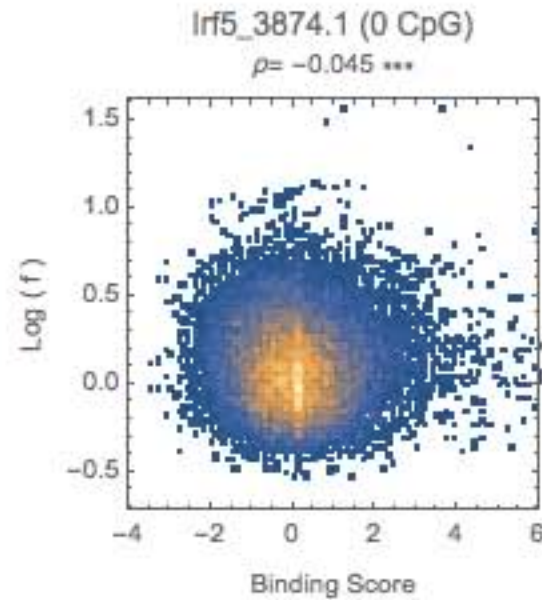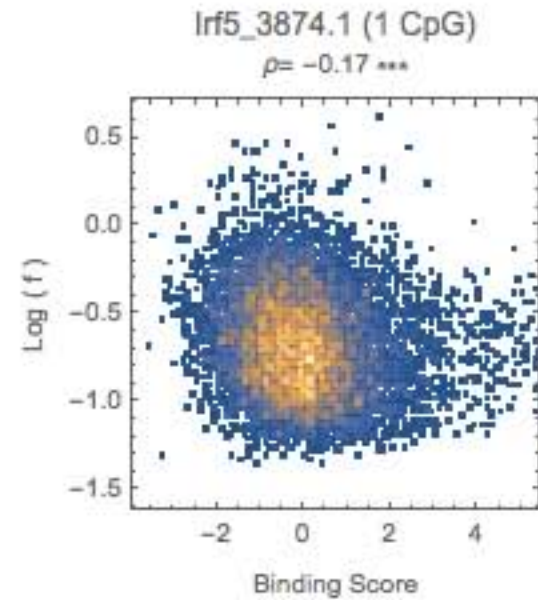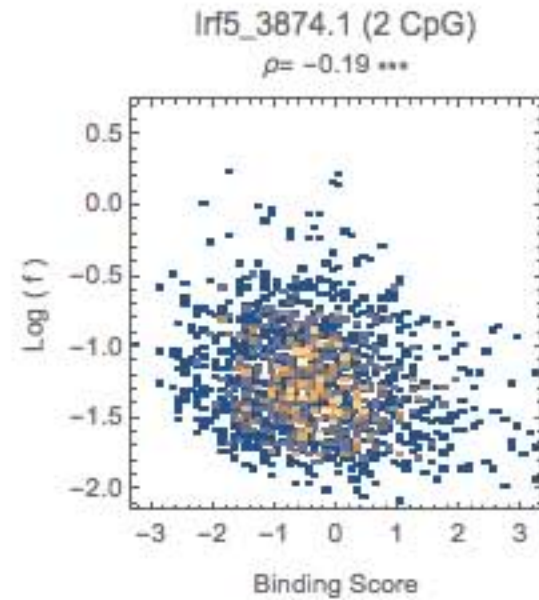



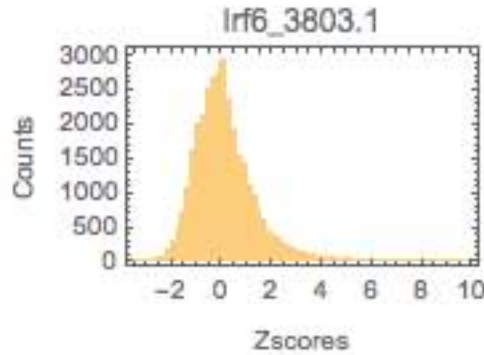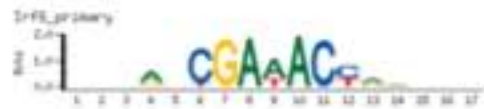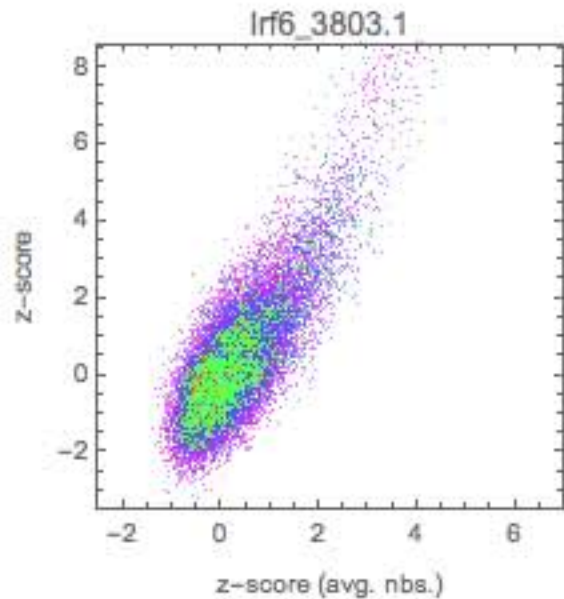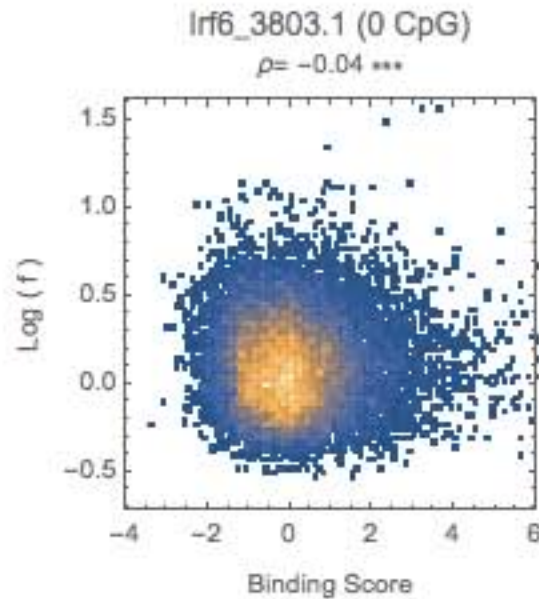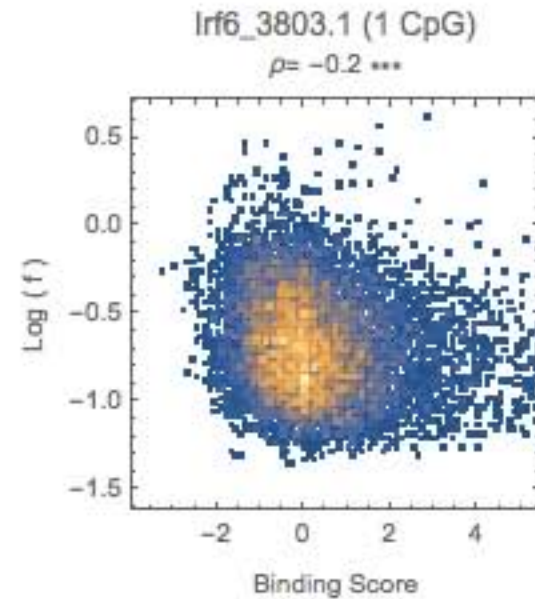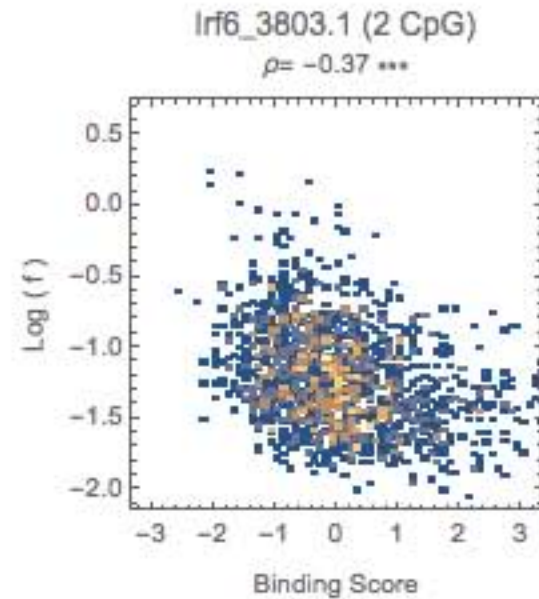



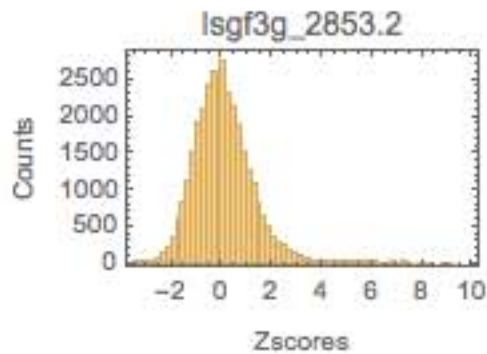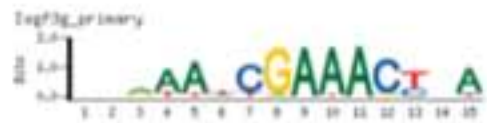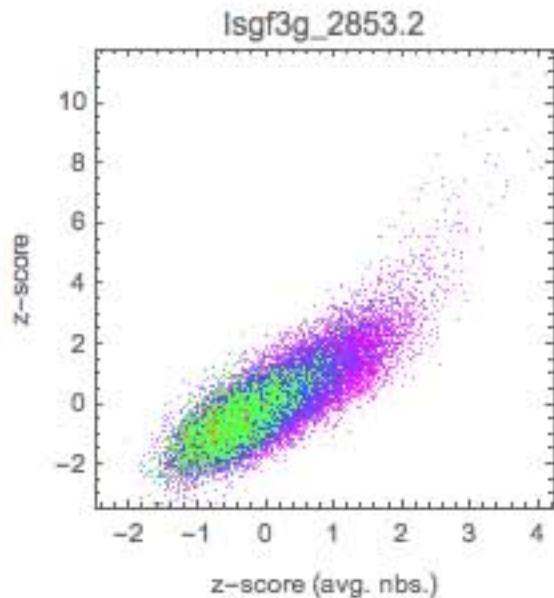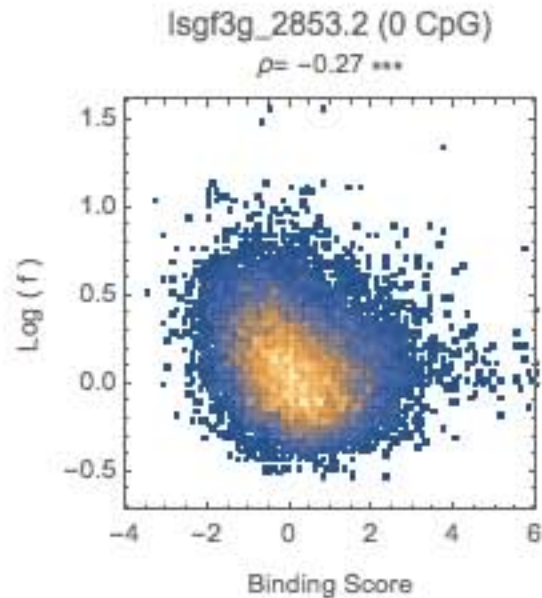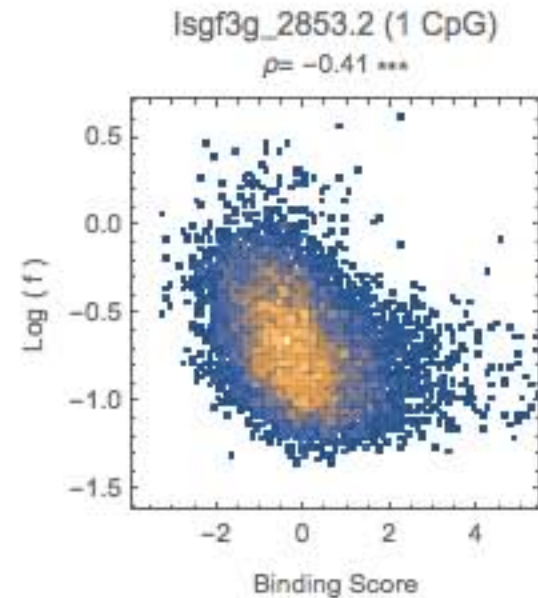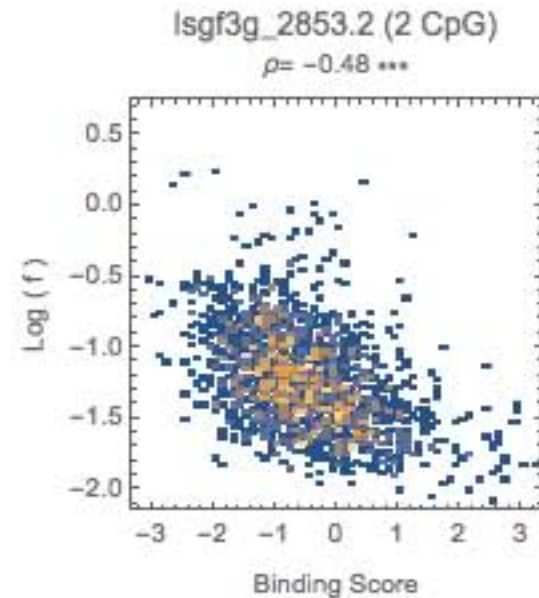

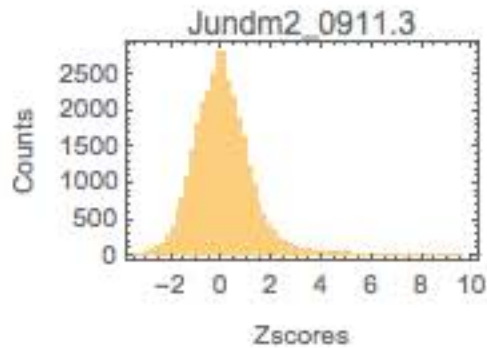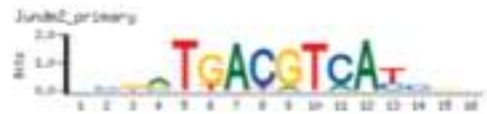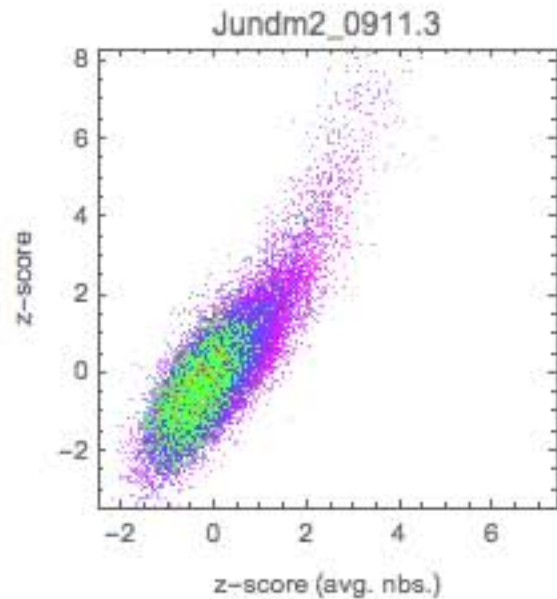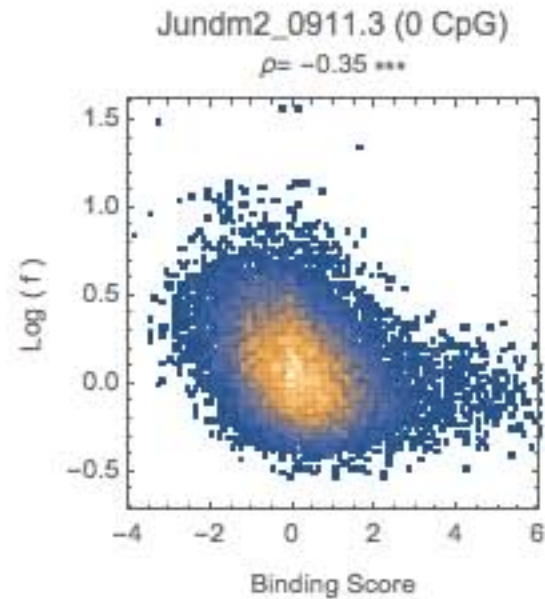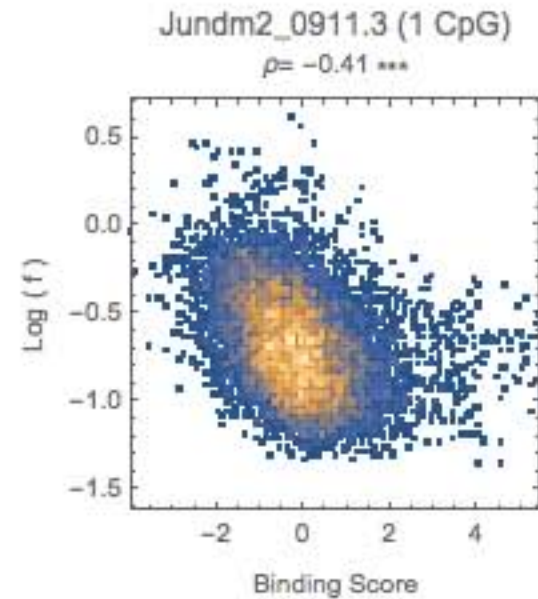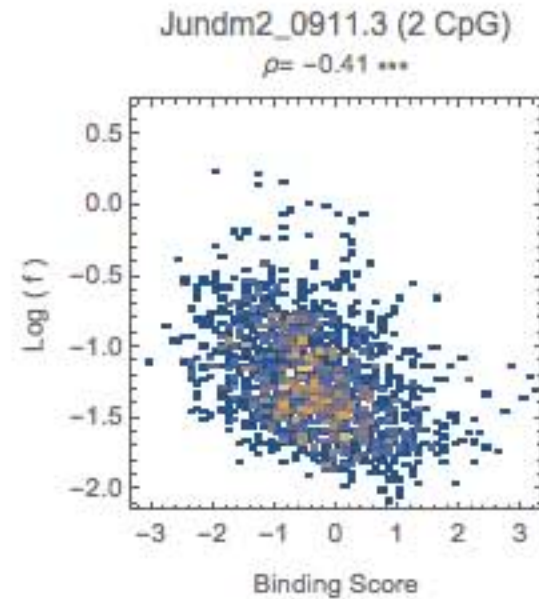

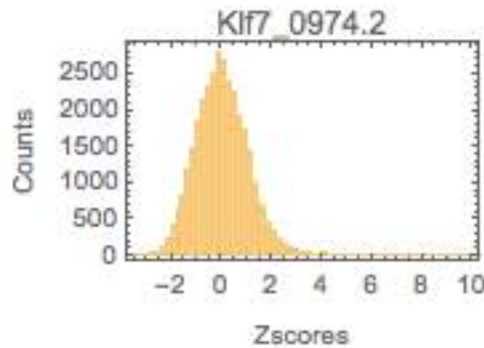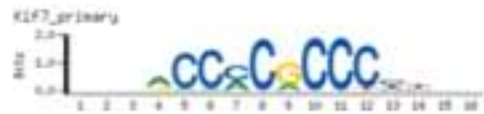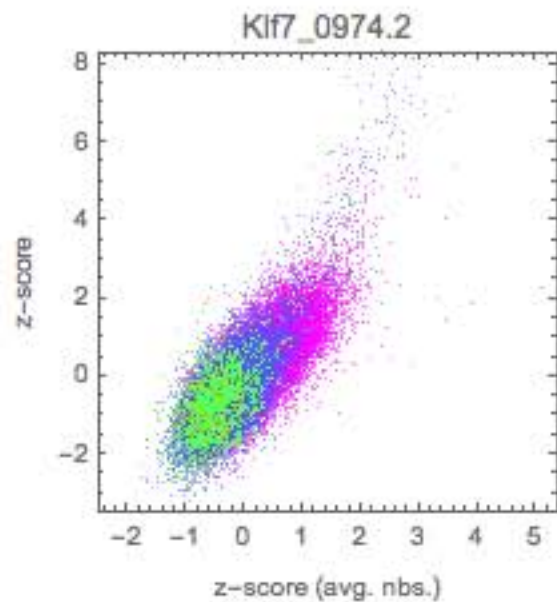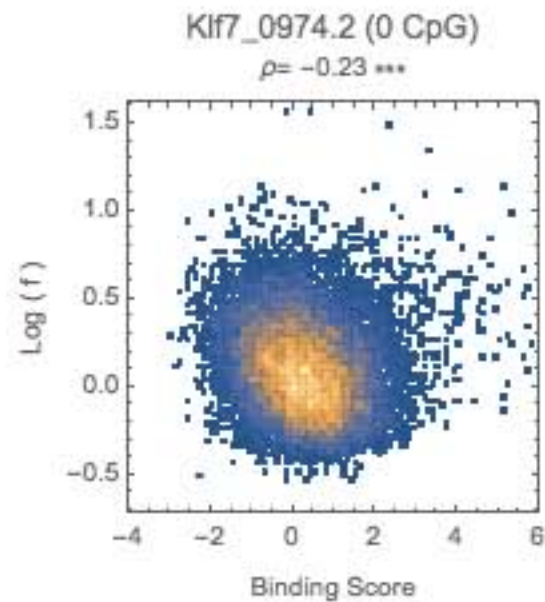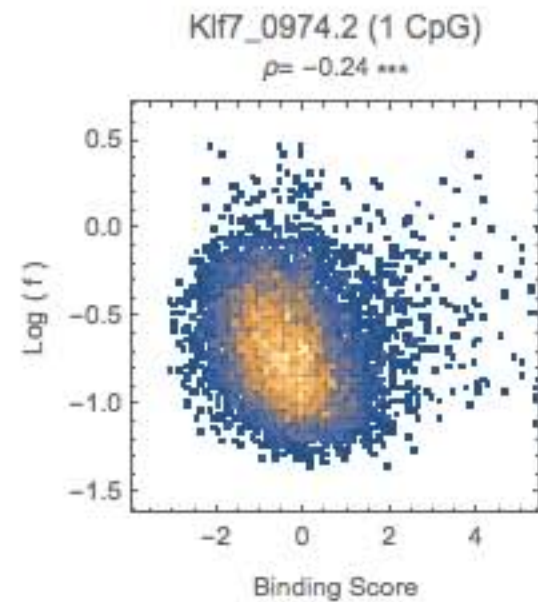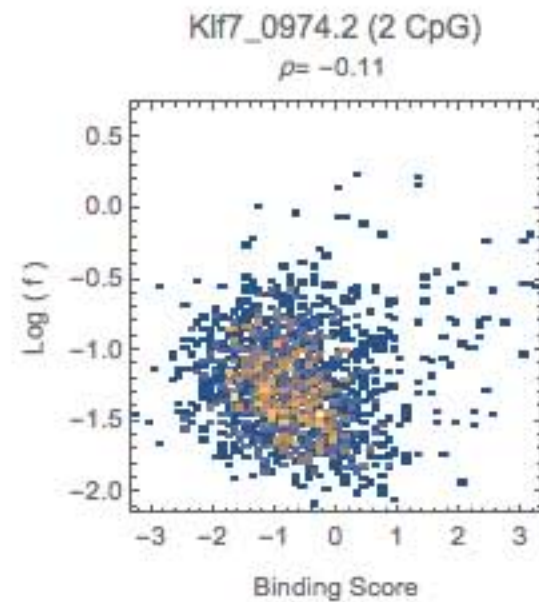

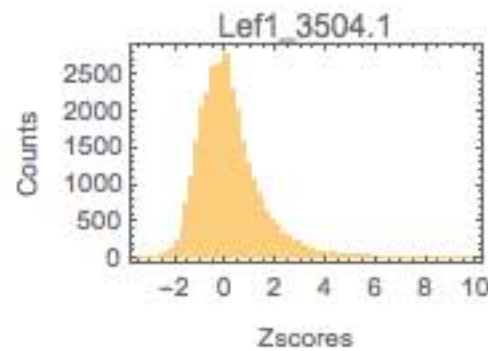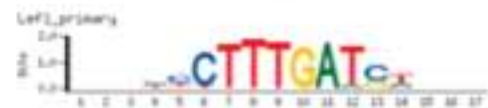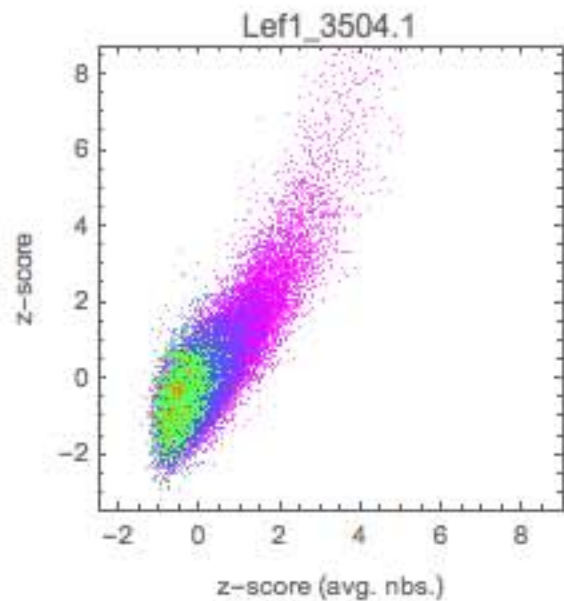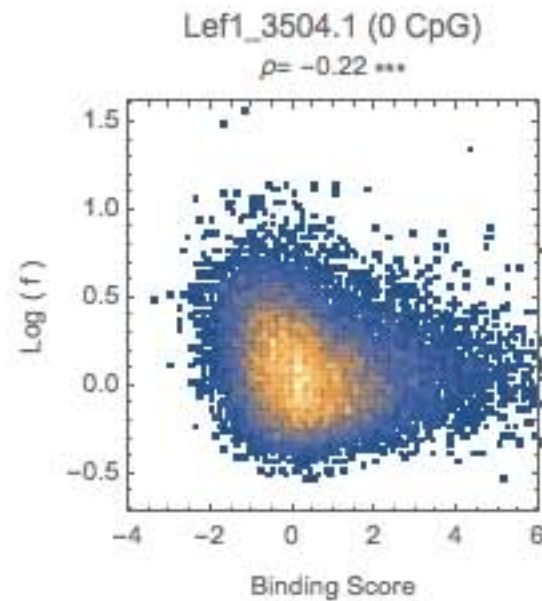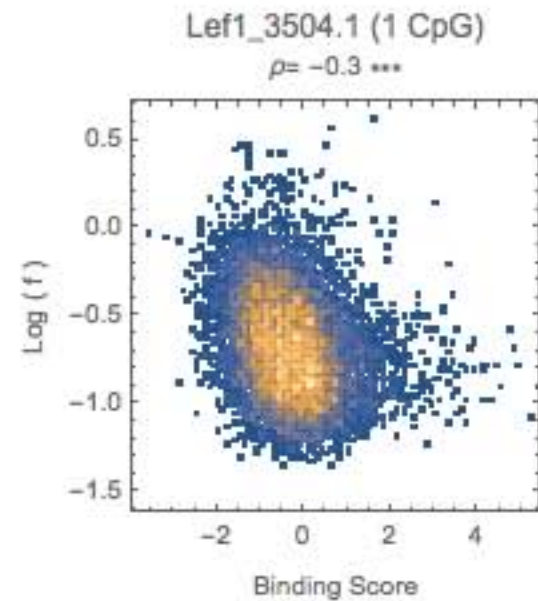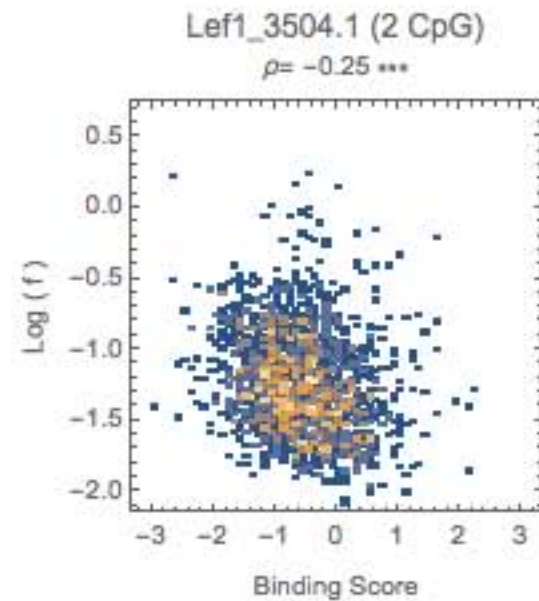



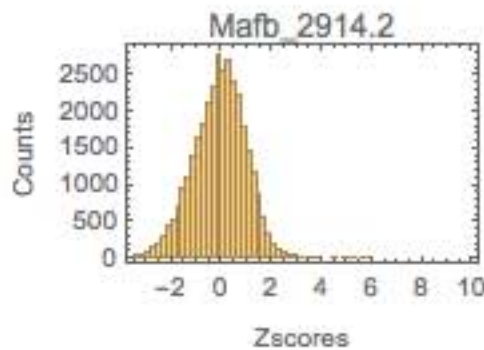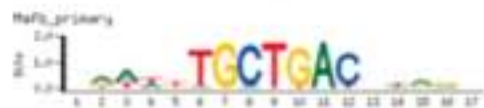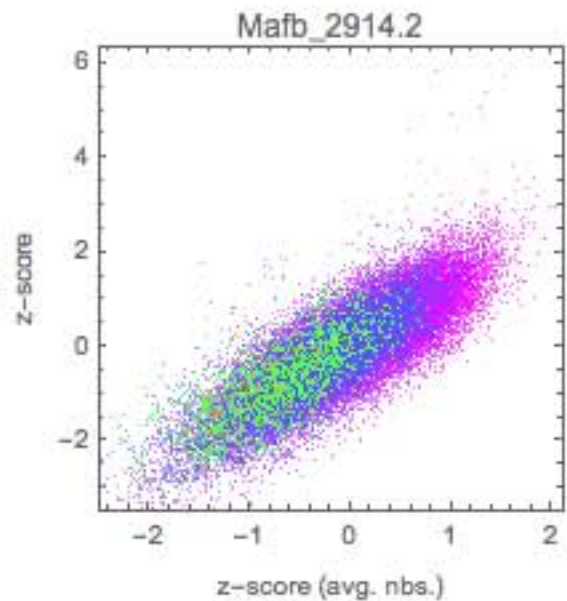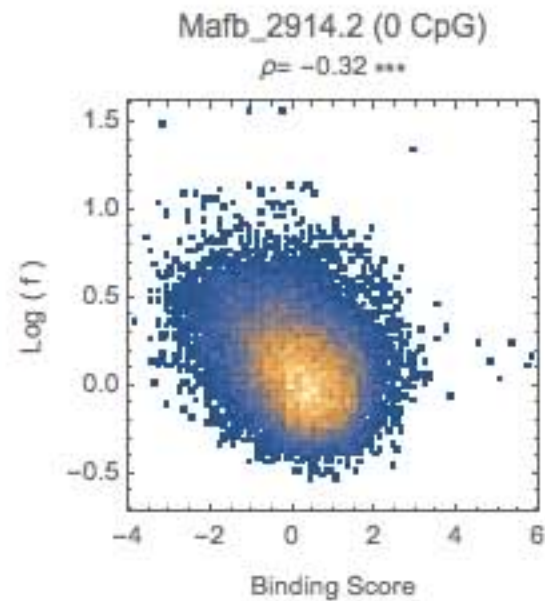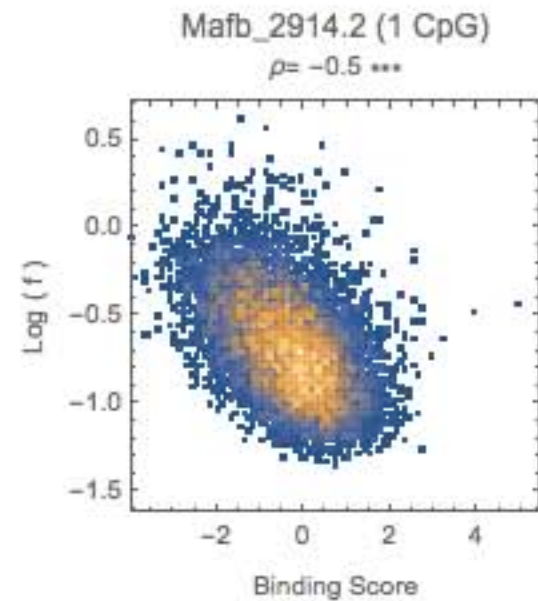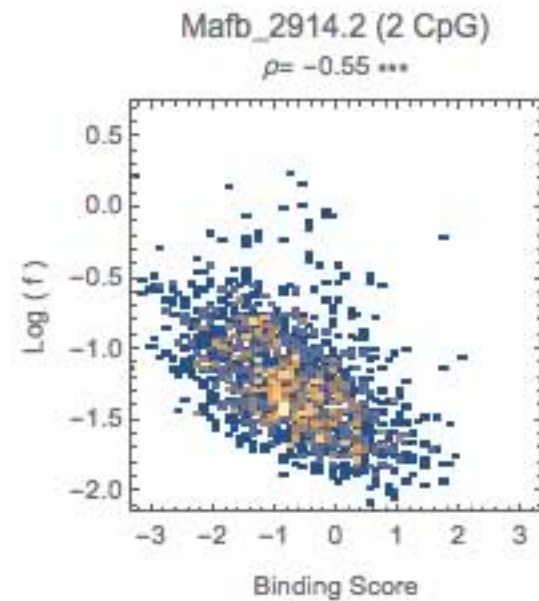

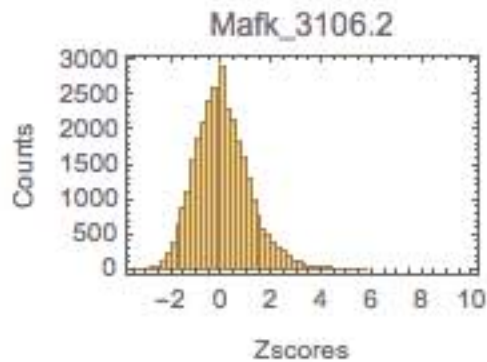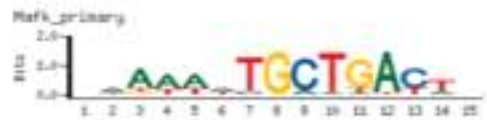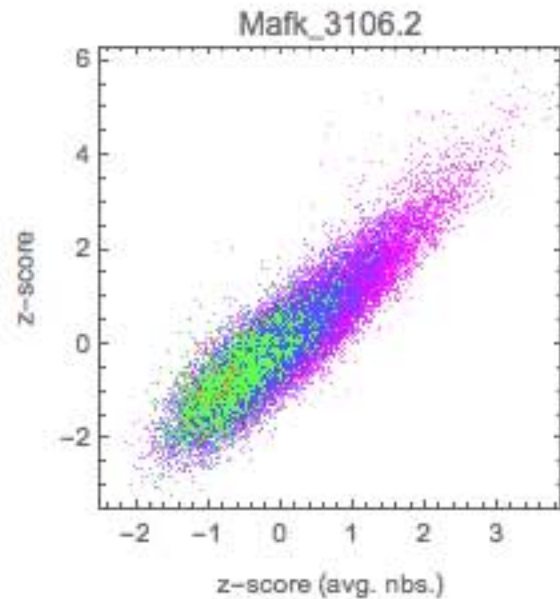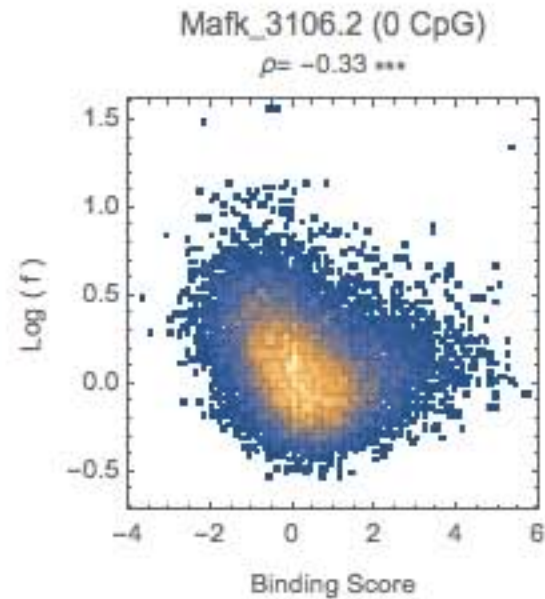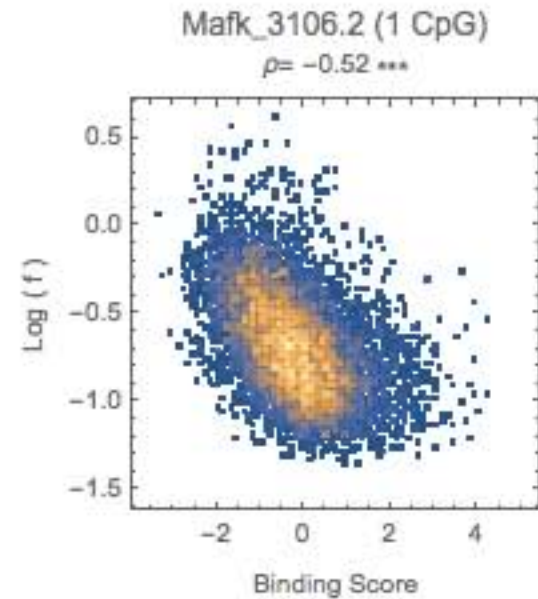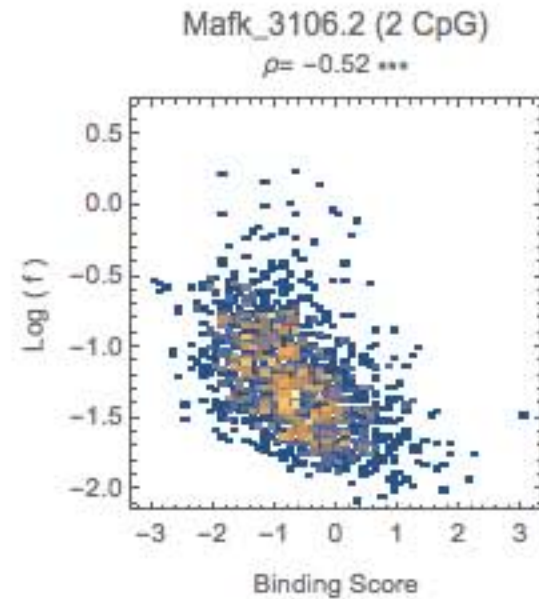

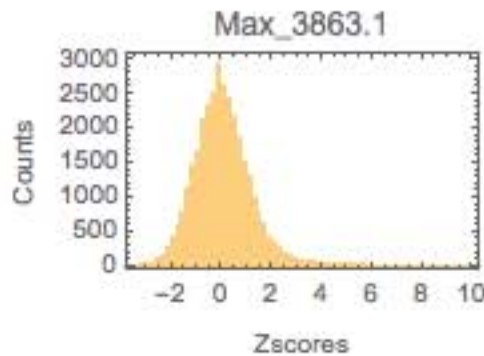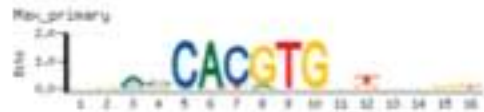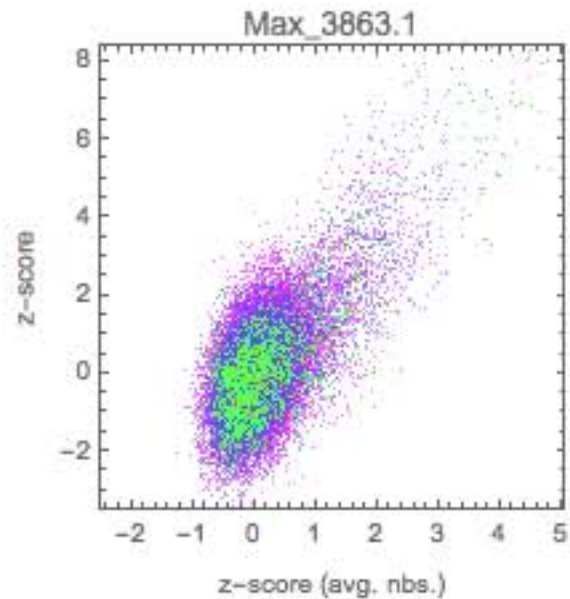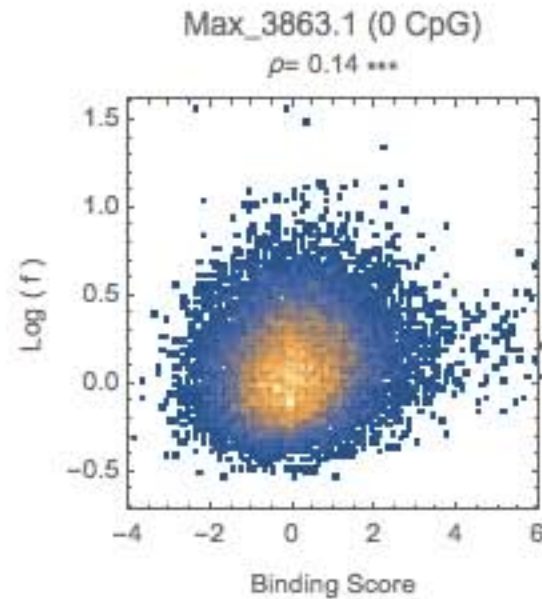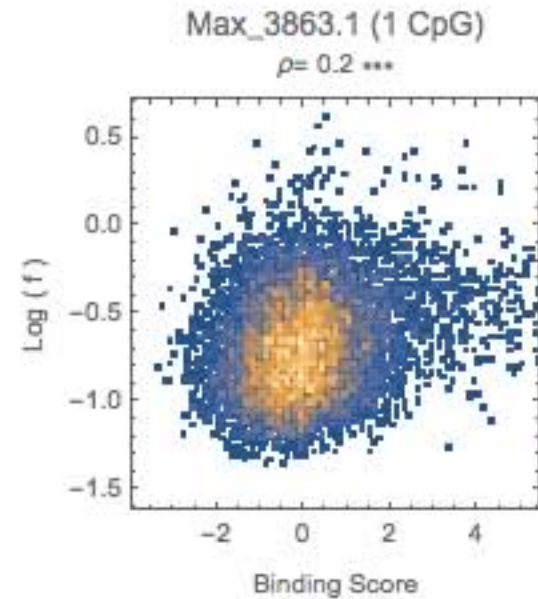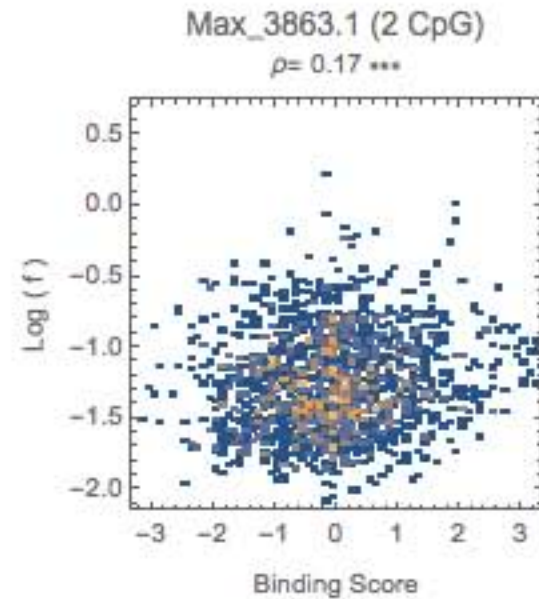



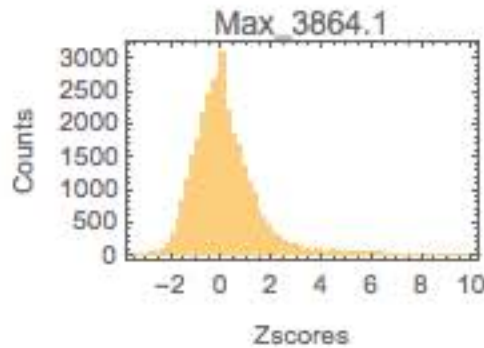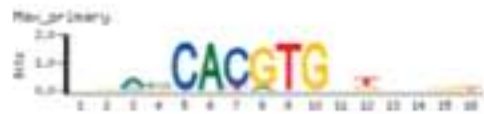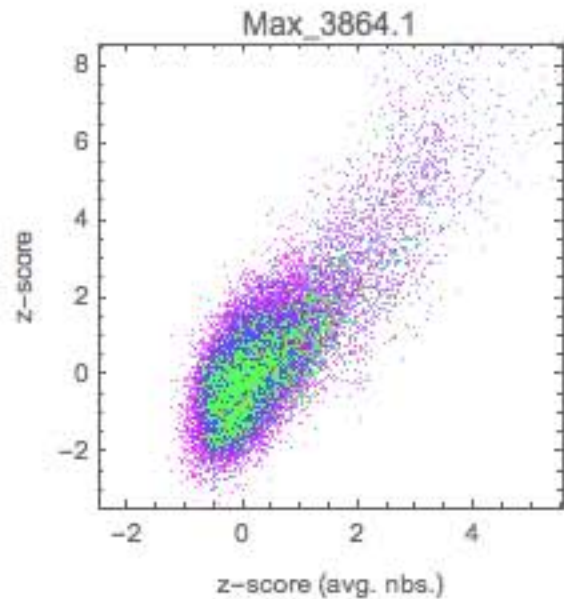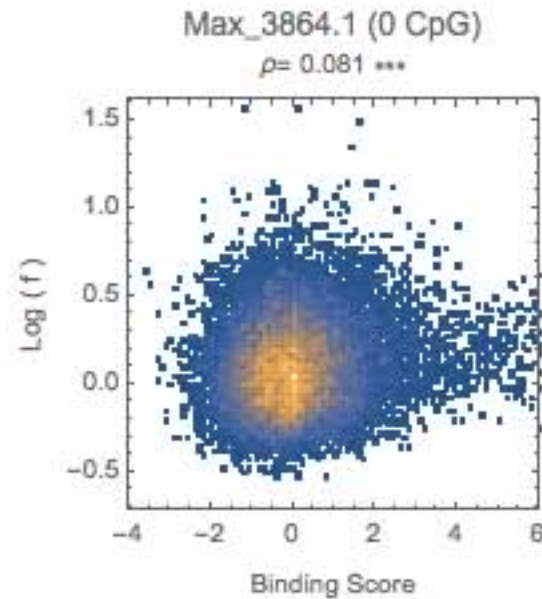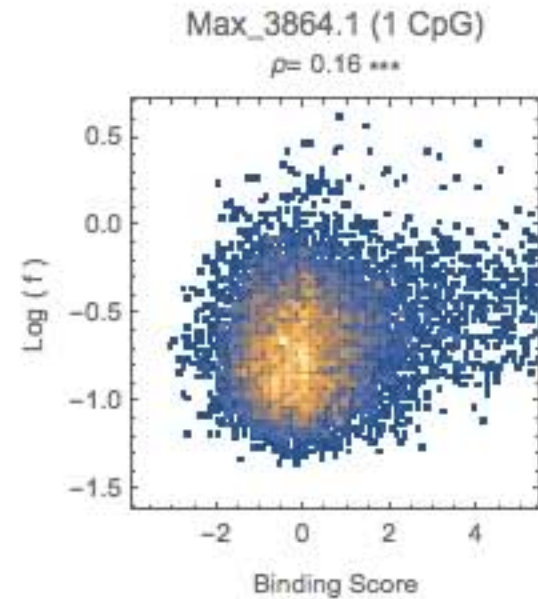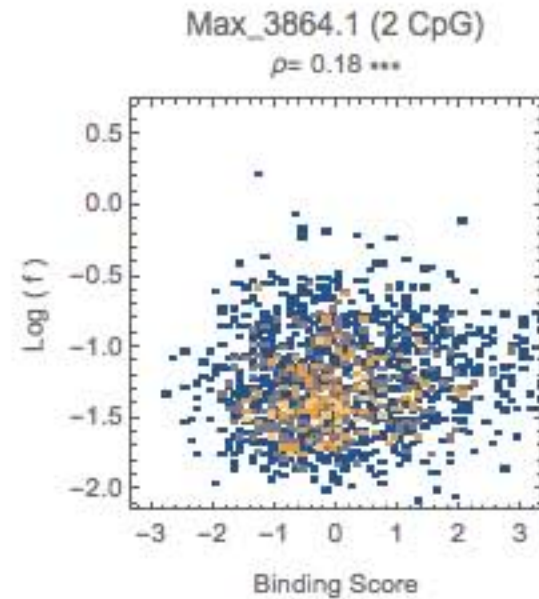



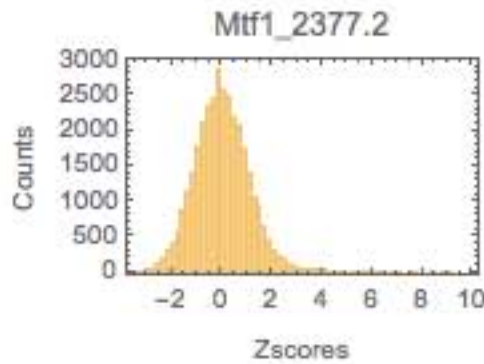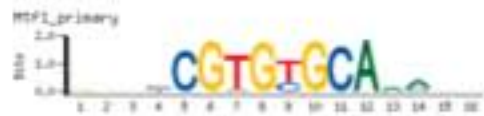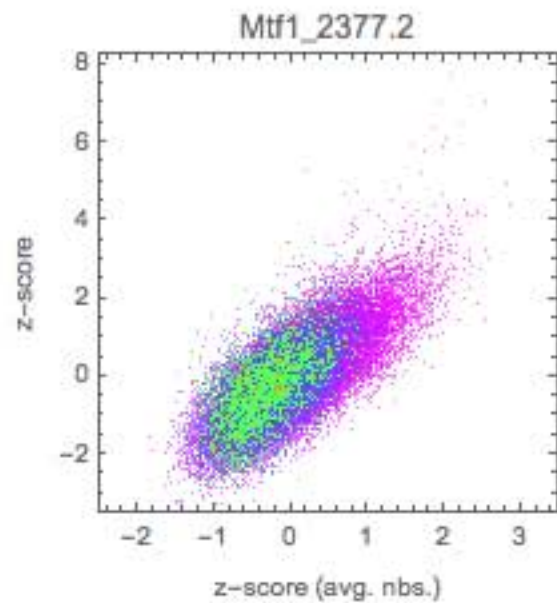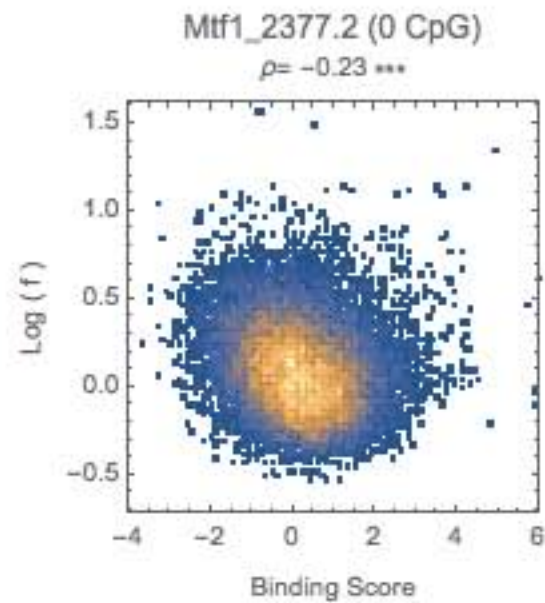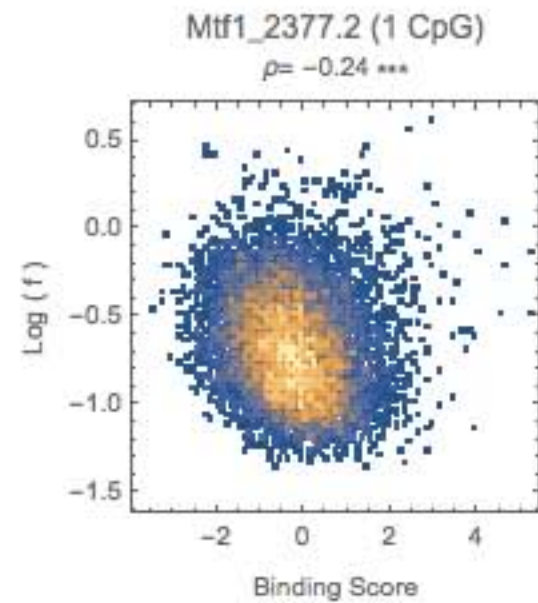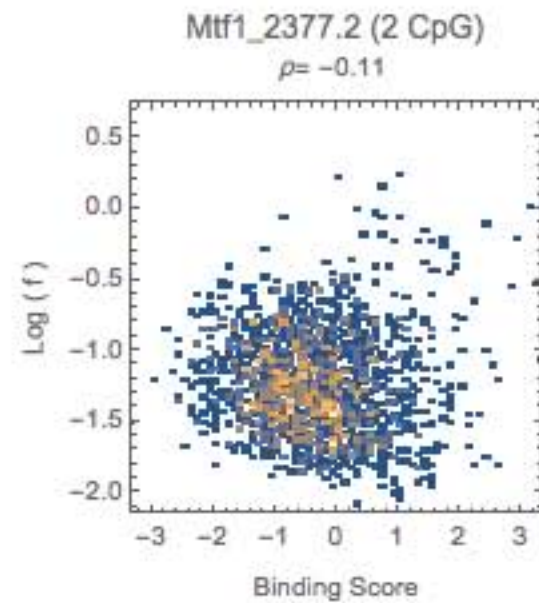

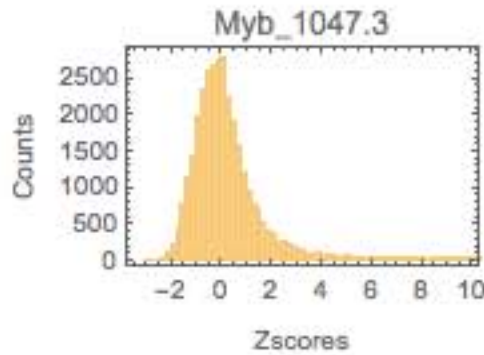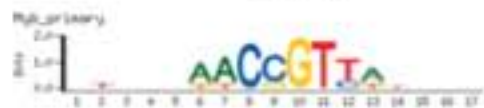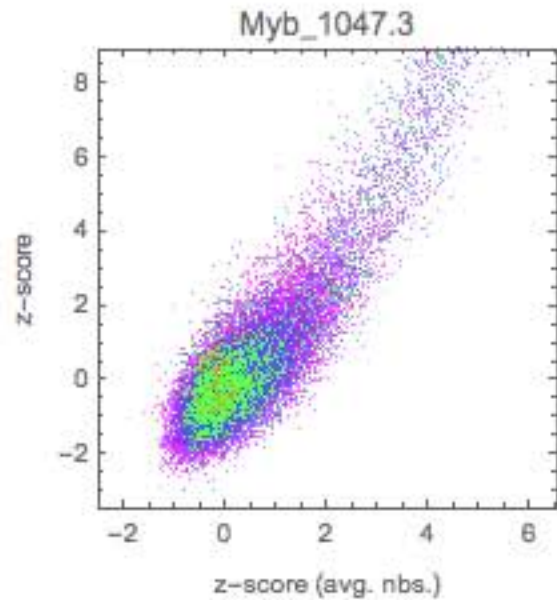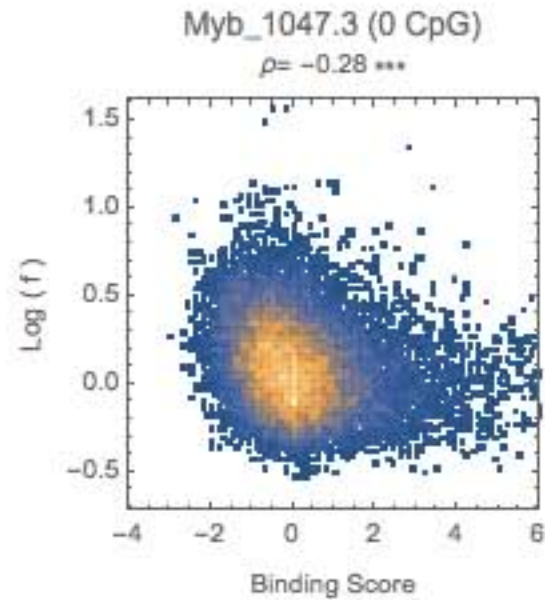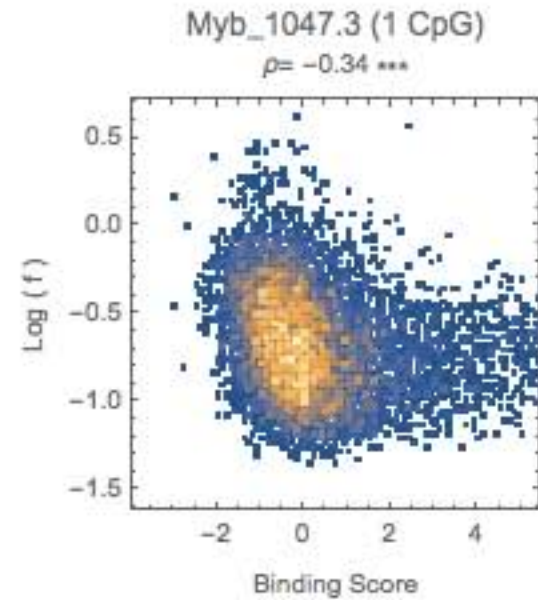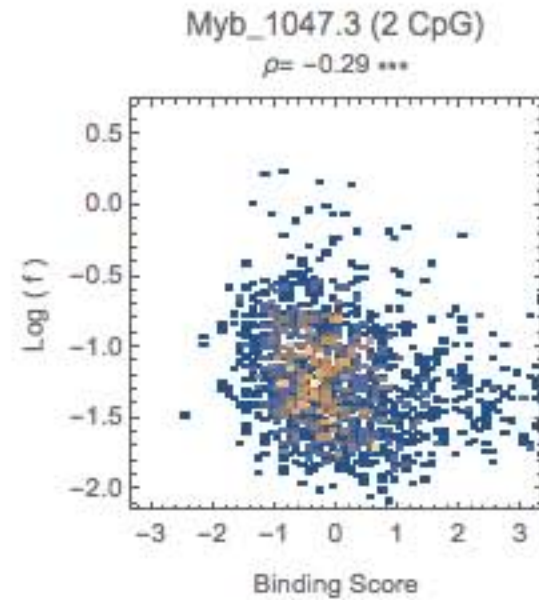

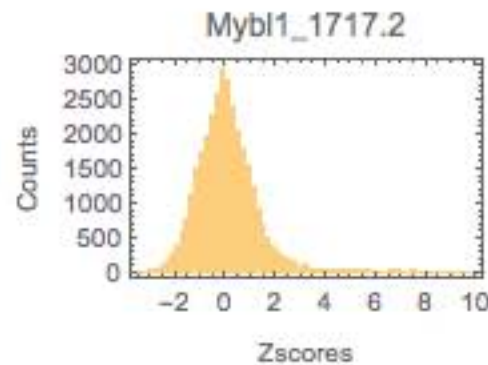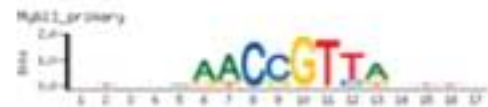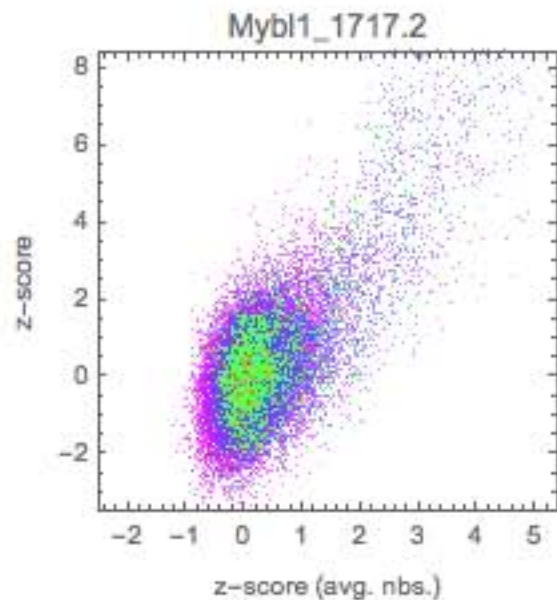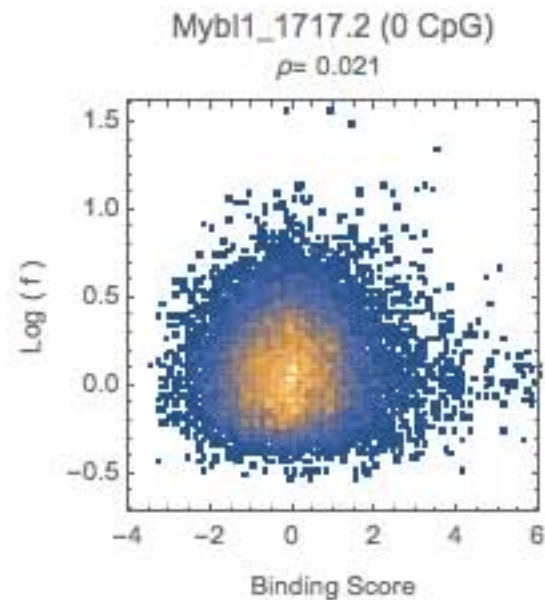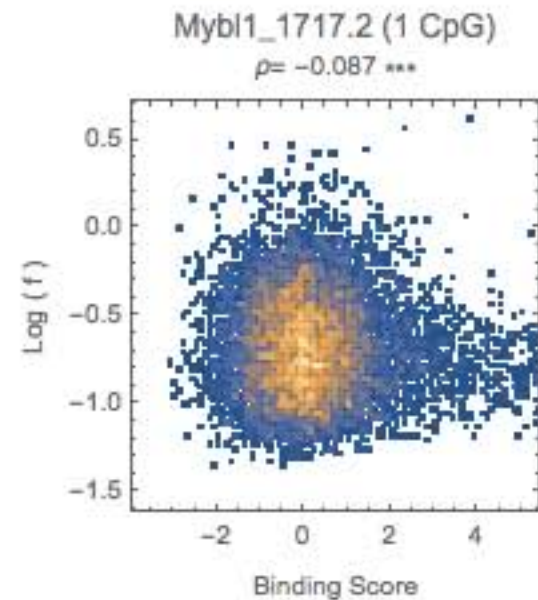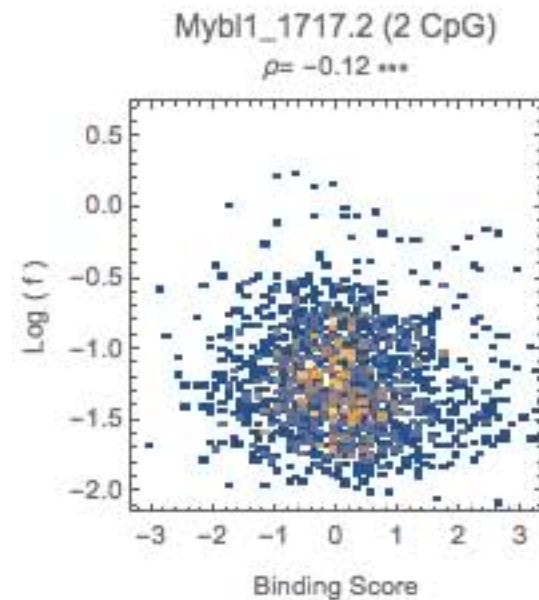



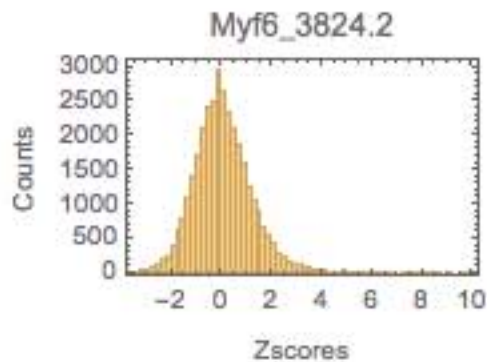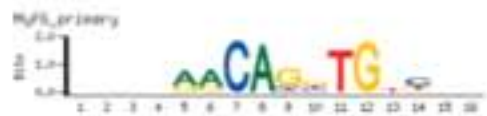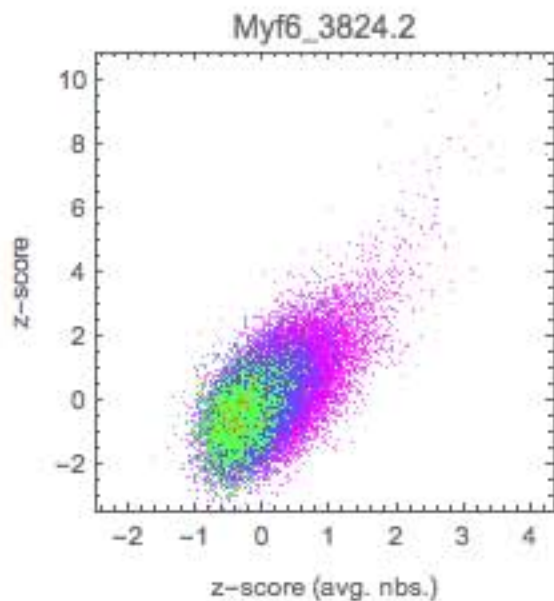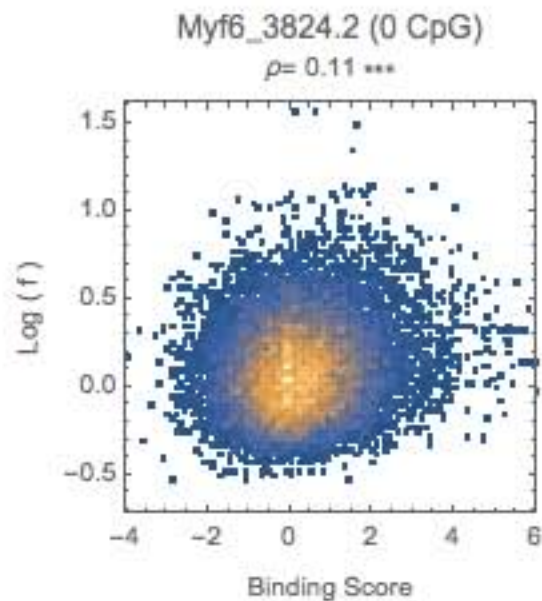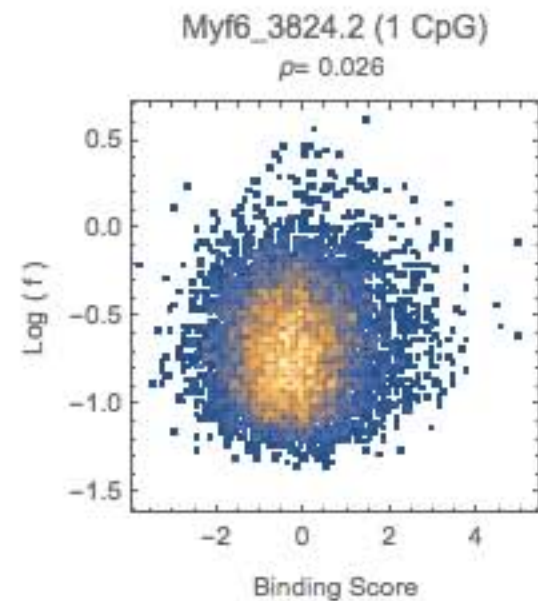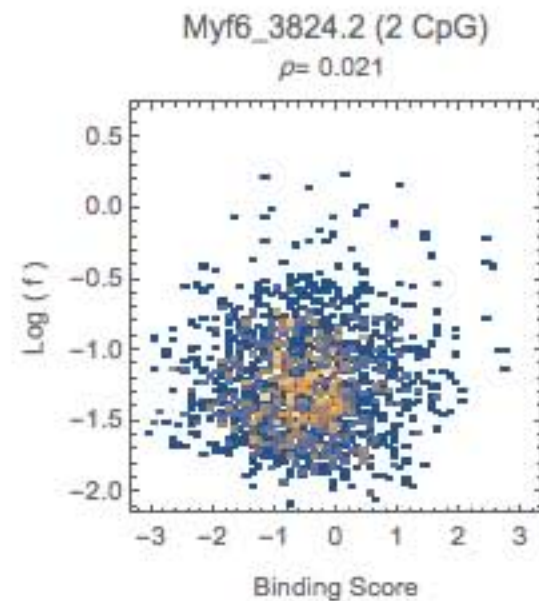



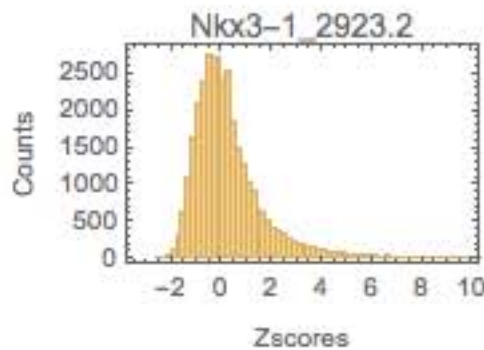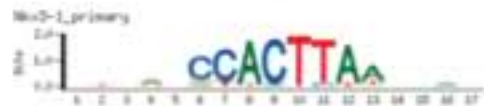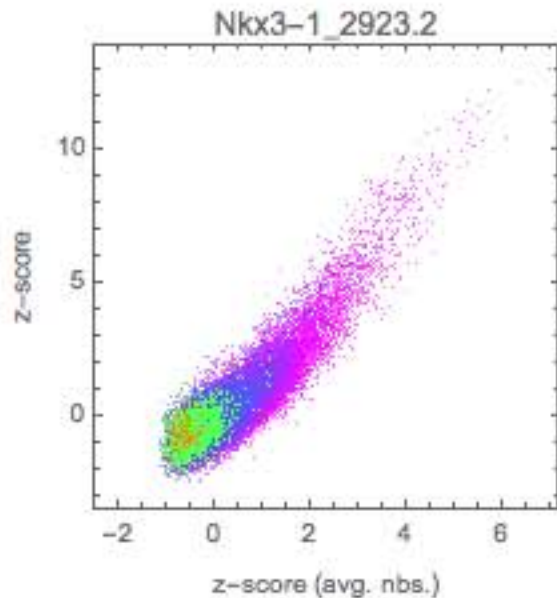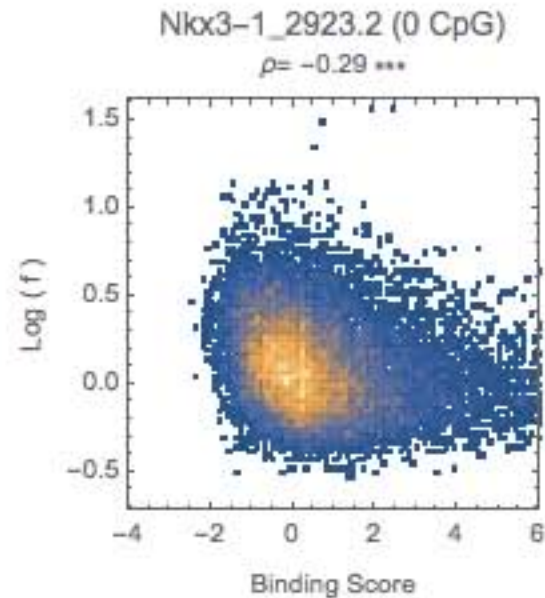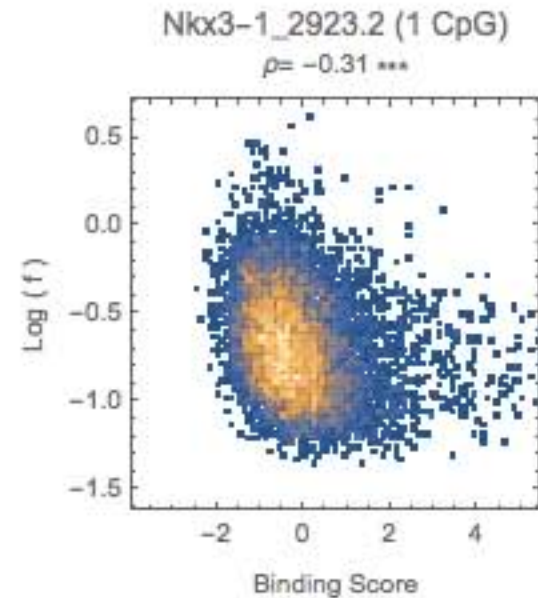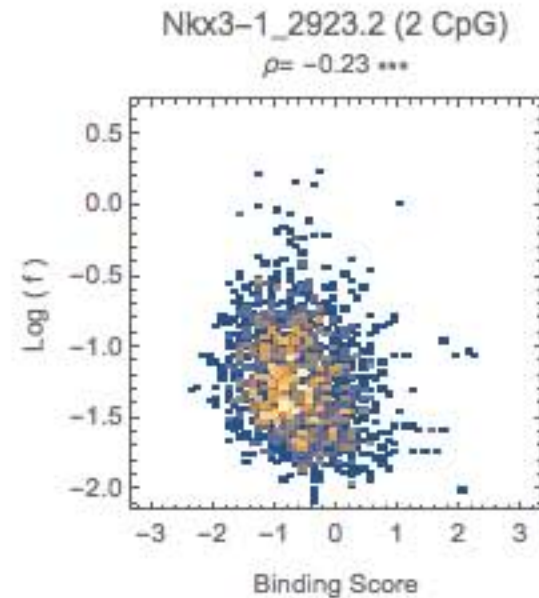

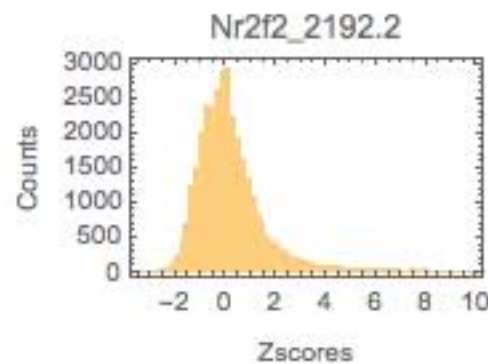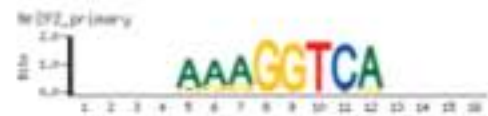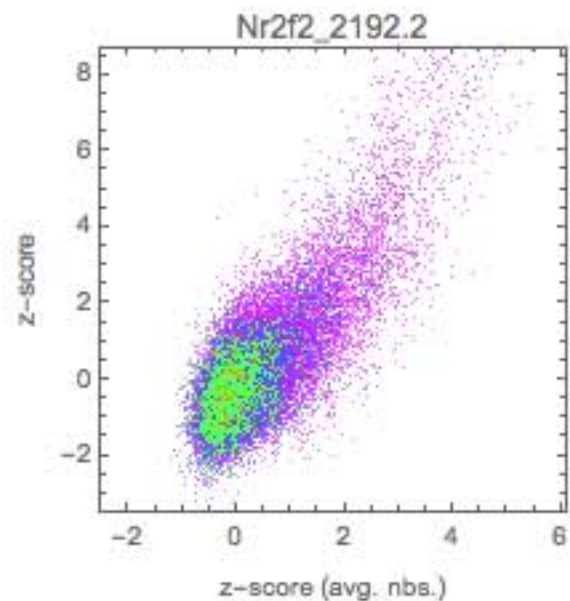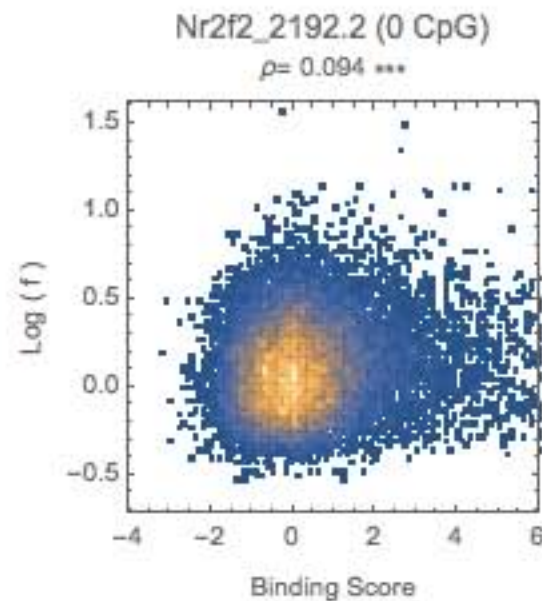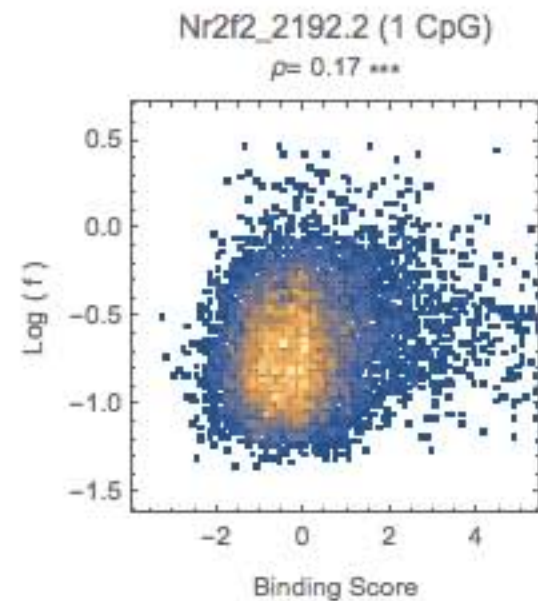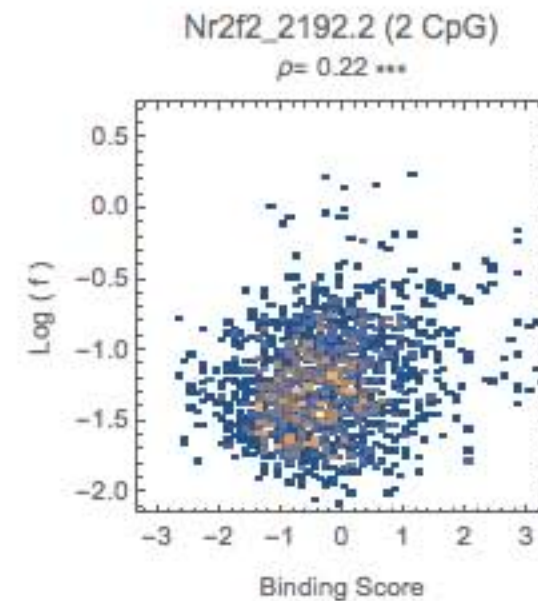

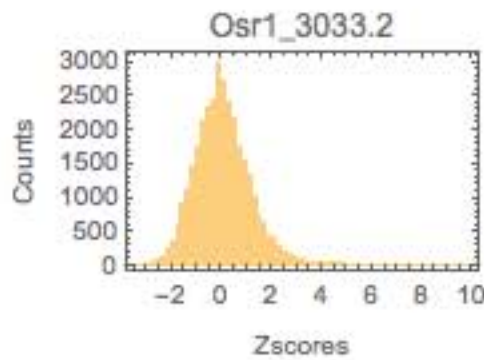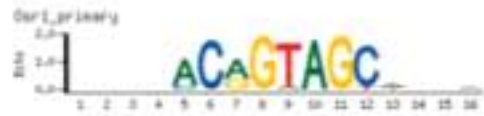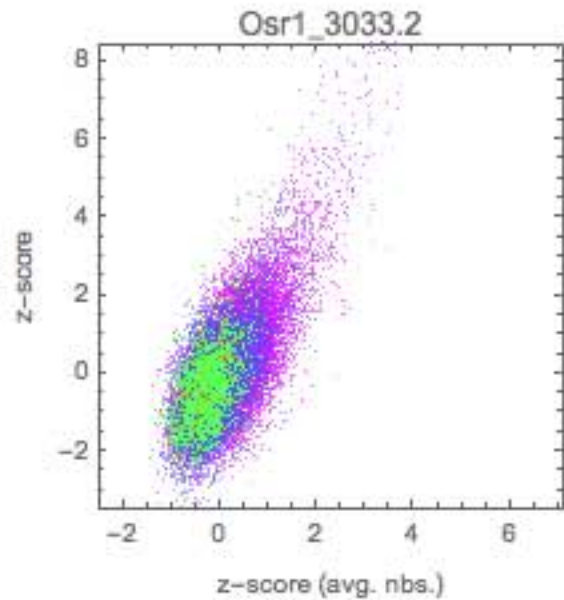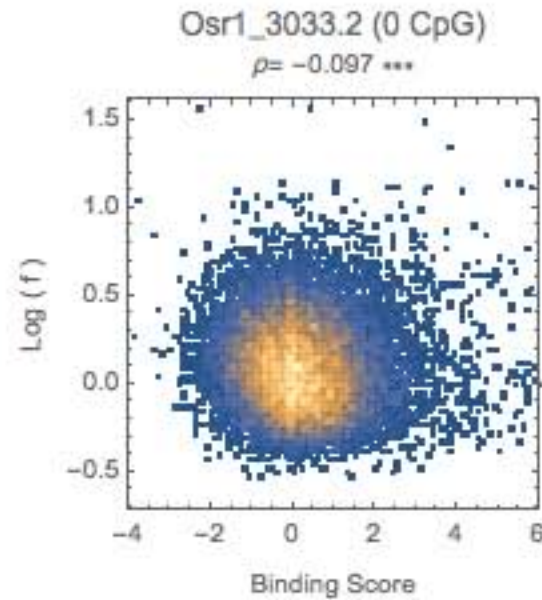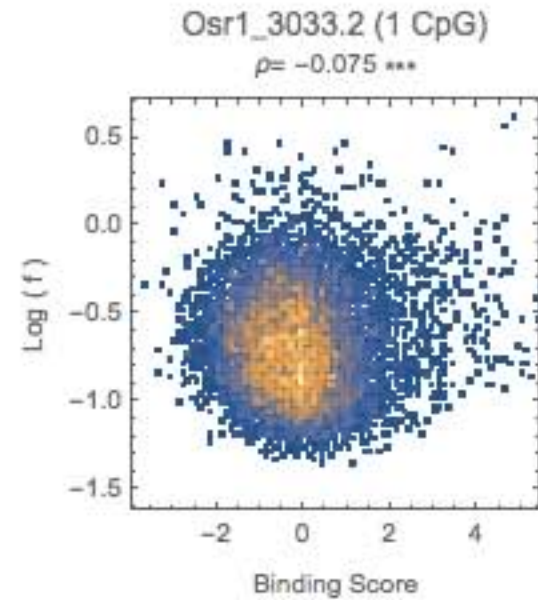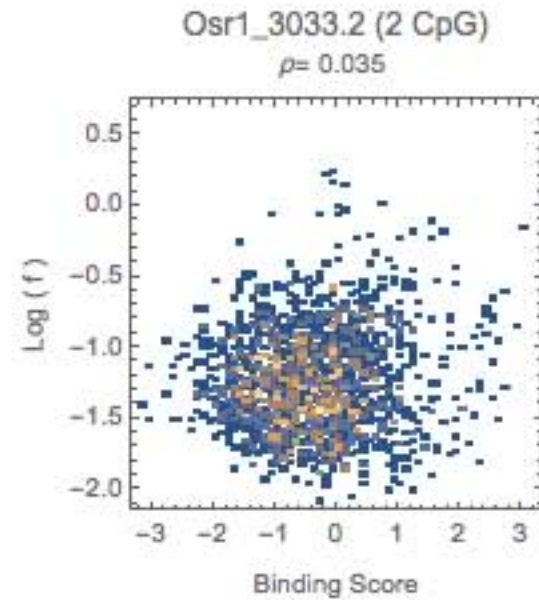



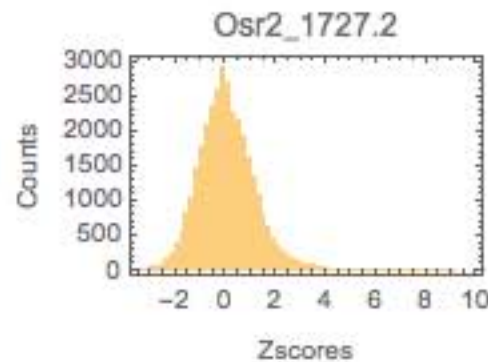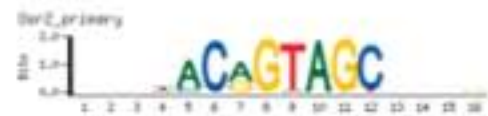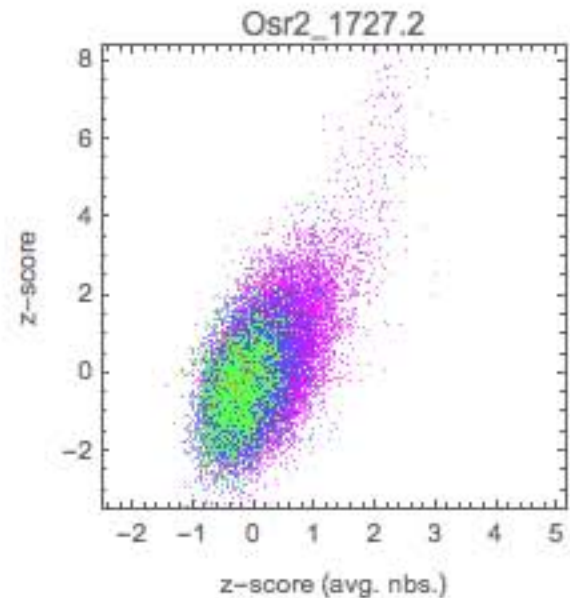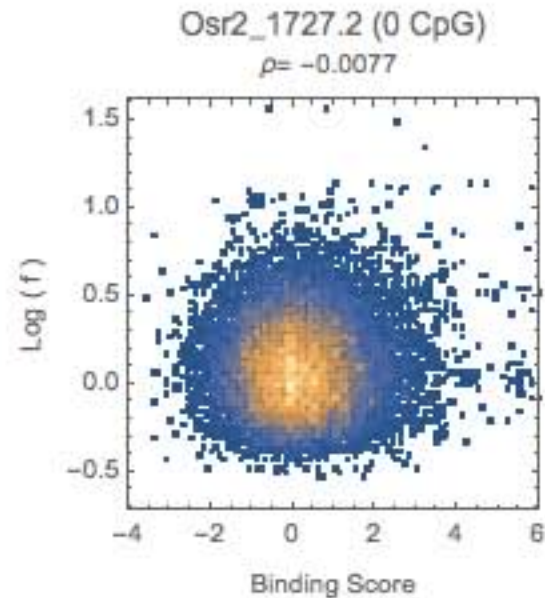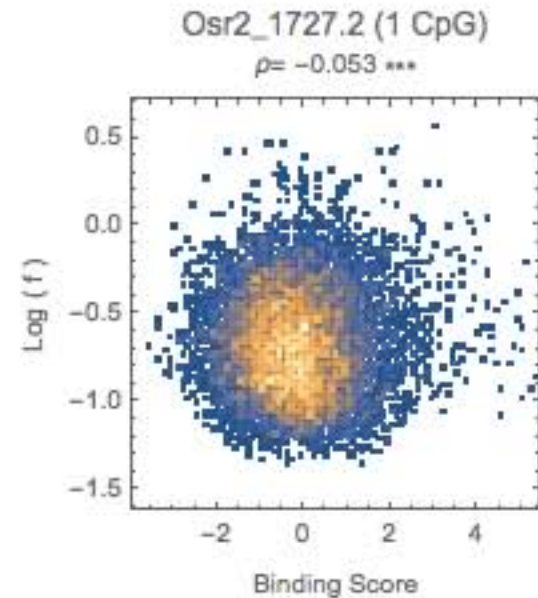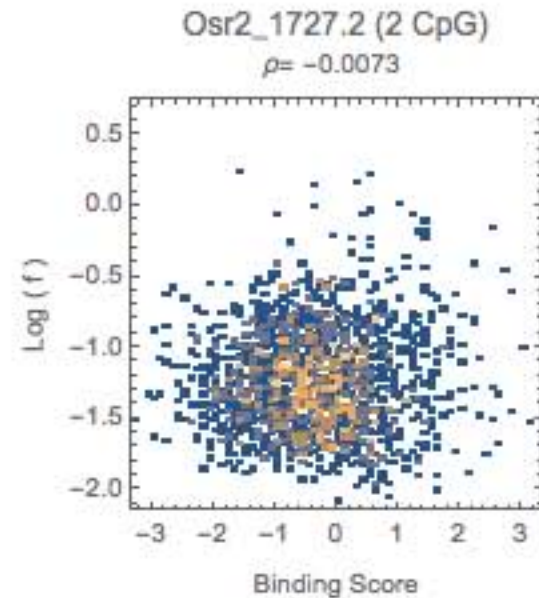



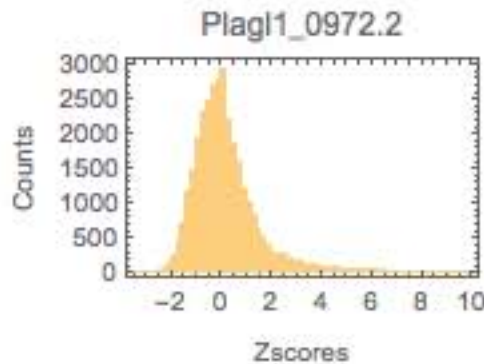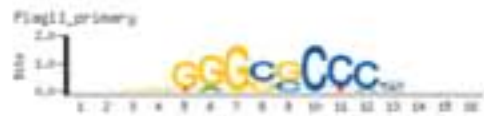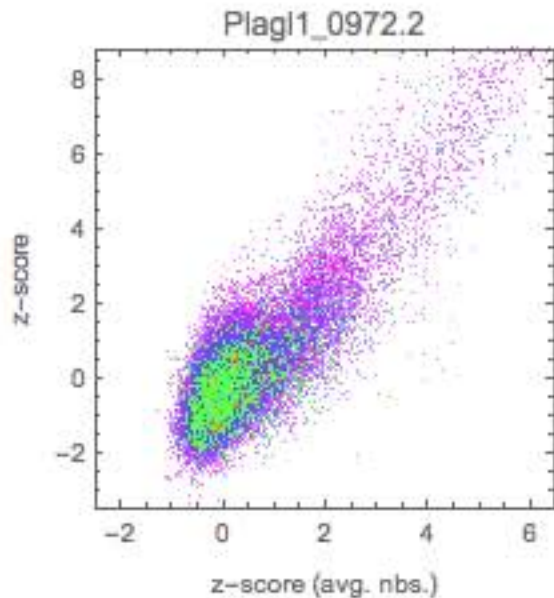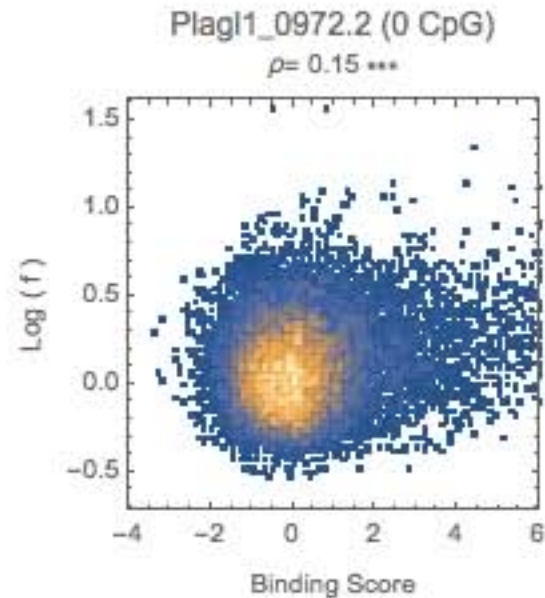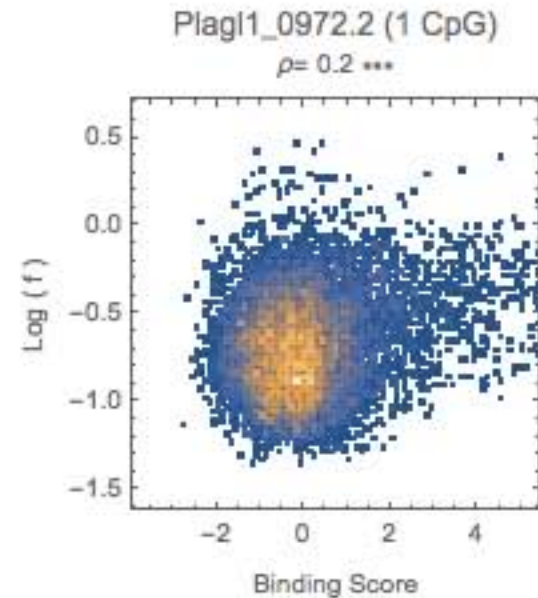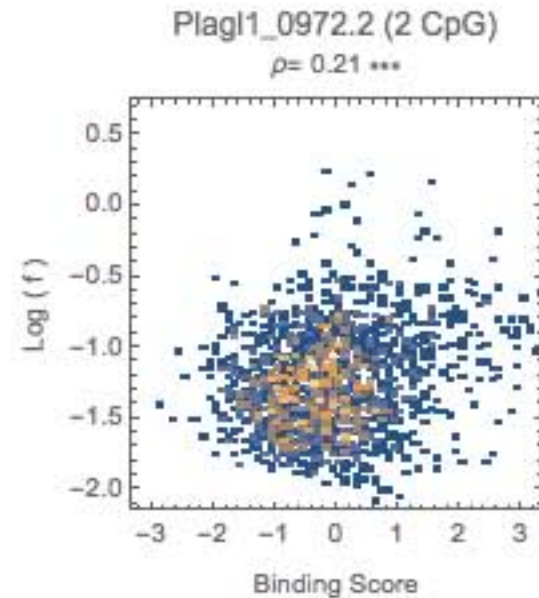

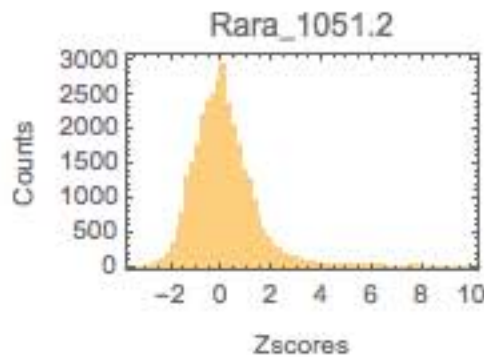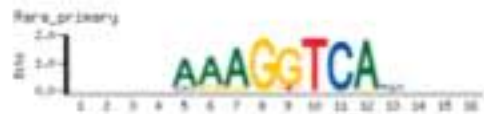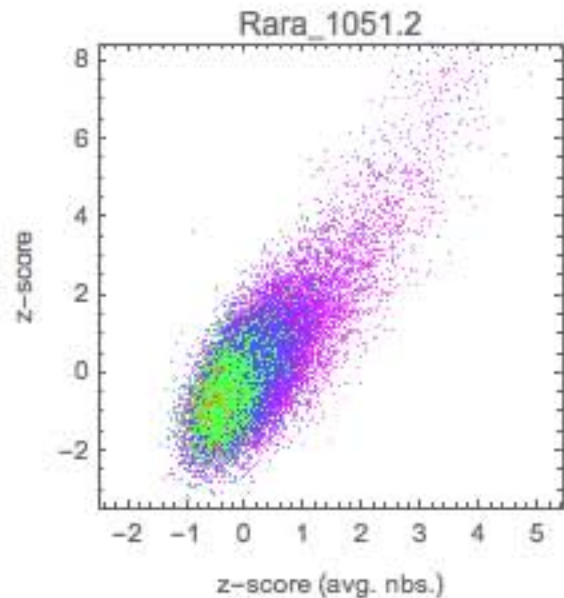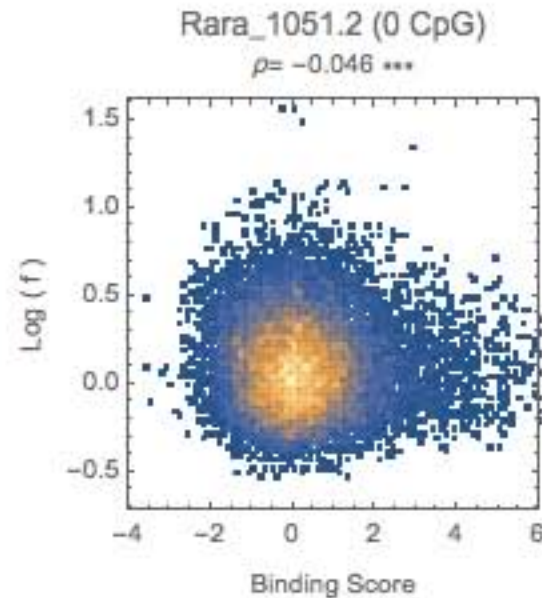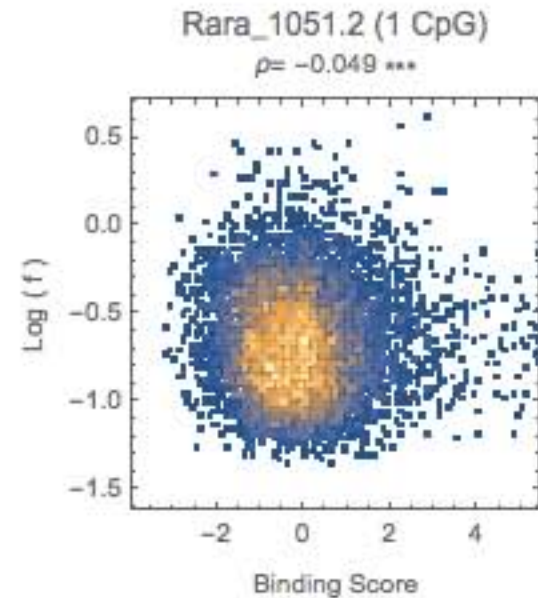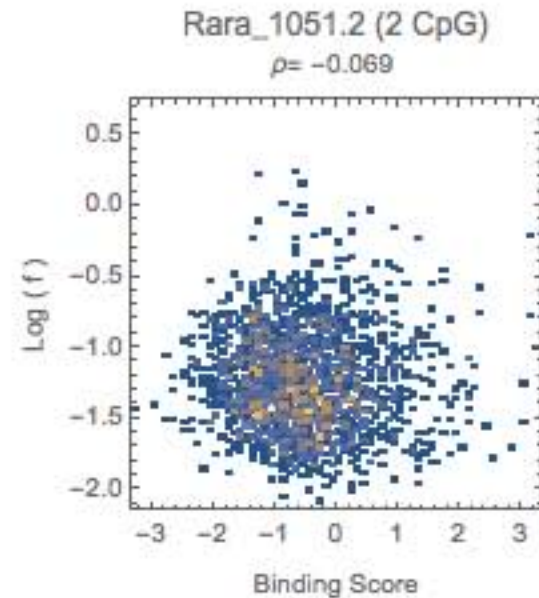

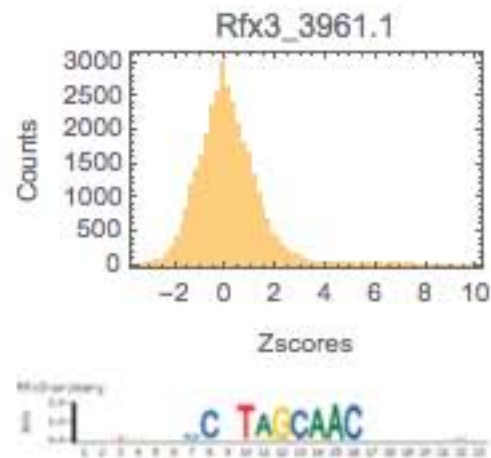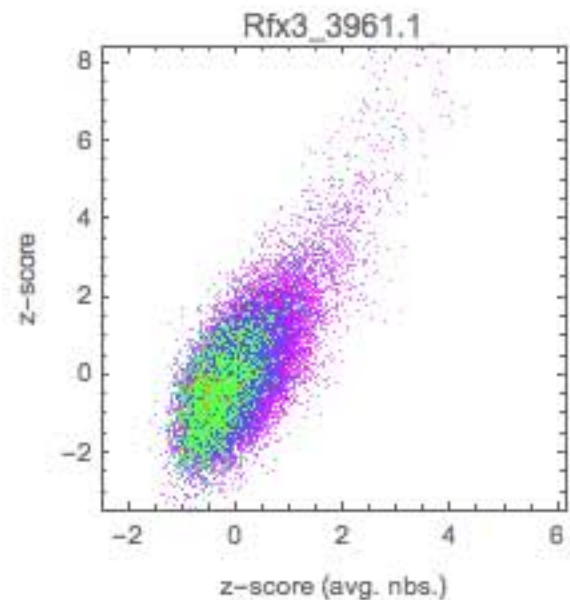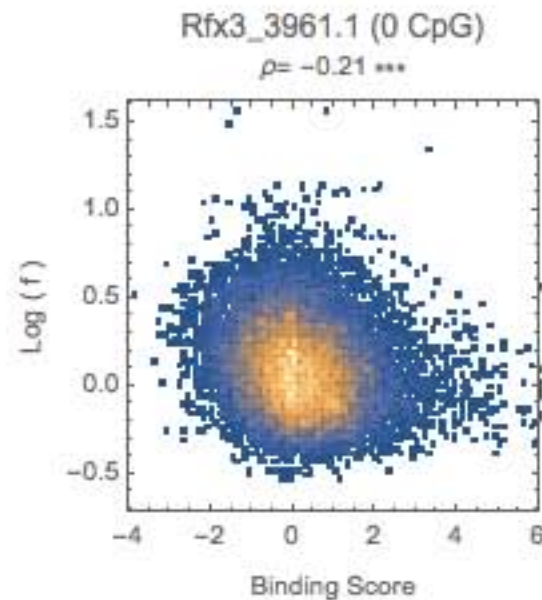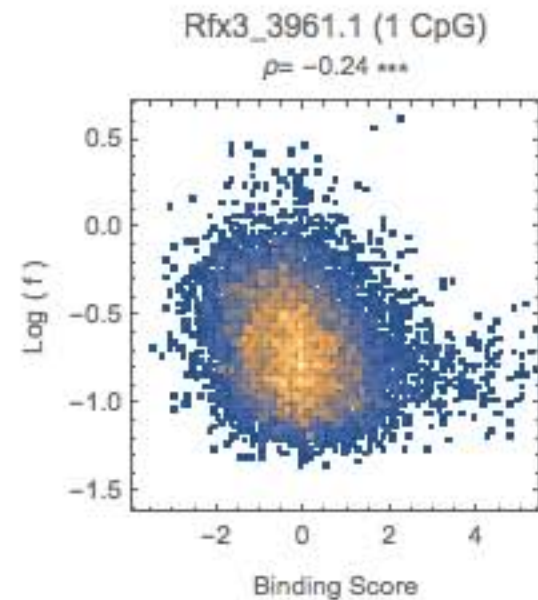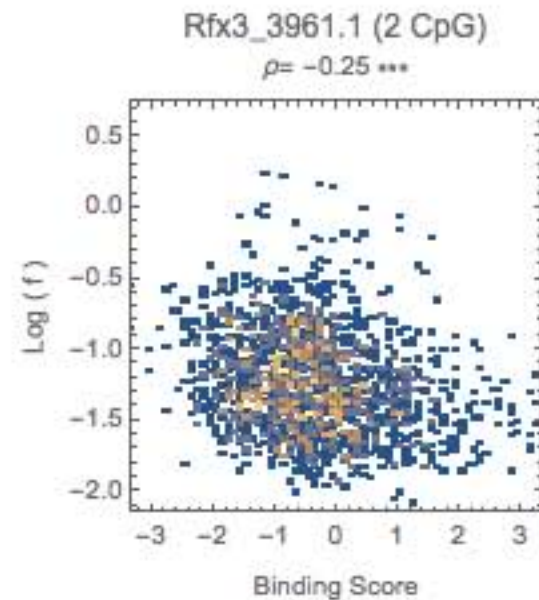



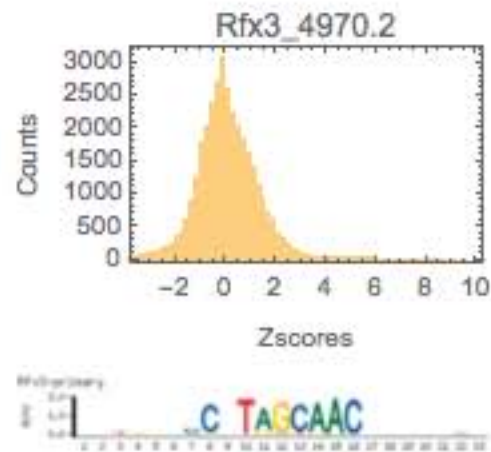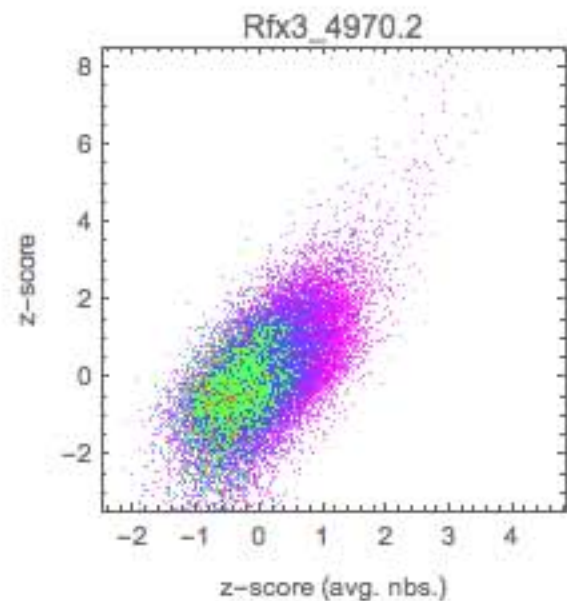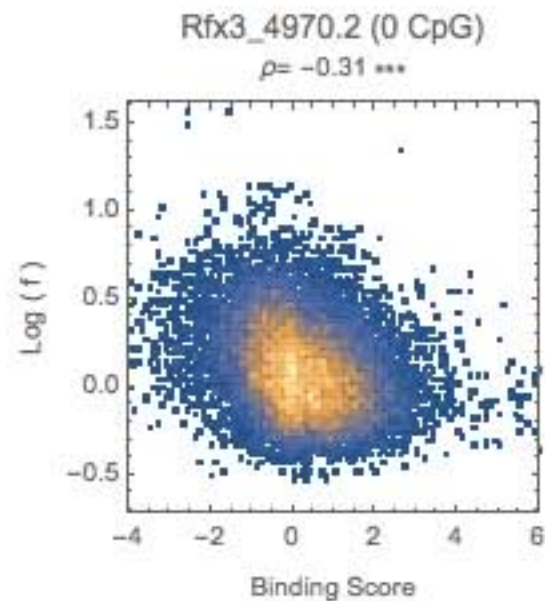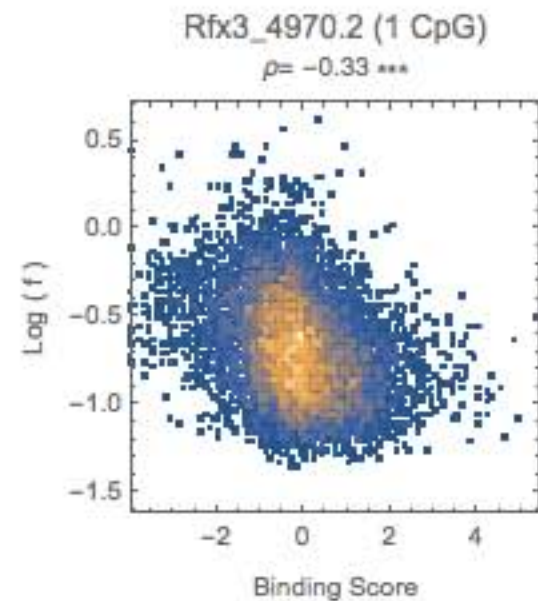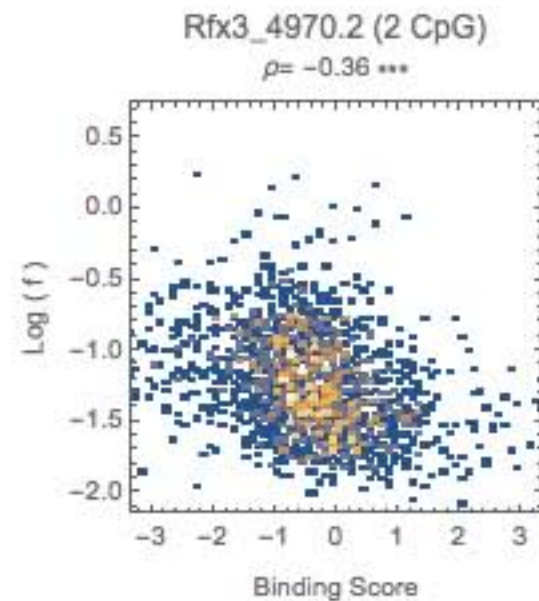



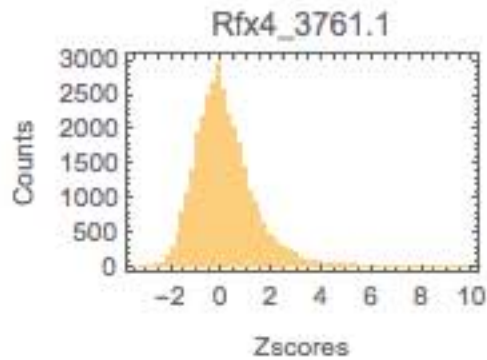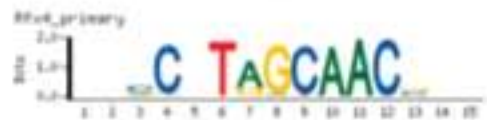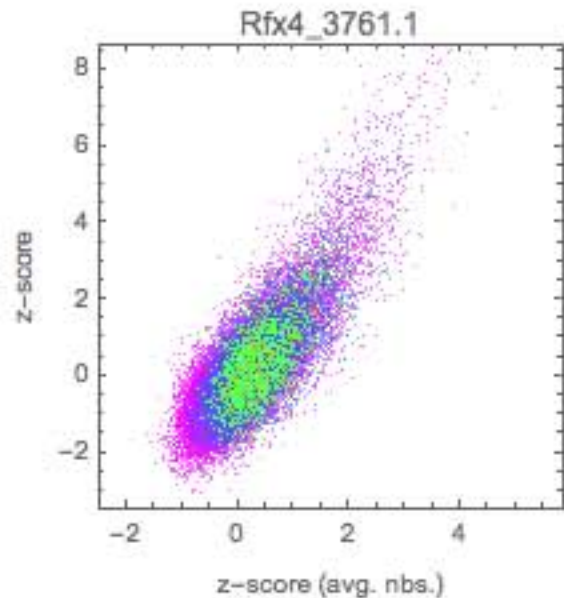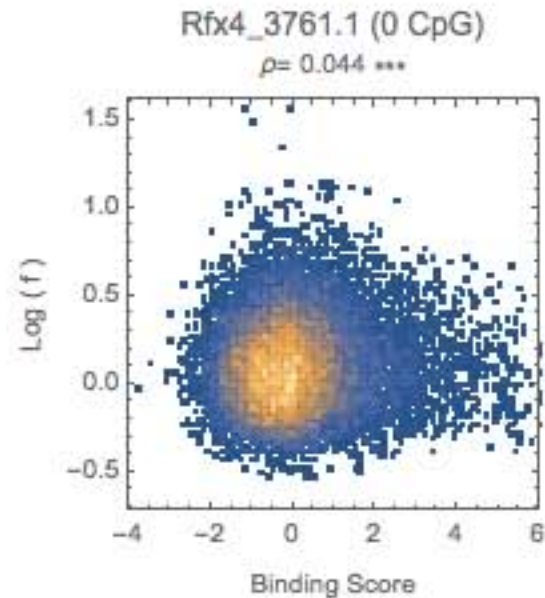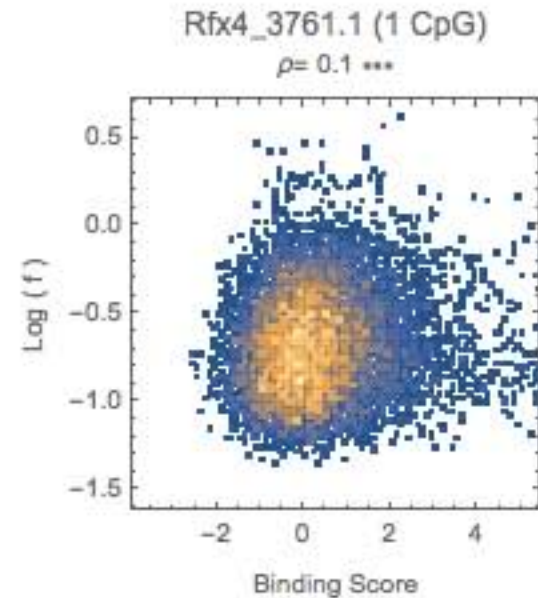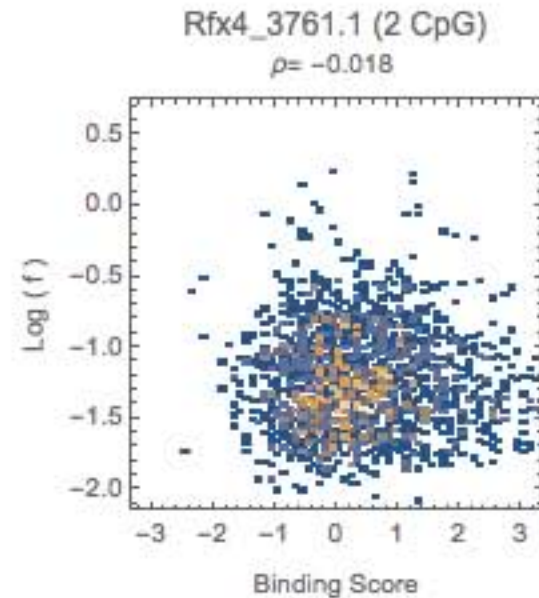

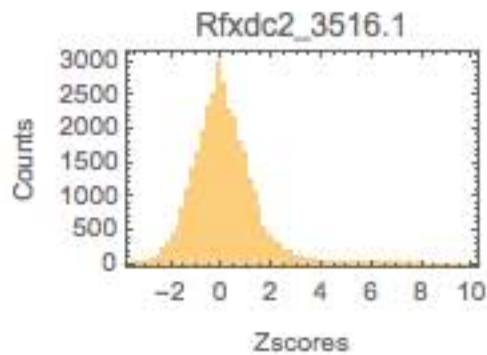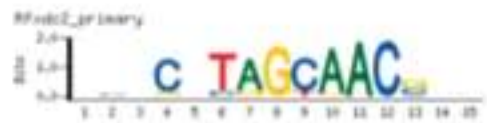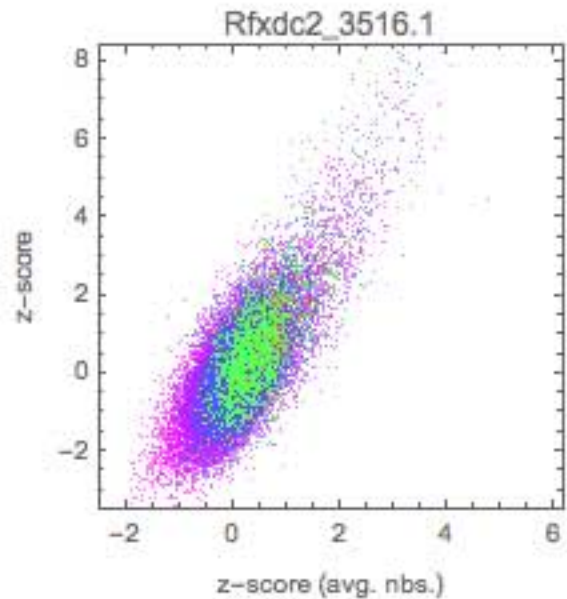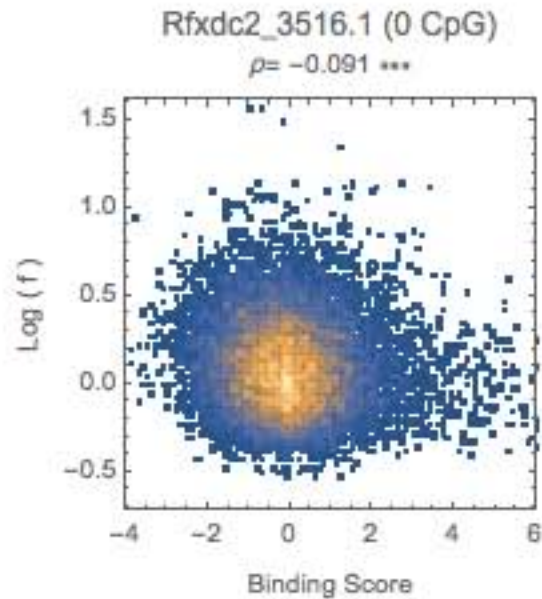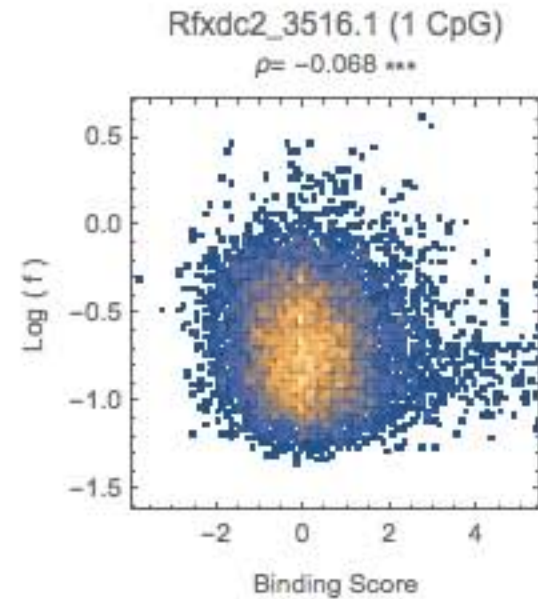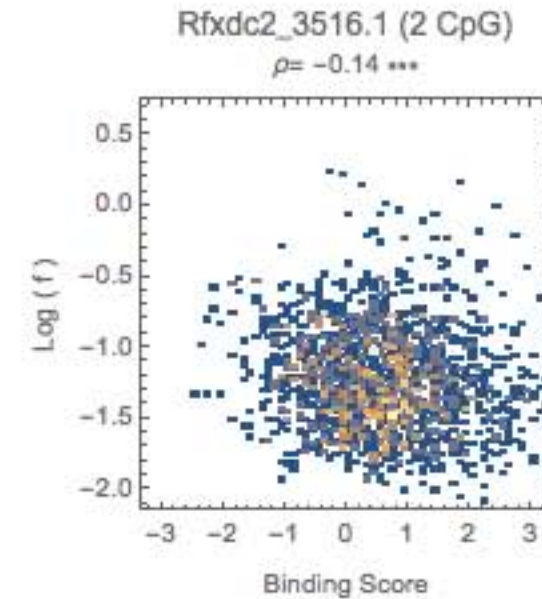

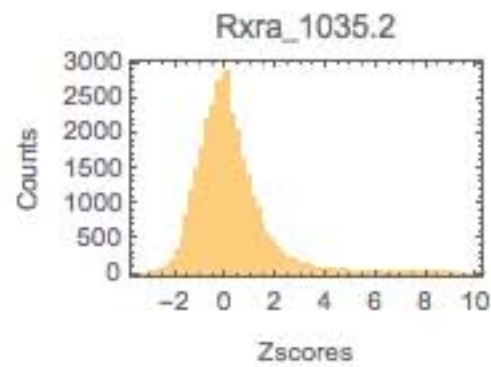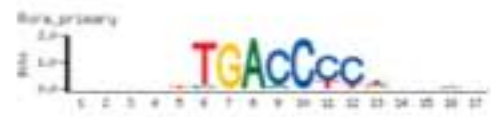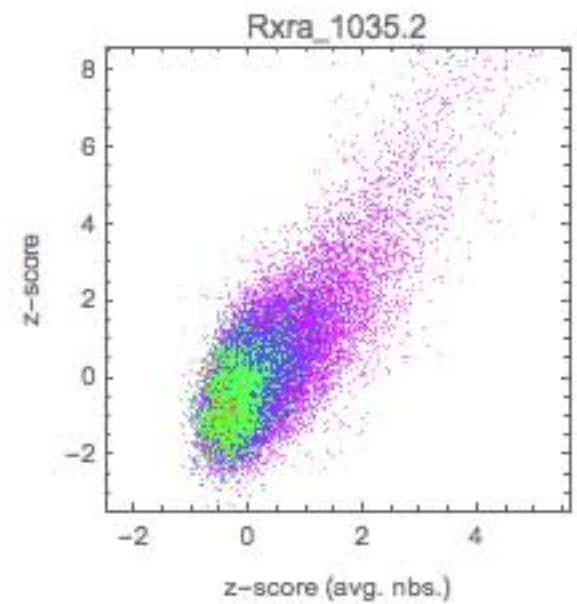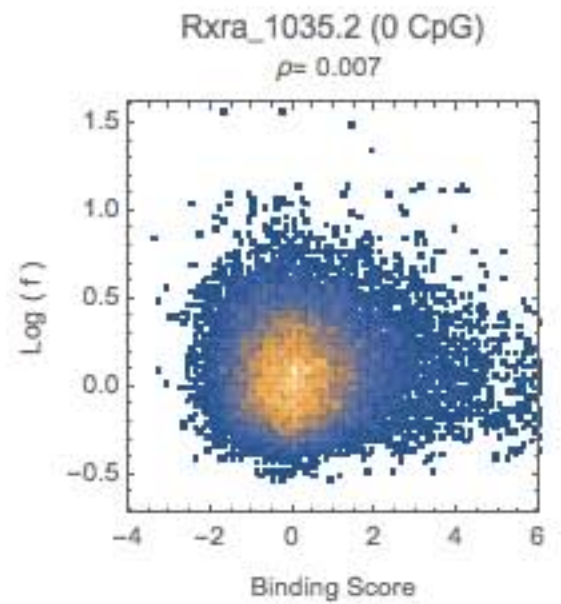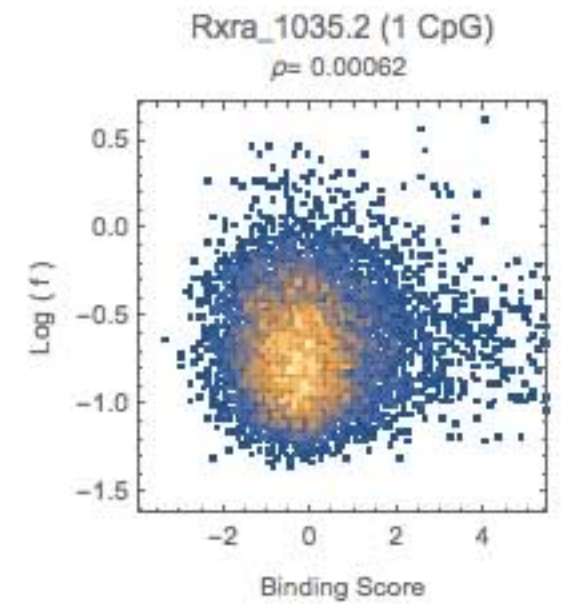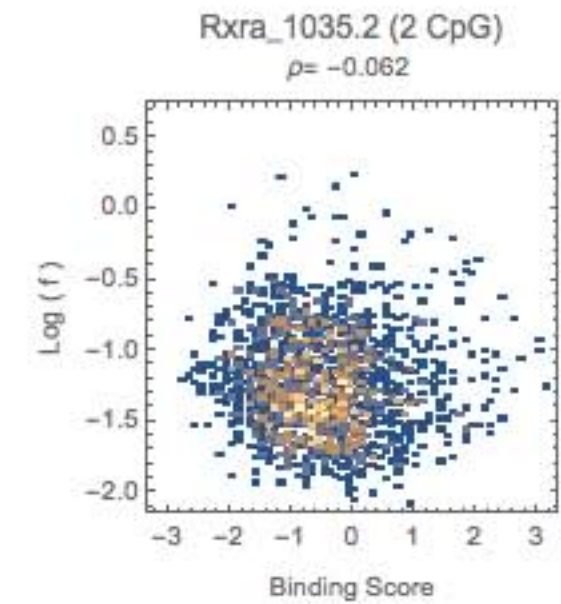



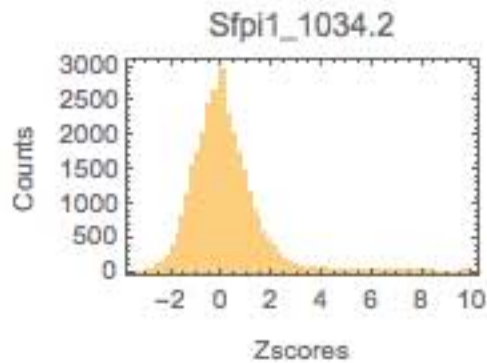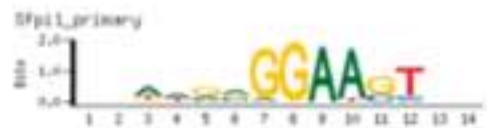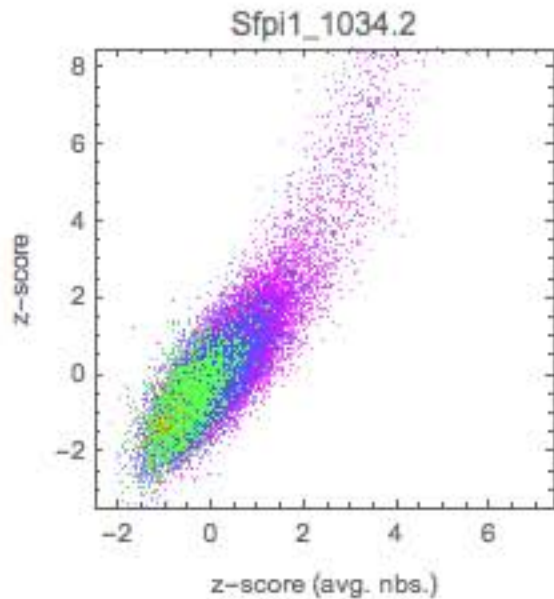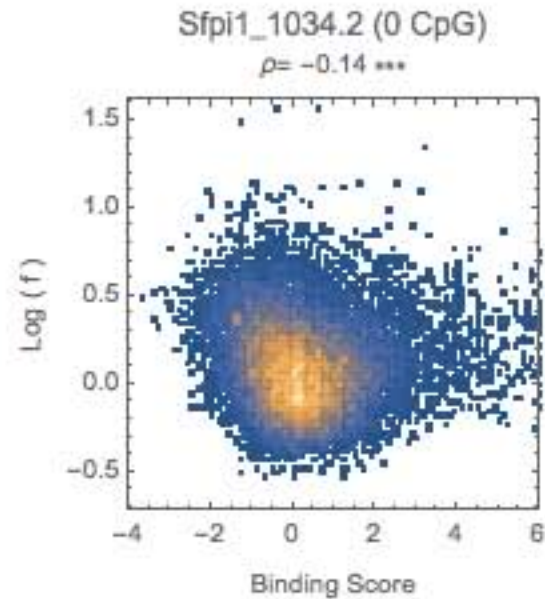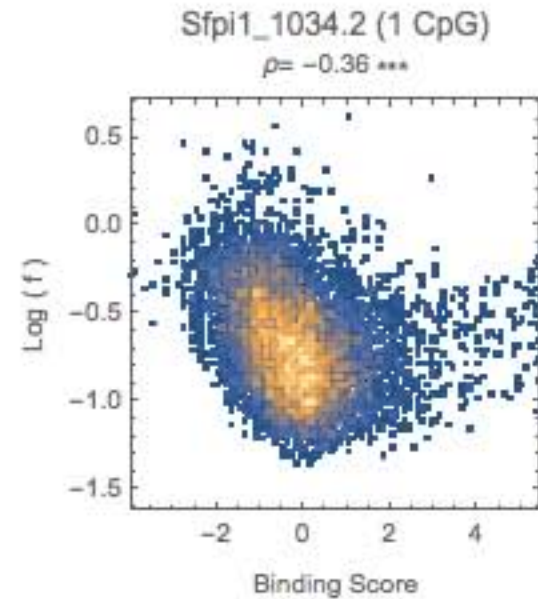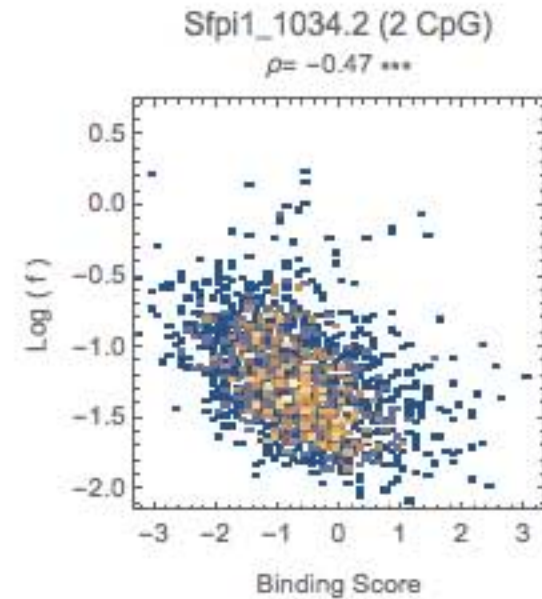



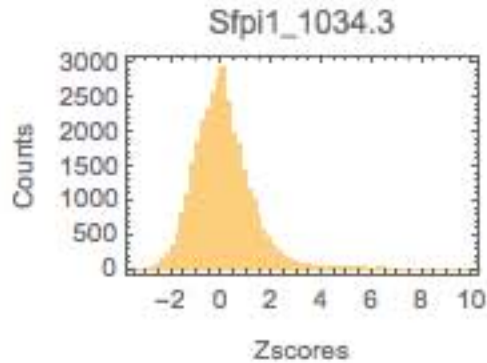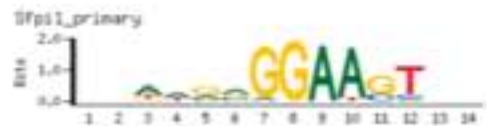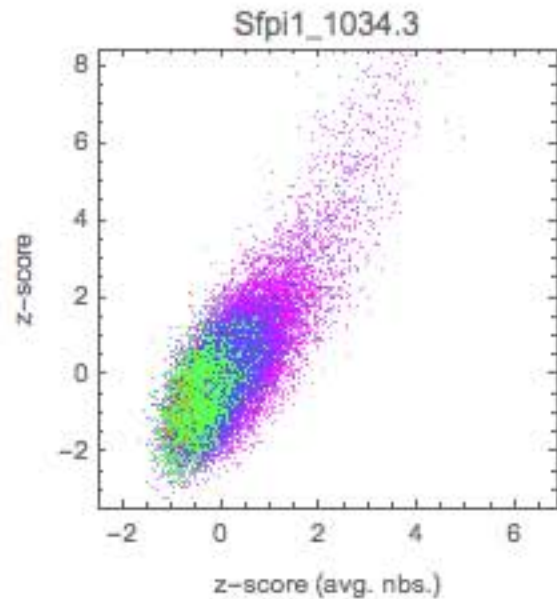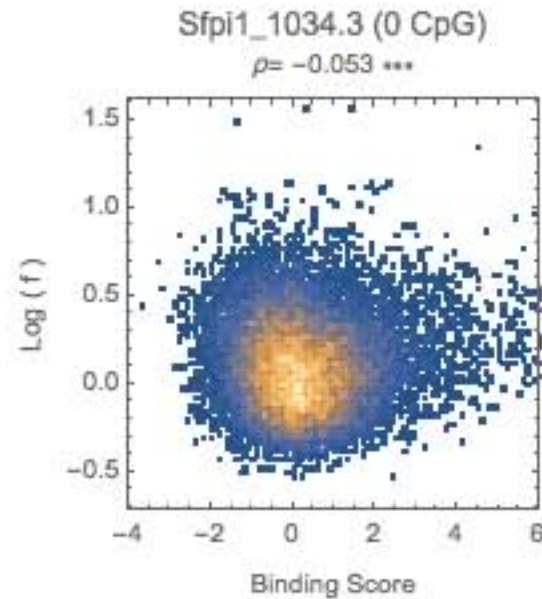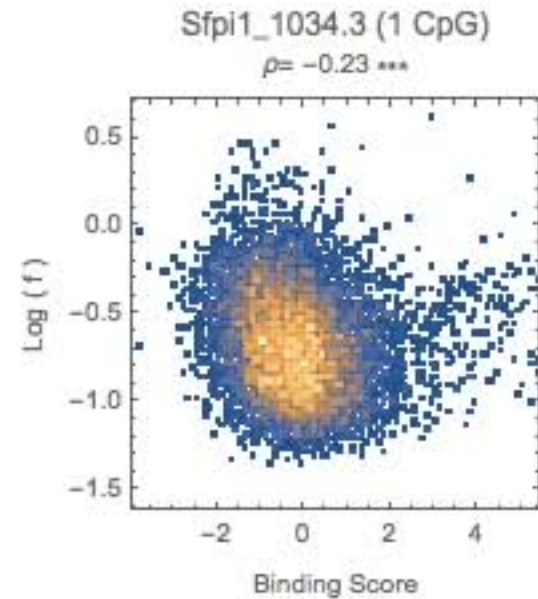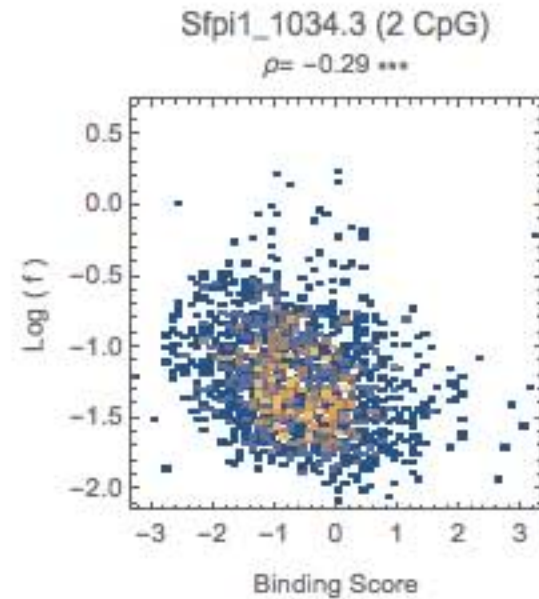

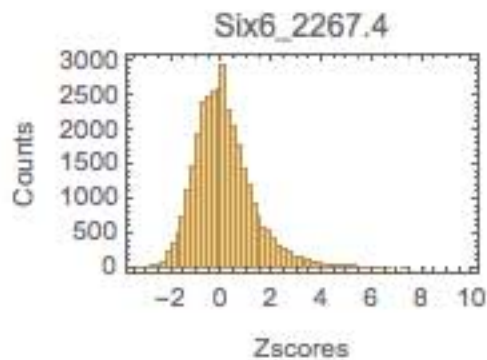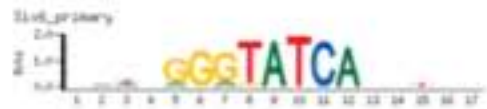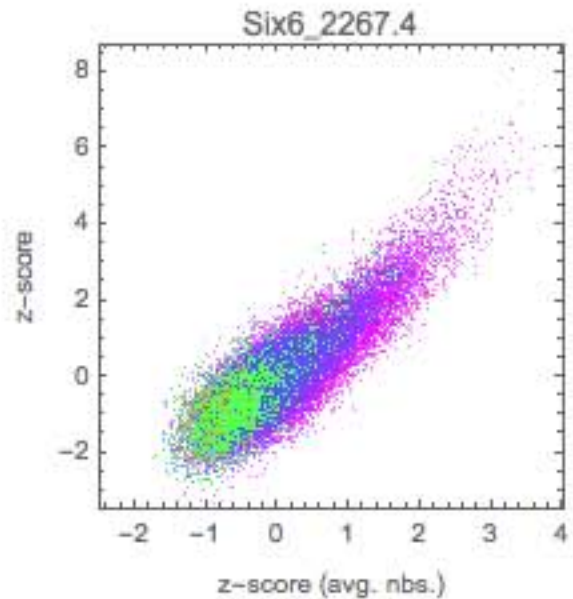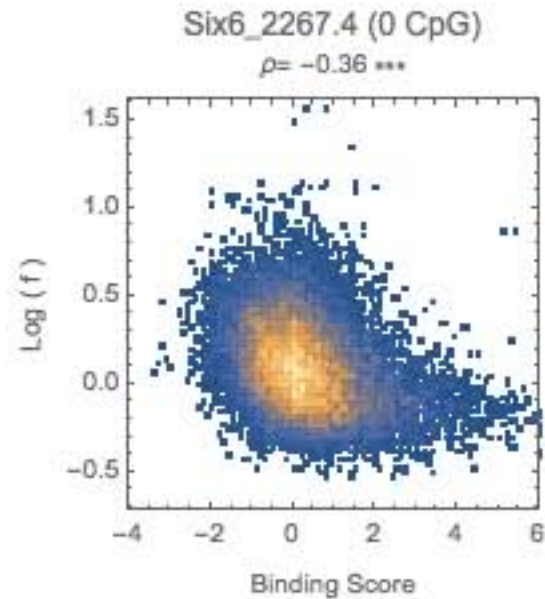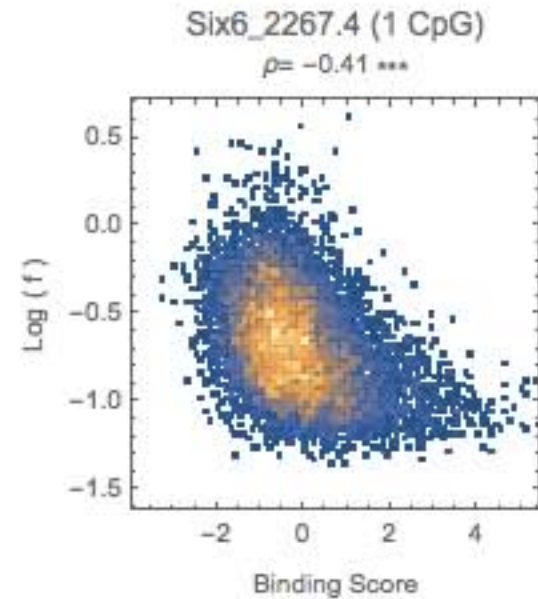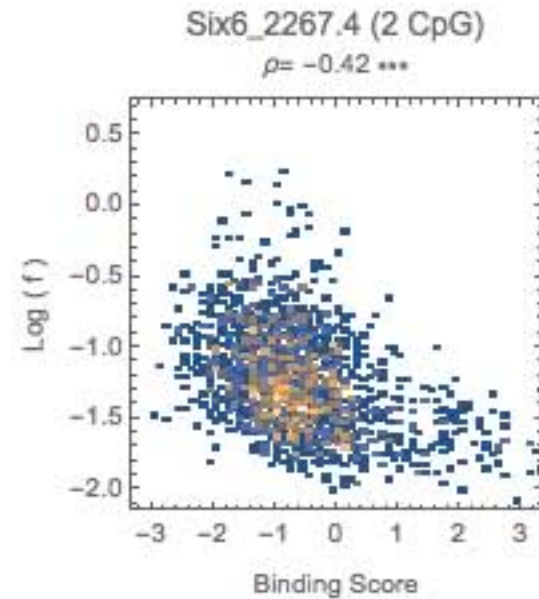

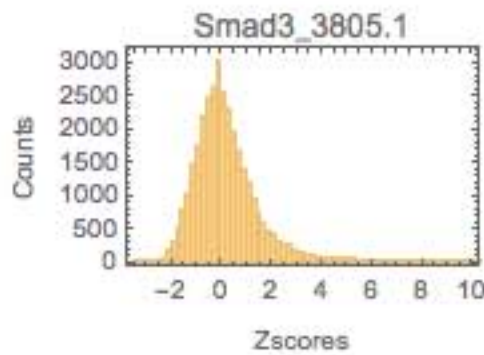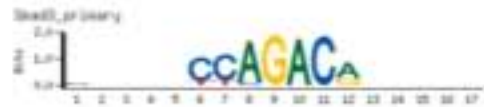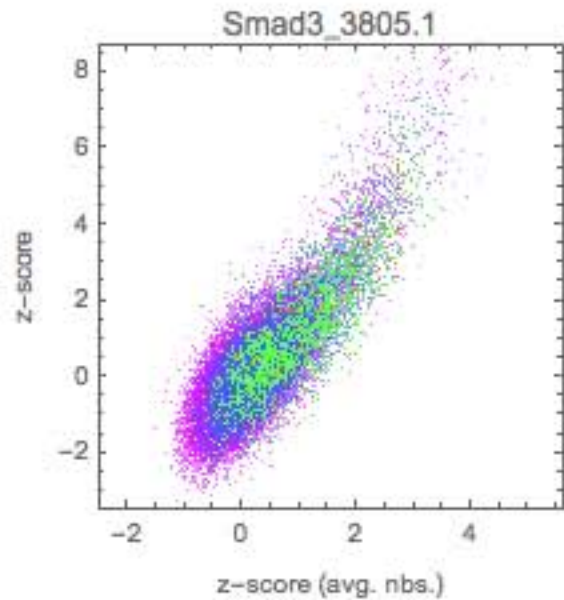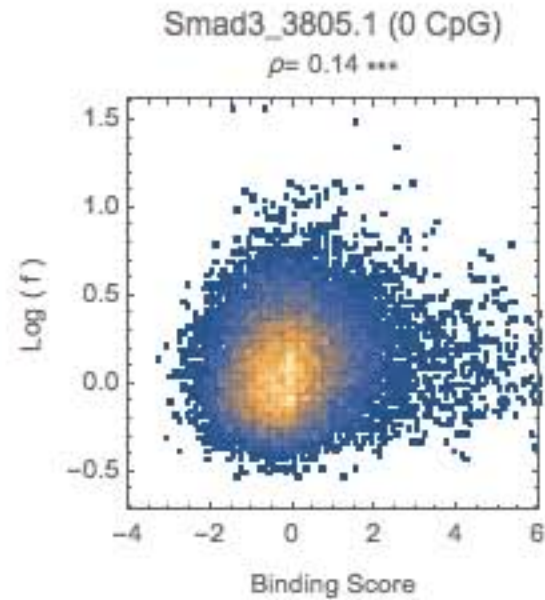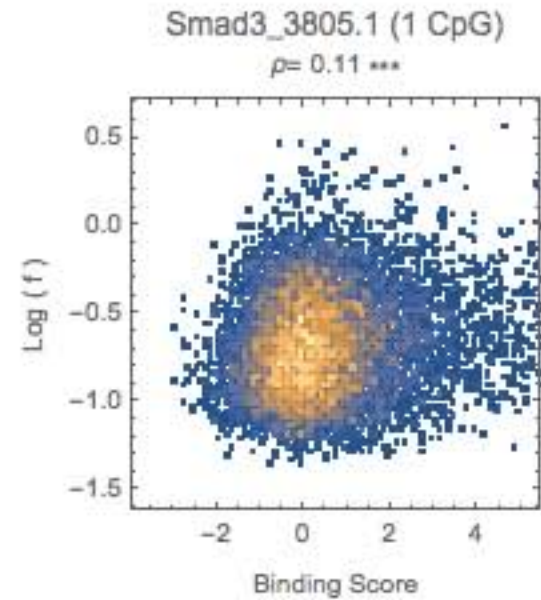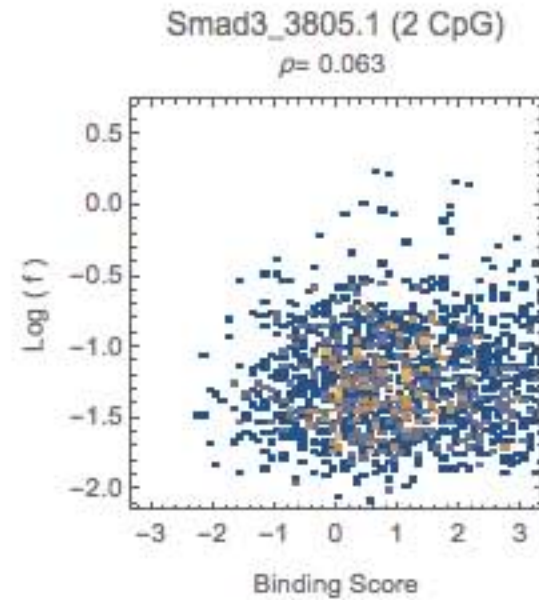



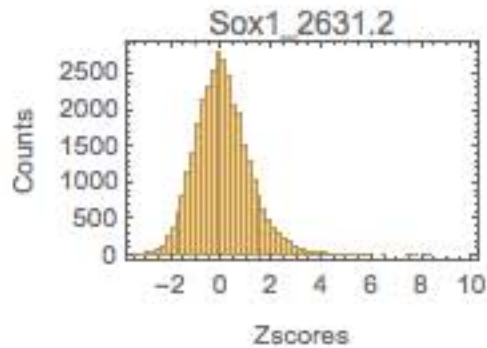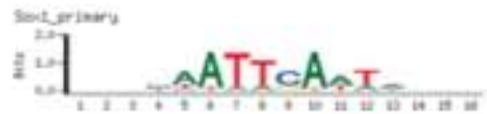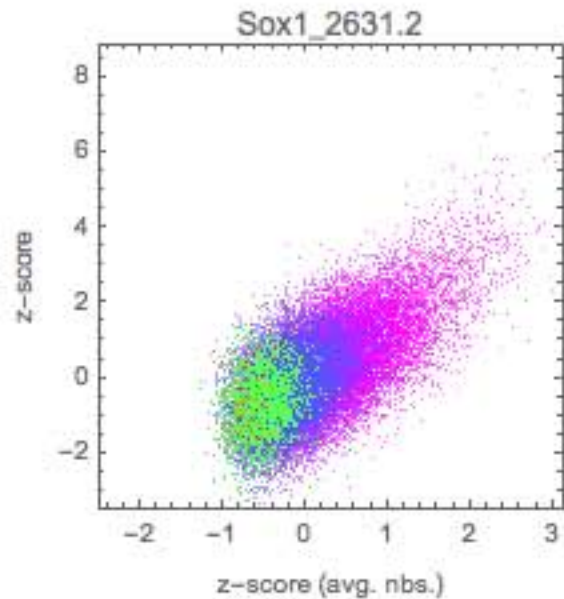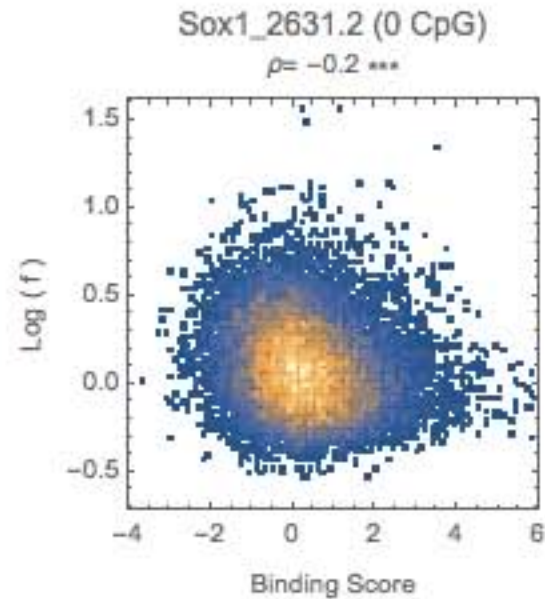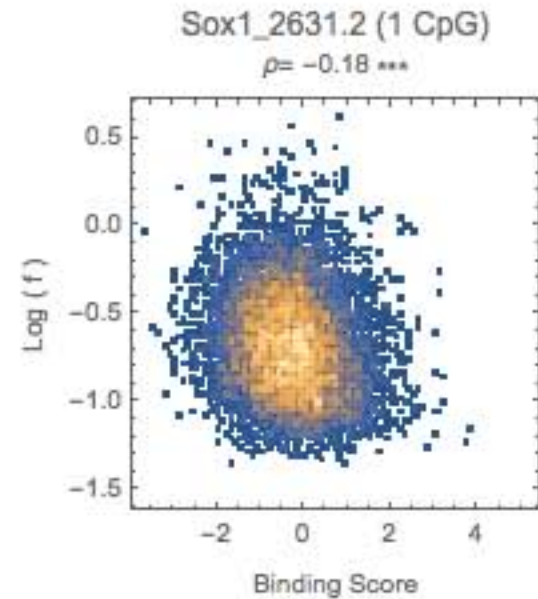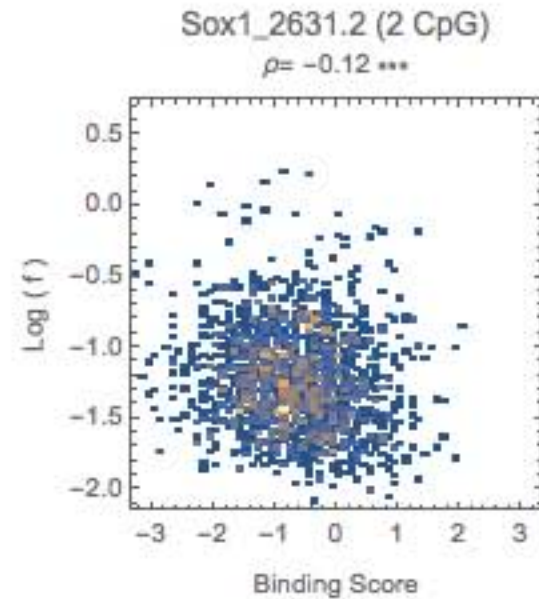



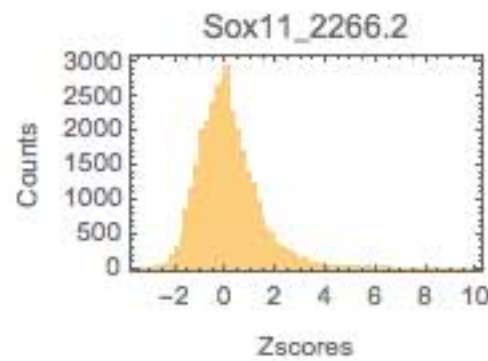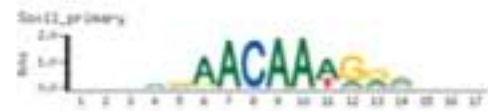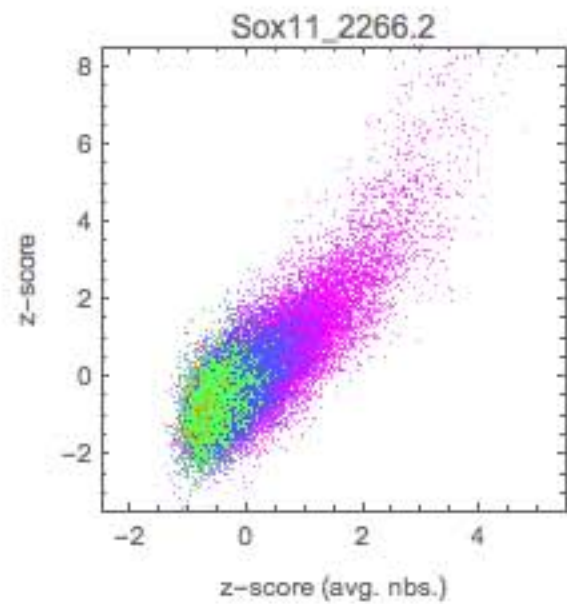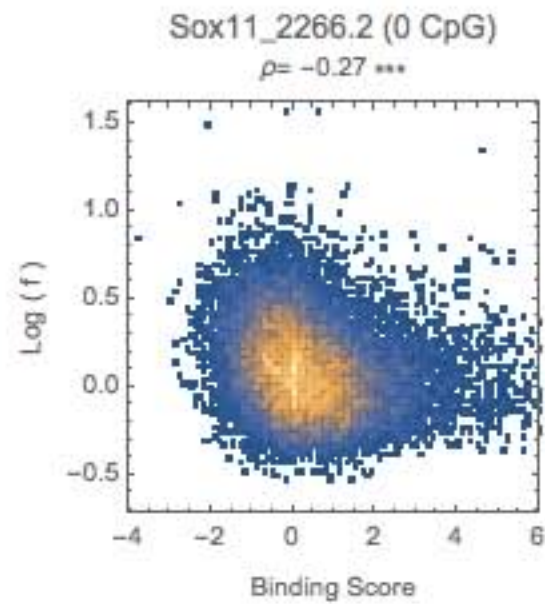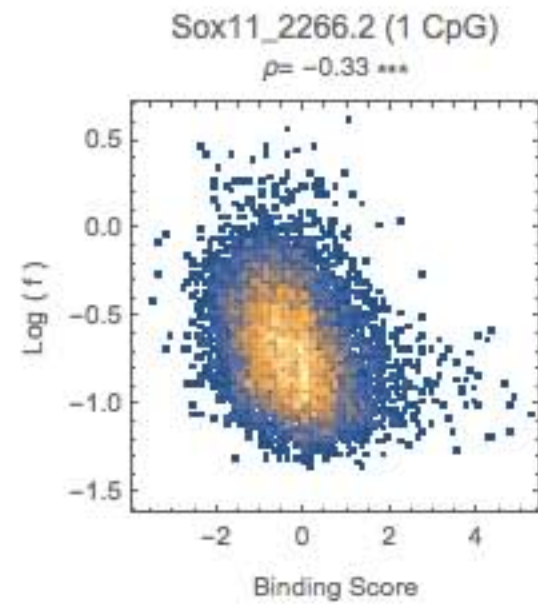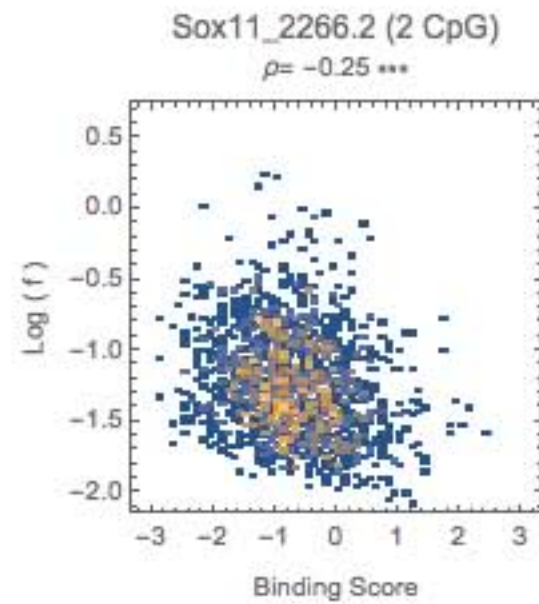

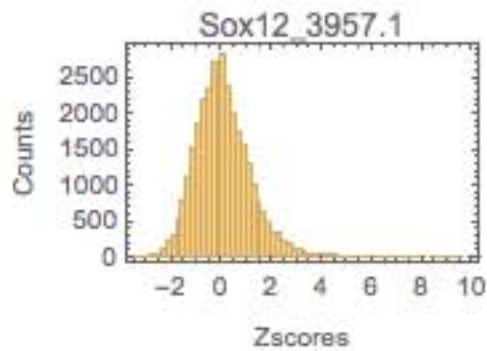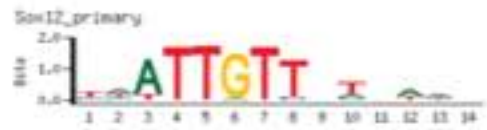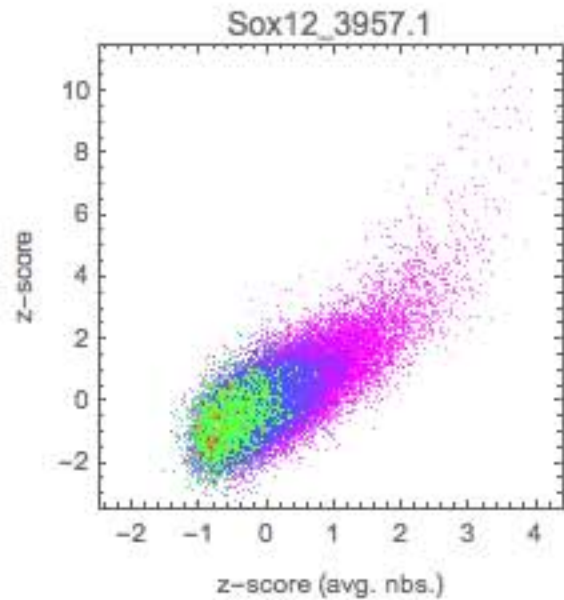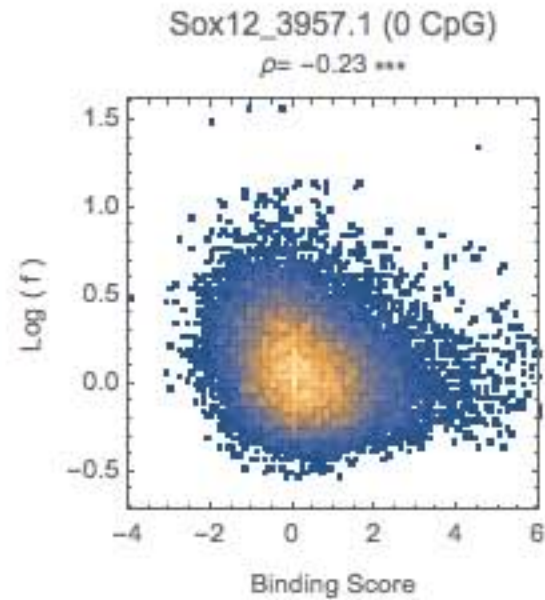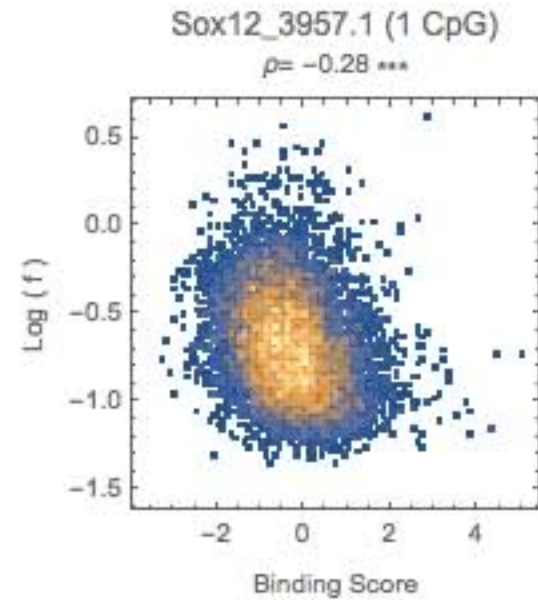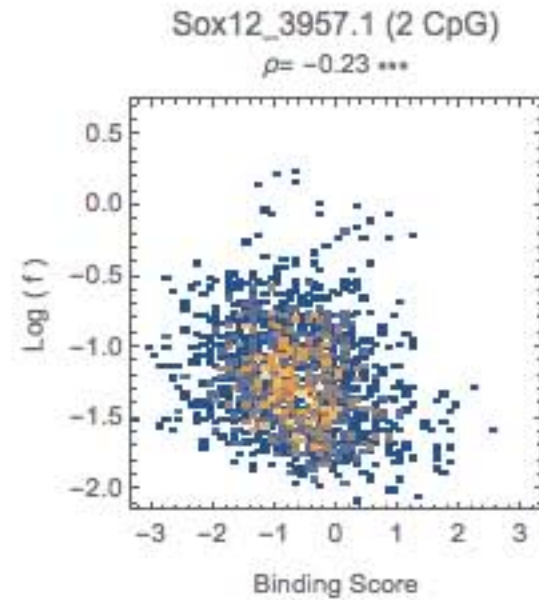

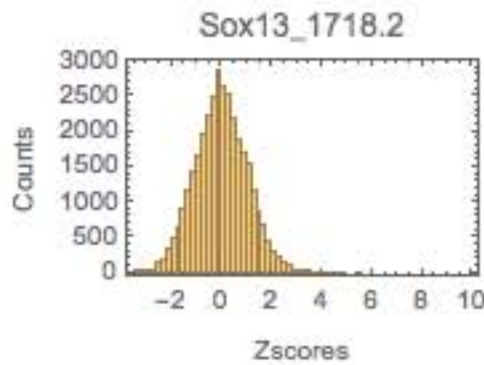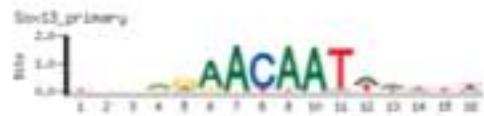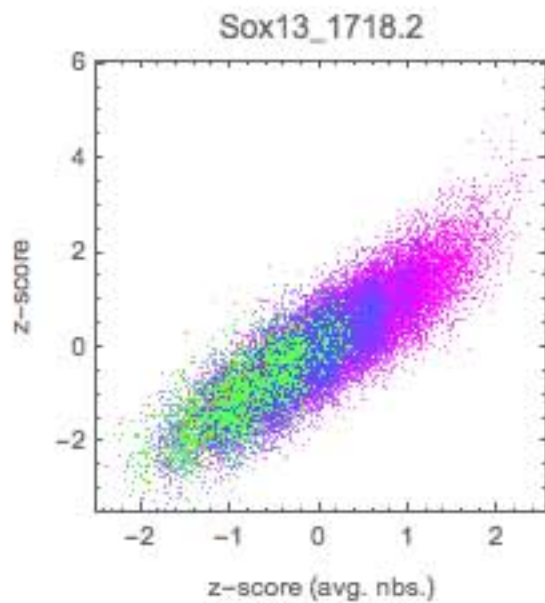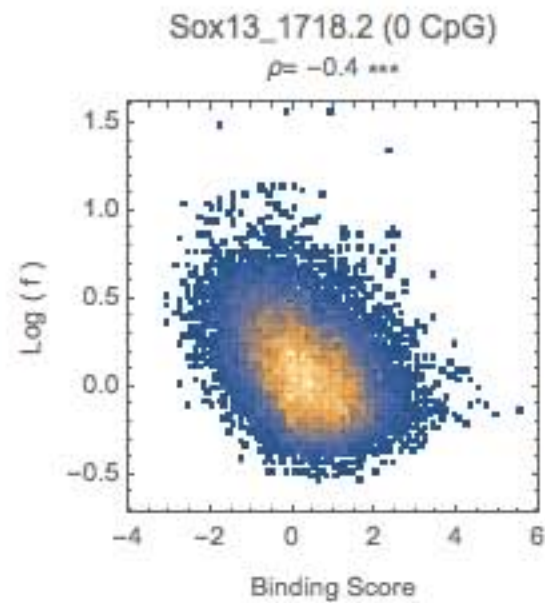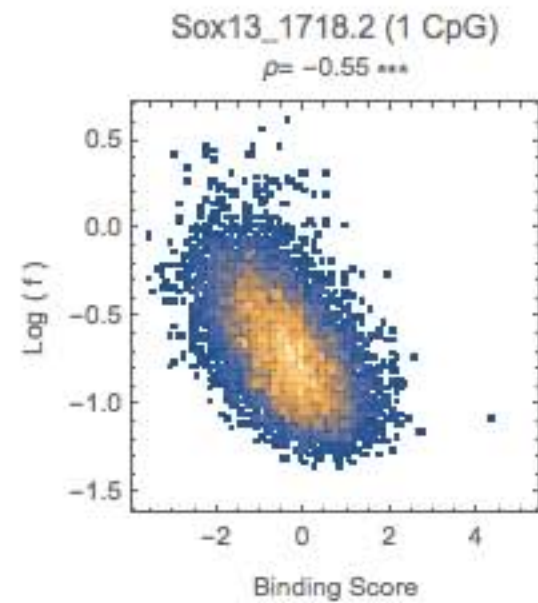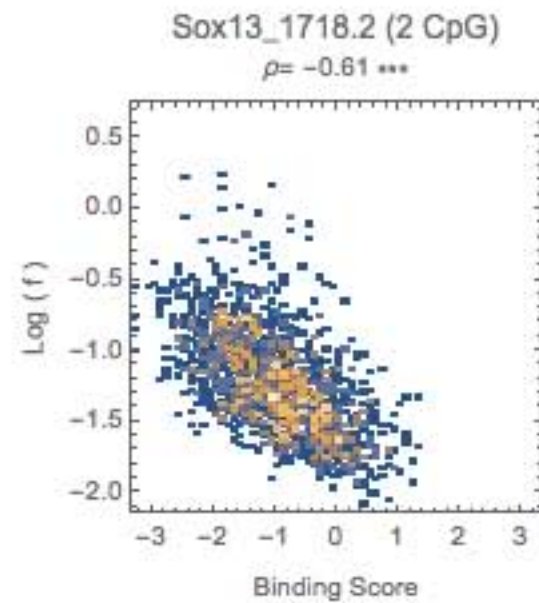

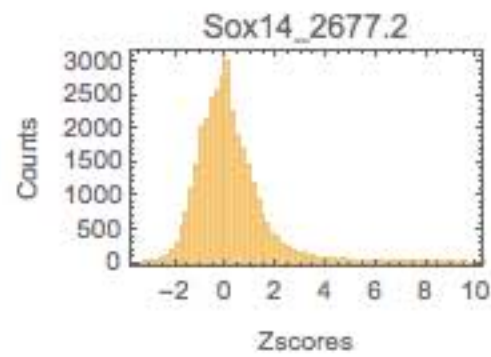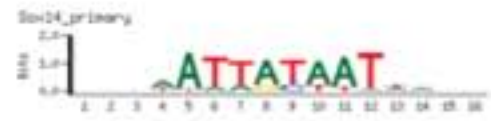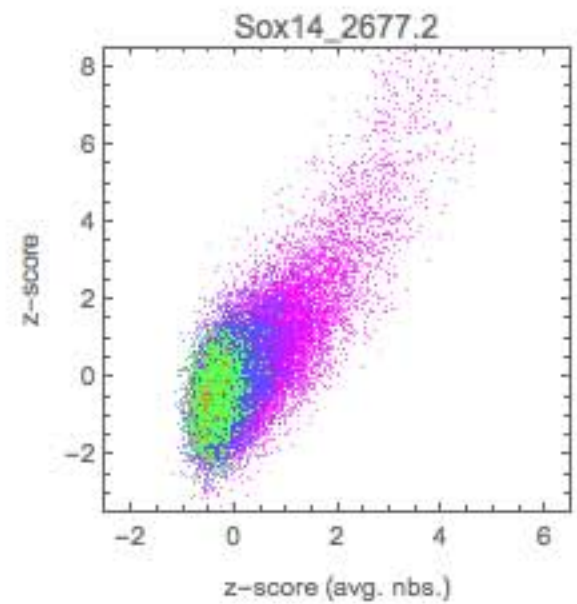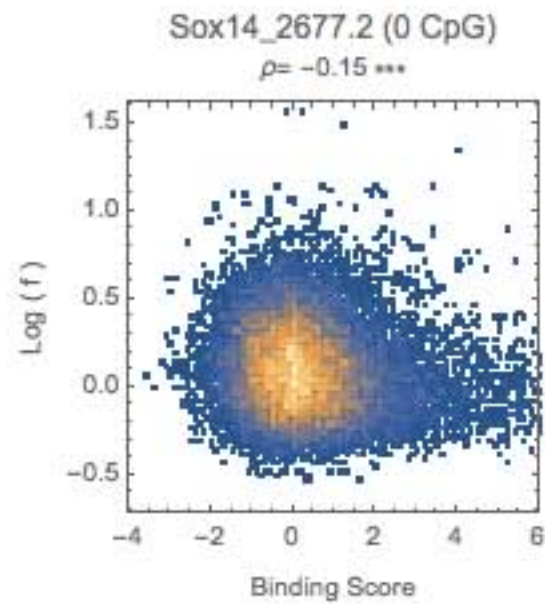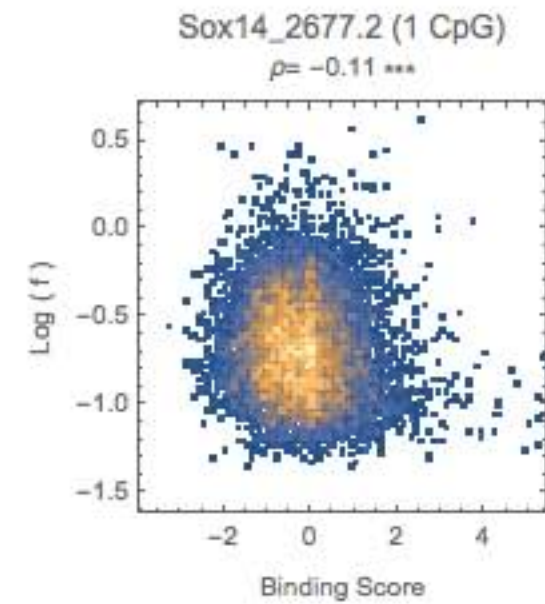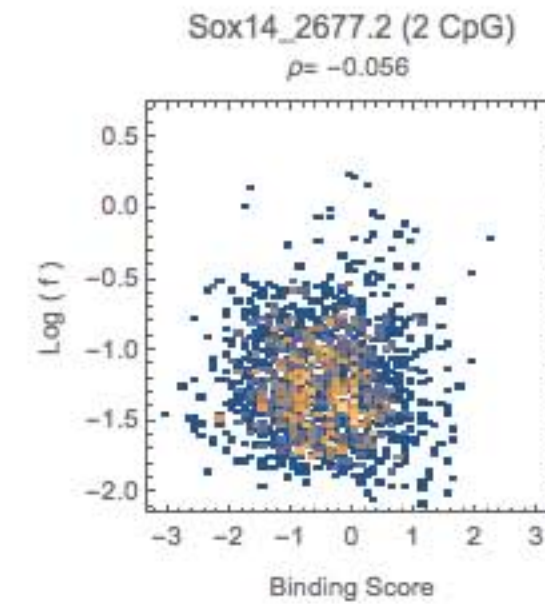



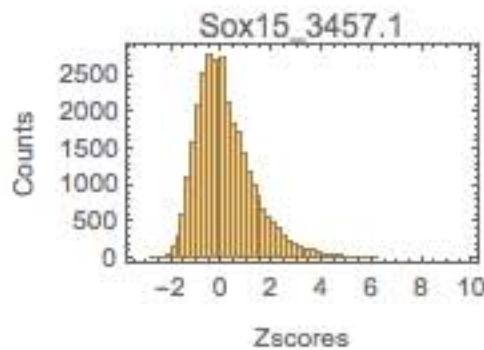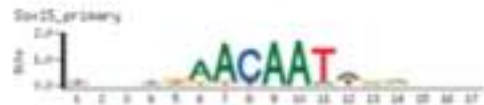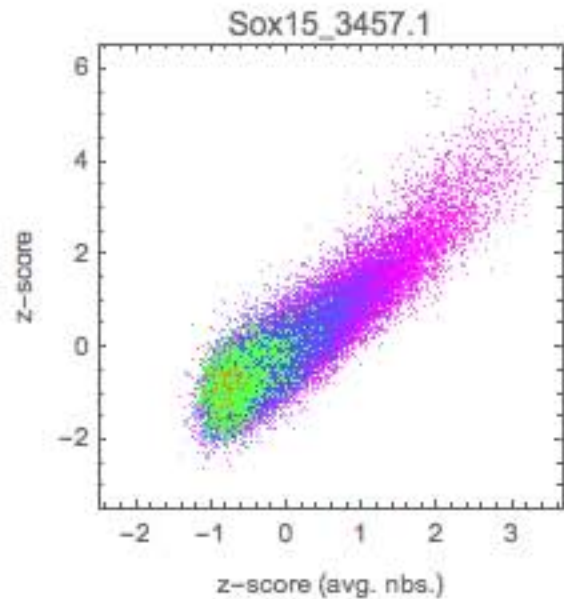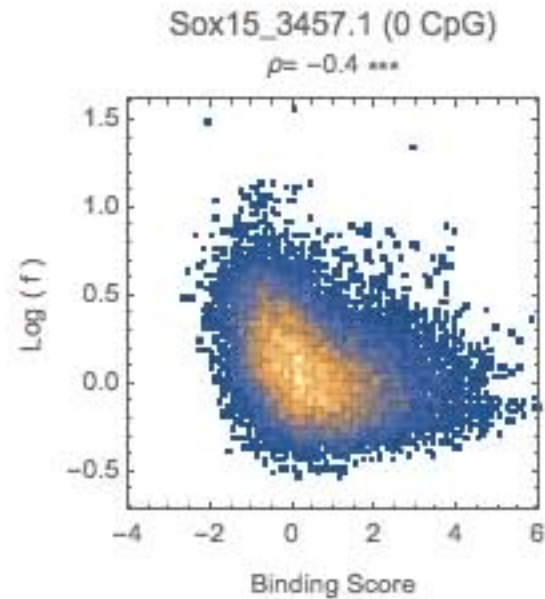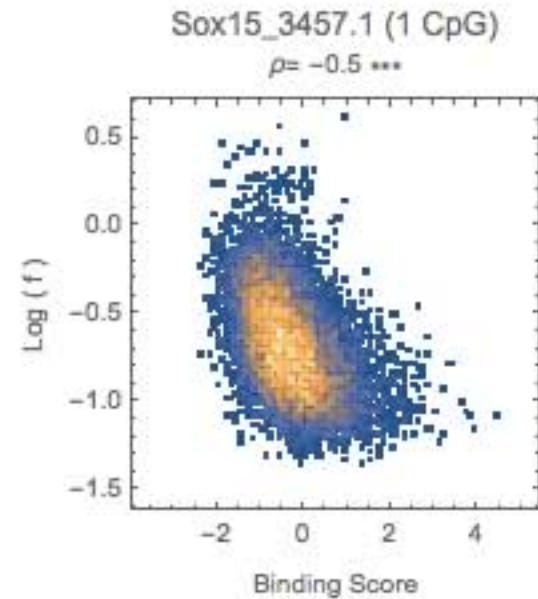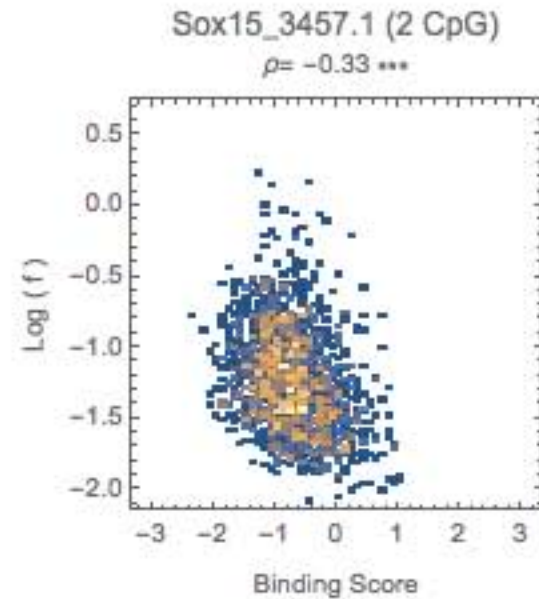

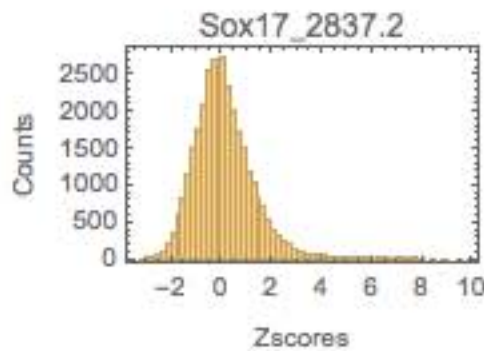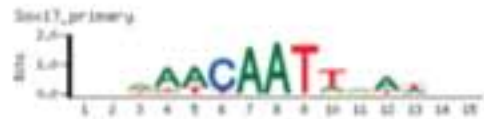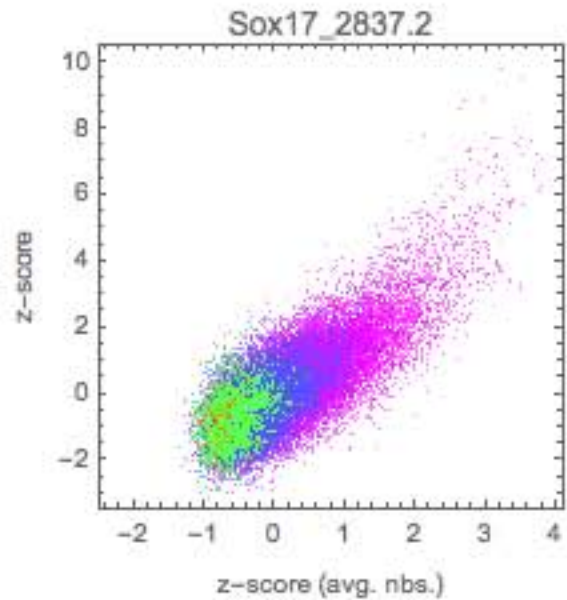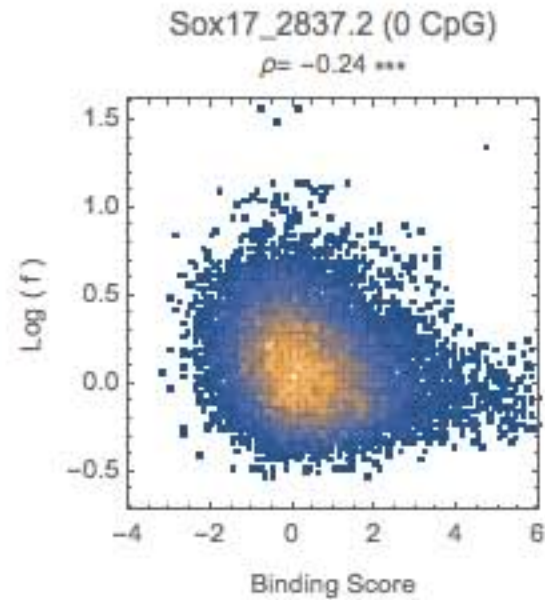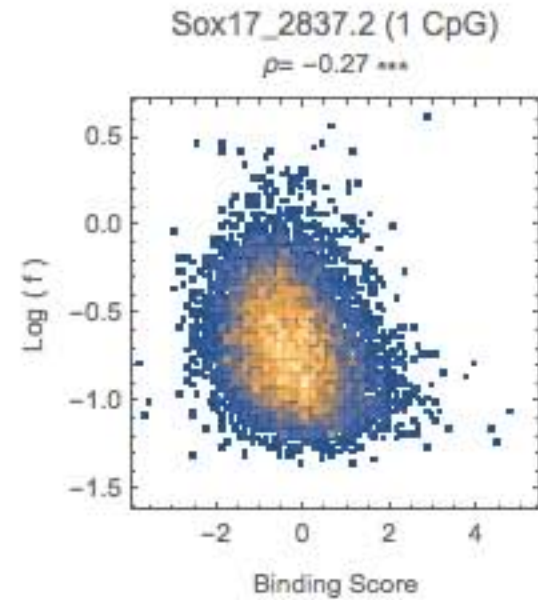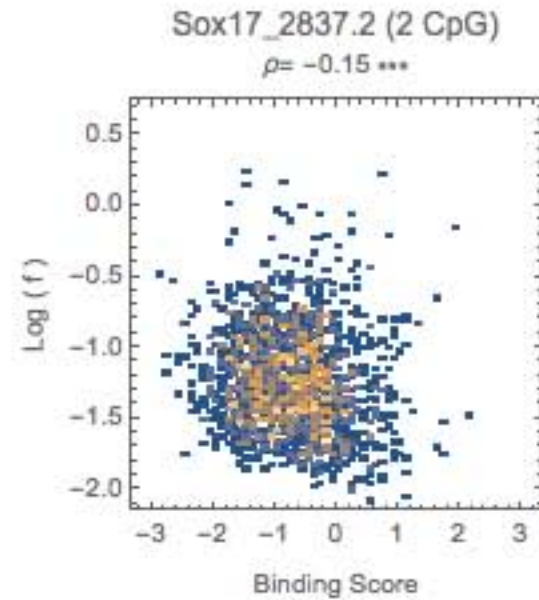

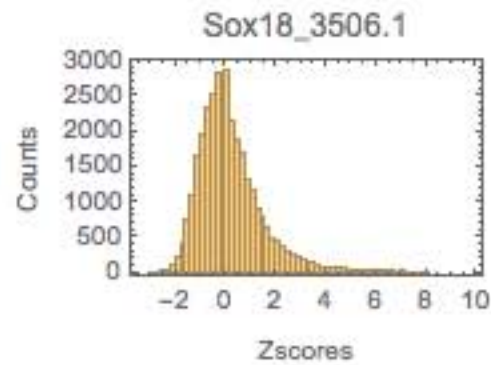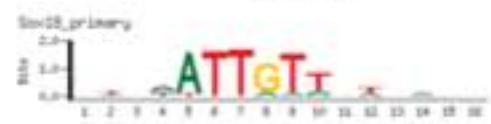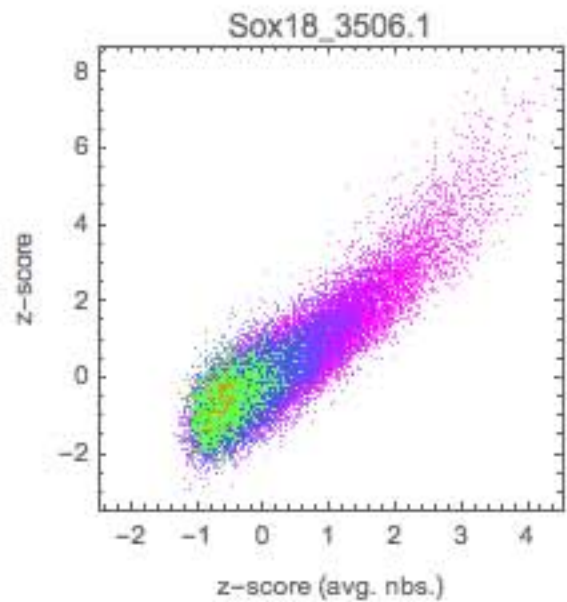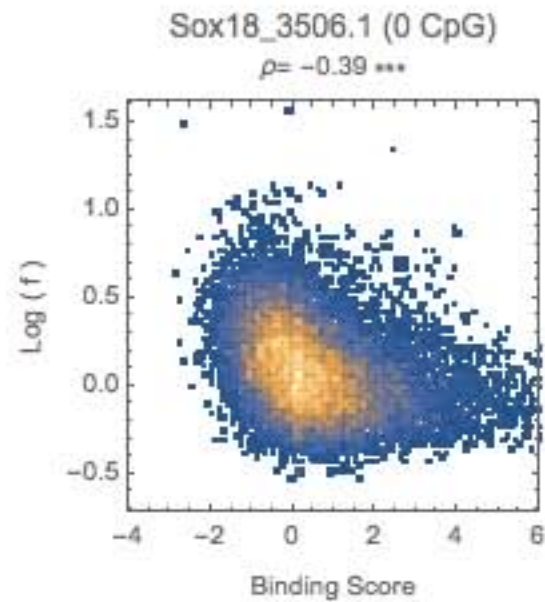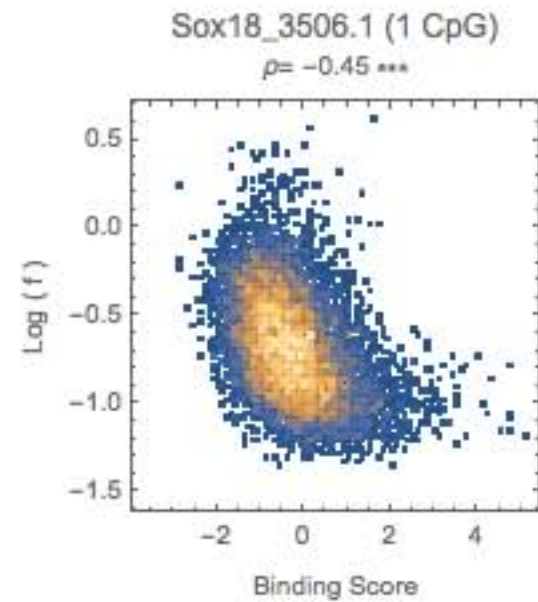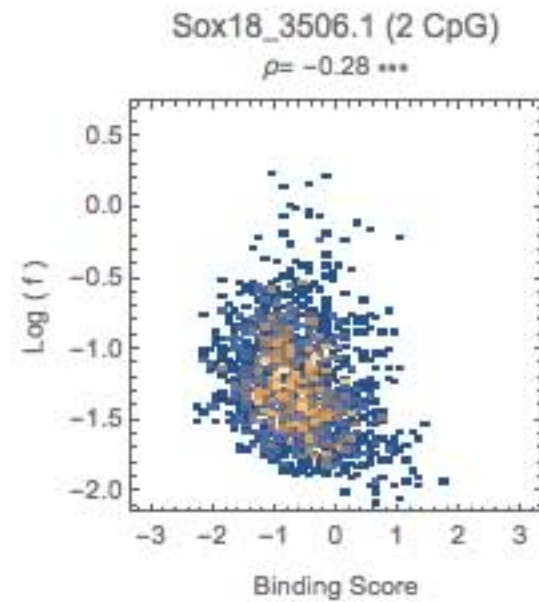

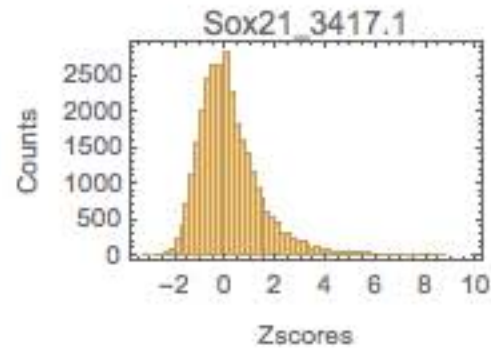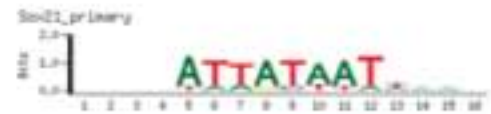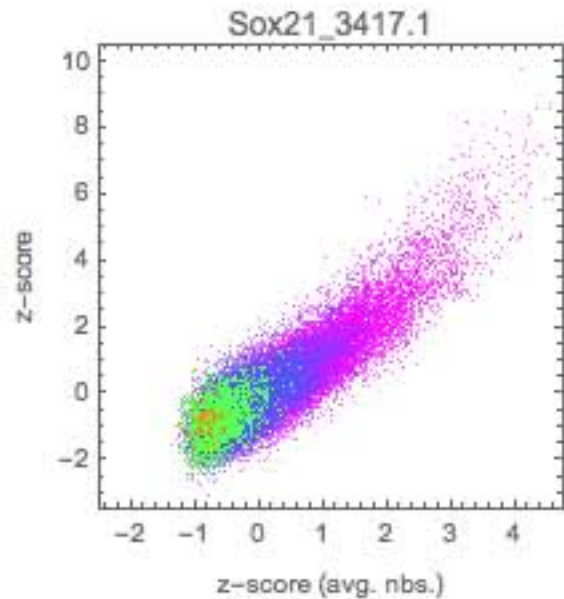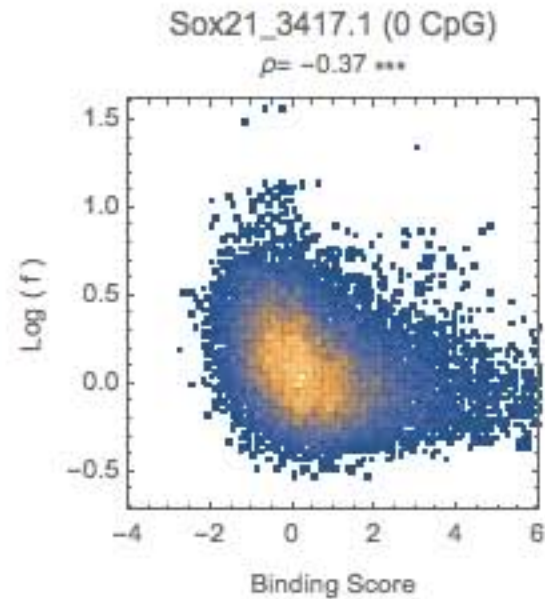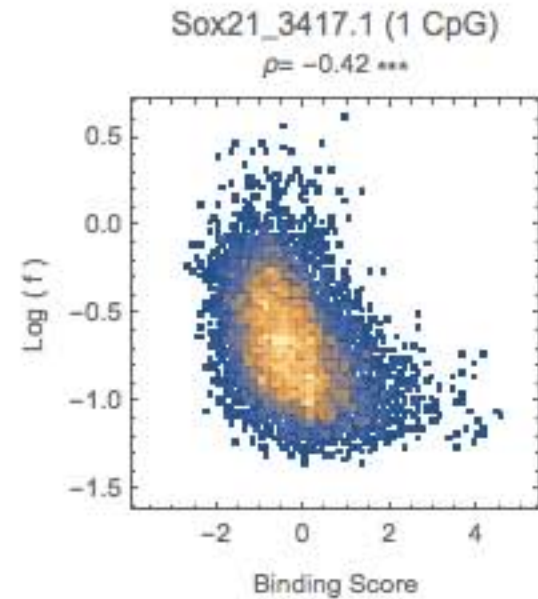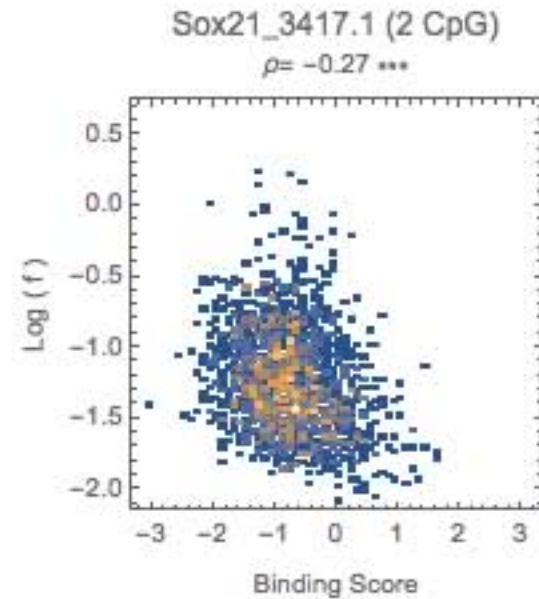



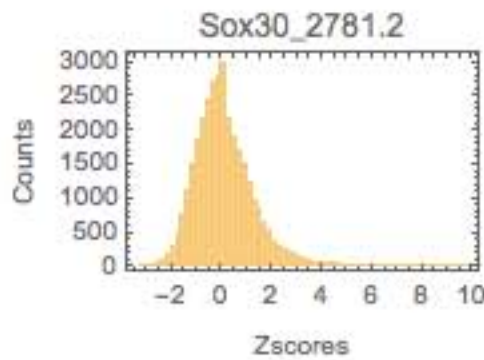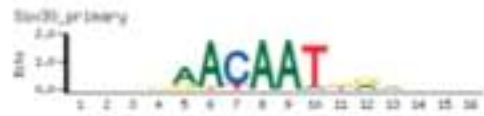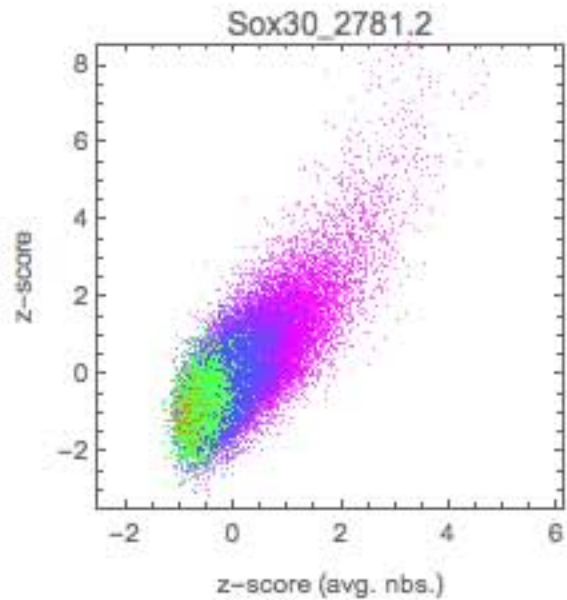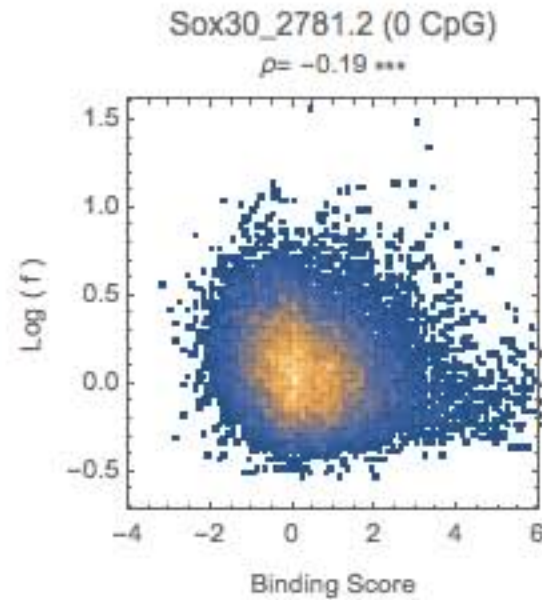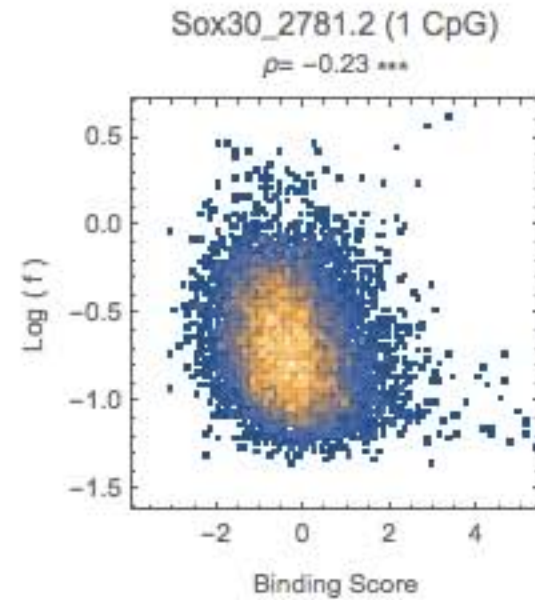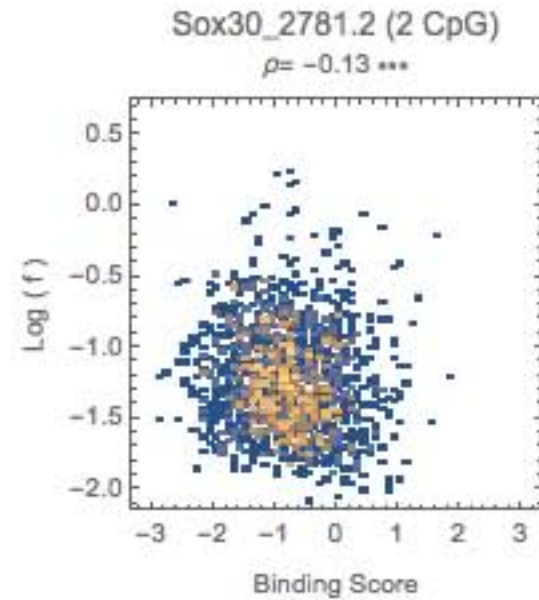

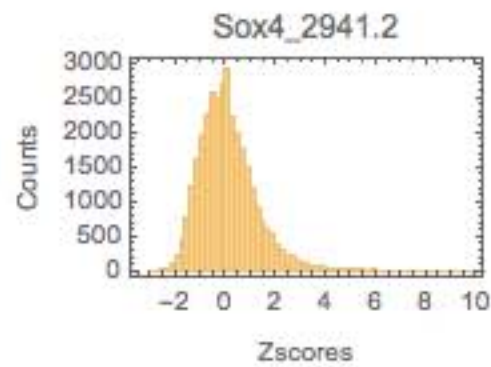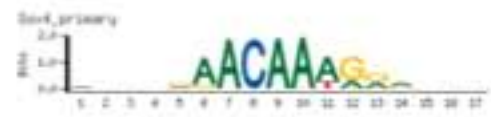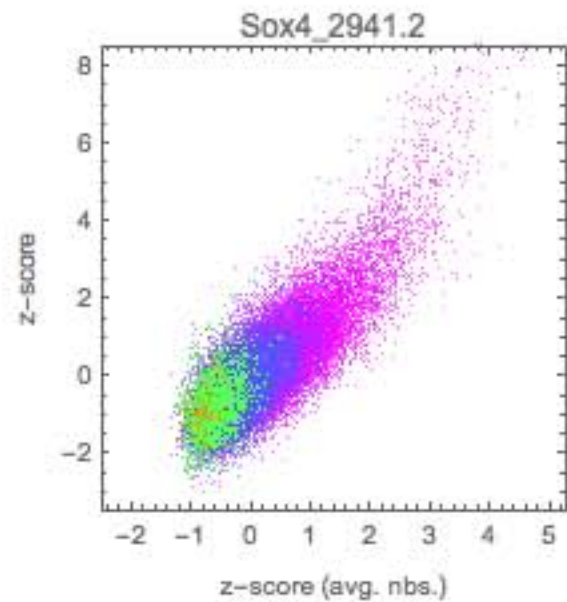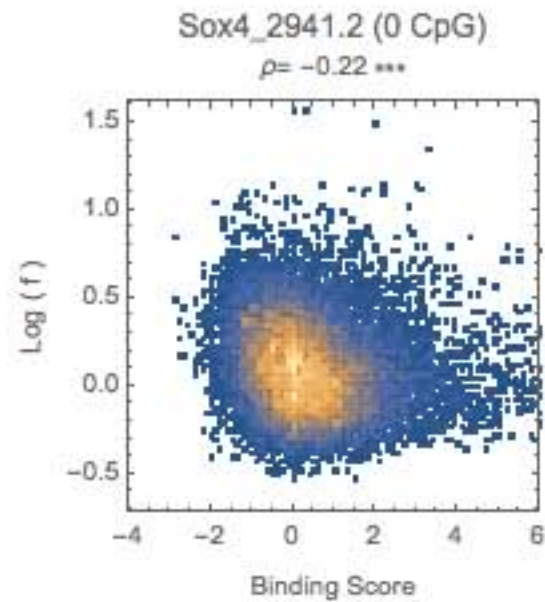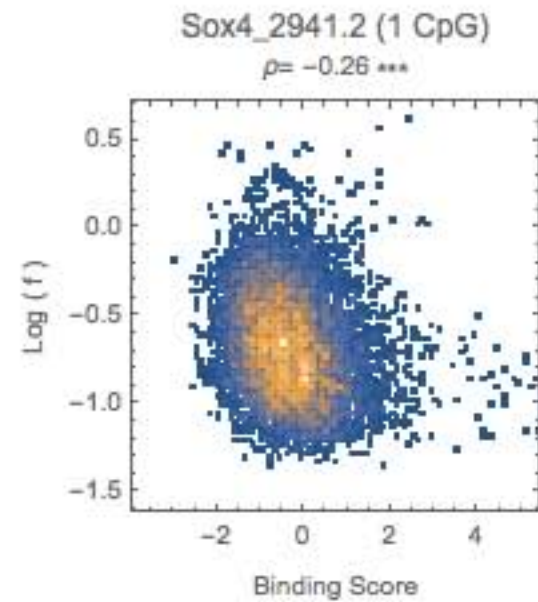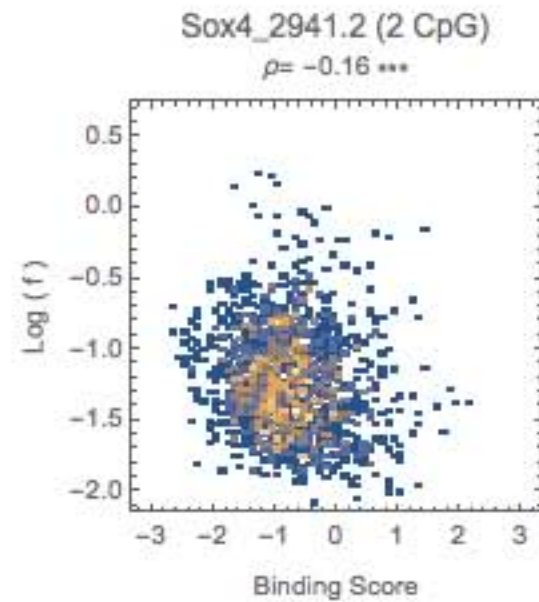

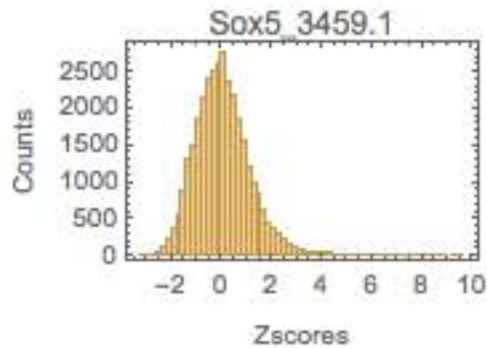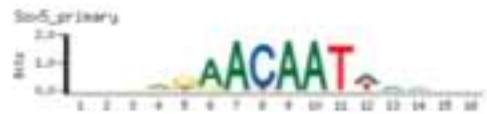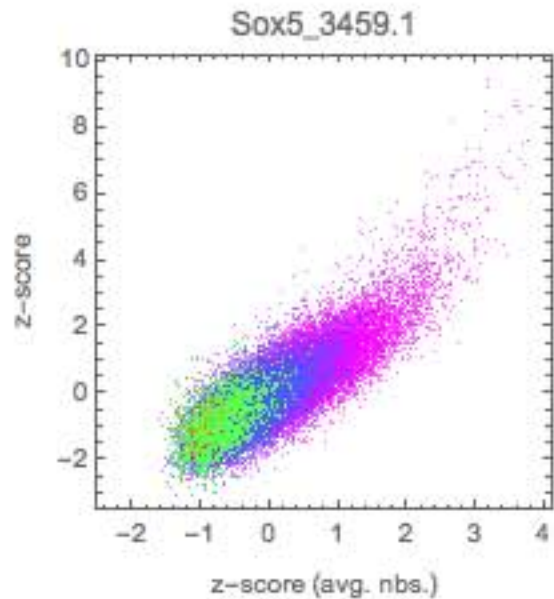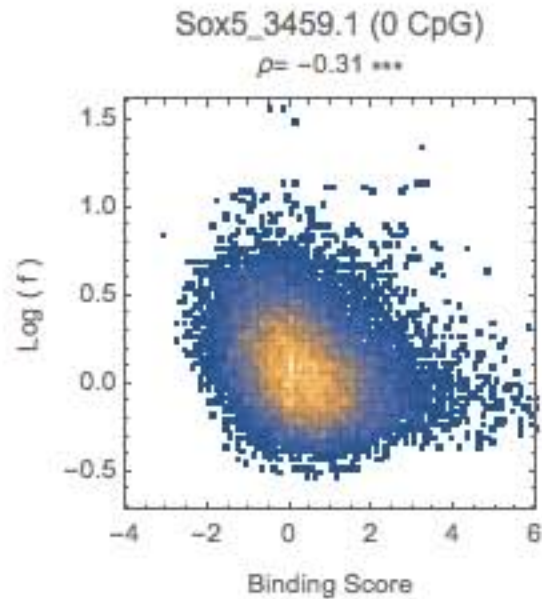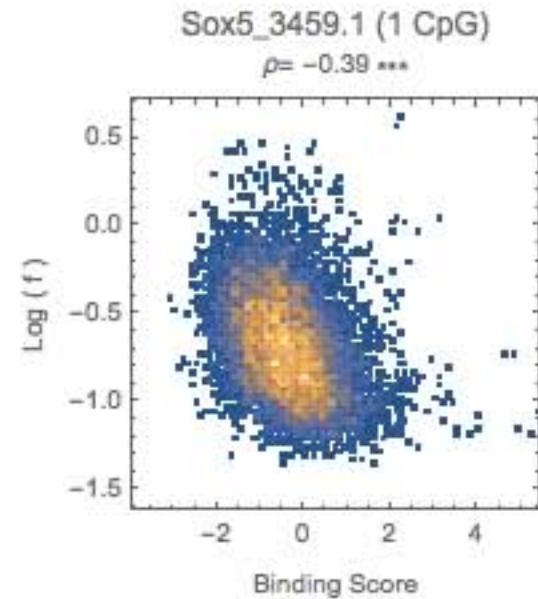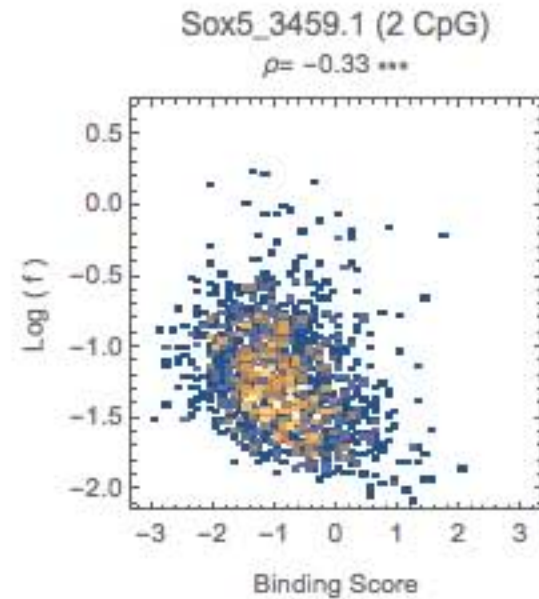

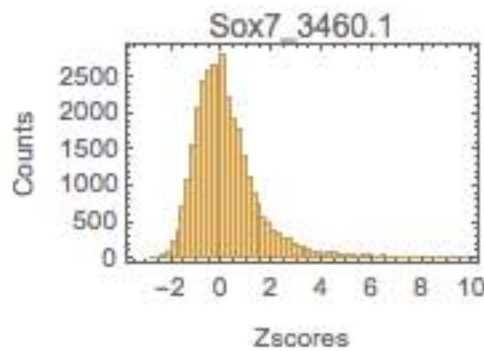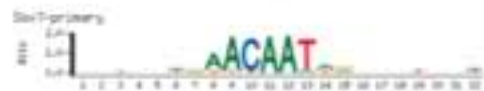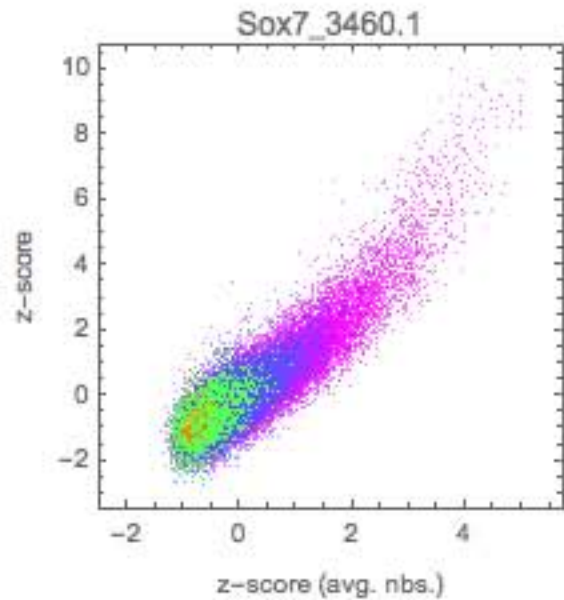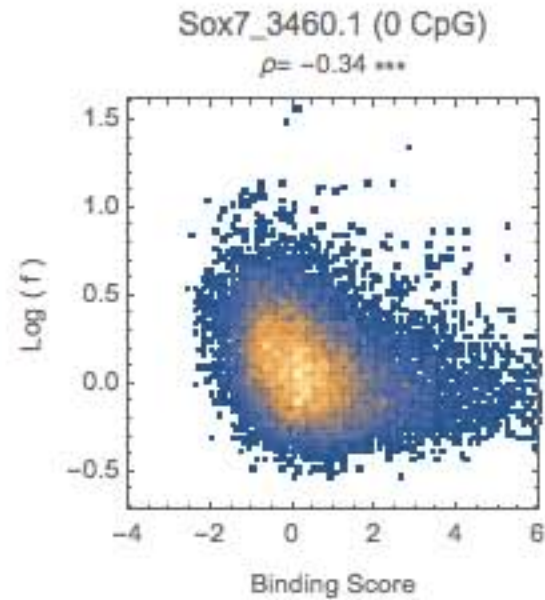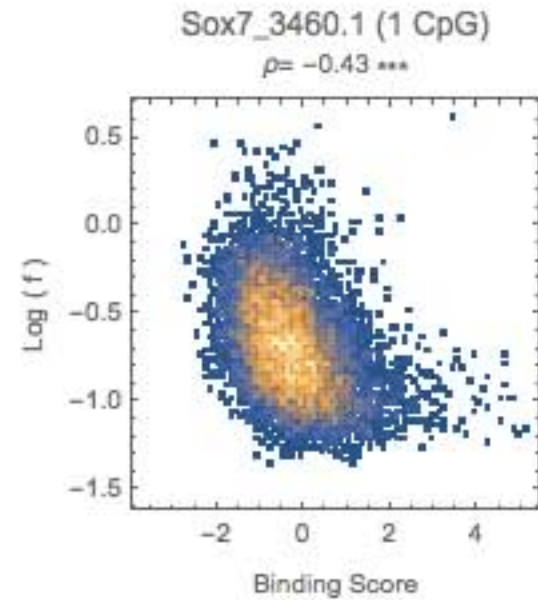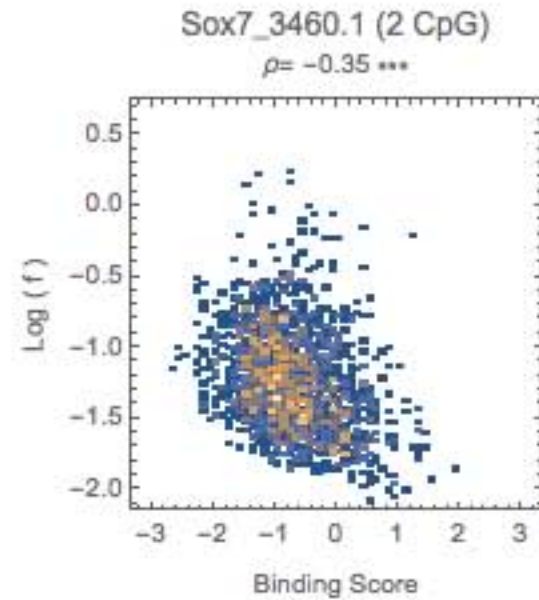



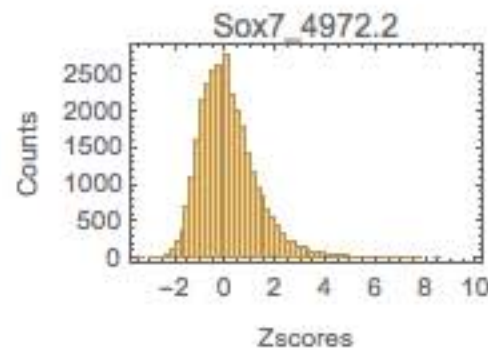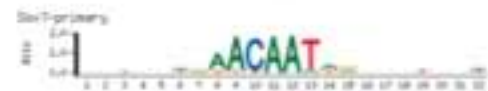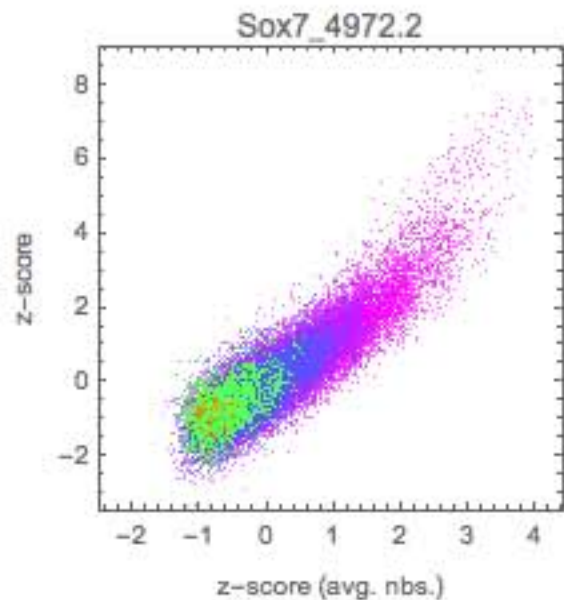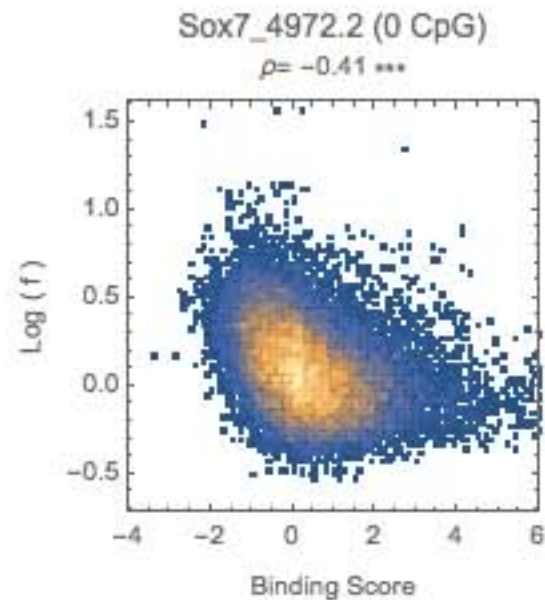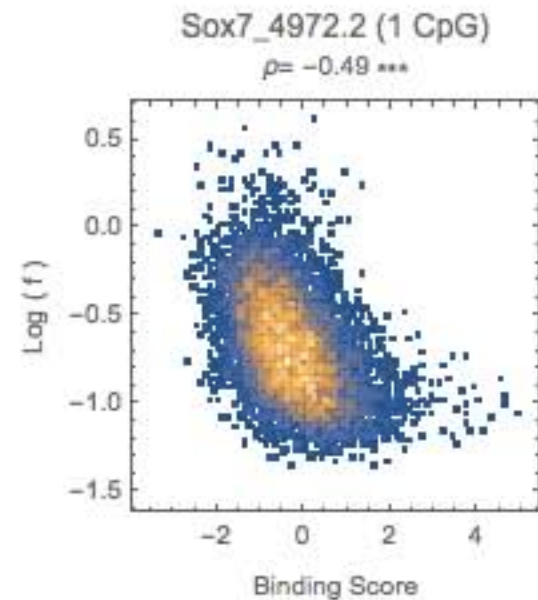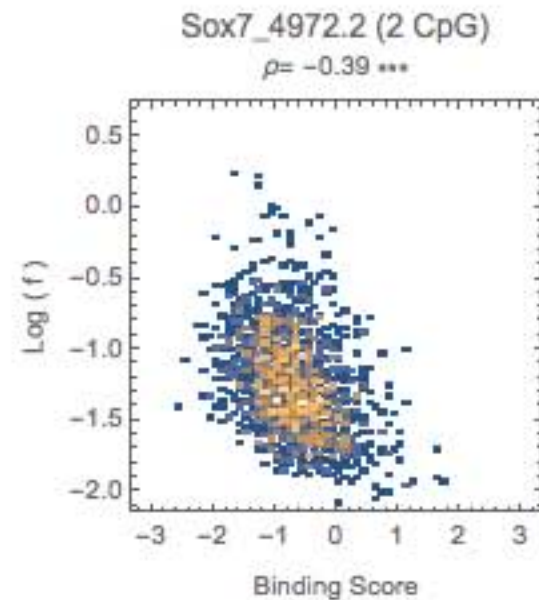

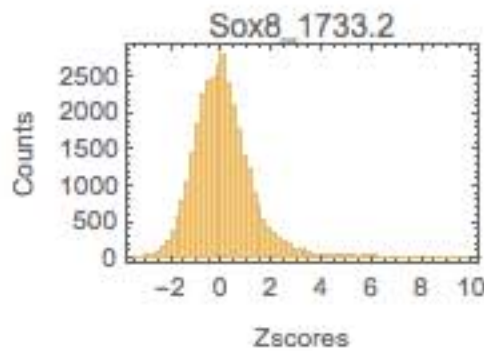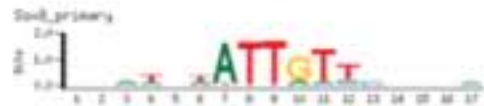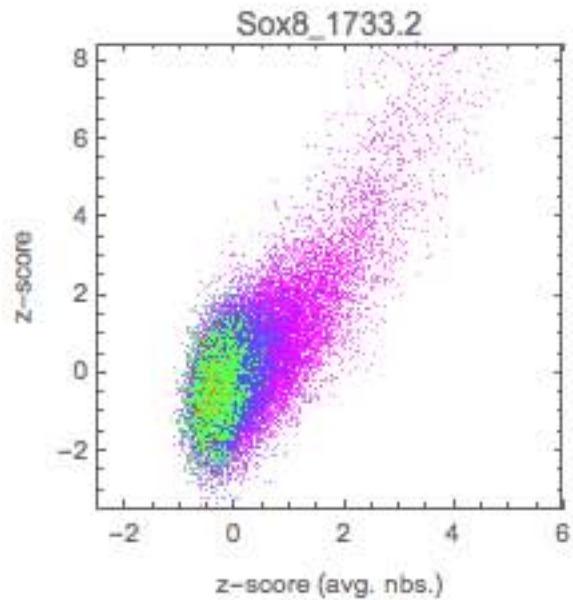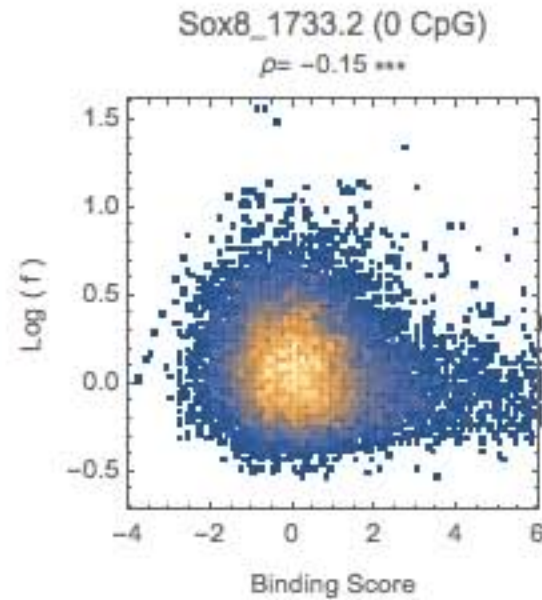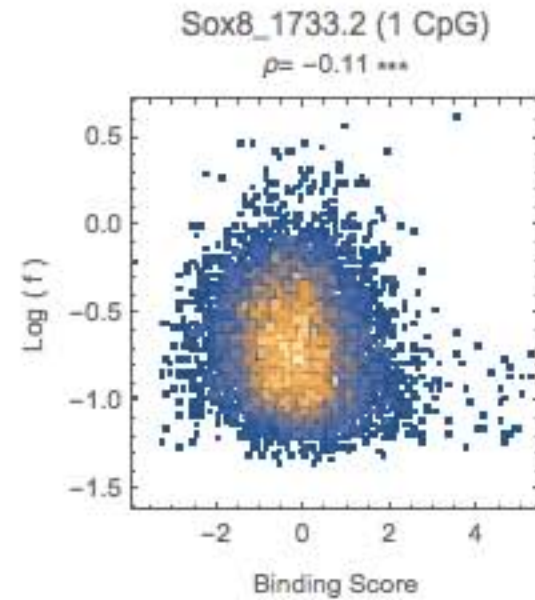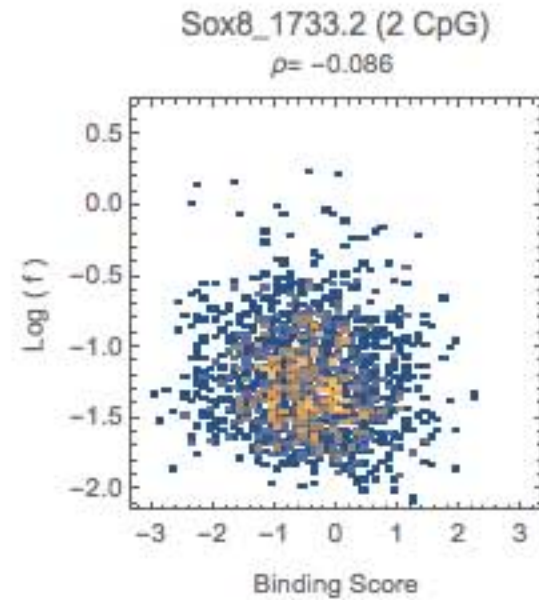

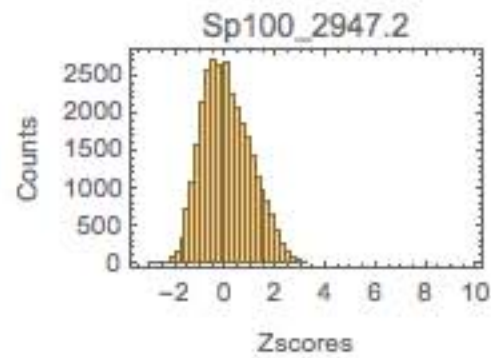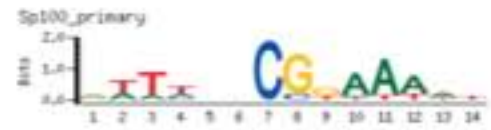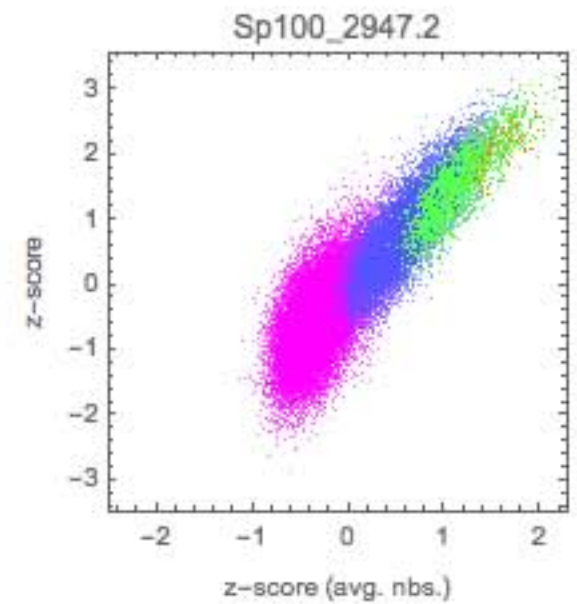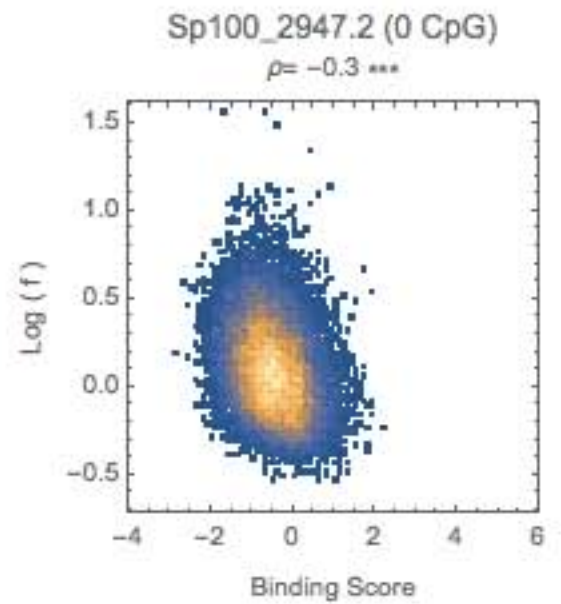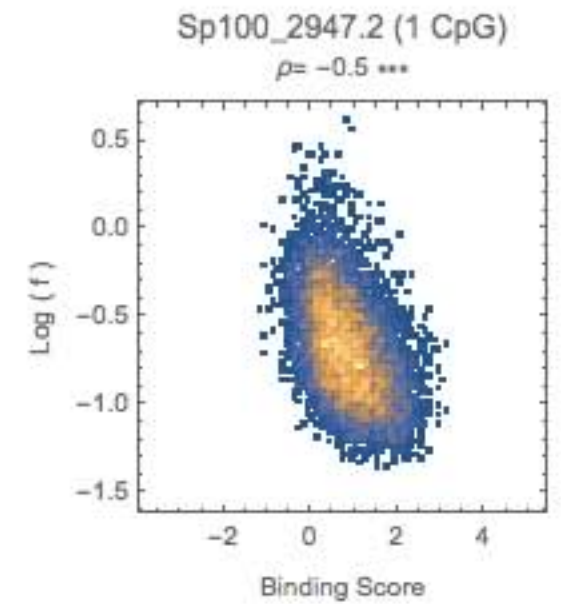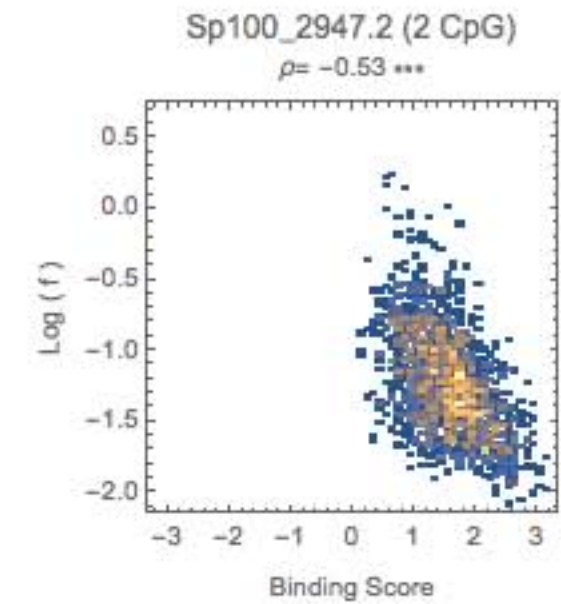

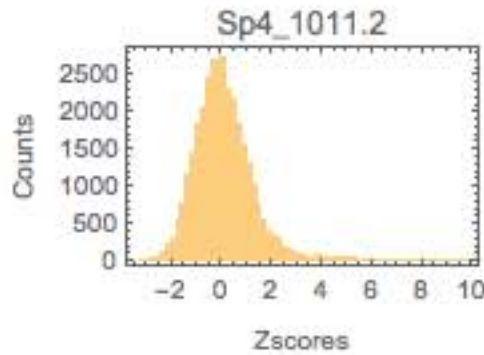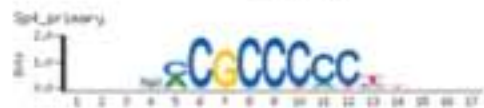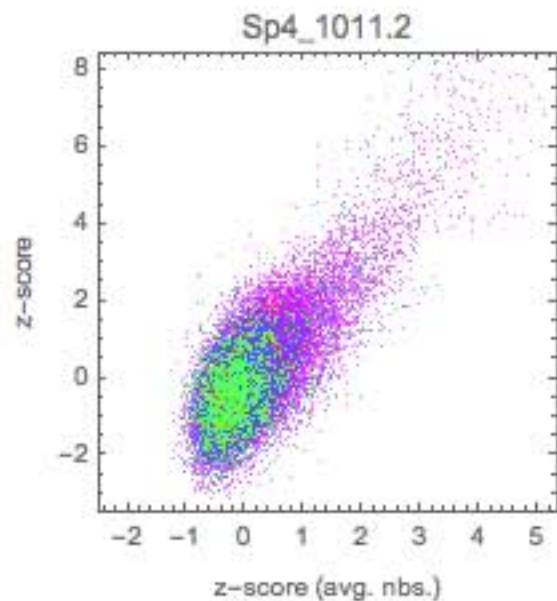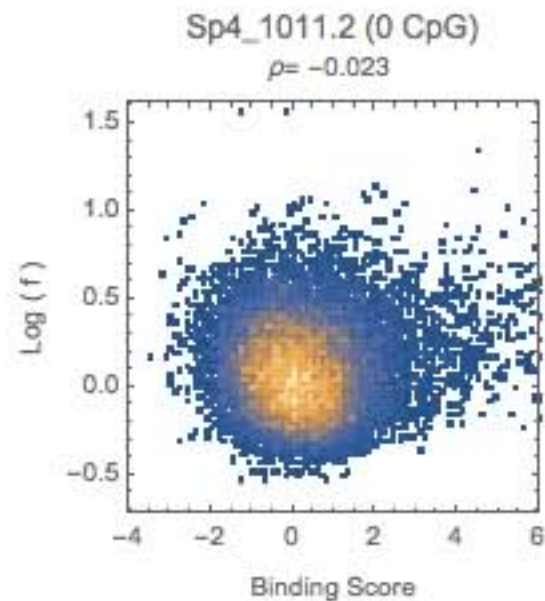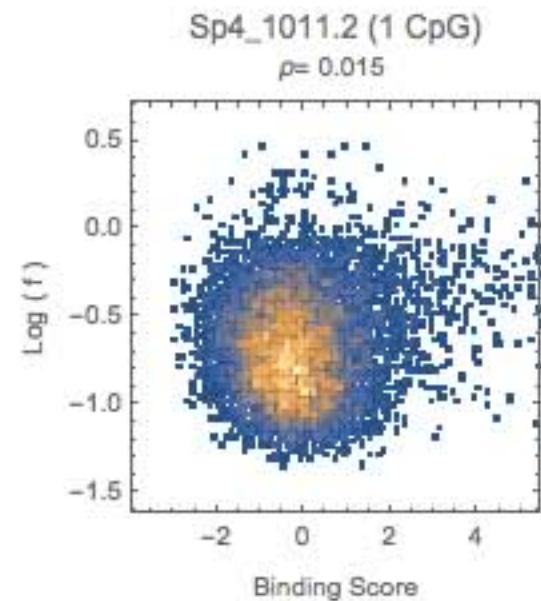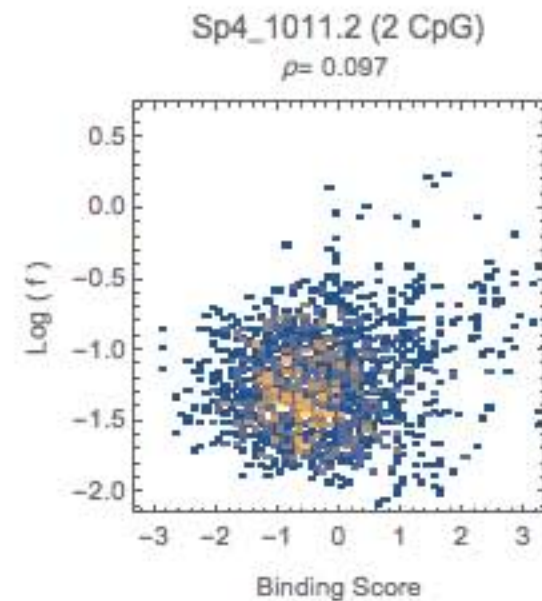



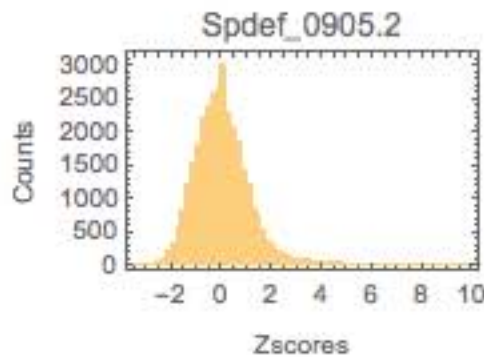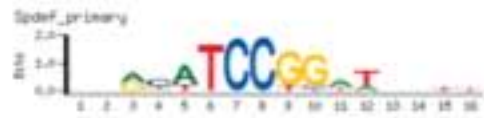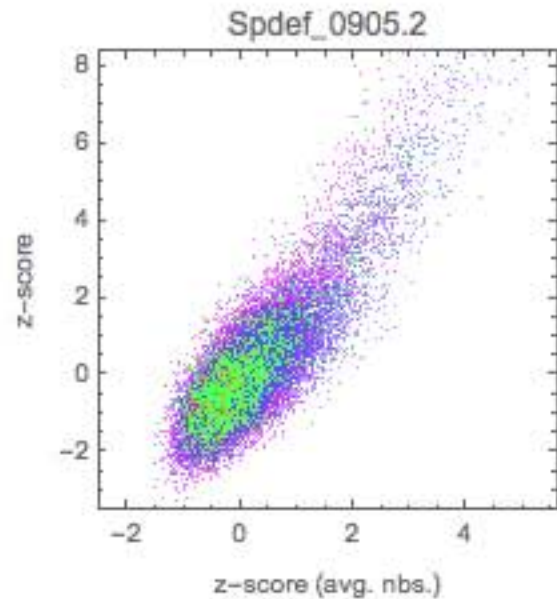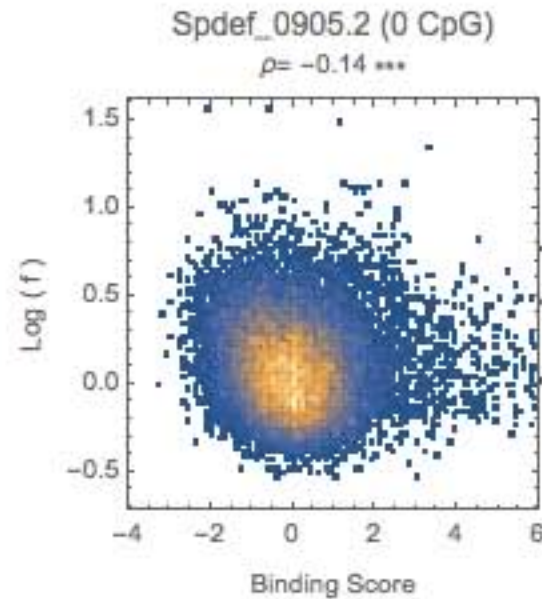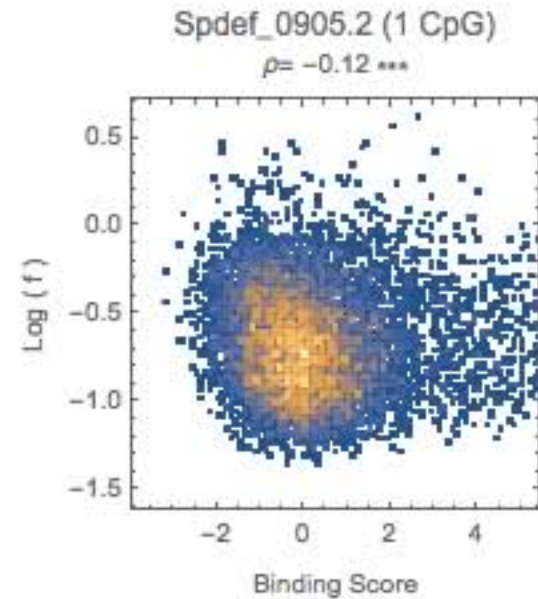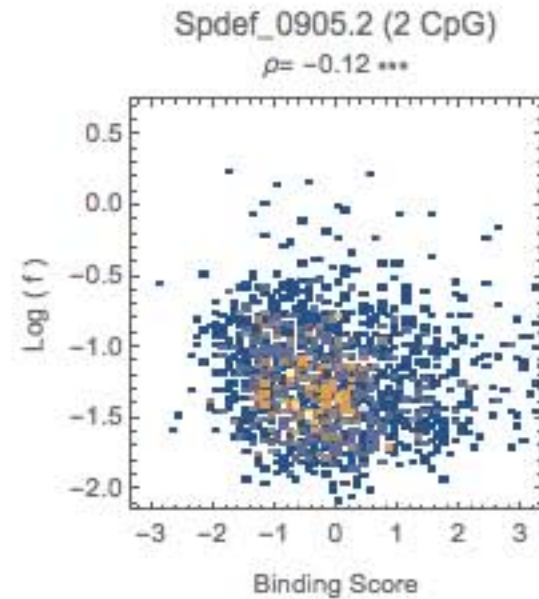

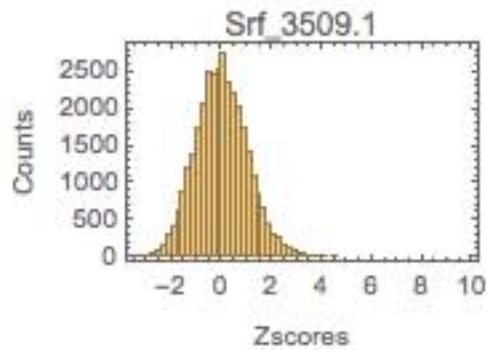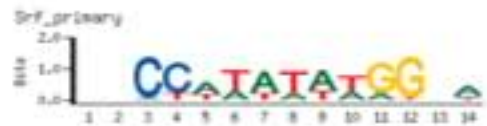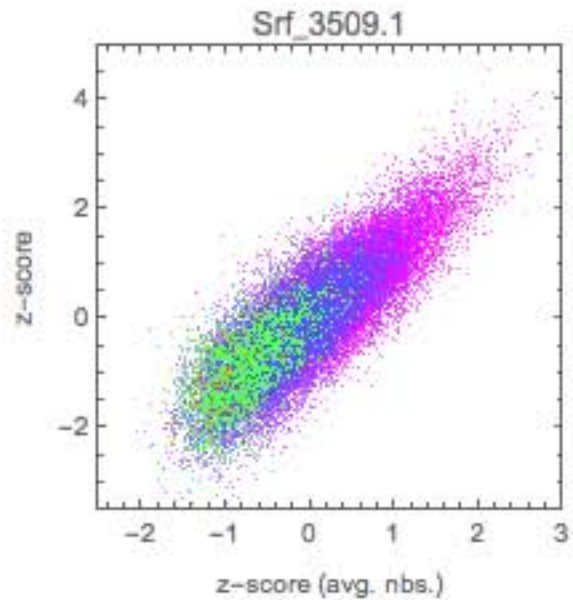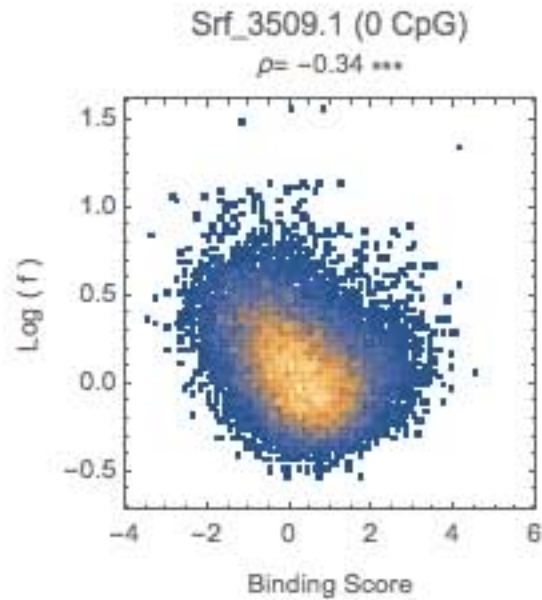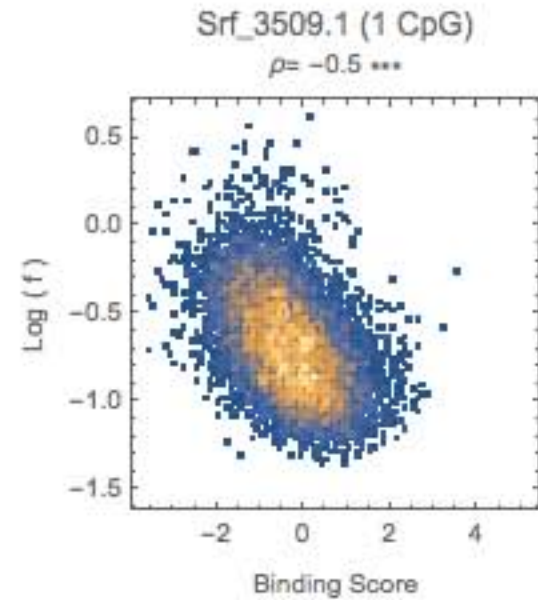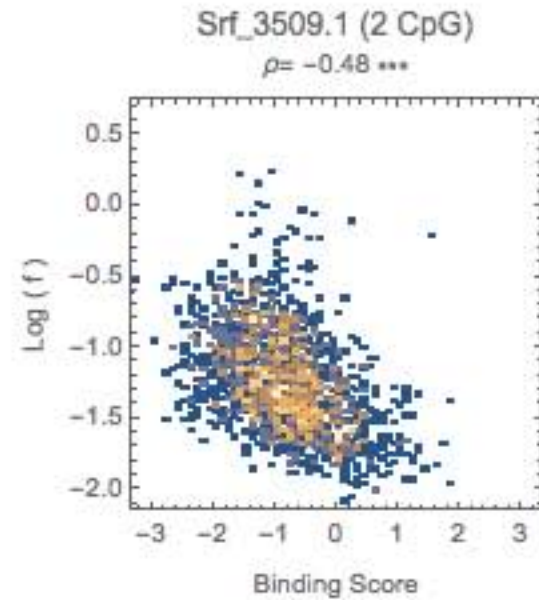

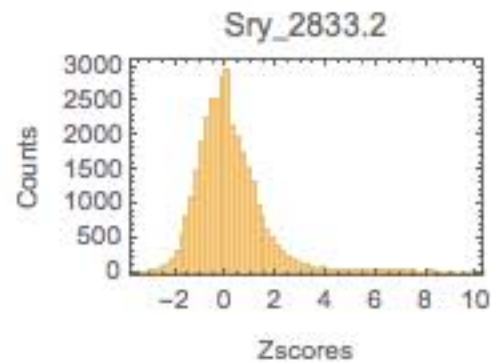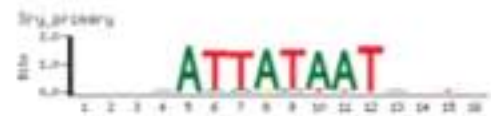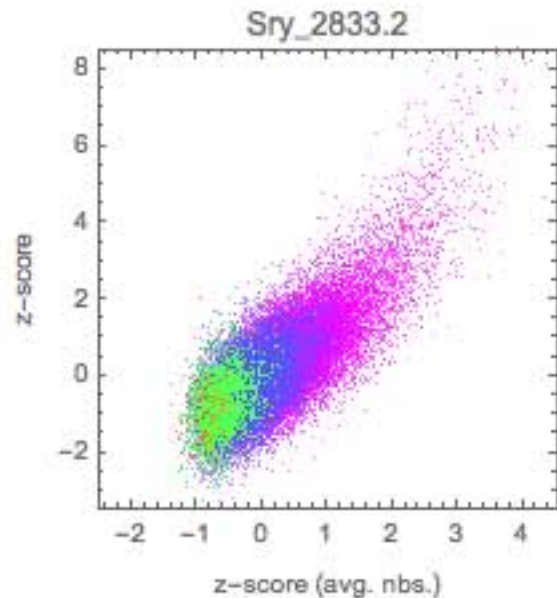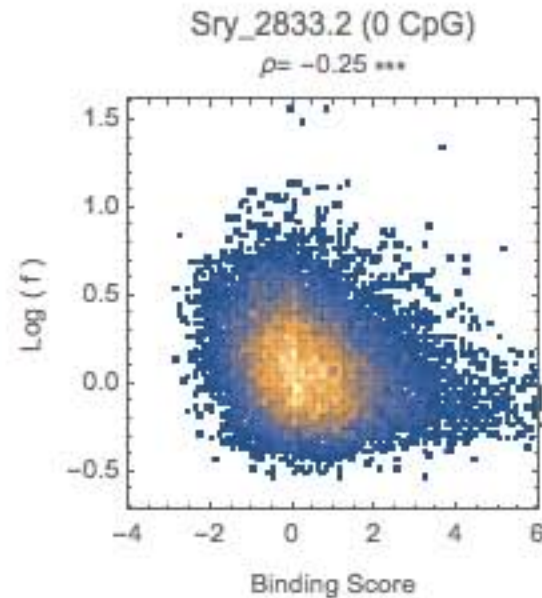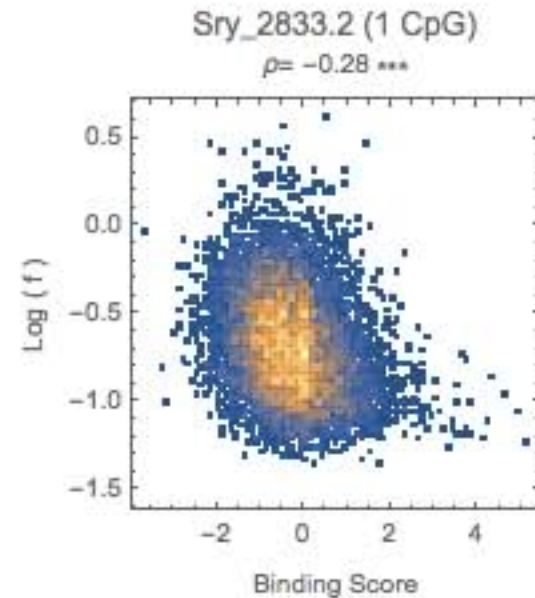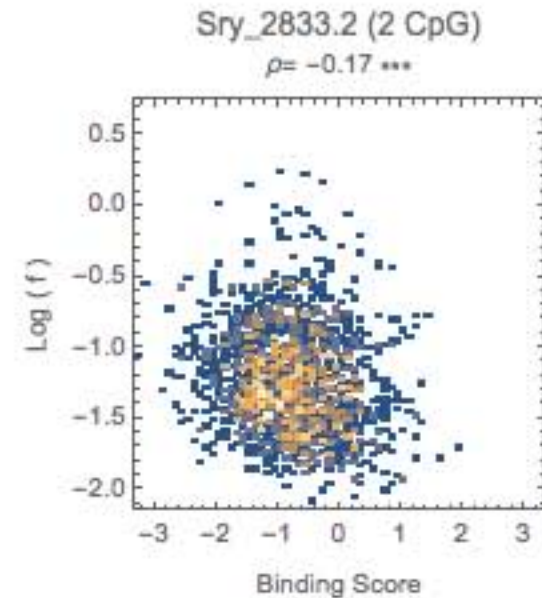





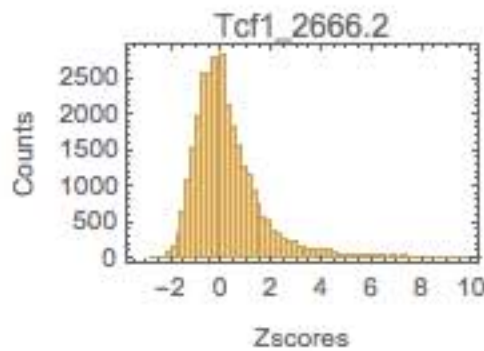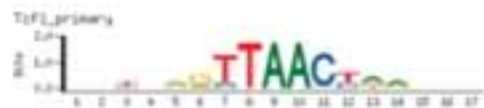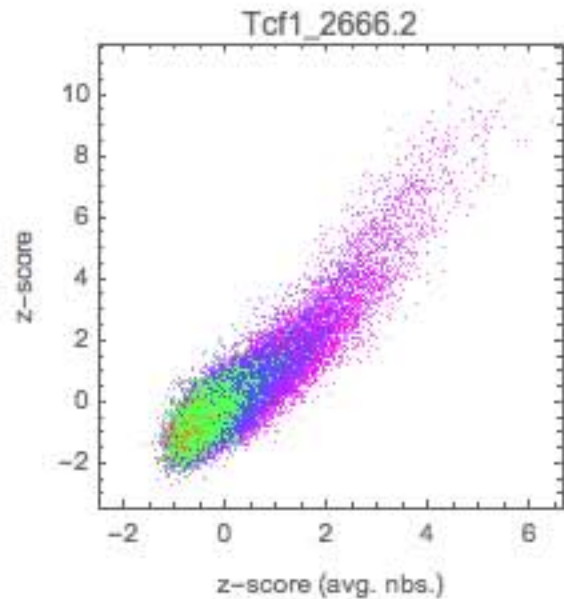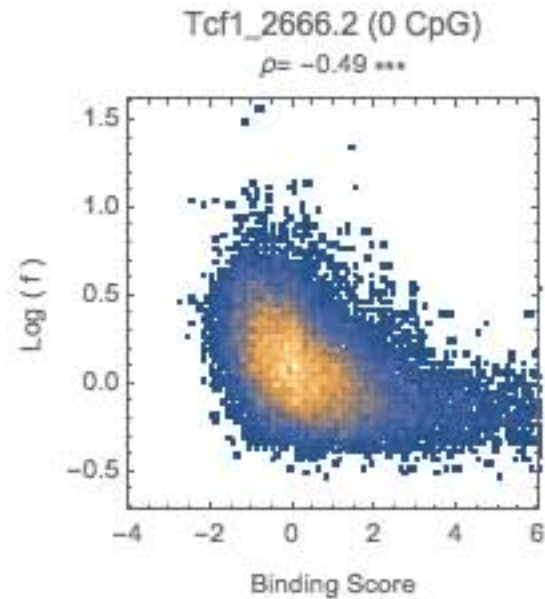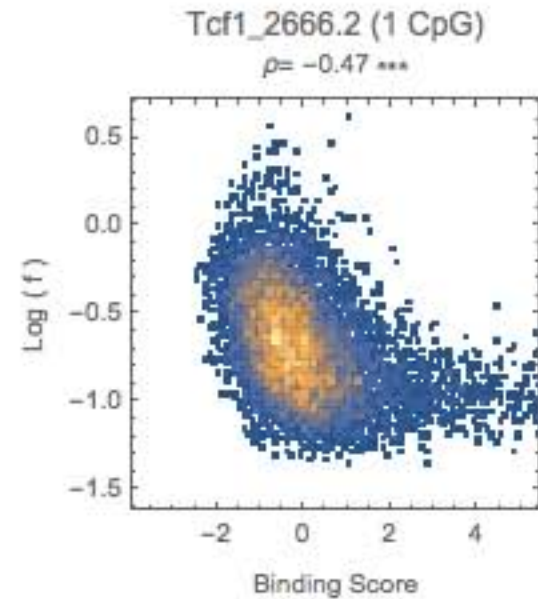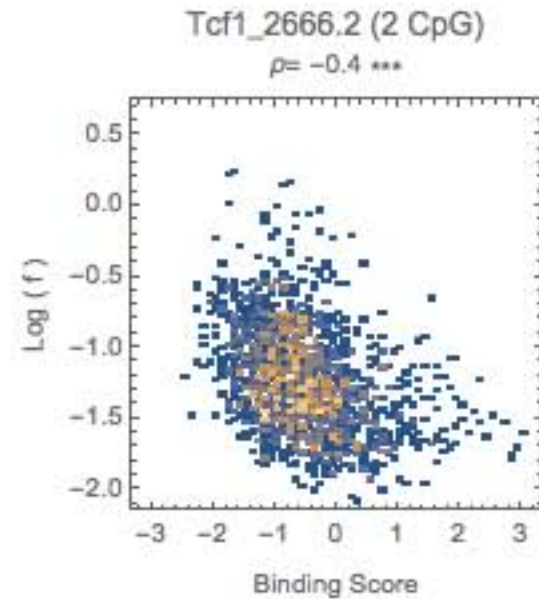

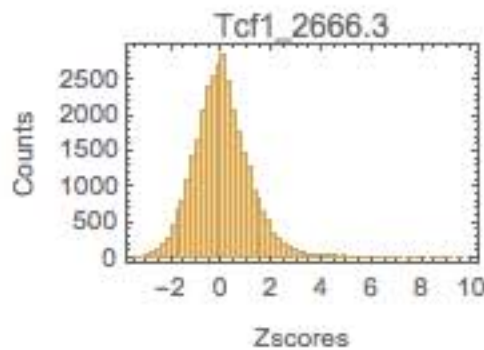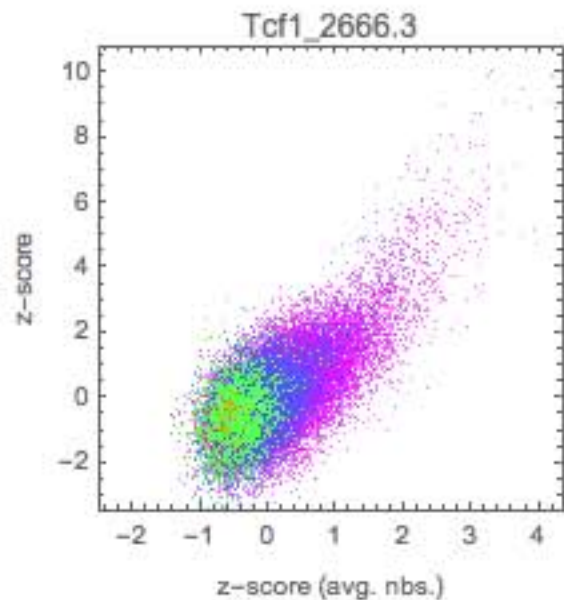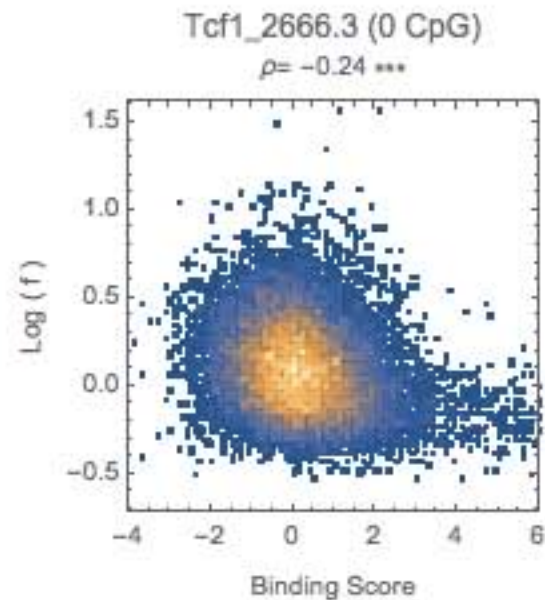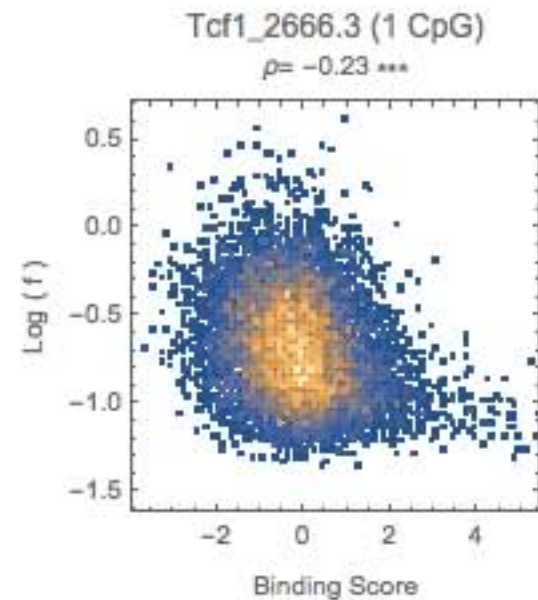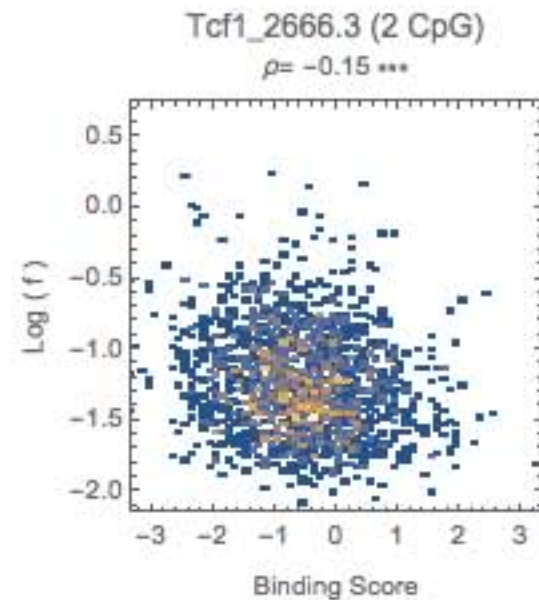

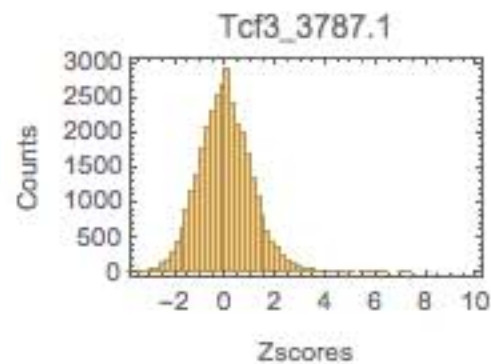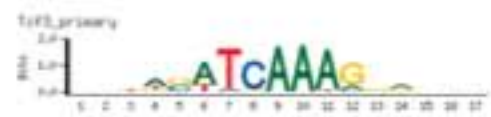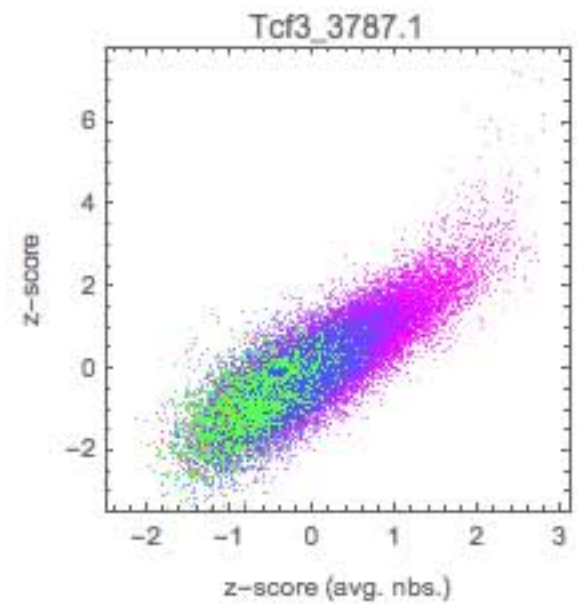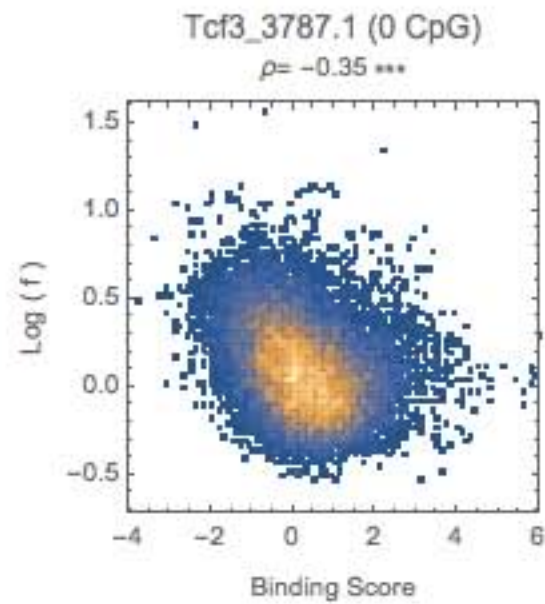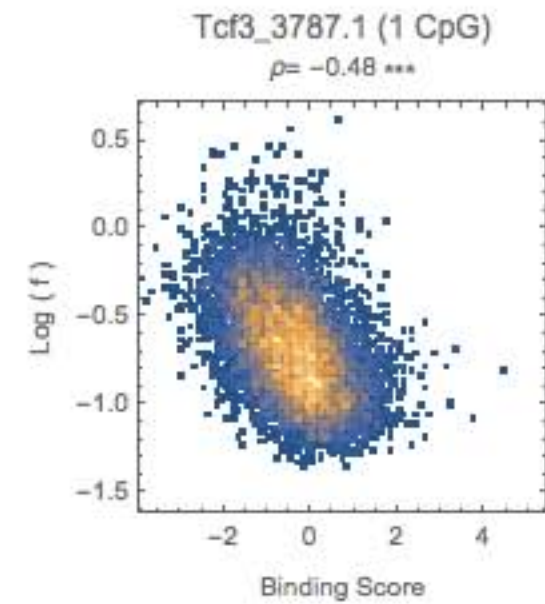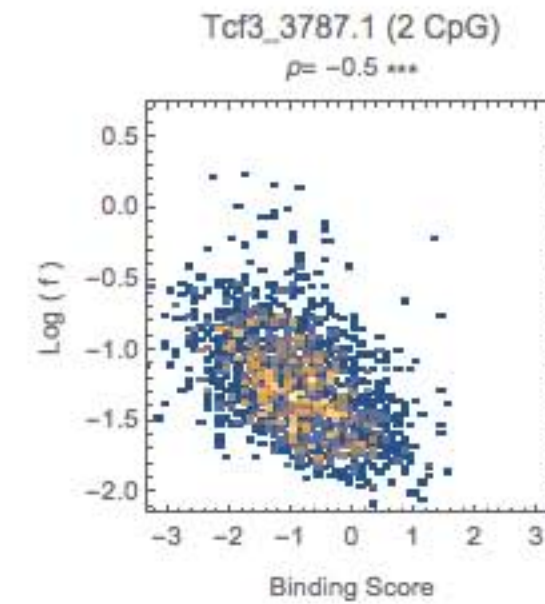

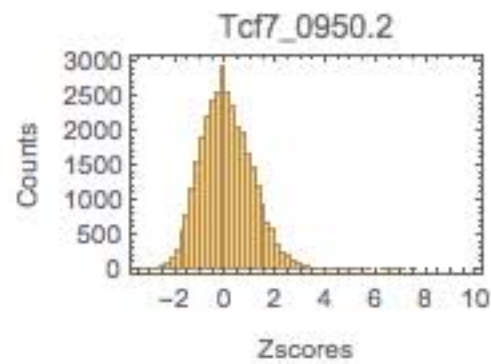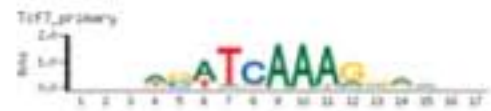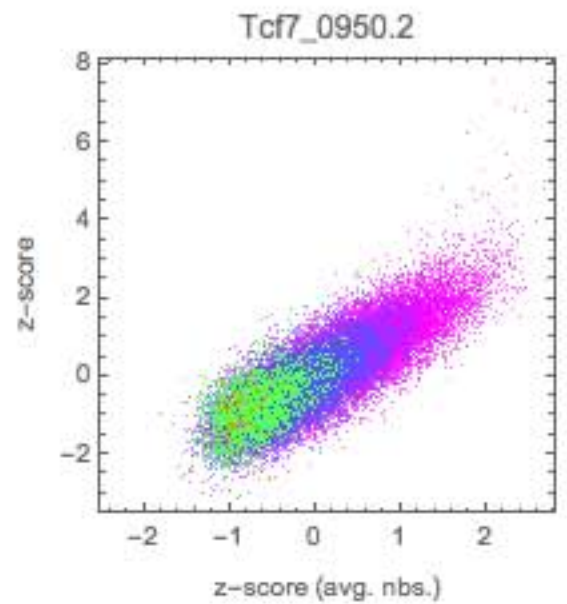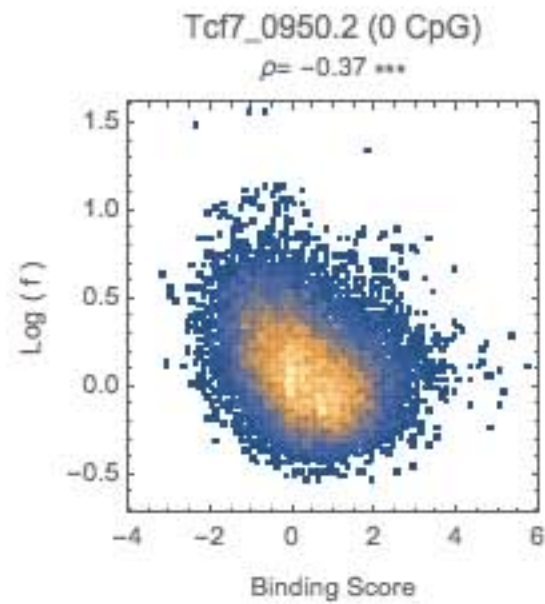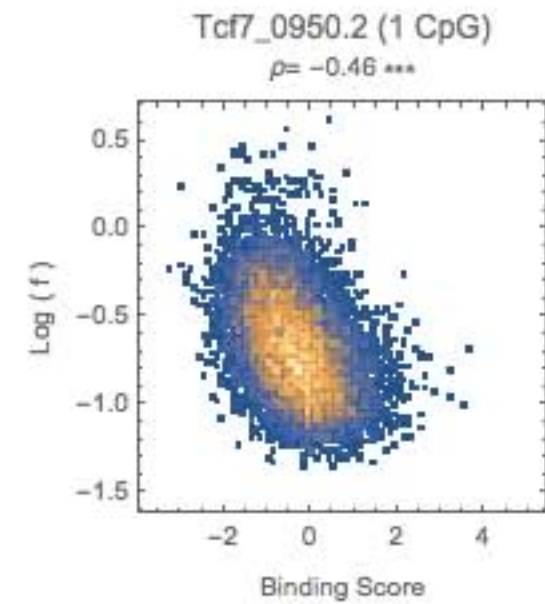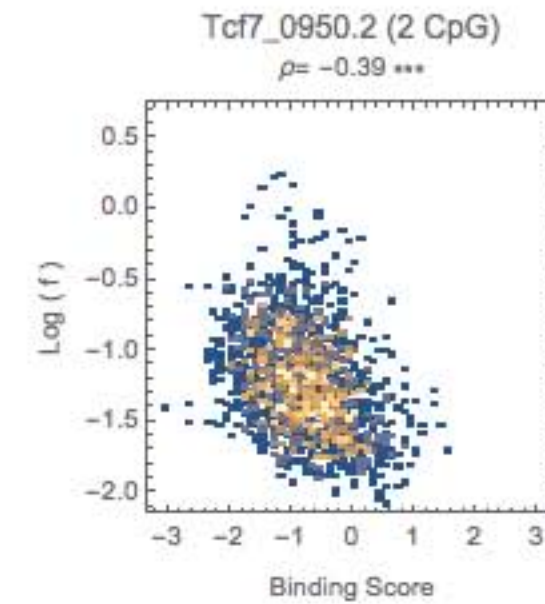



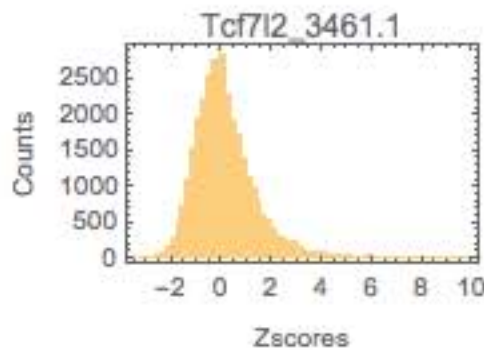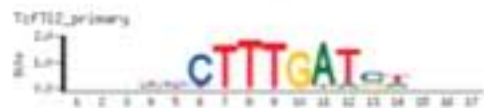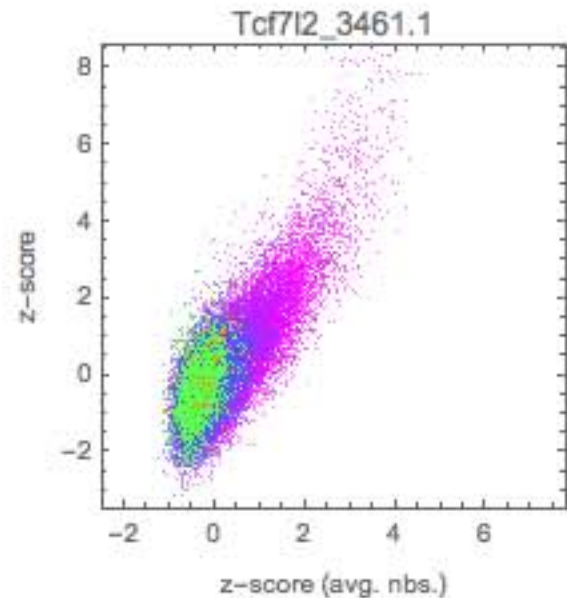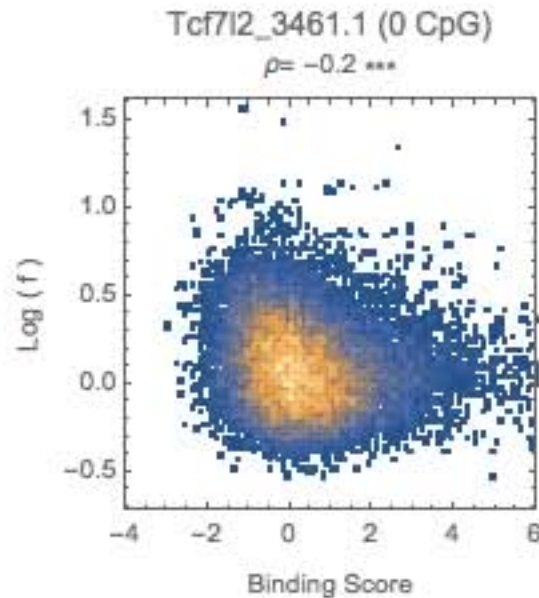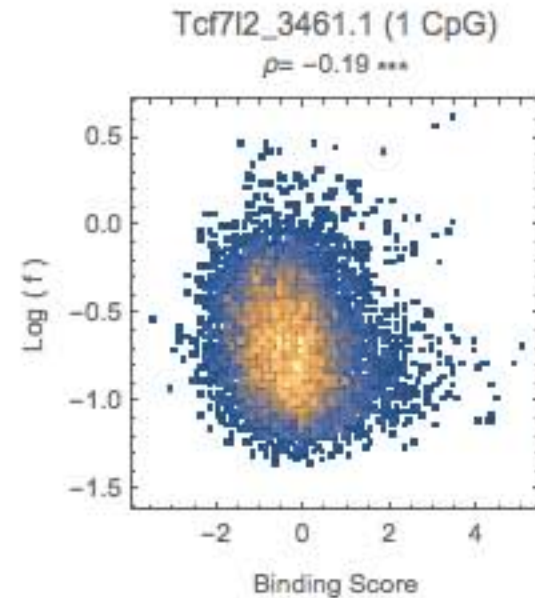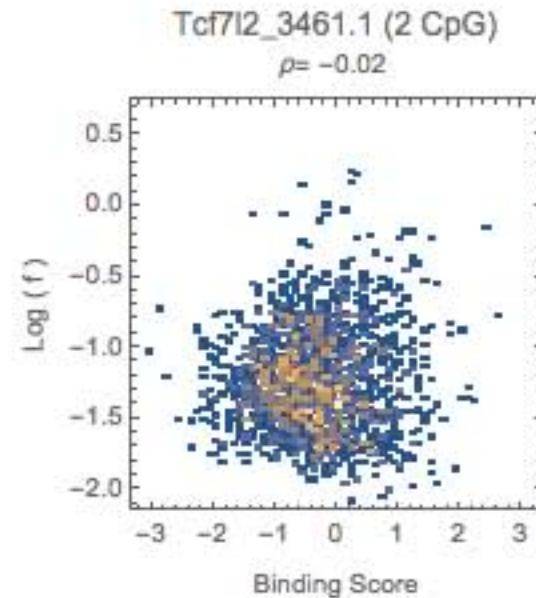

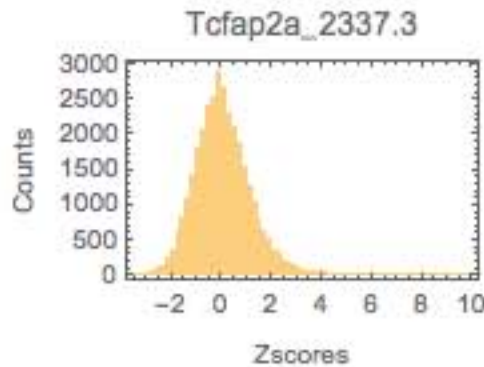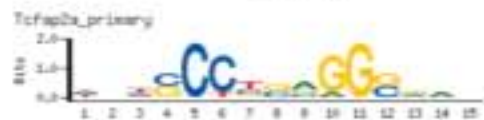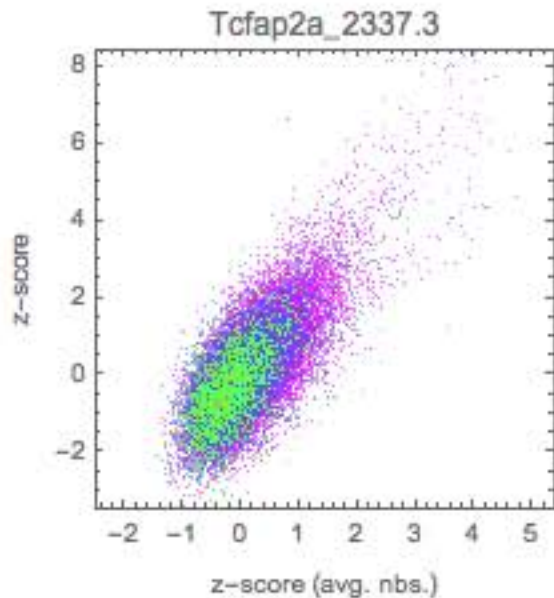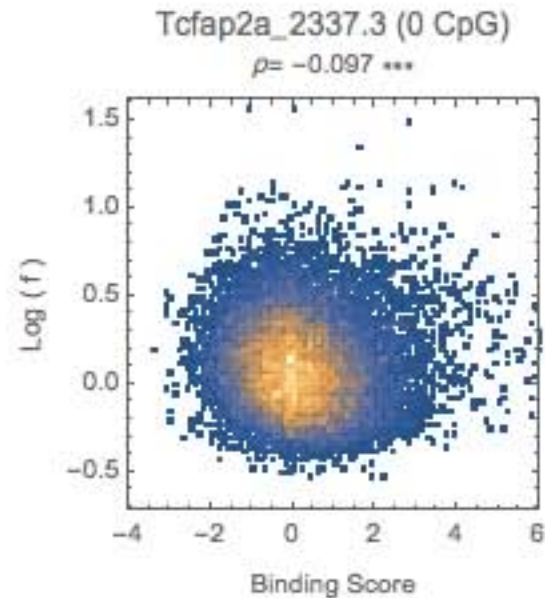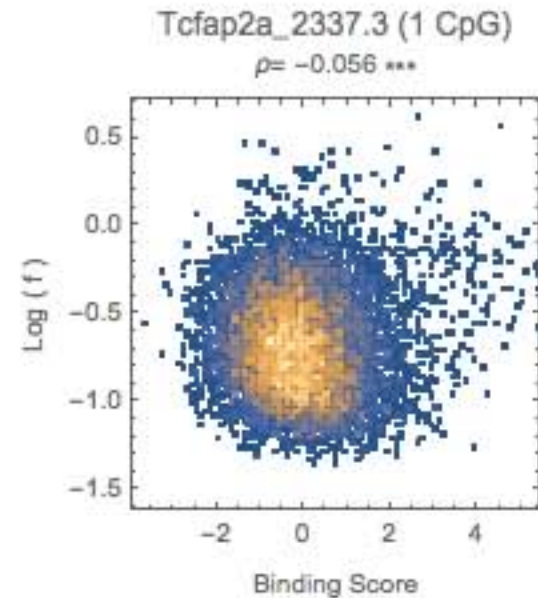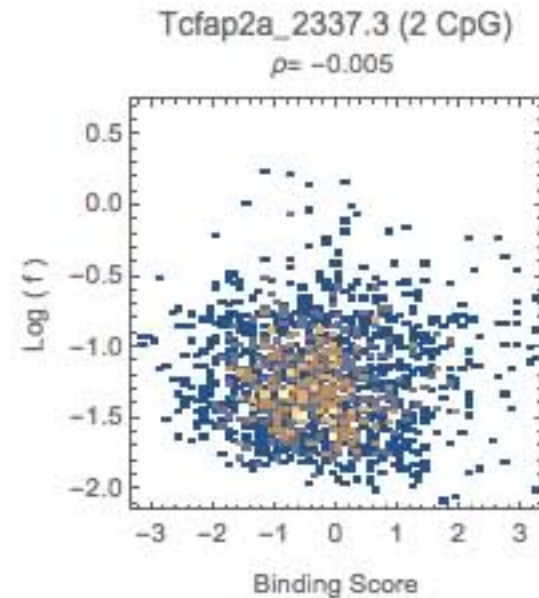

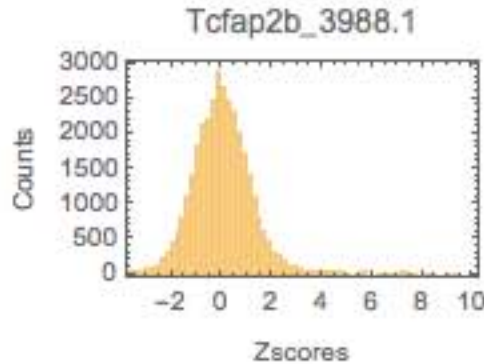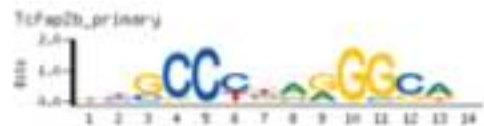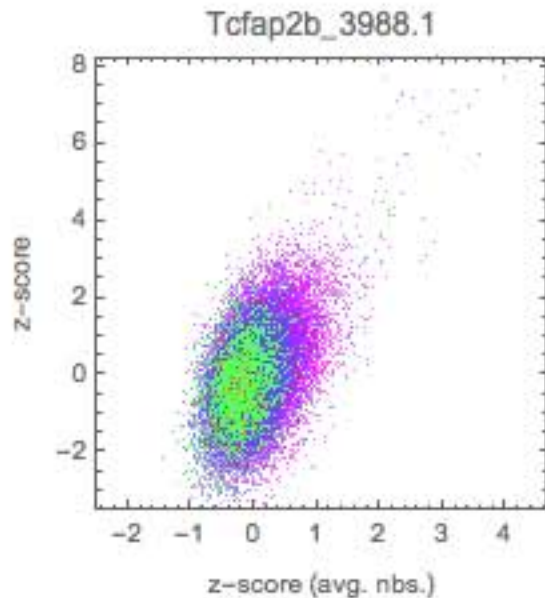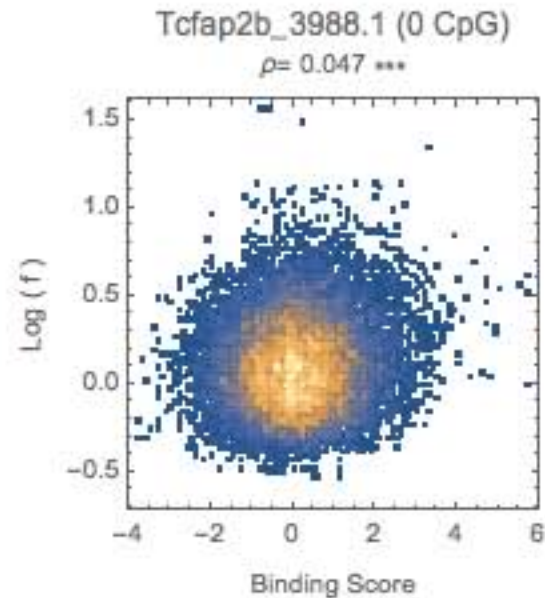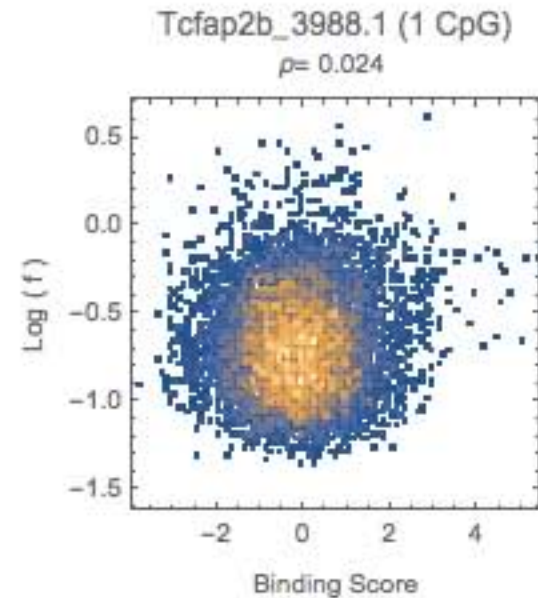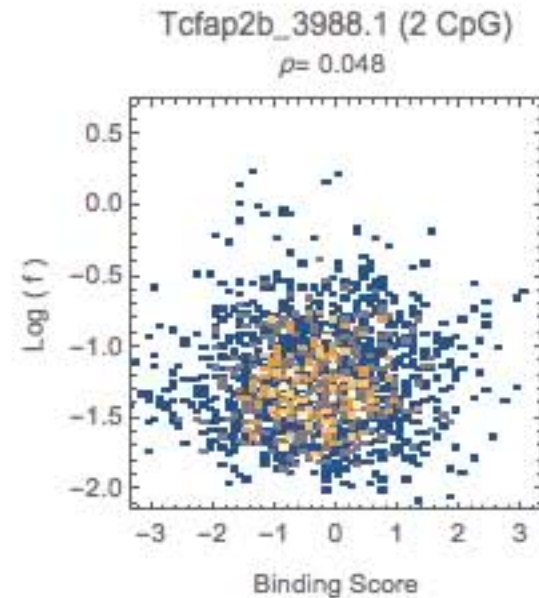



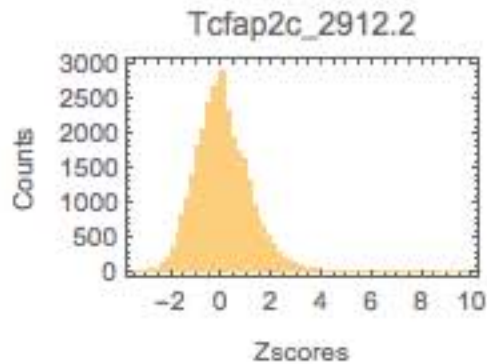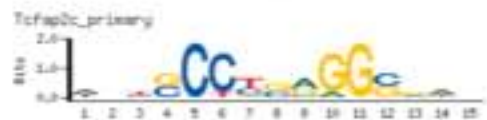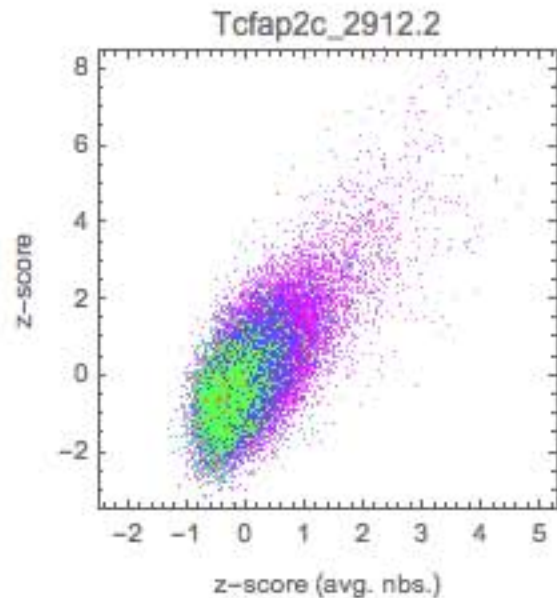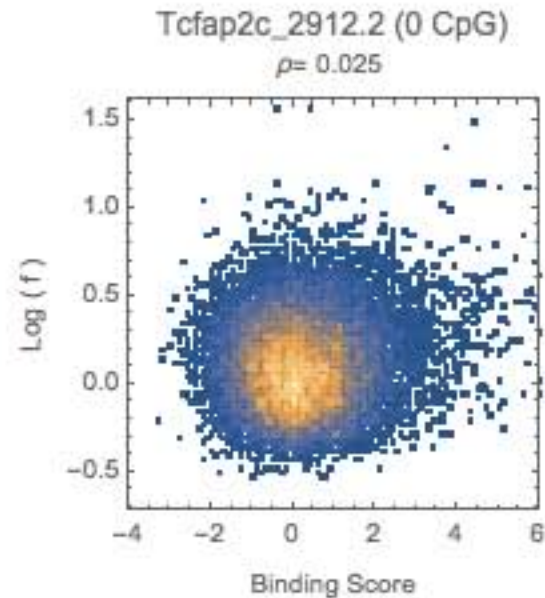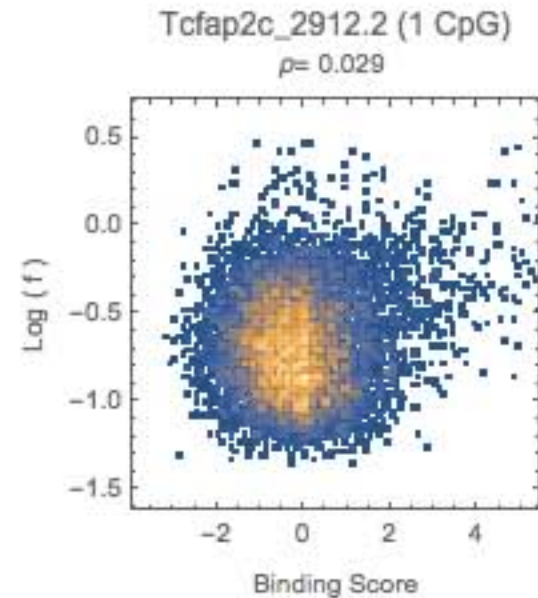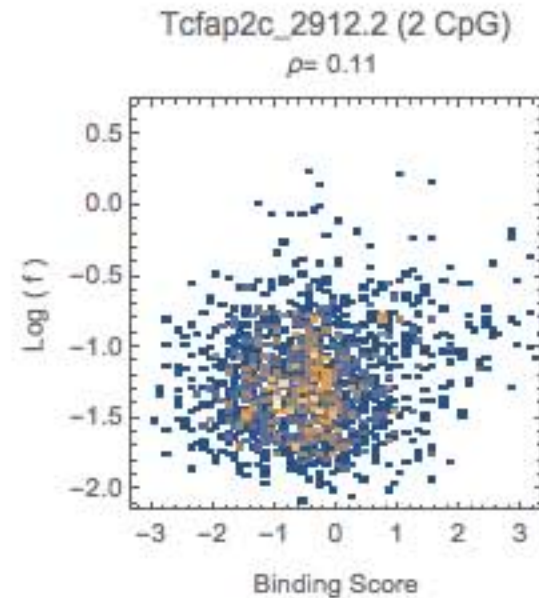



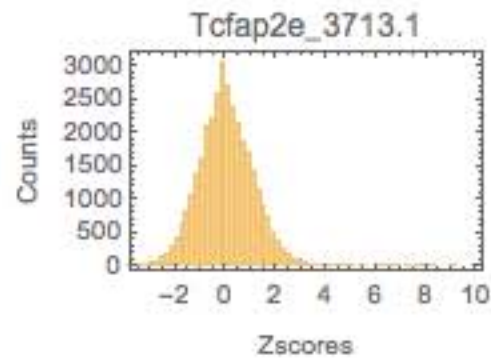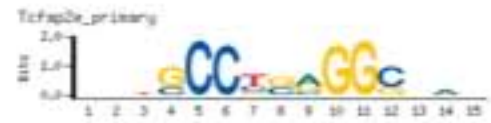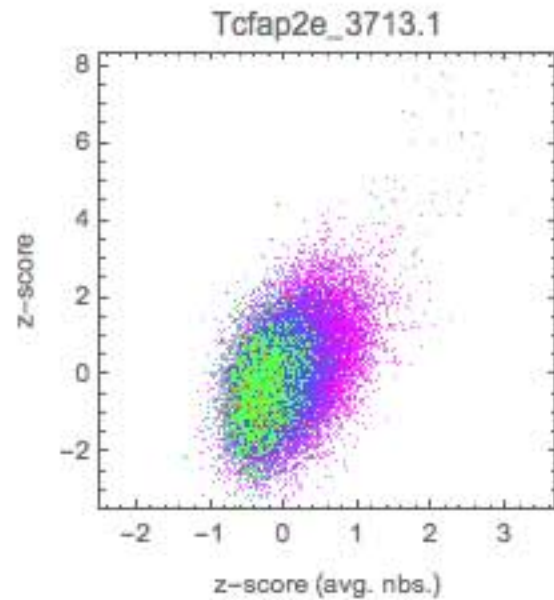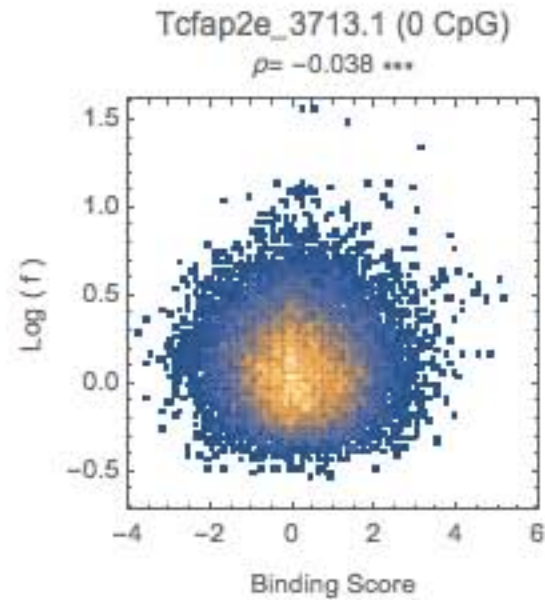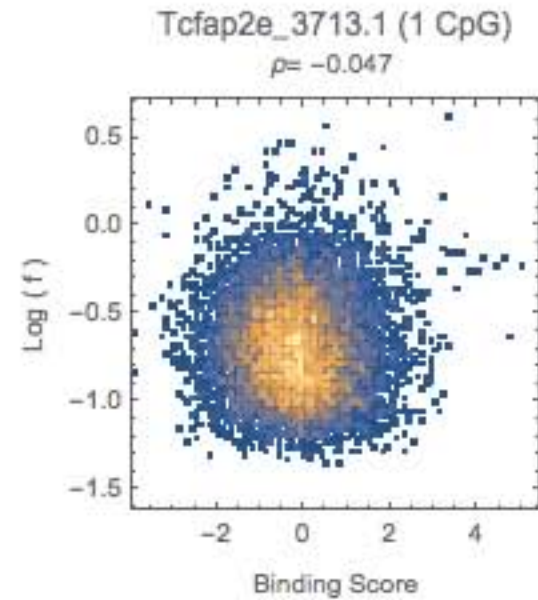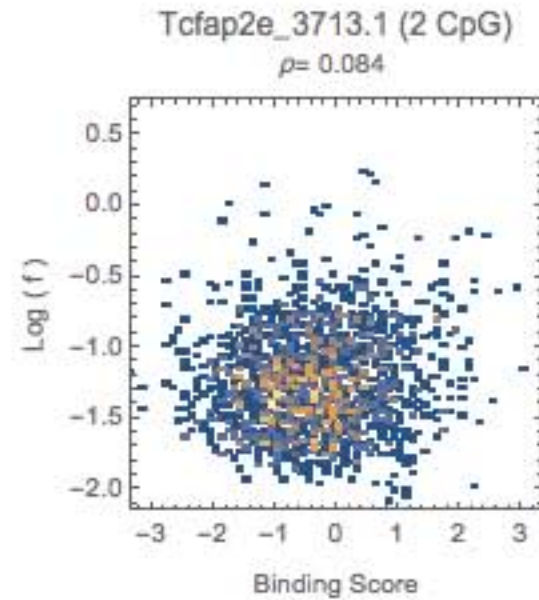

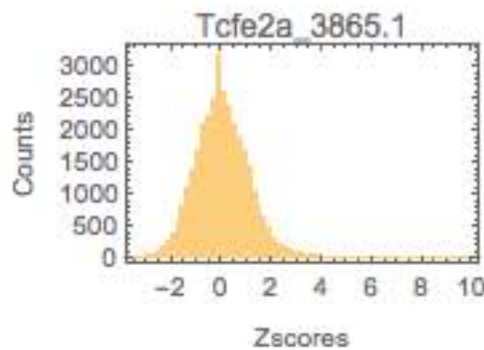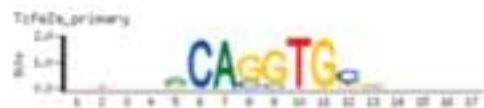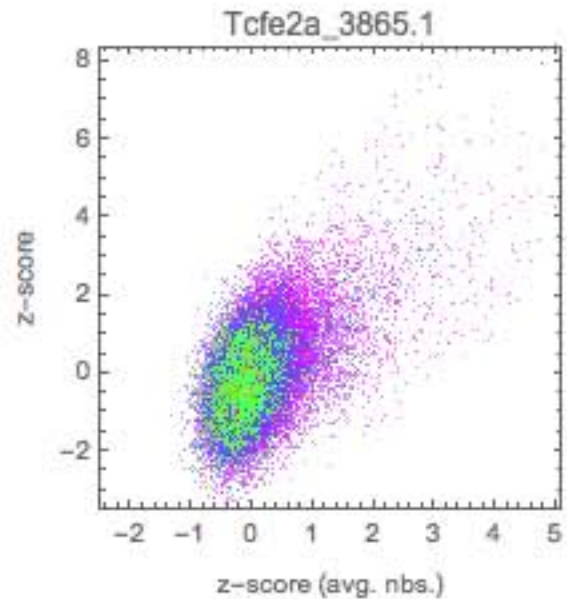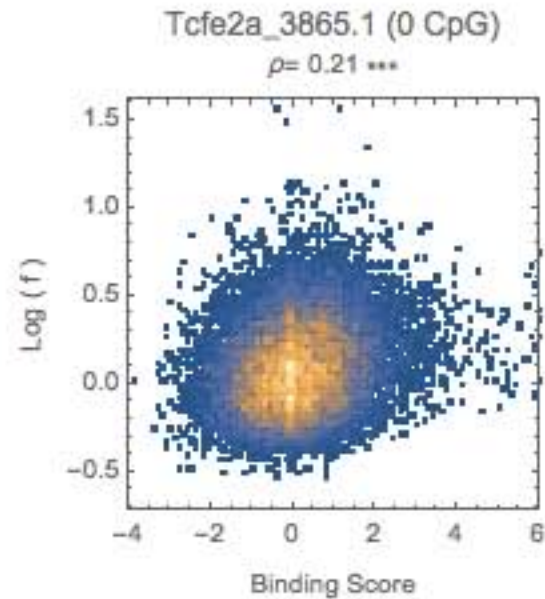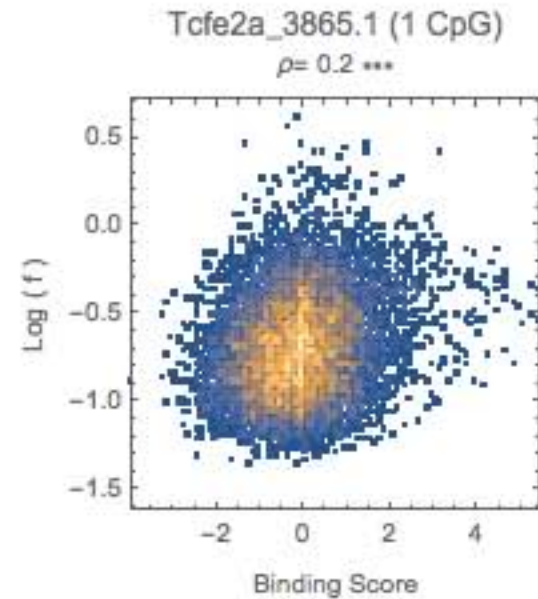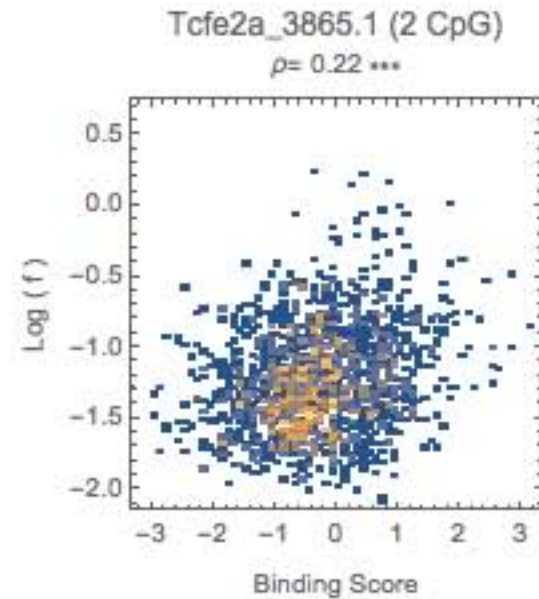

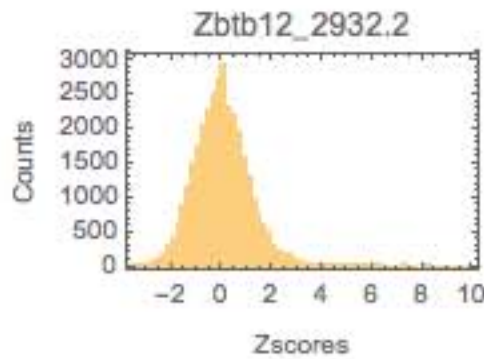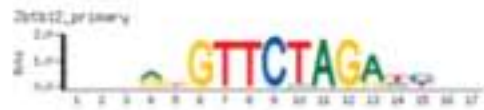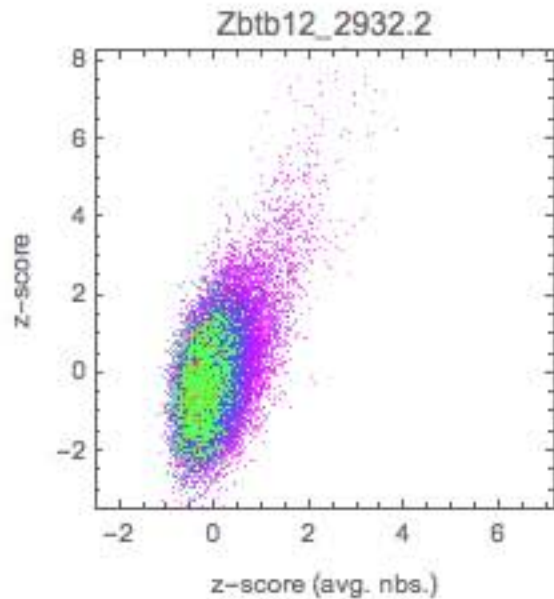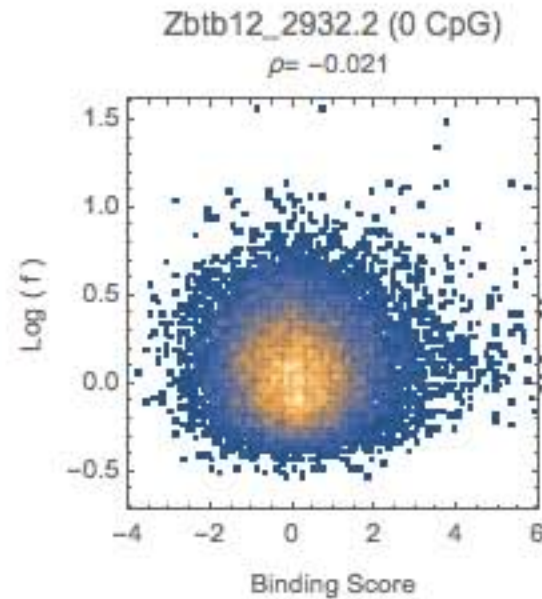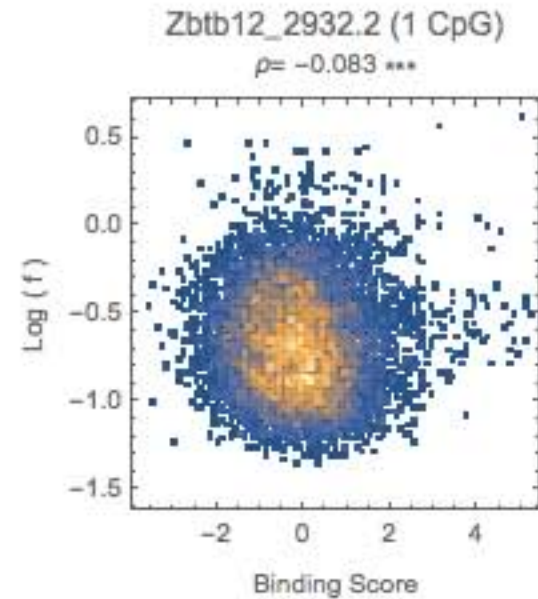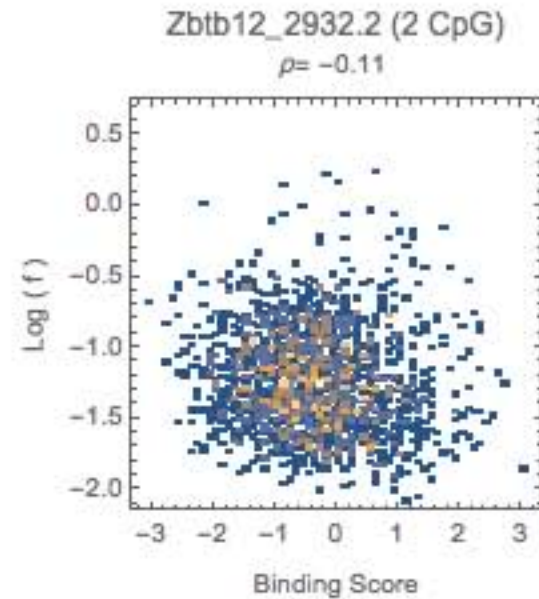



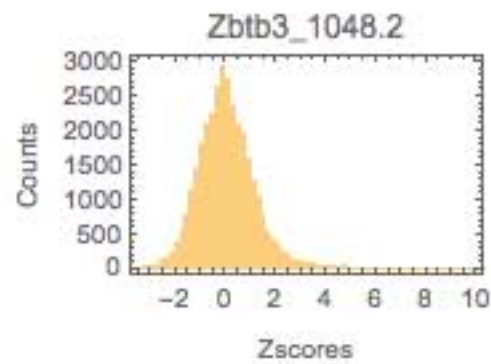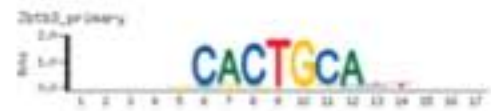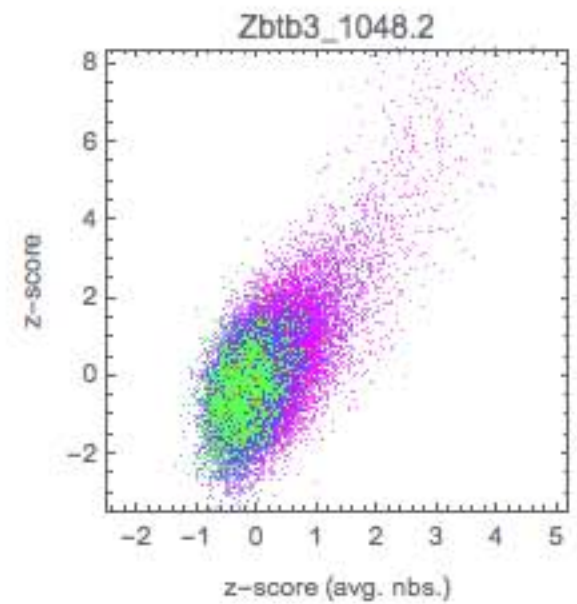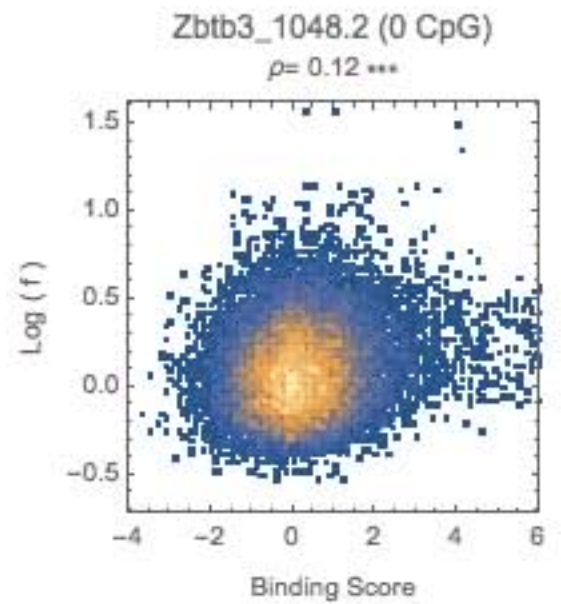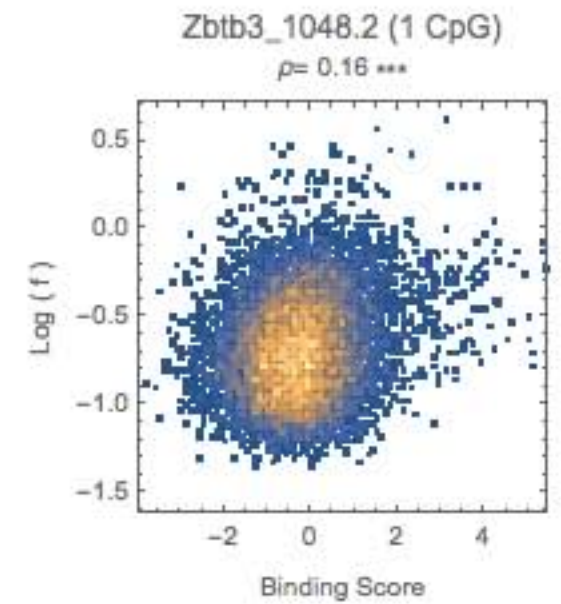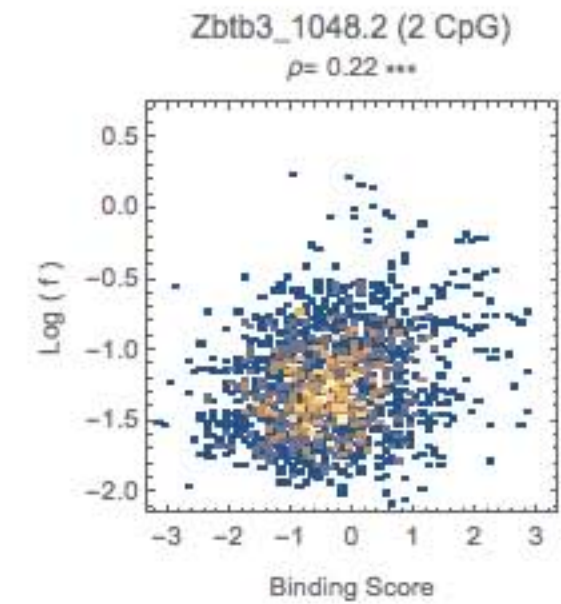



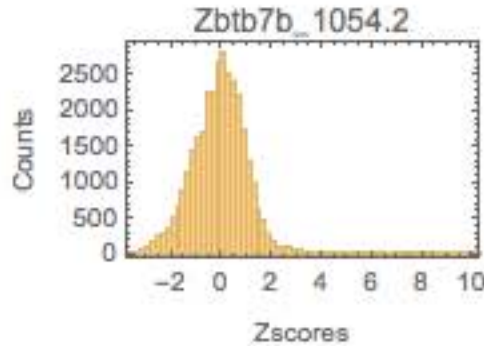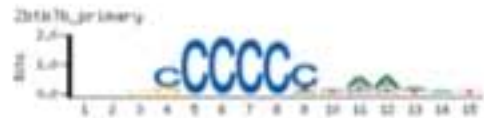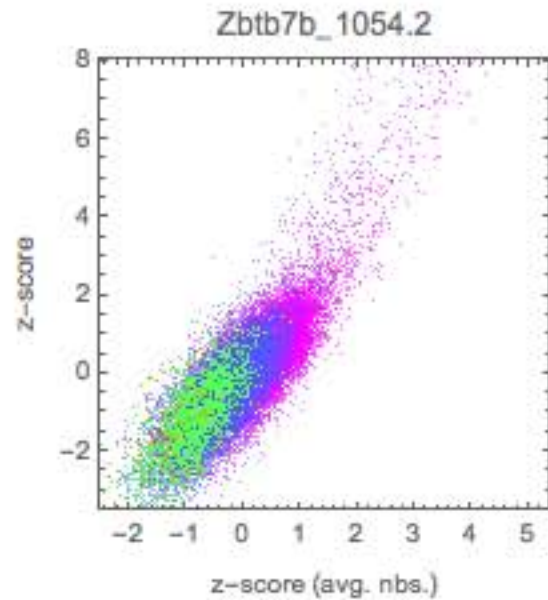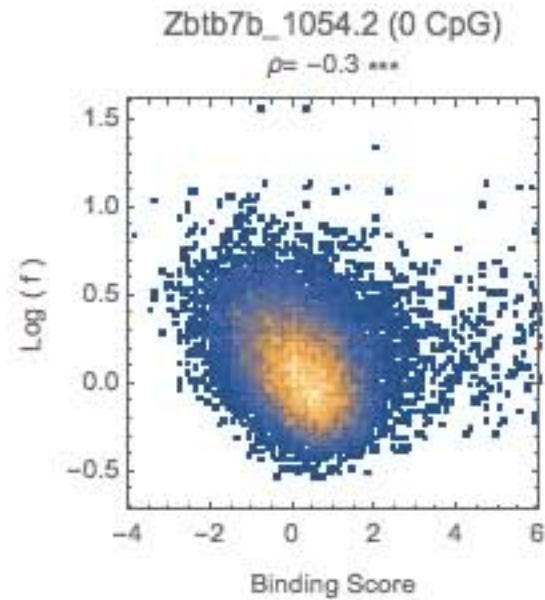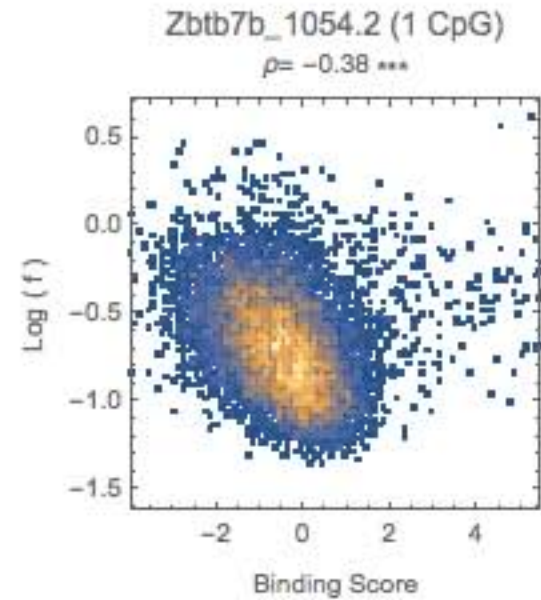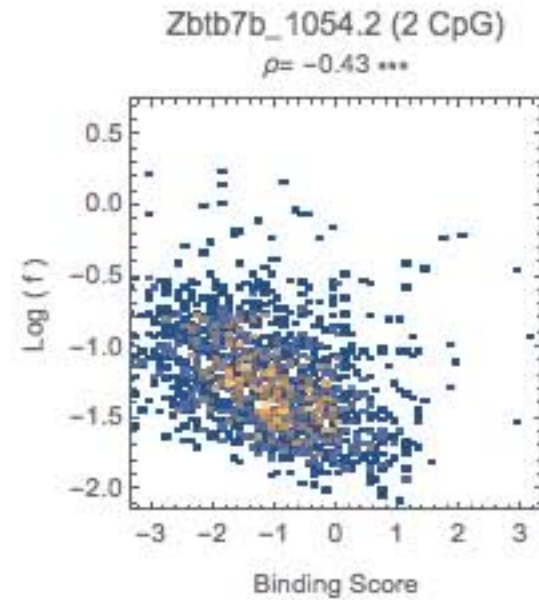

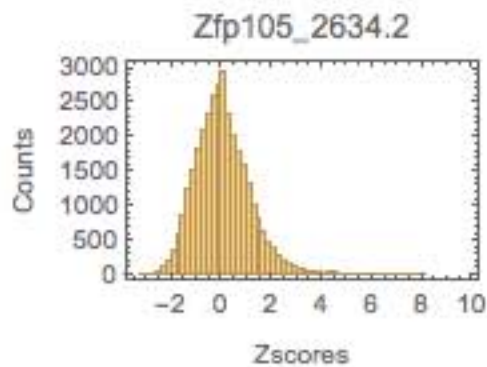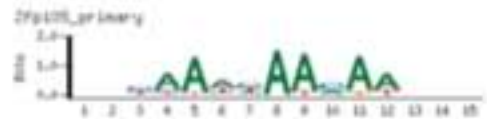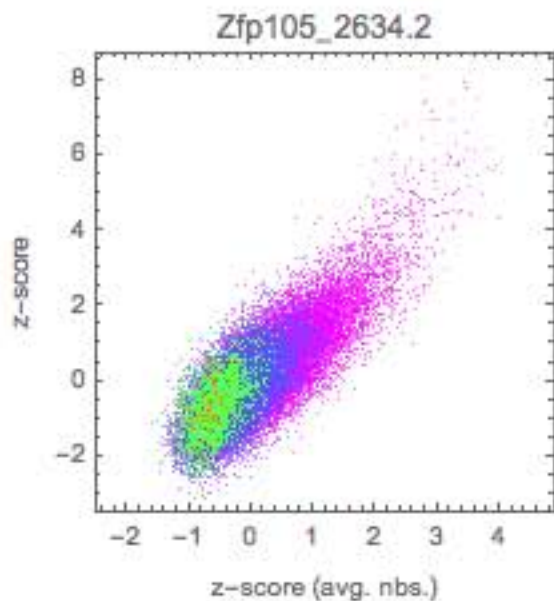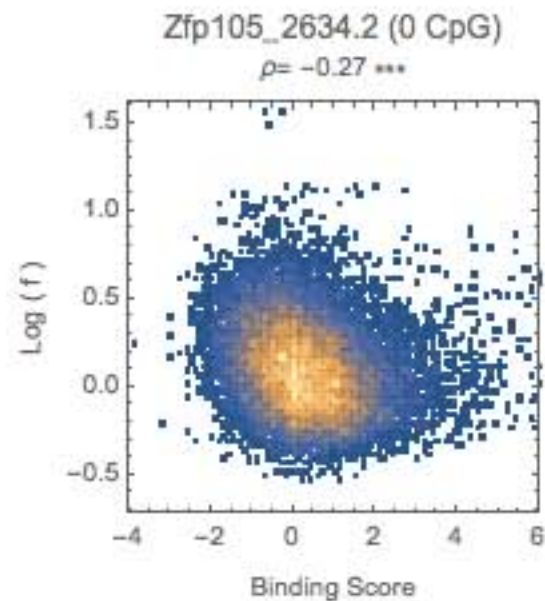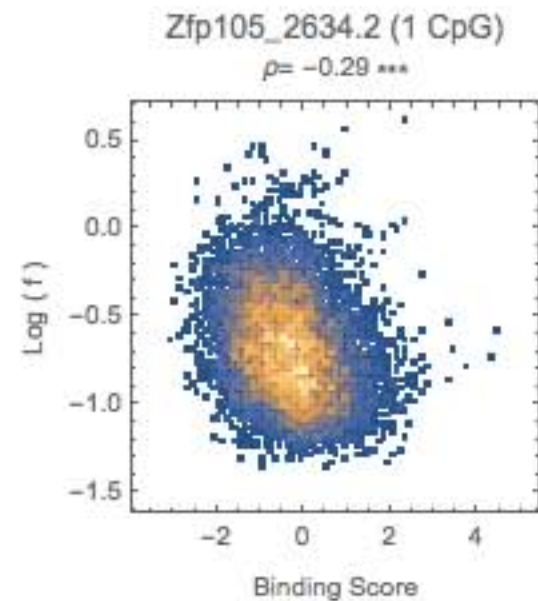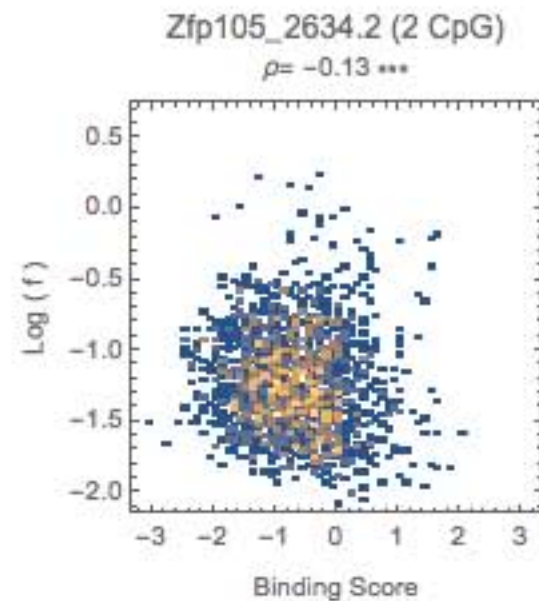

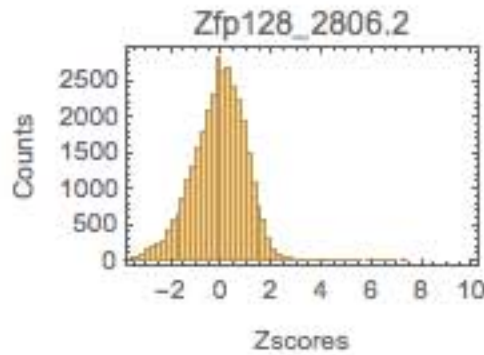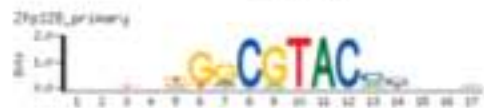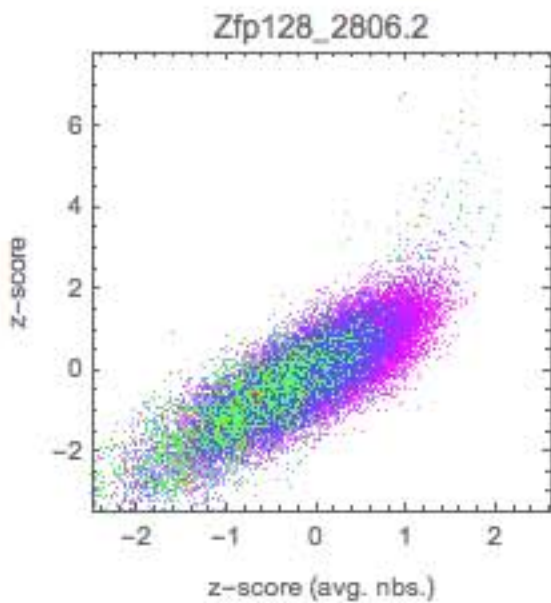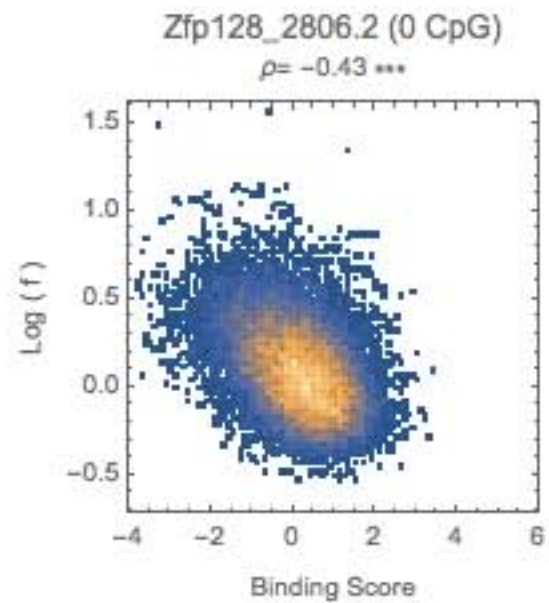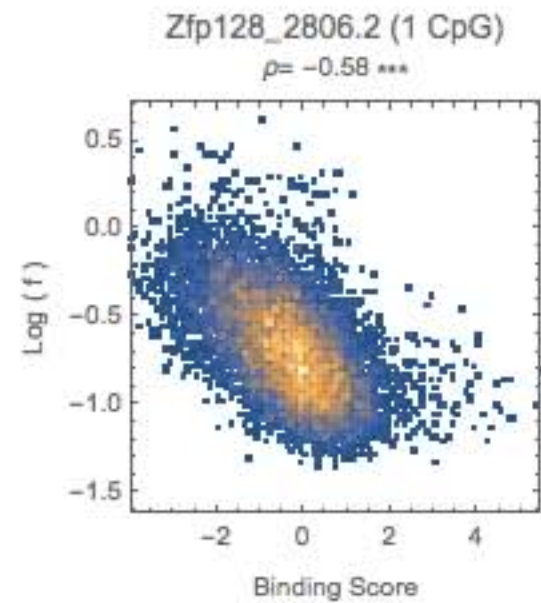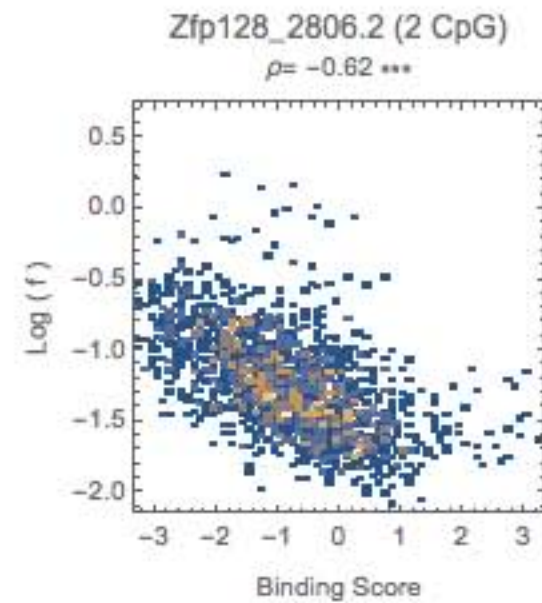



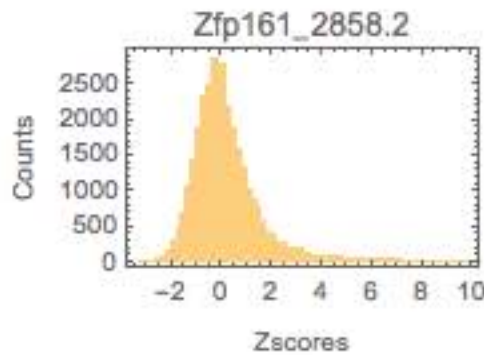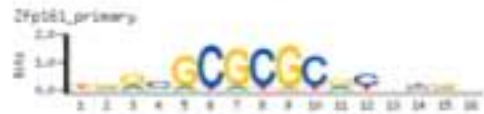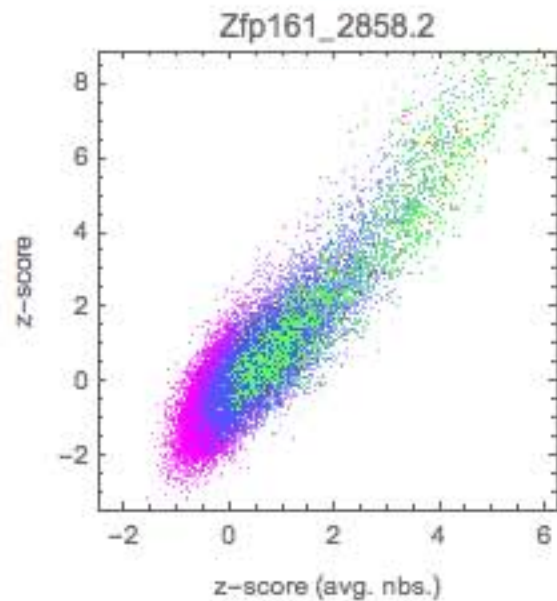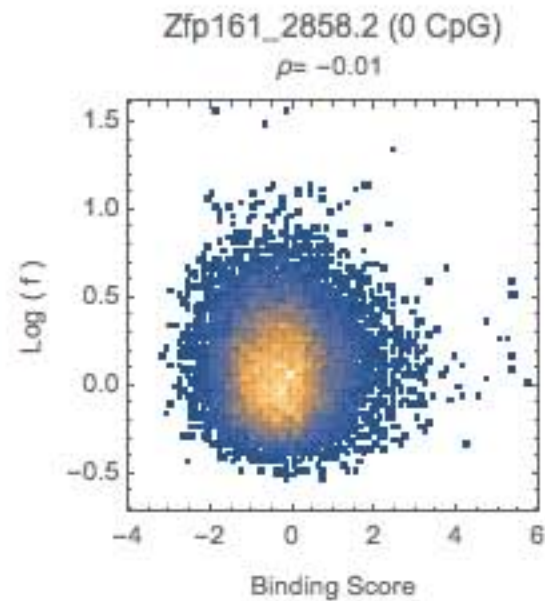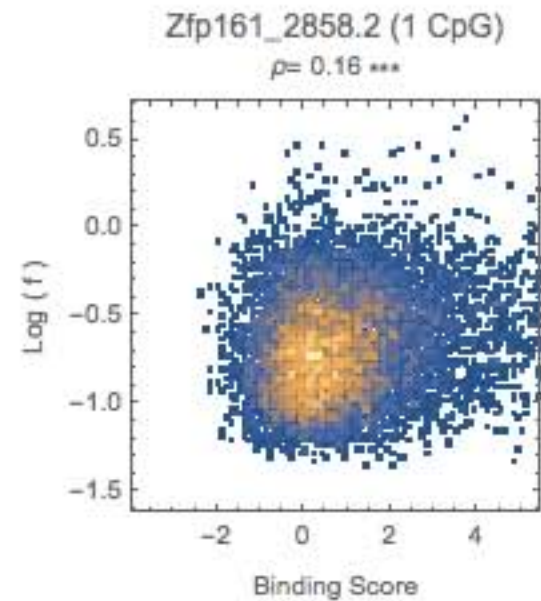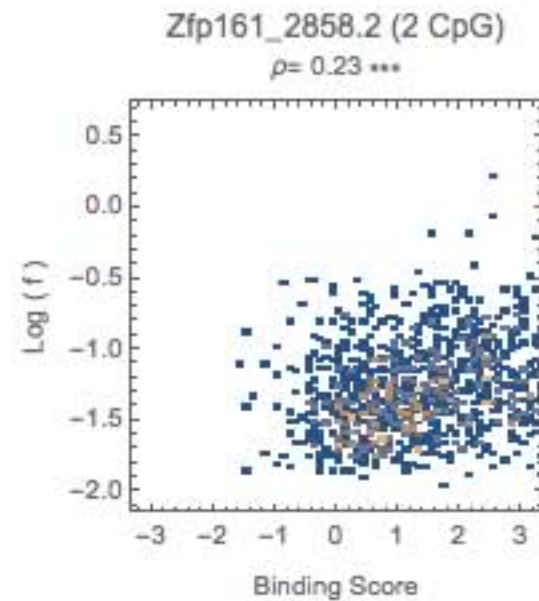



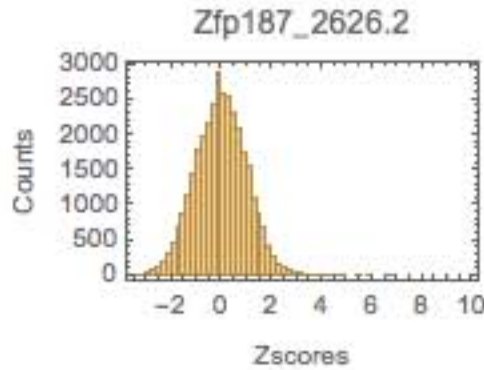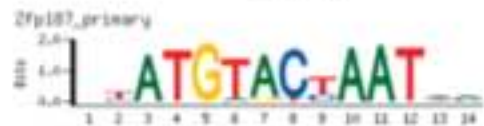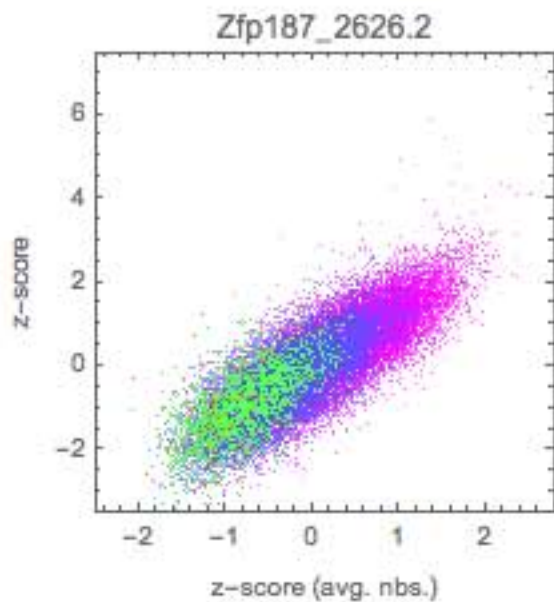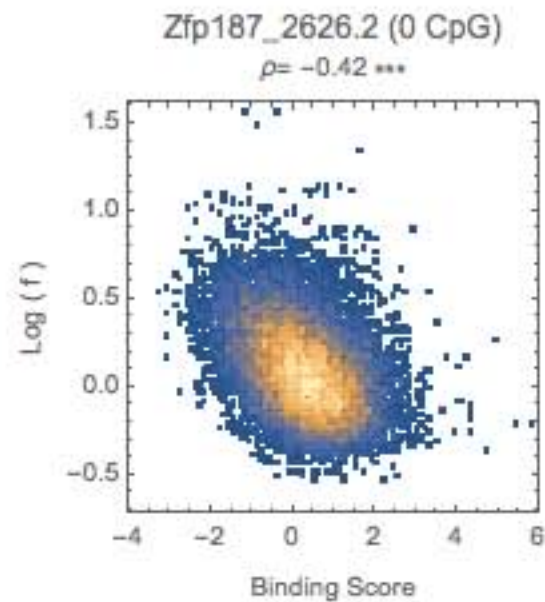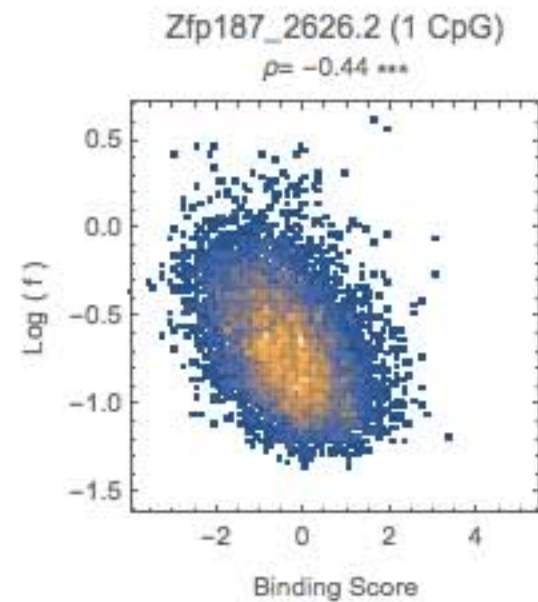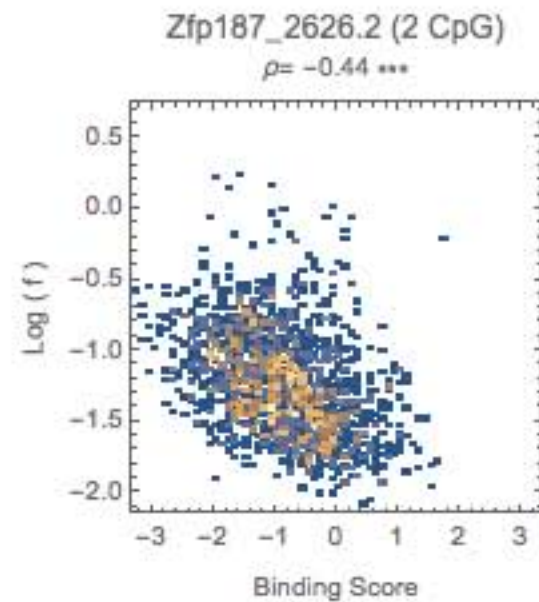

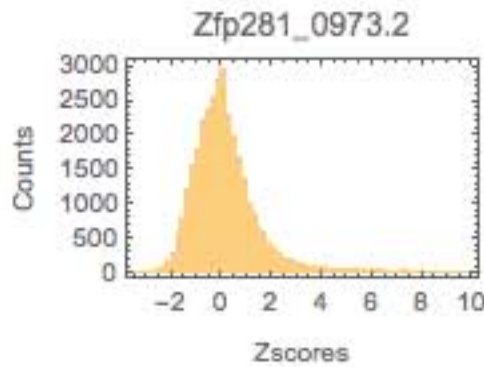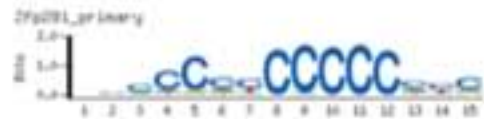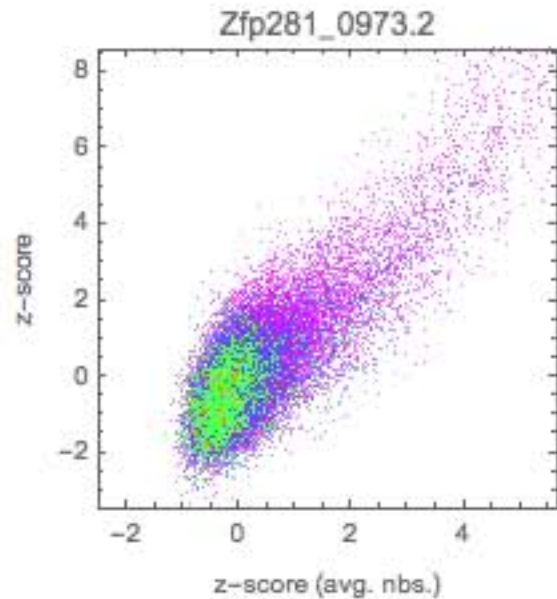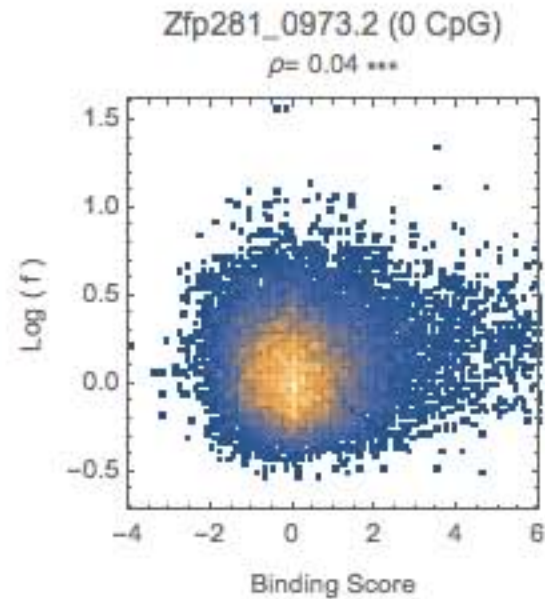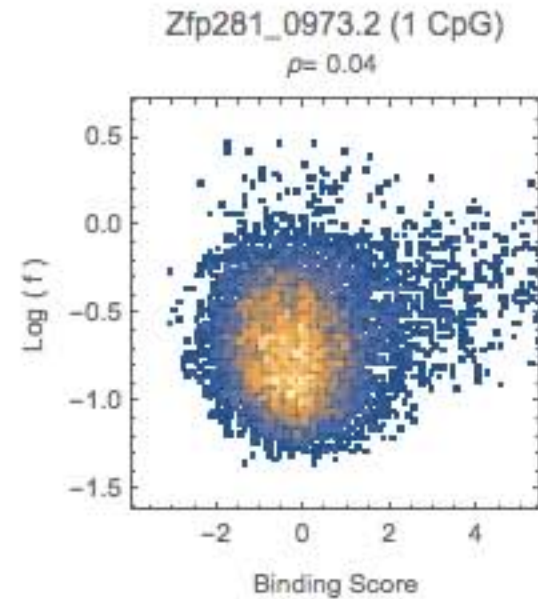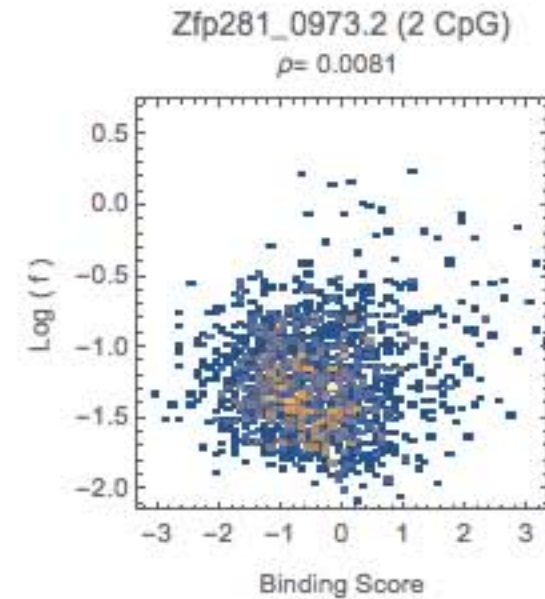

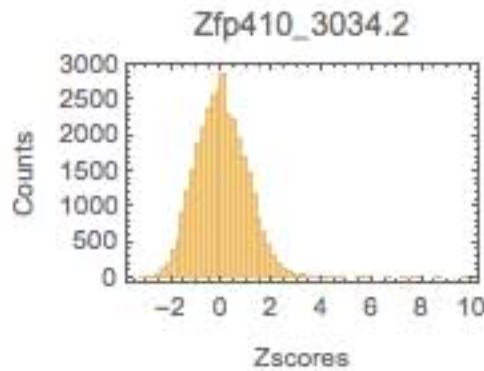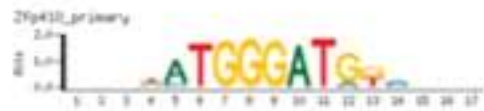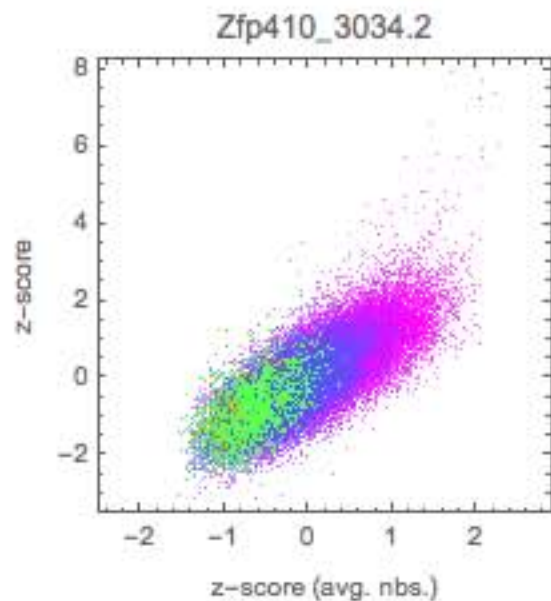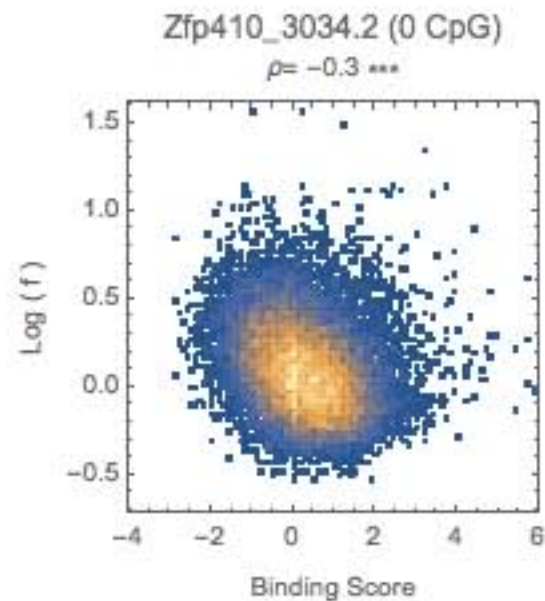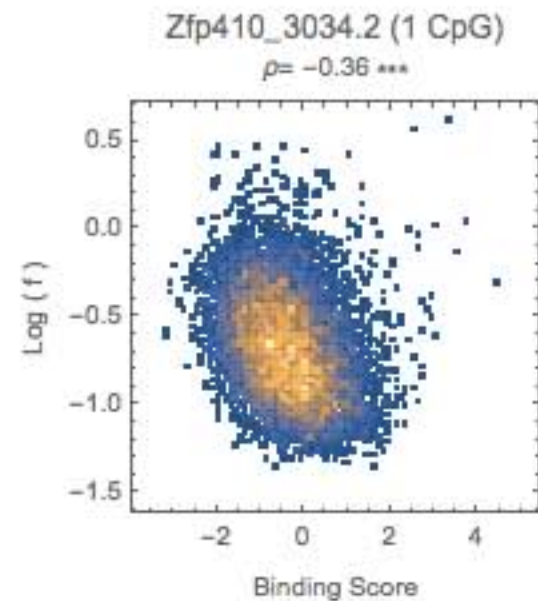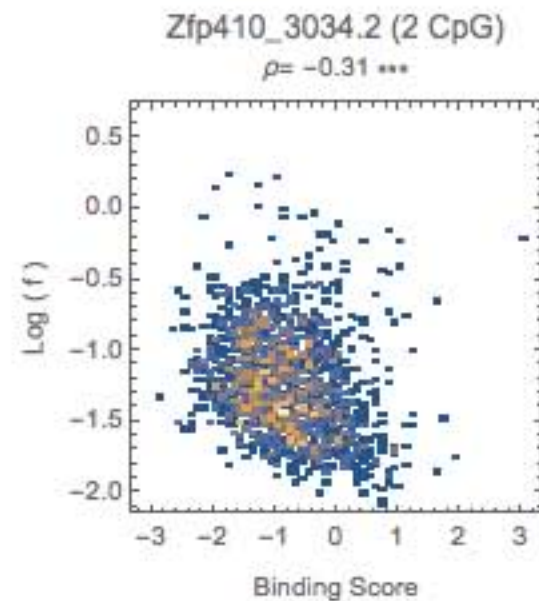



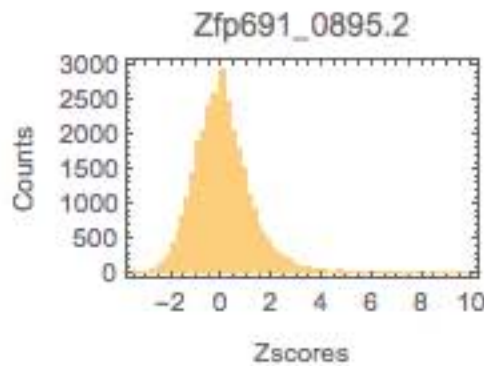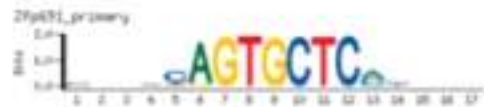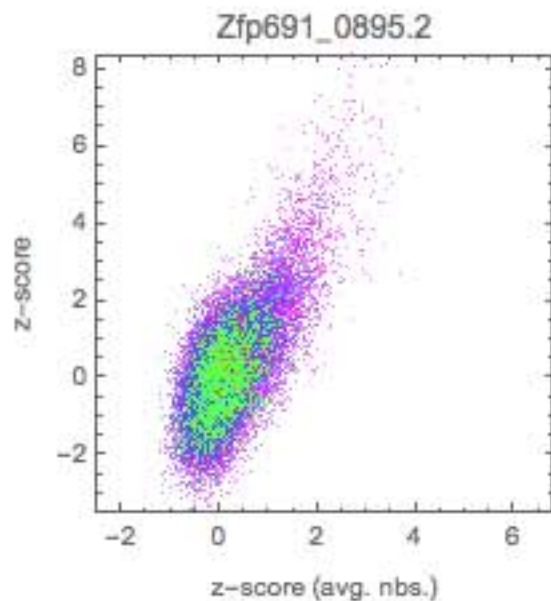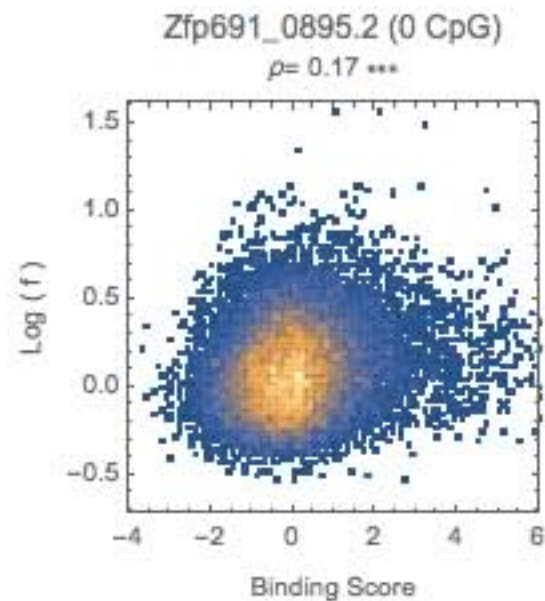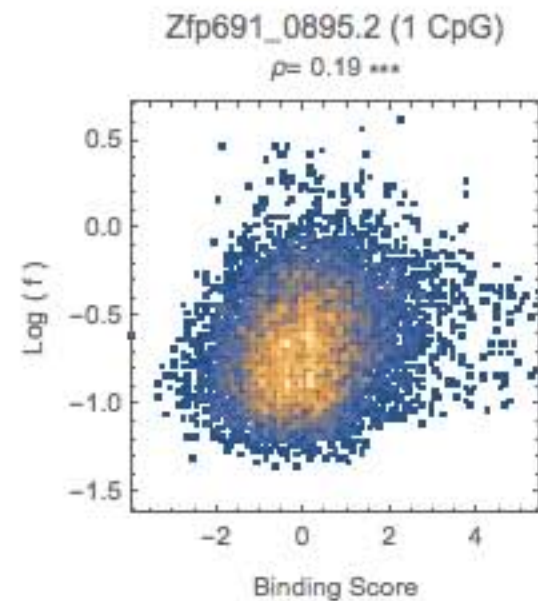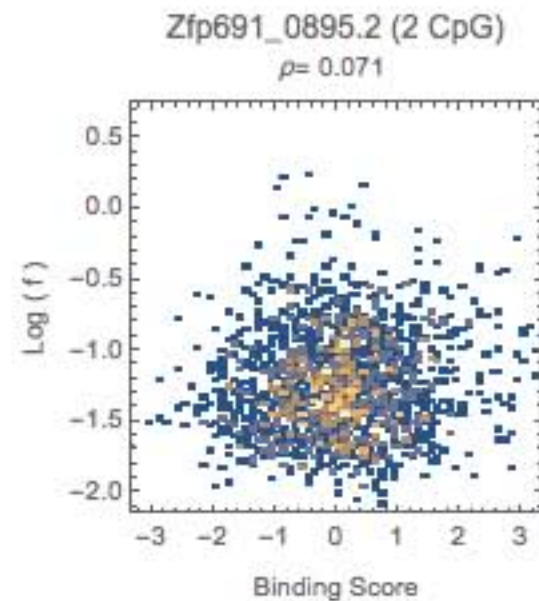



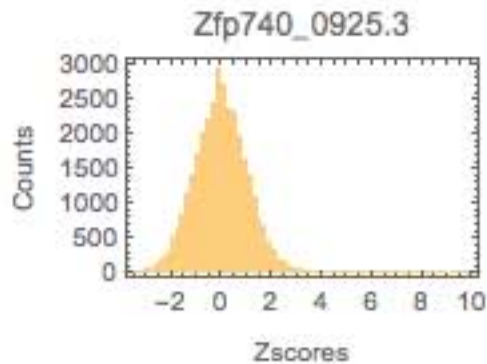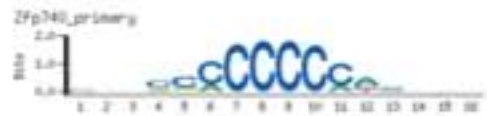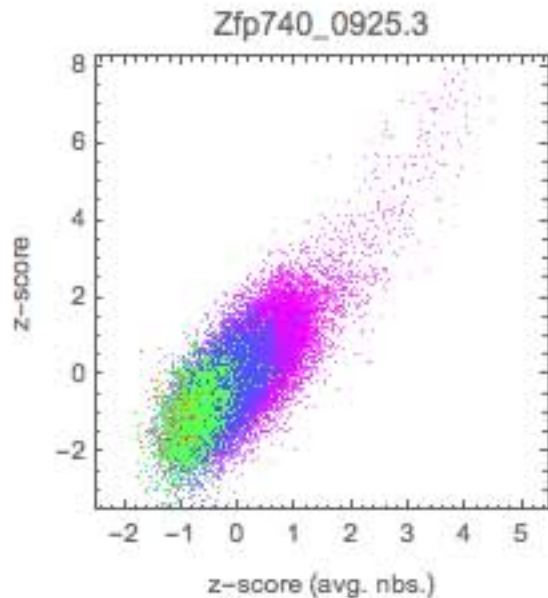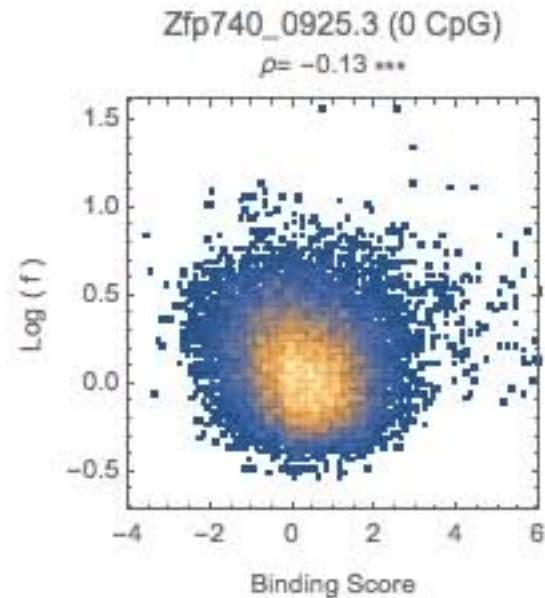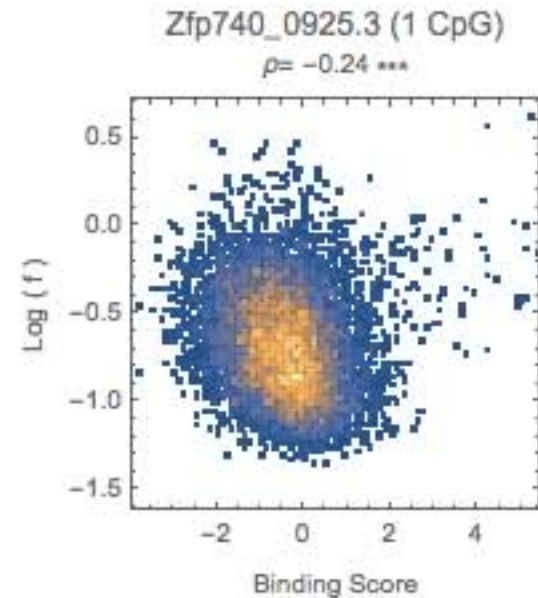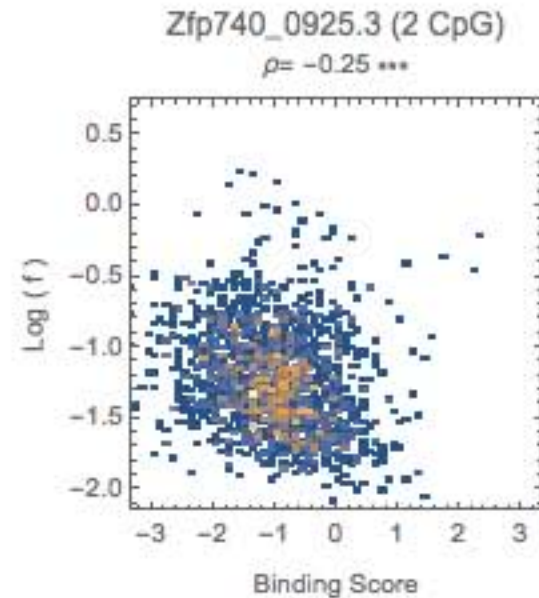

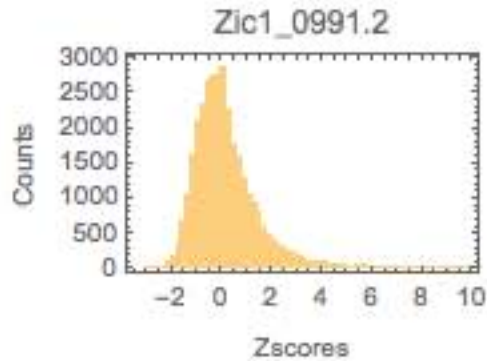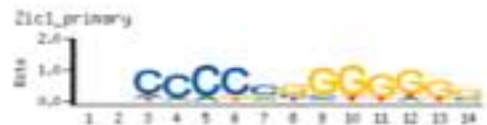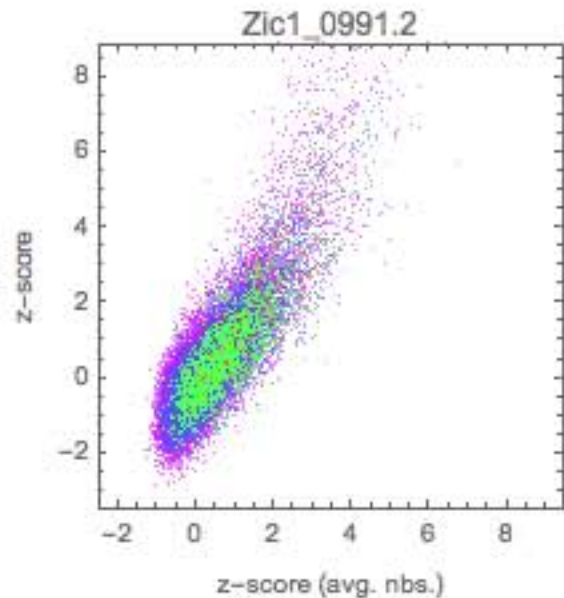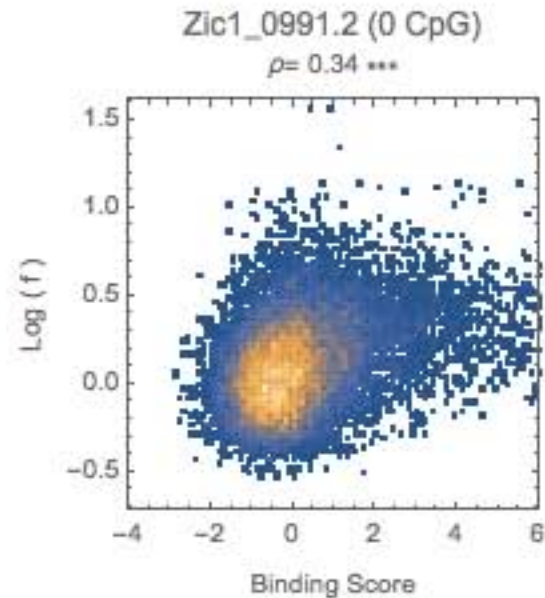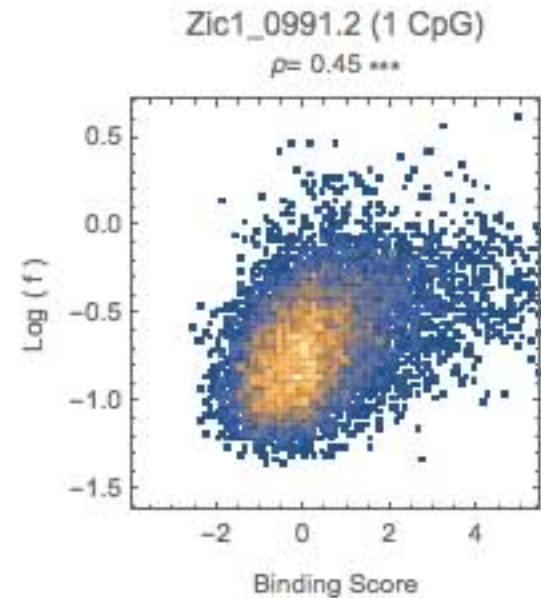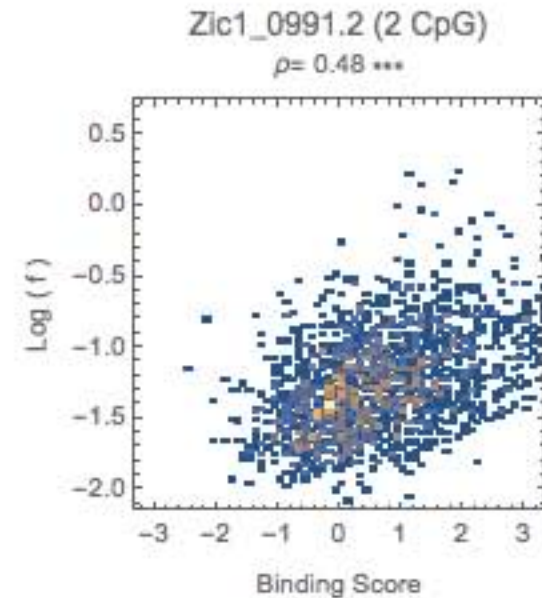

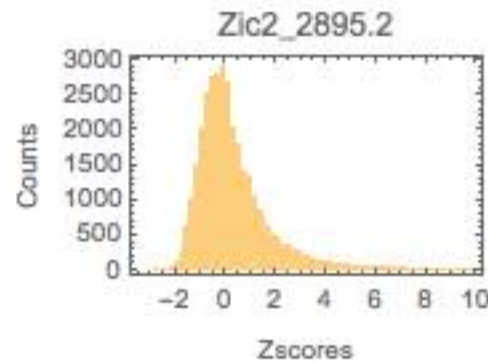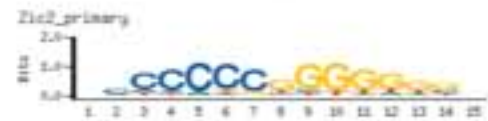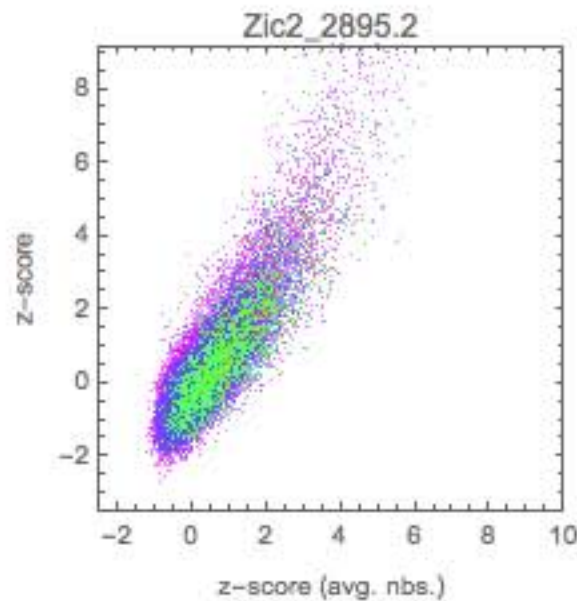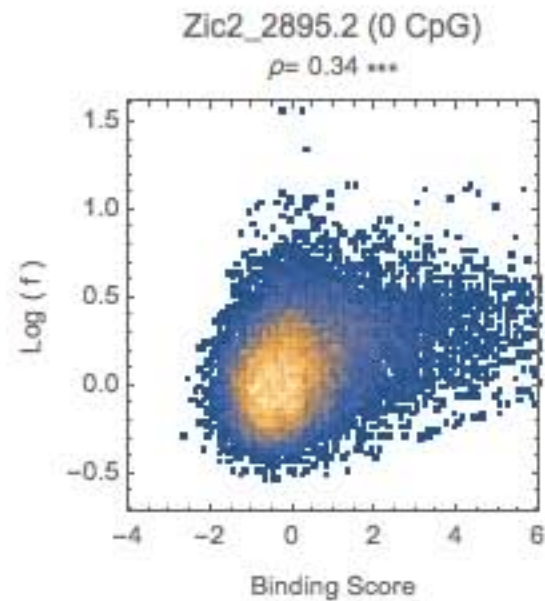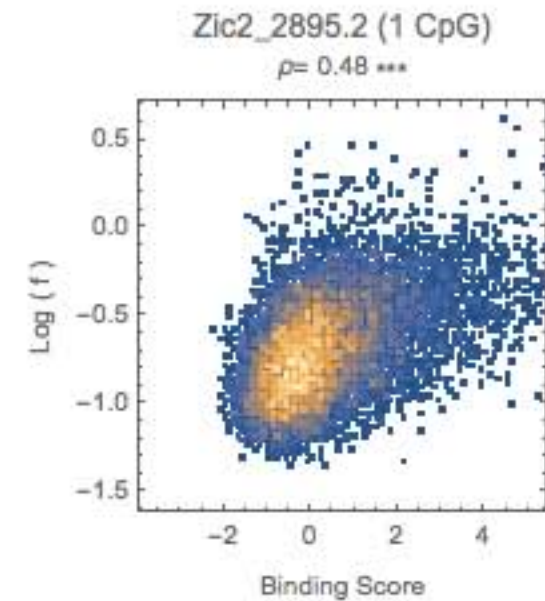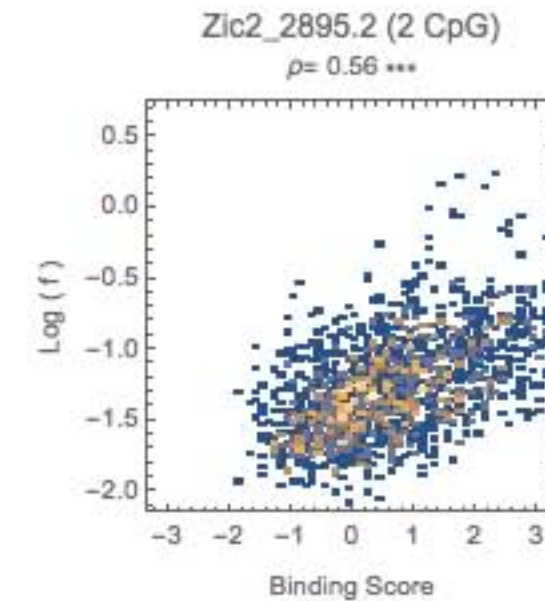

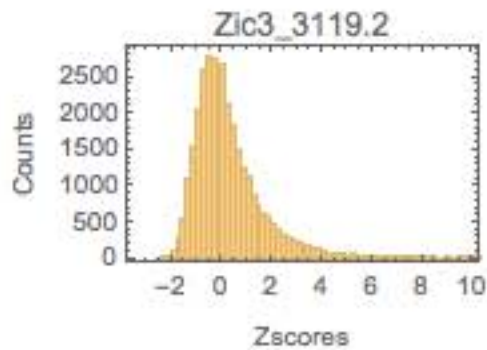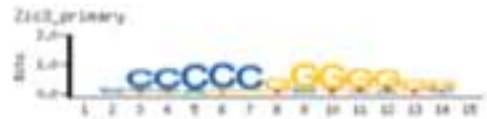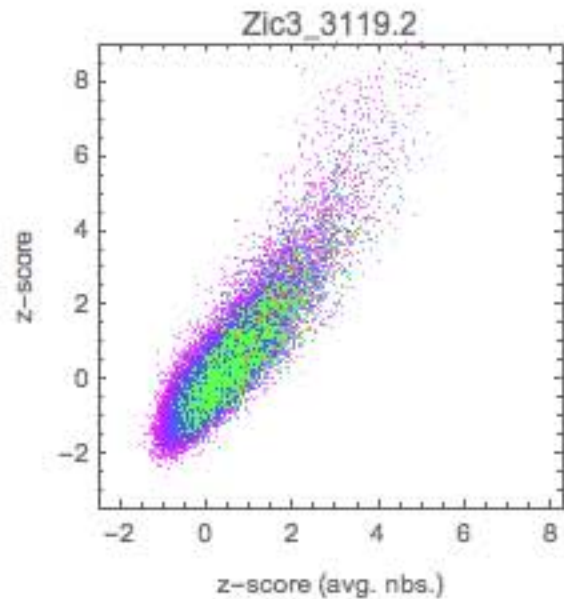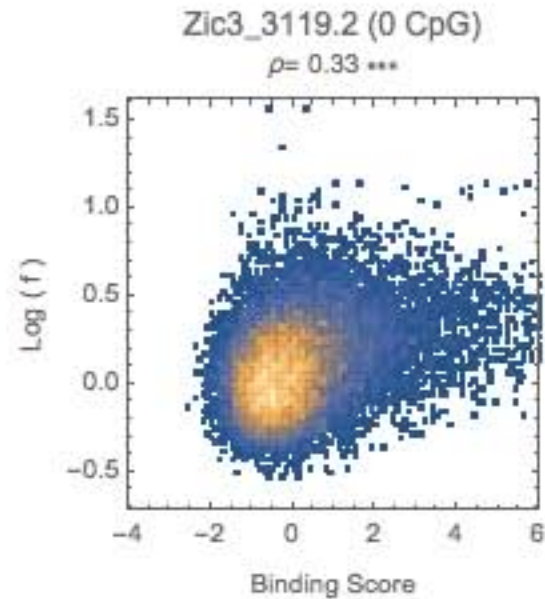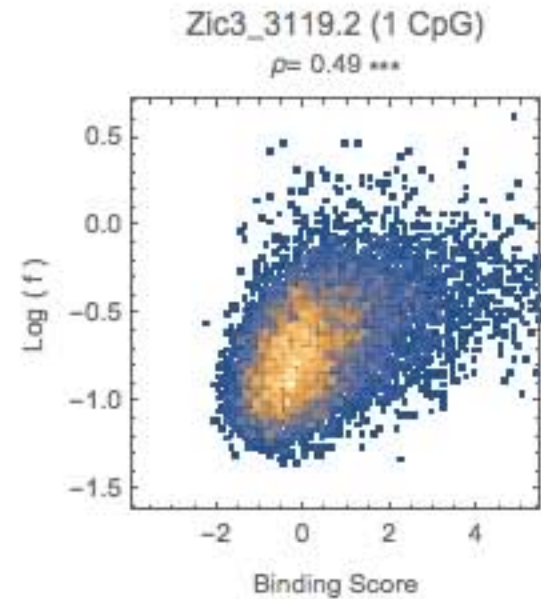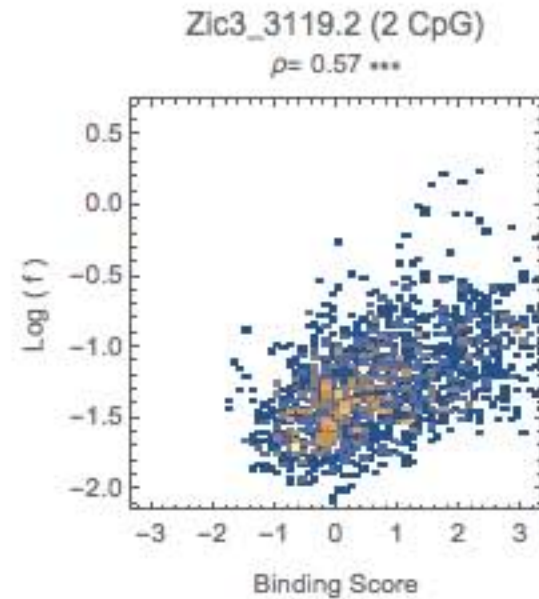



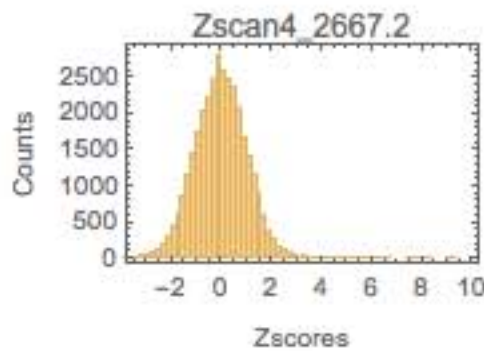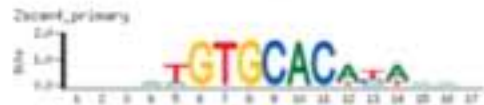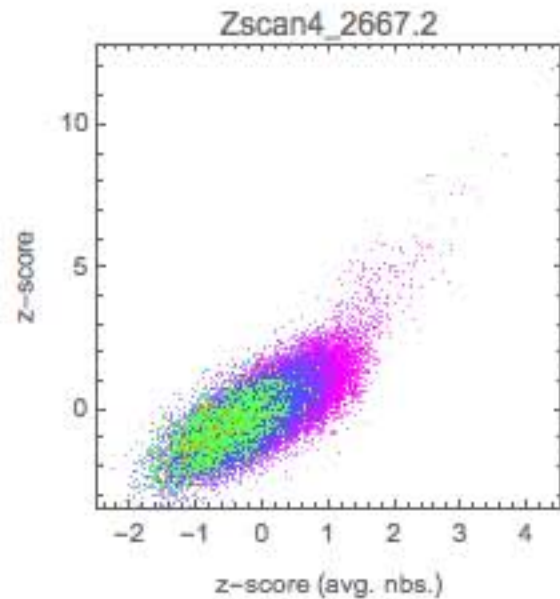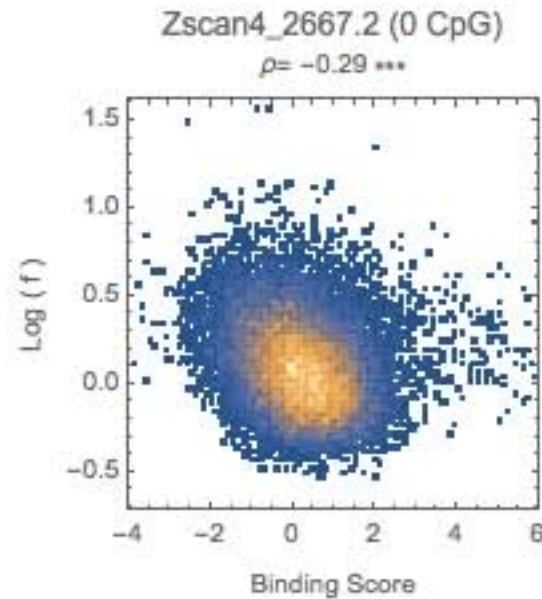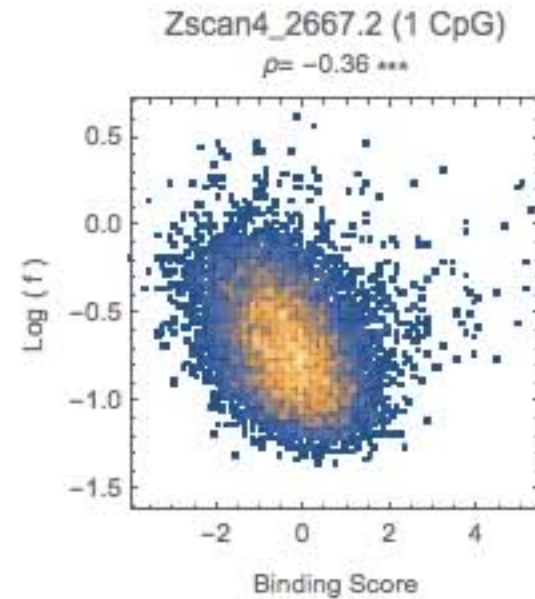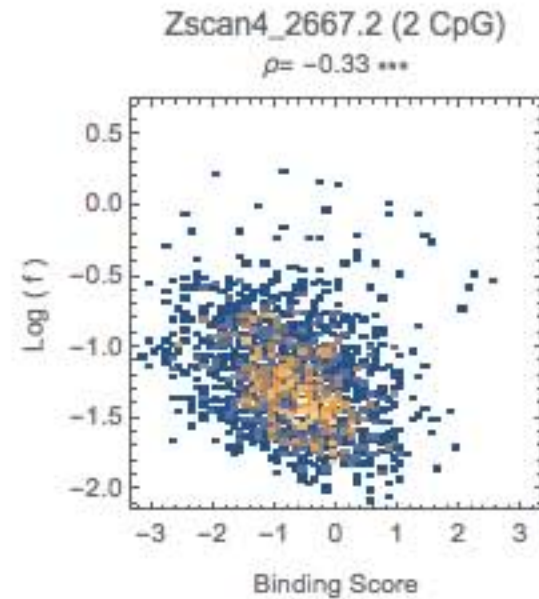

*C. elegans*

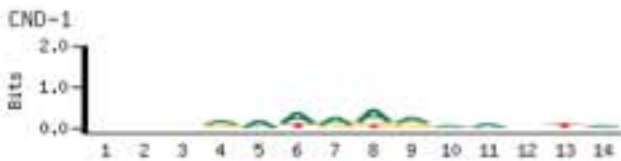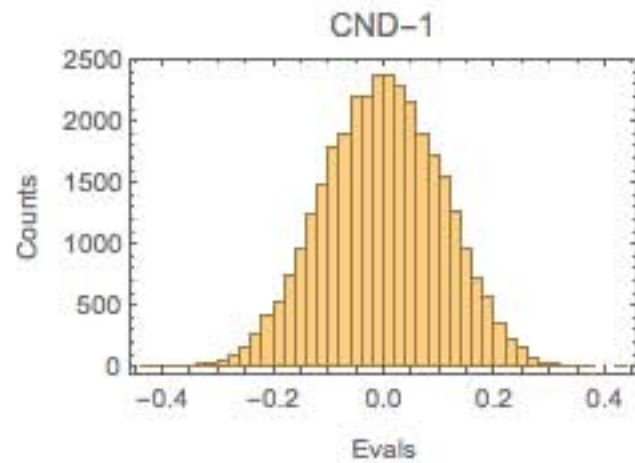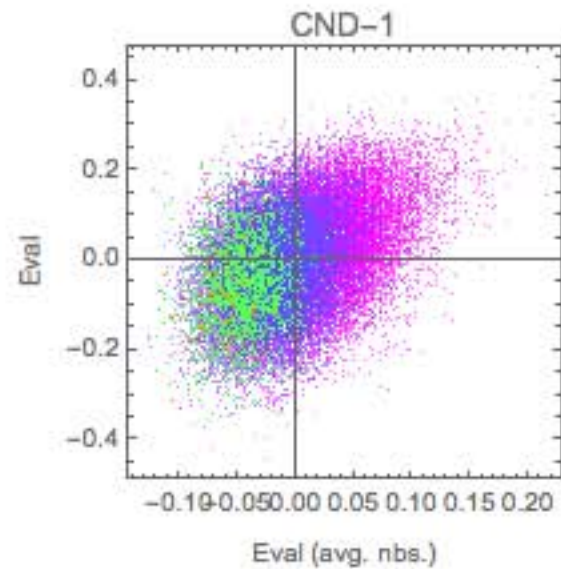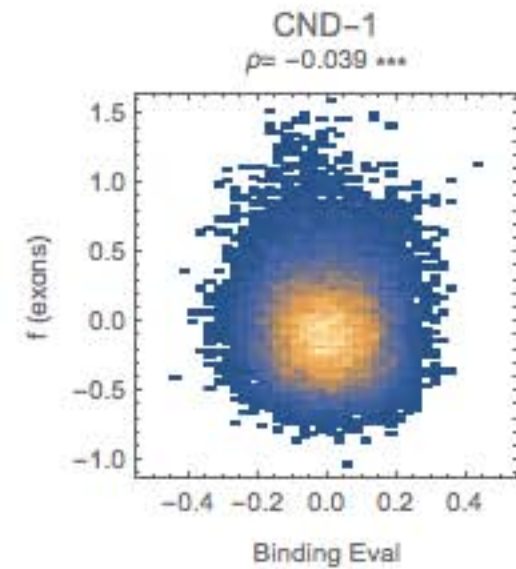

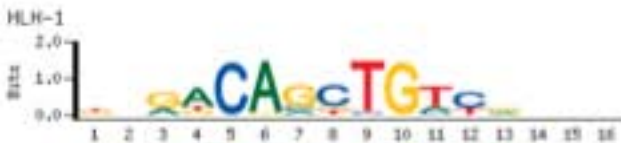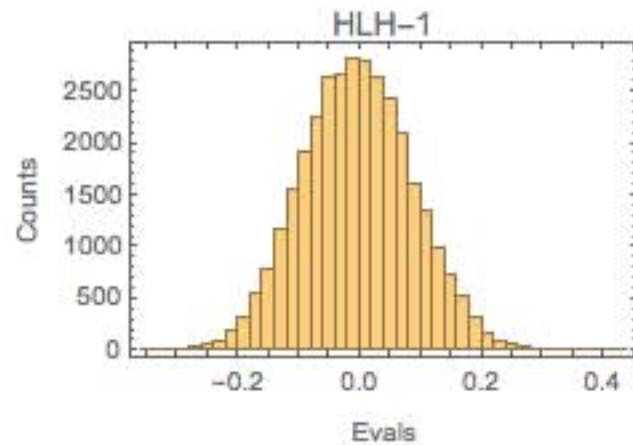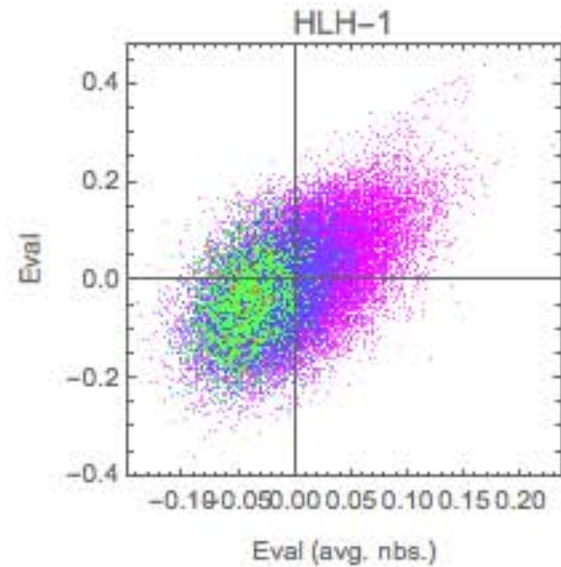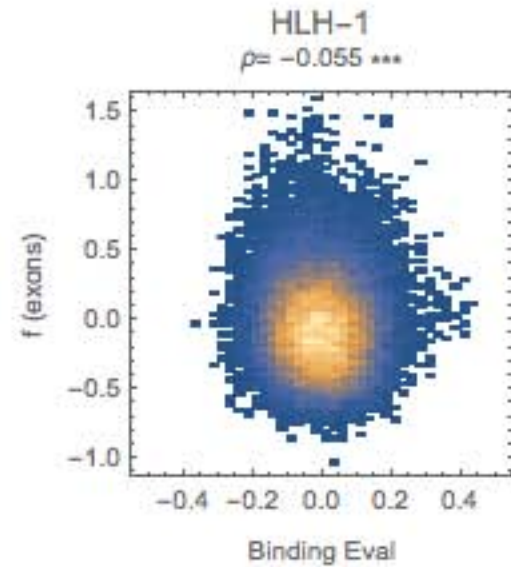



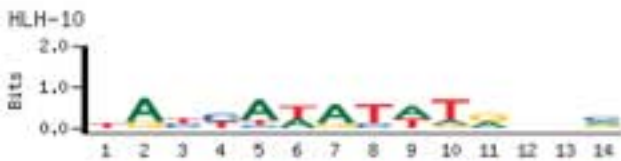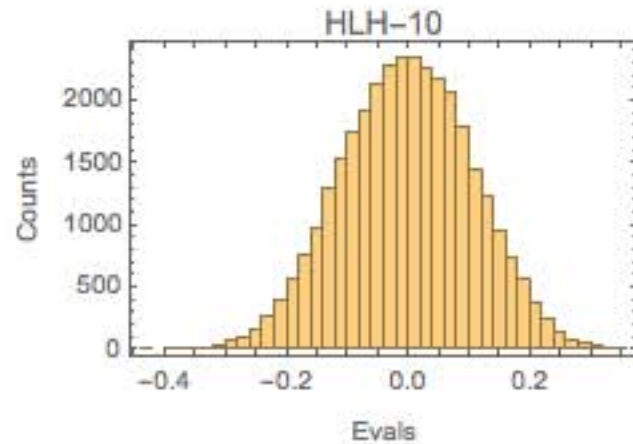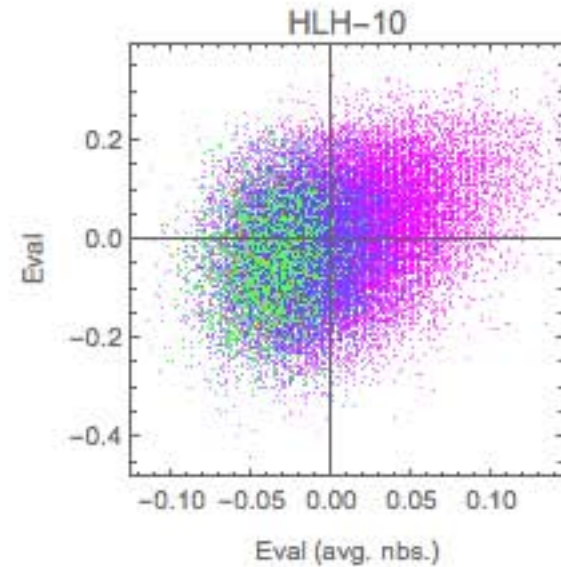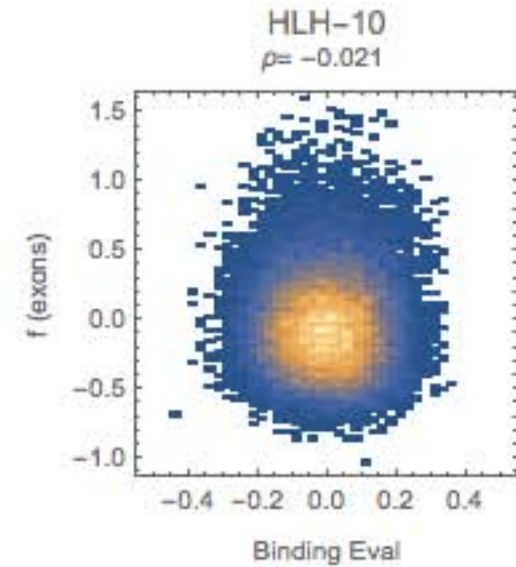

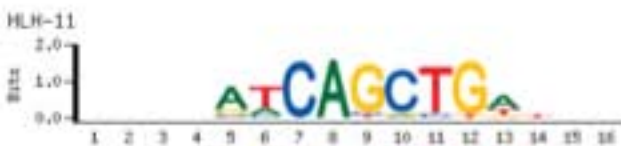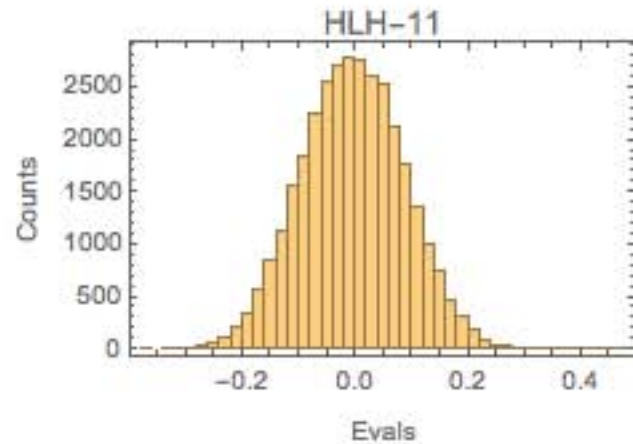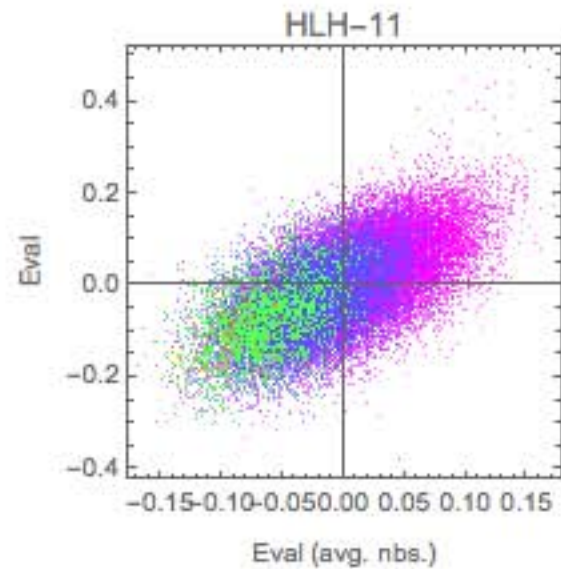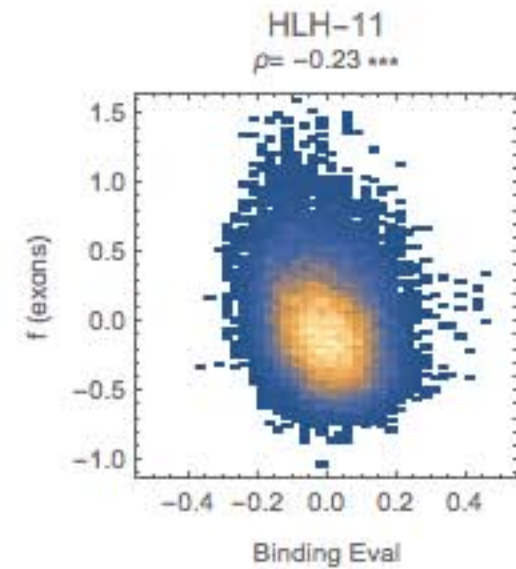

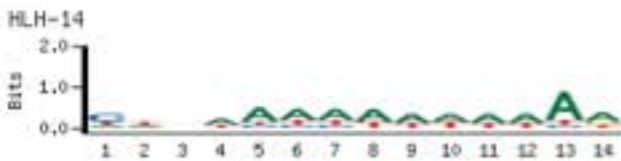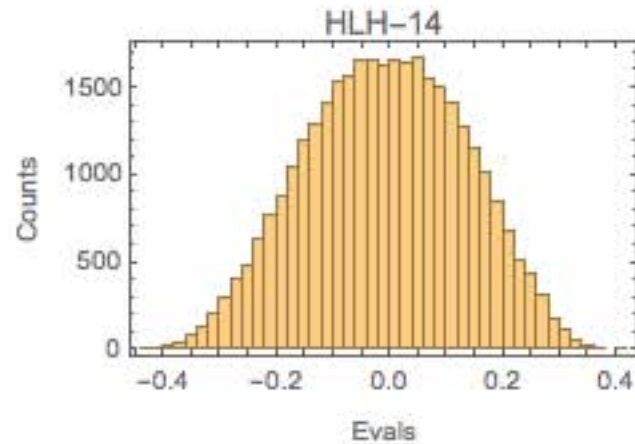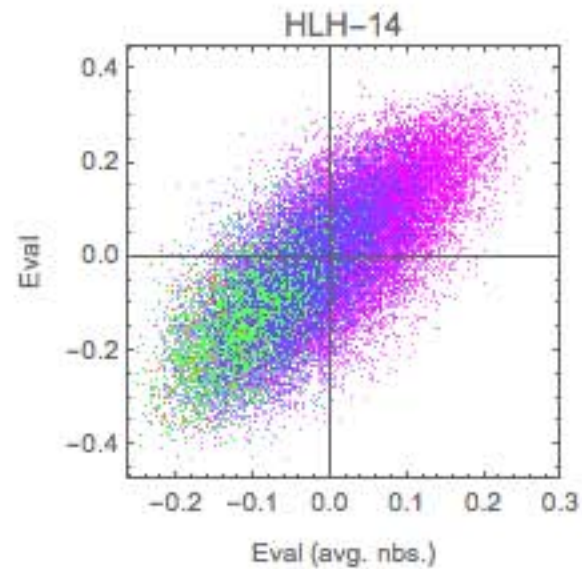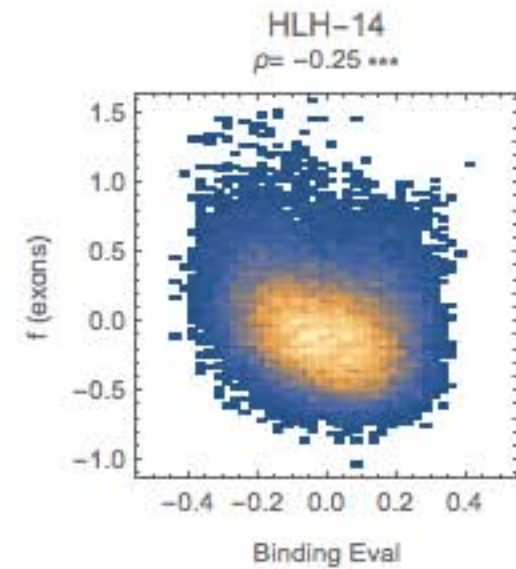

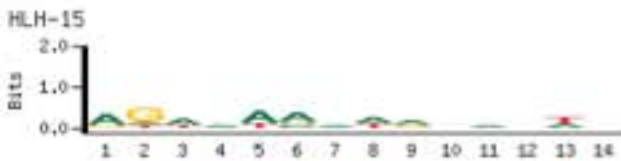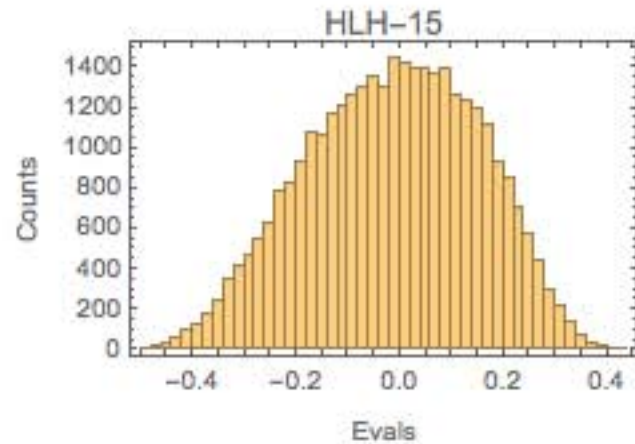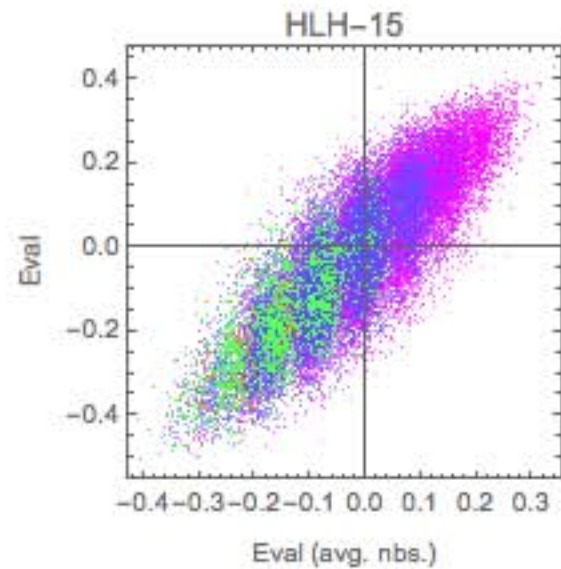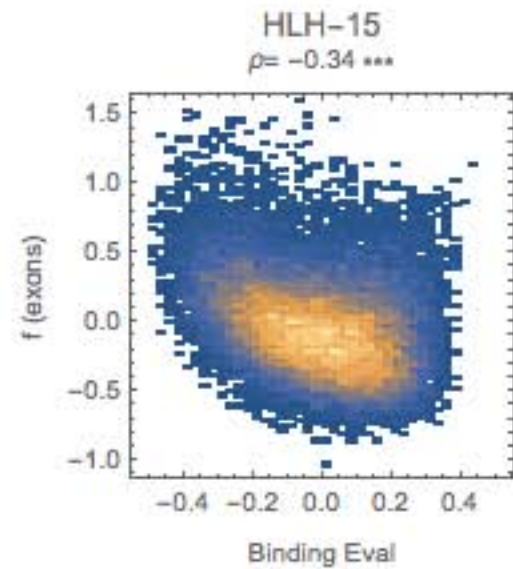



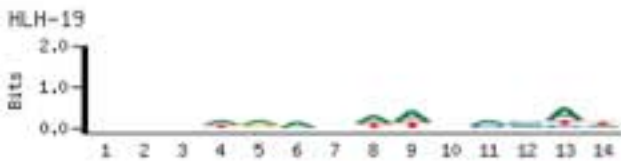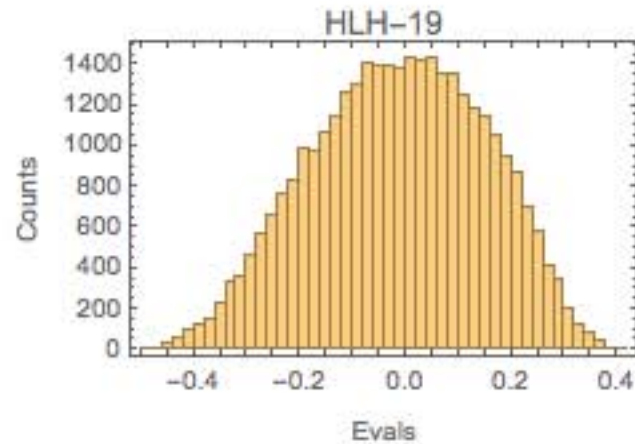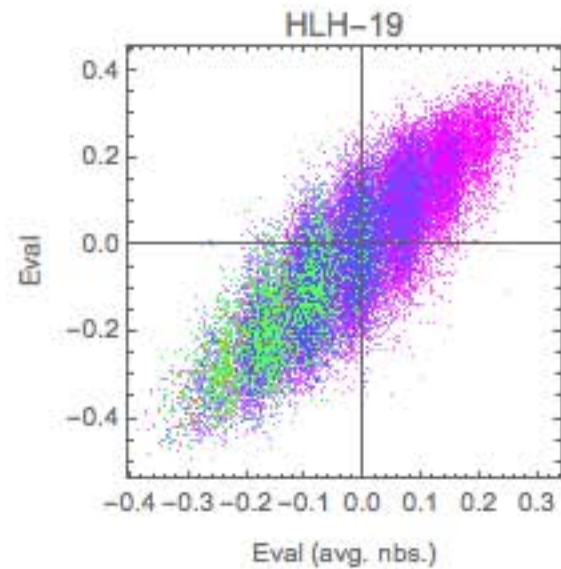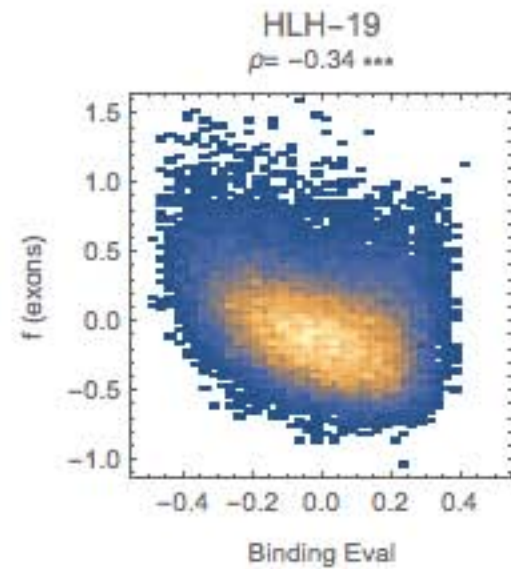

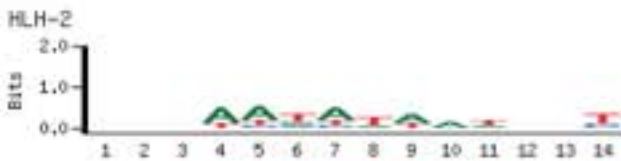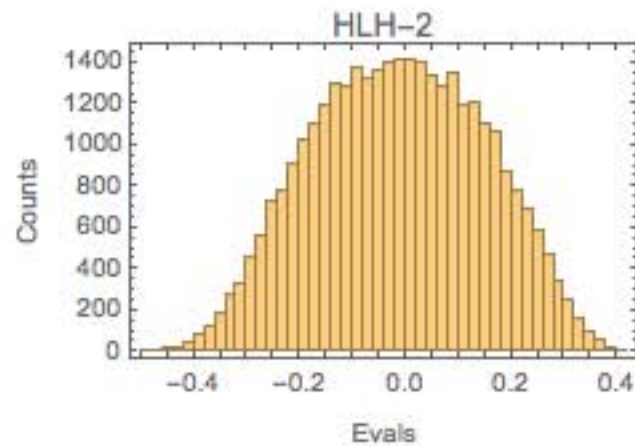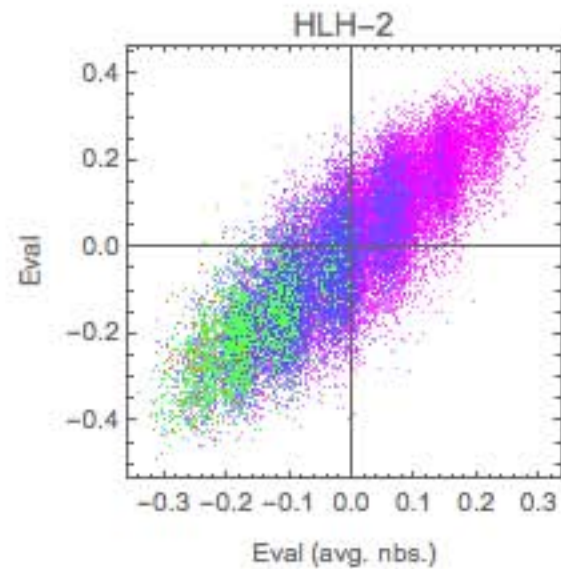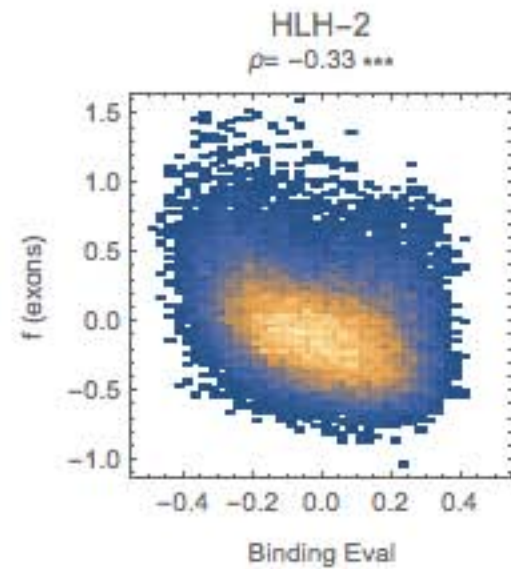

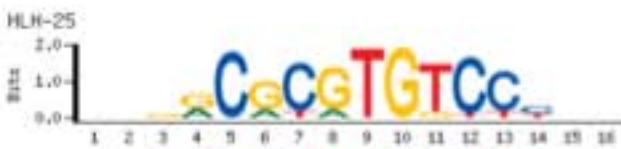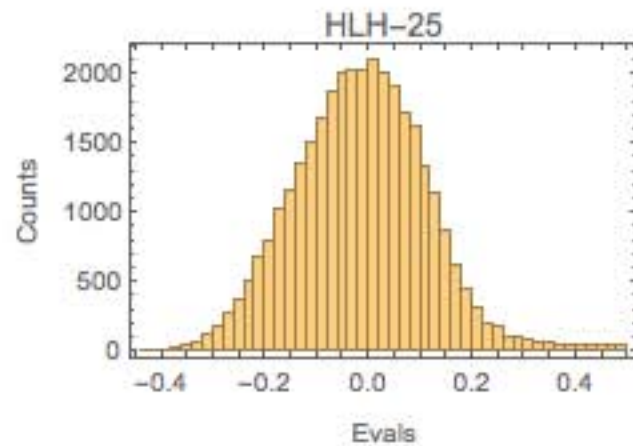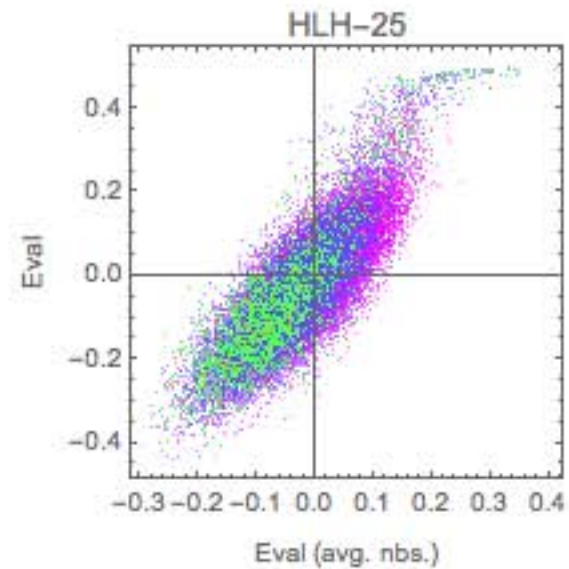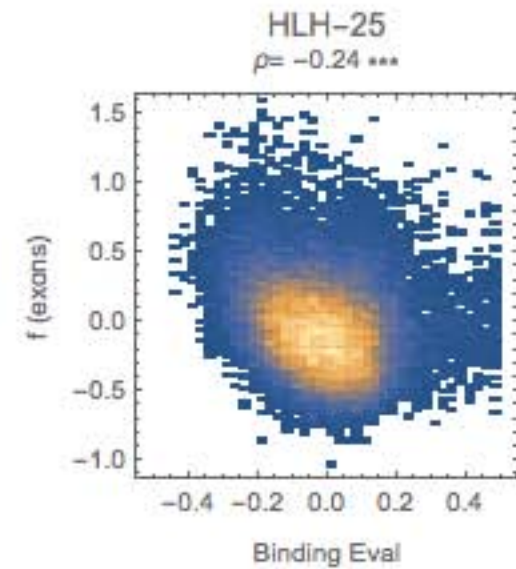

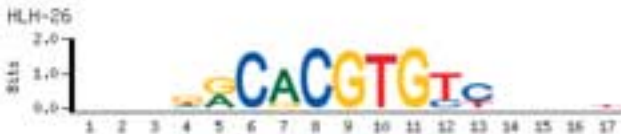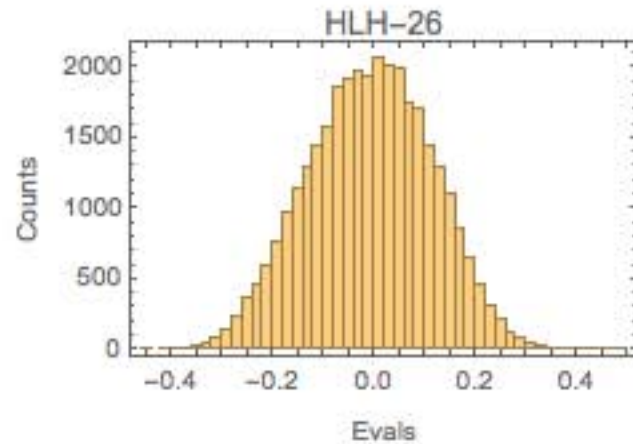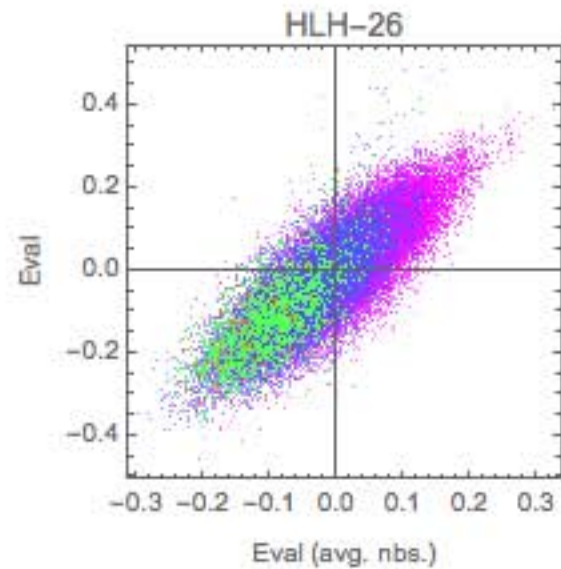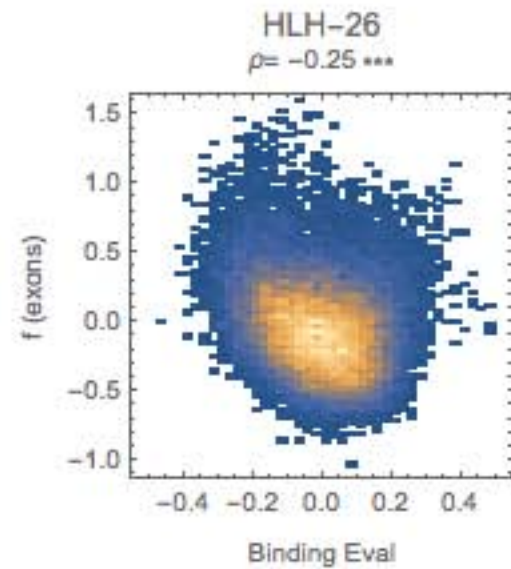



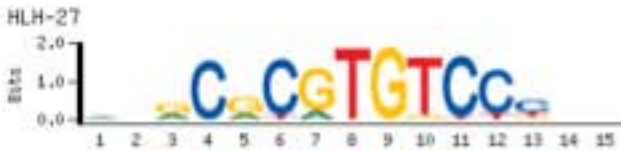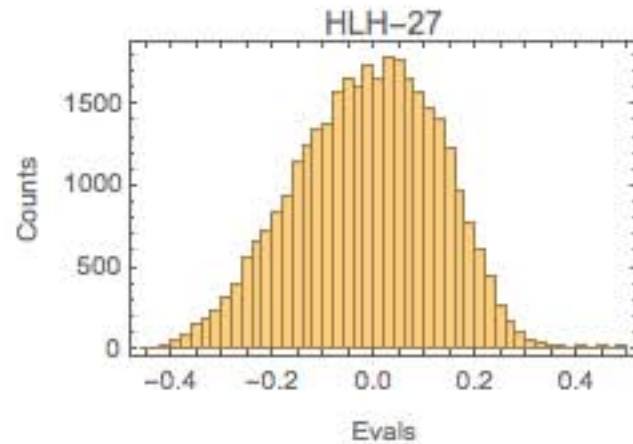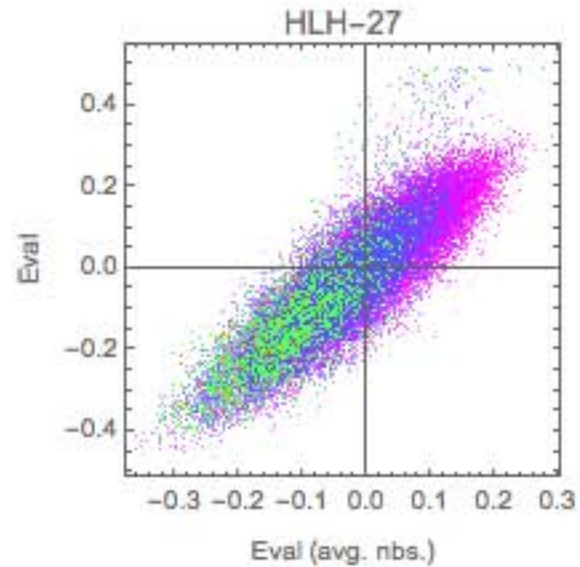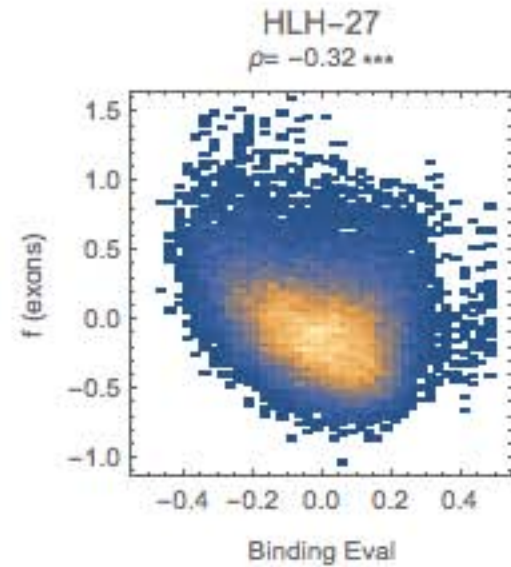

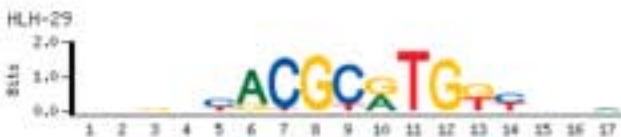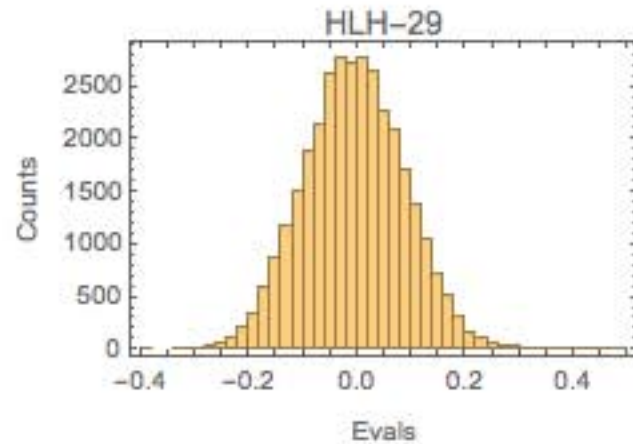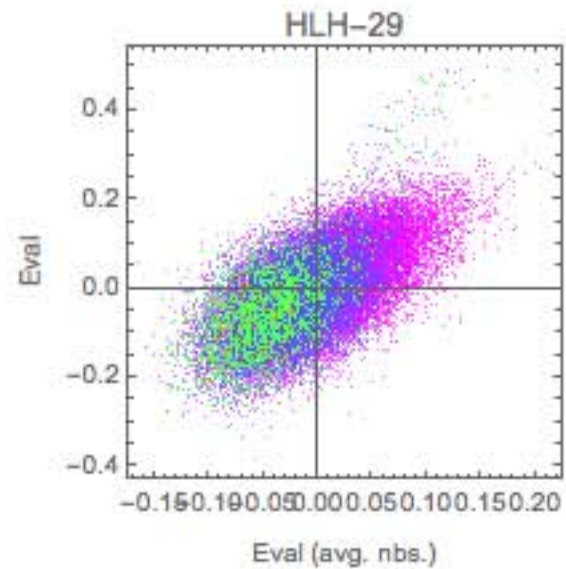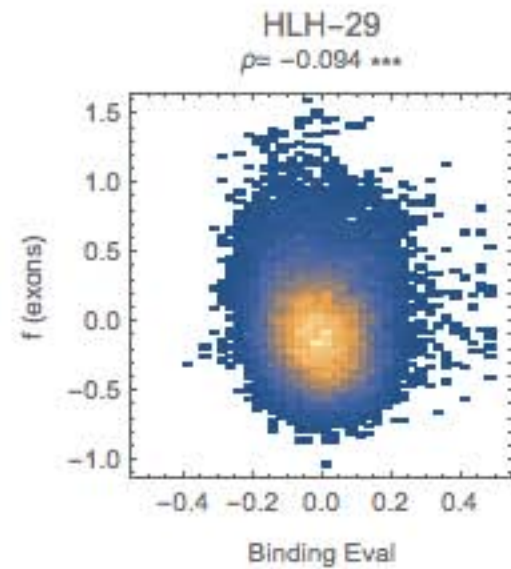

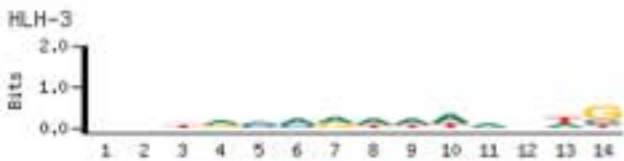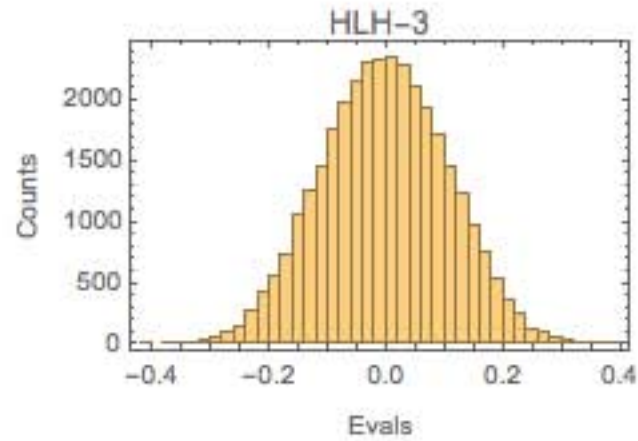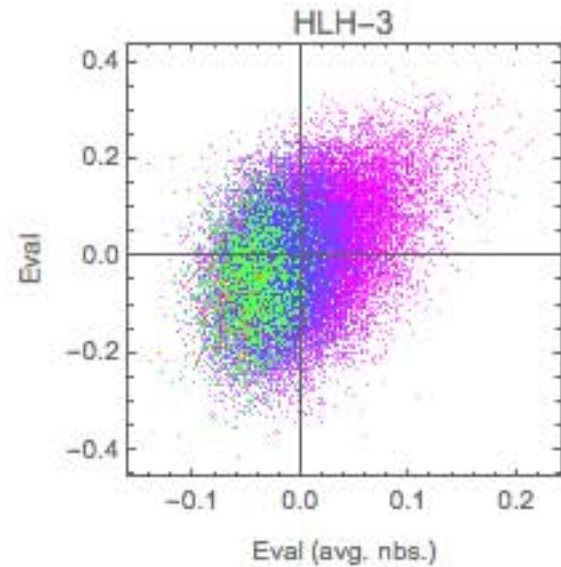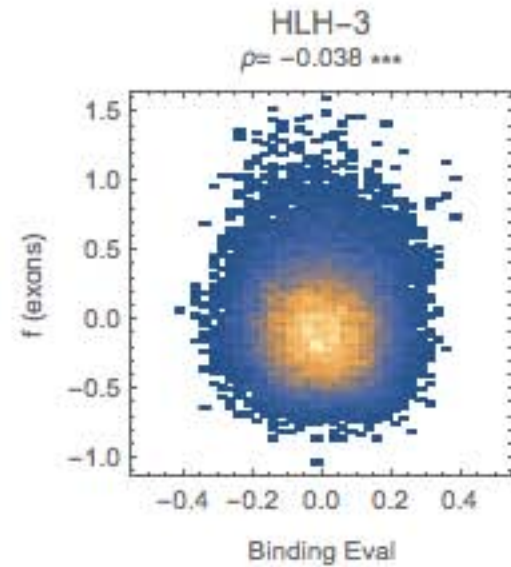

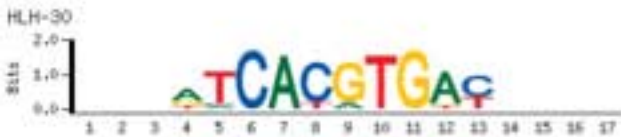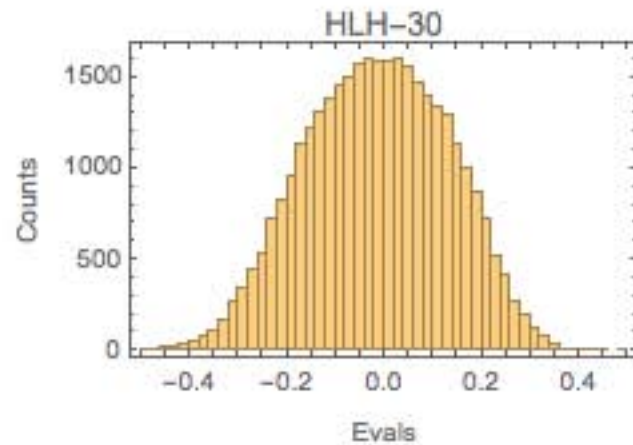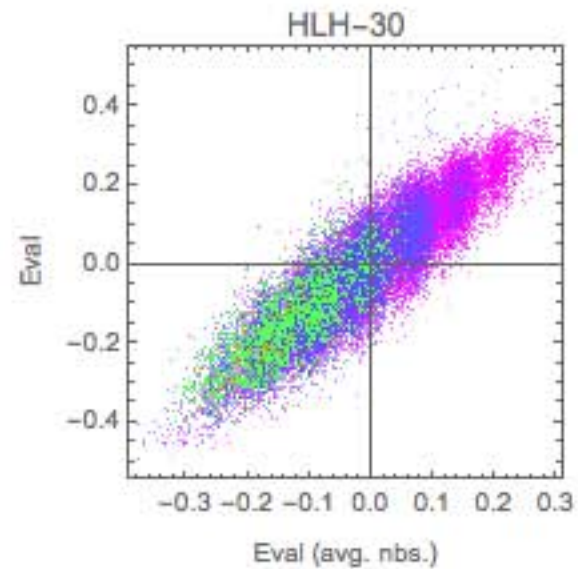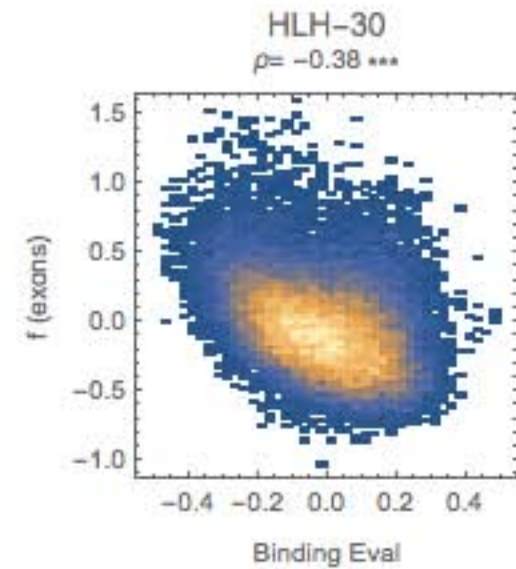



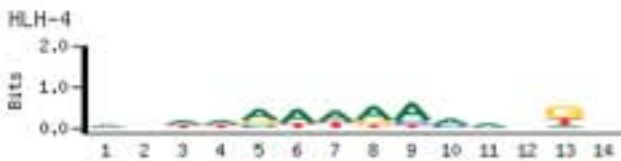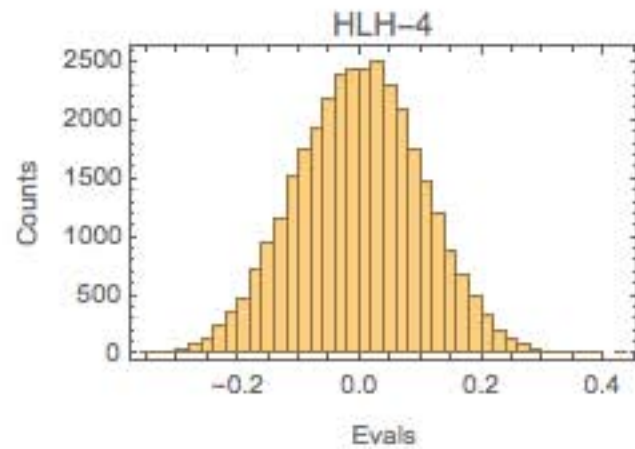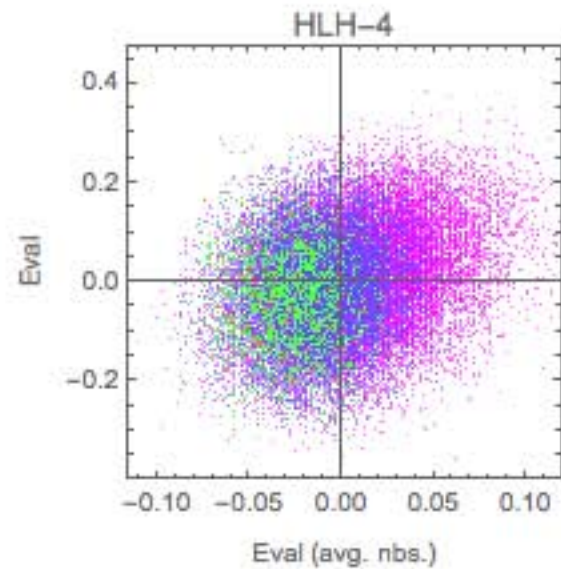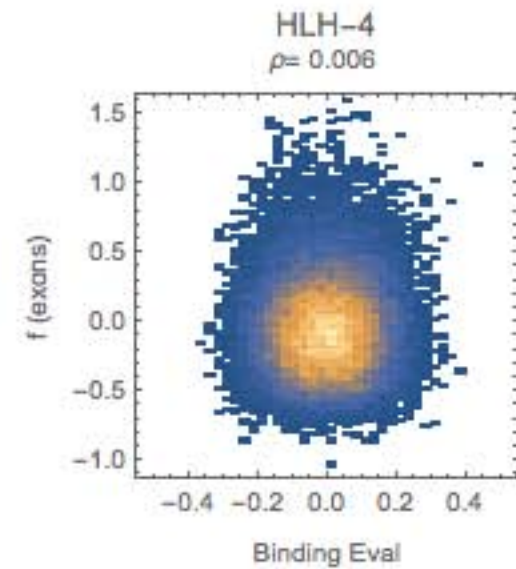

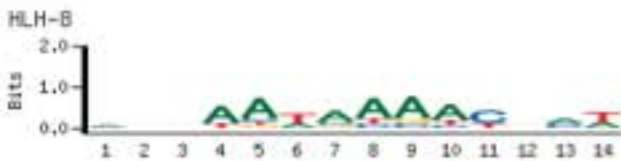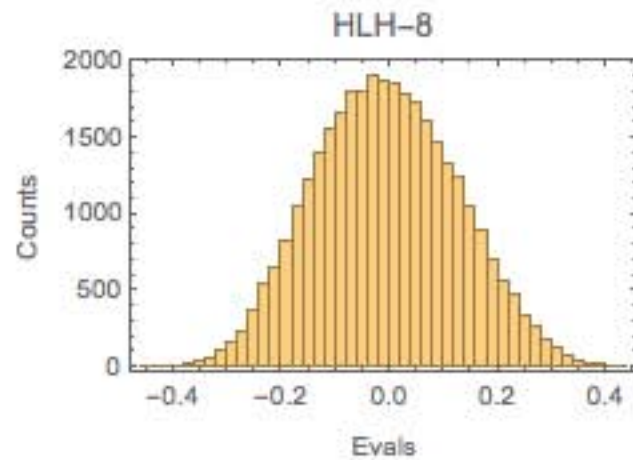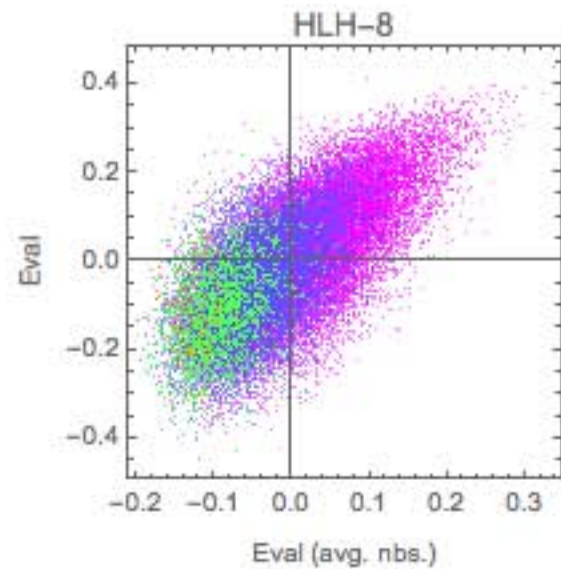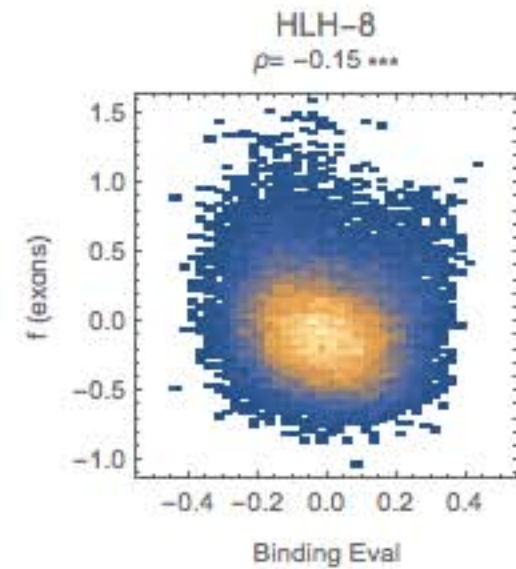

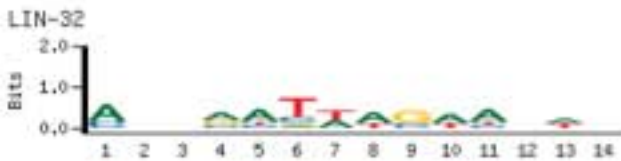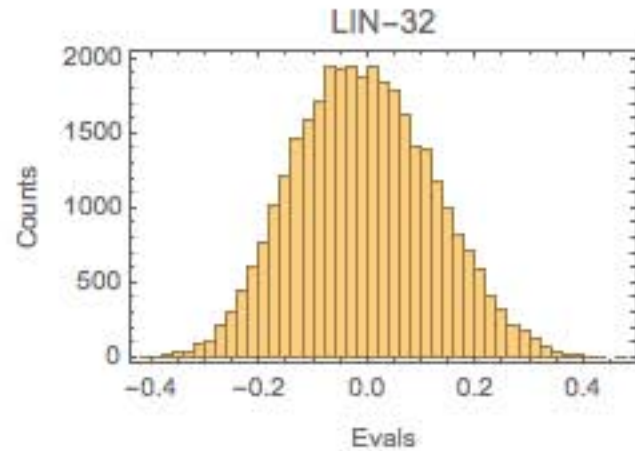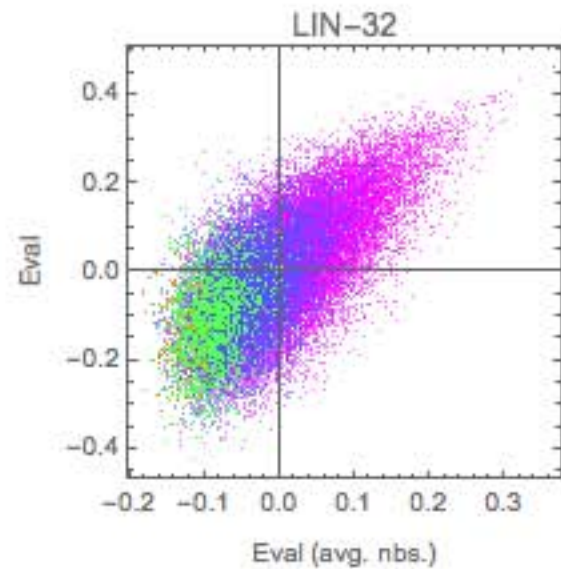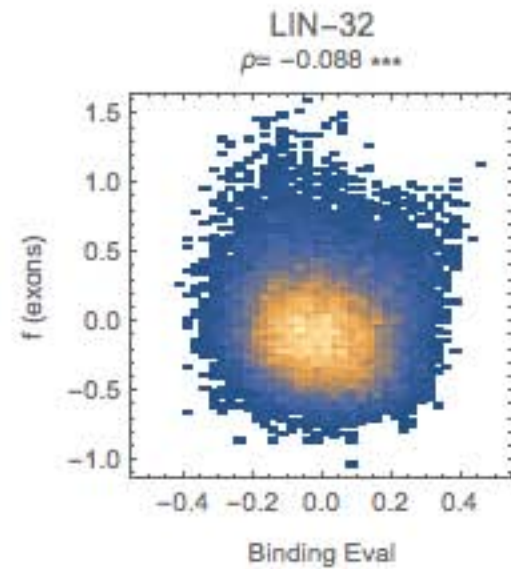

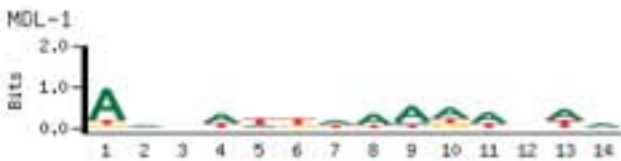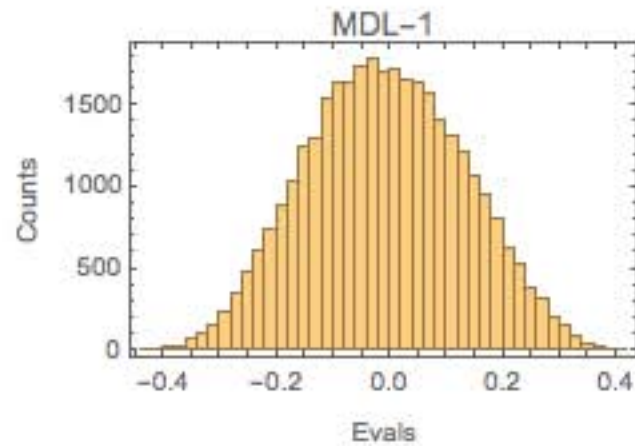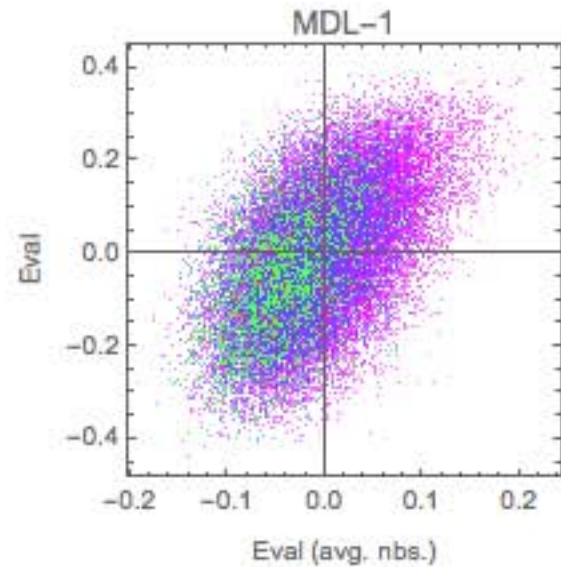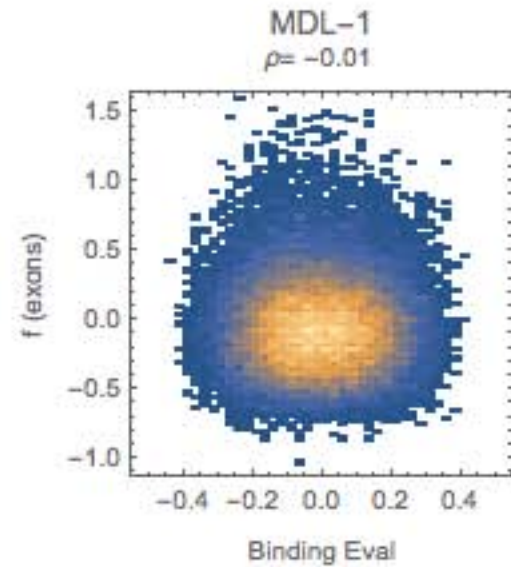



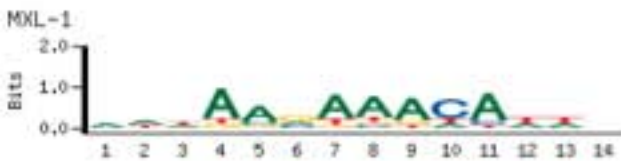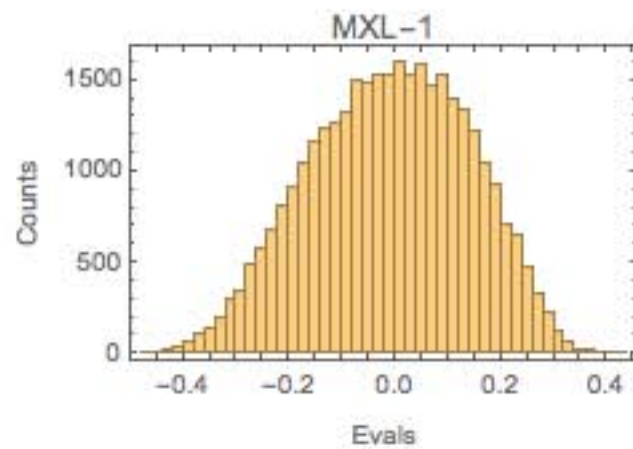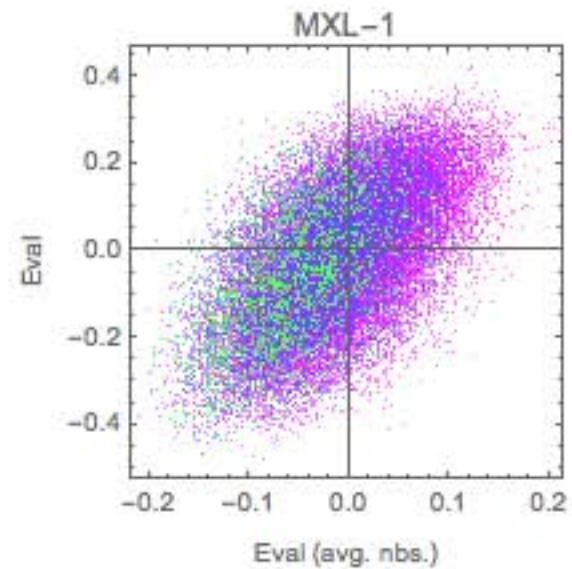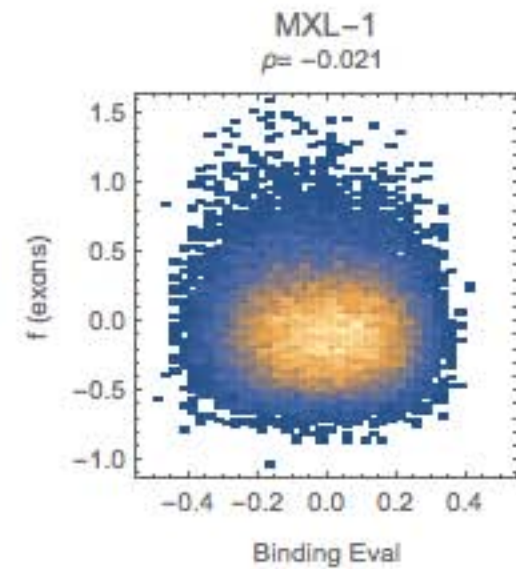

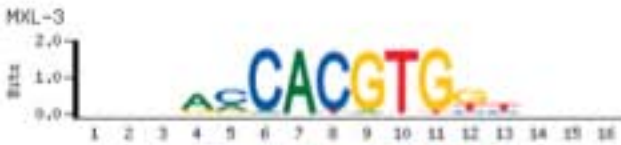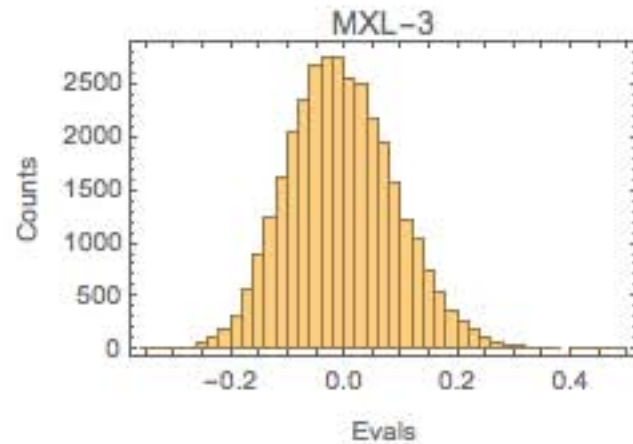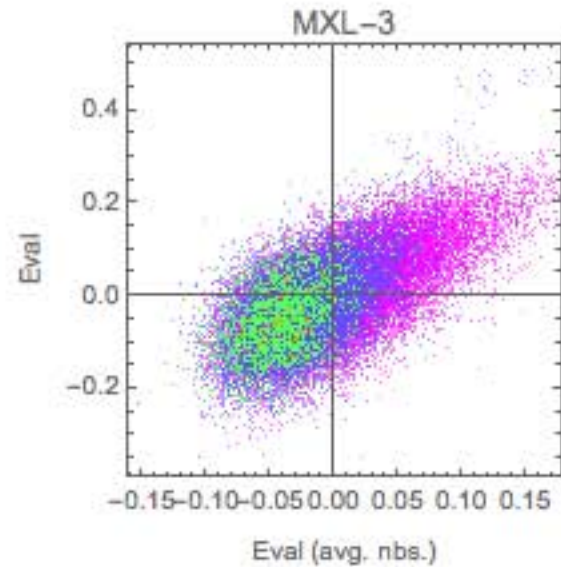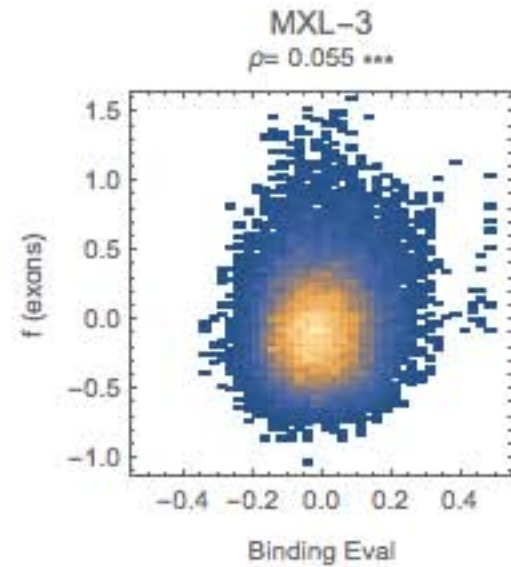

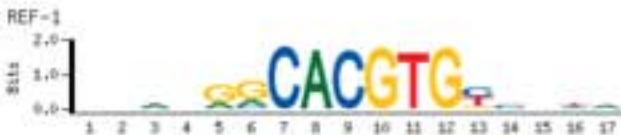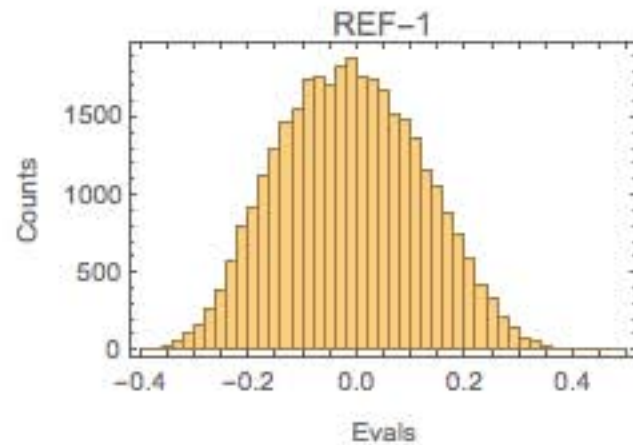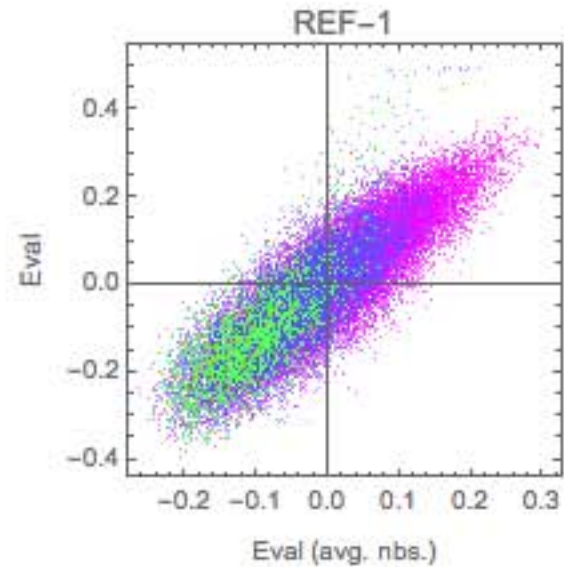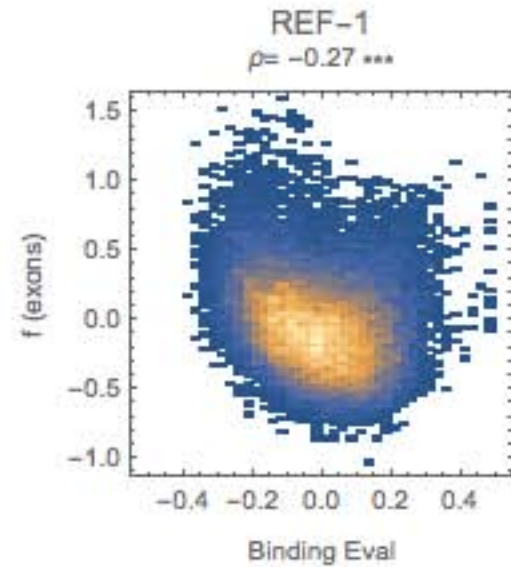

*D. melanogaster*



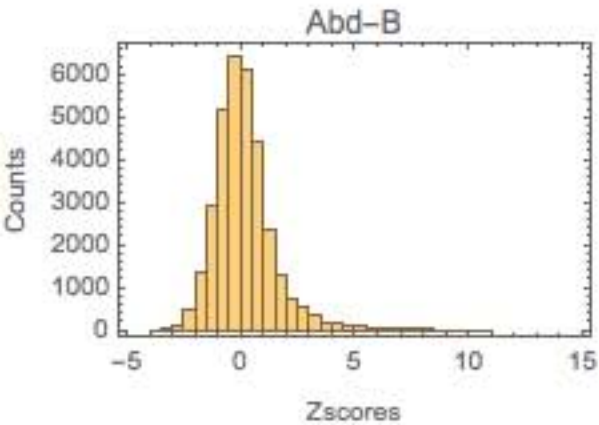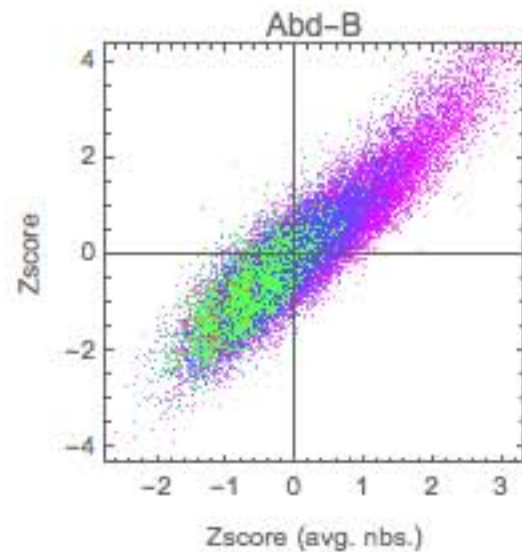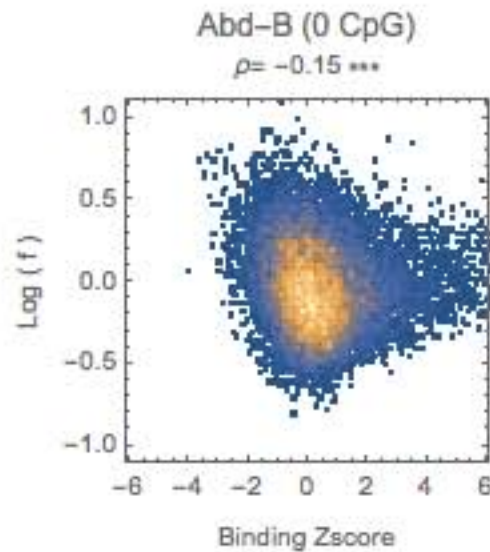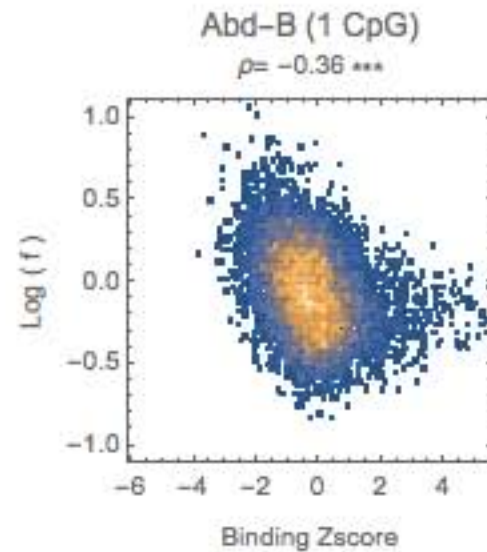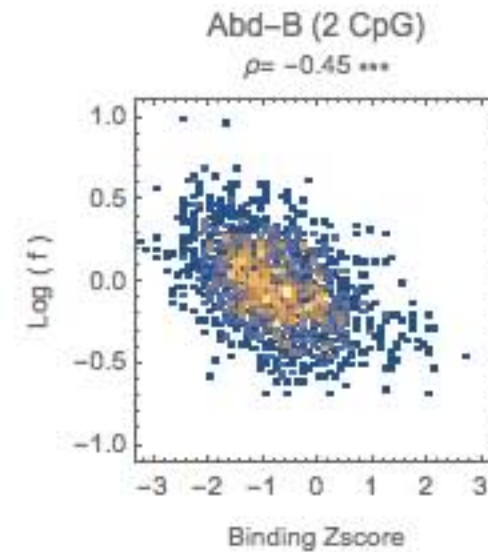

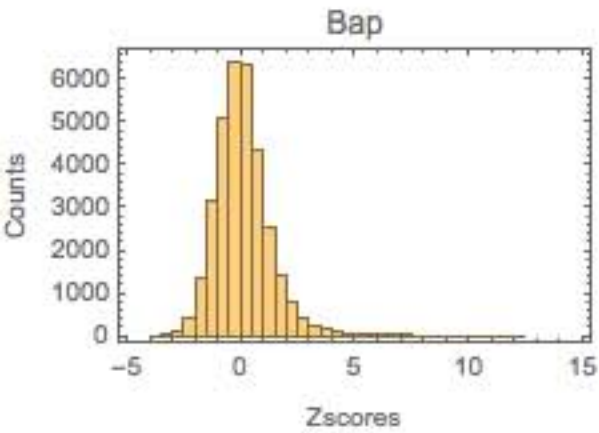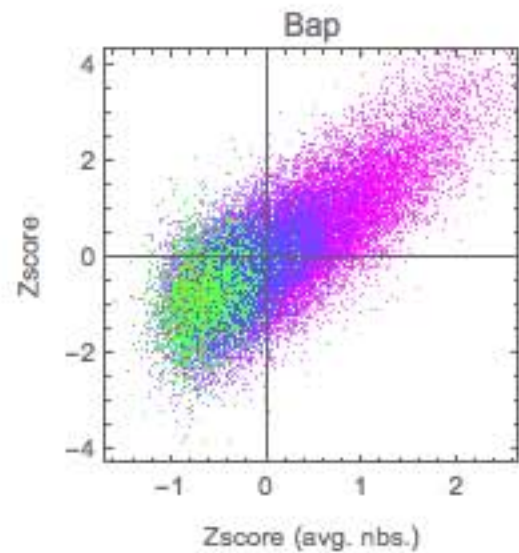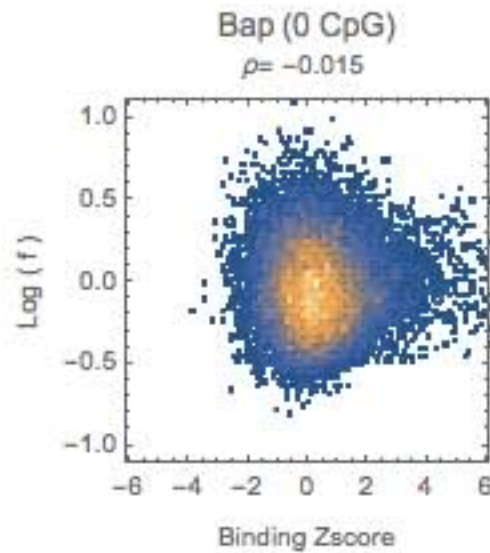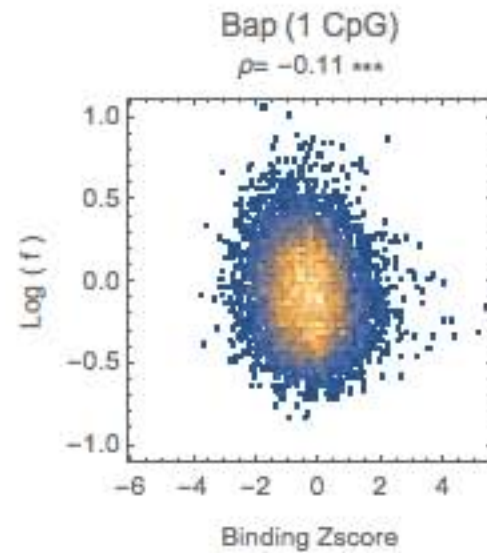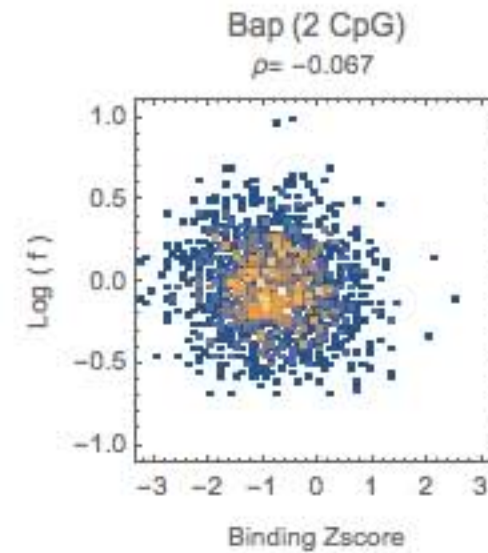

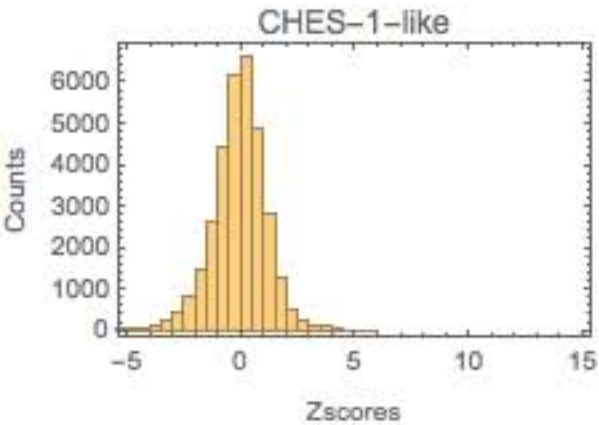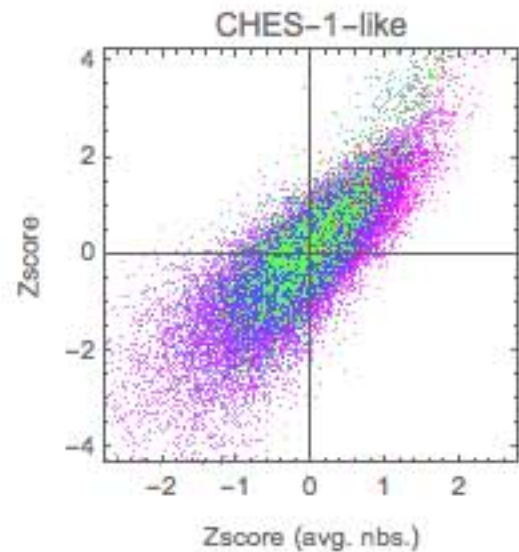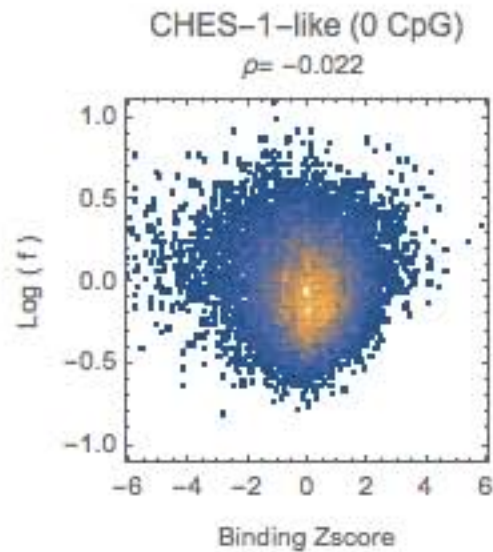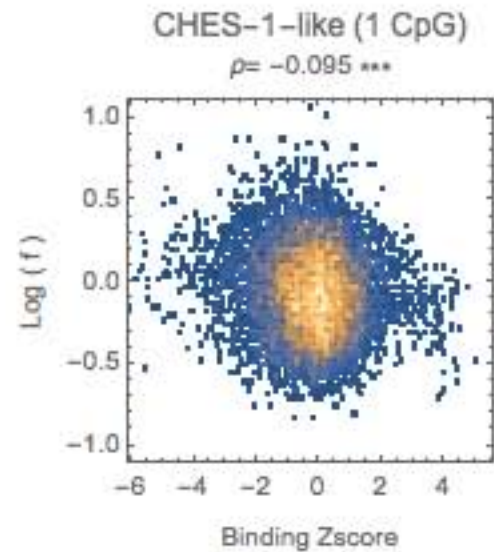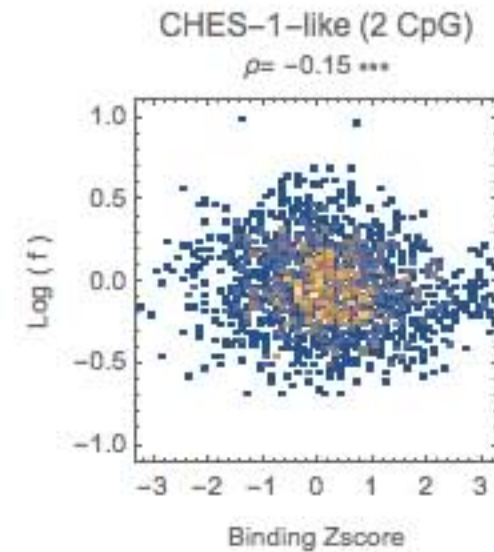

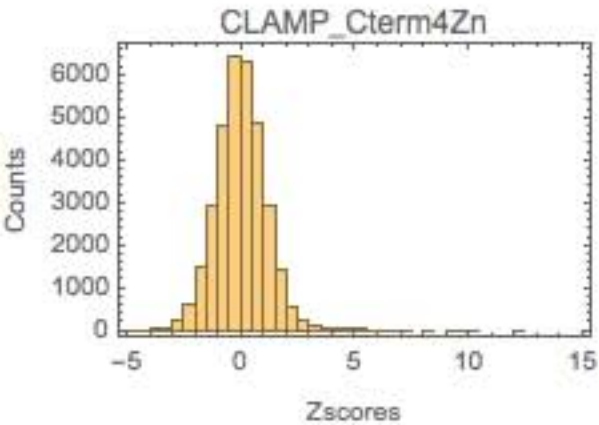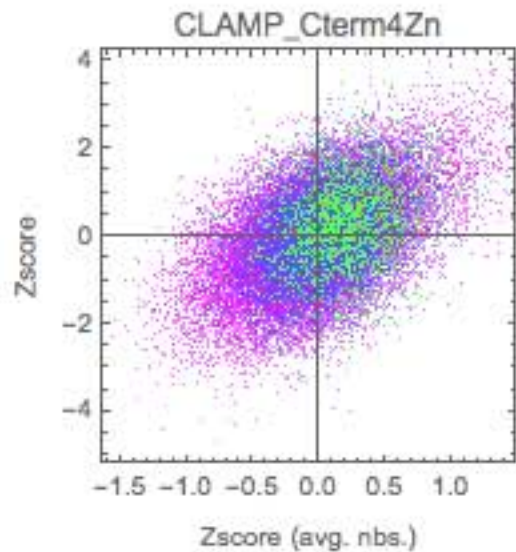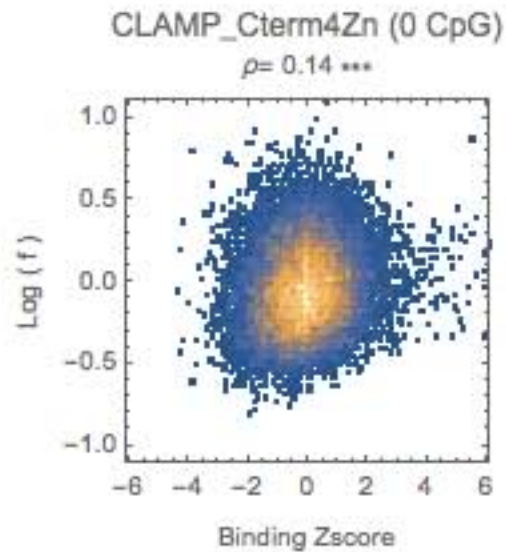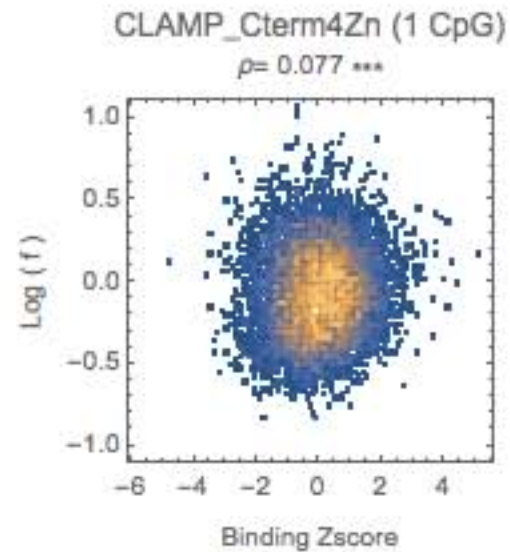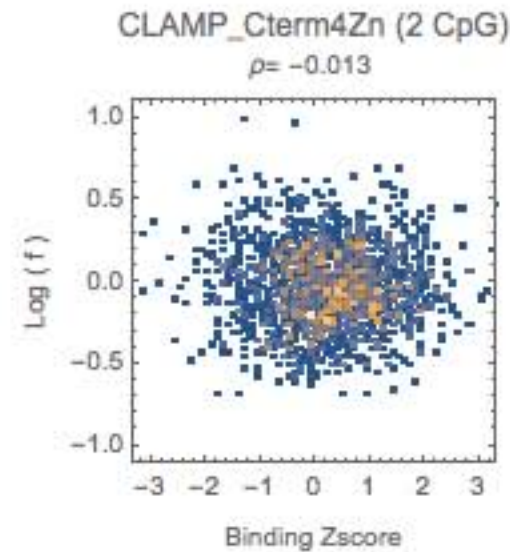



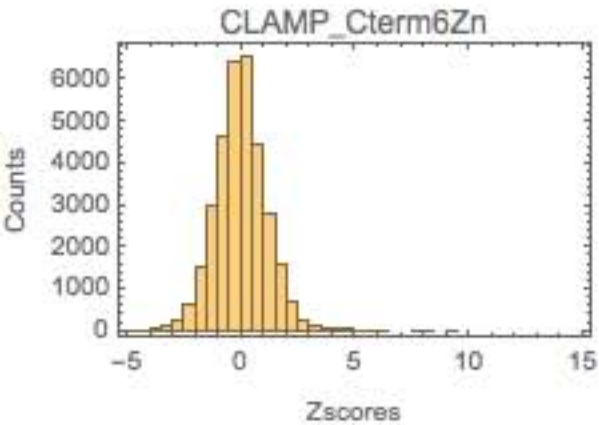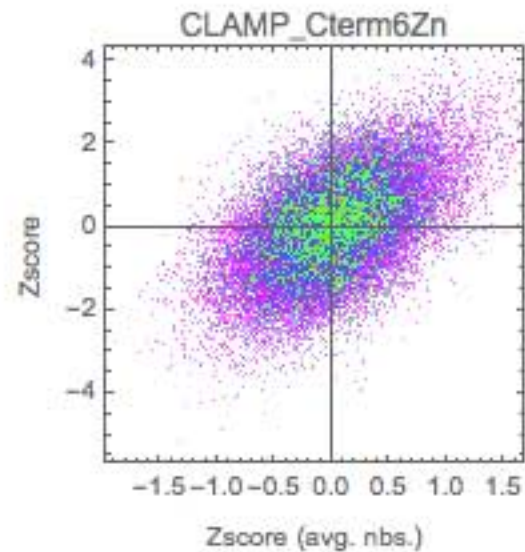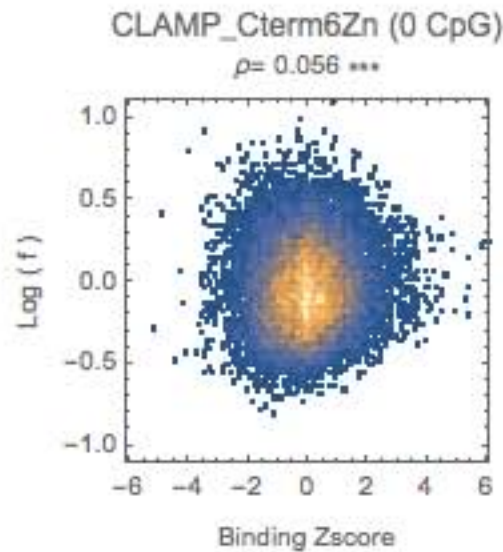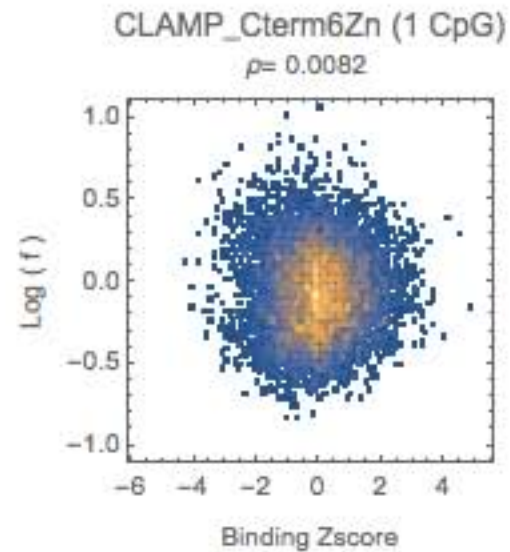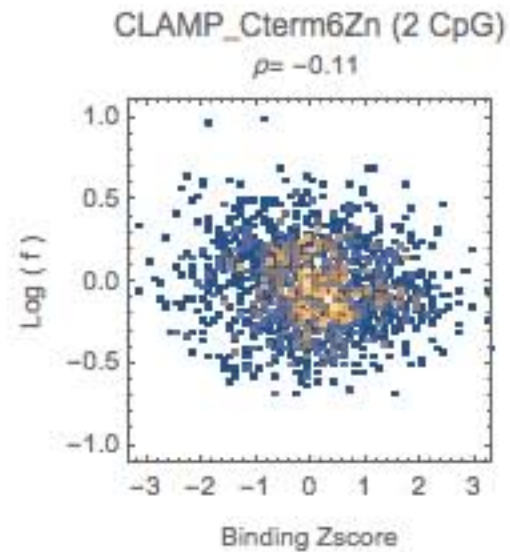

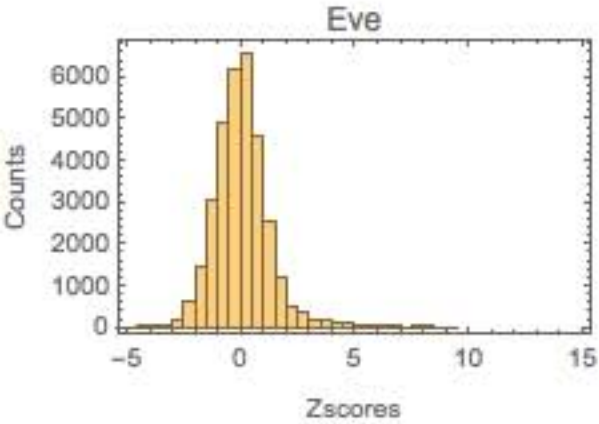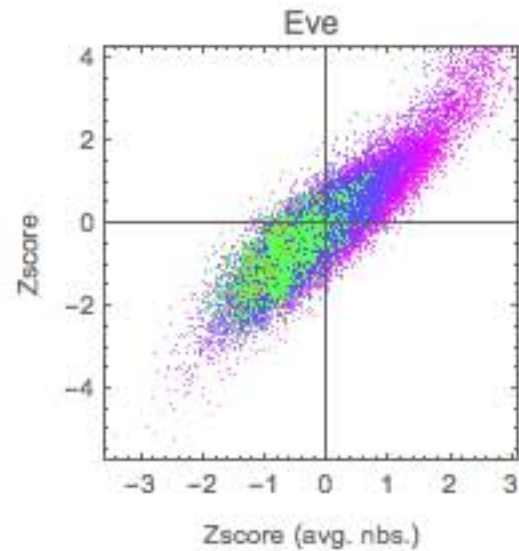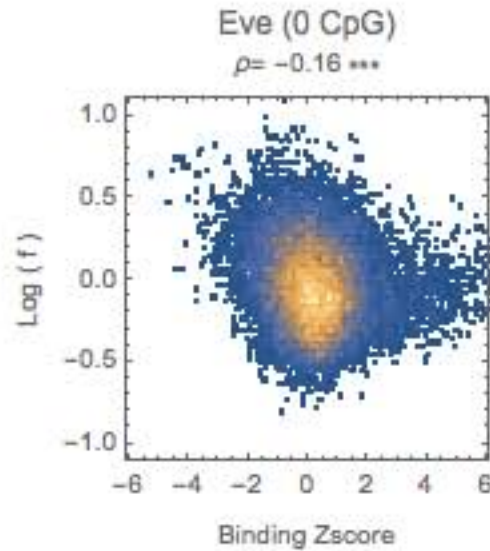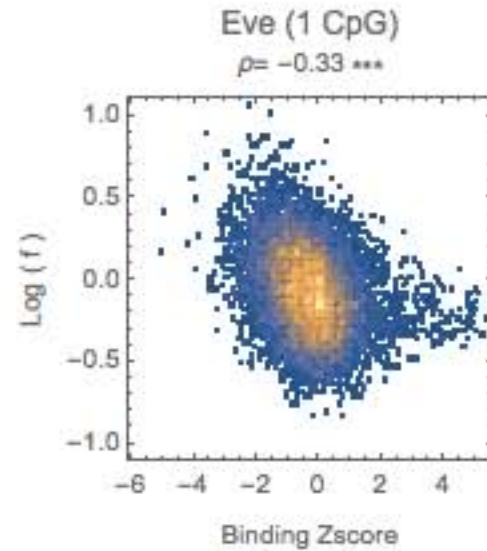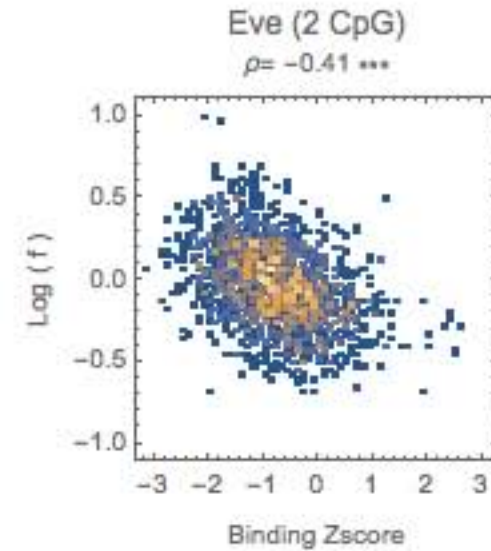

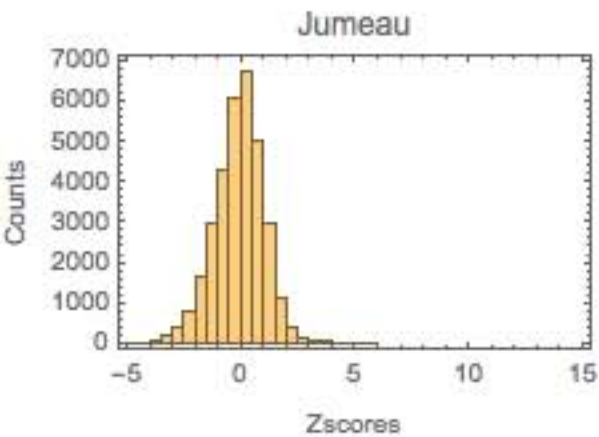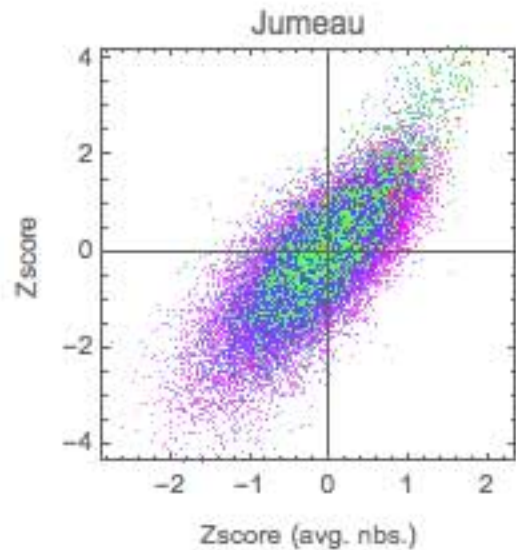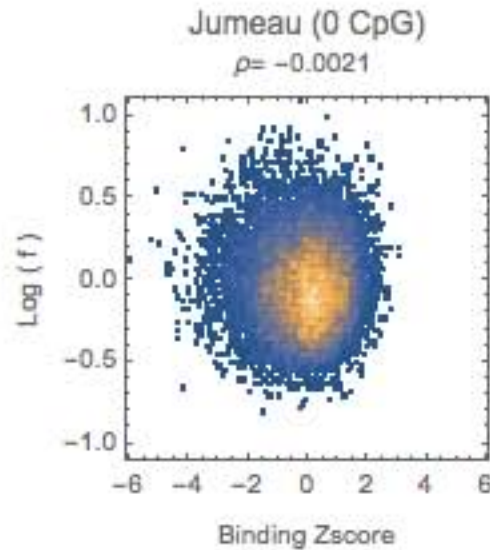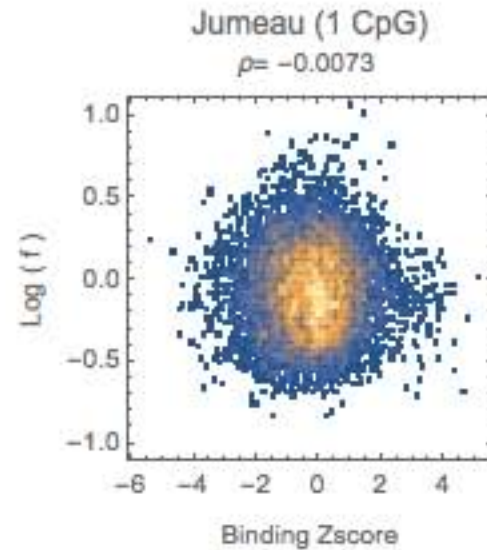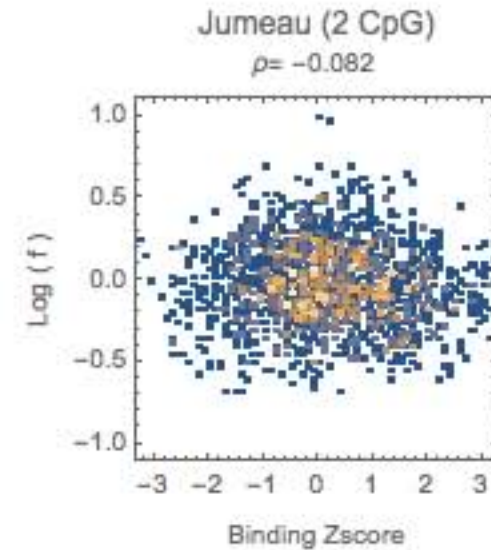

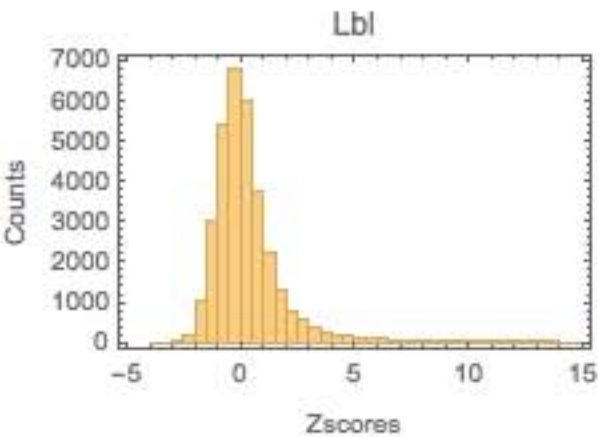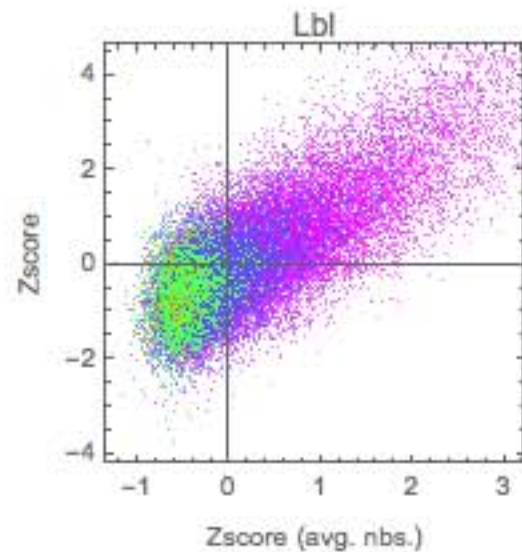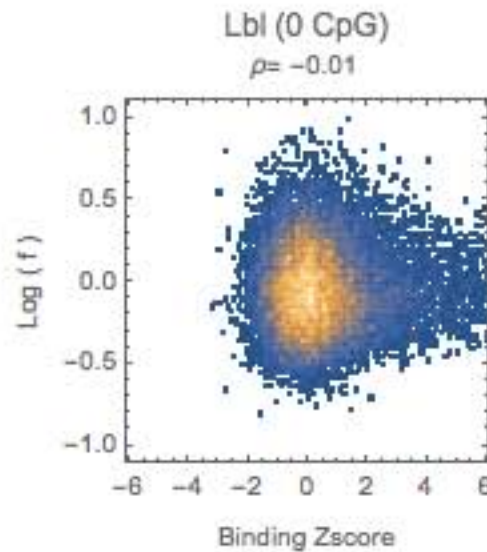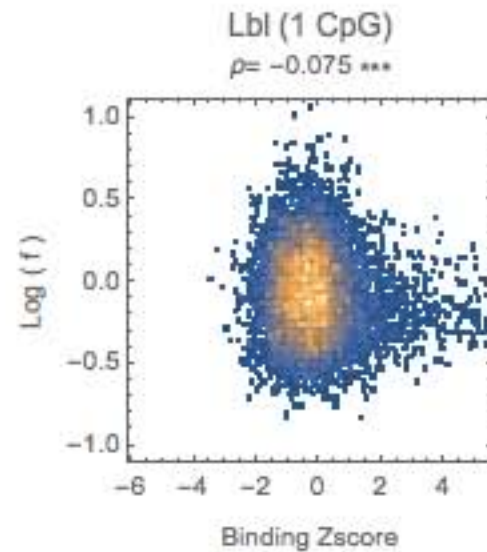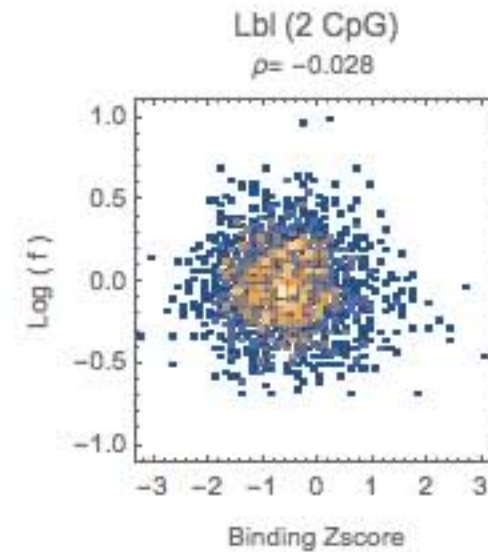



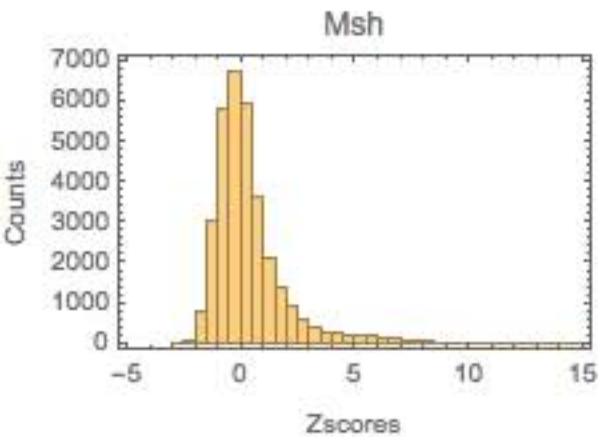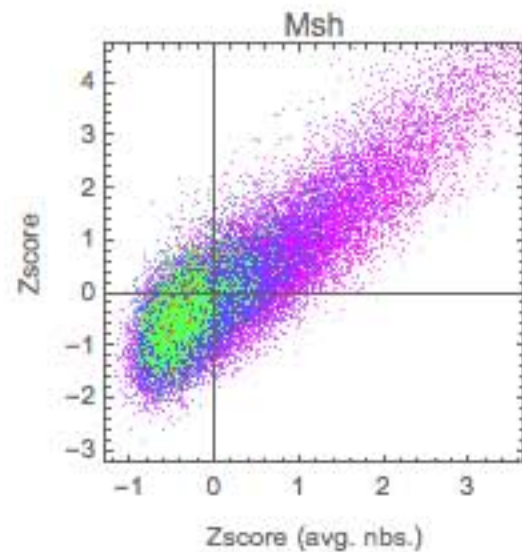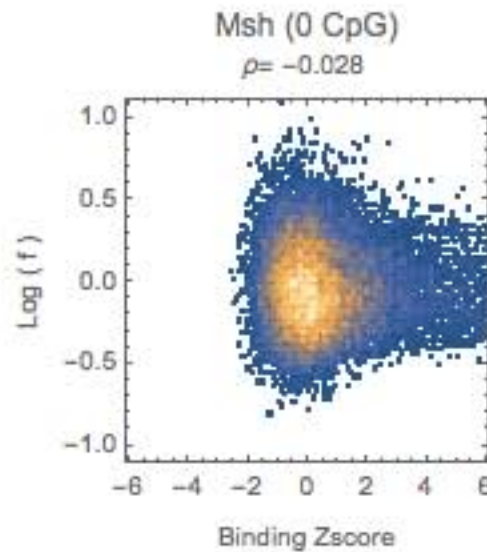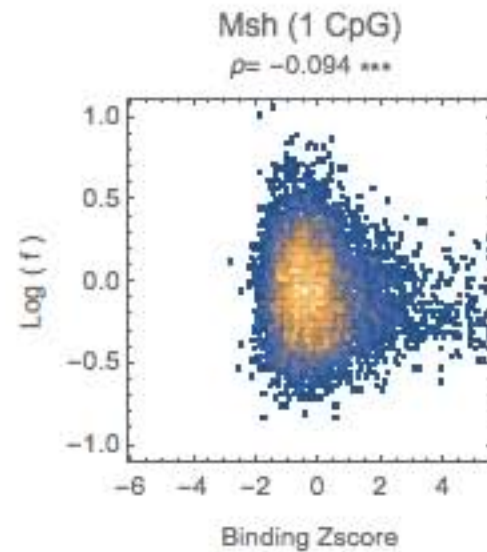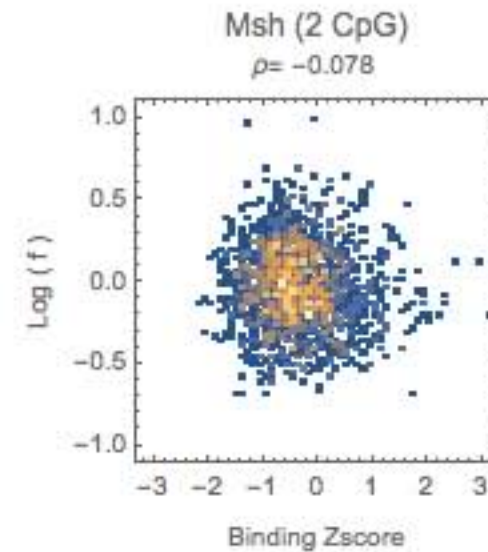

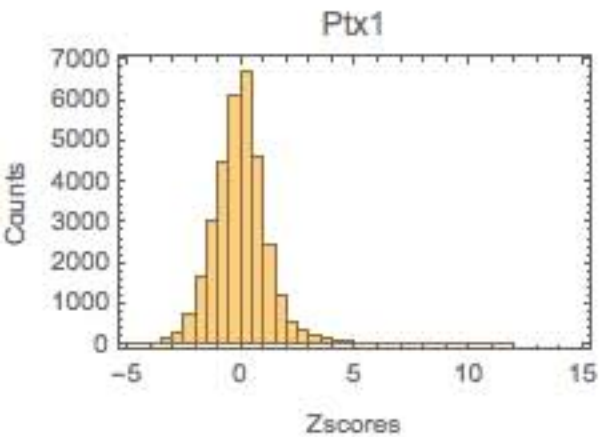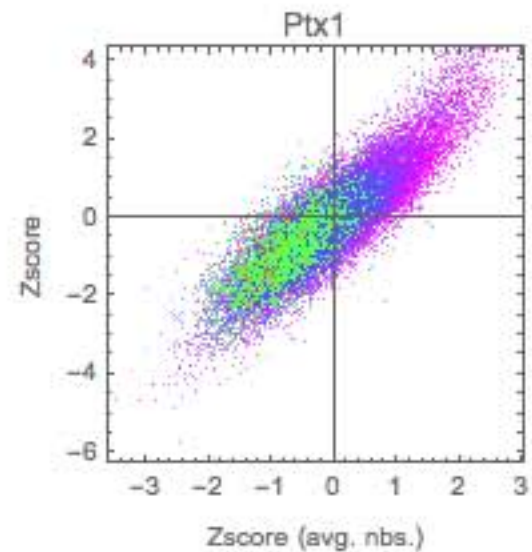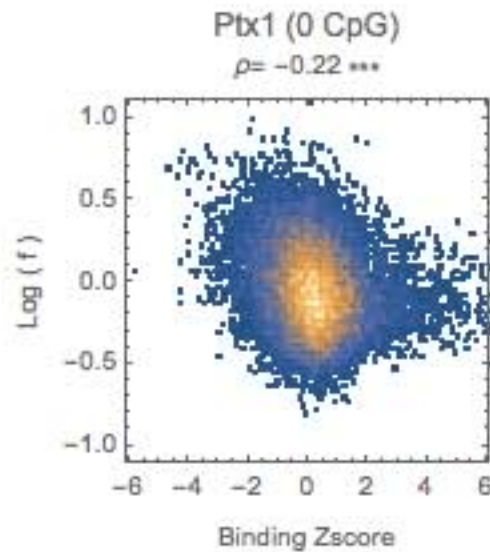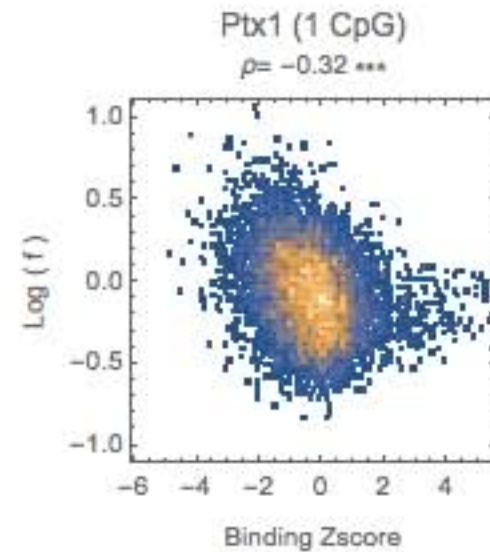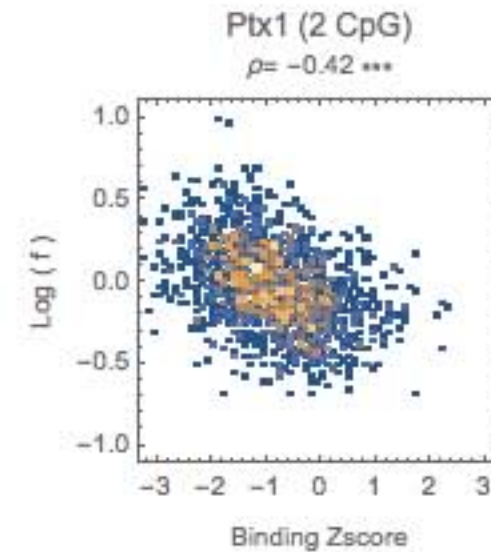

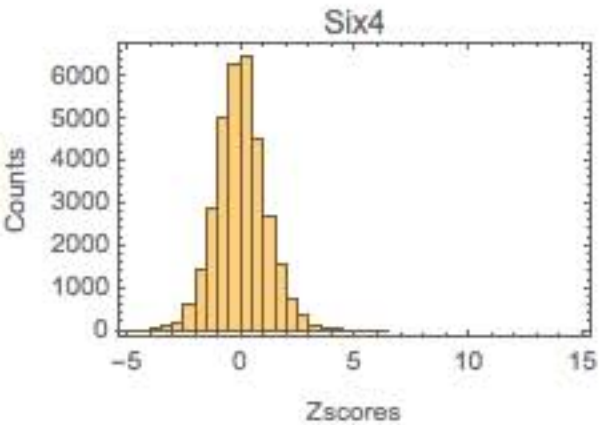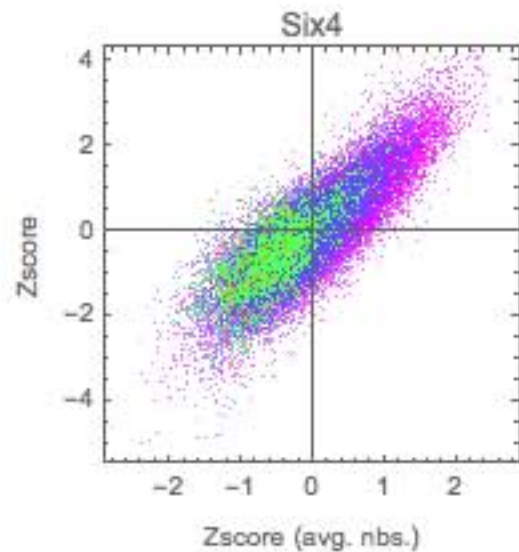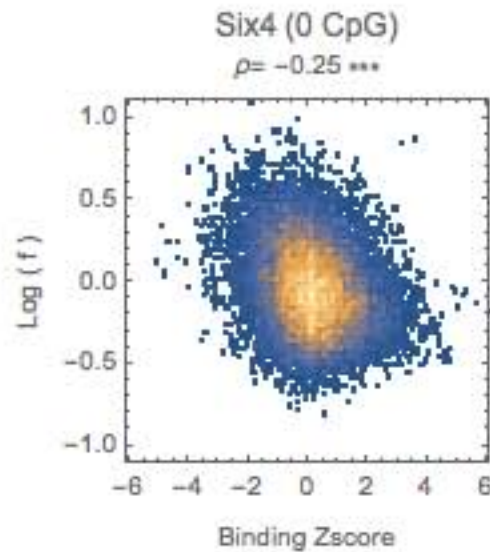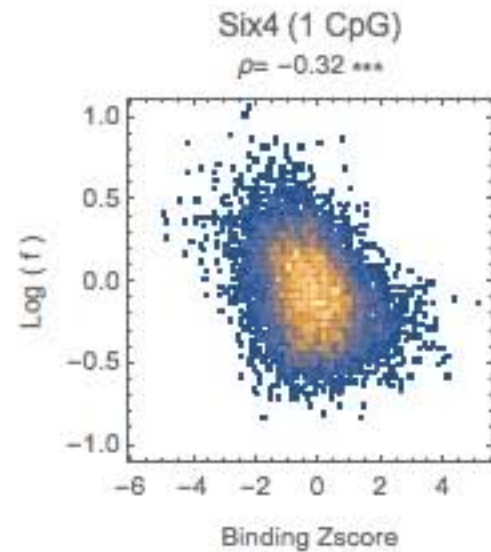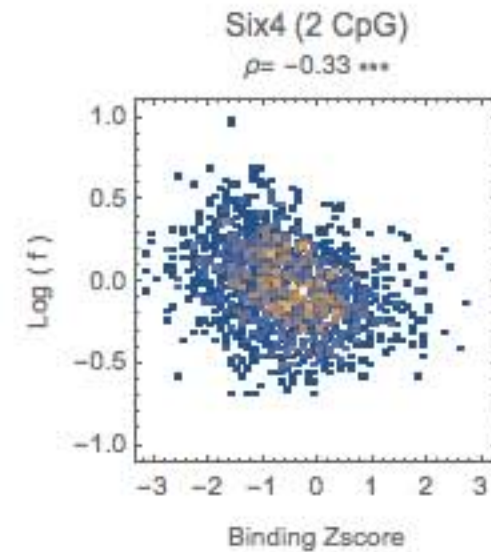

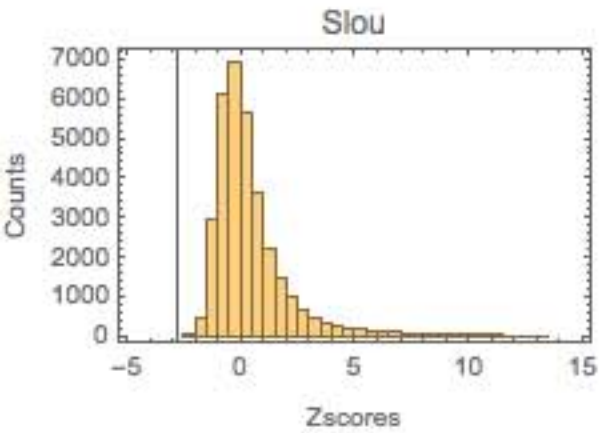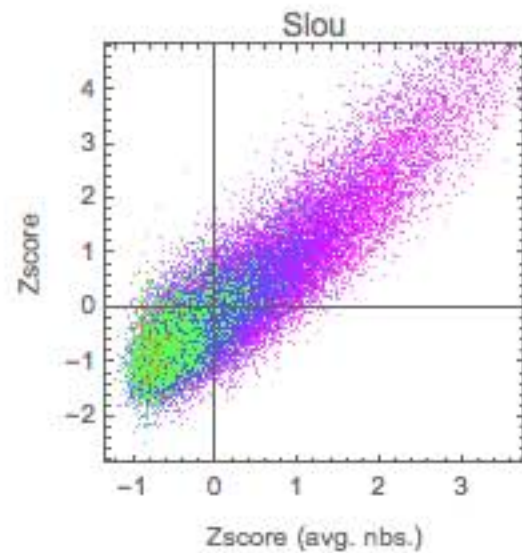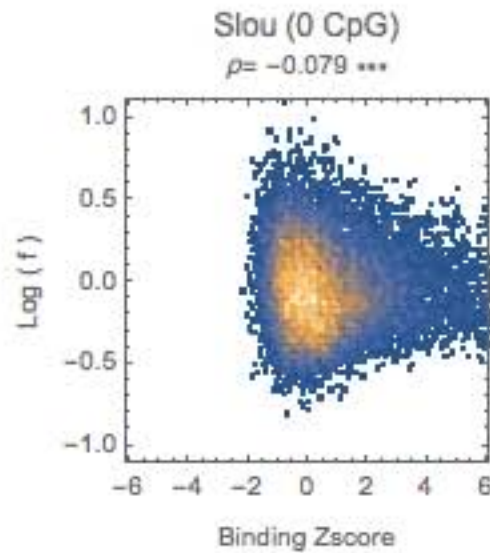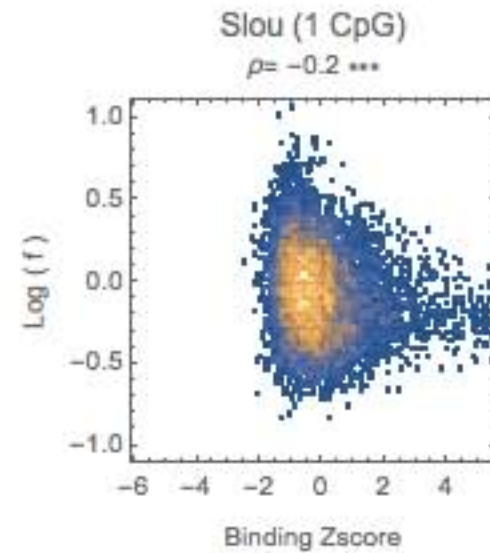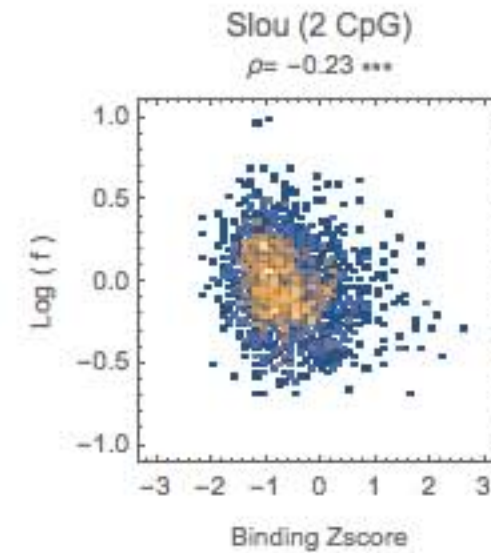



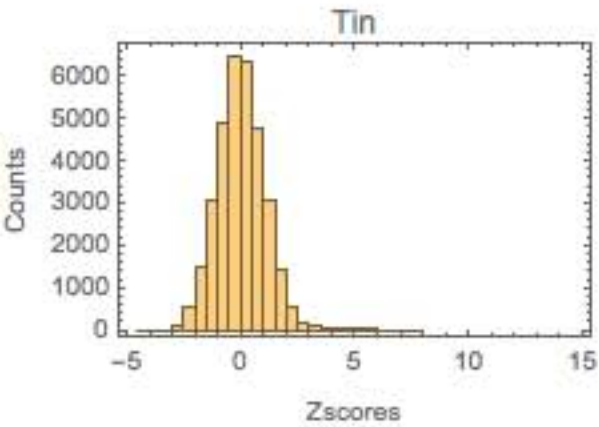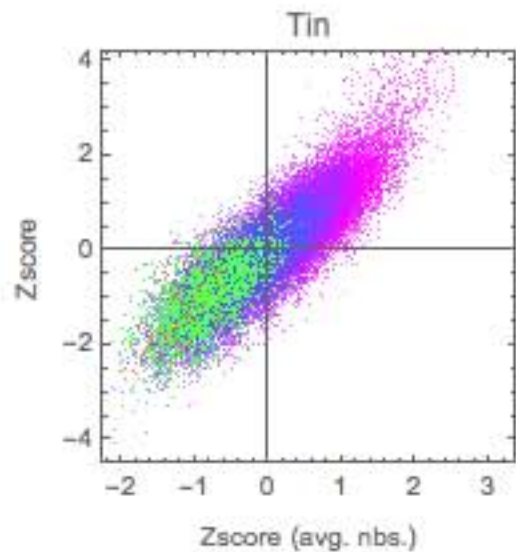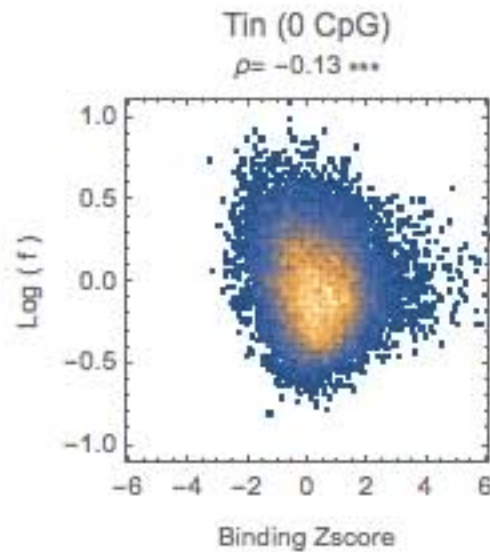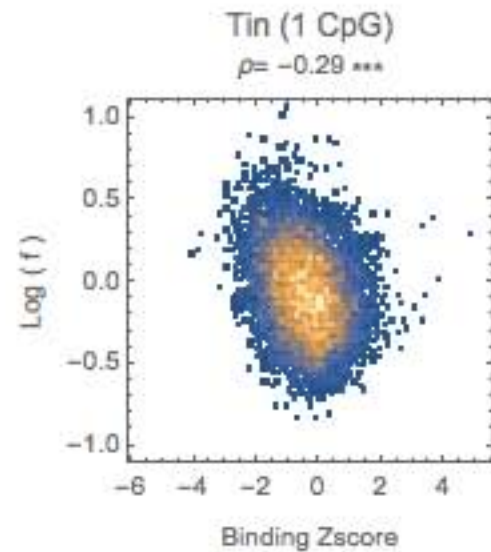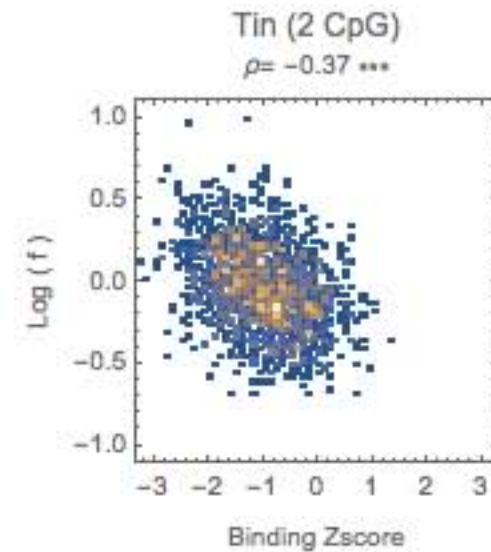

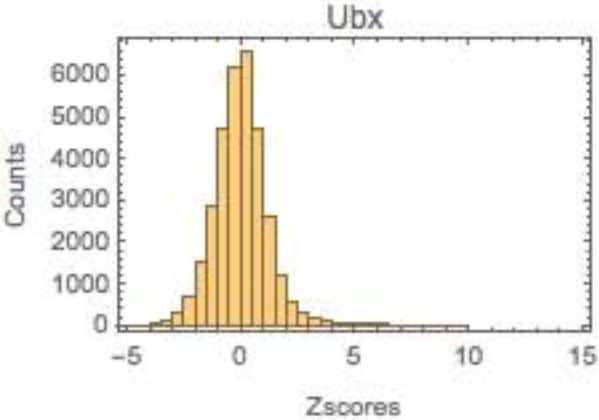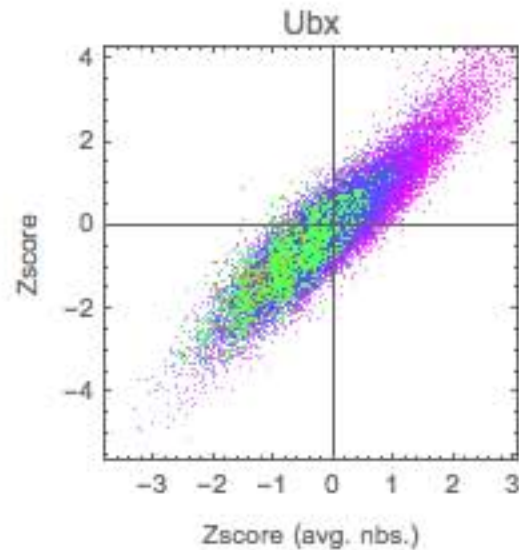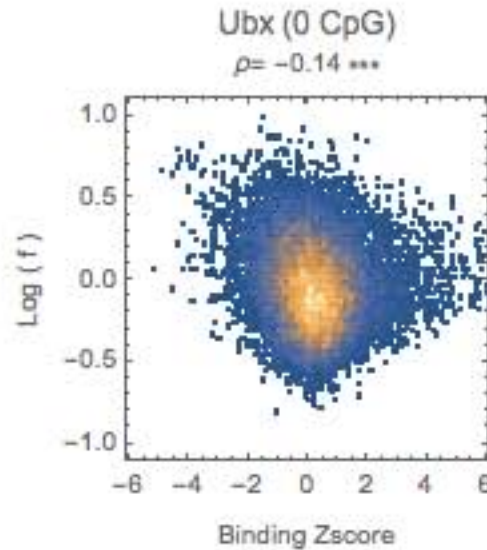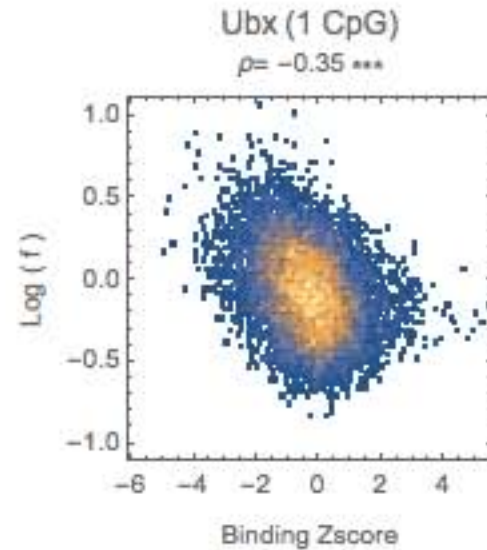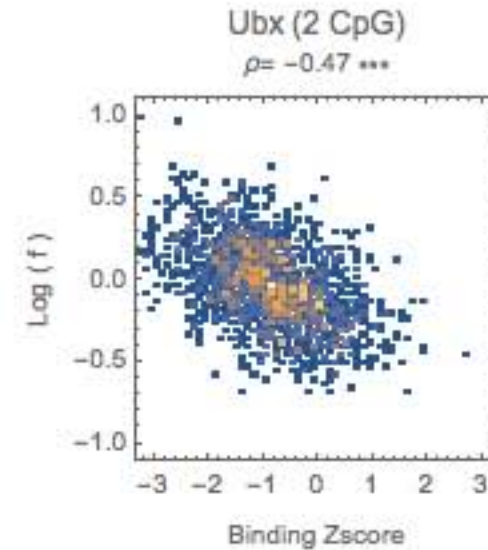

*H. sapiens*

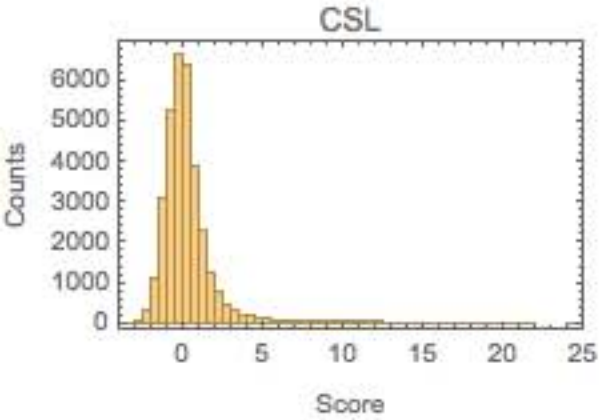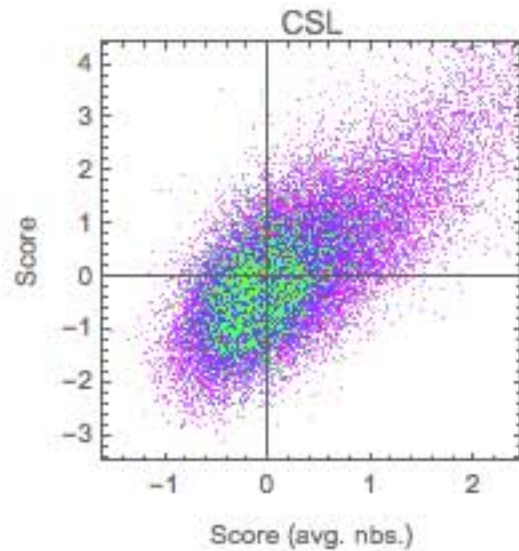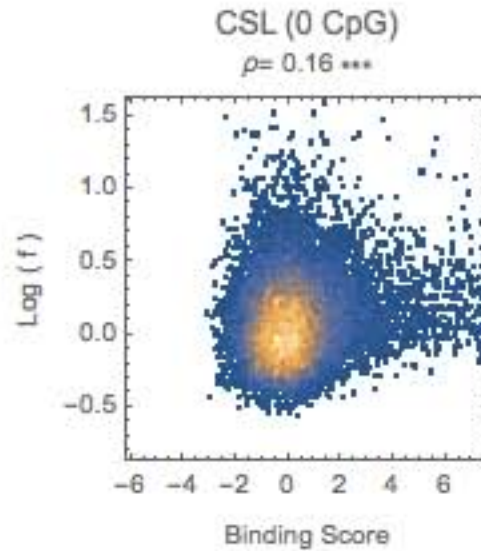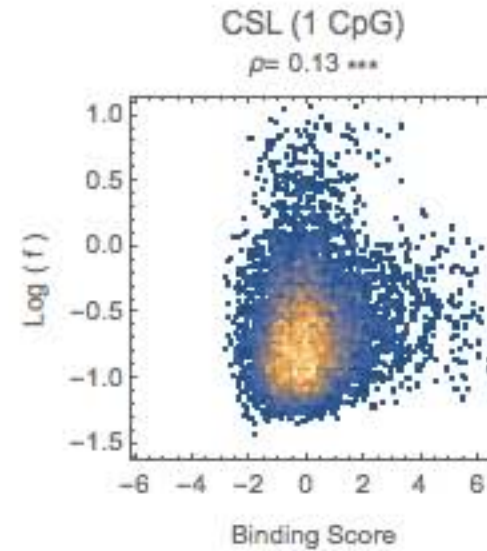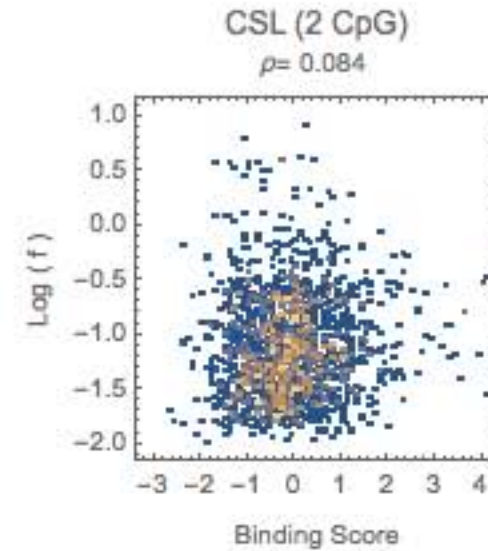



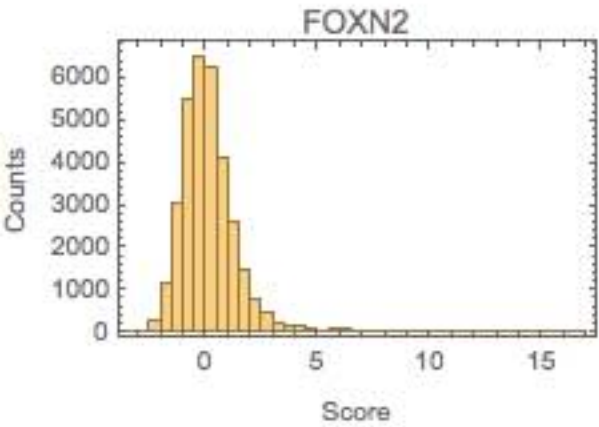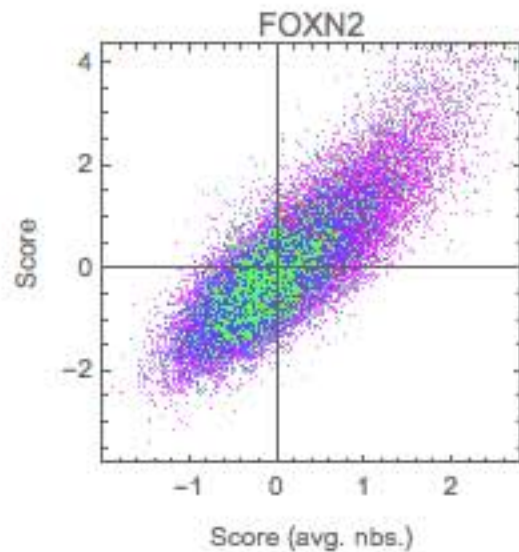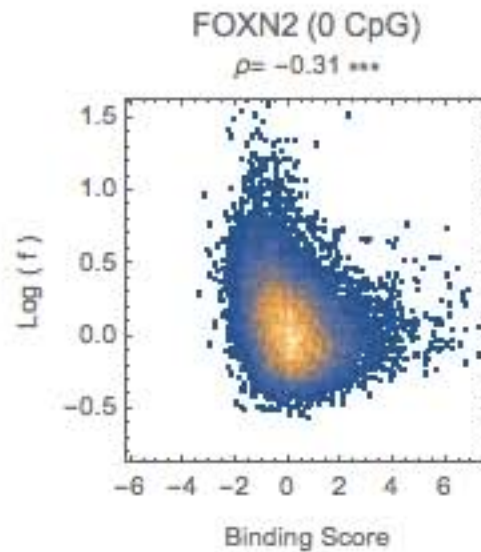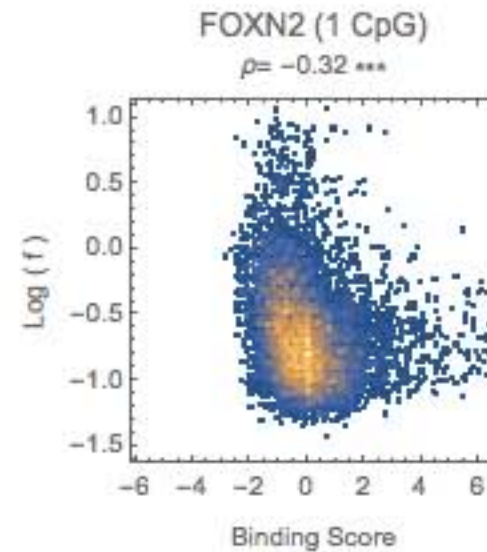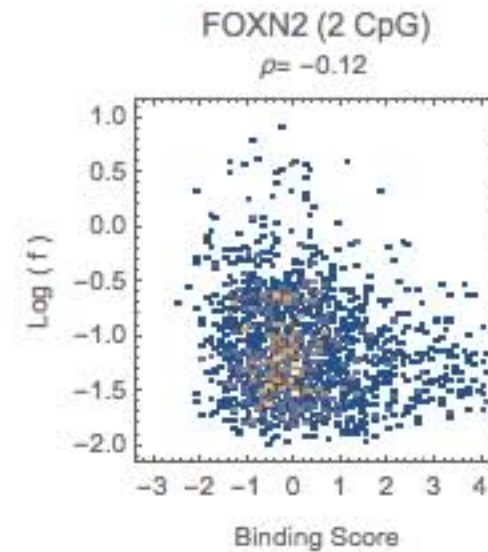

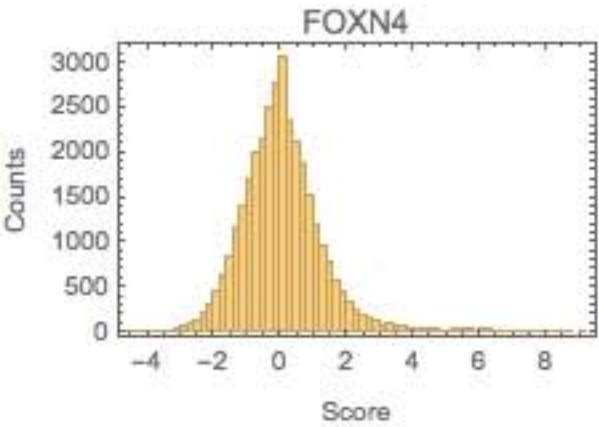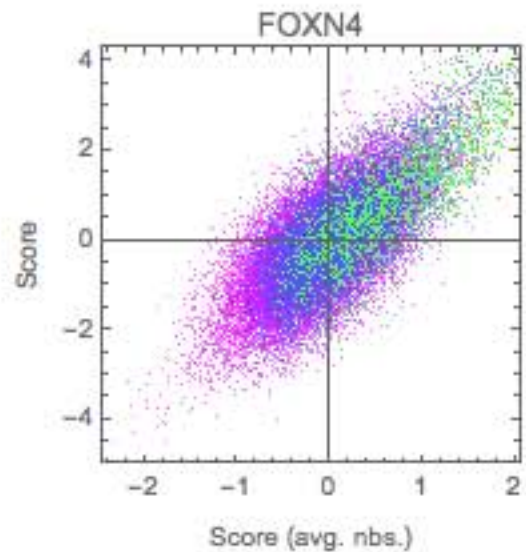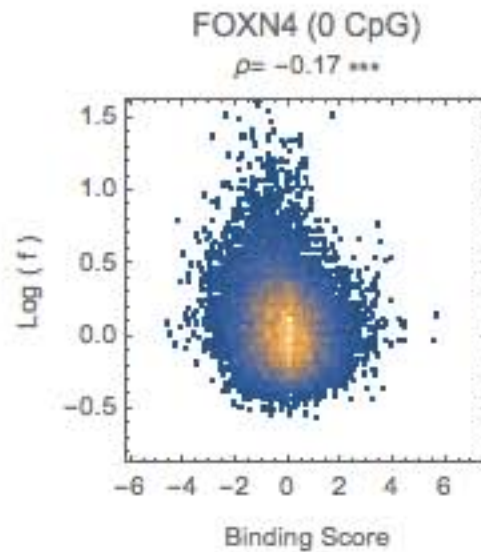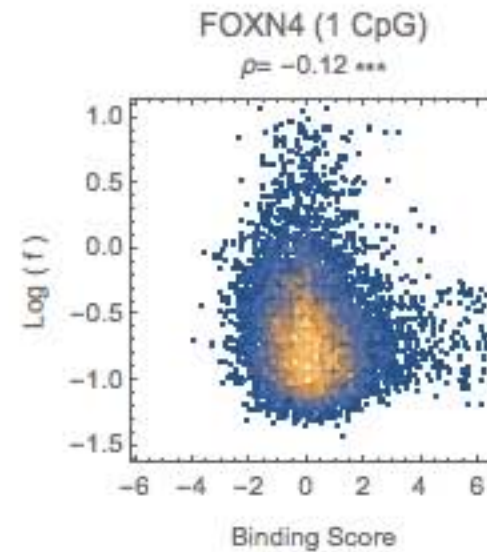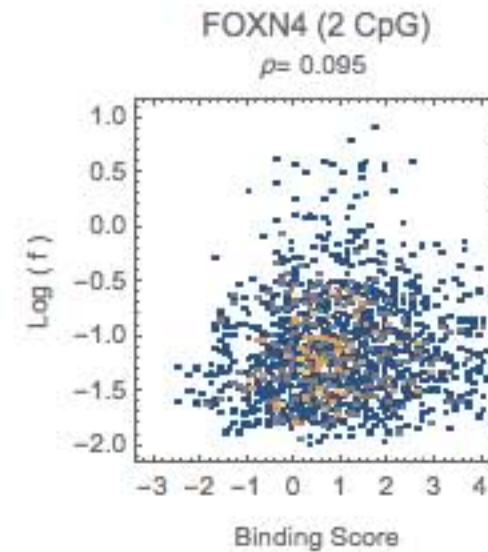

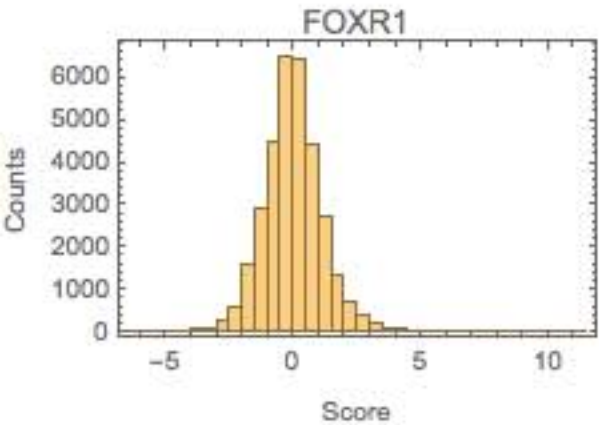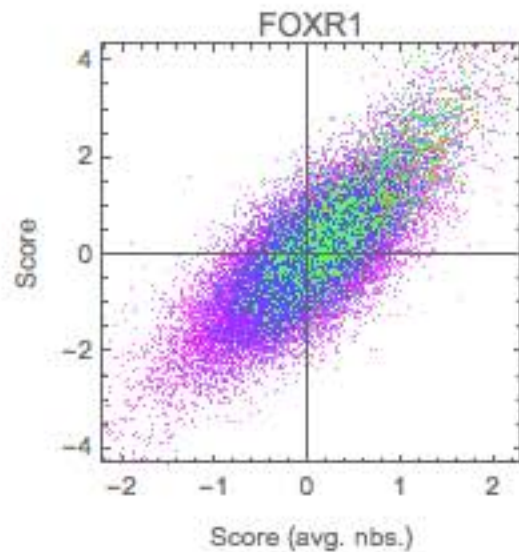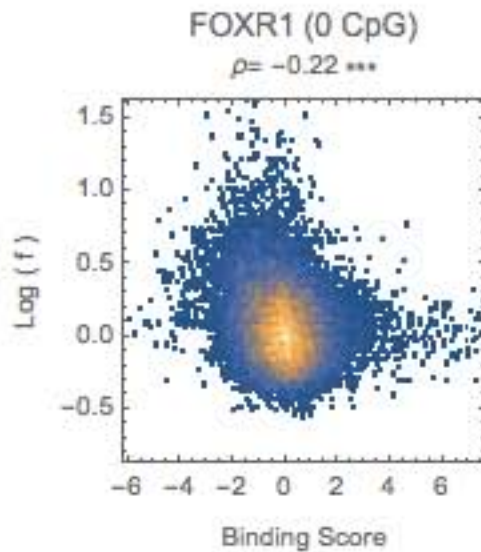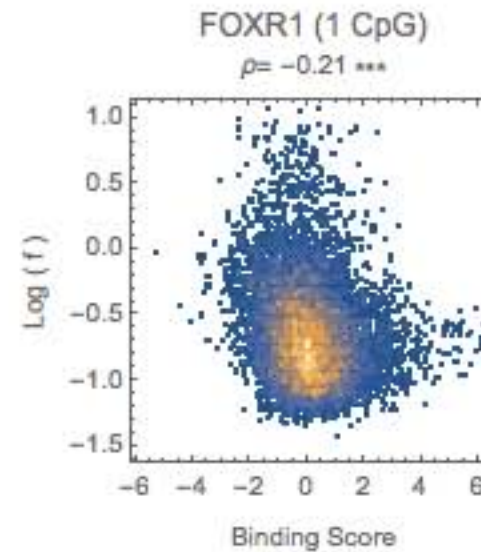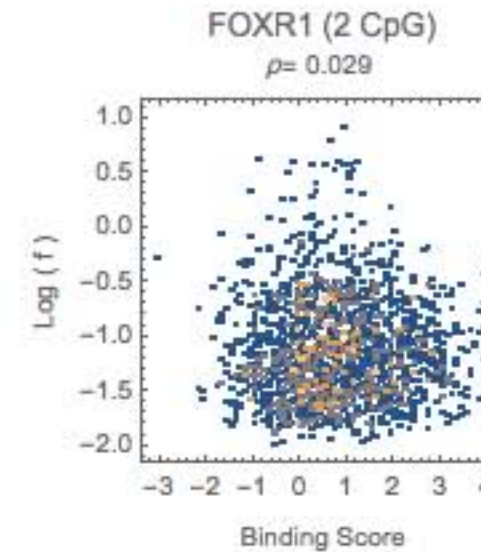

Counts

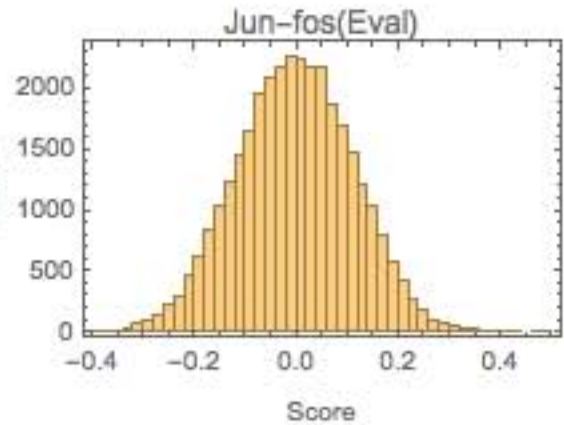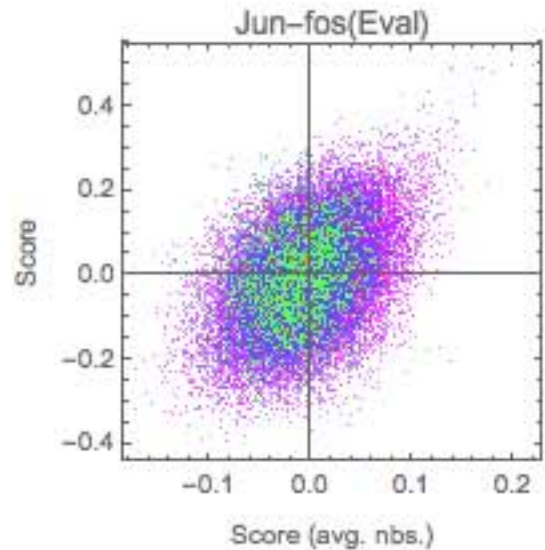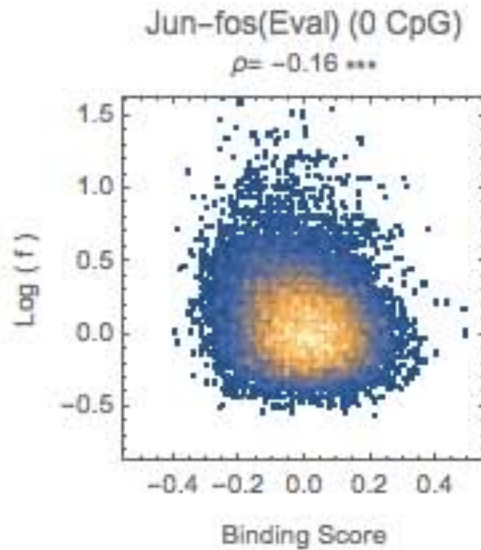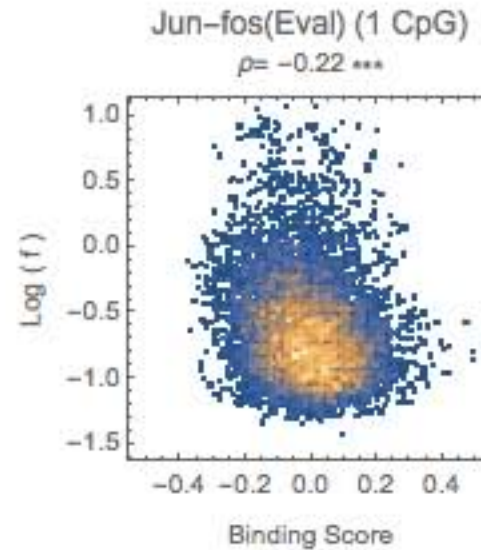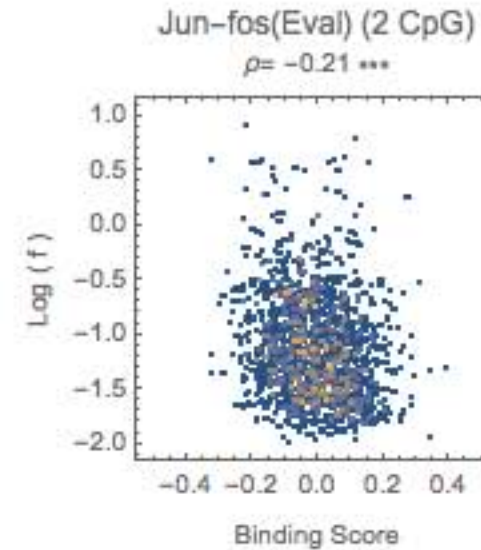



Counts

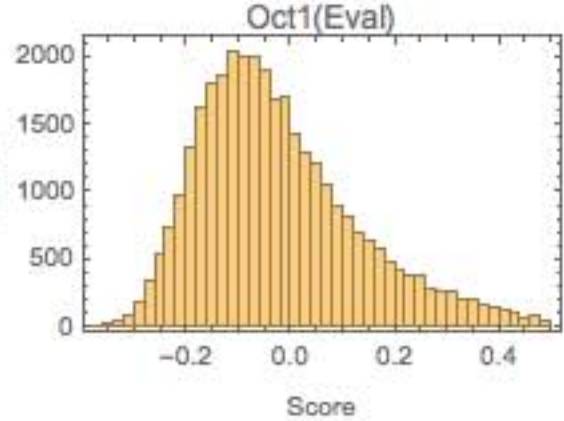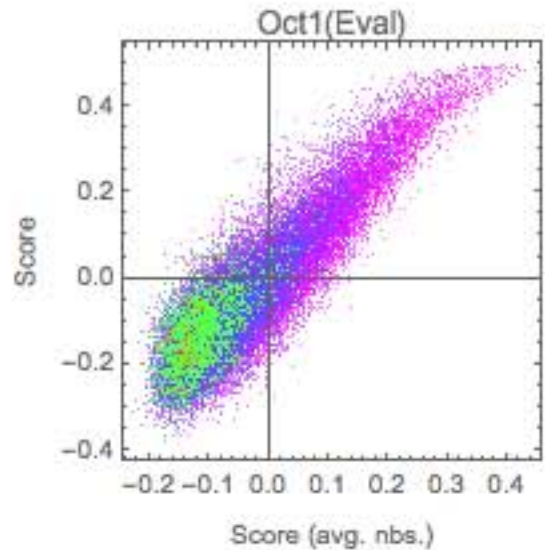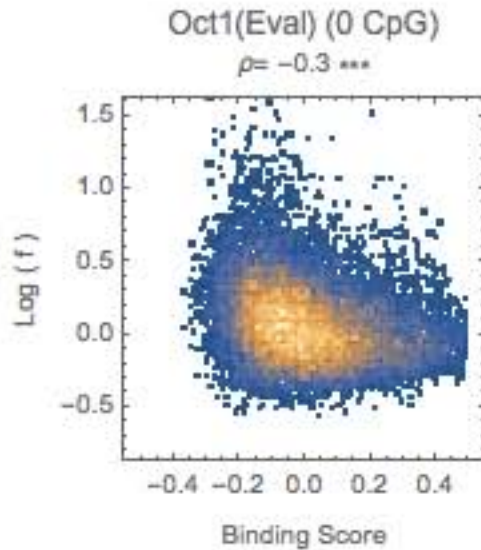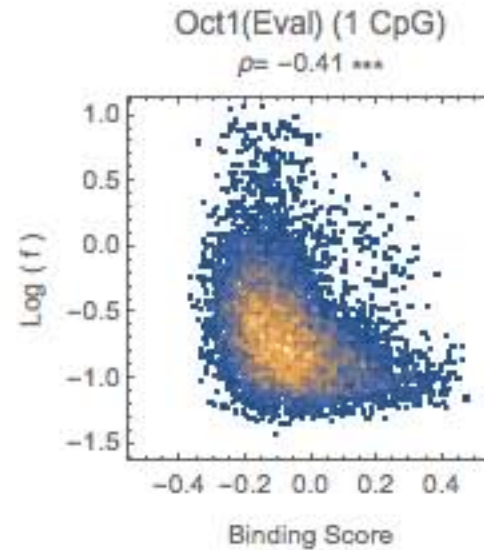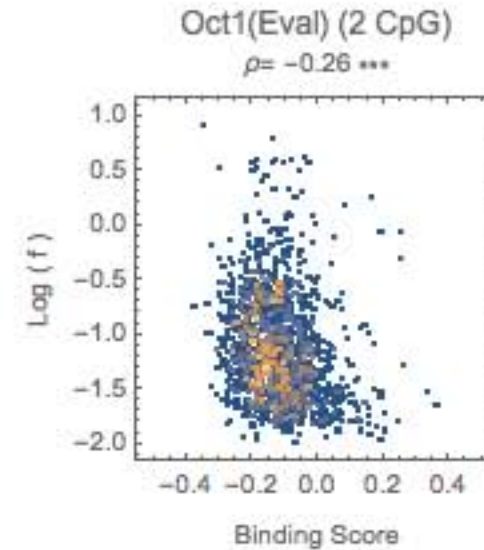

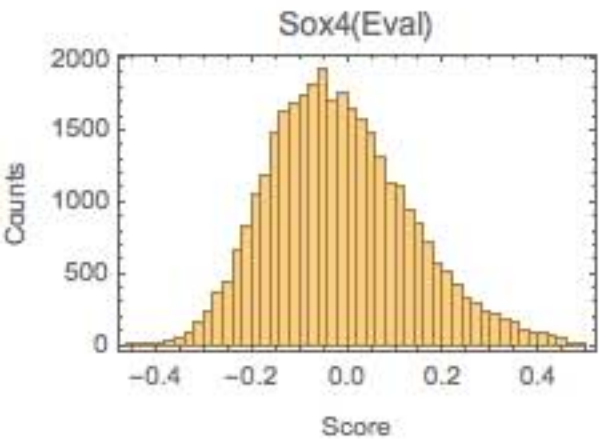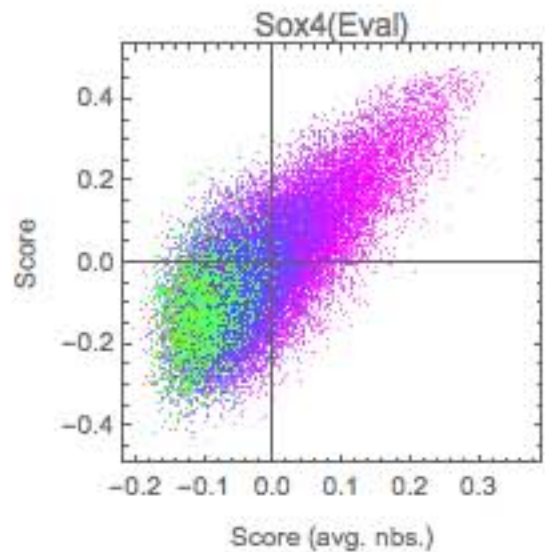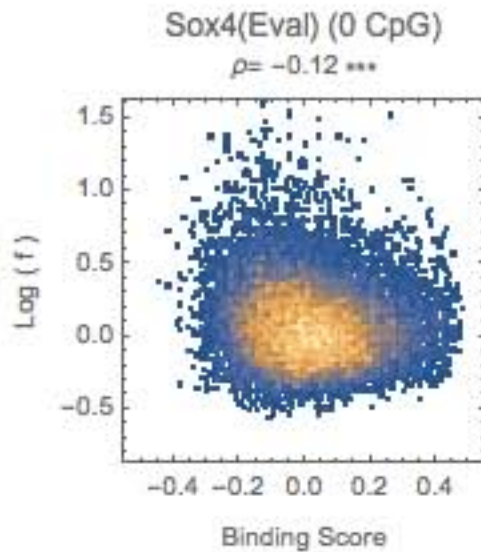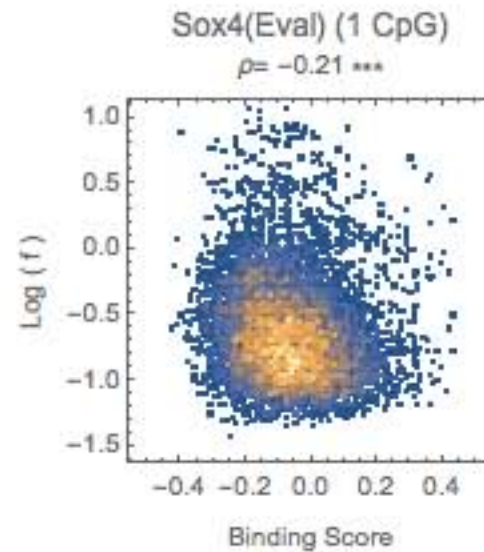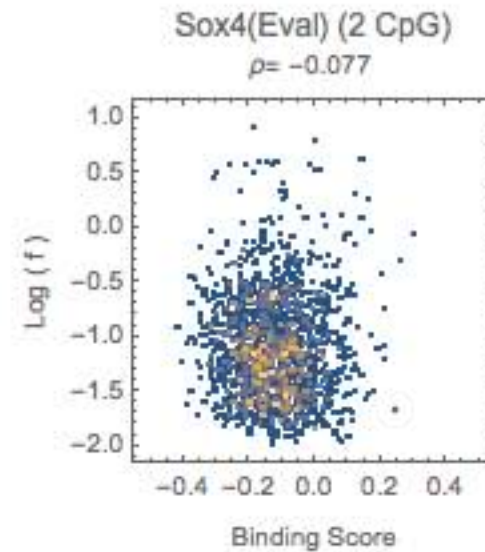

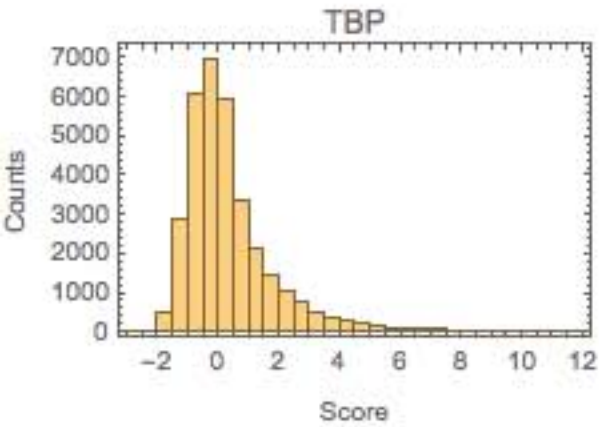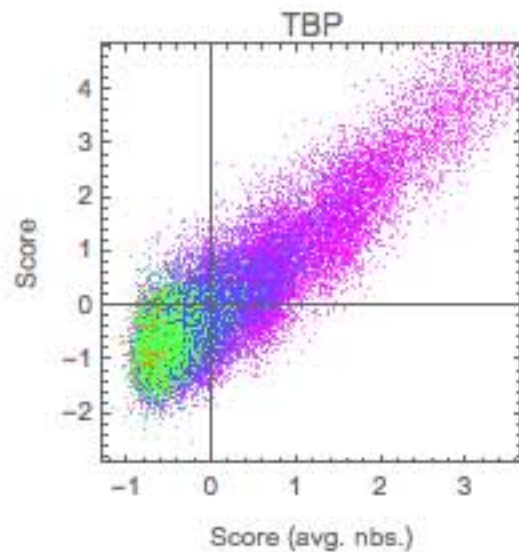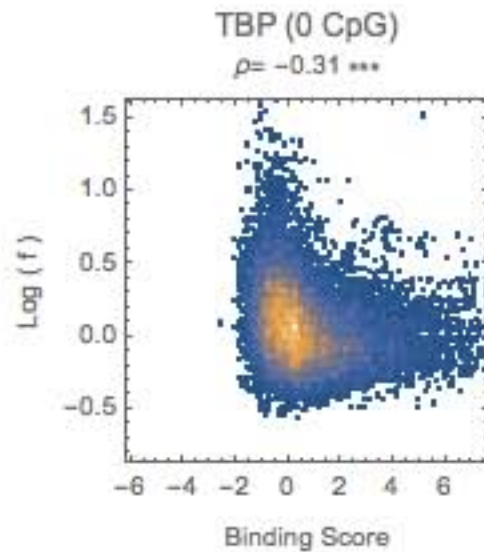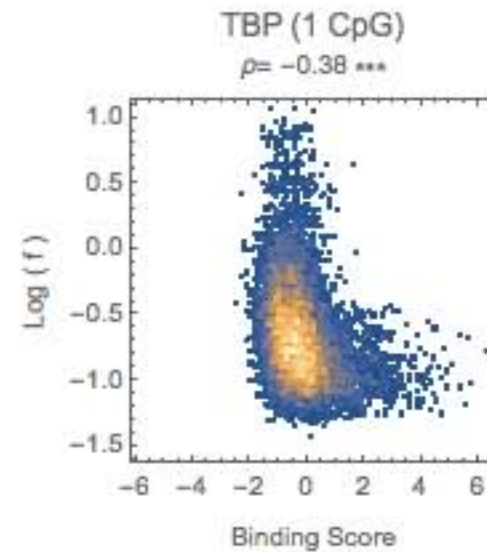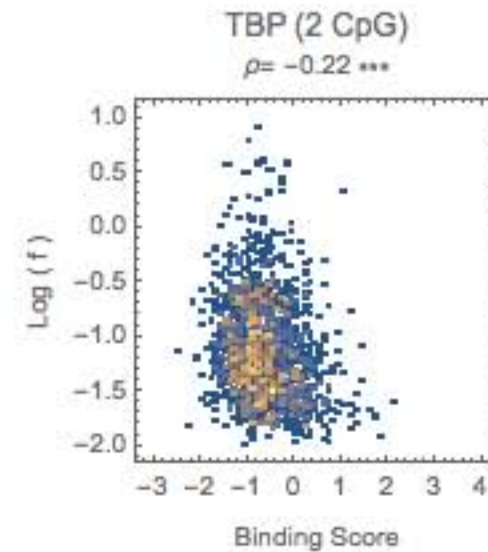

*S. cerevisiae*



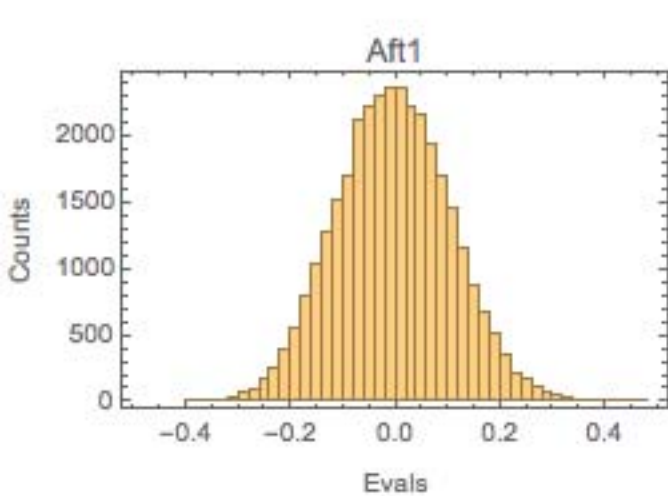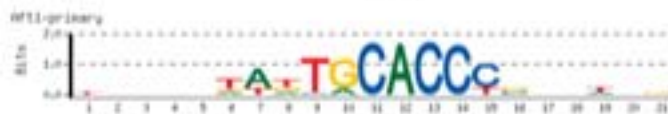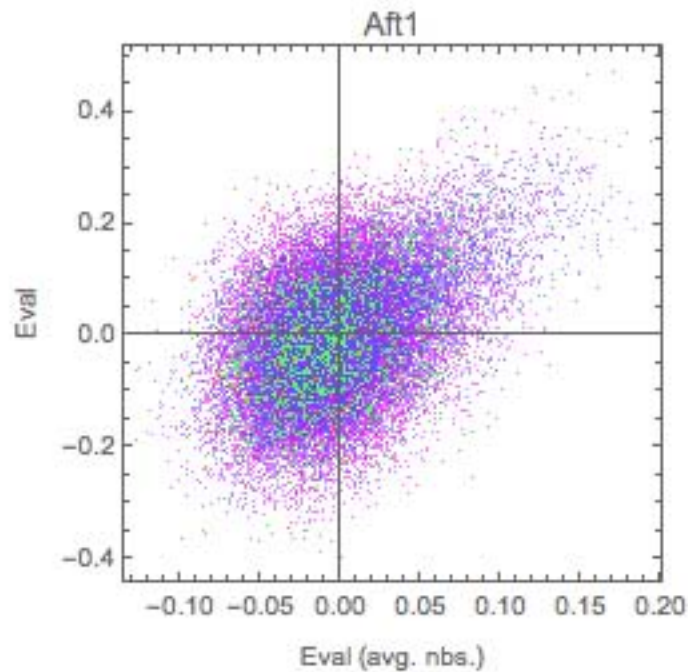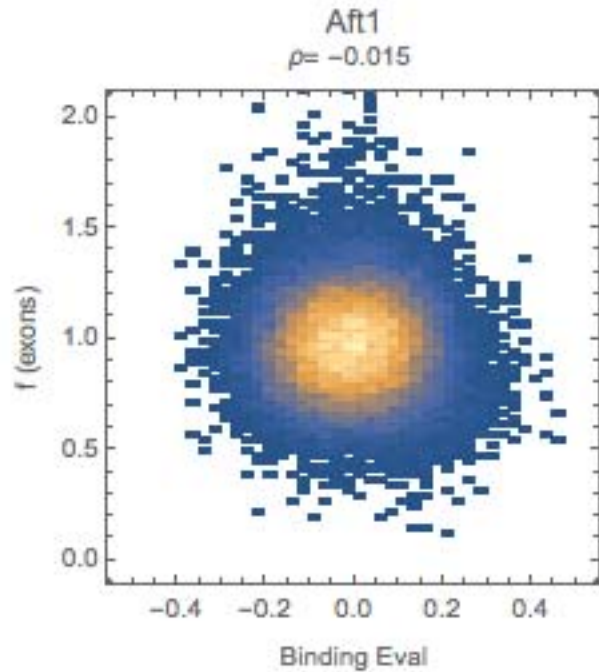

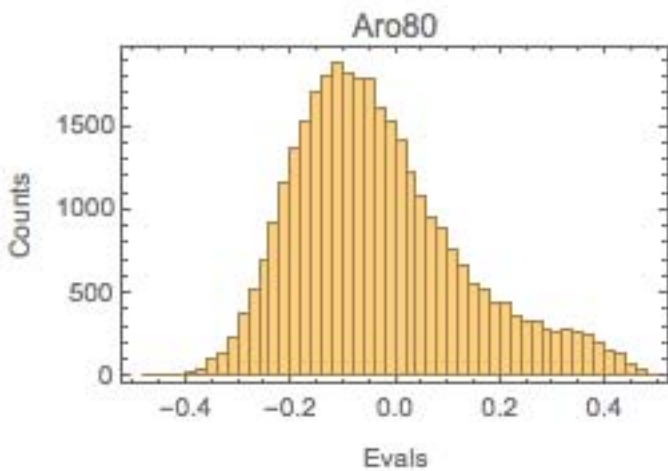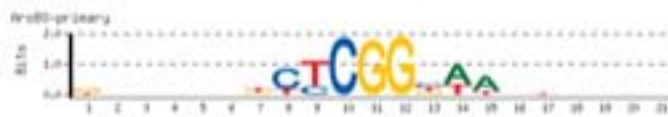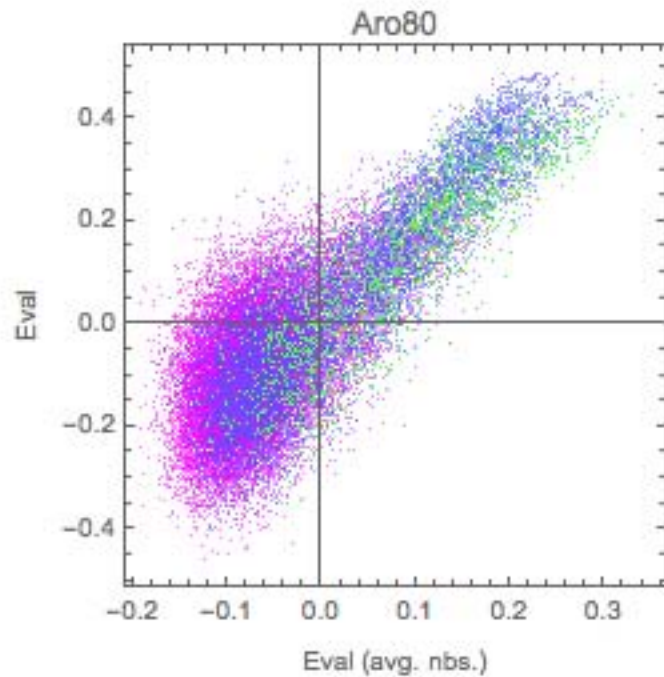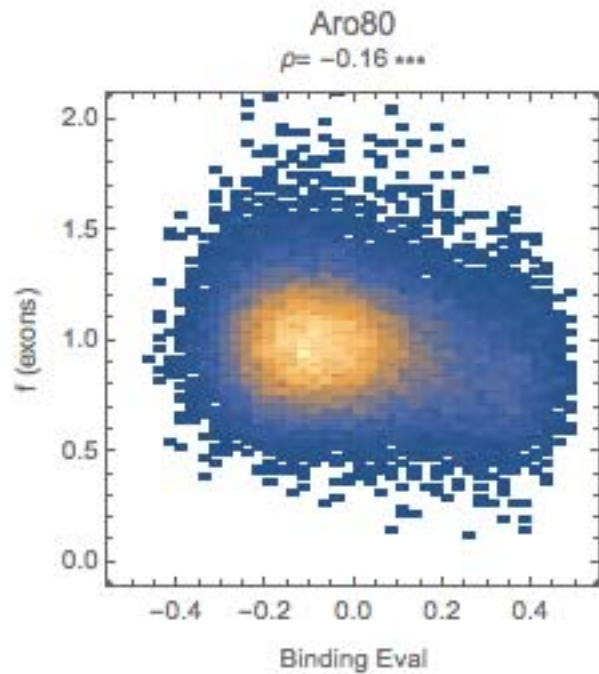

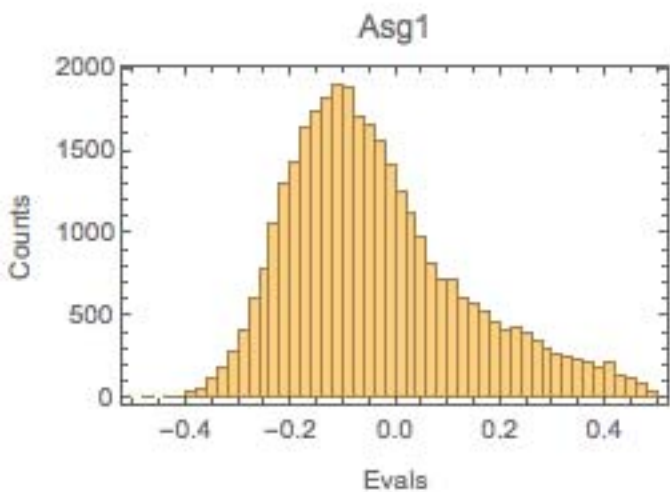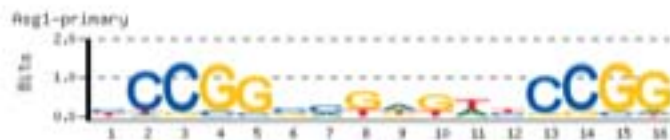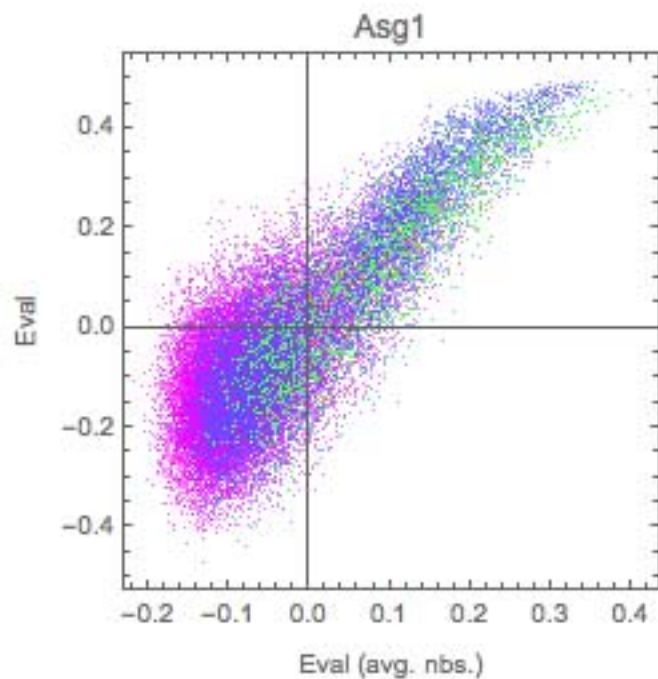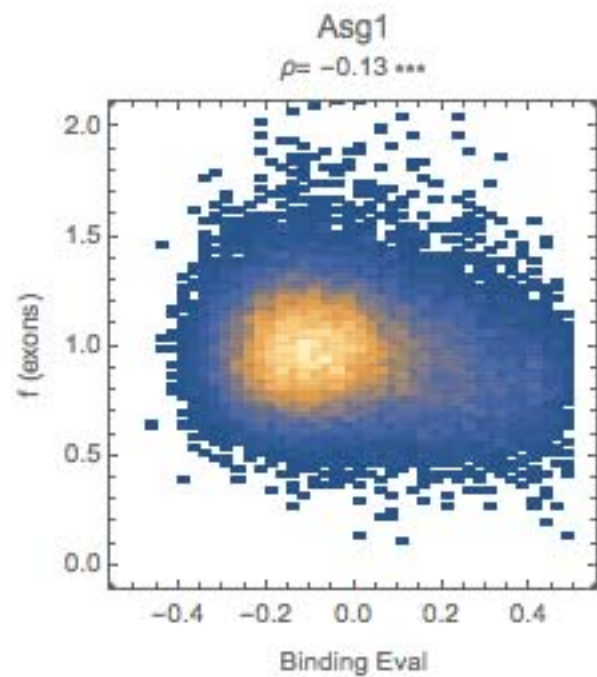

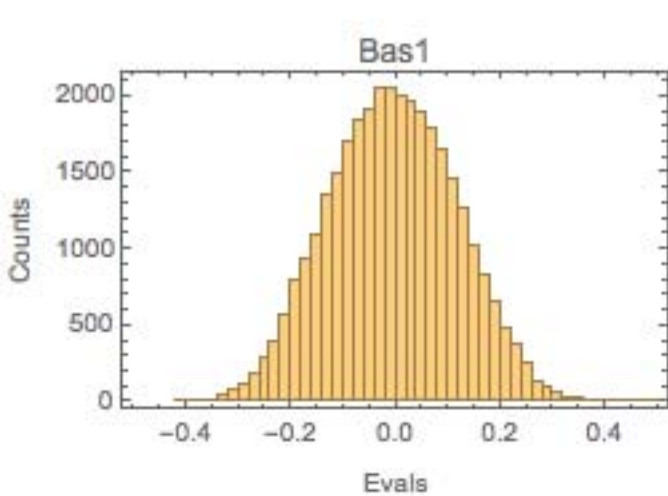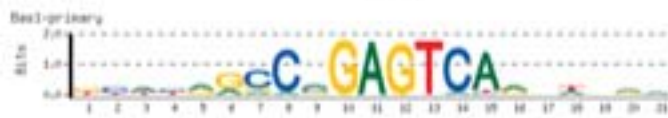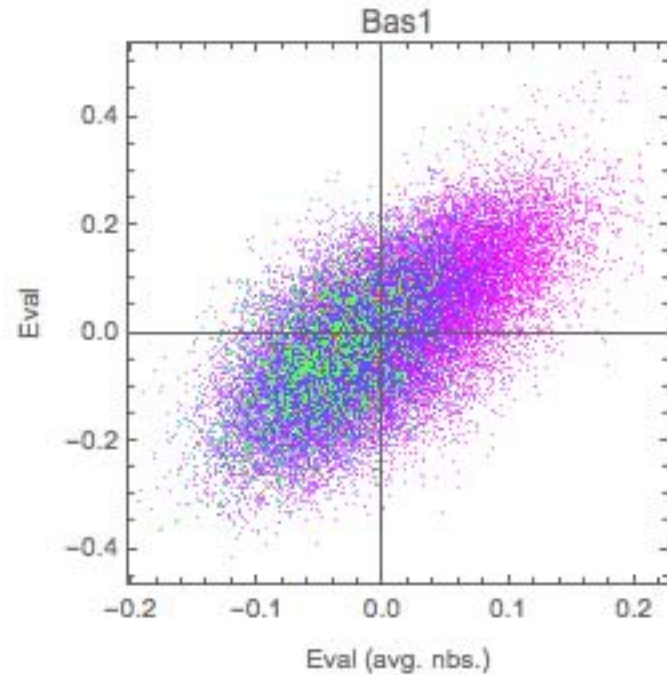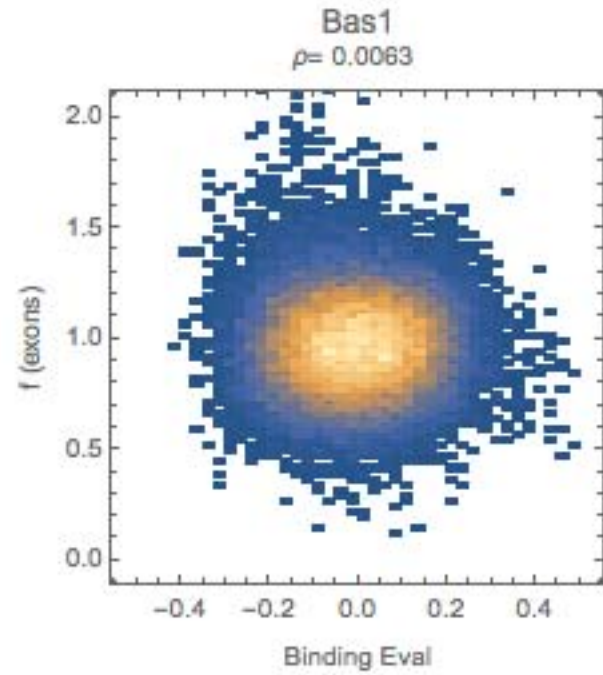



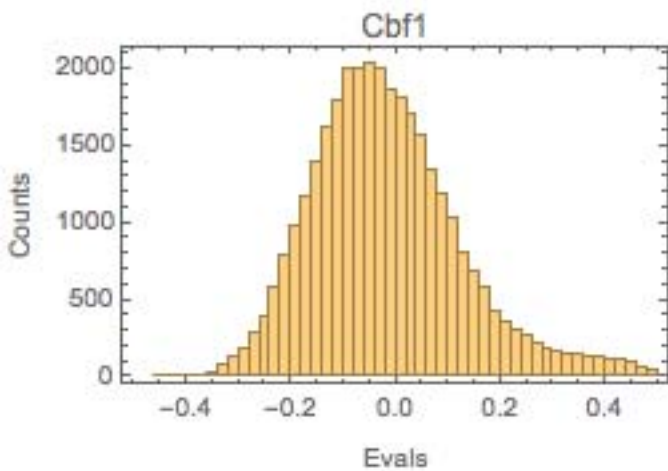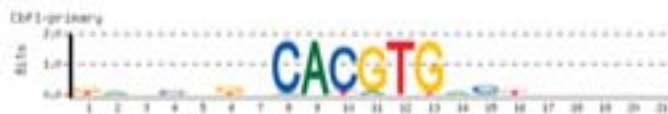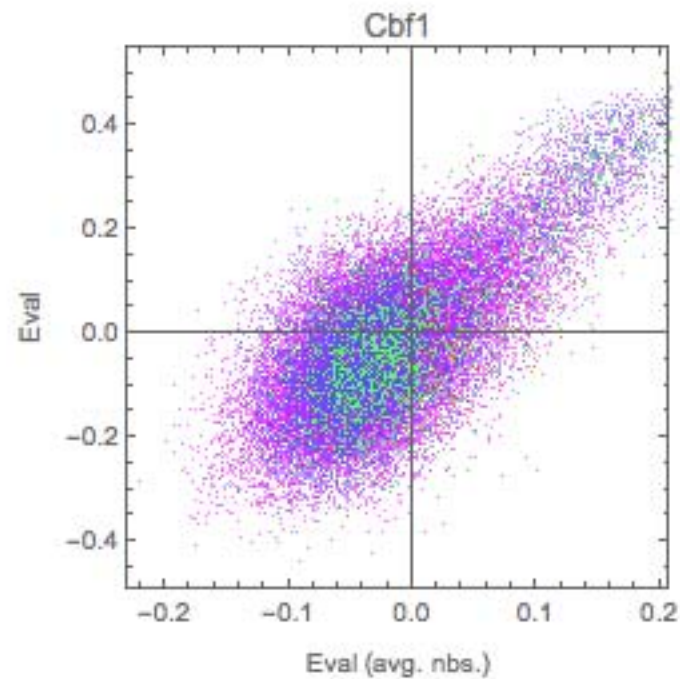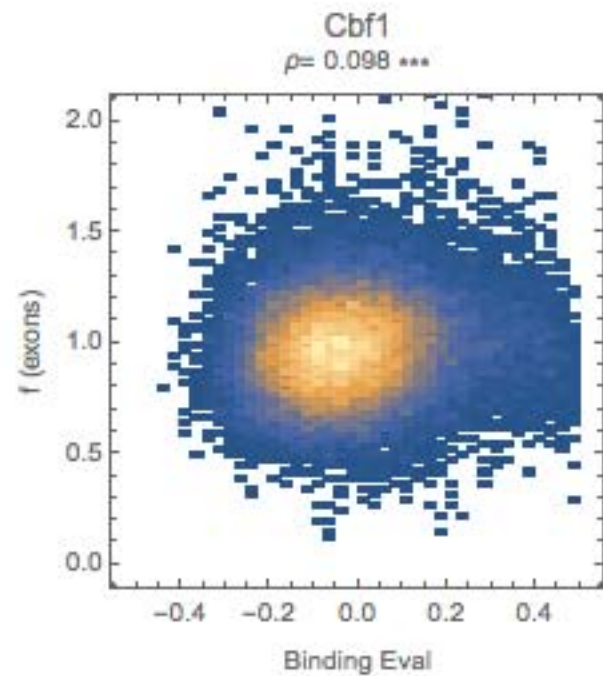

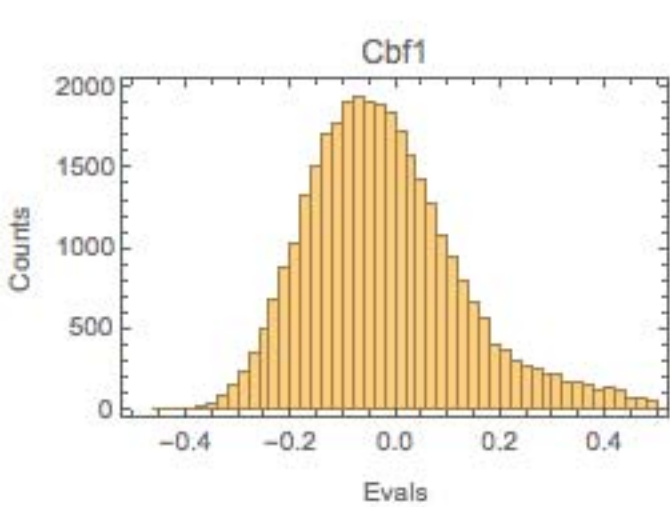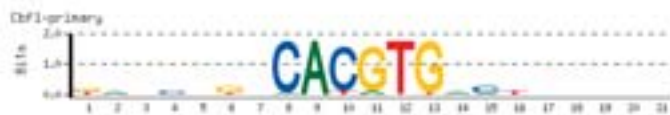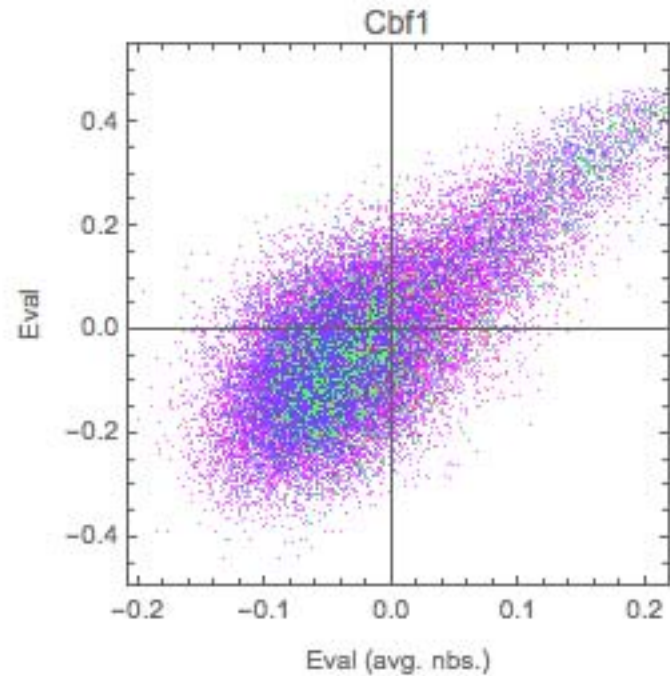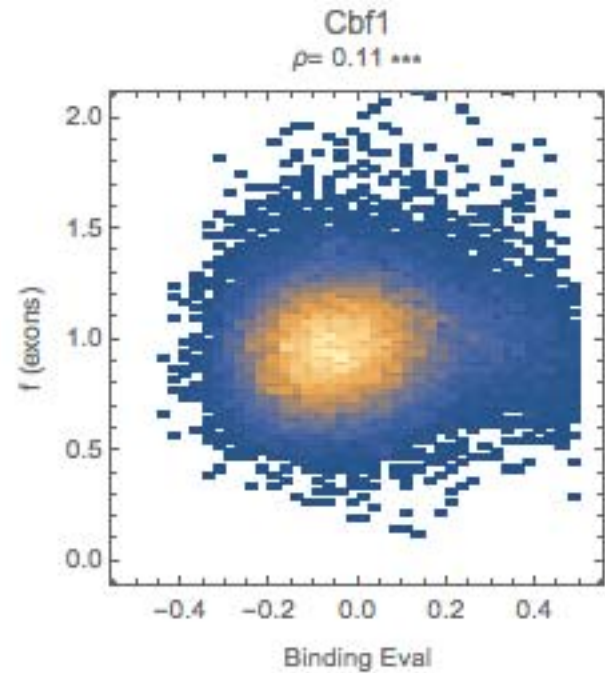

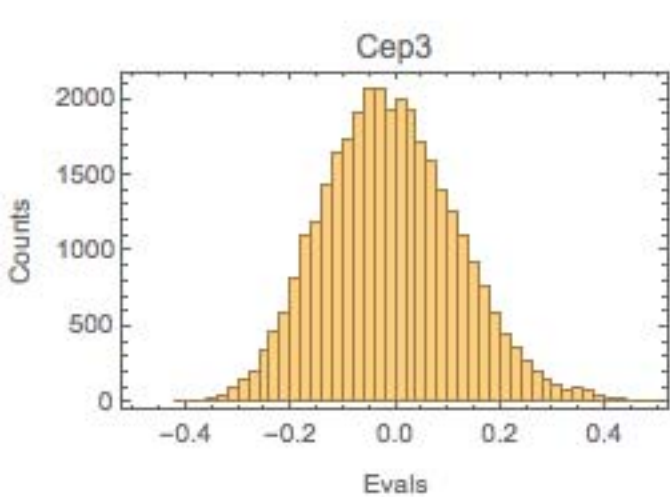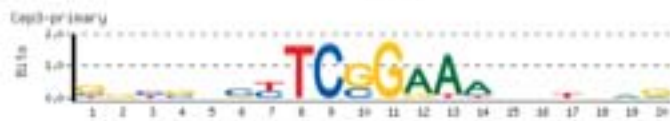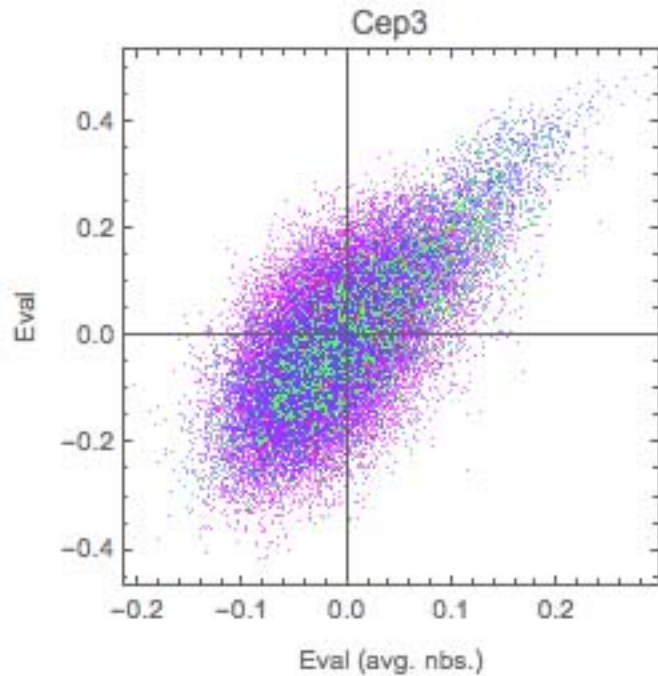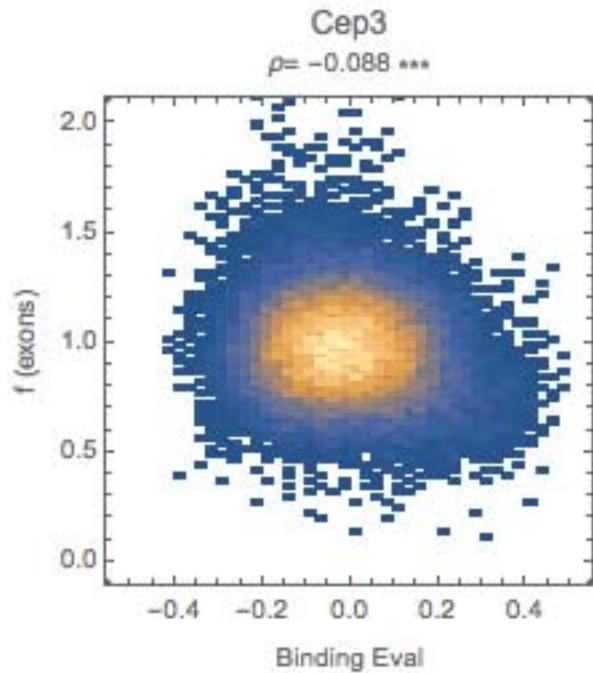

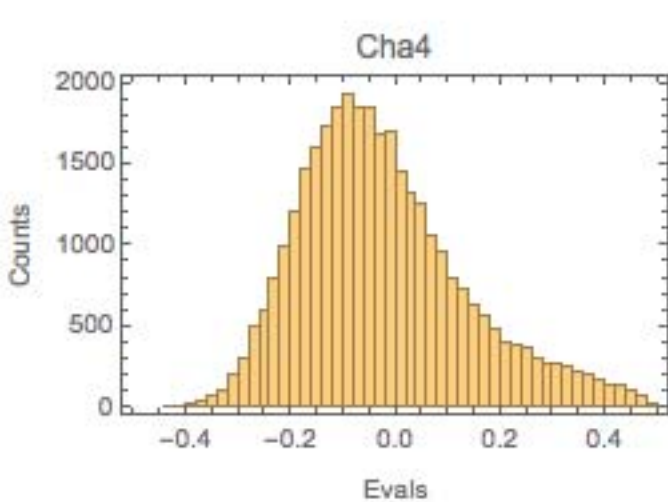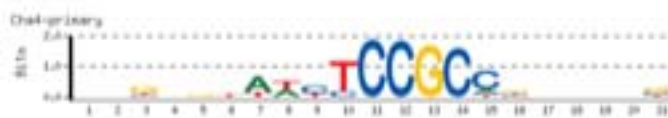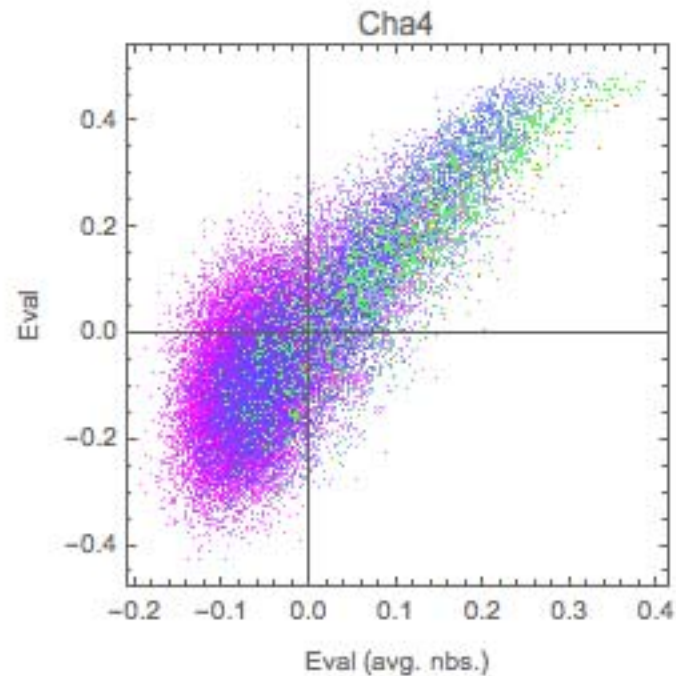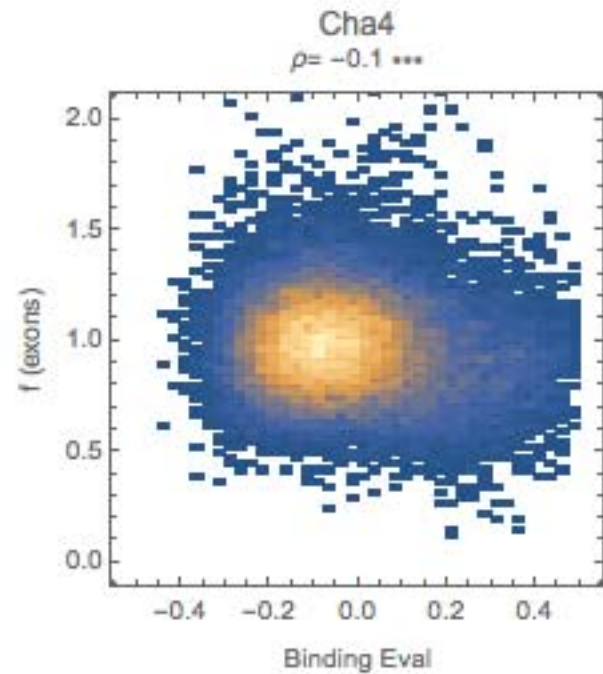



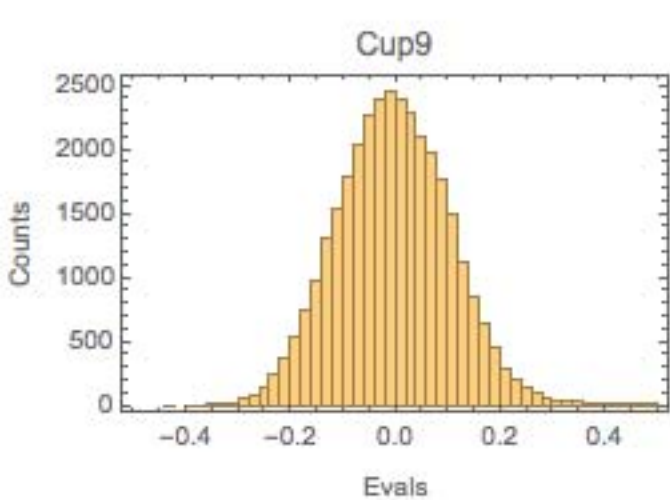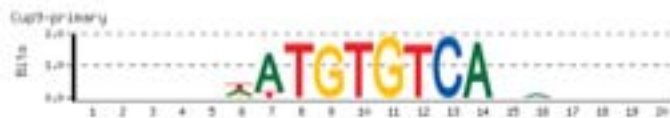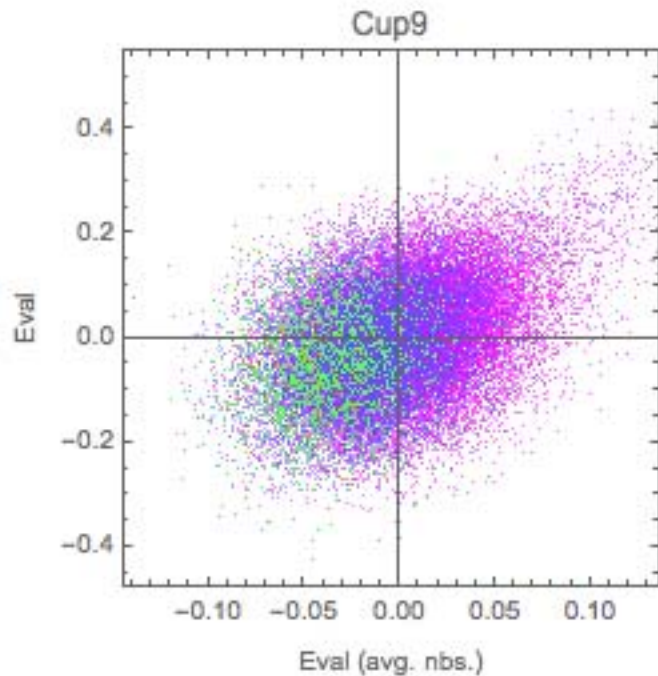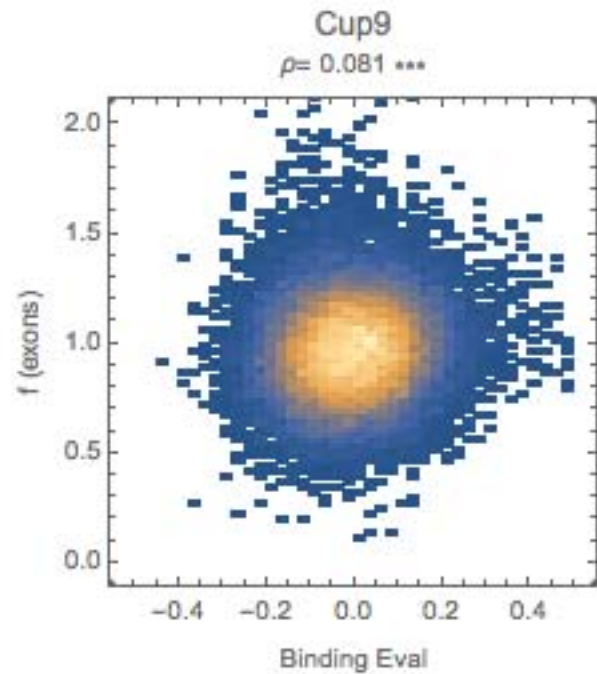

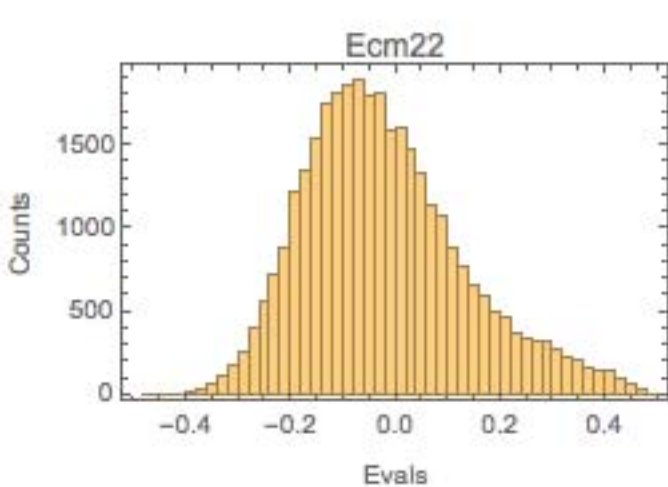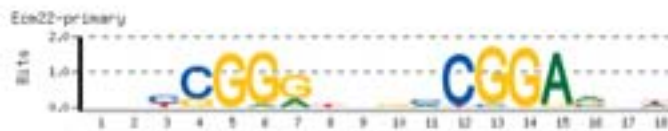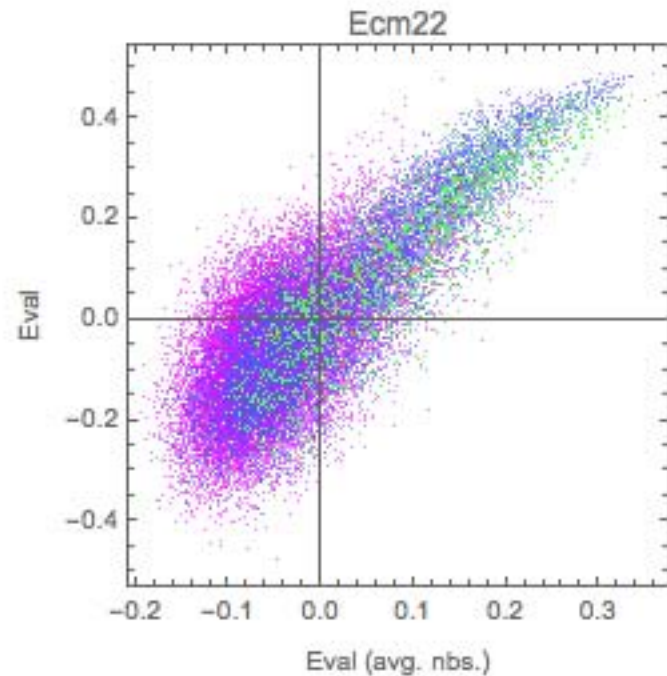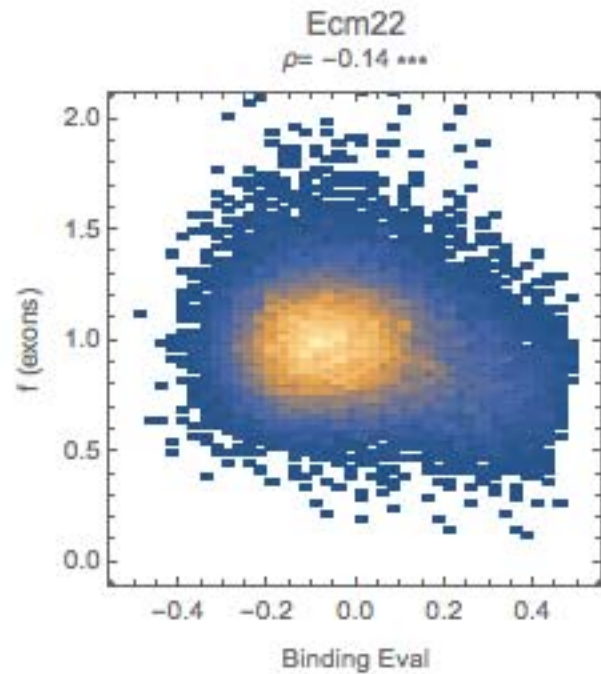

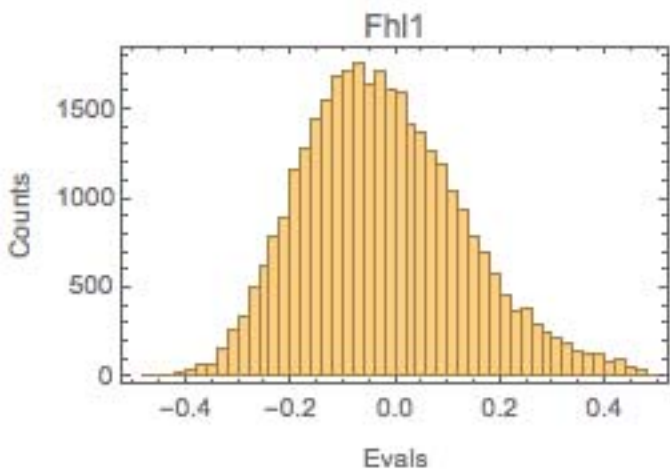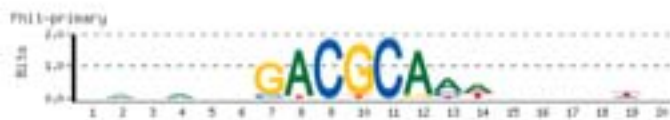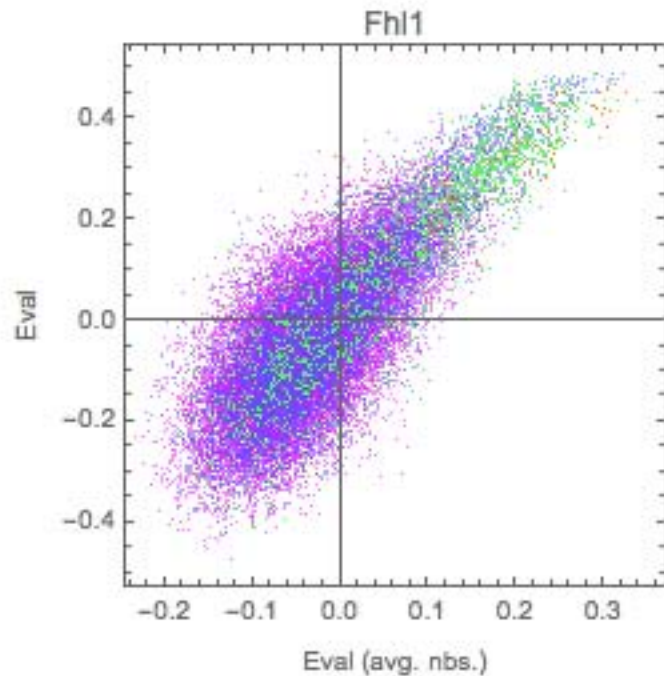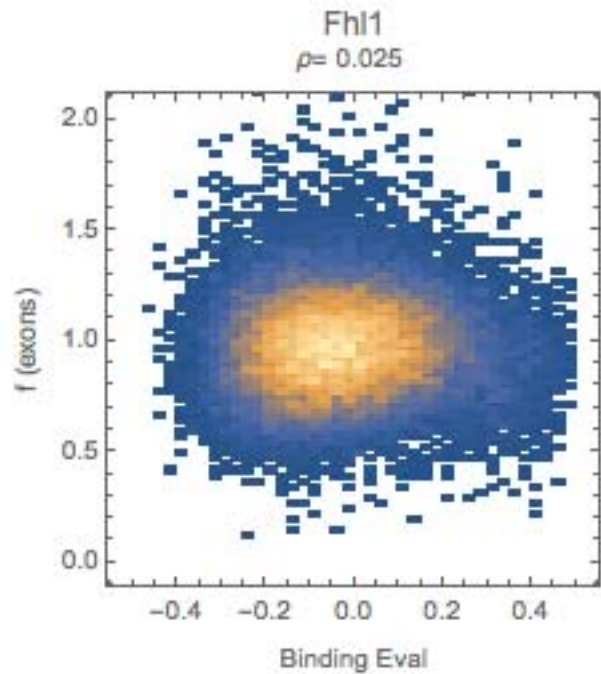

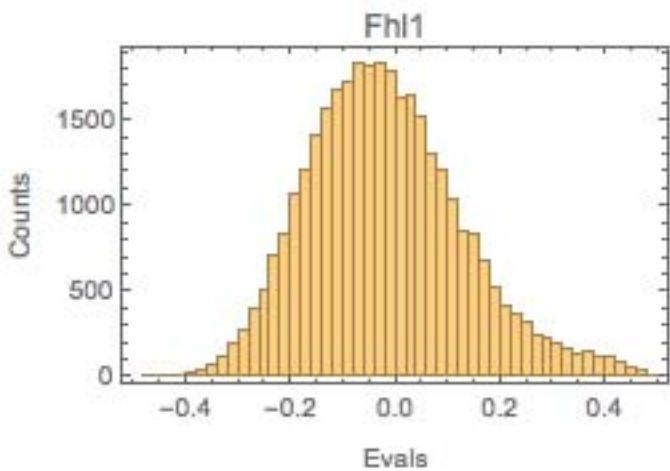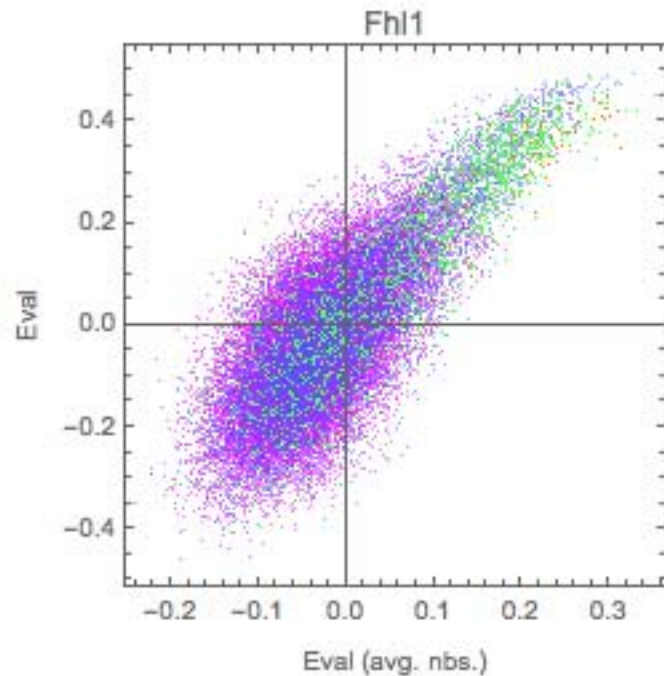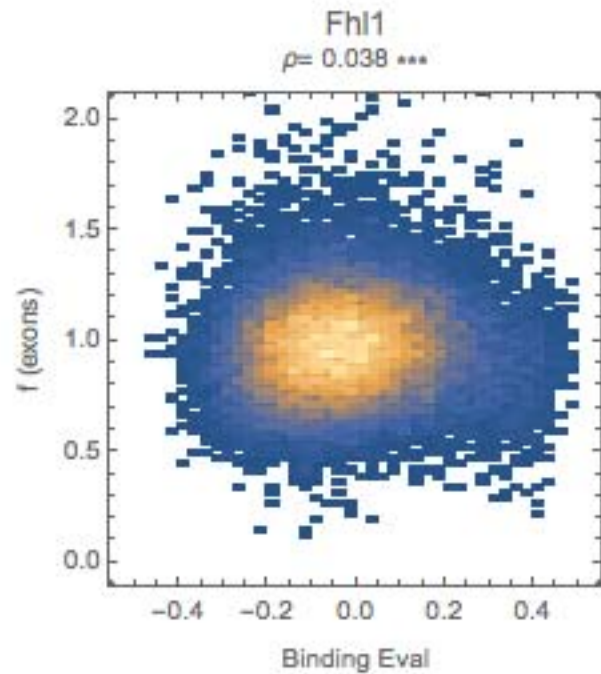



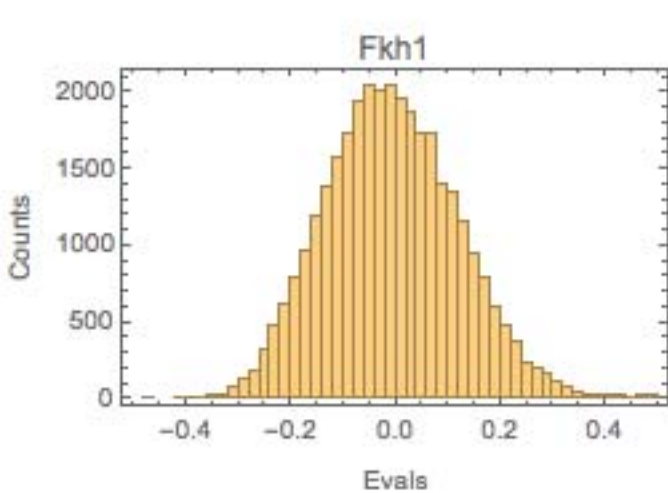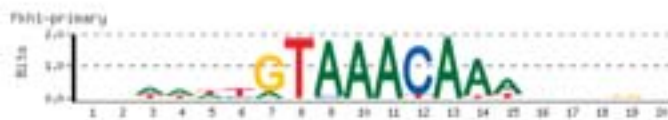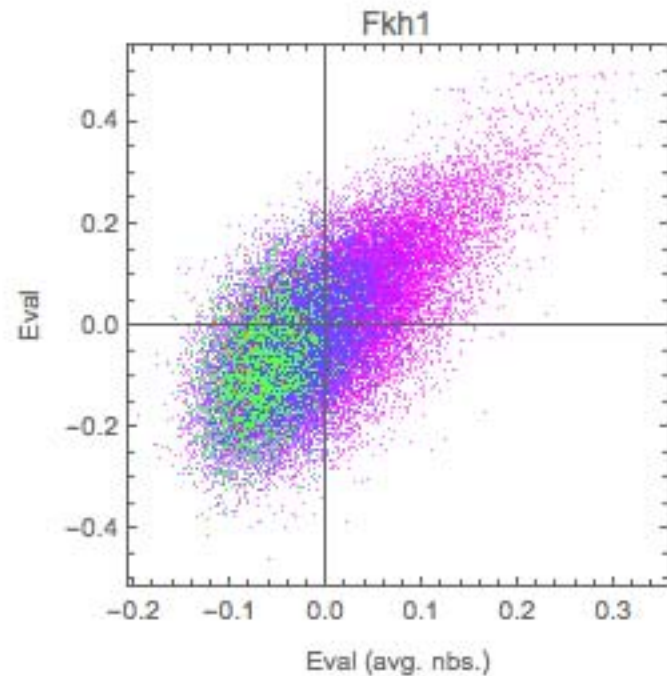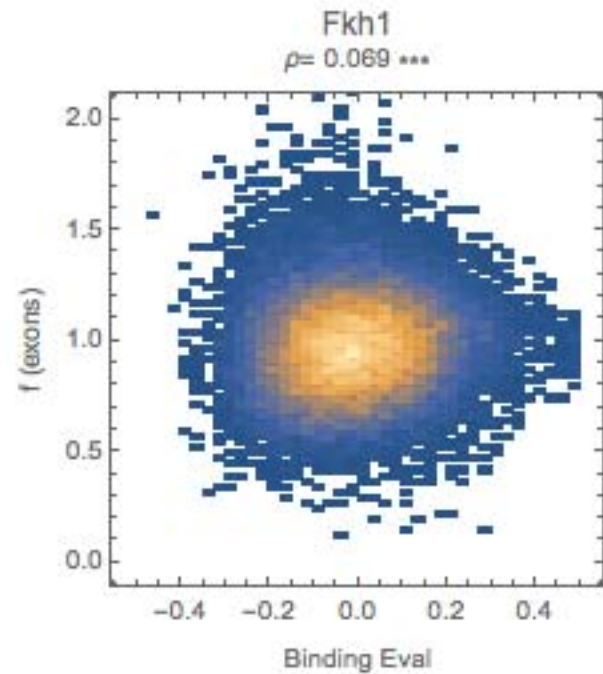

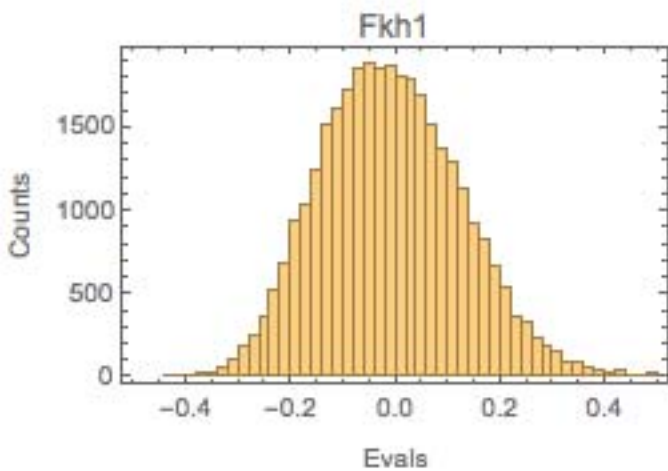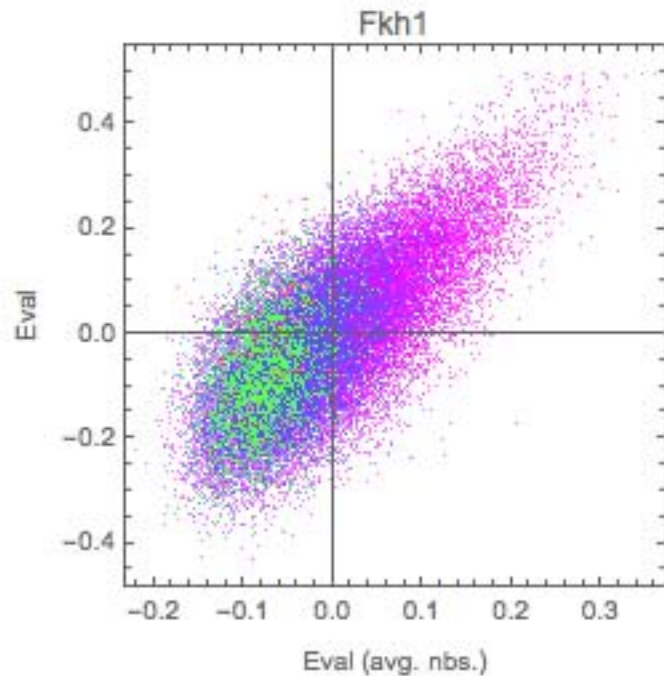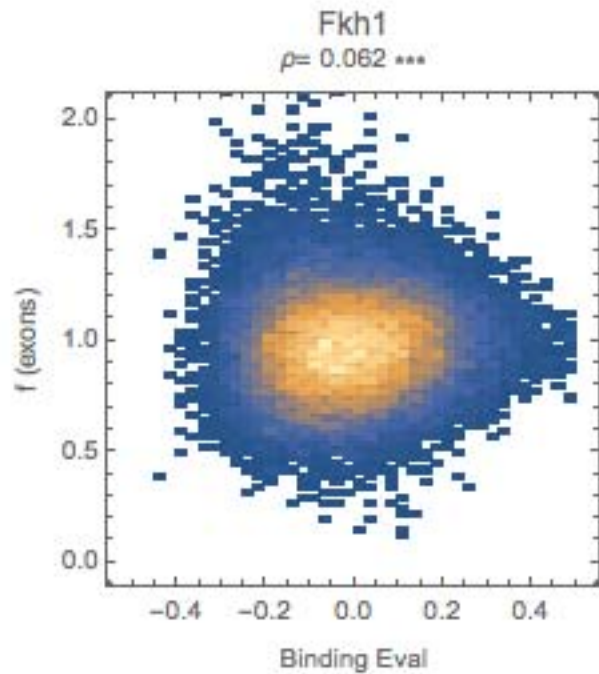

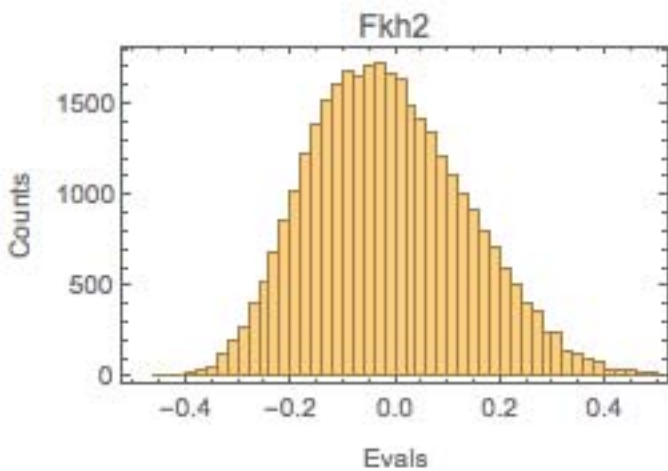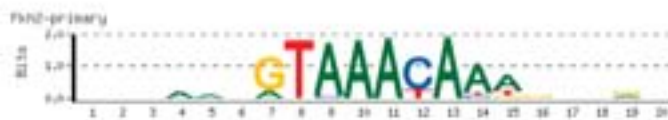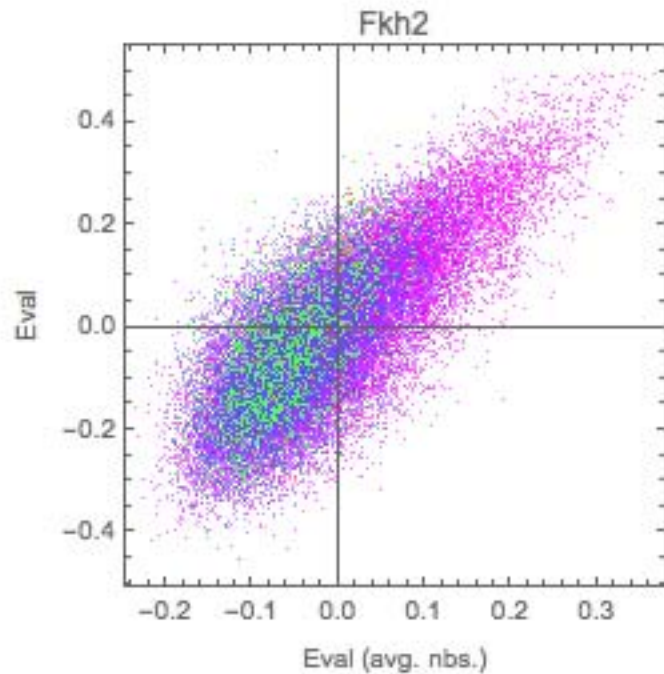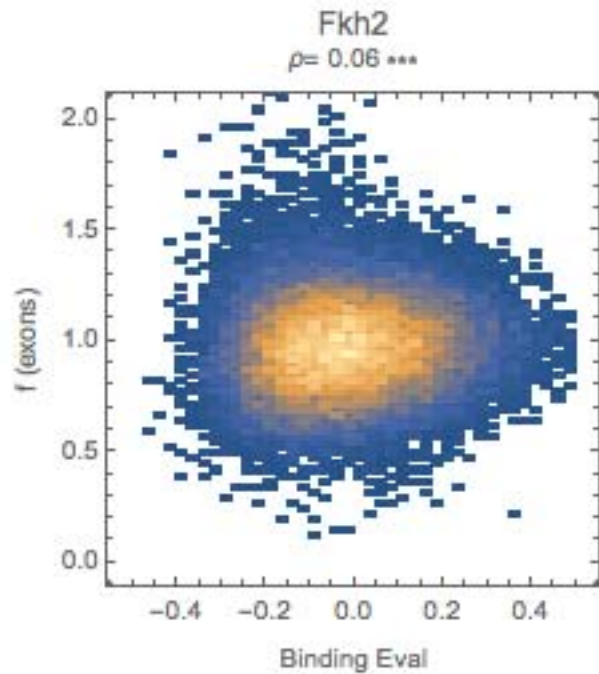

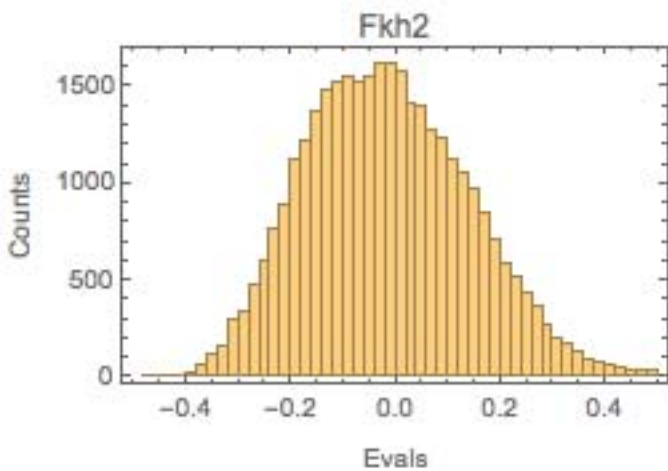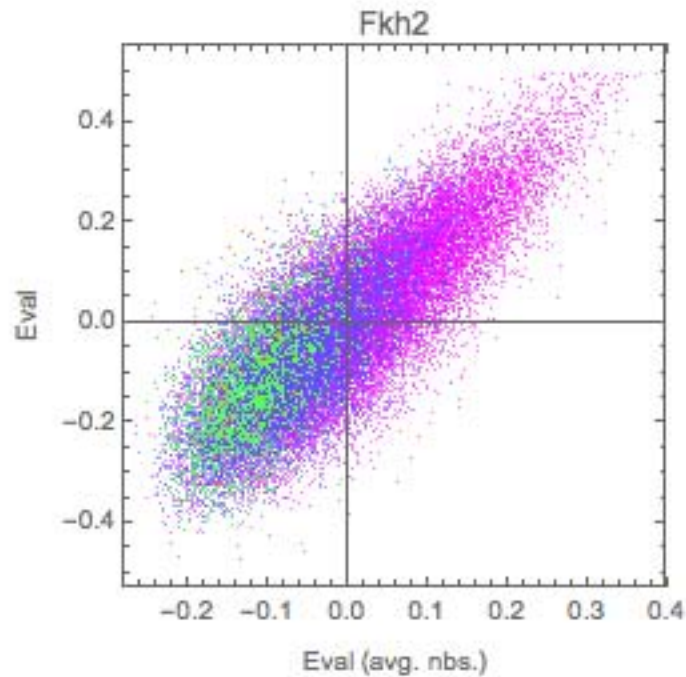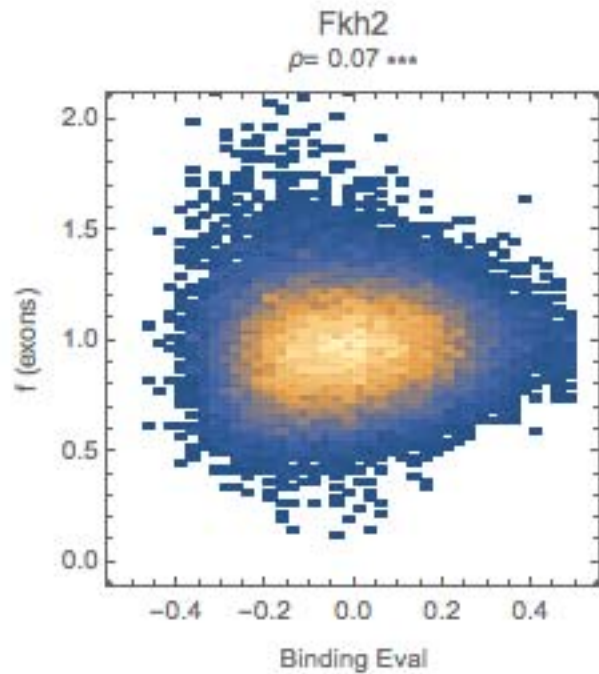



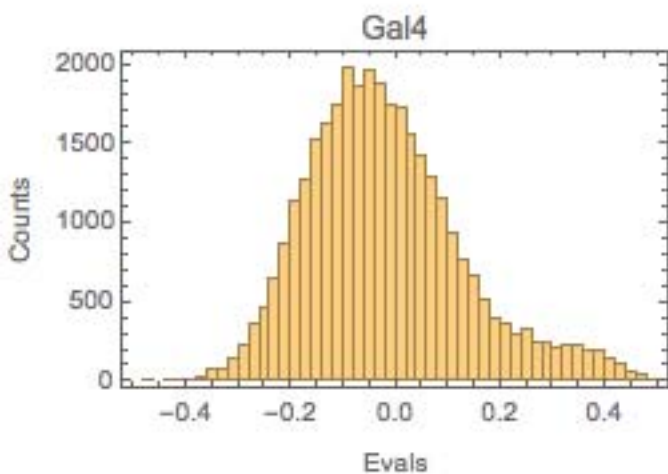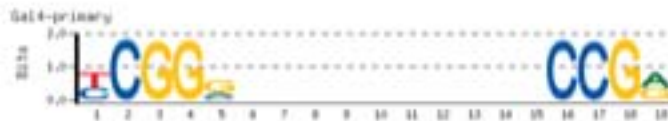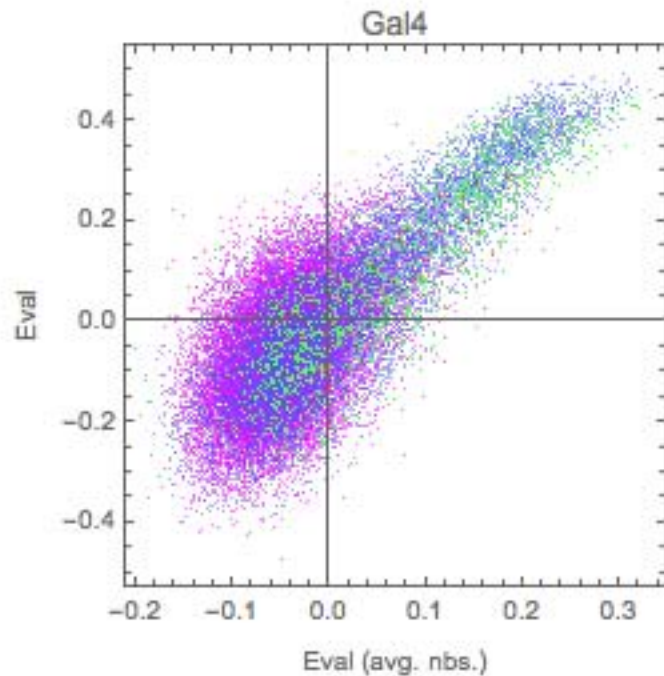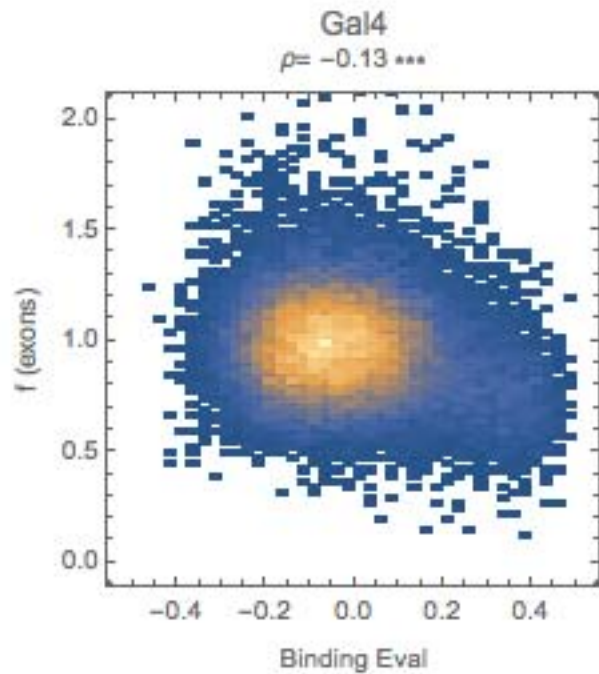

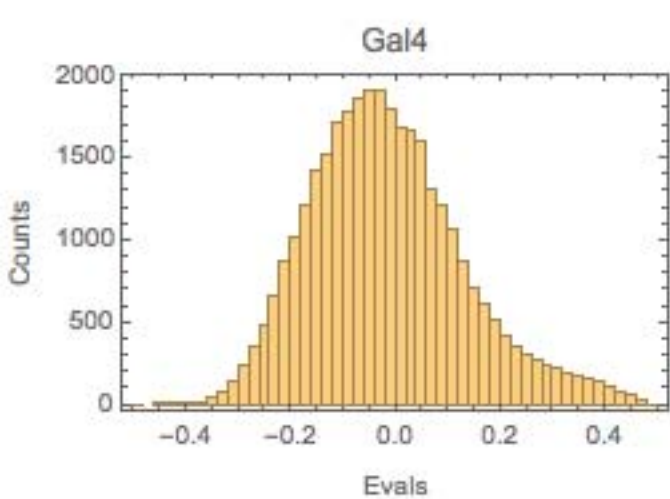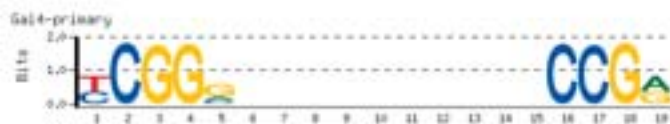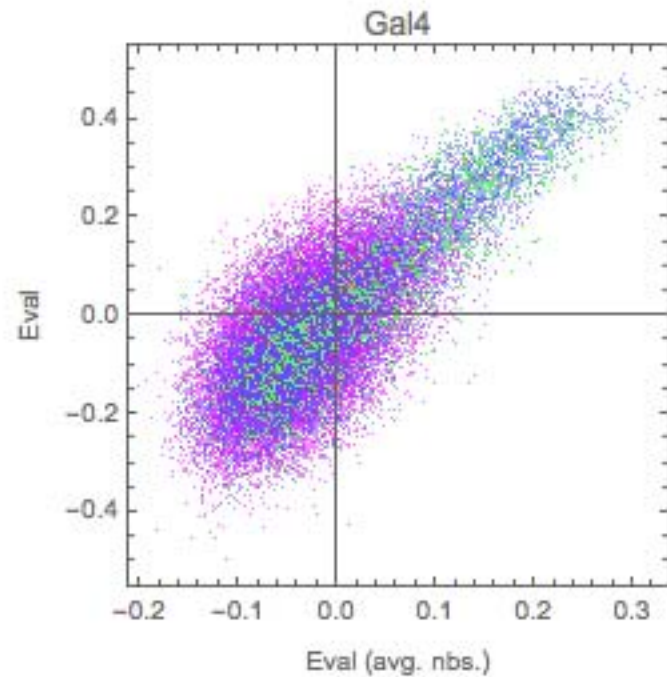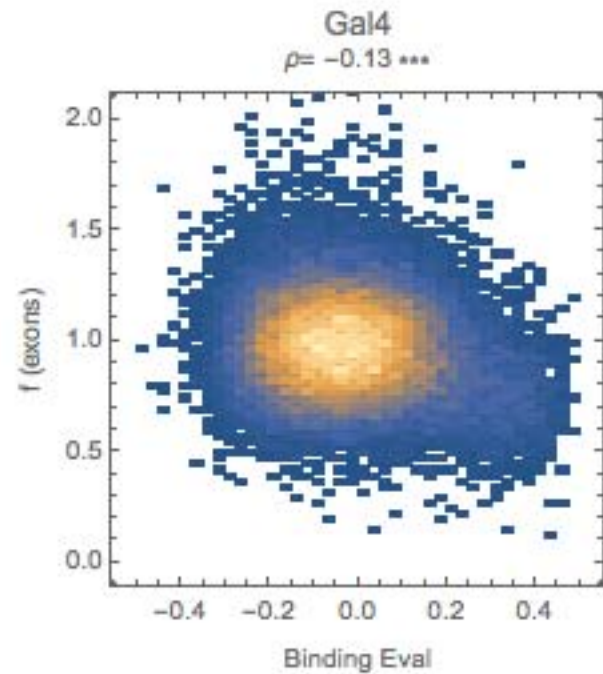

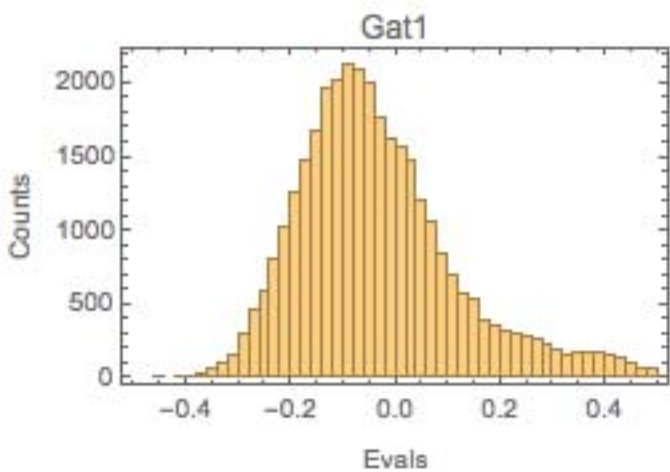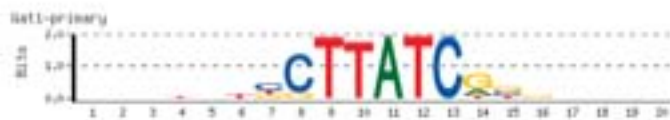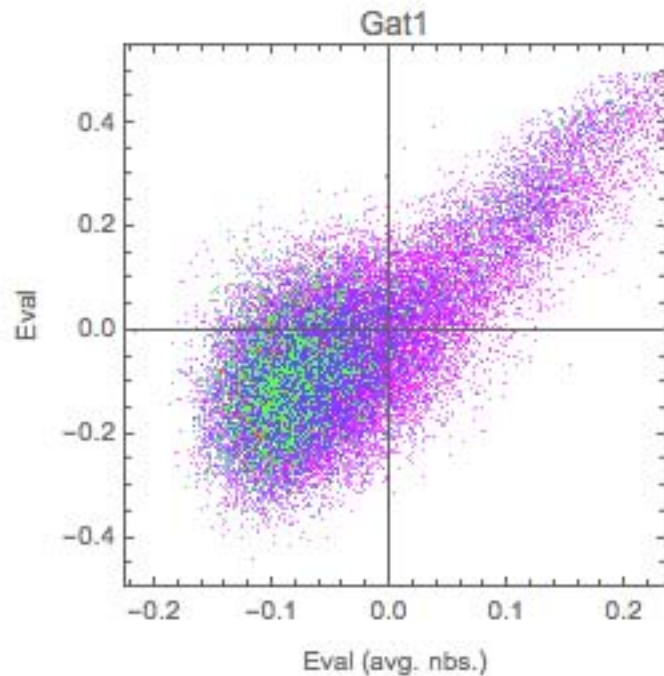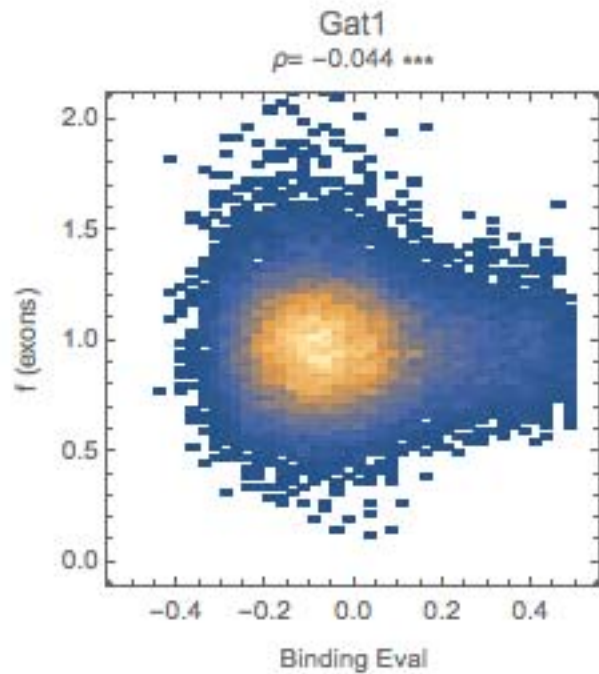

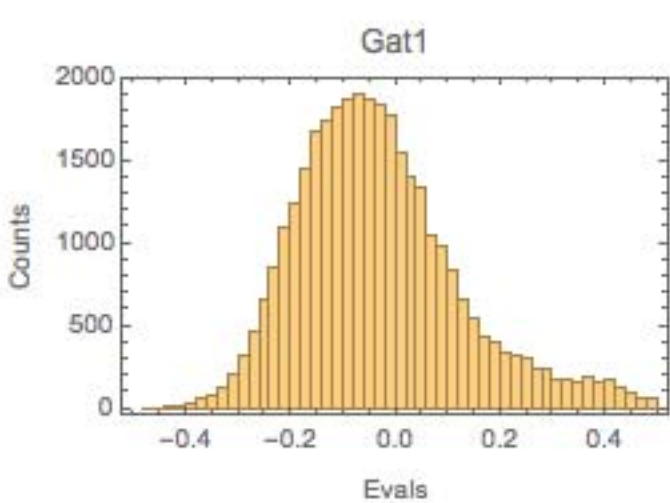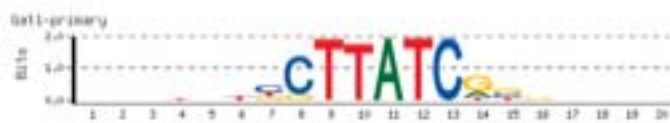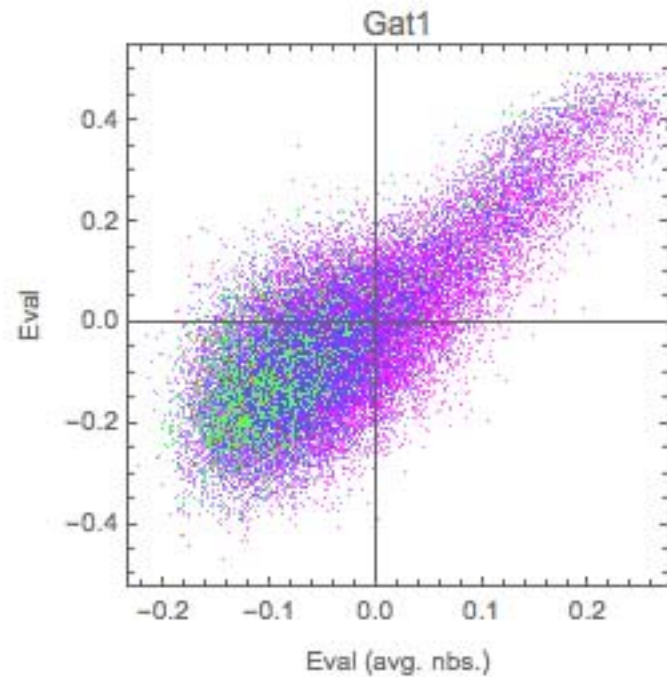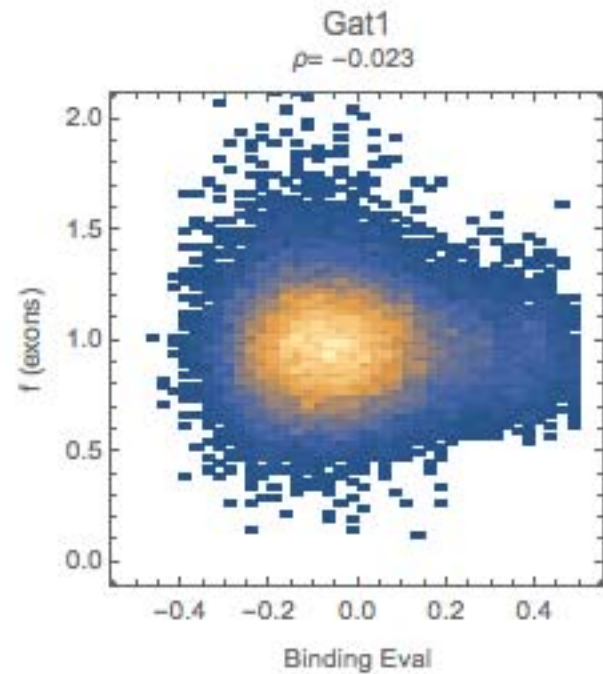



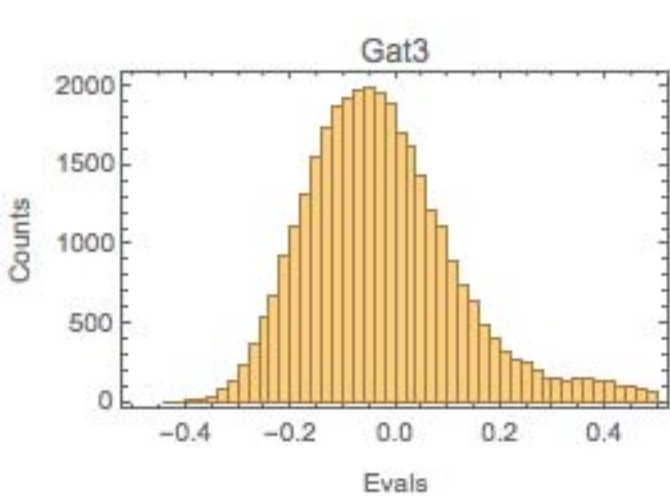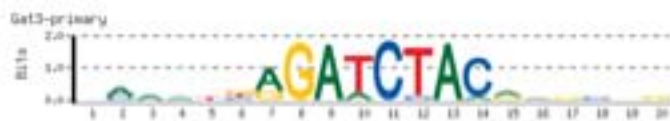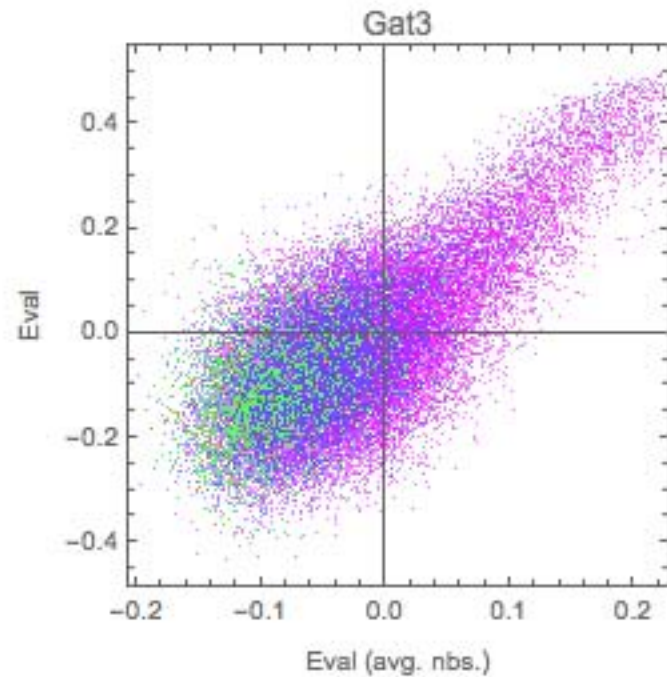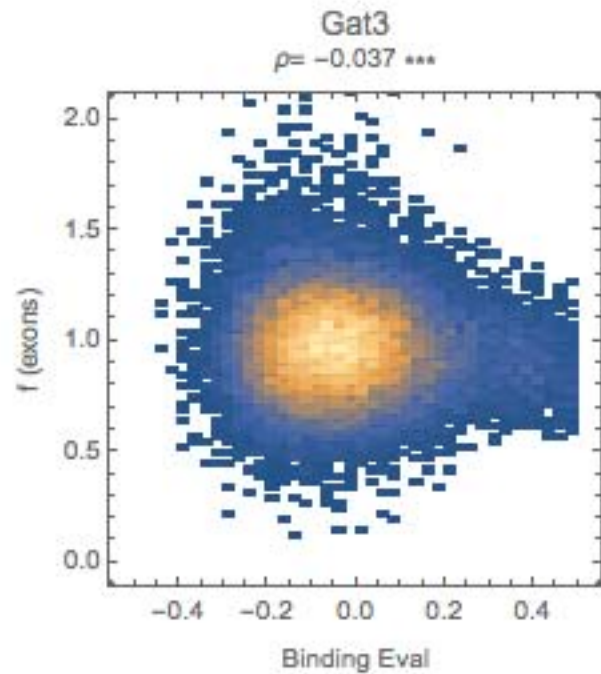

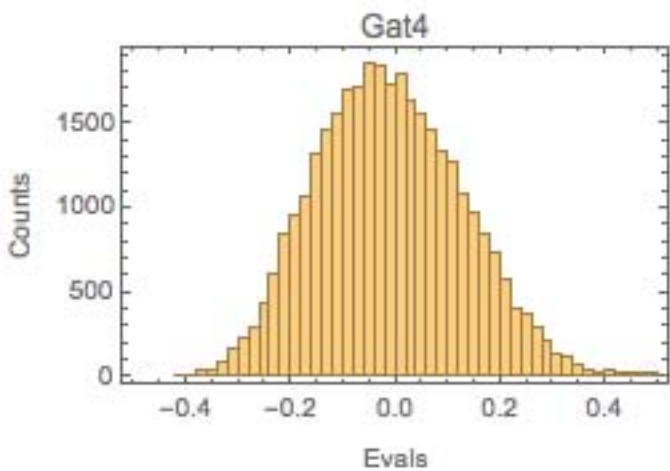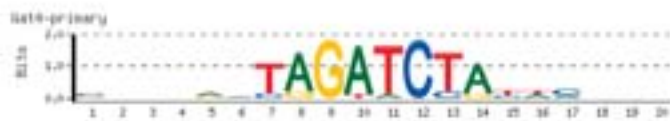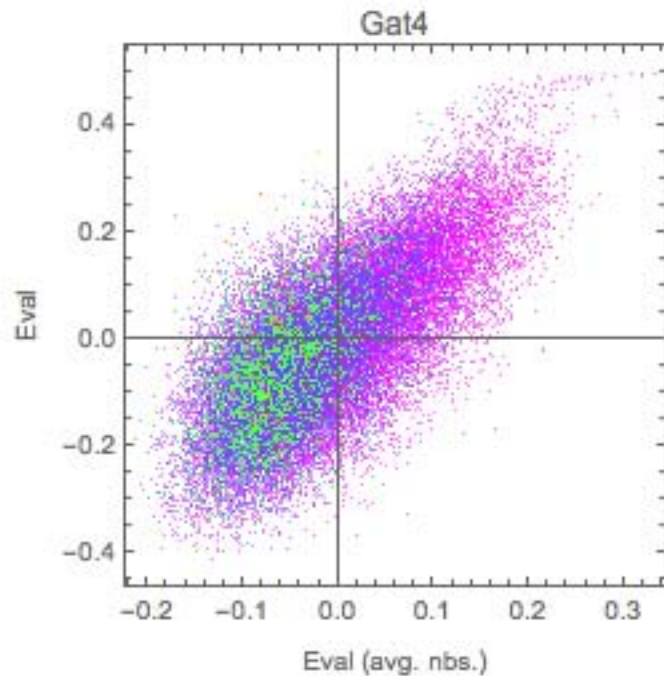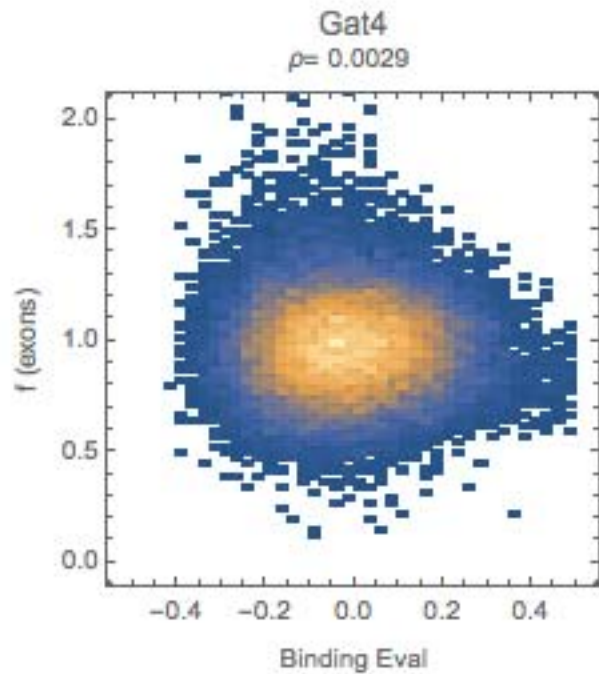

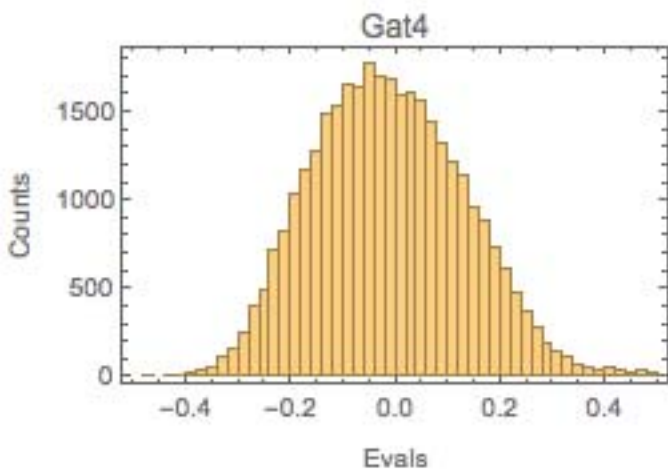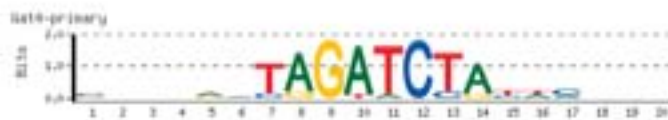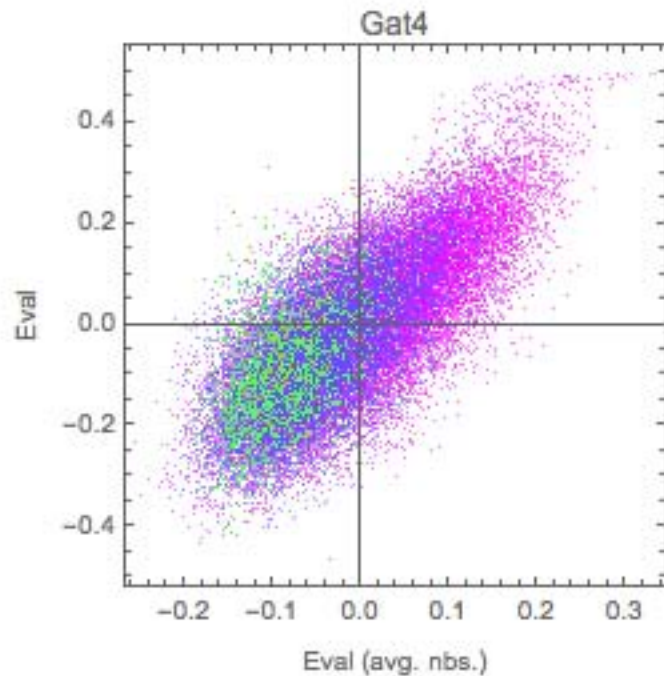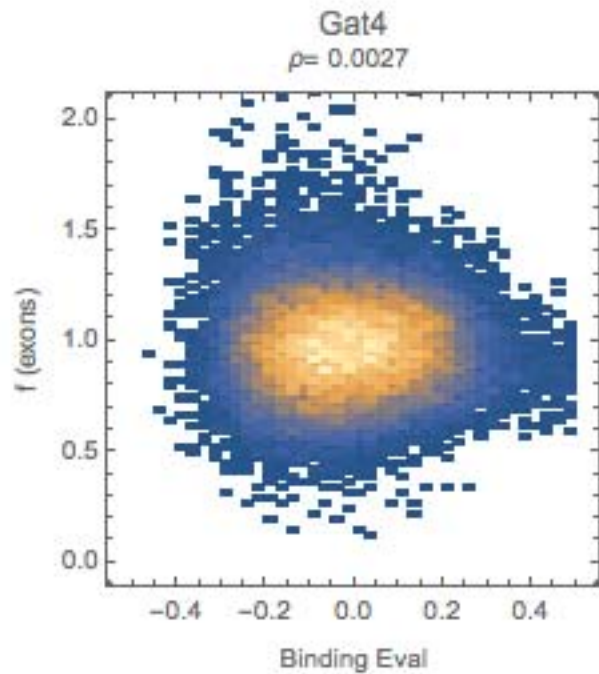

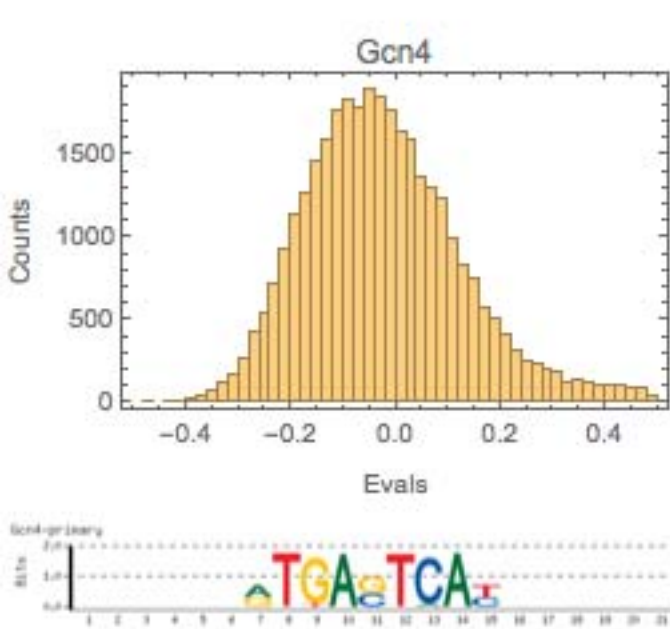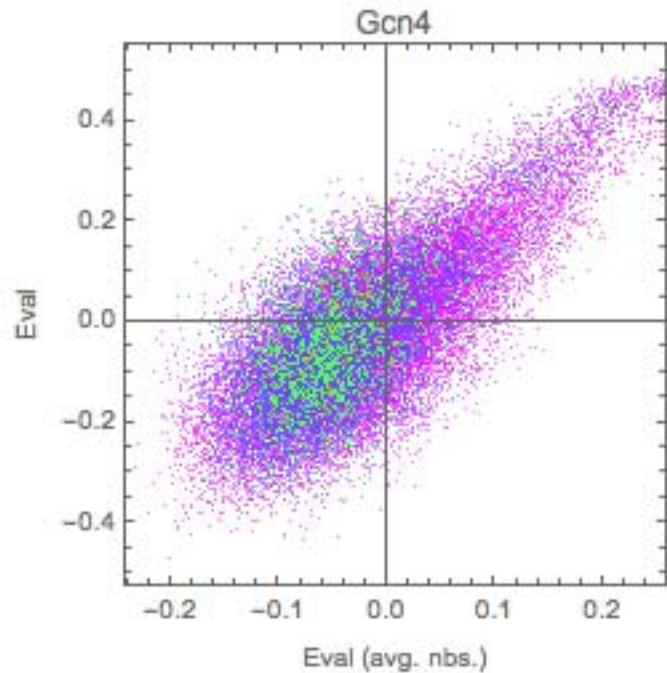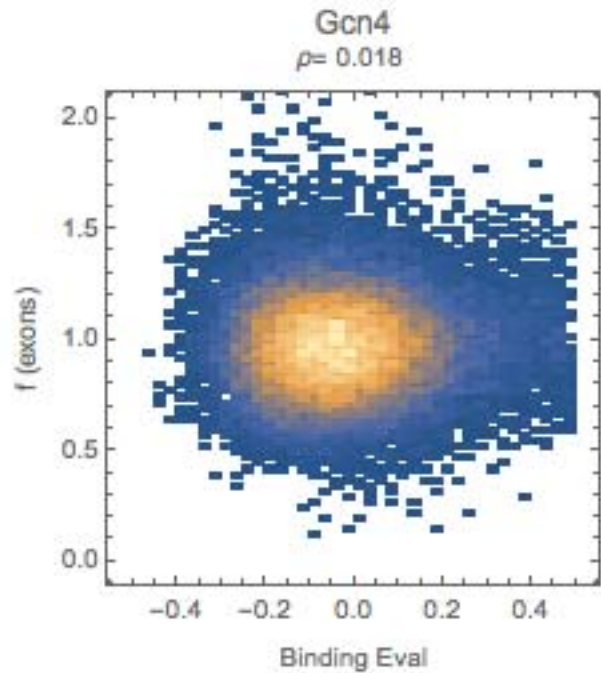



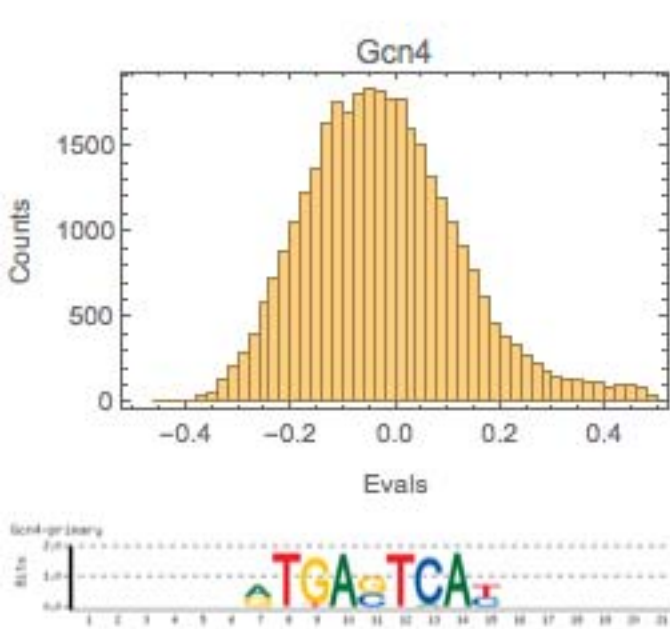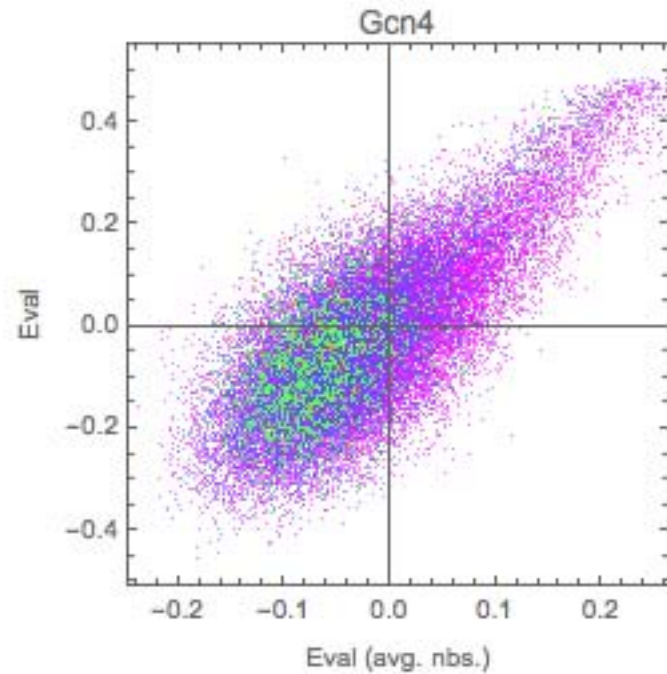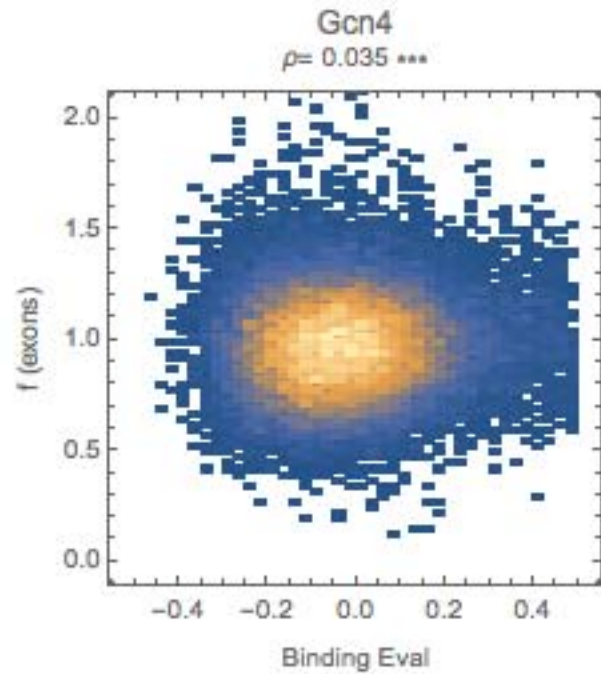

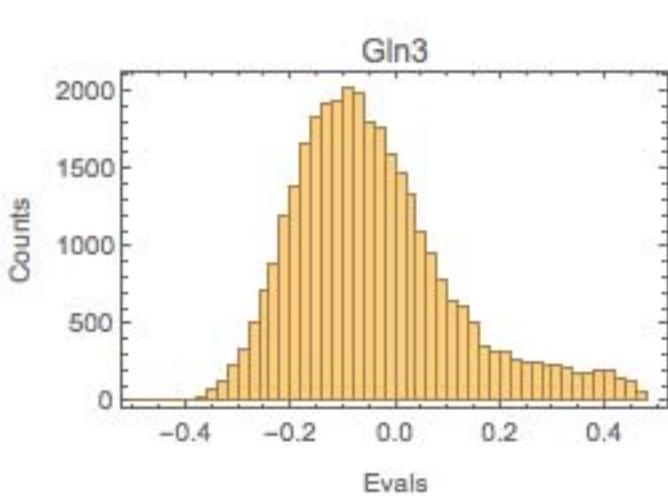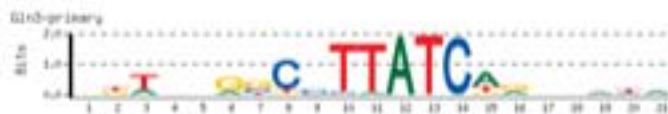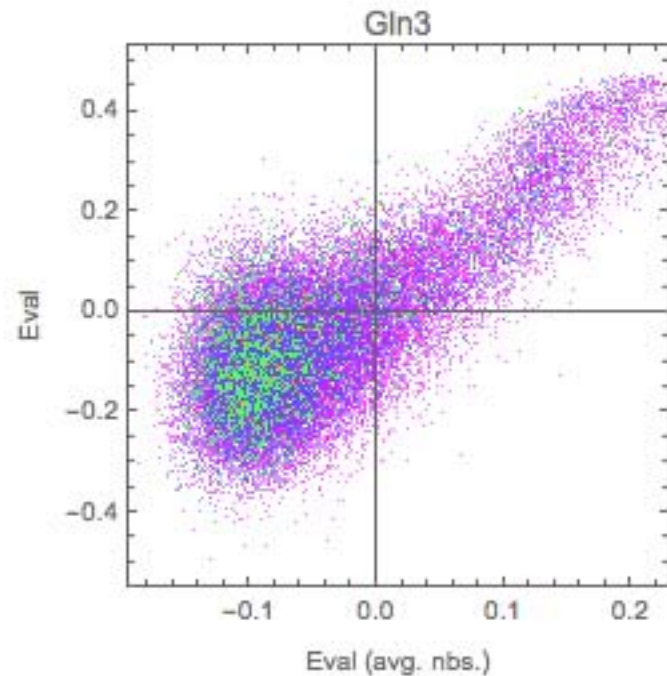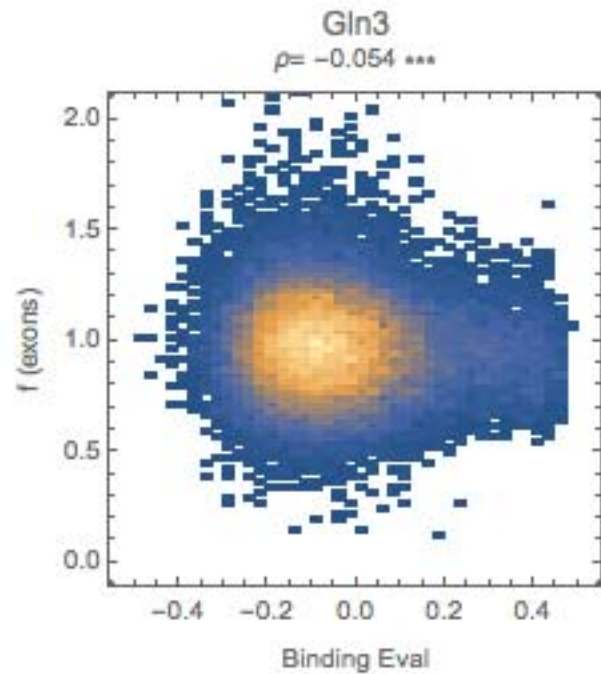

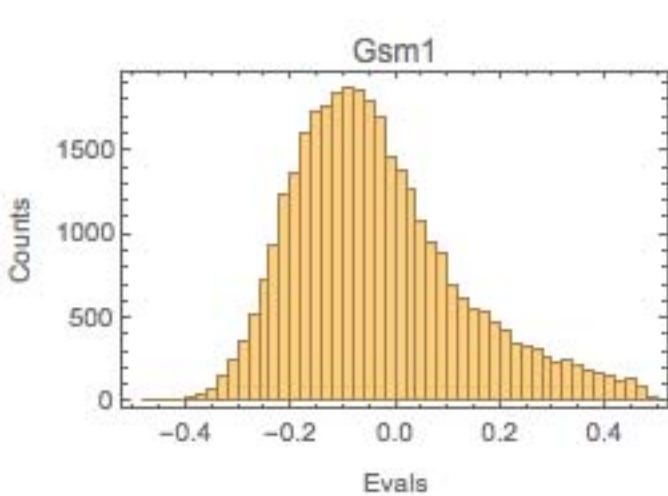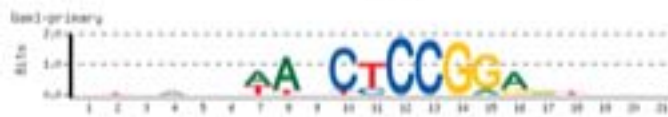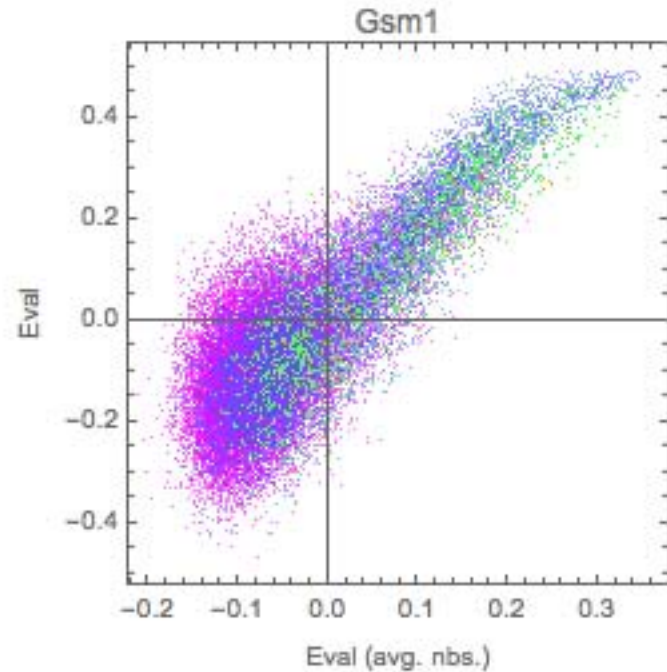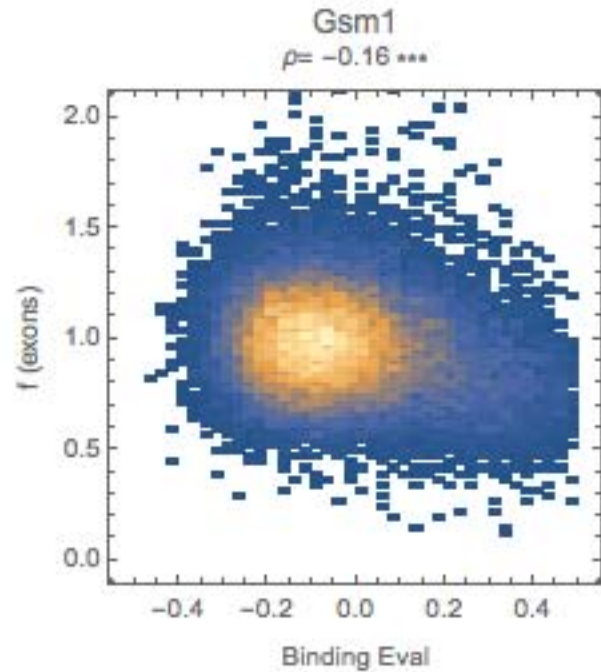

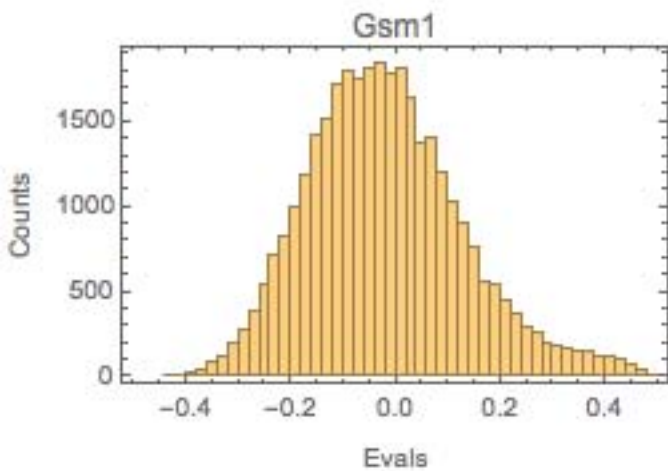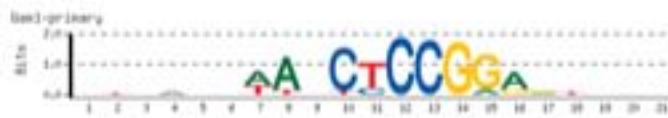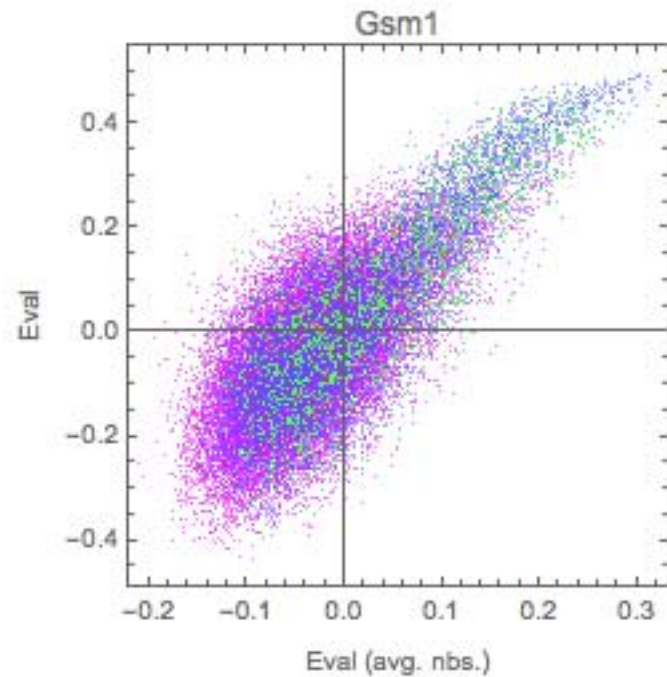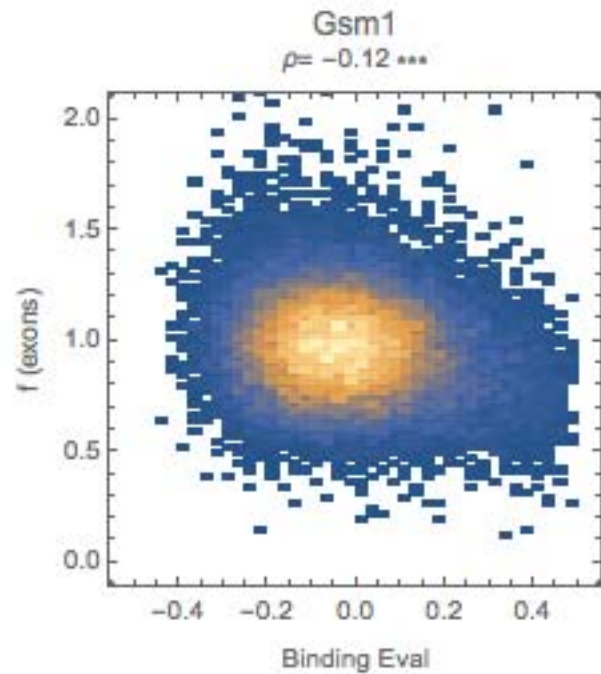



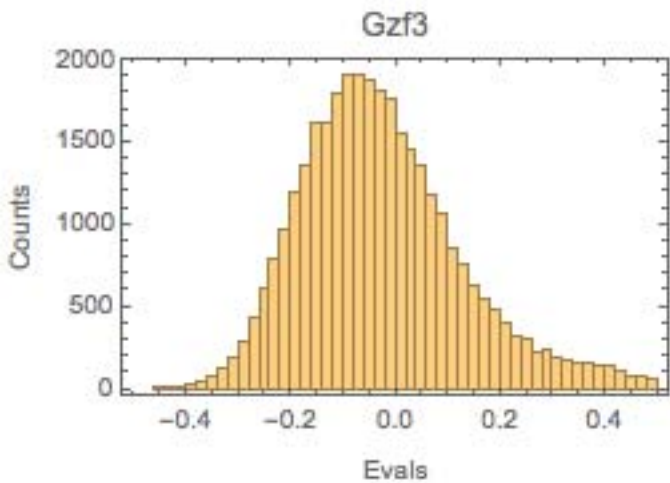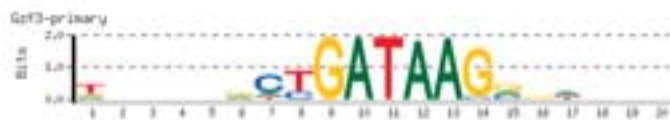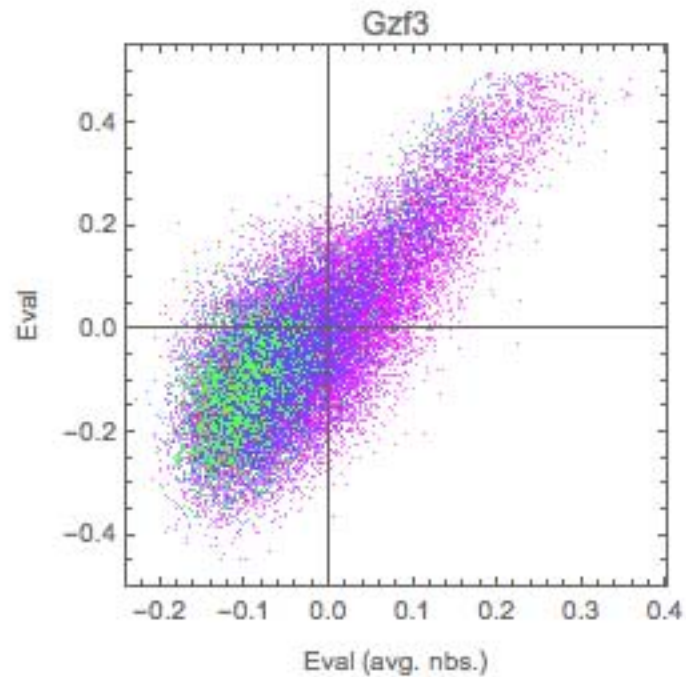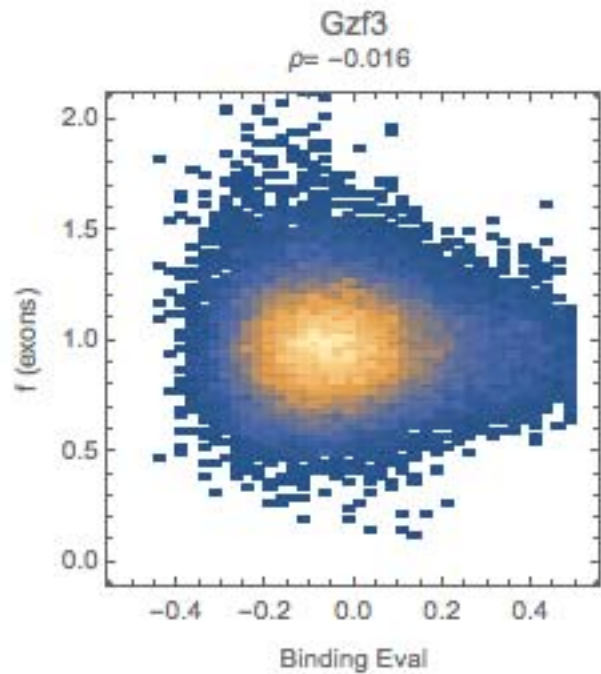

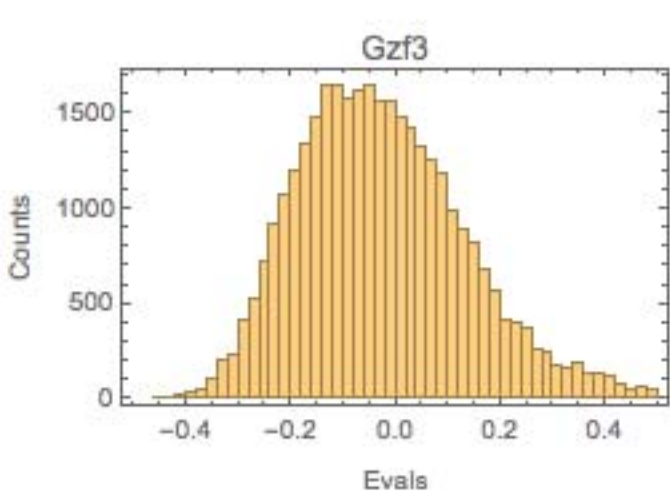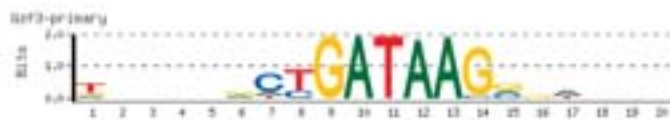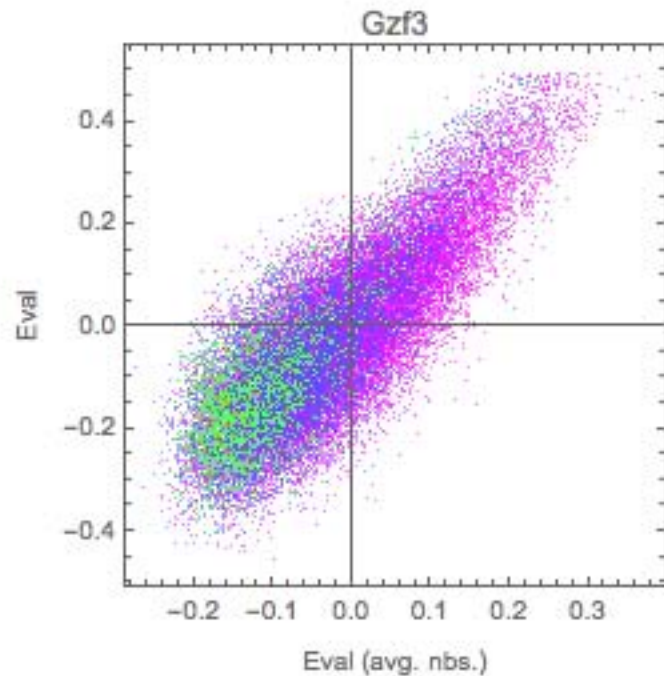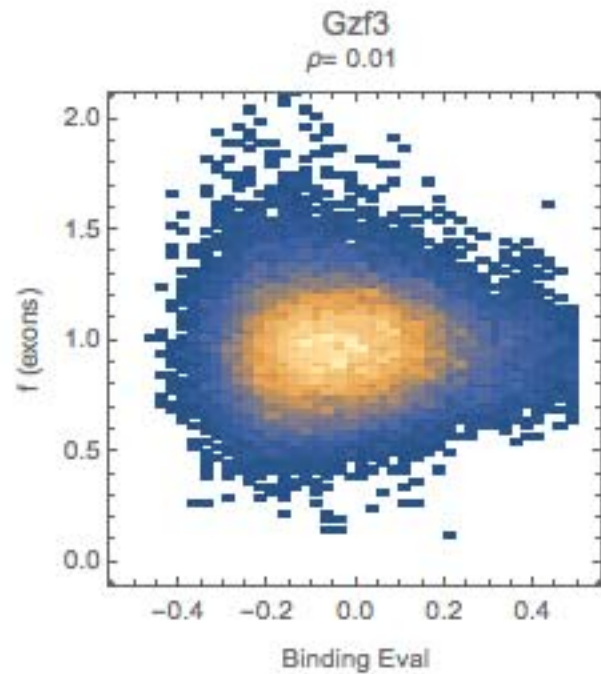

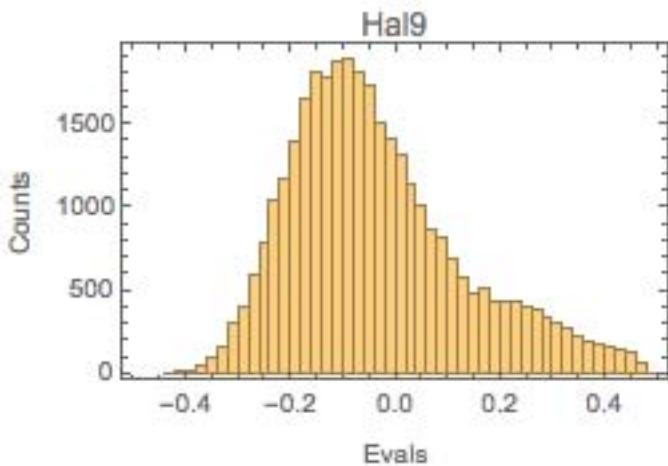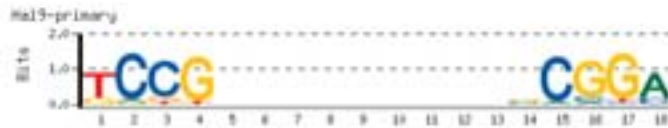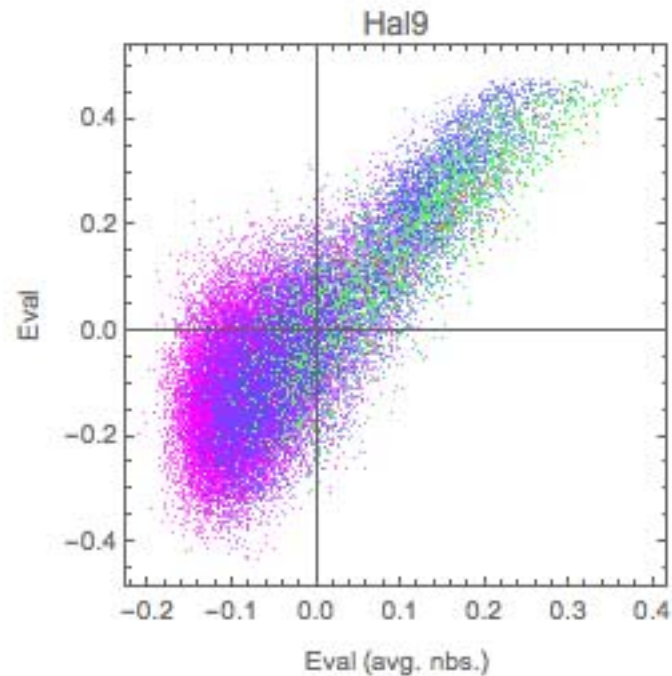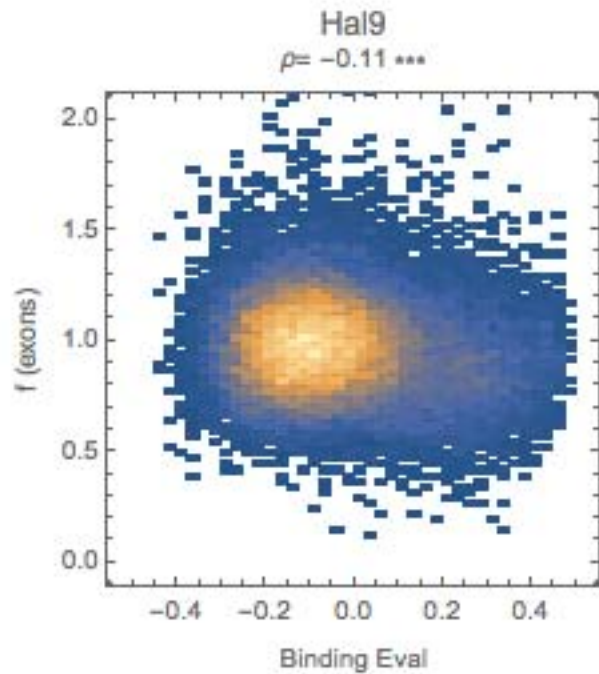

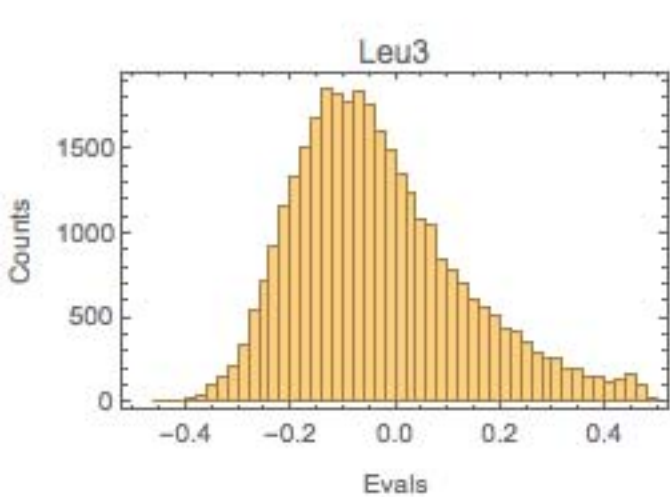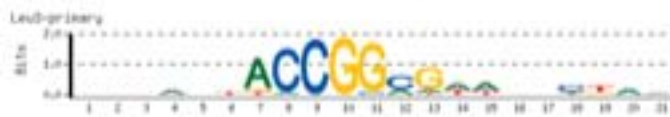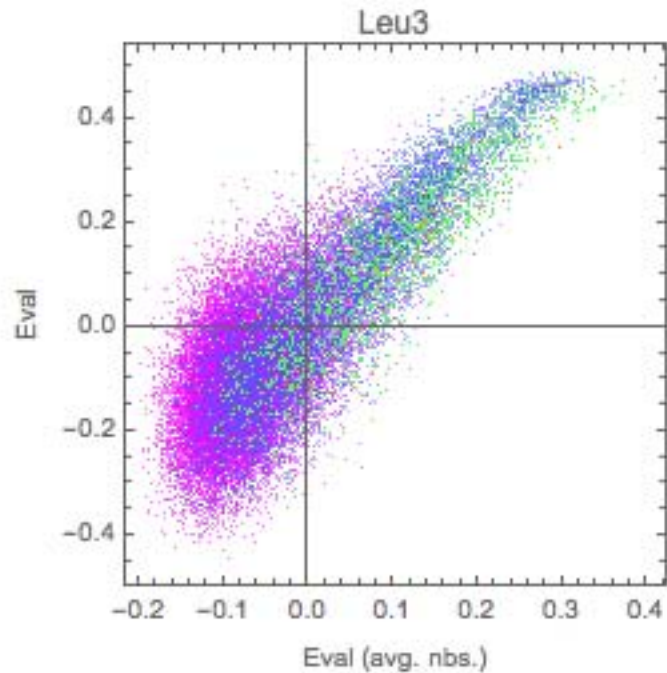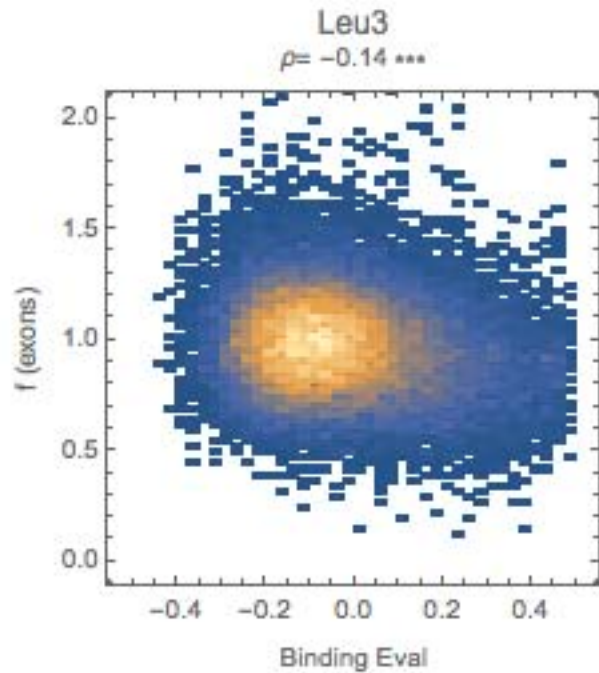



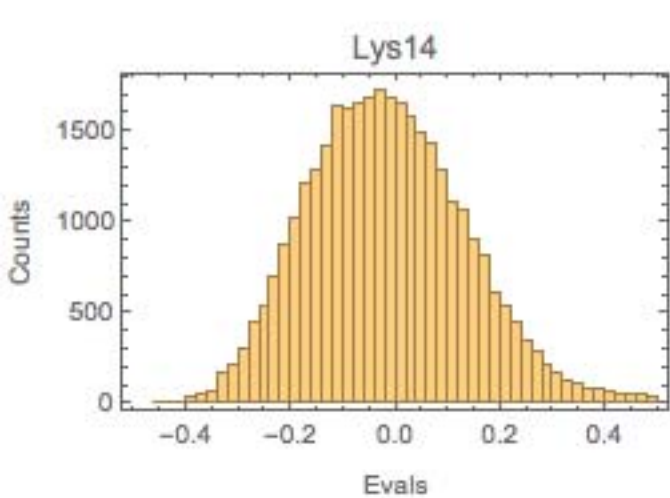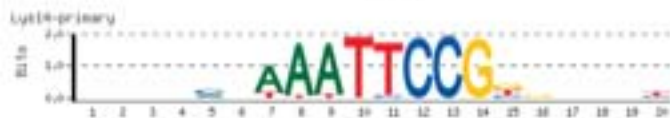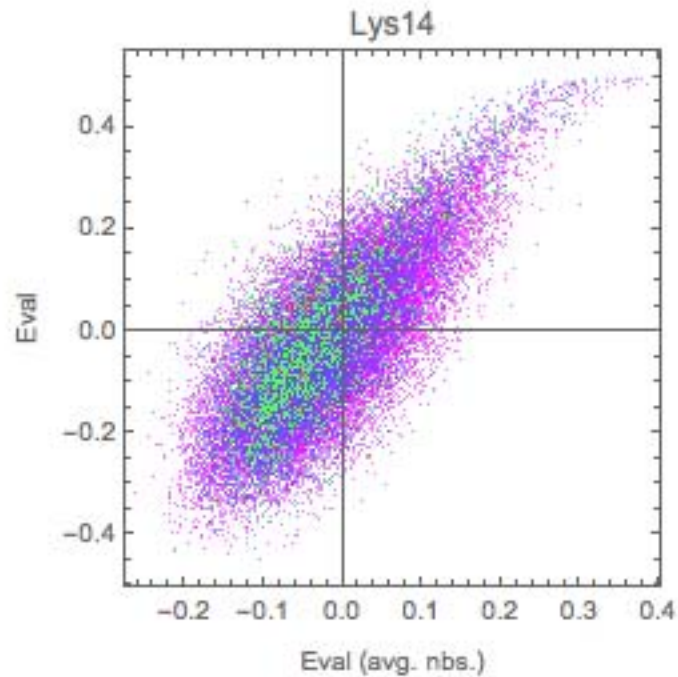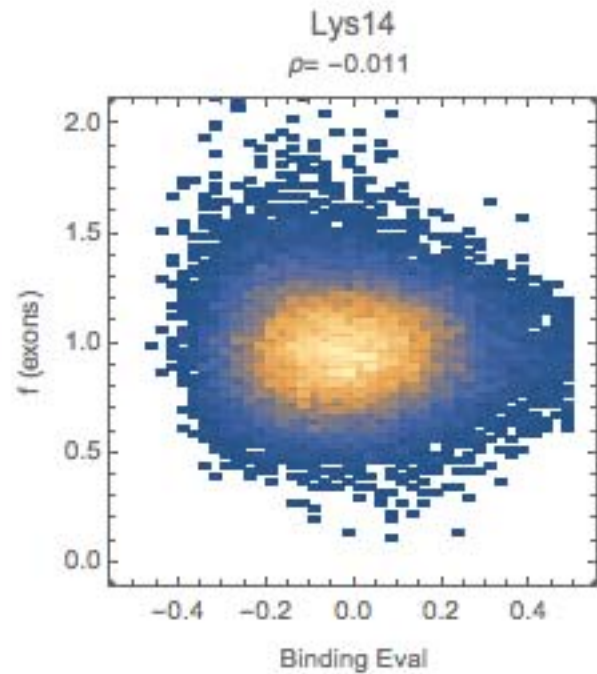

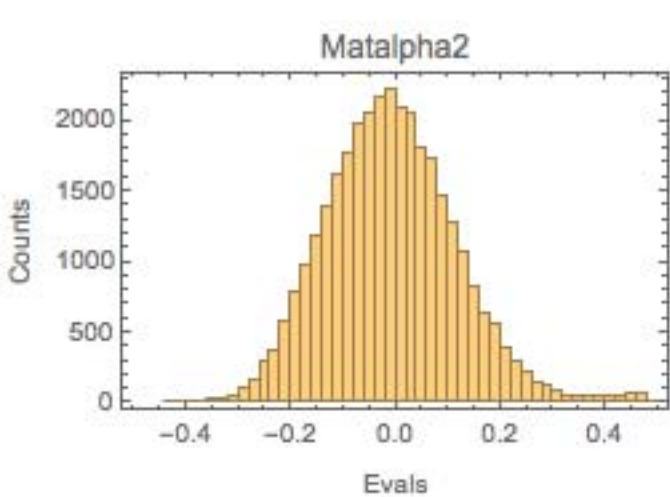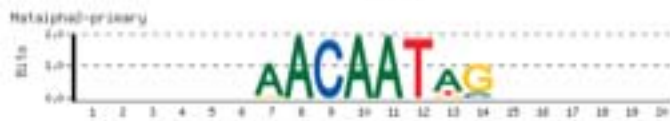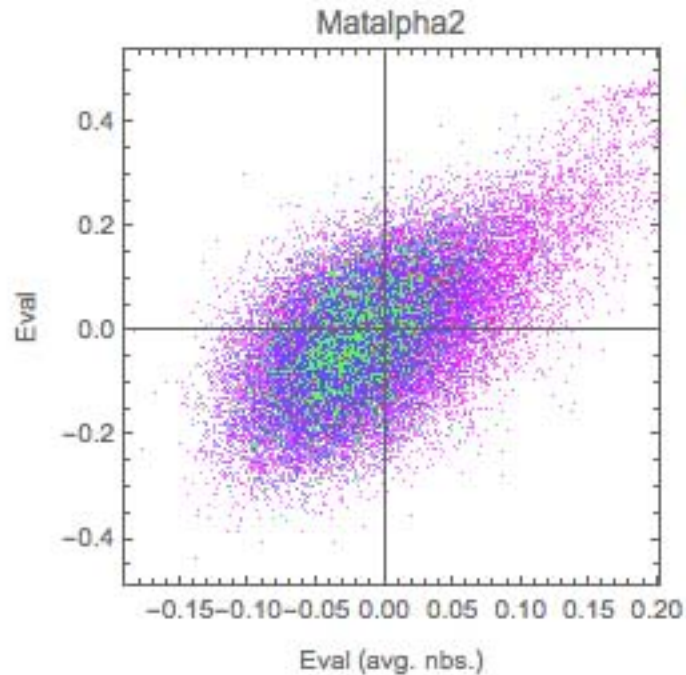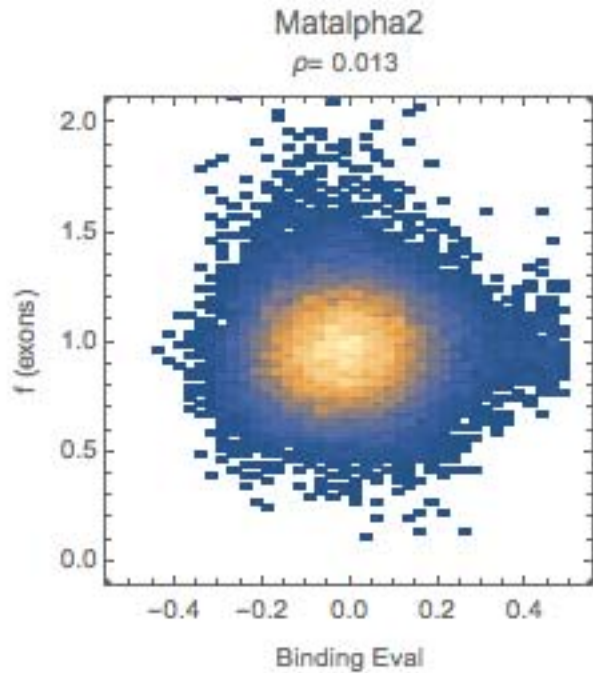

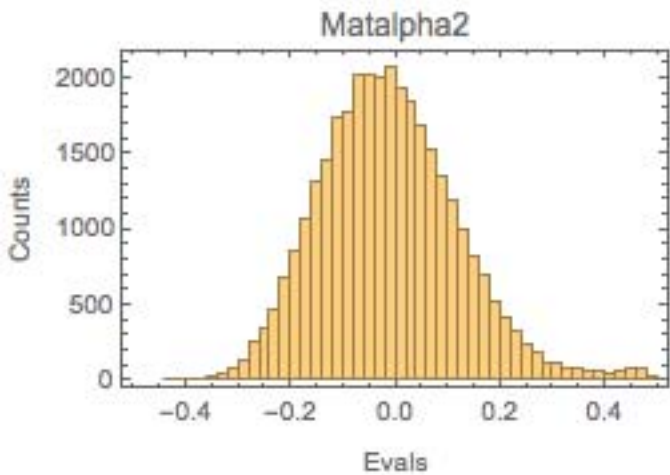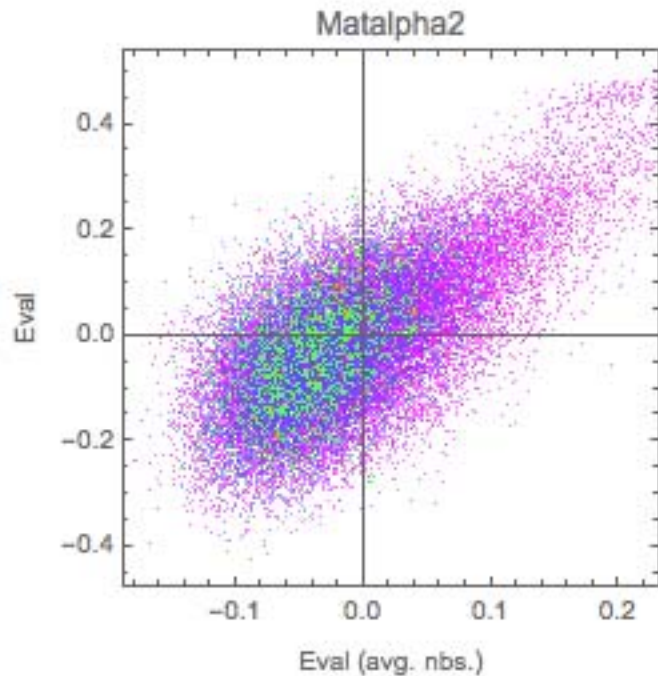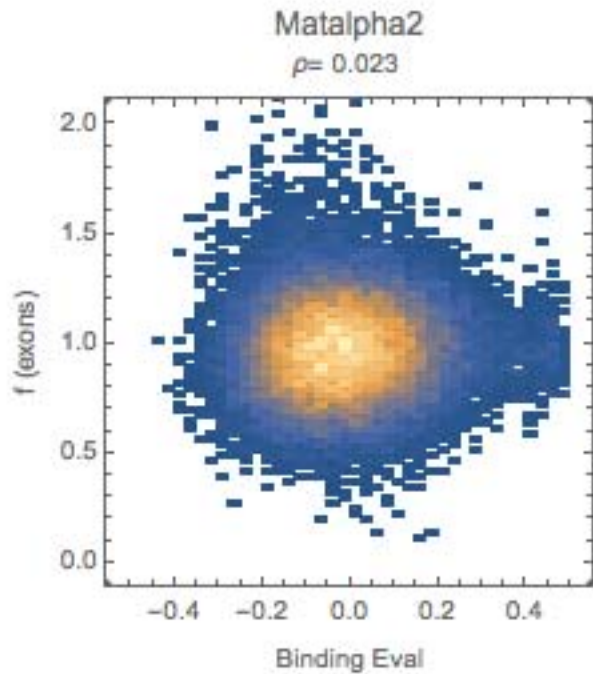

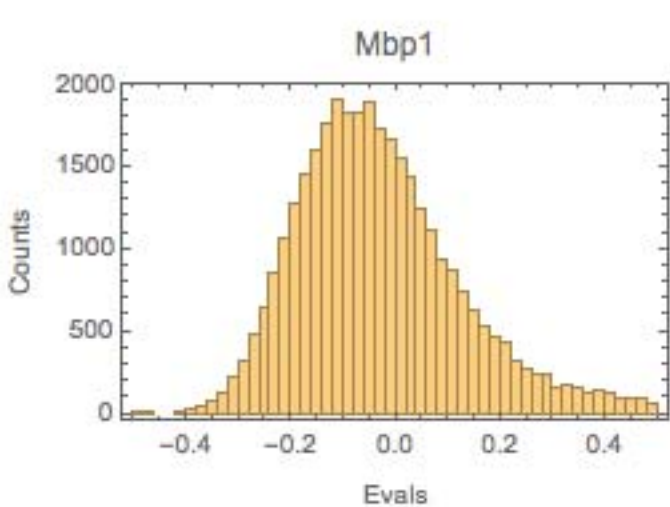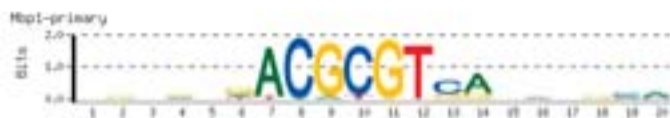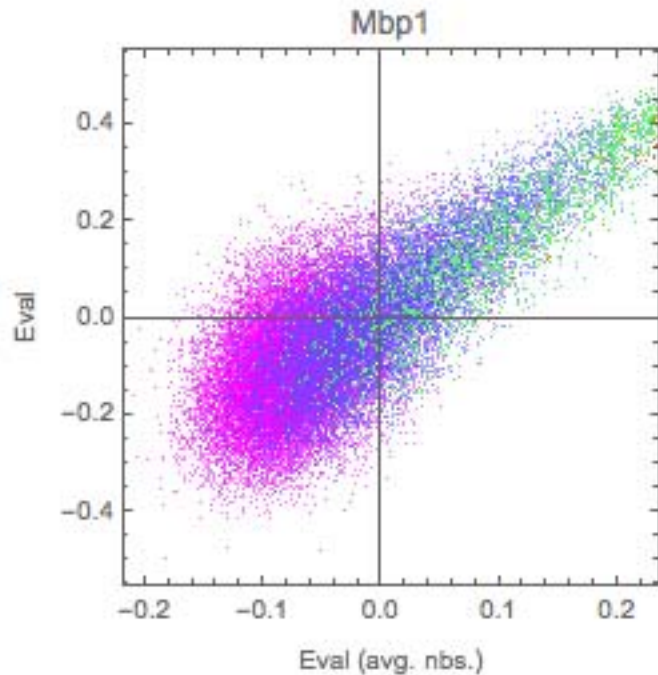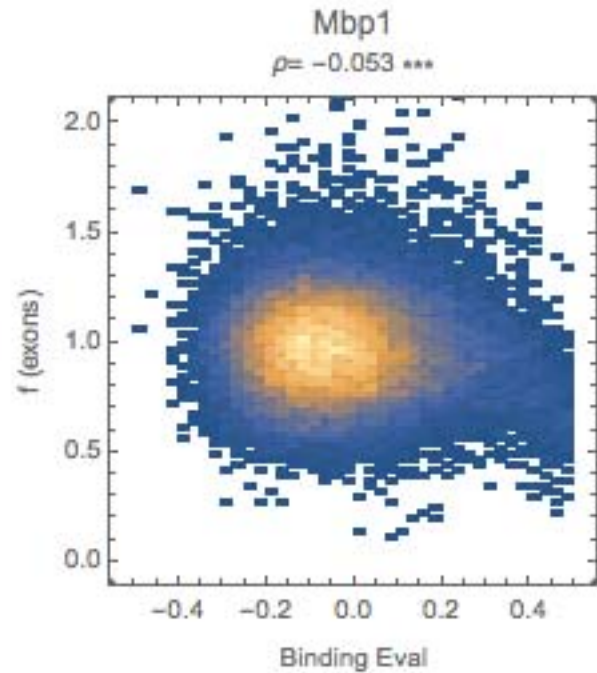



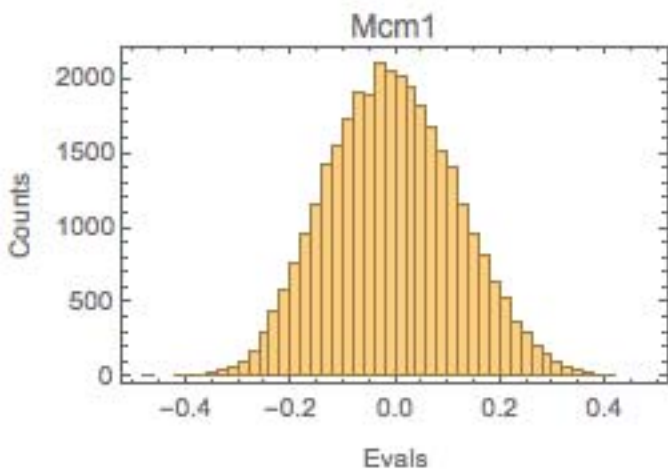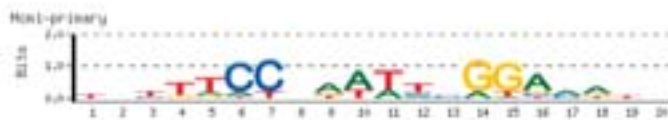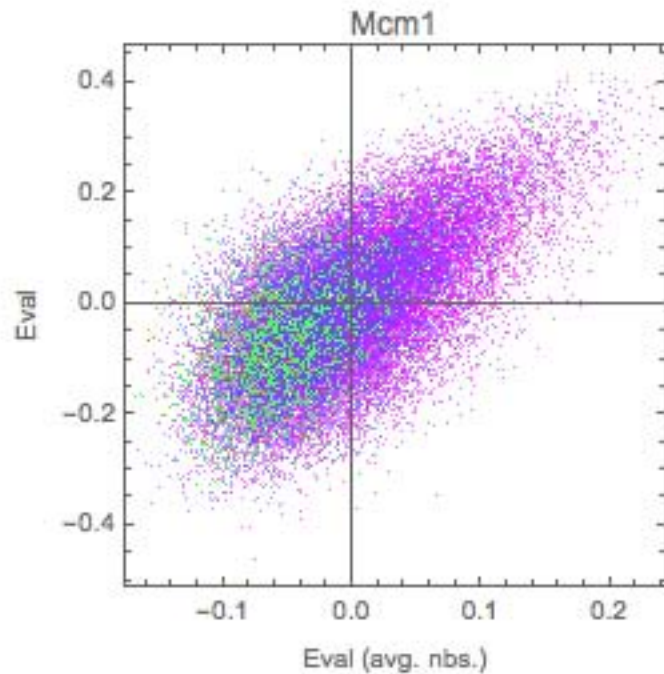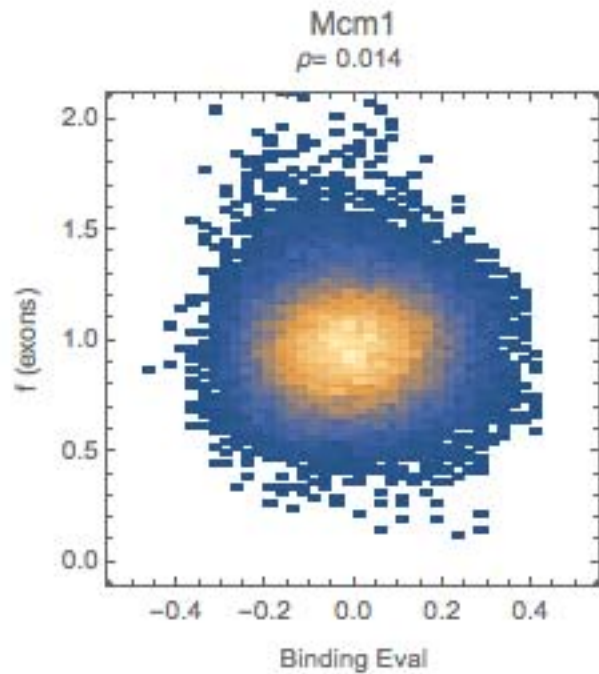

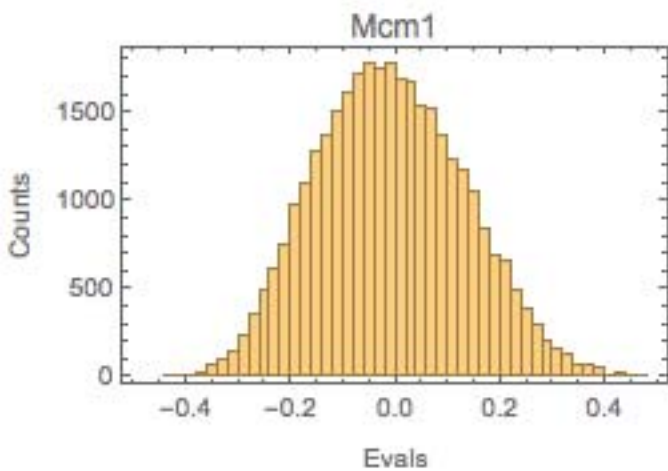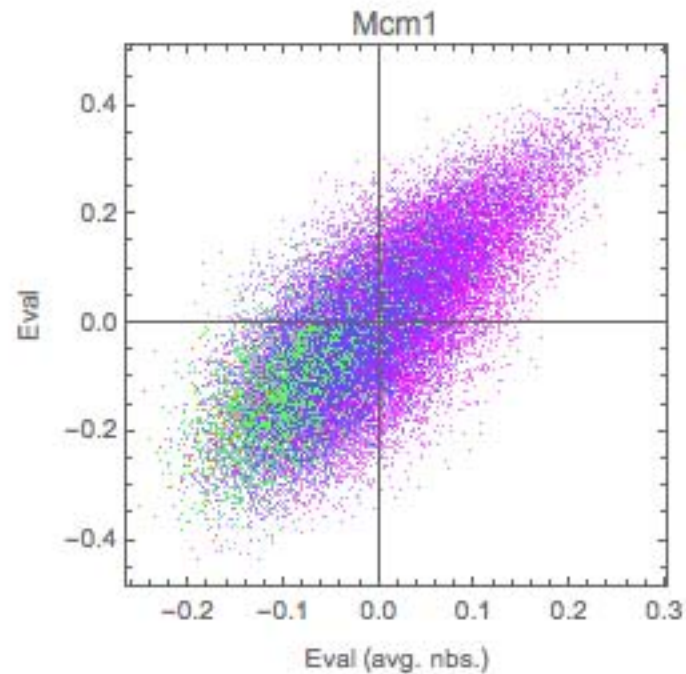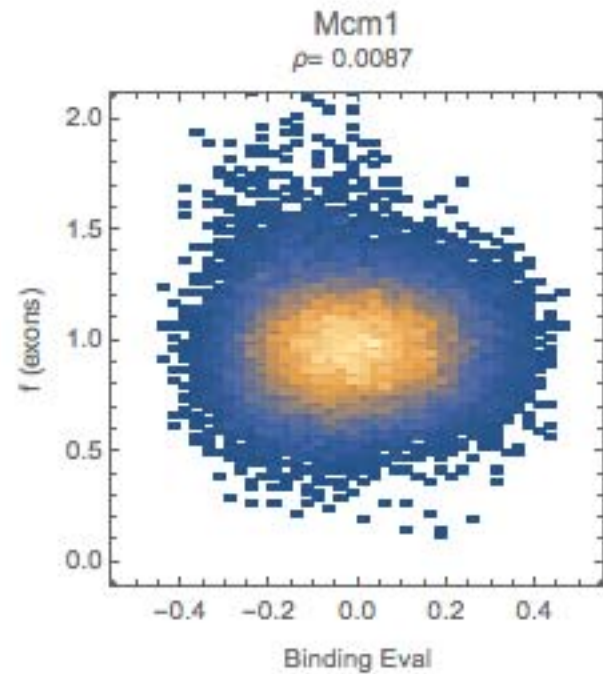

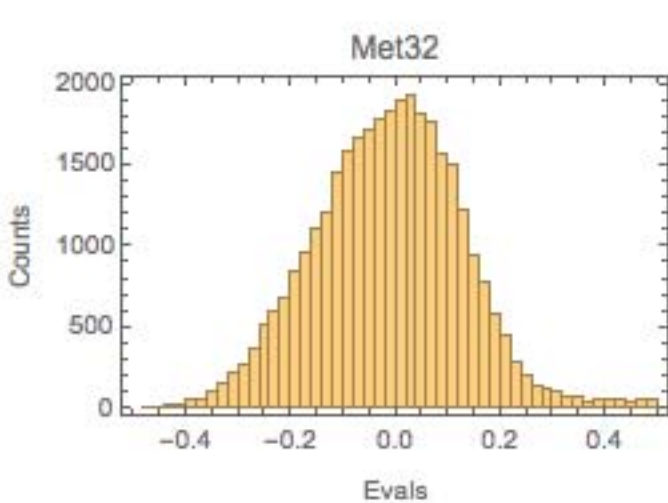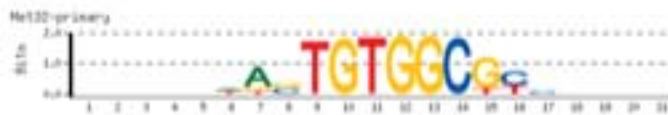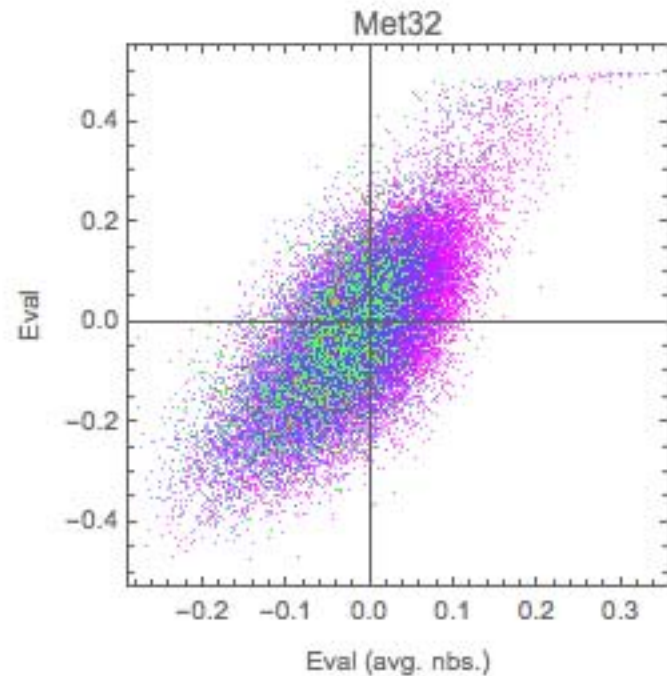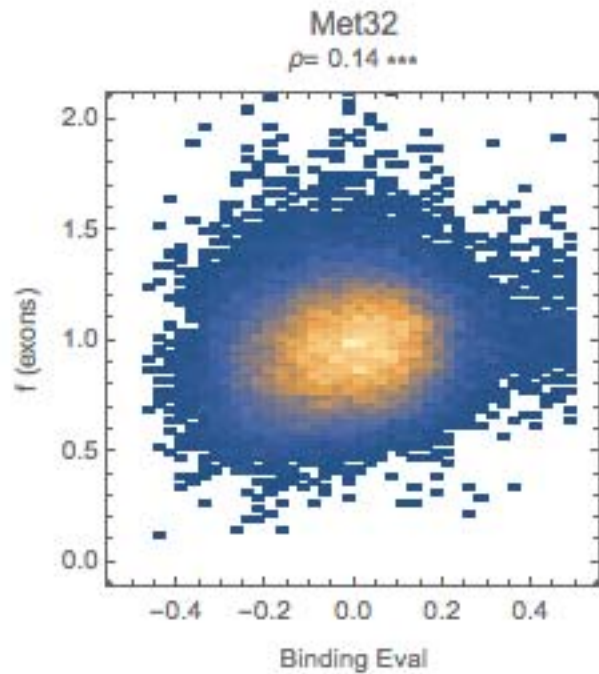

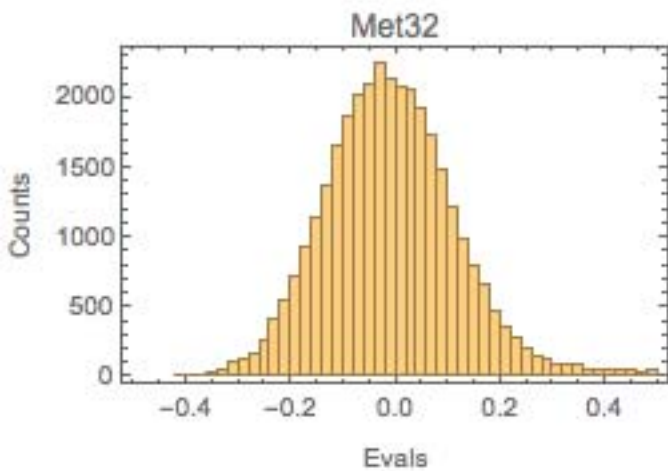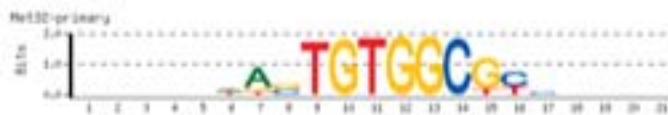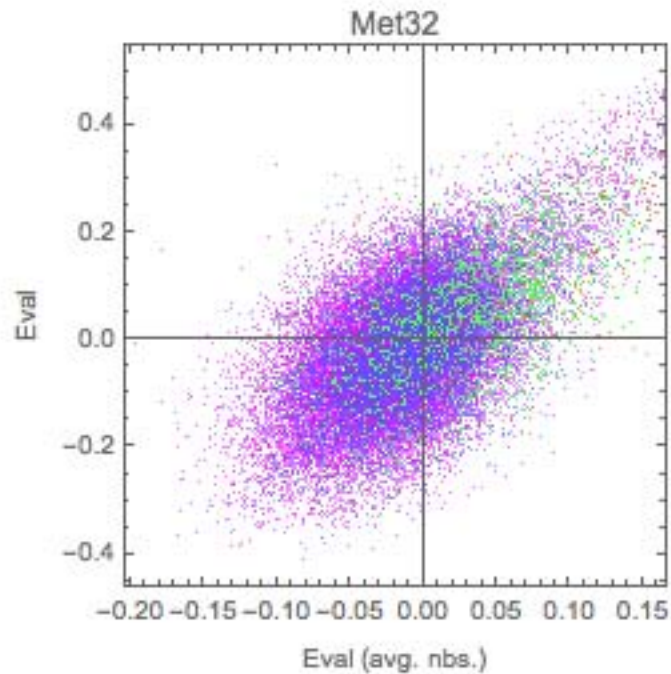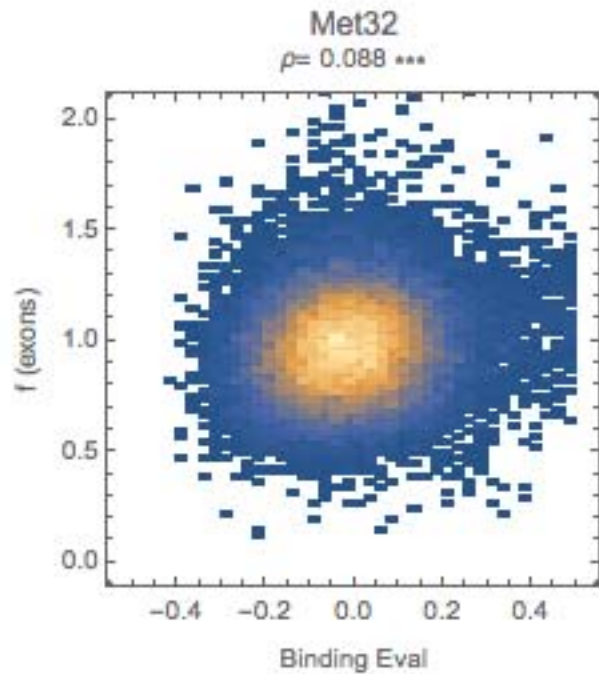



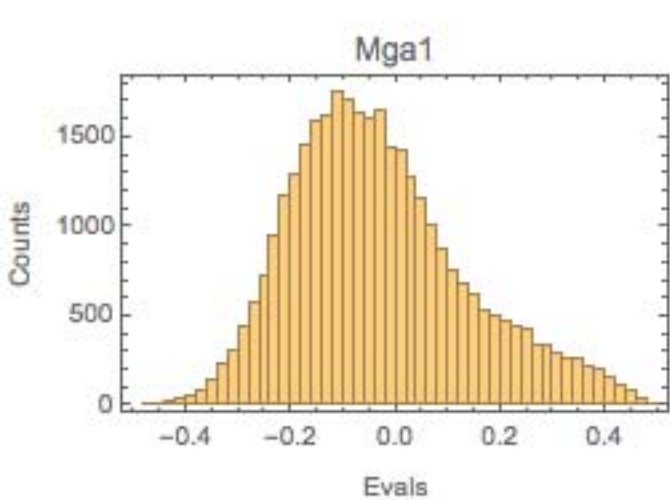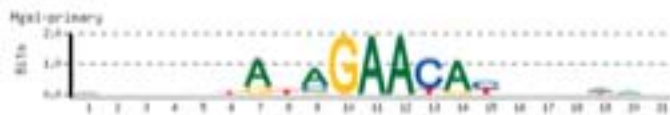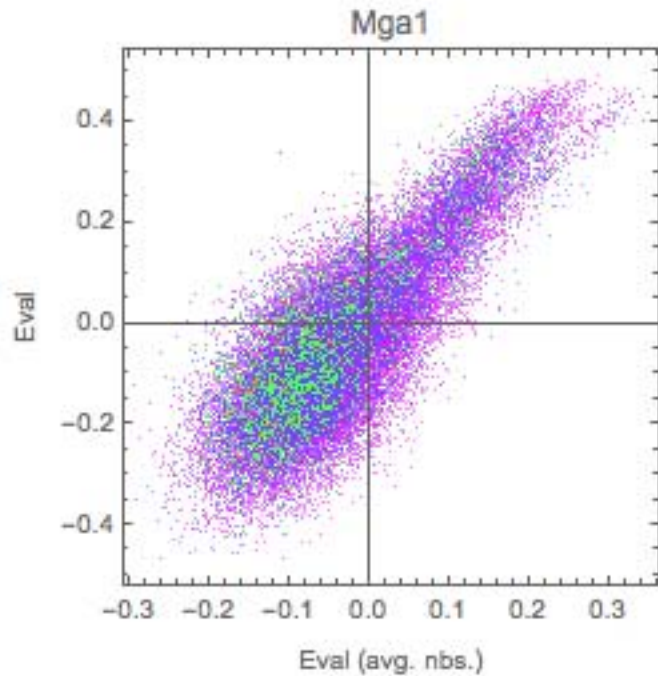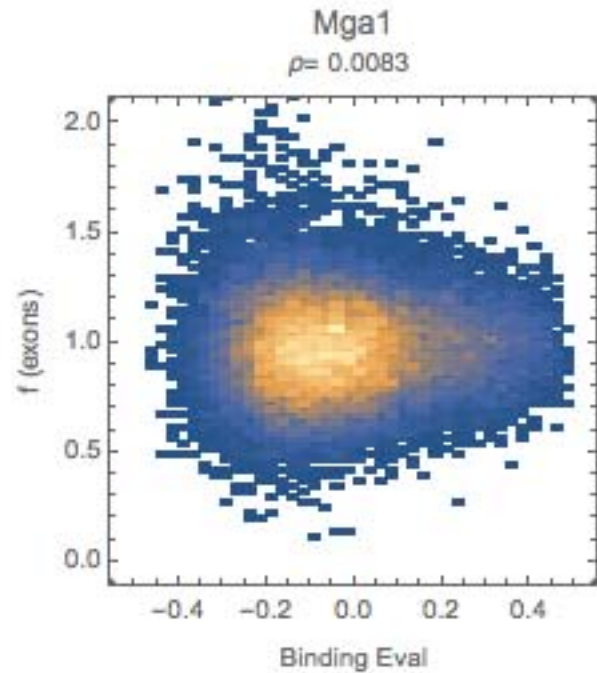

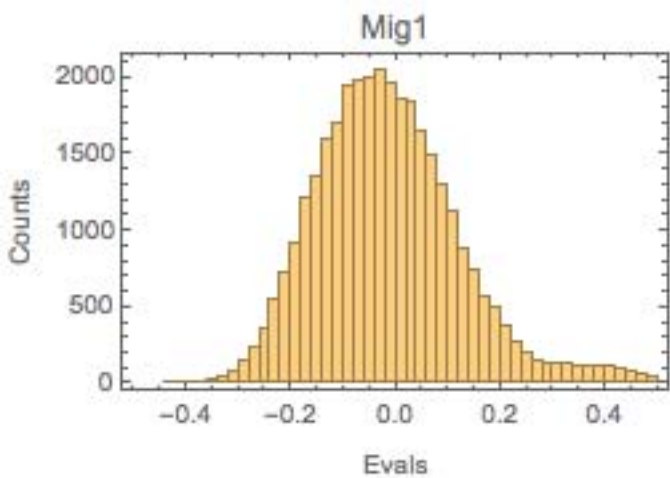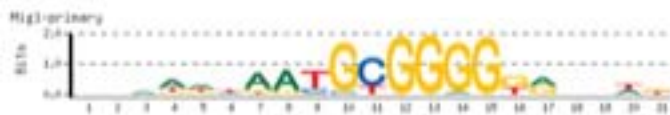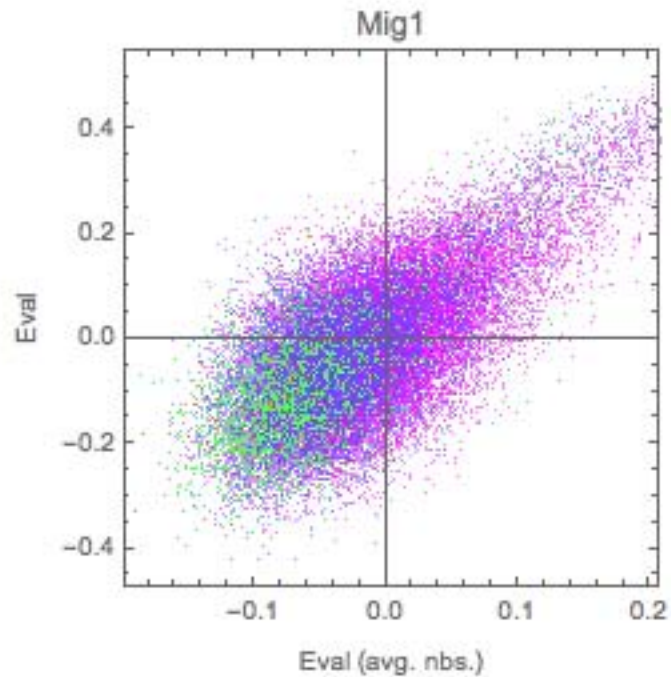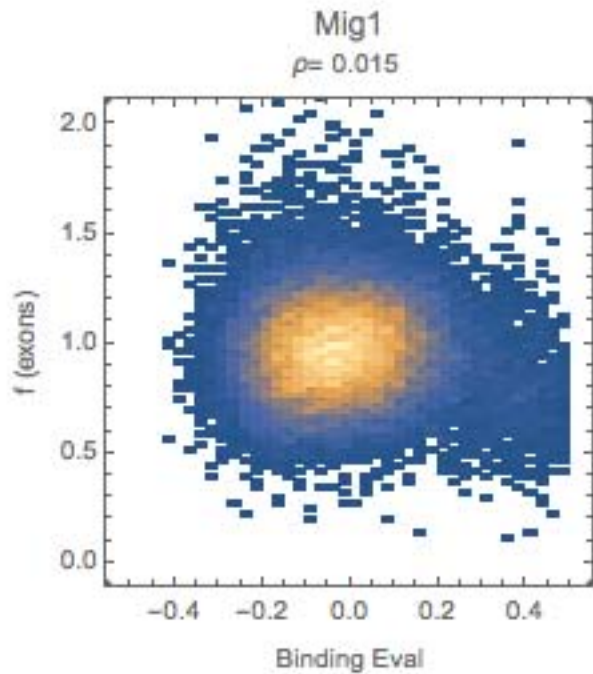

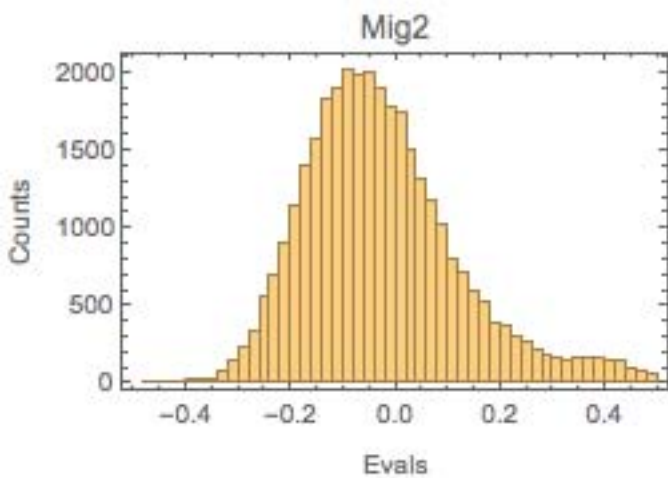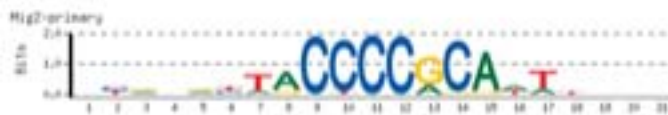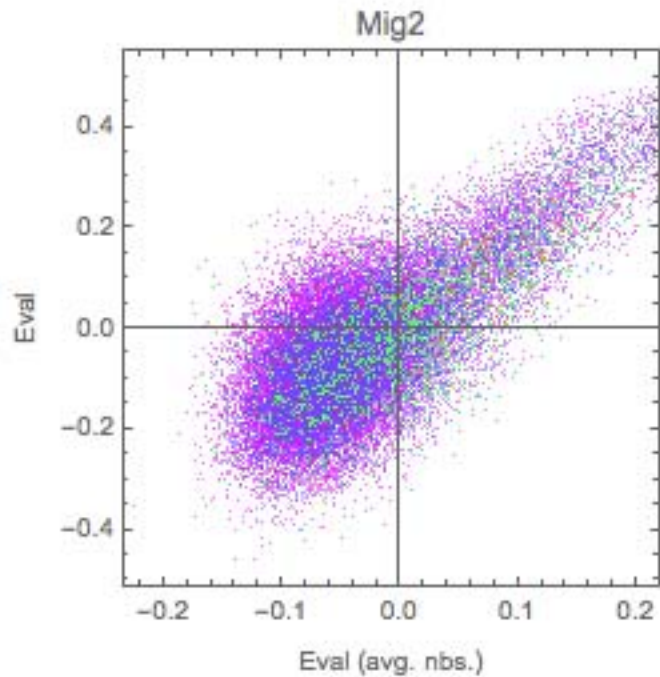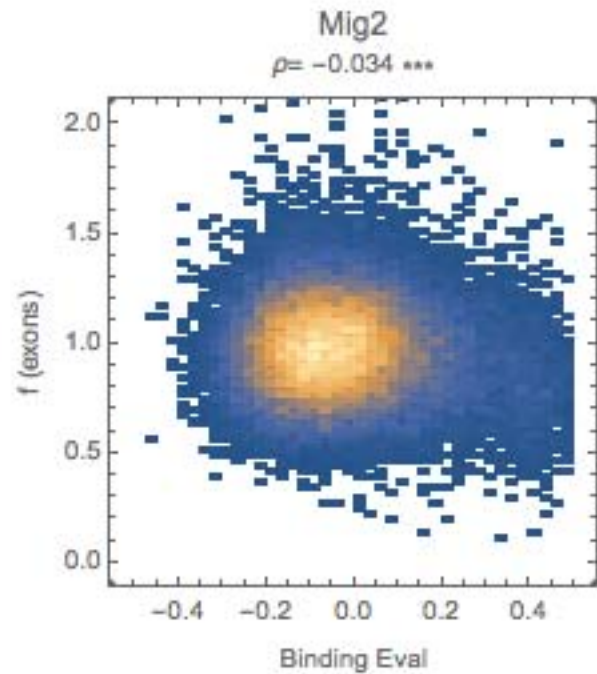

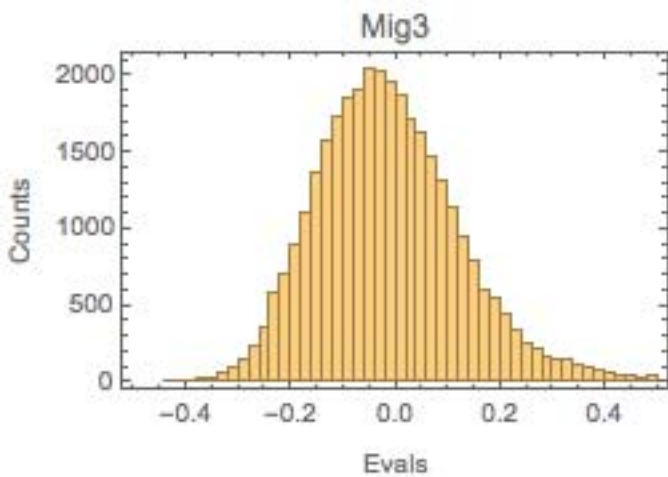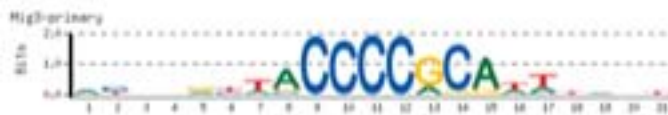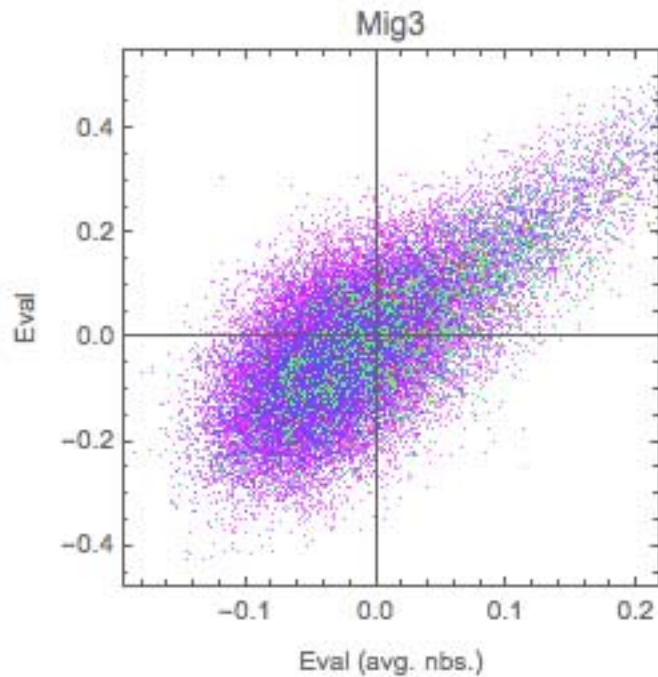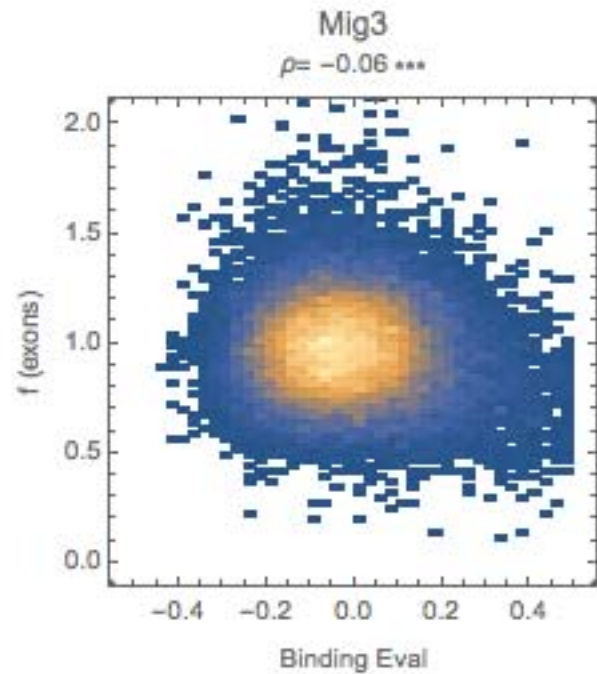



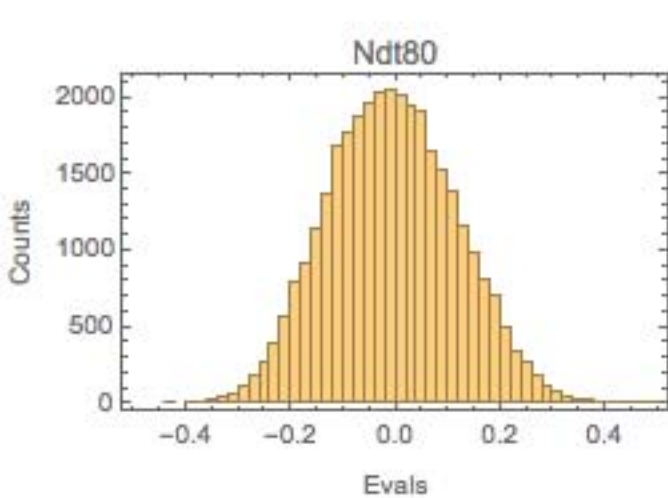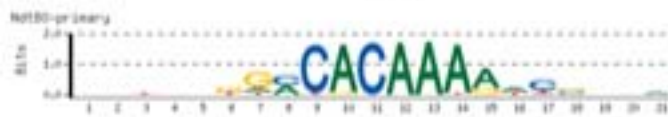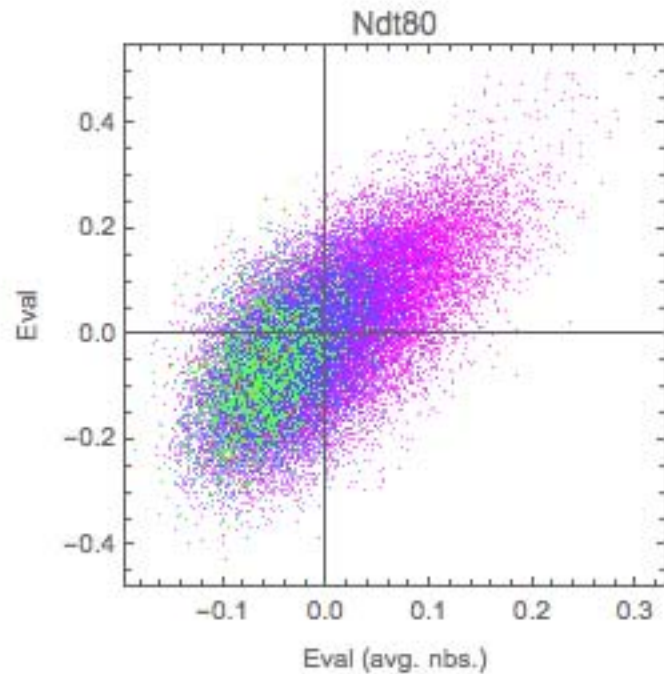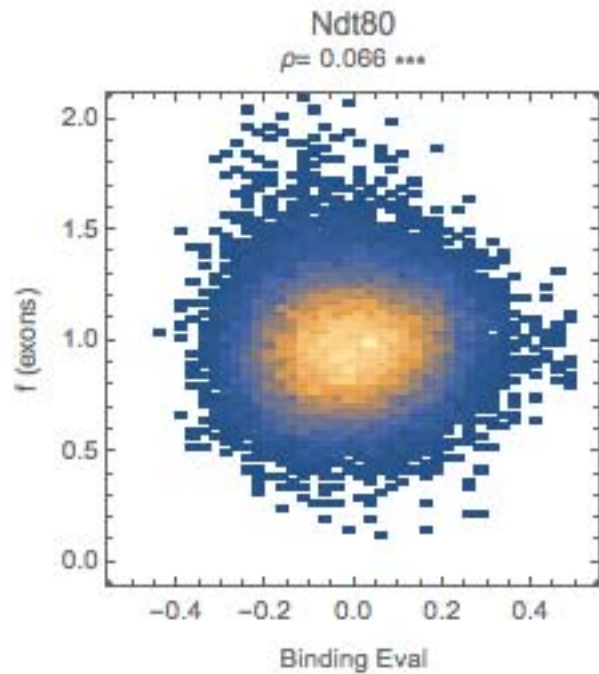

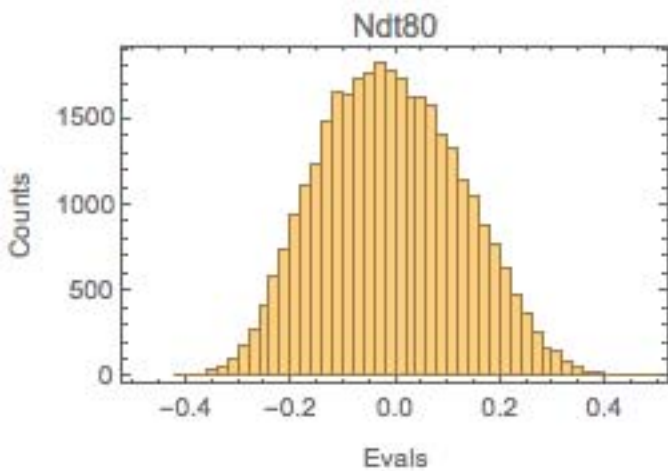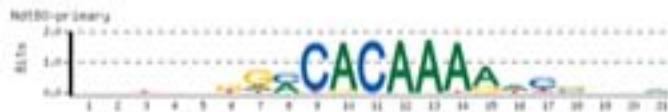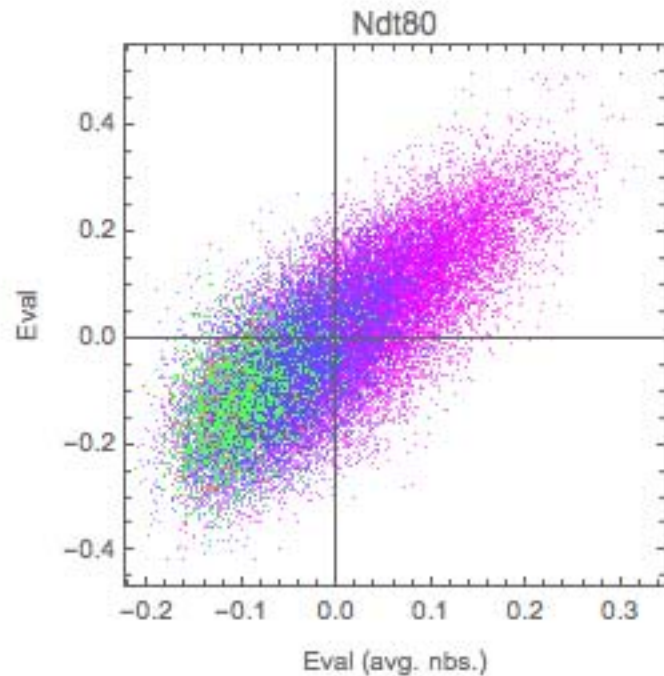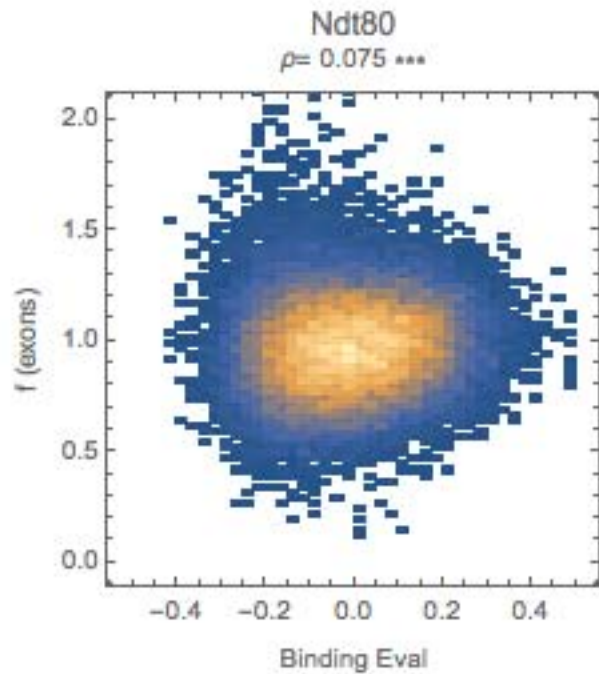

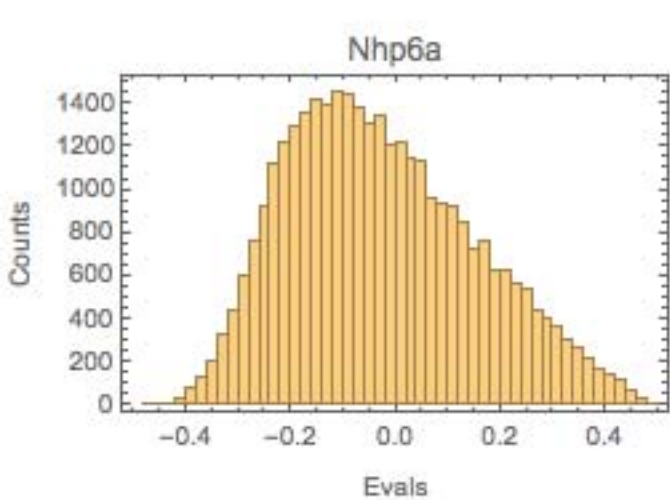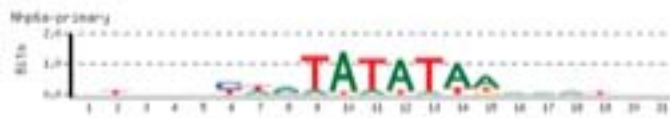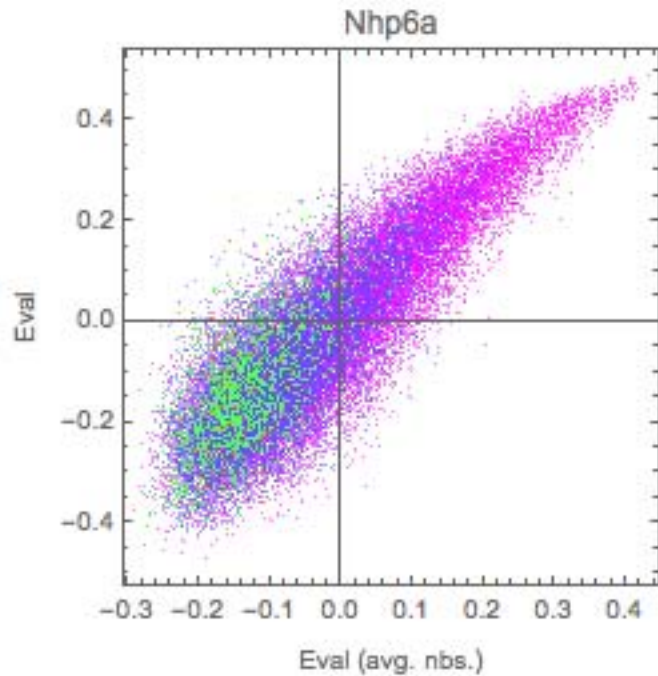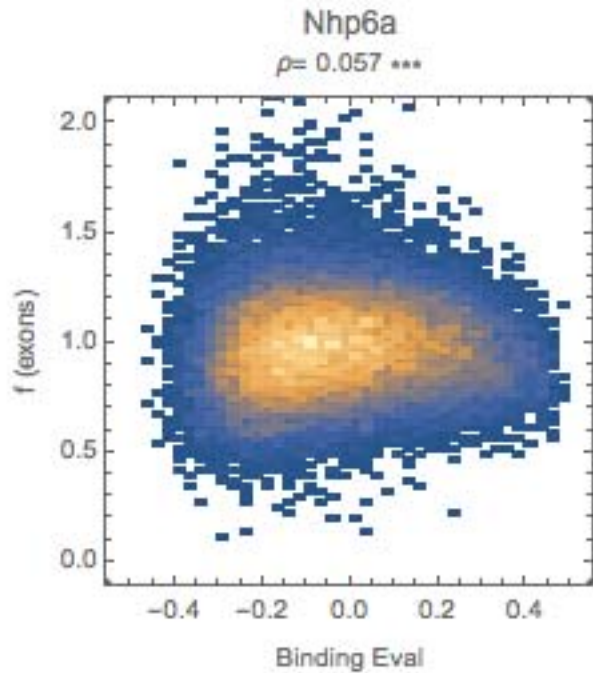

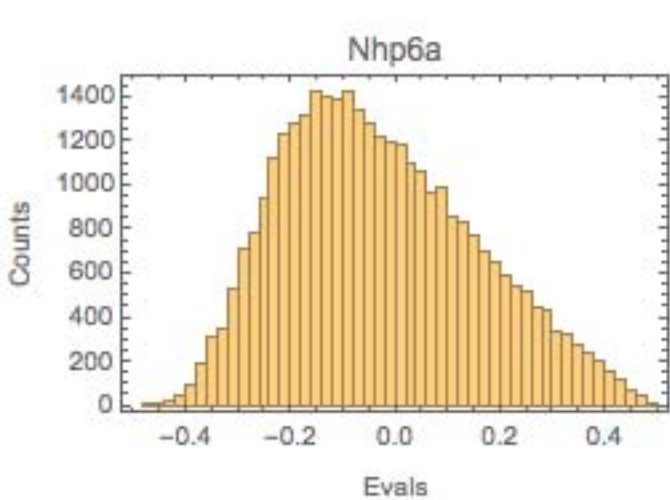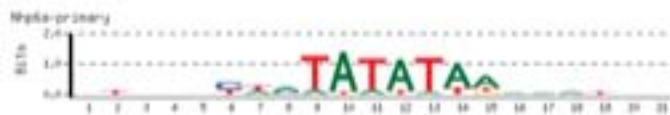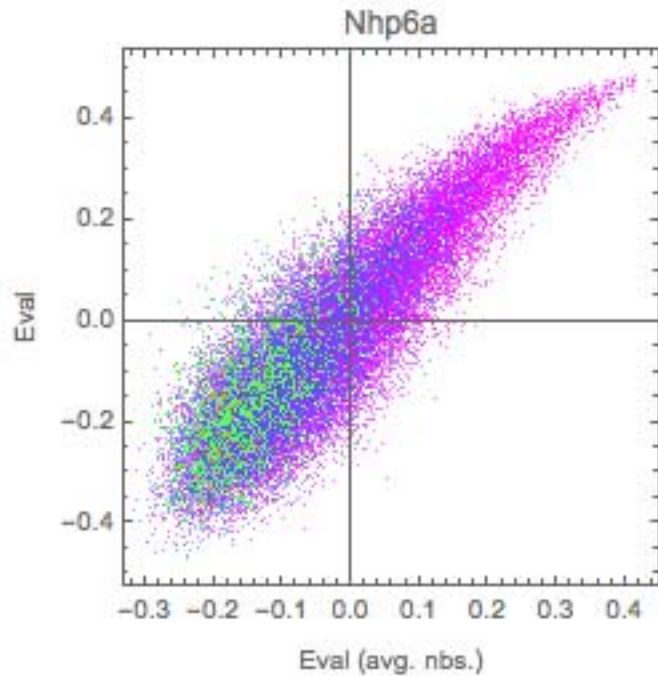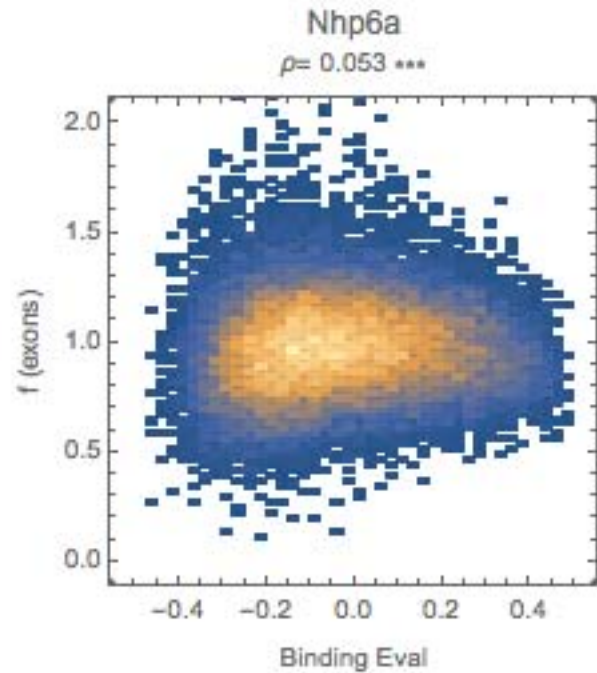



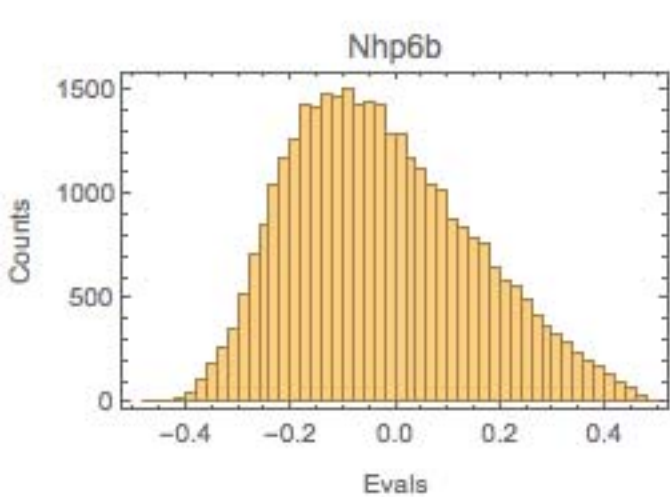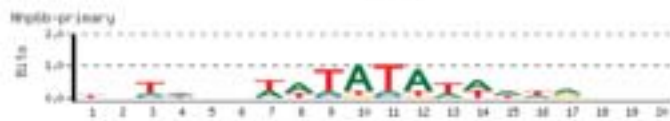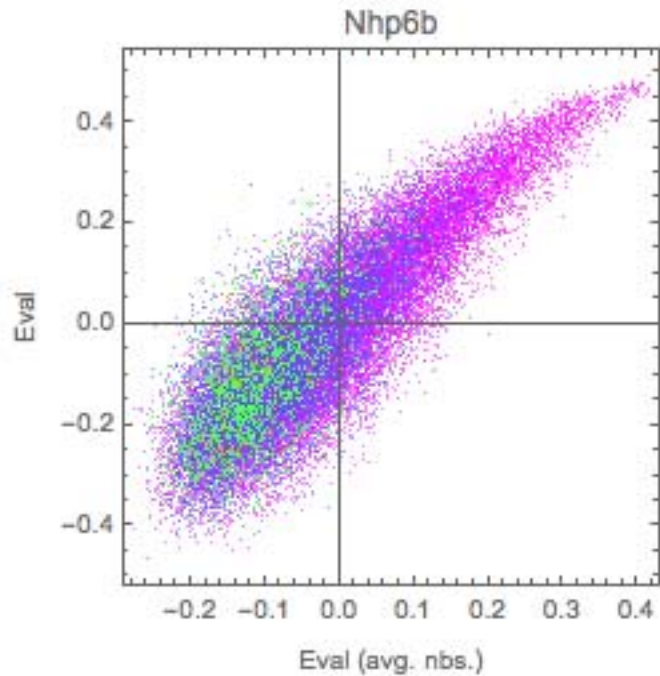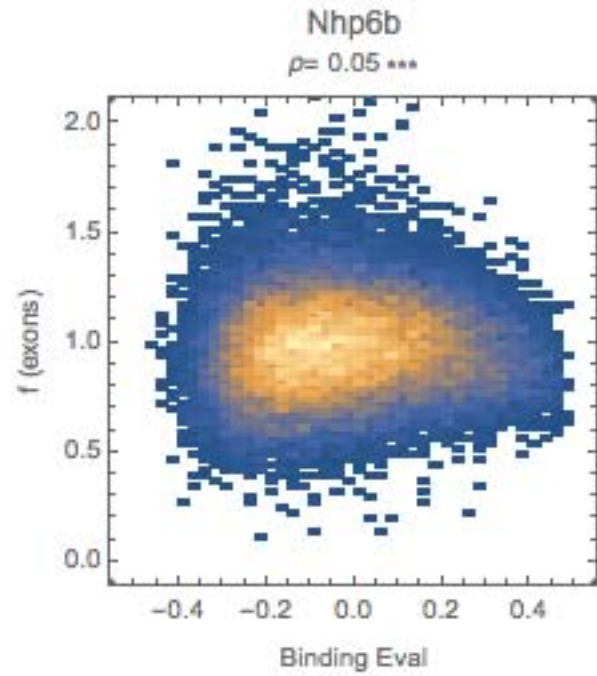

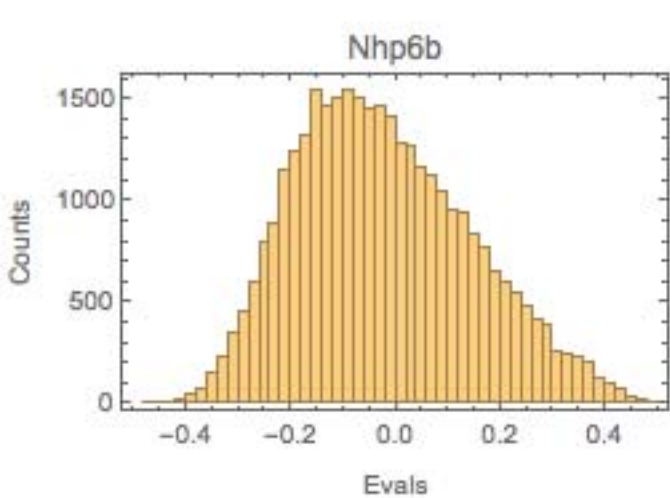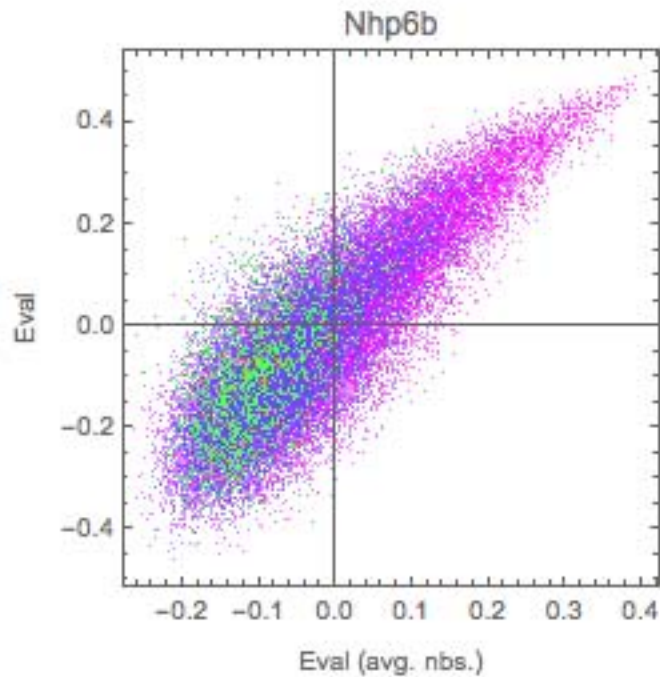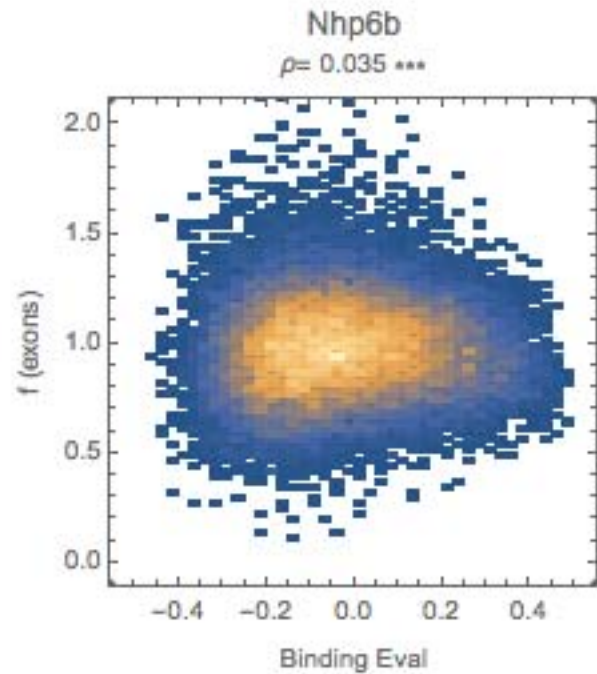

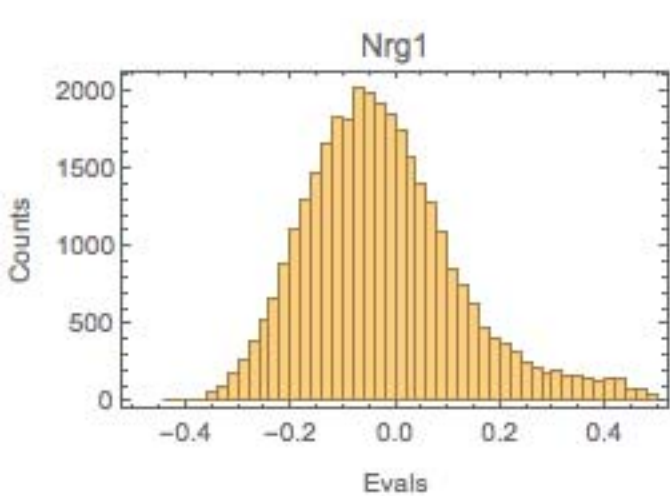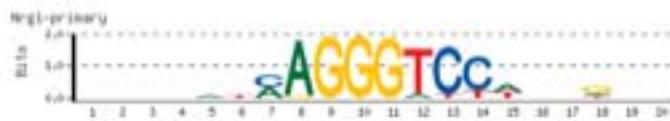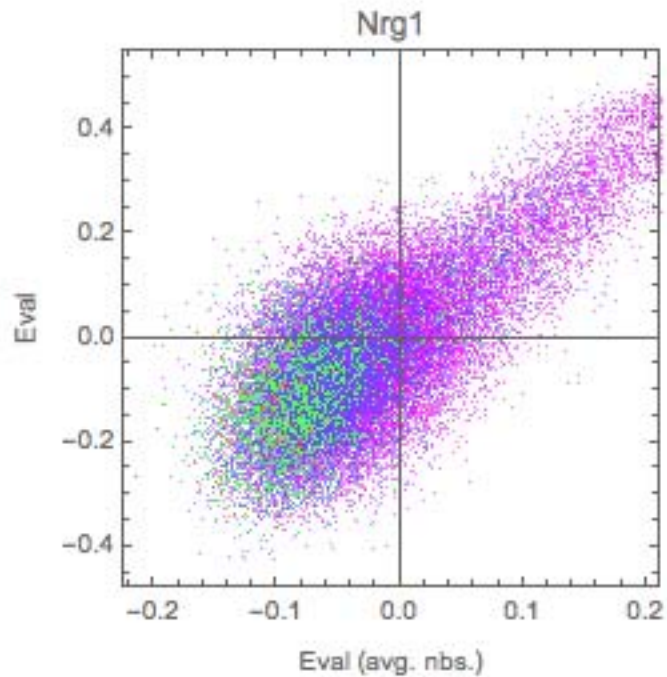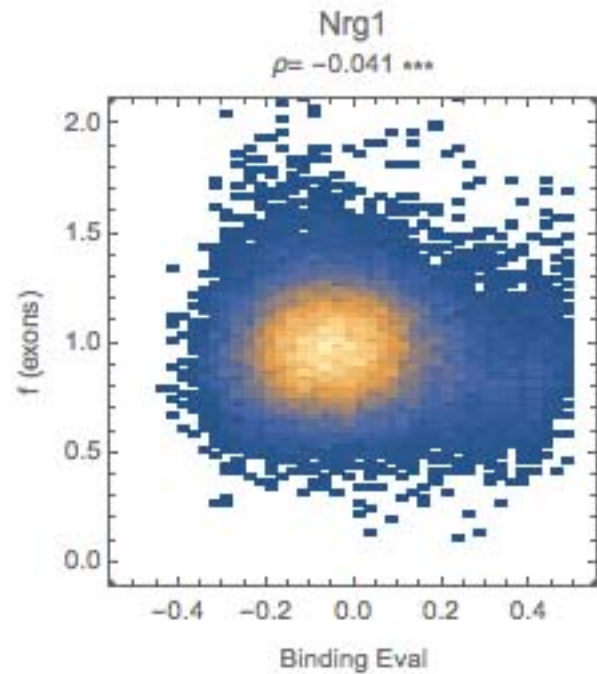

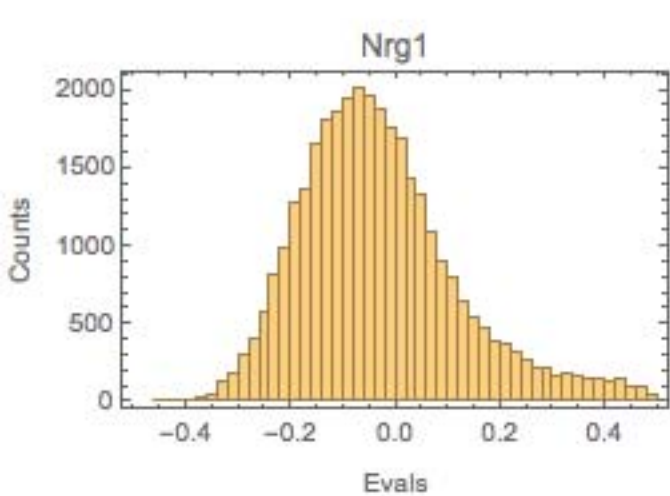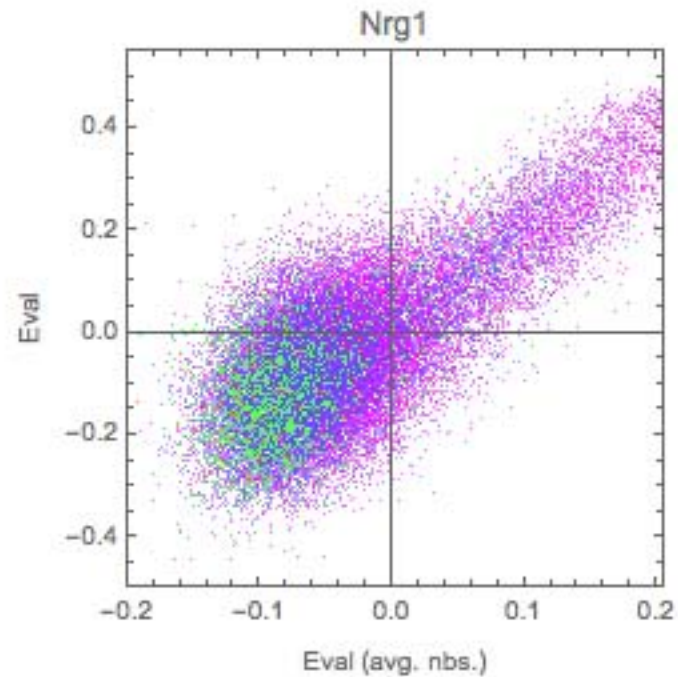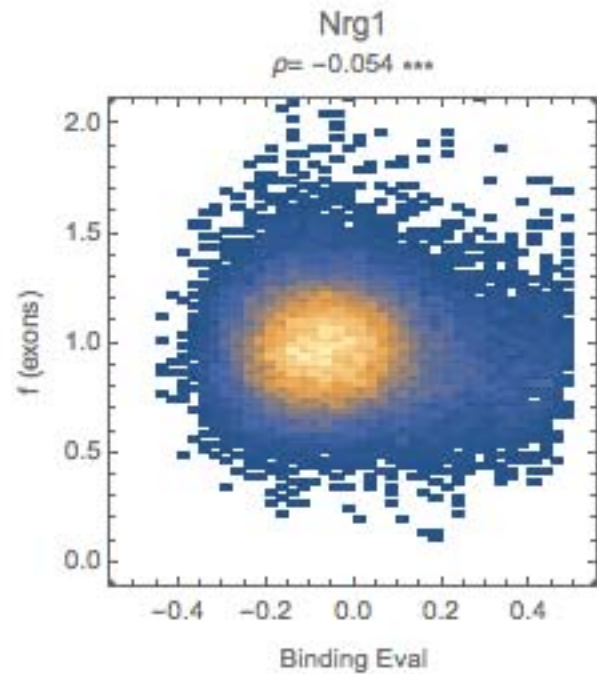



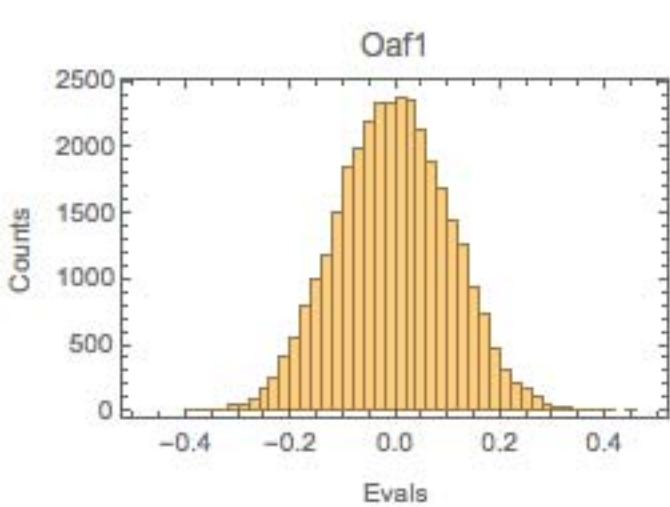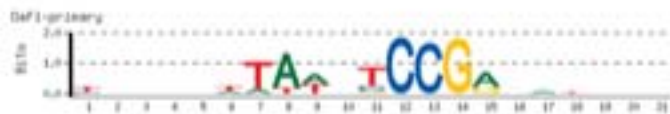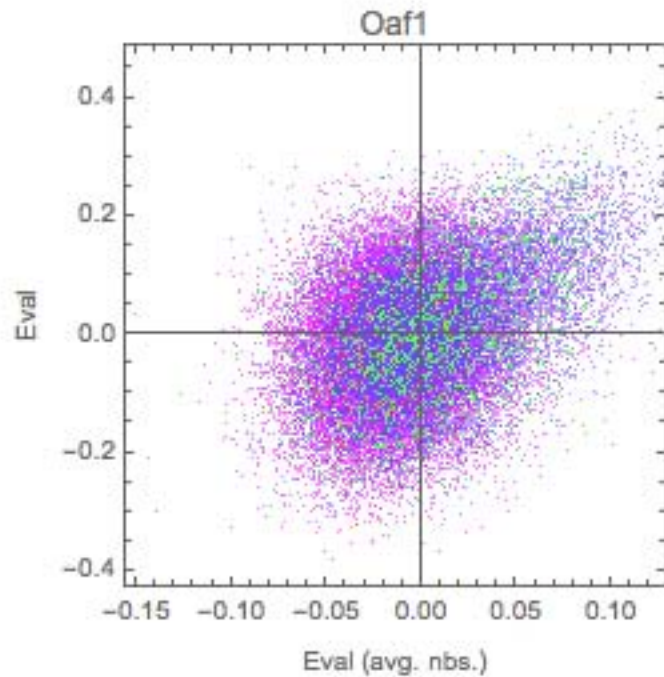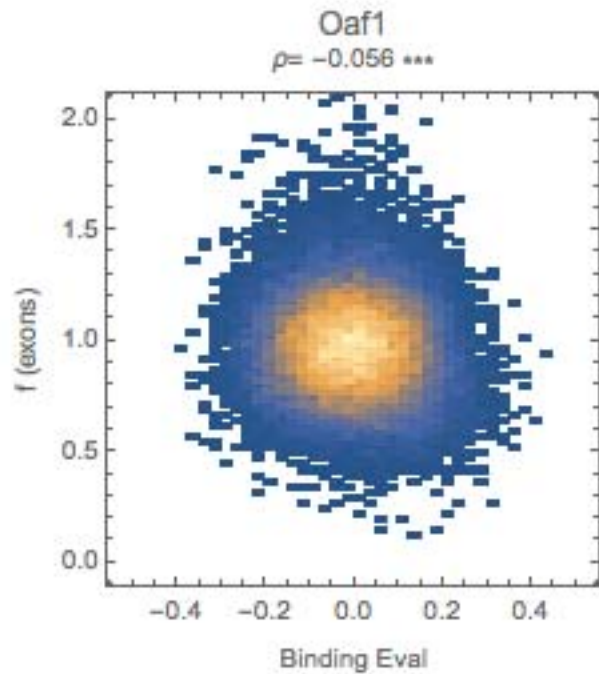

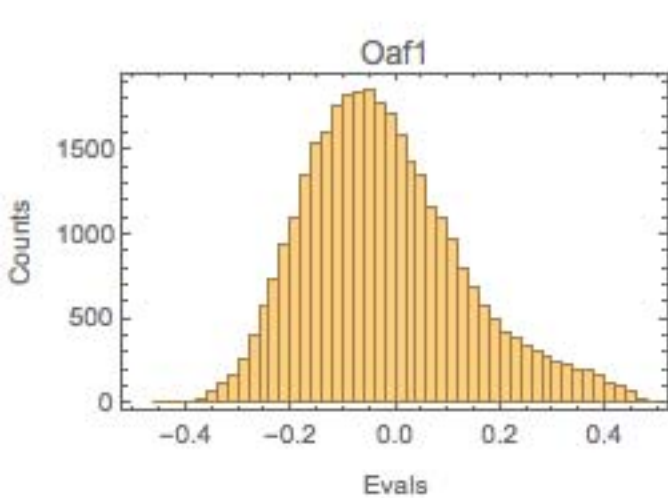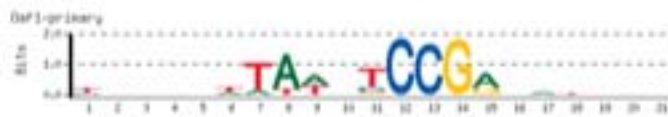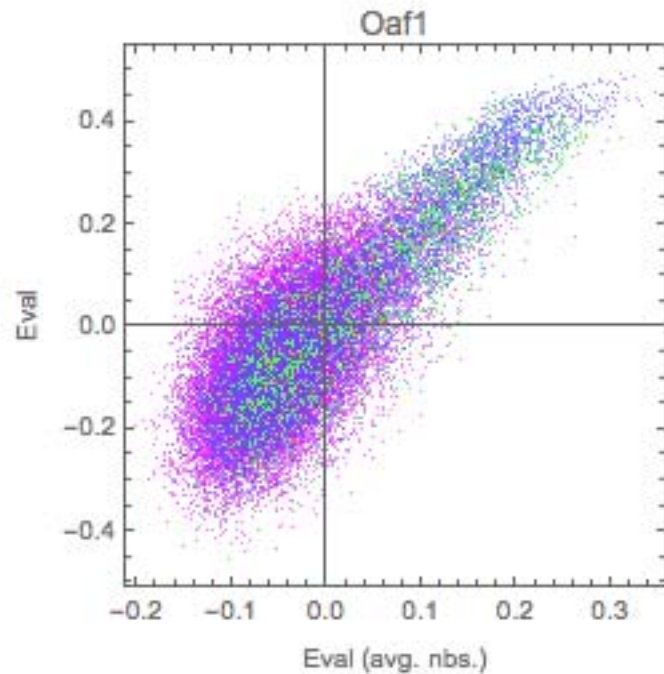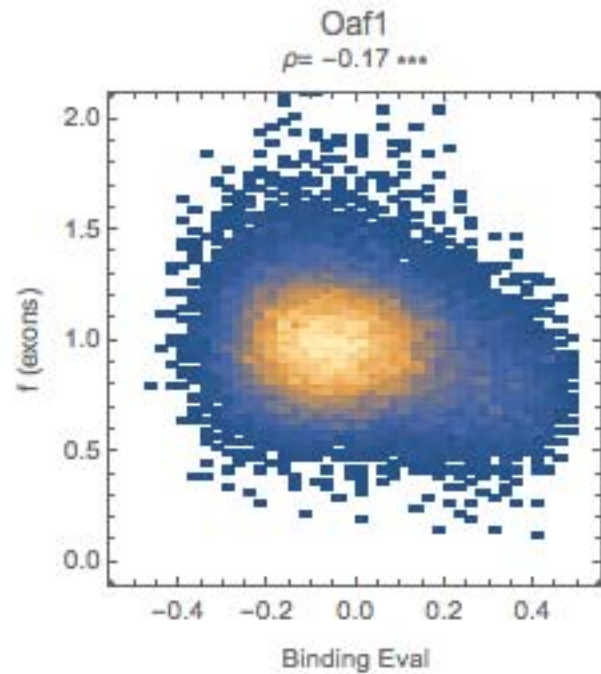

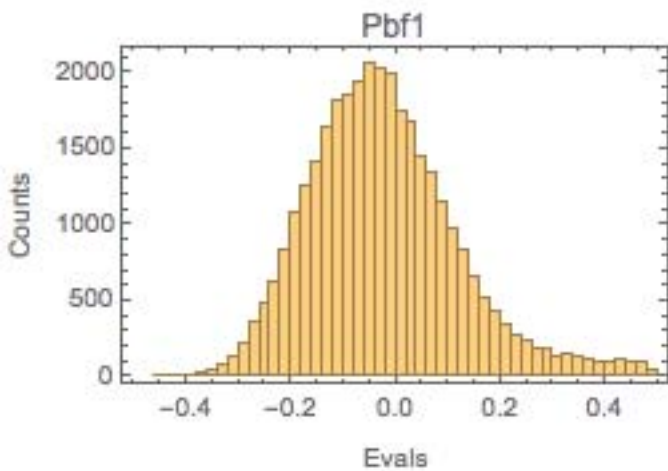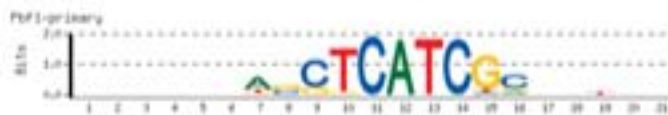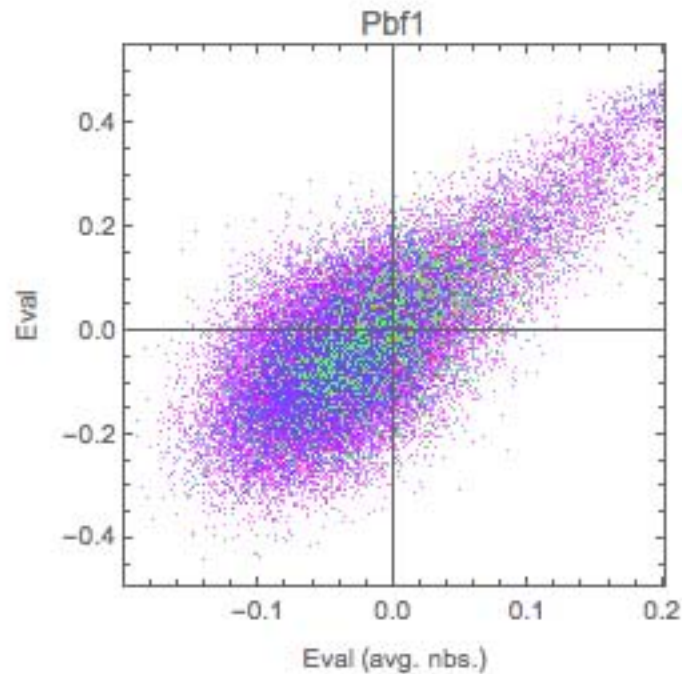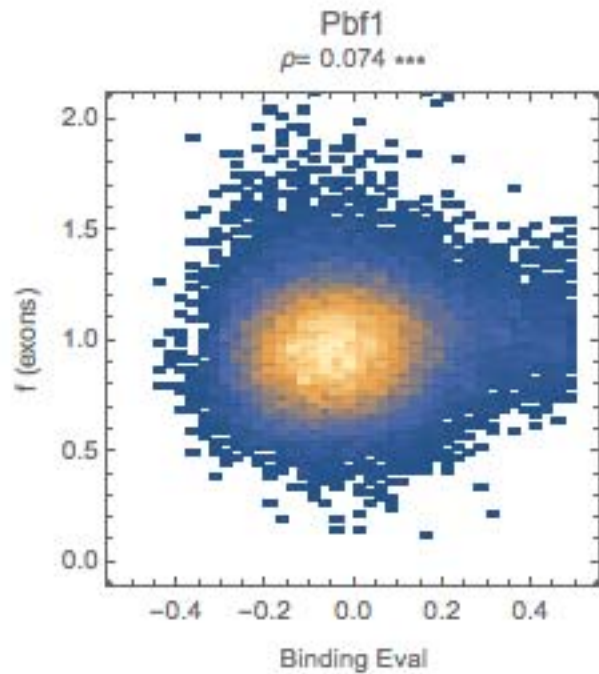

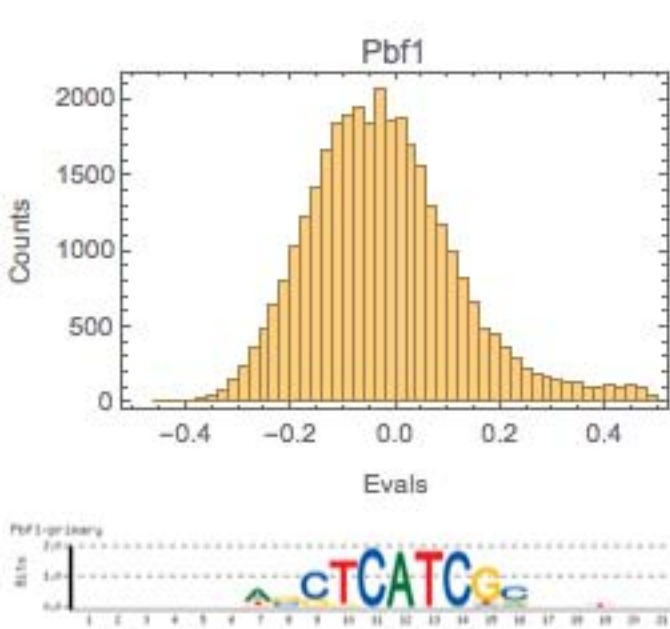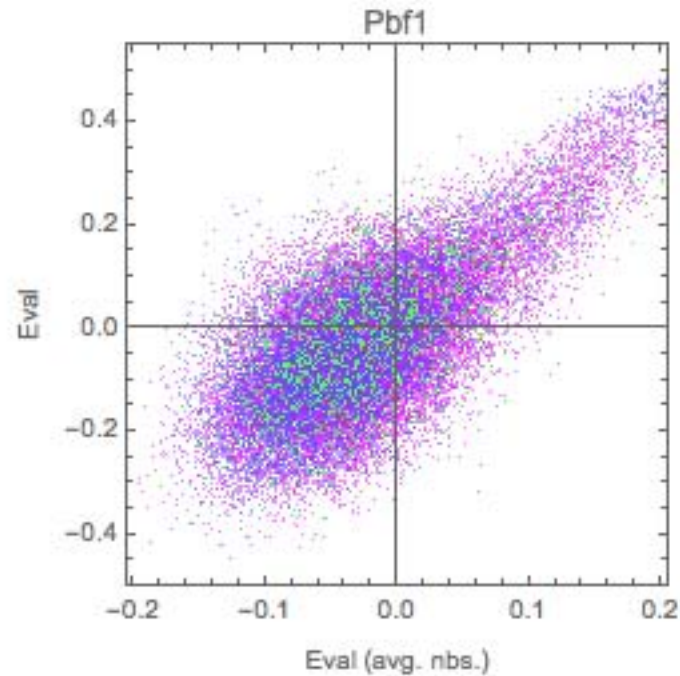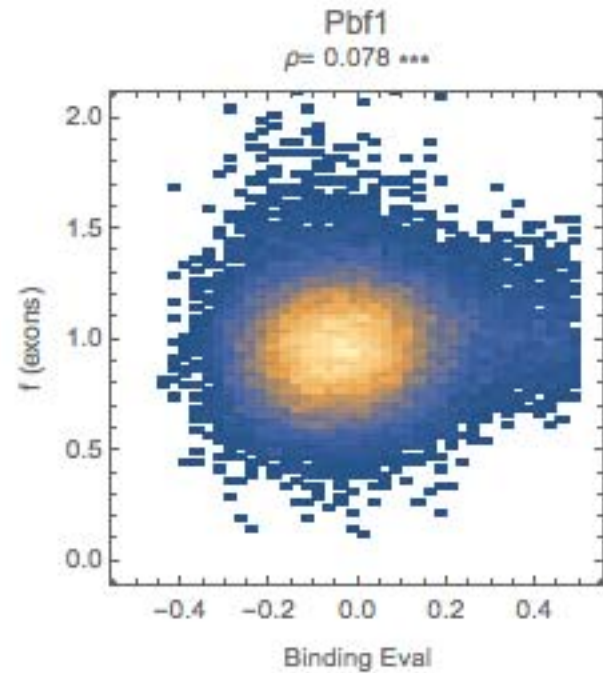



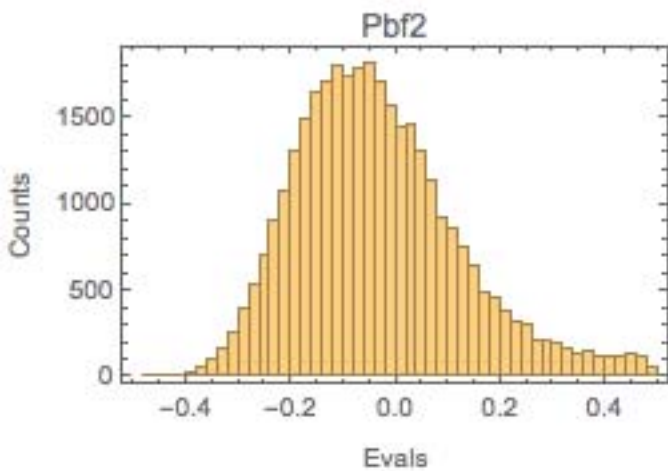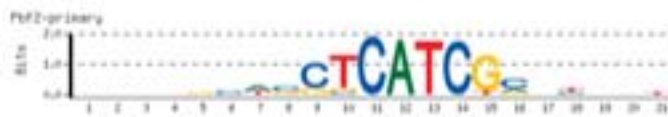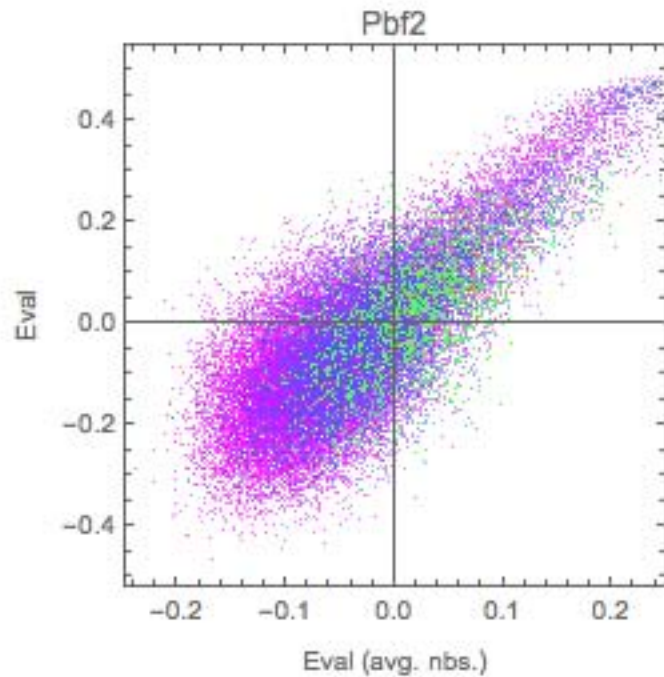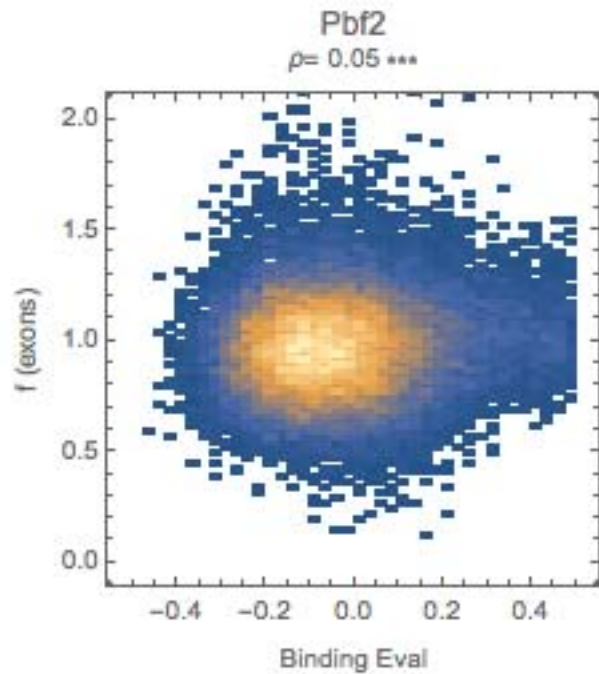

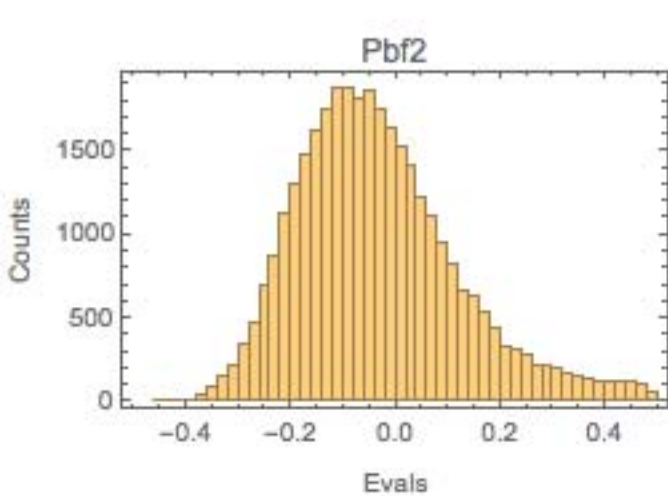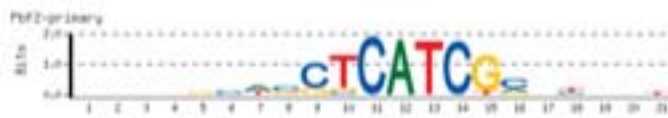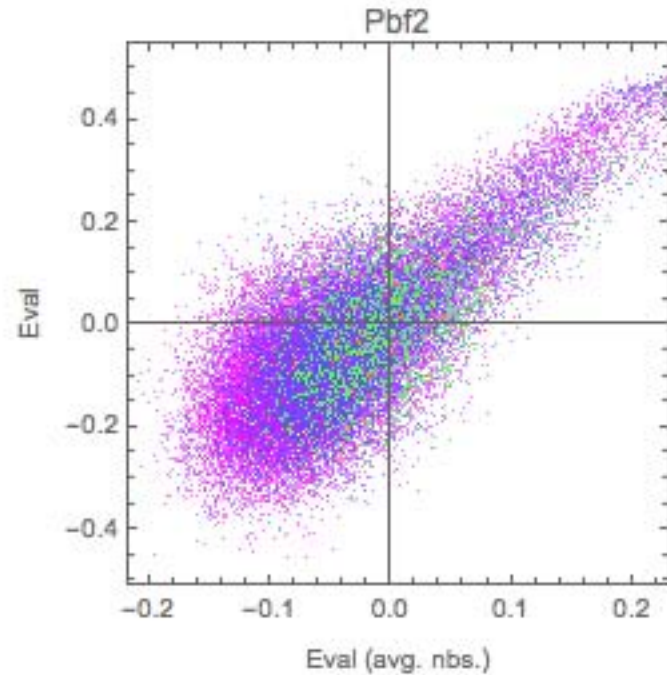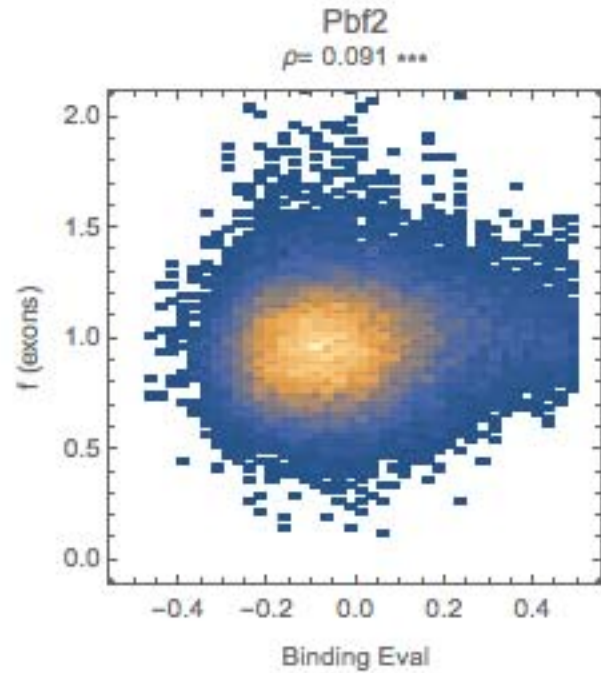

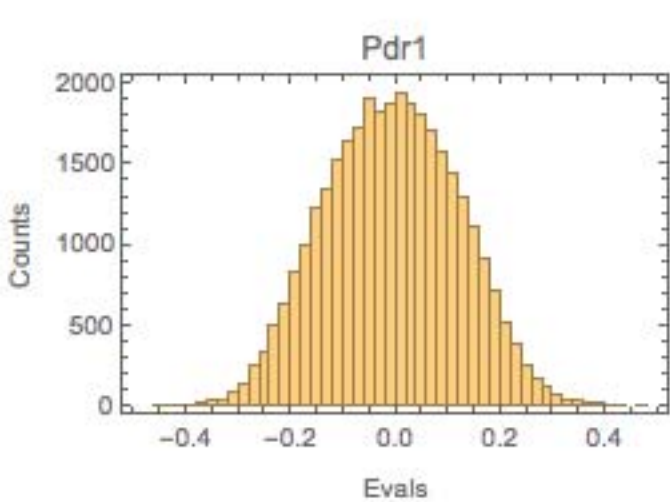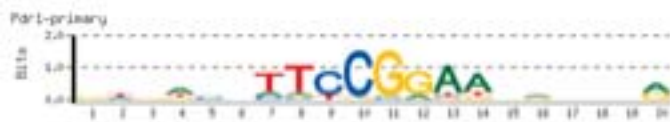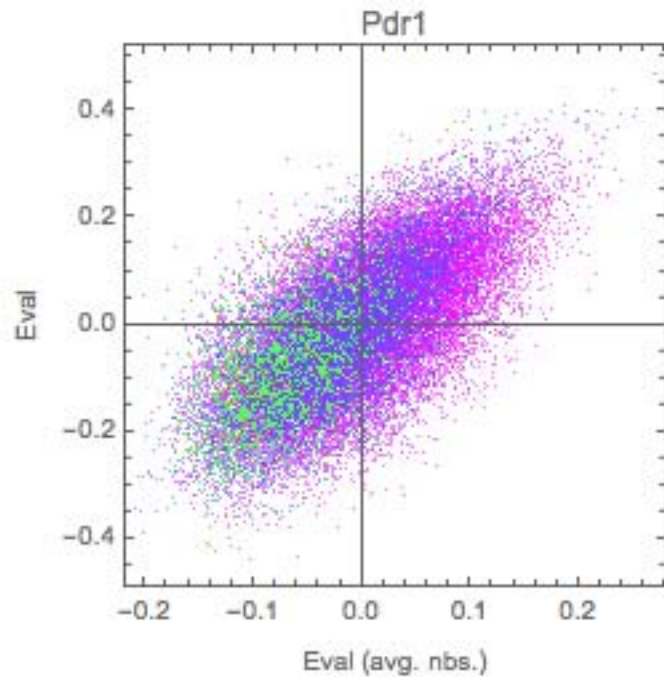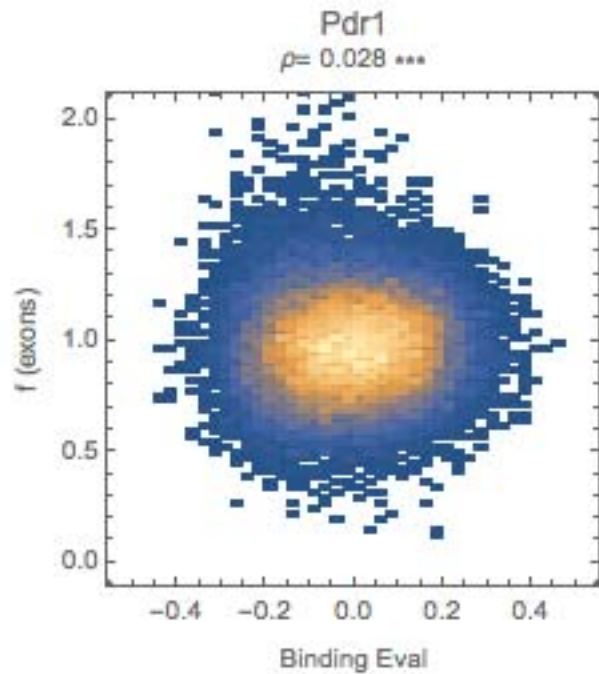

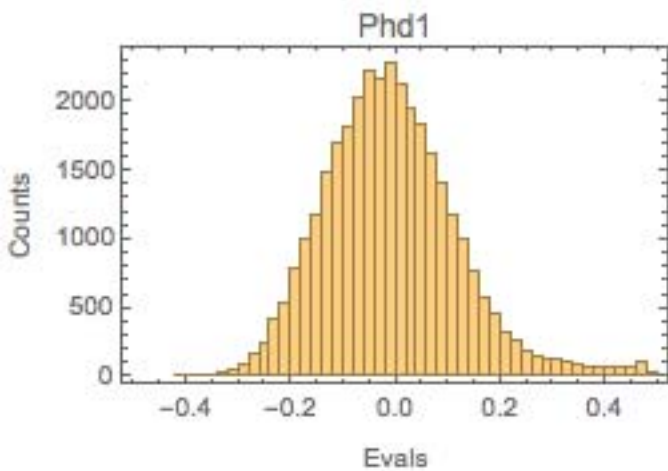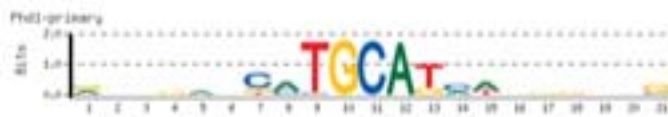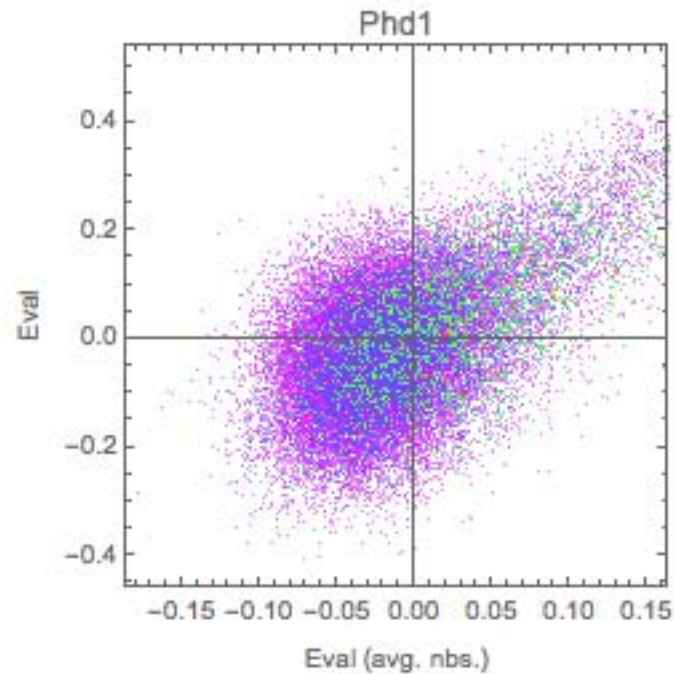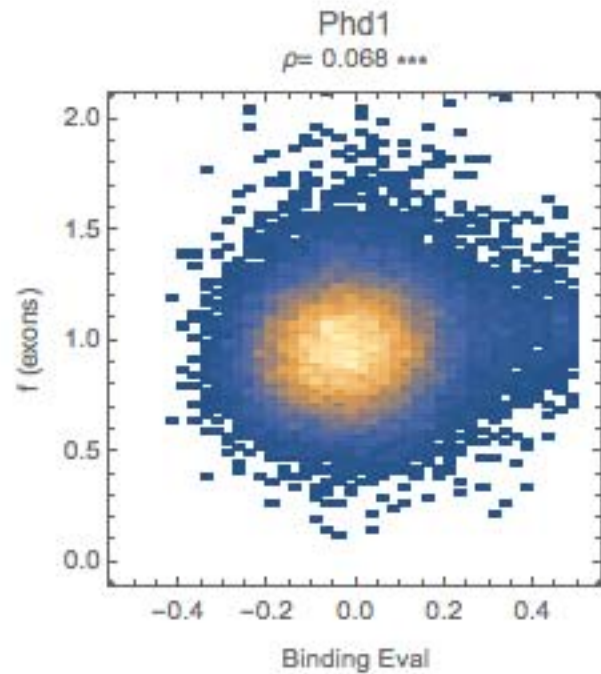



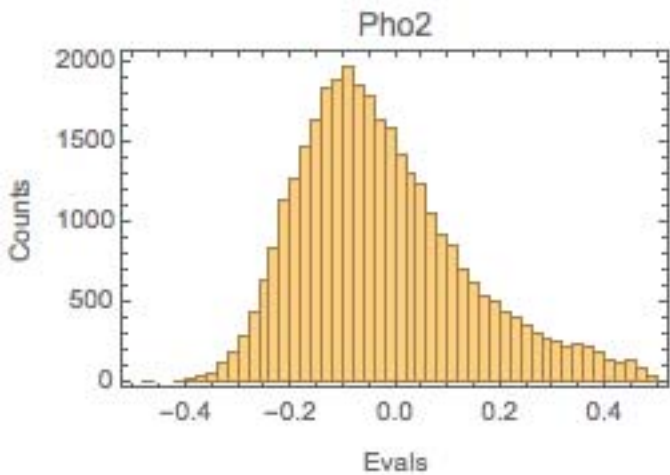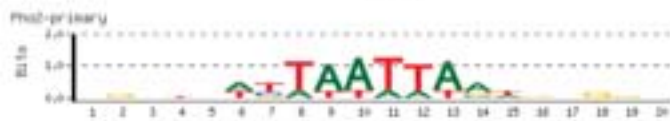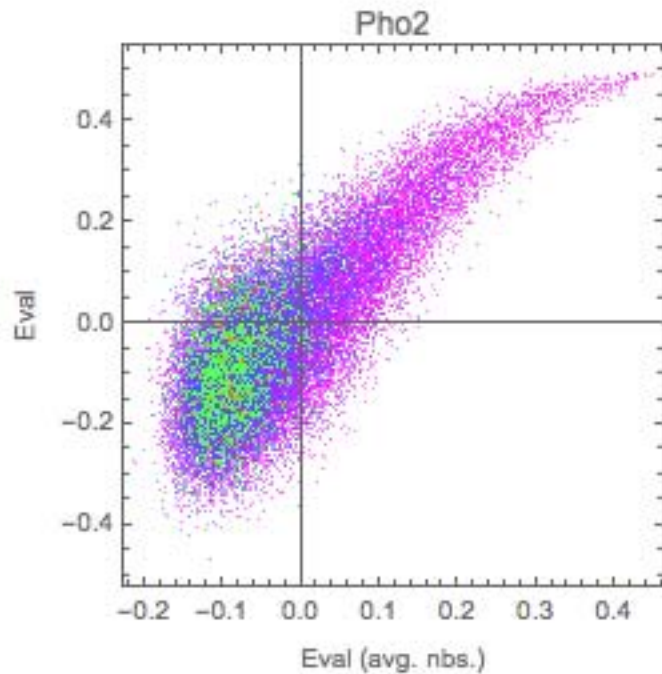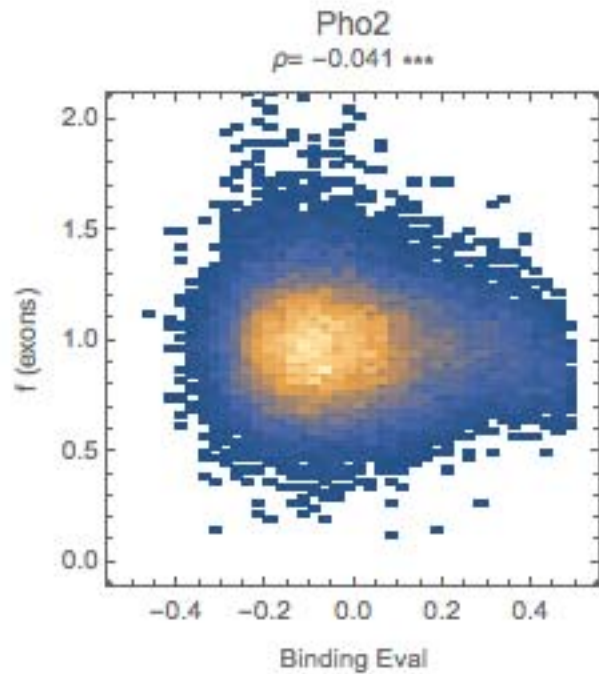

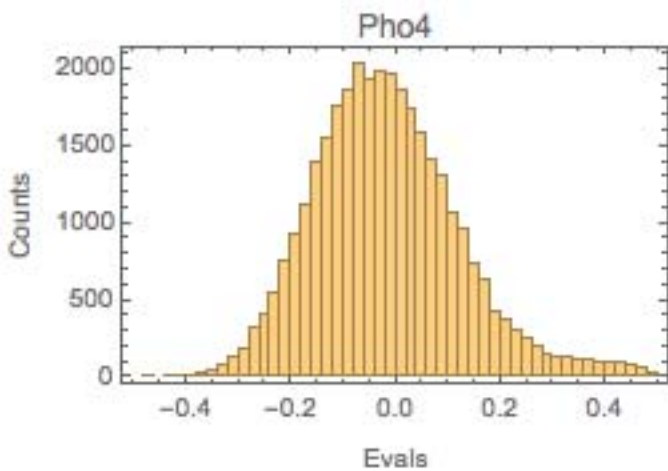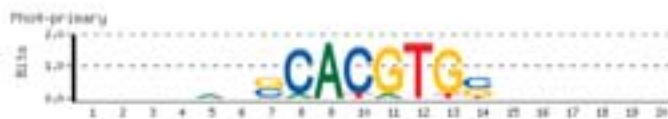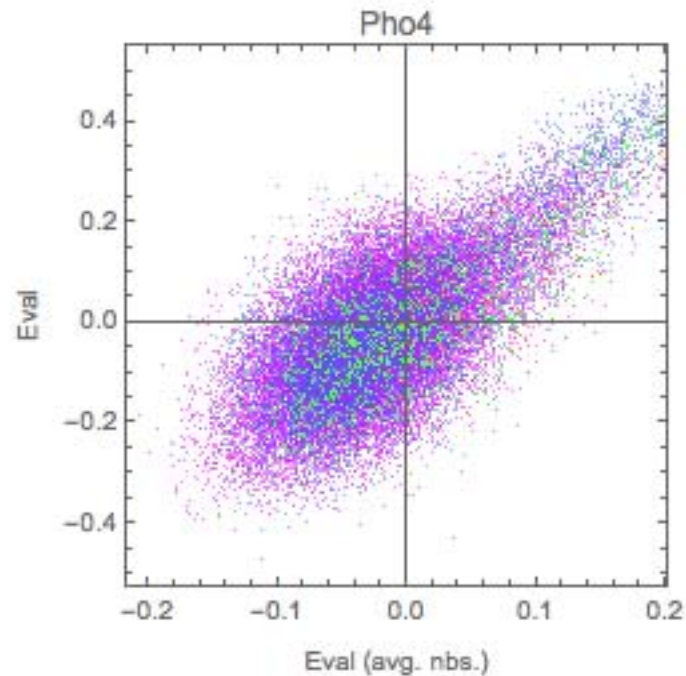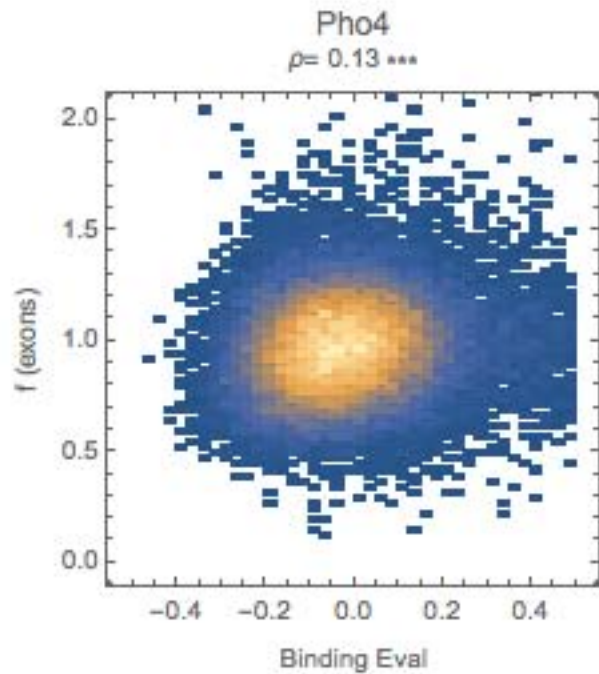

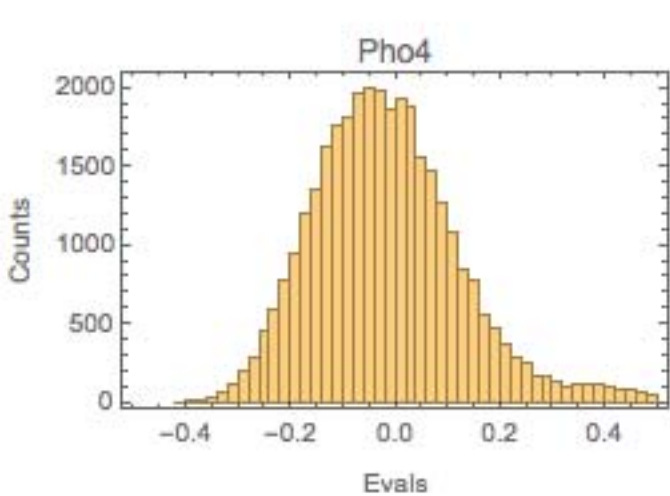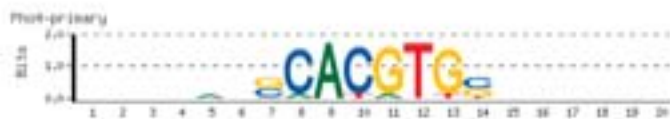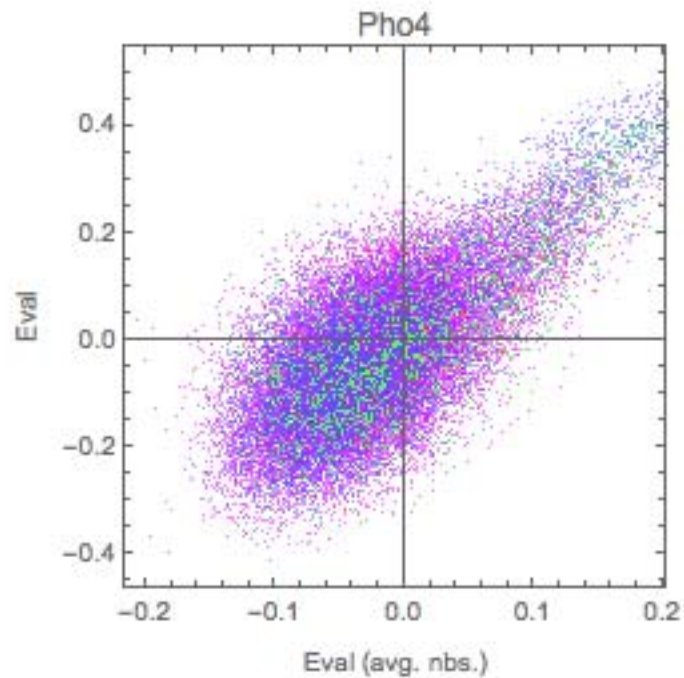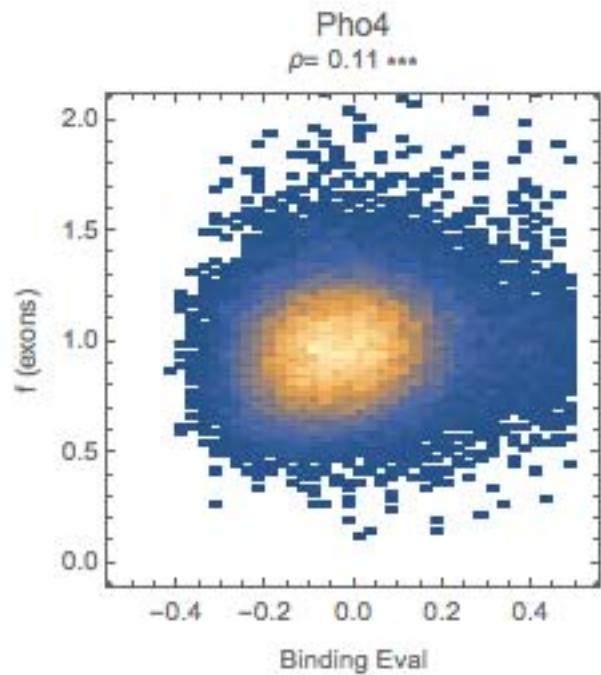

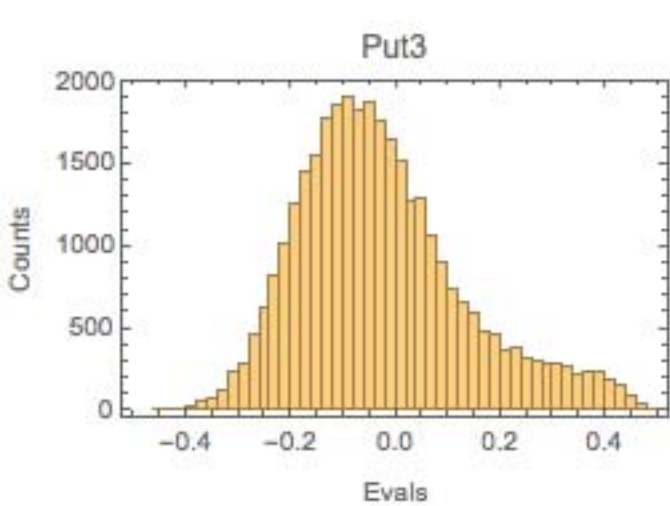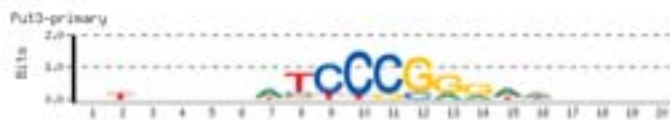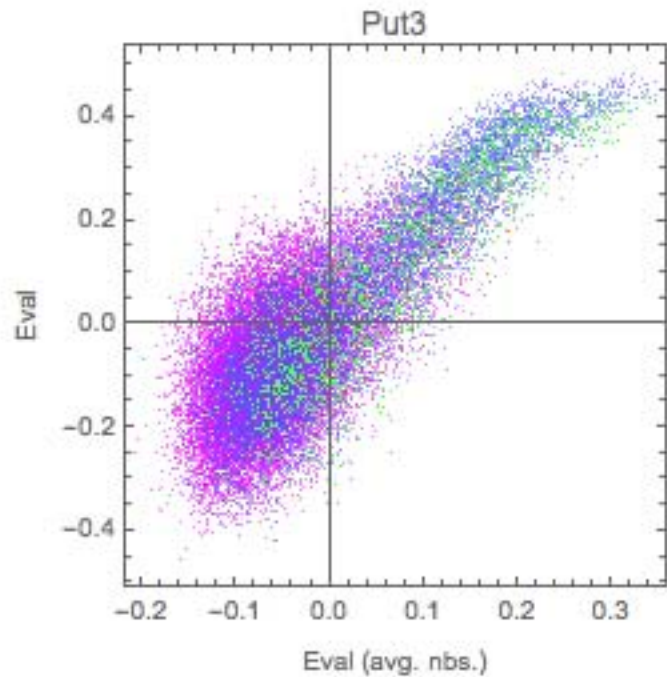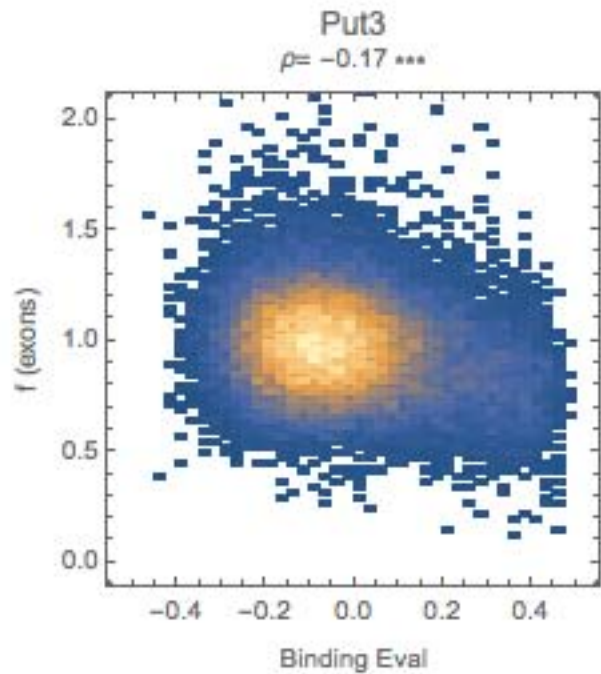



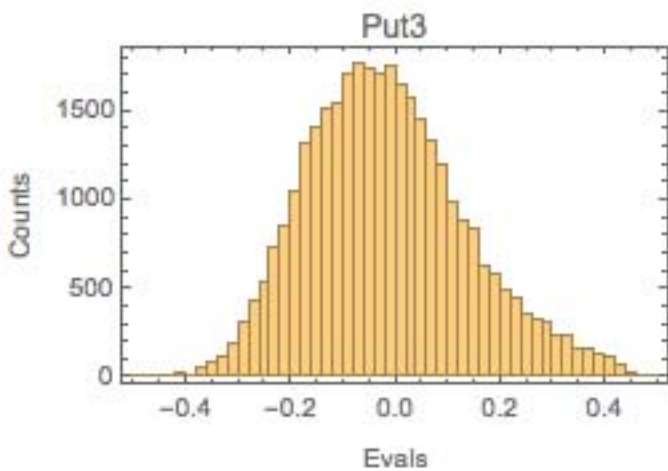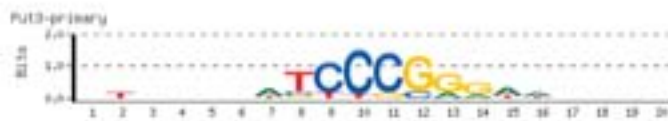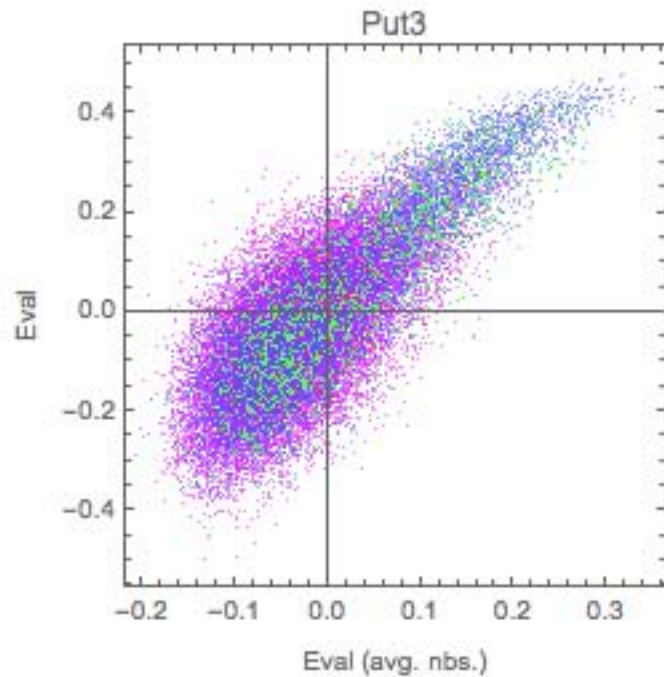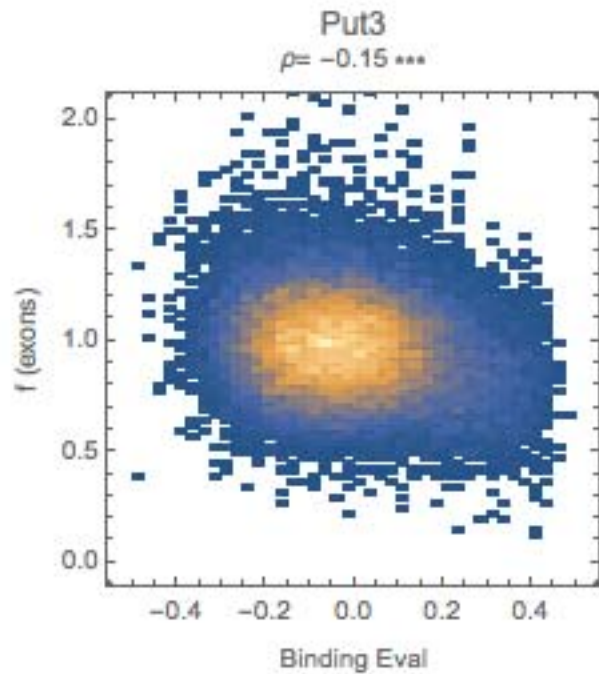

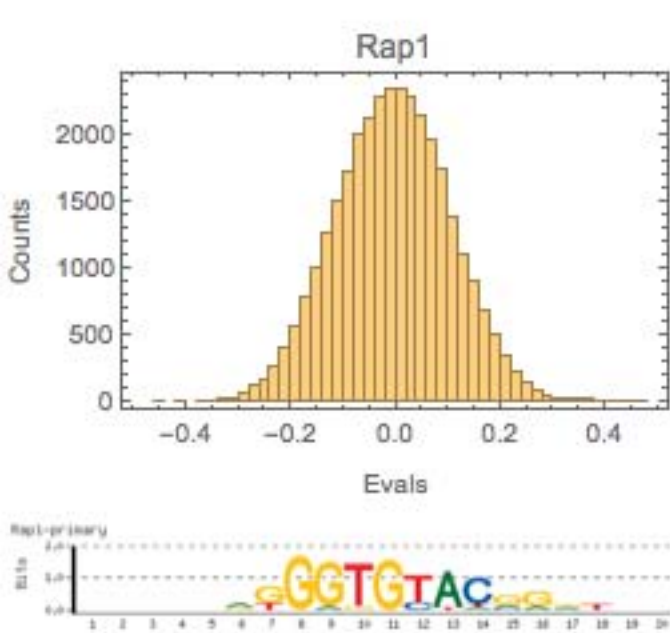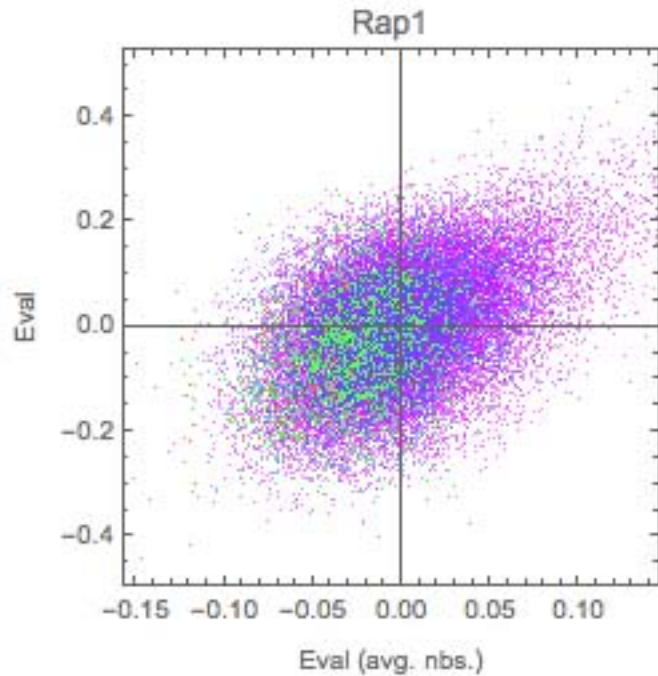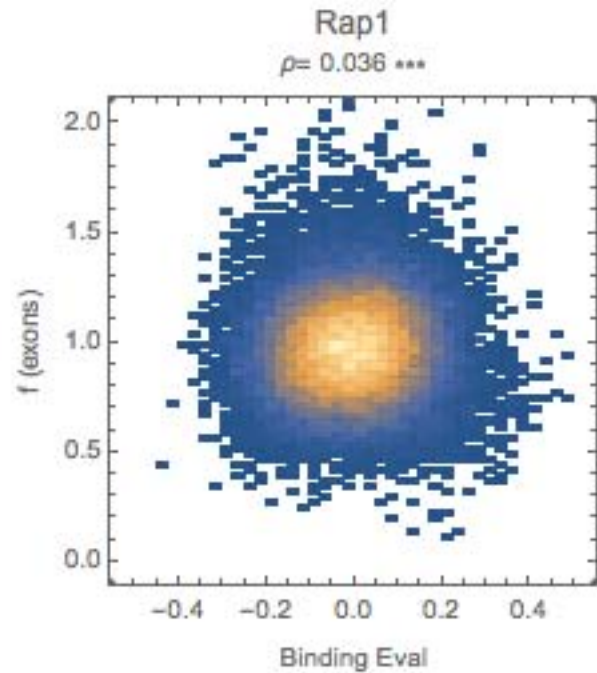

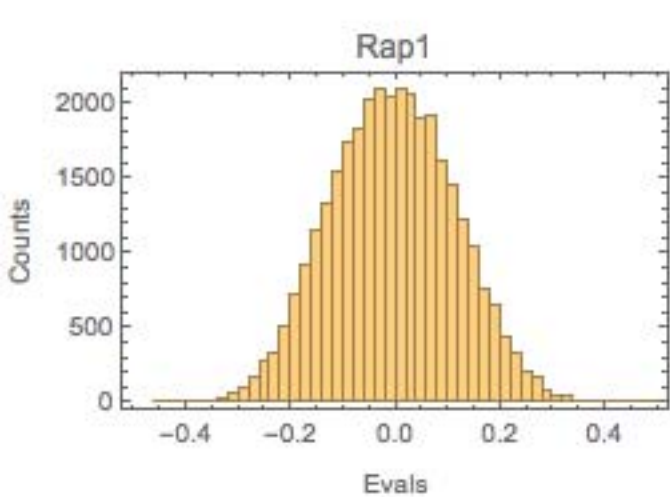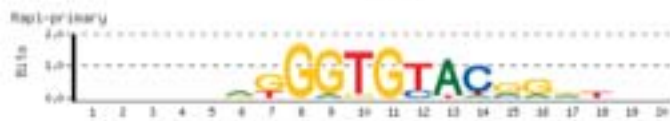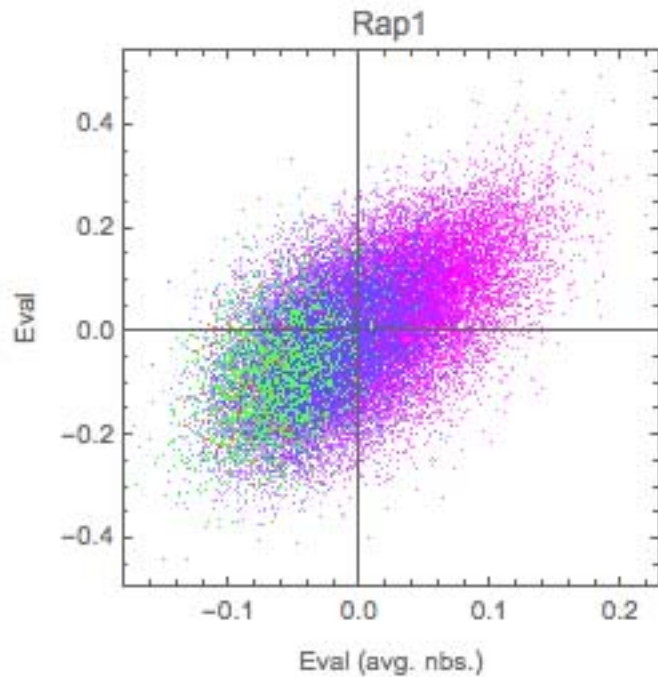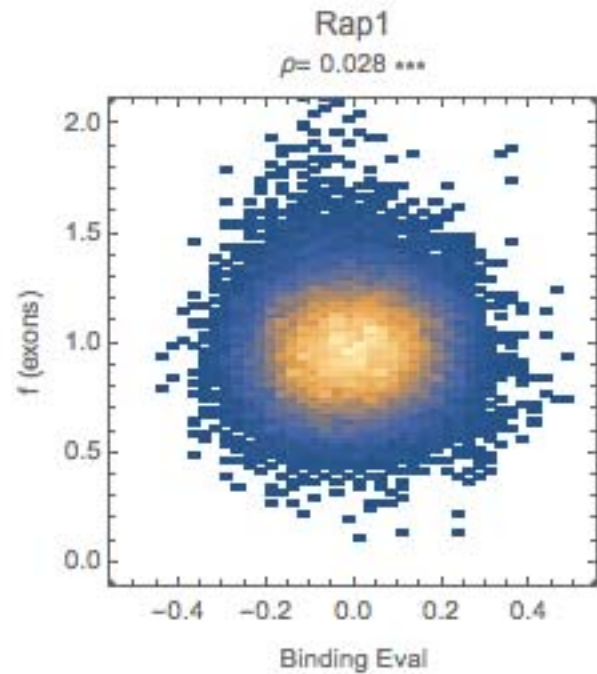

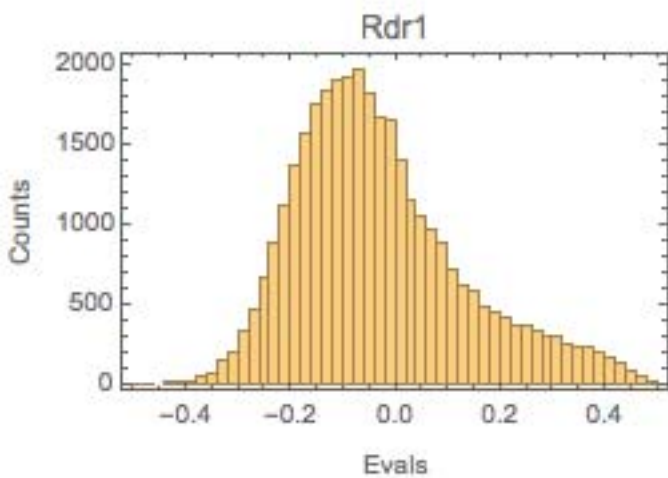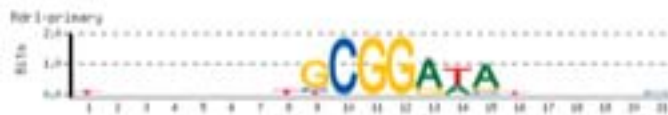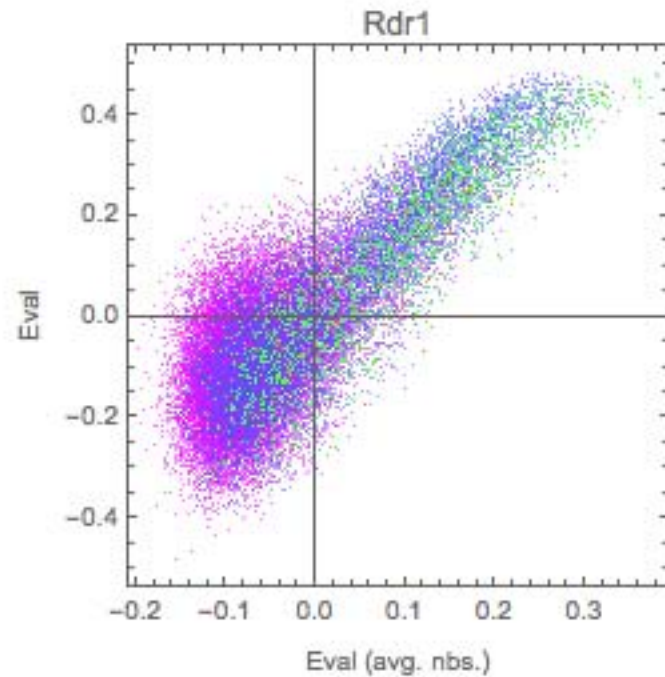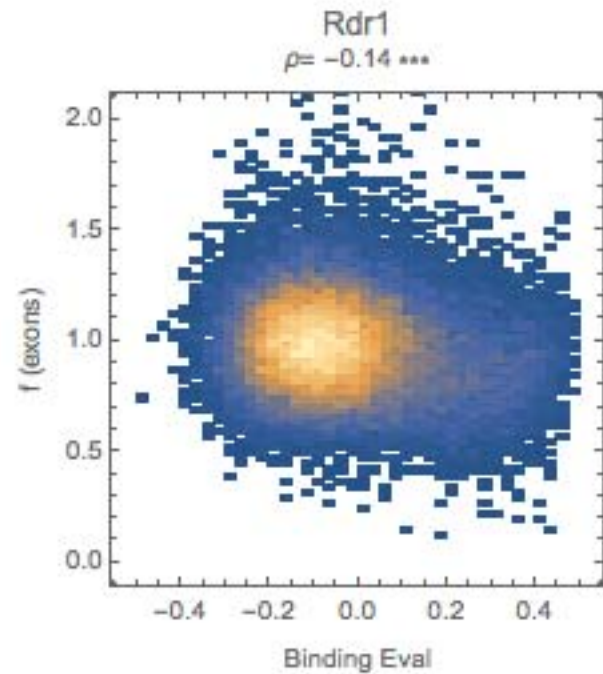



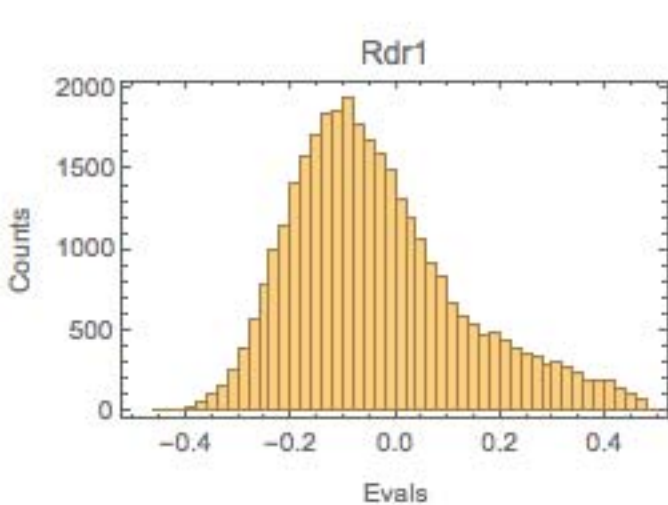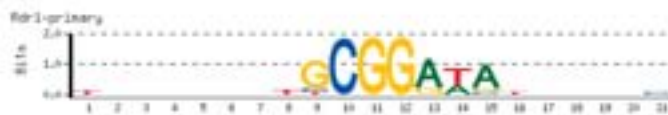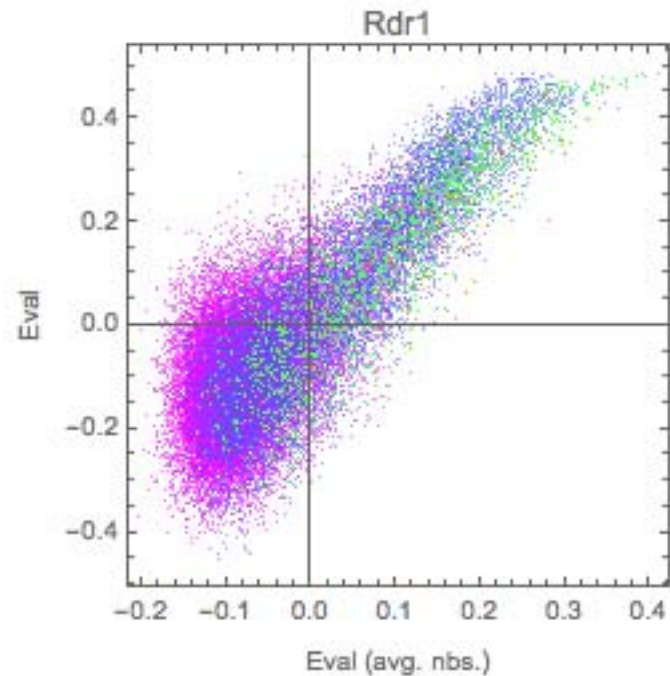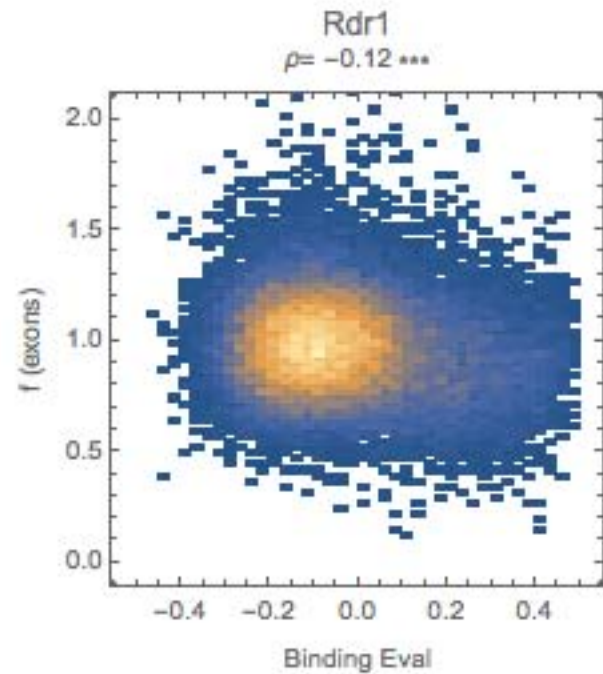

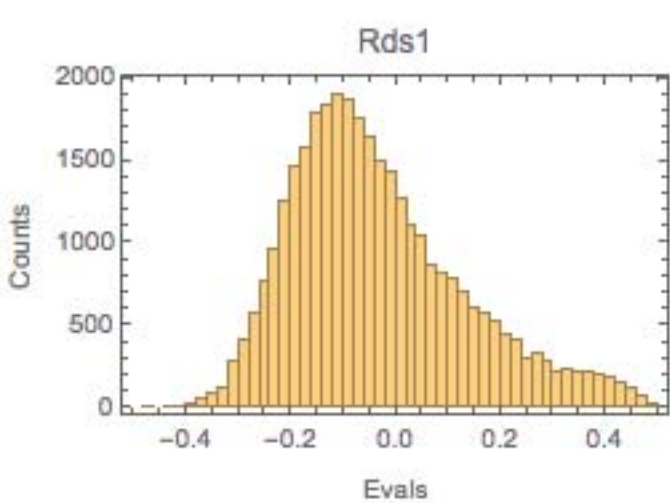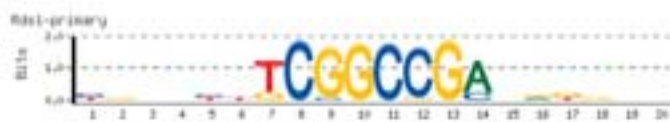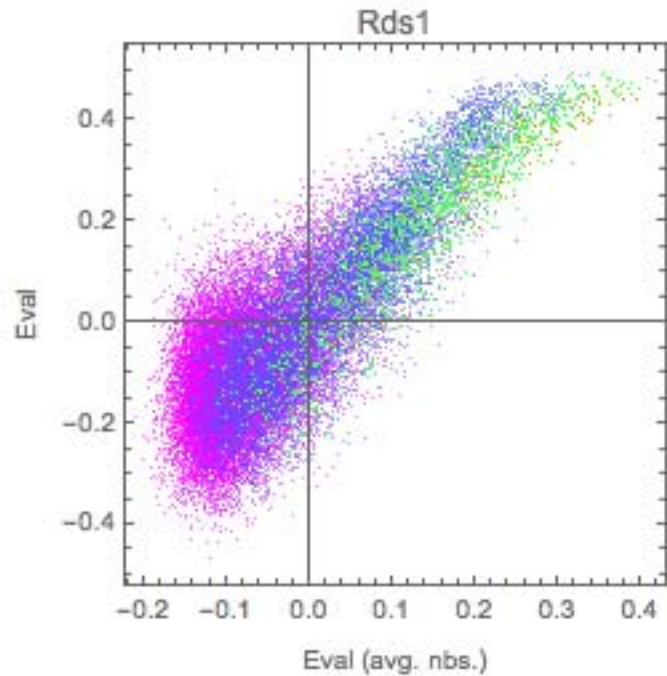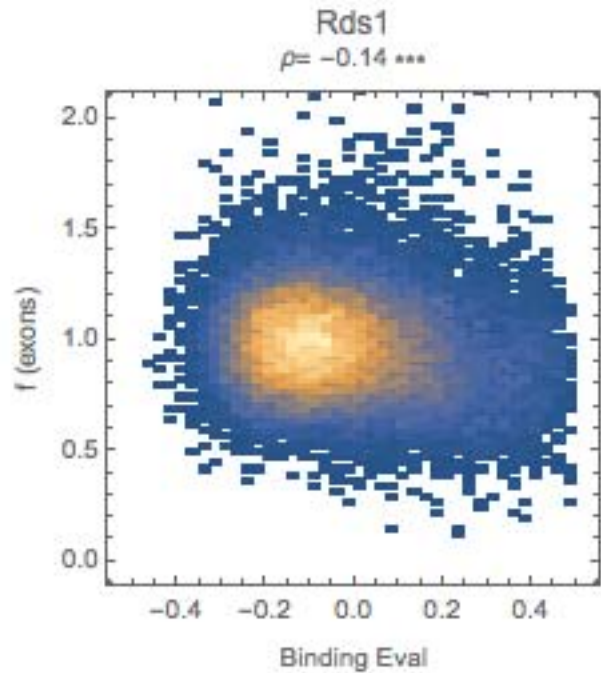

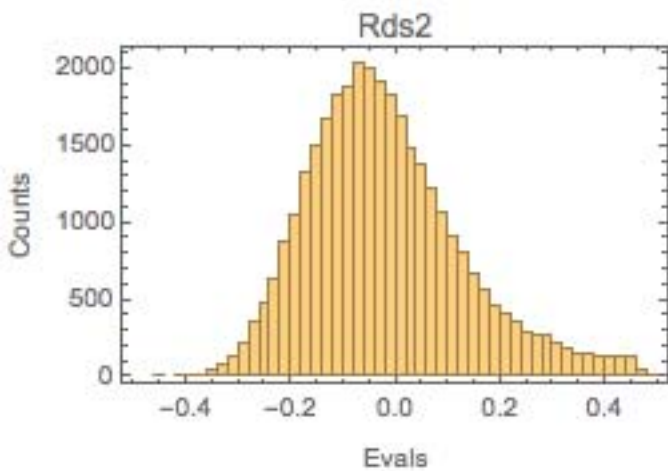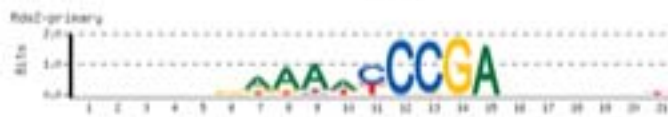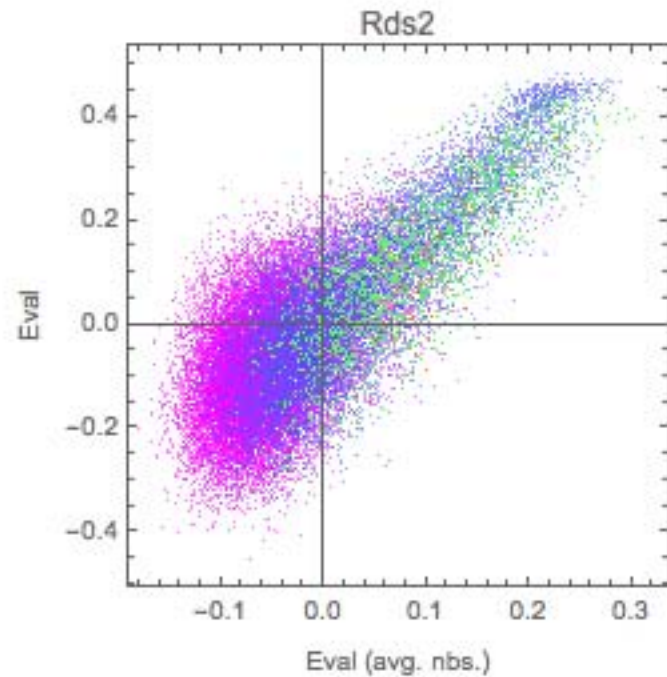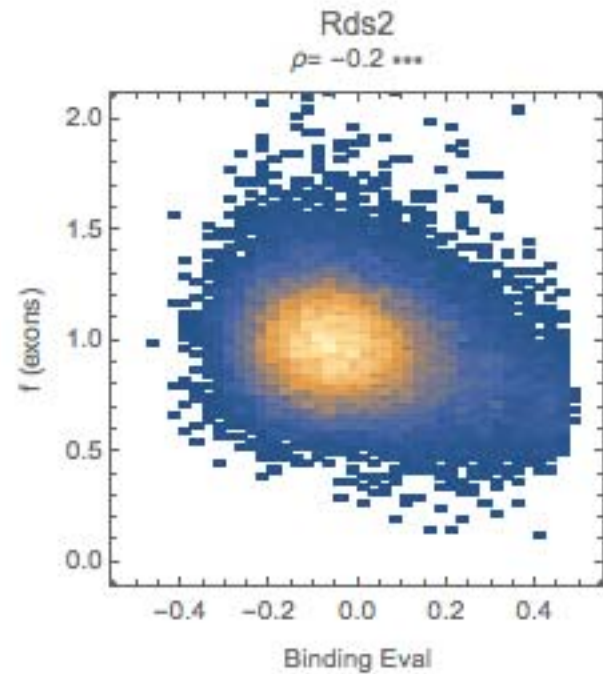

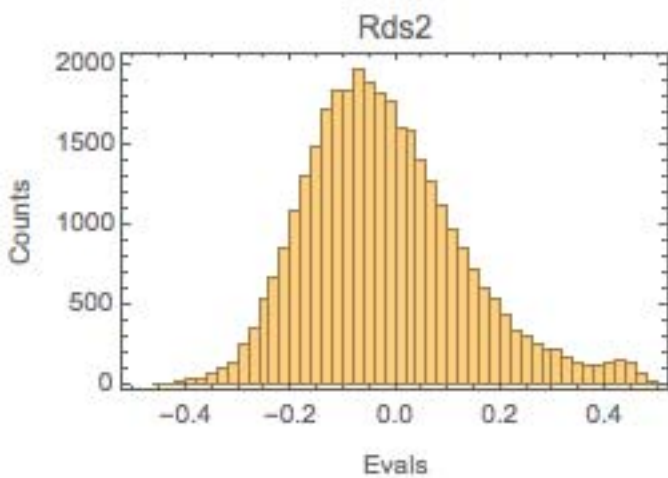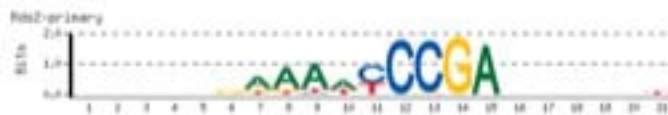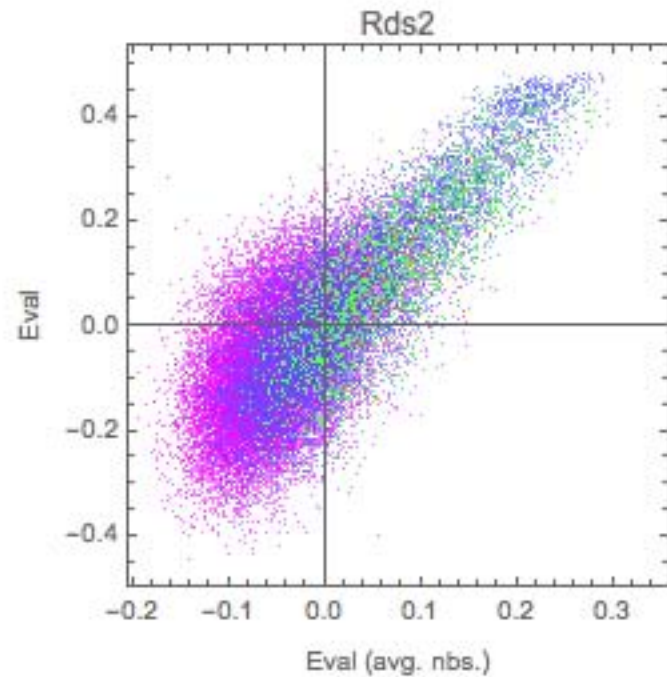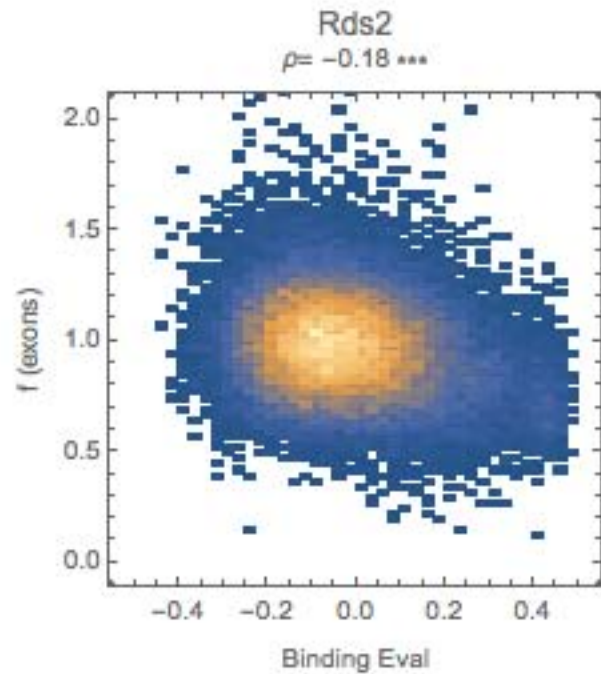



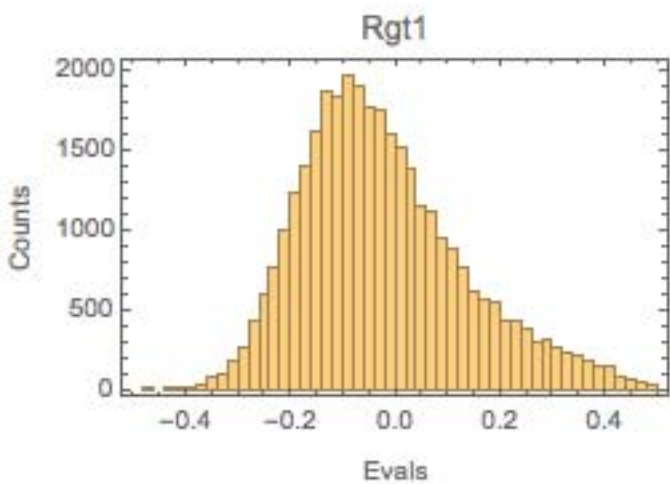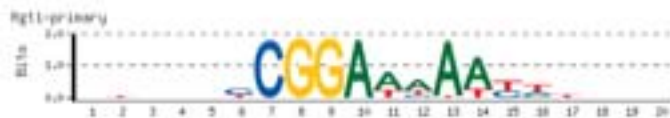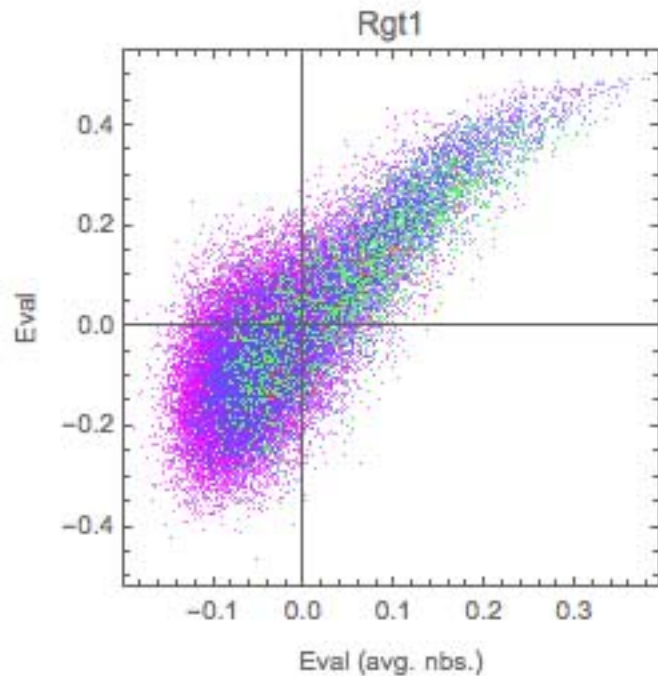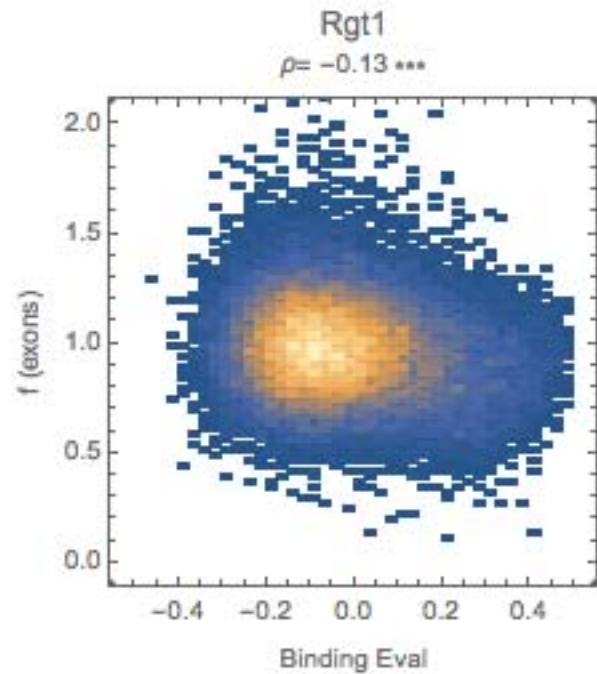

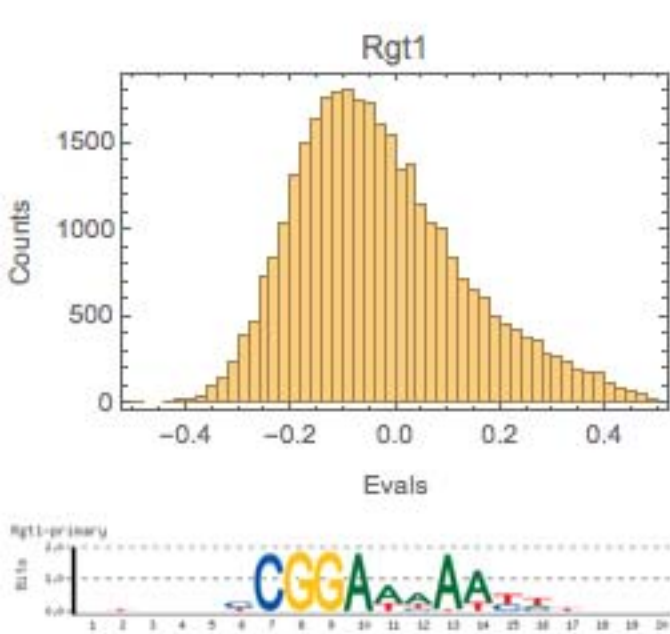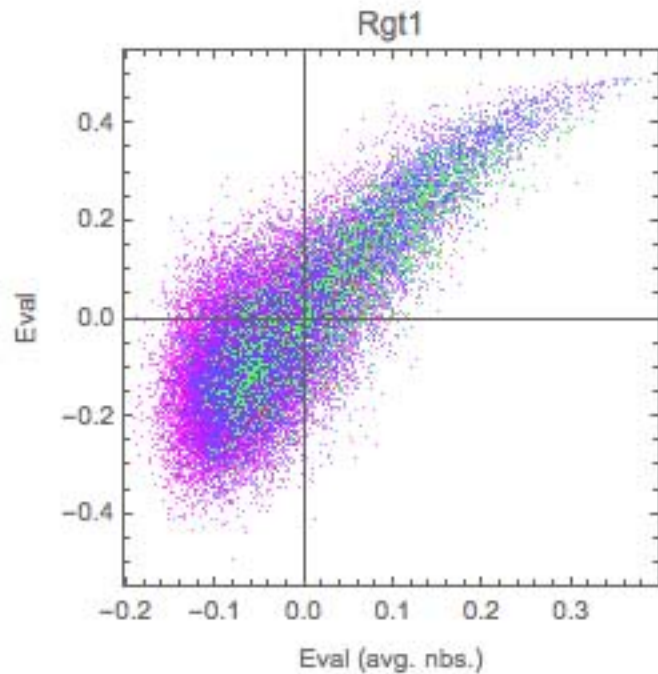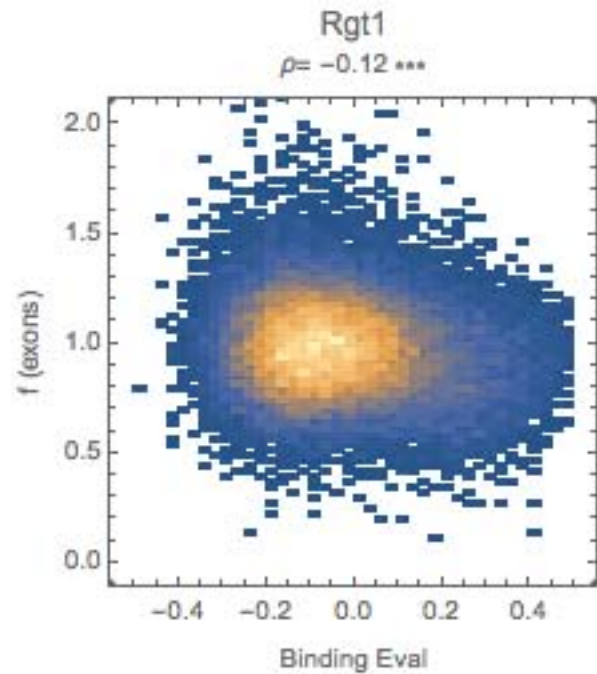

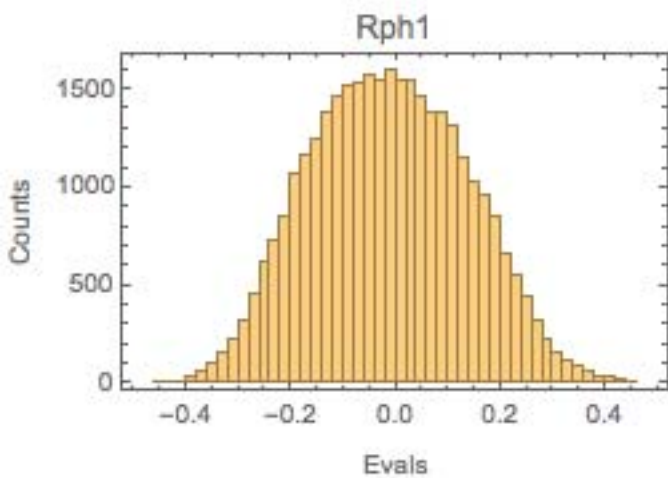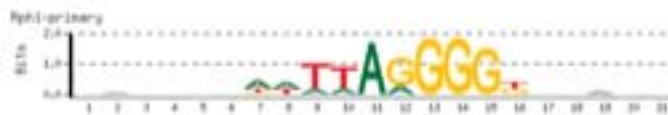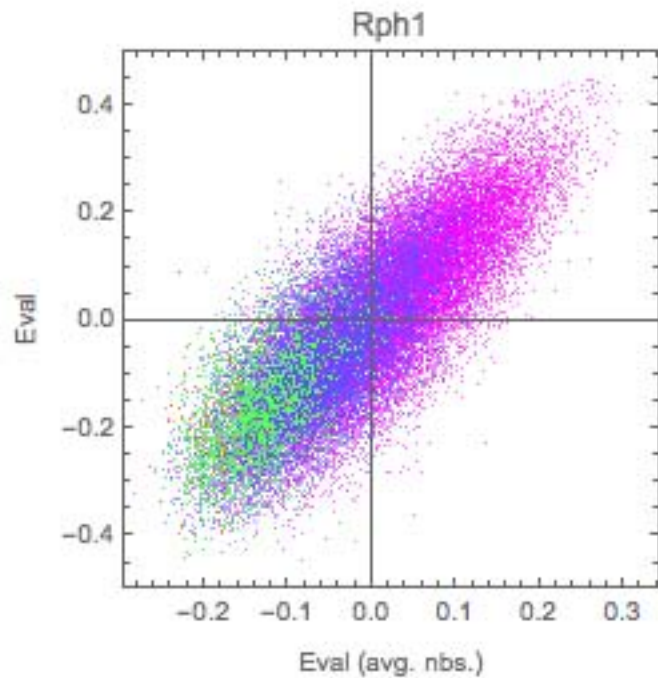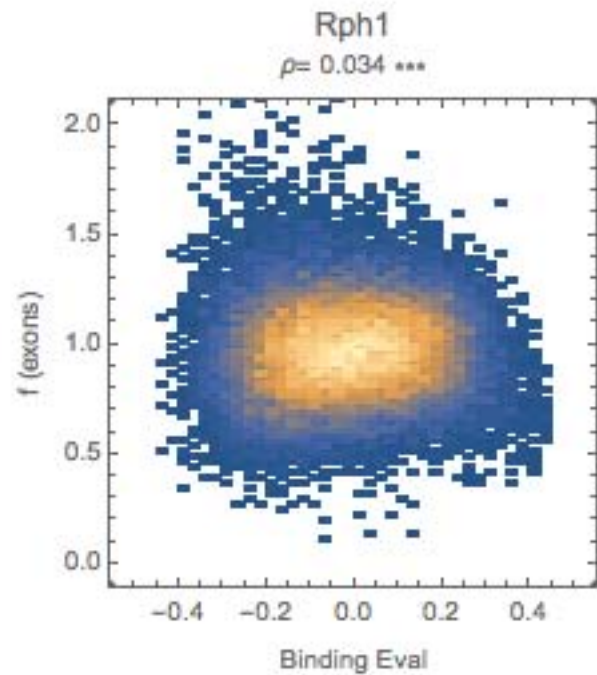

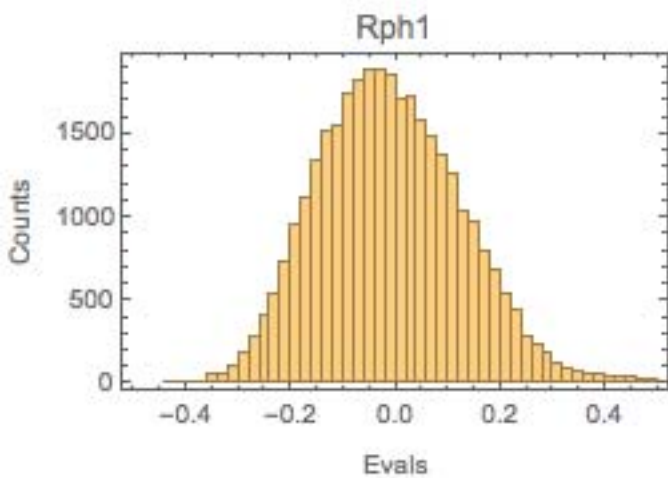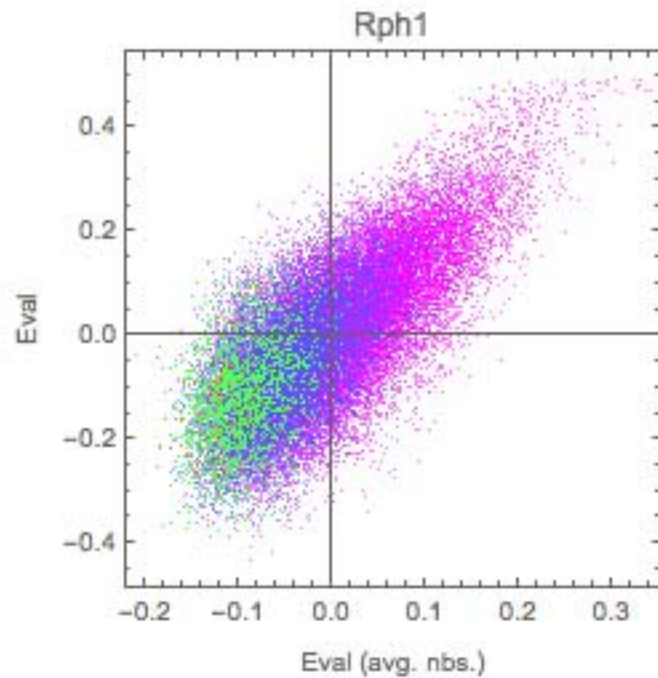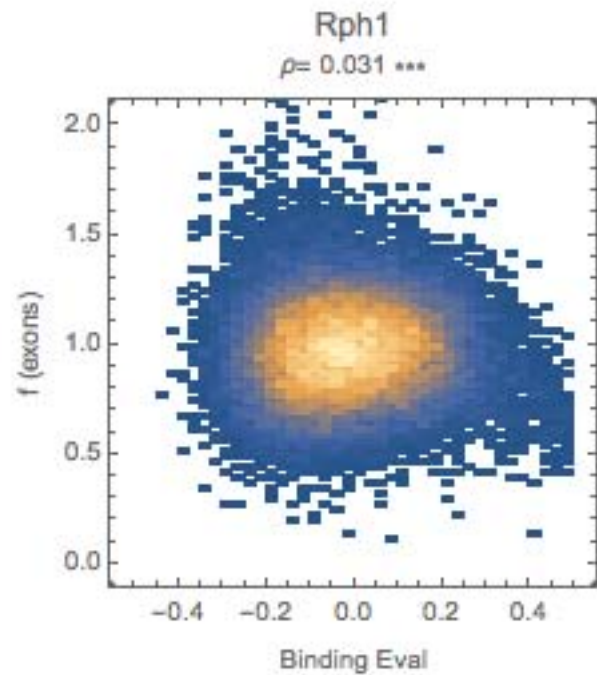



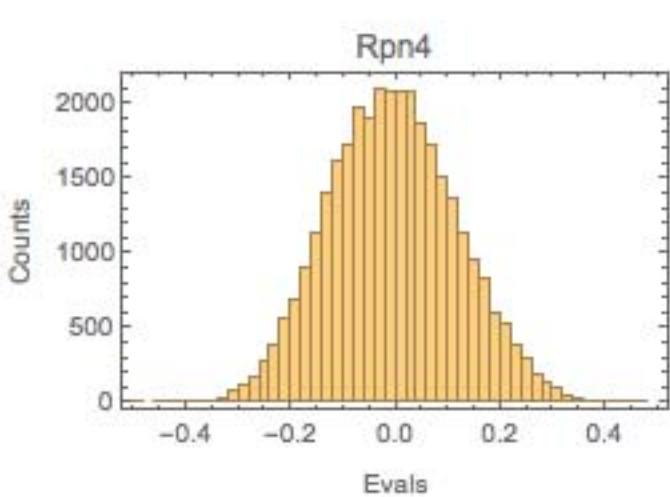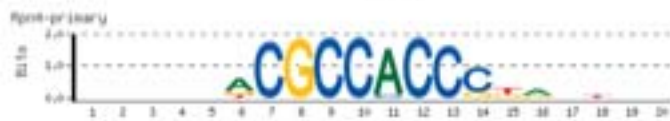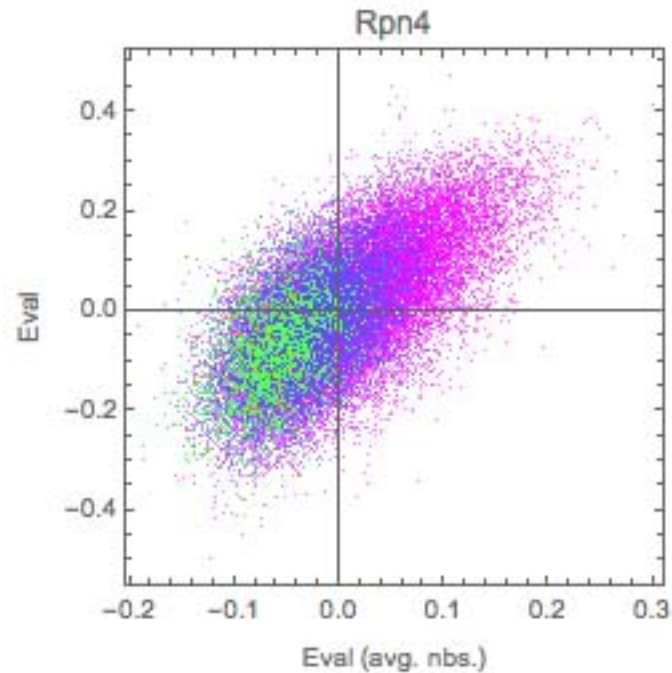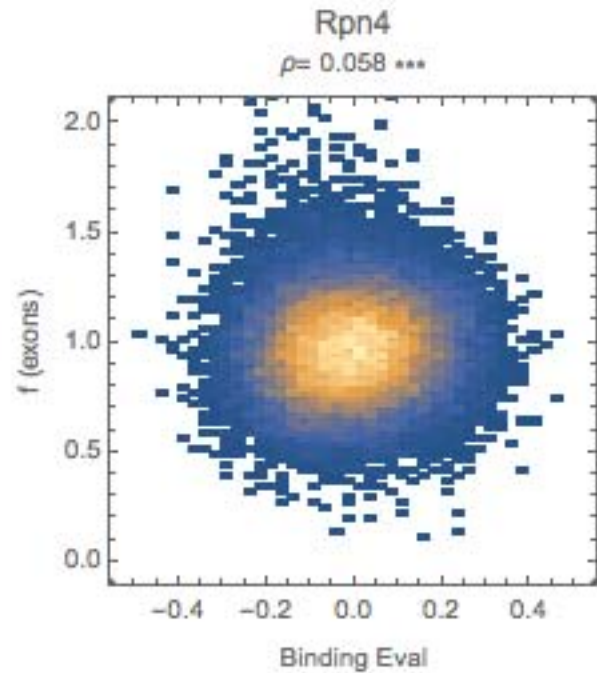

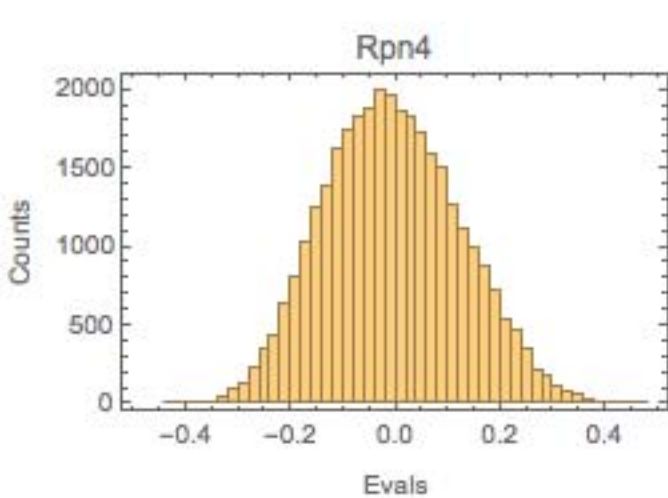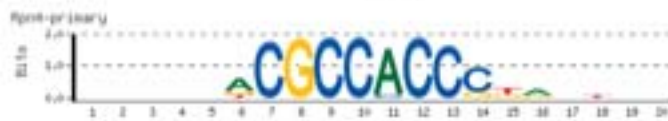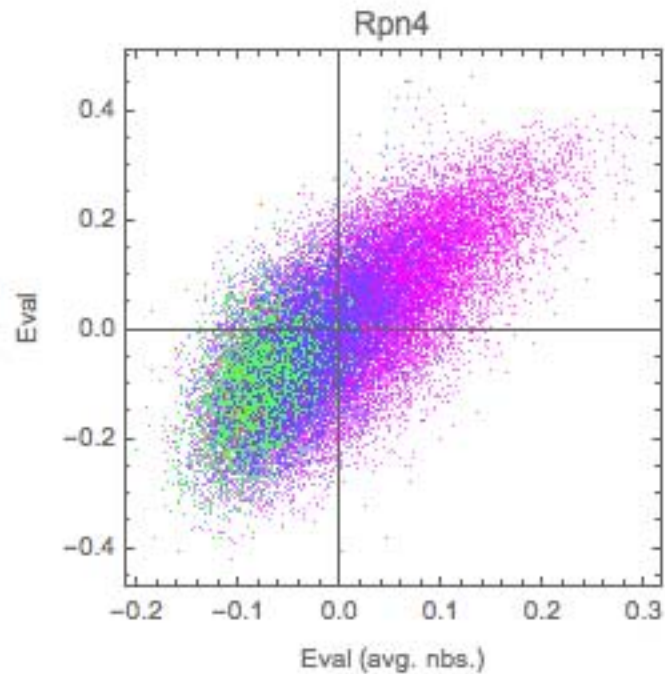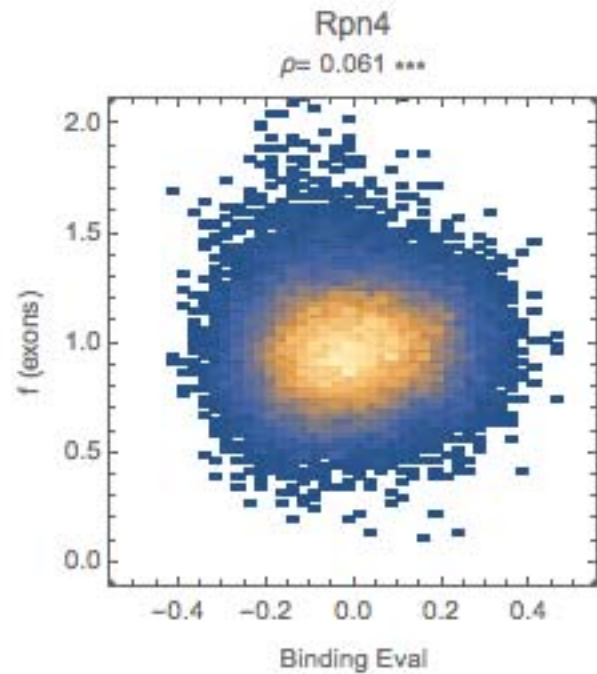

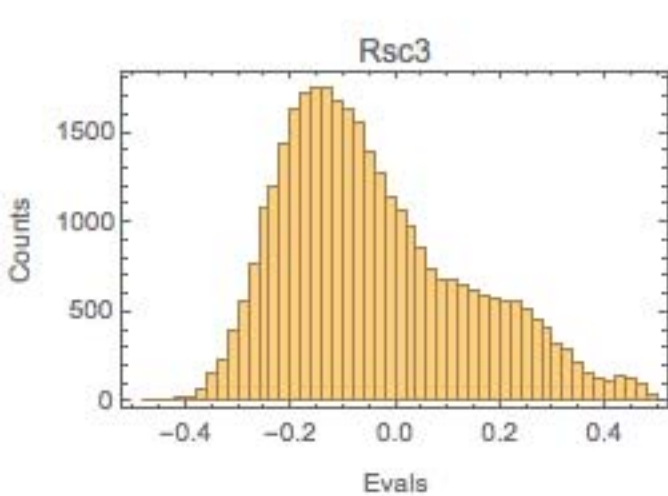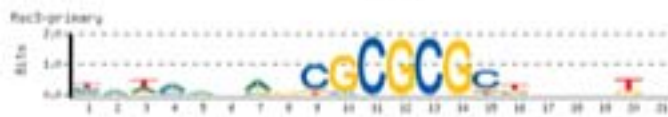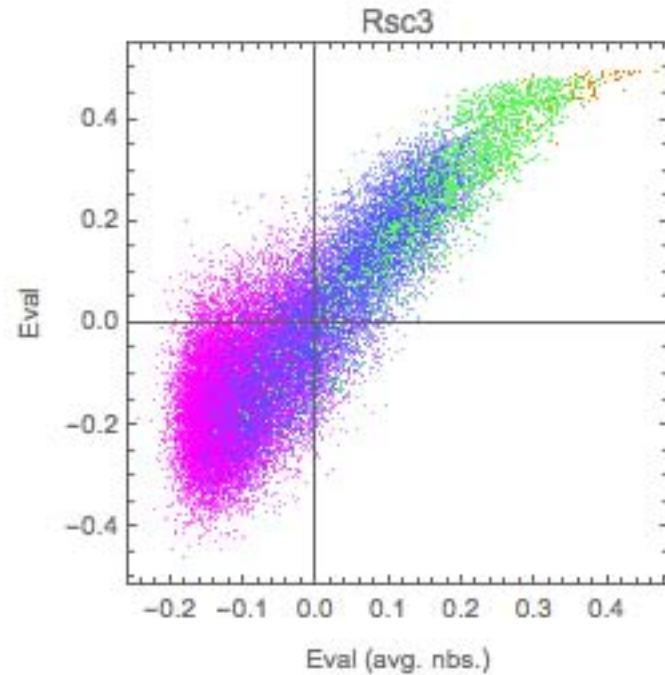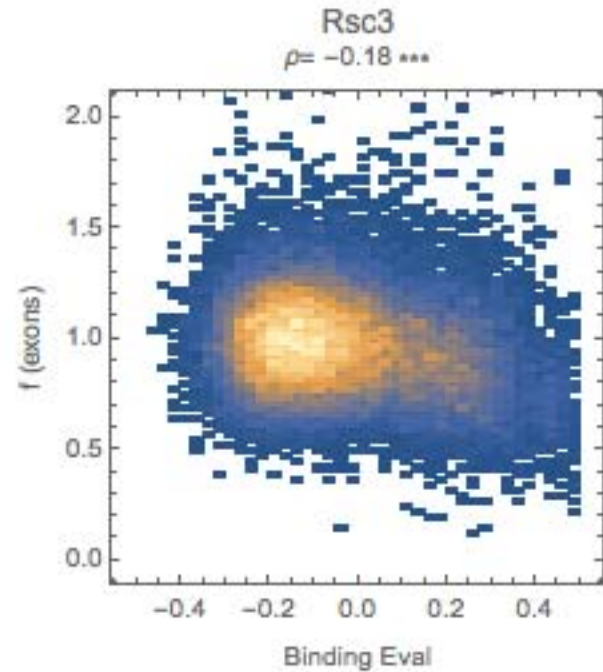

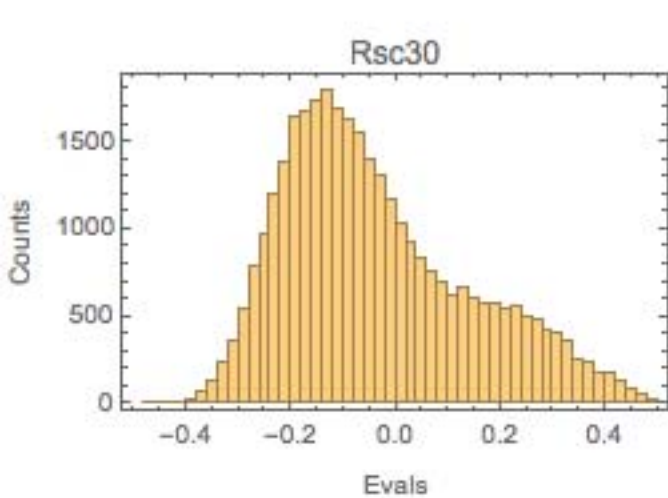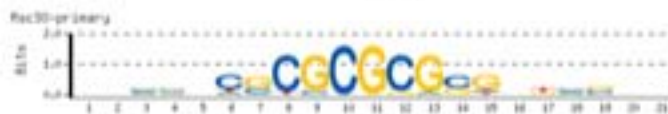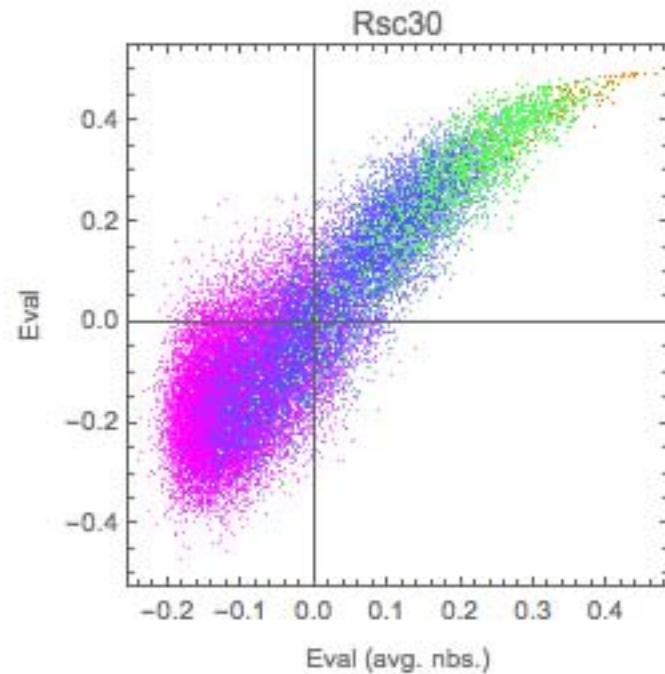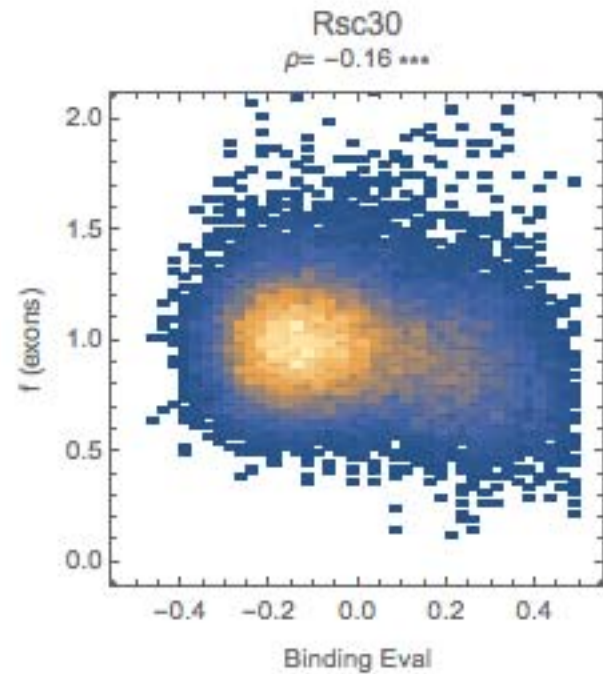



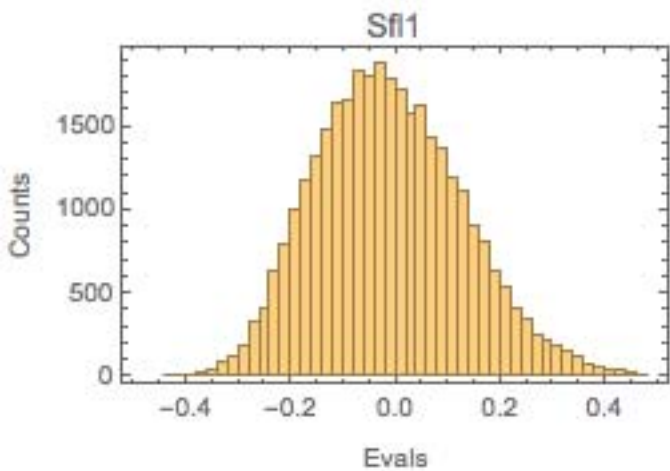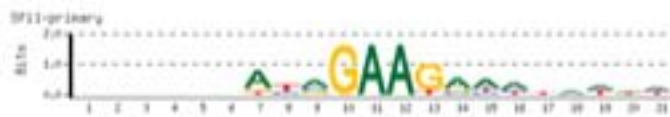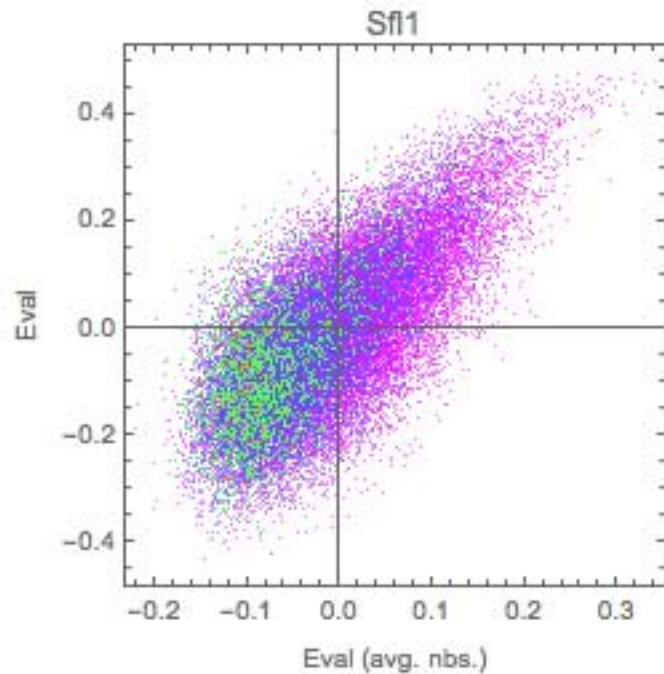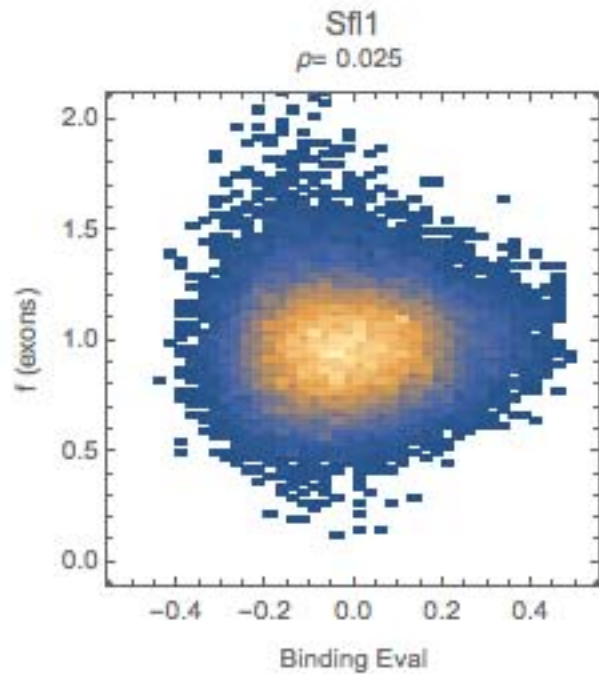

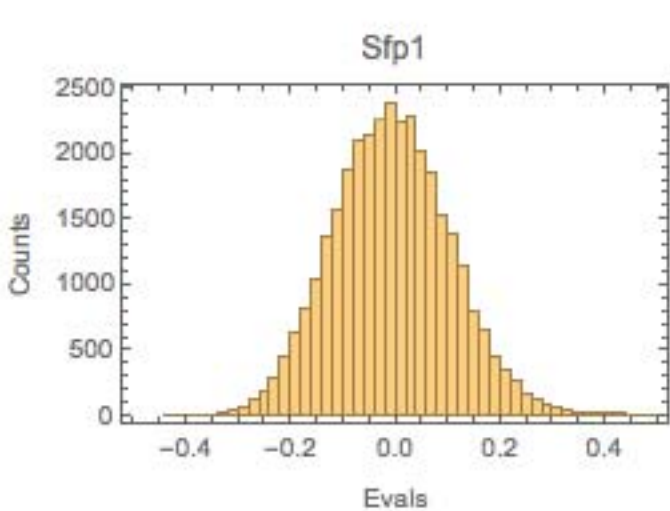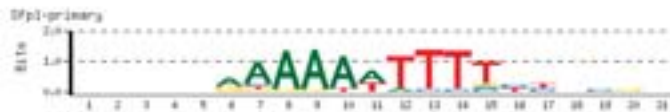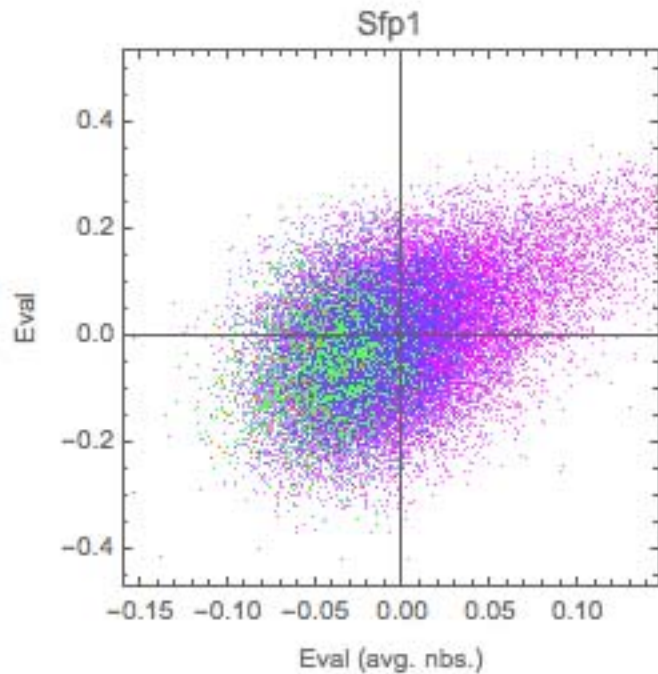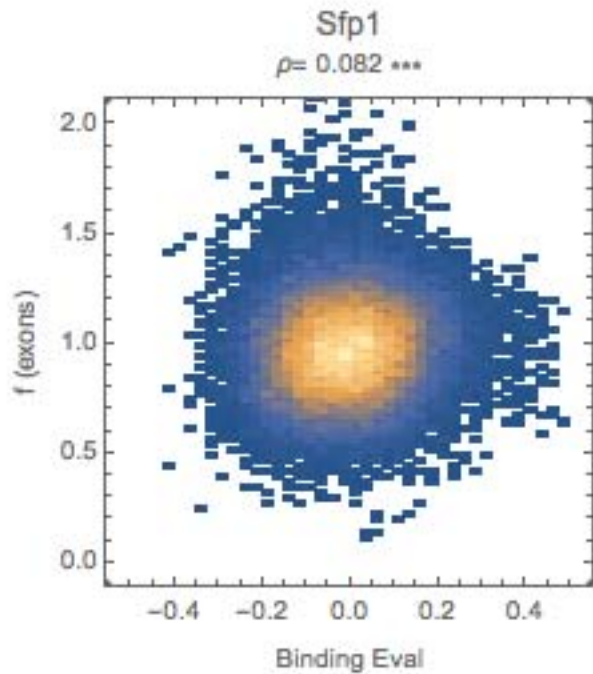

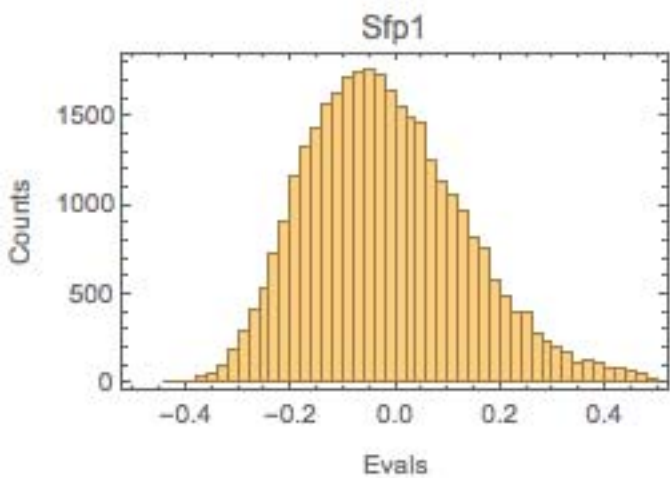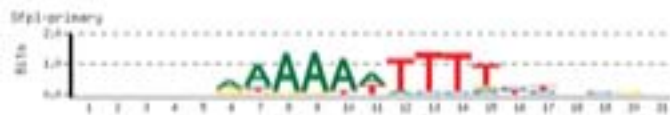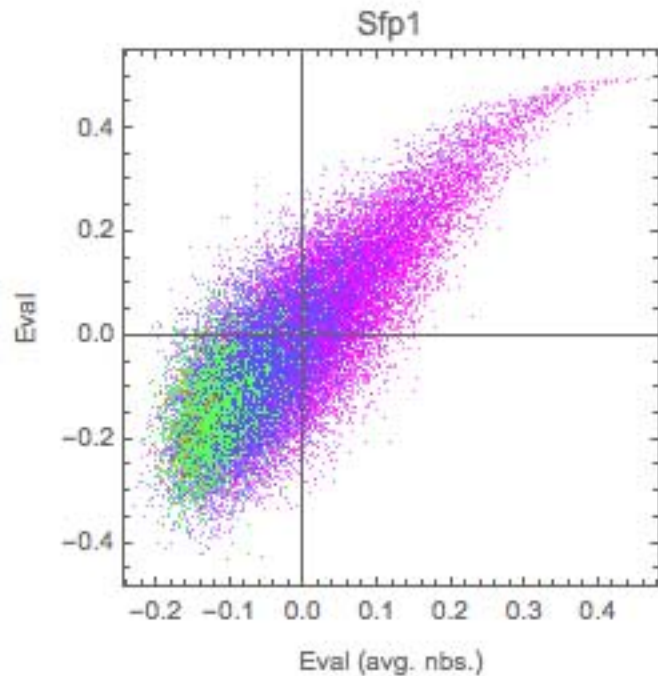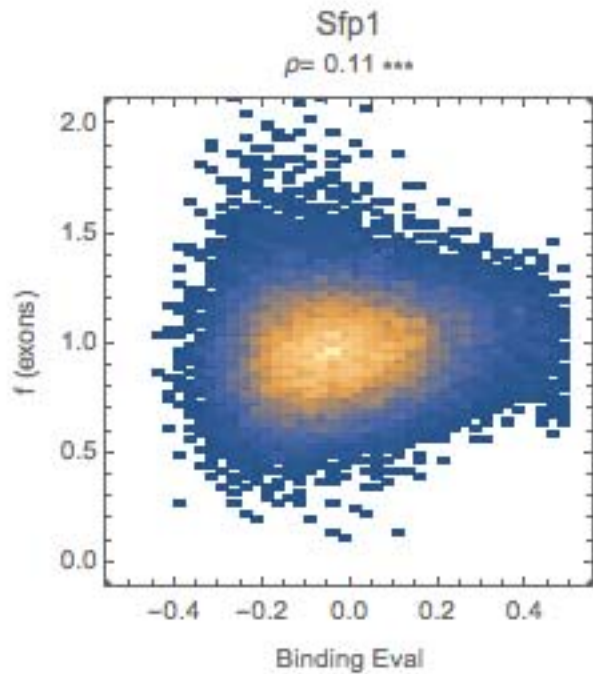

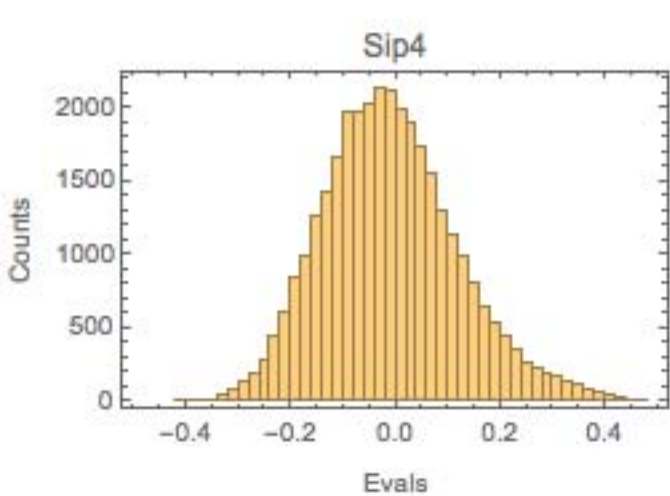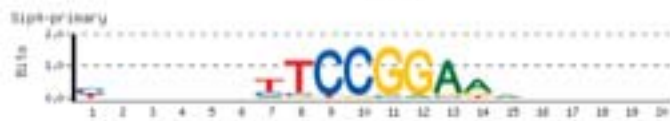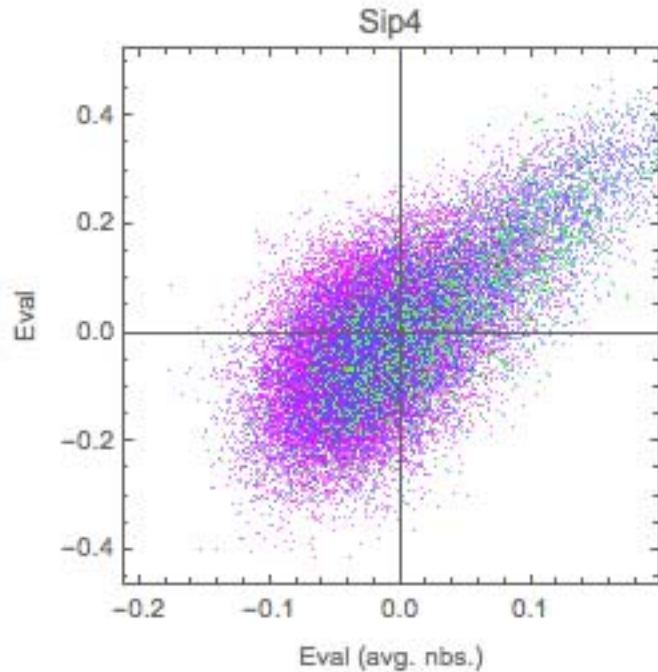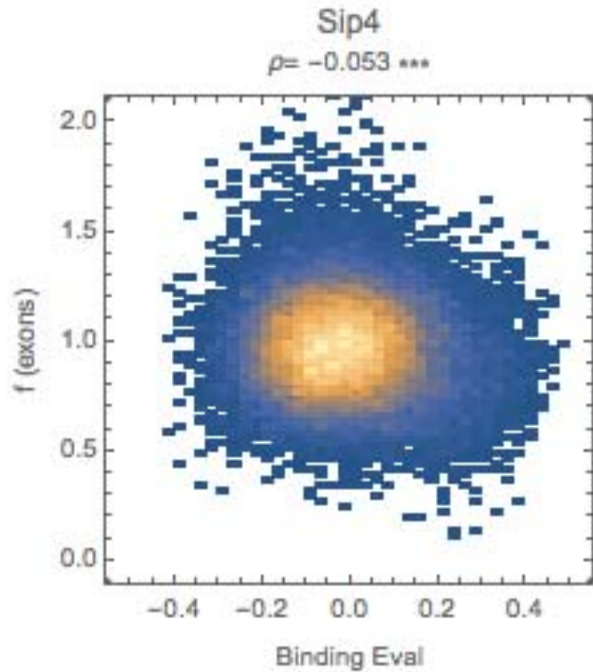



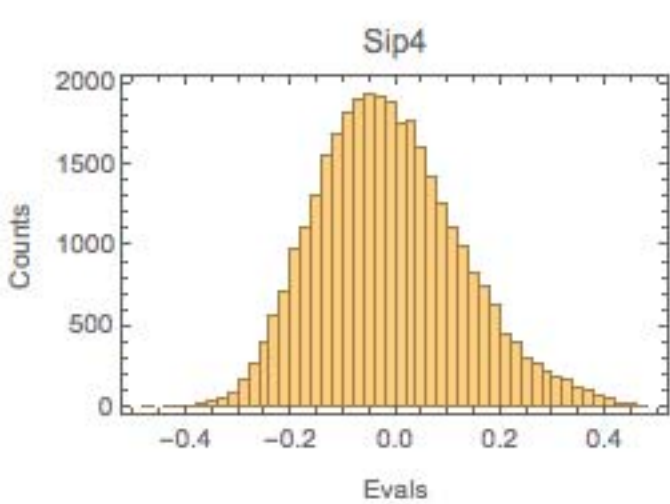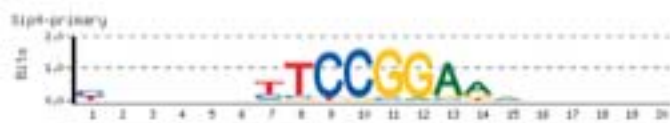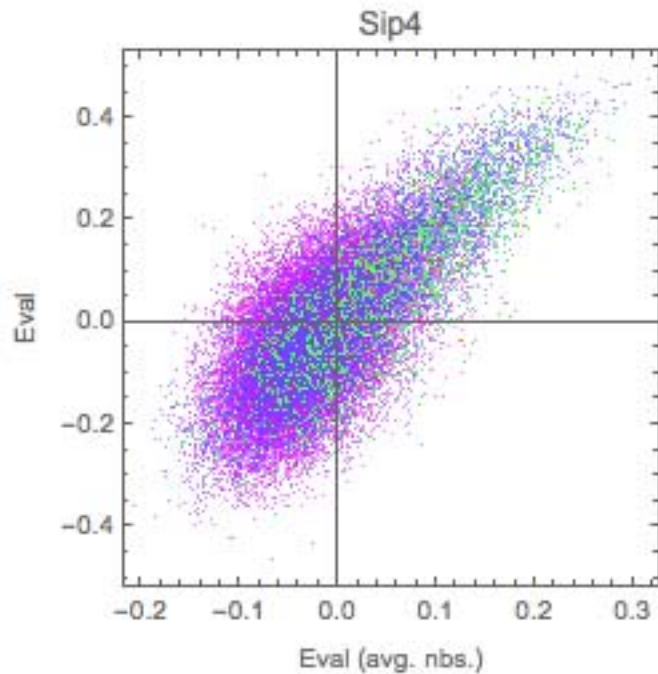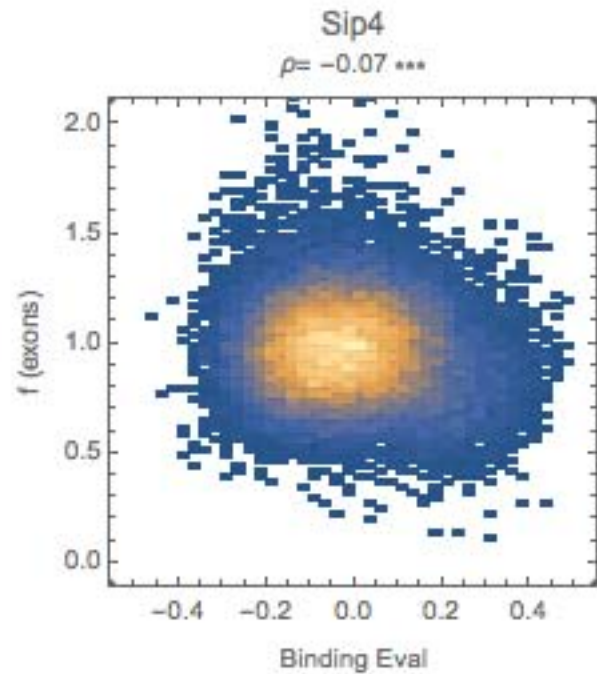

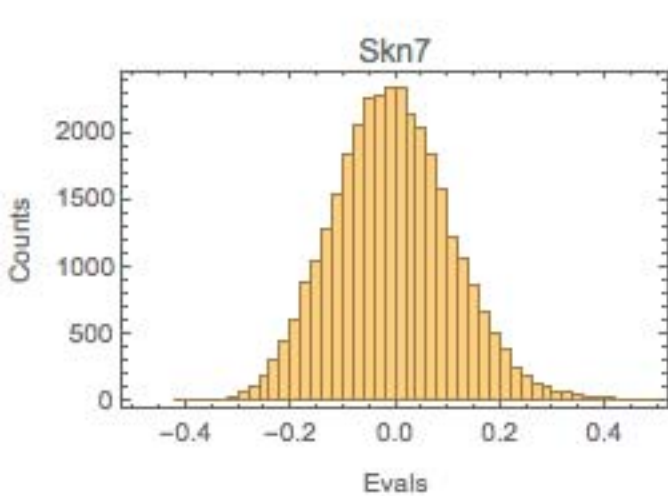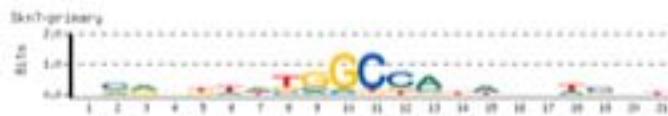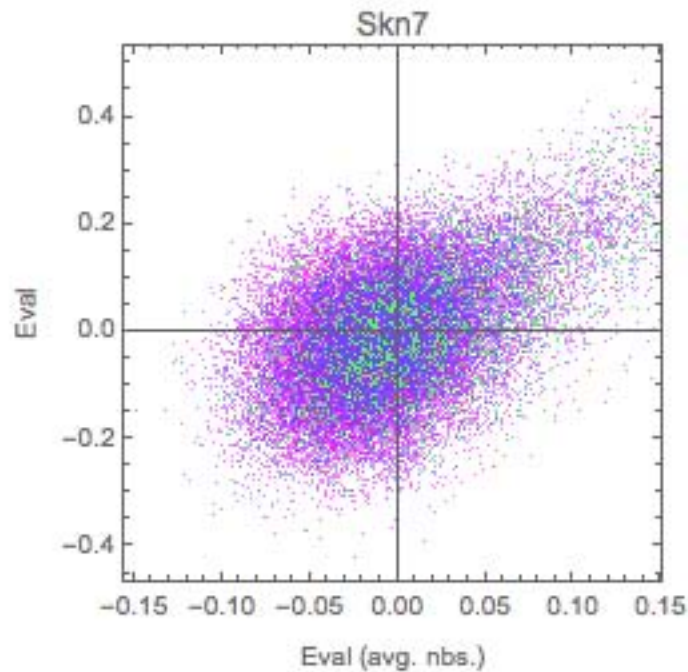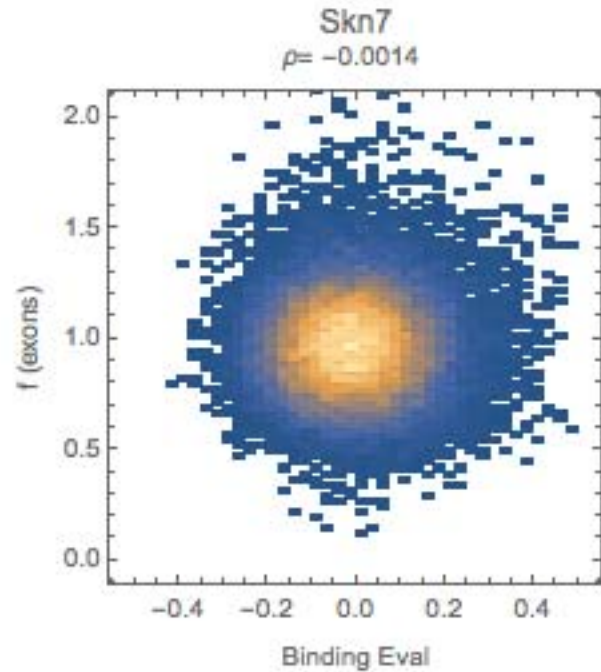

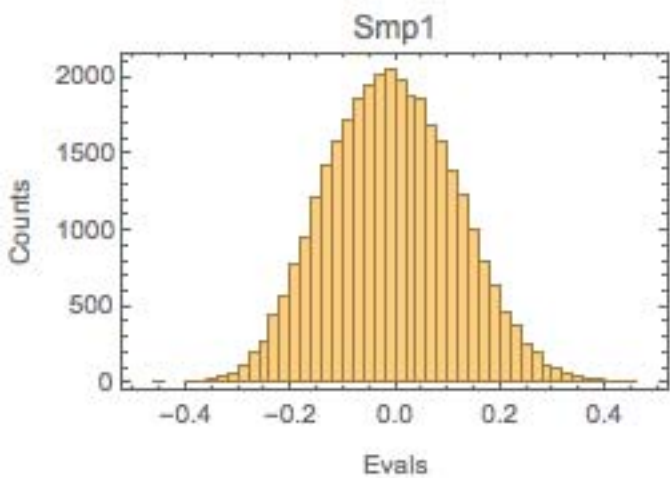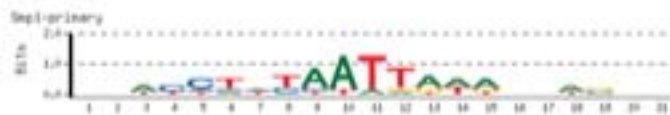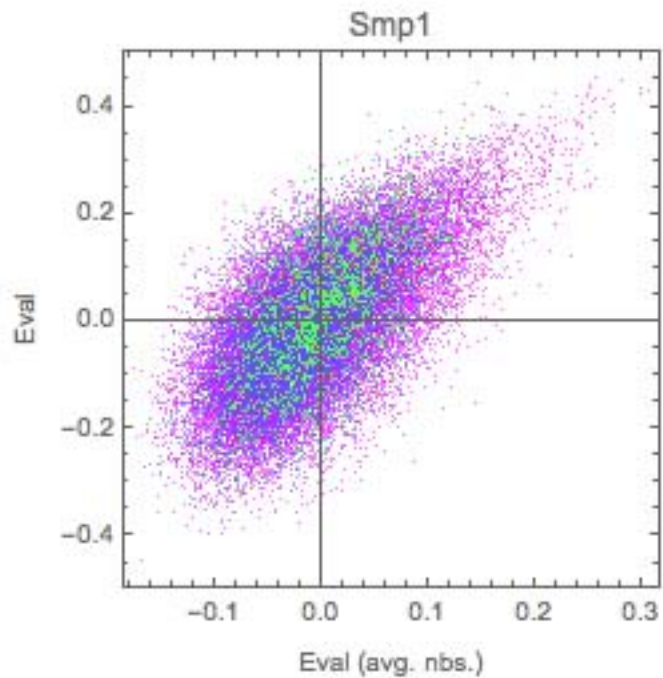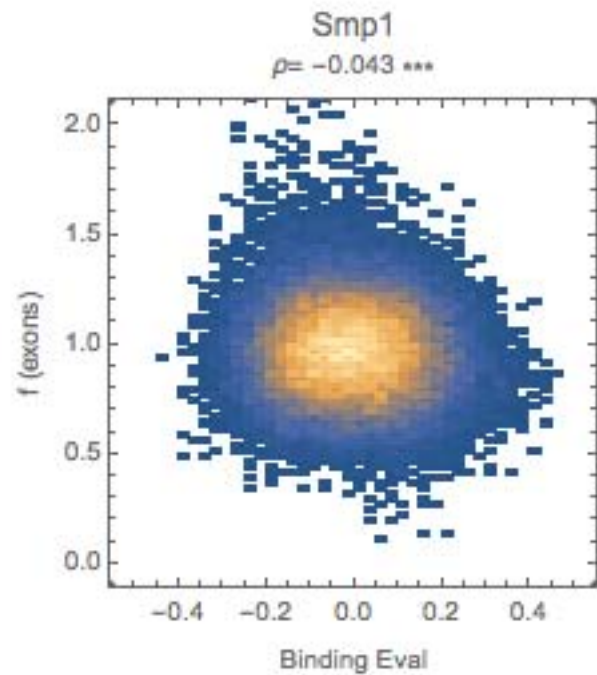

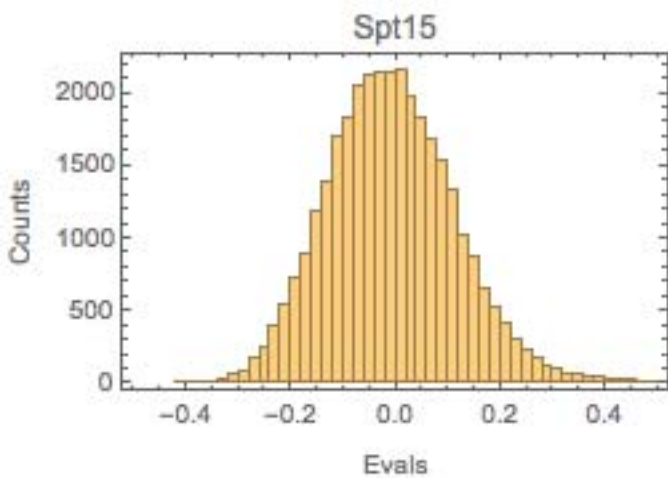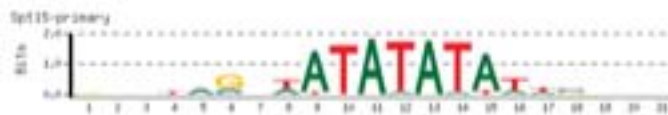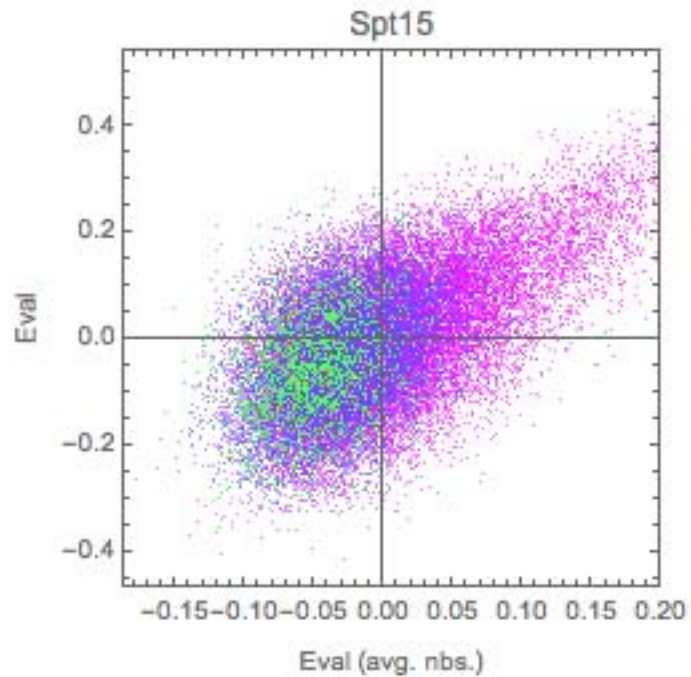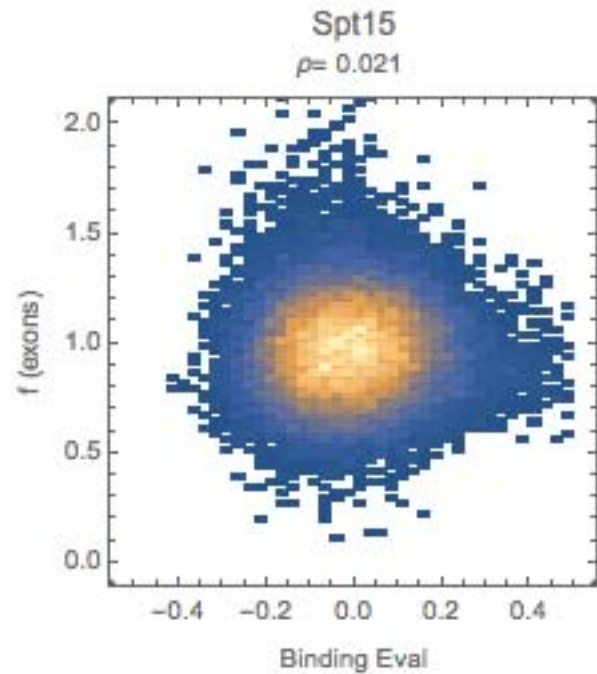



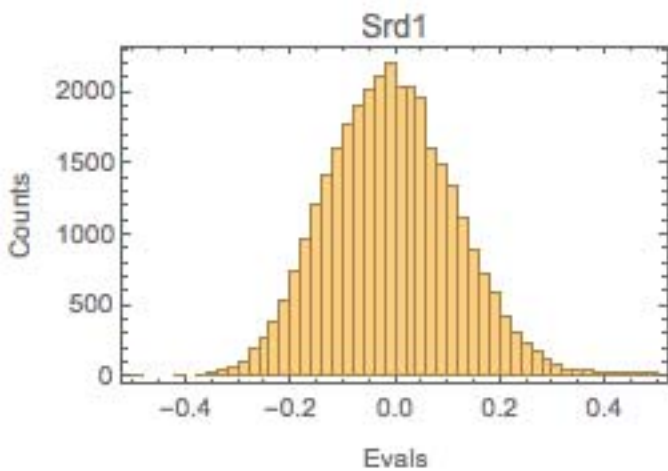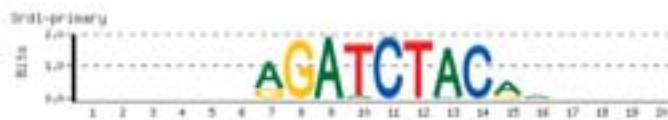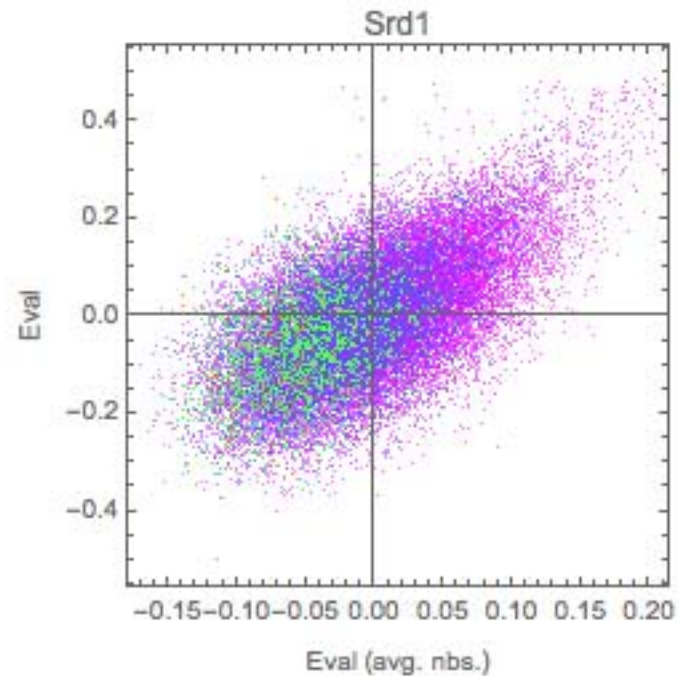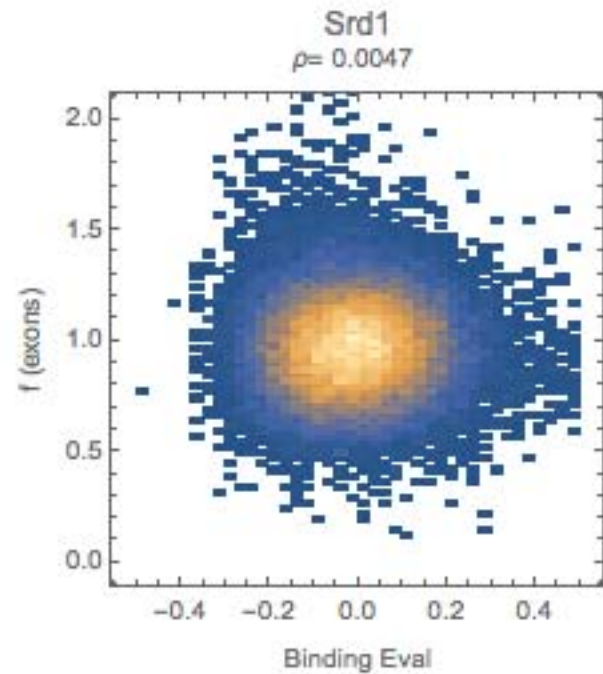

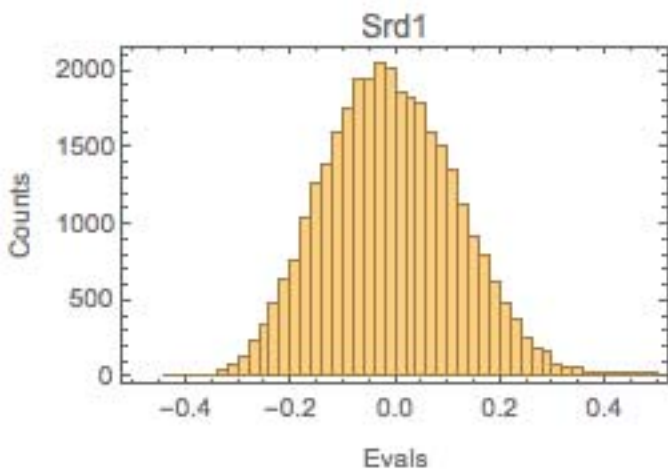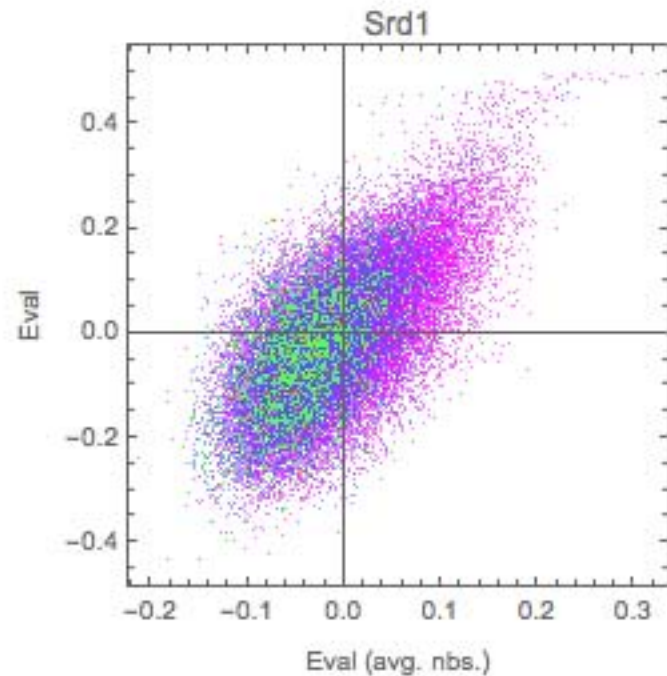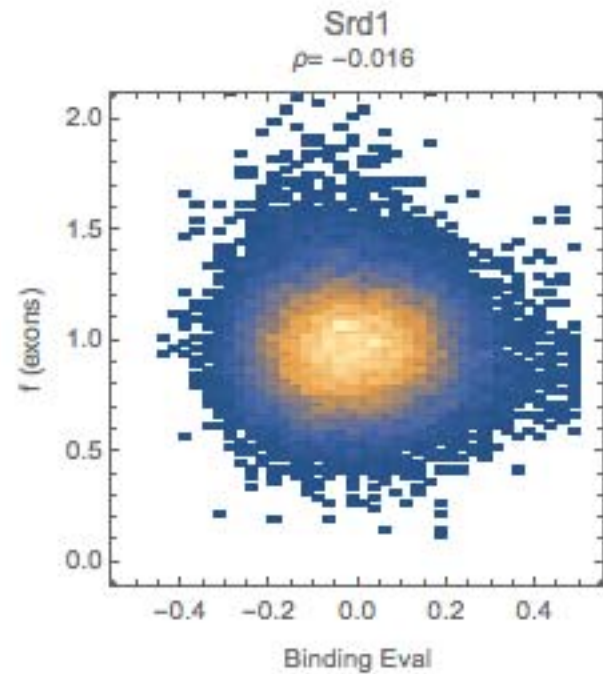

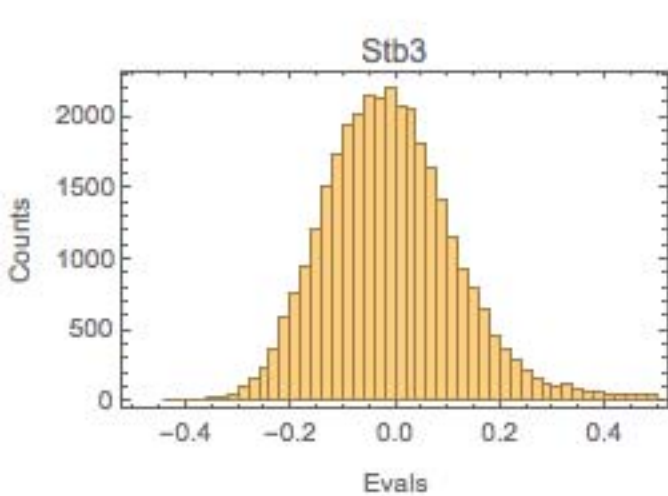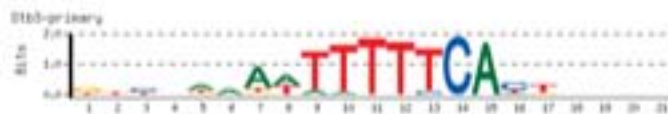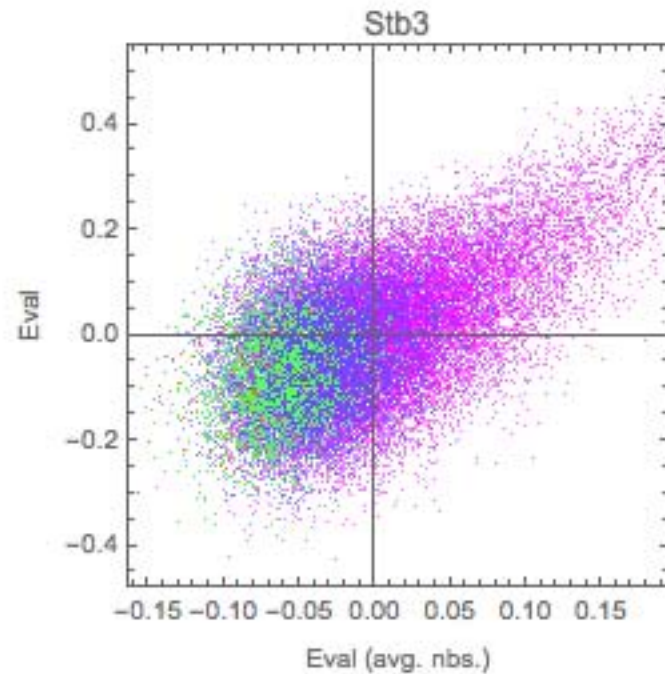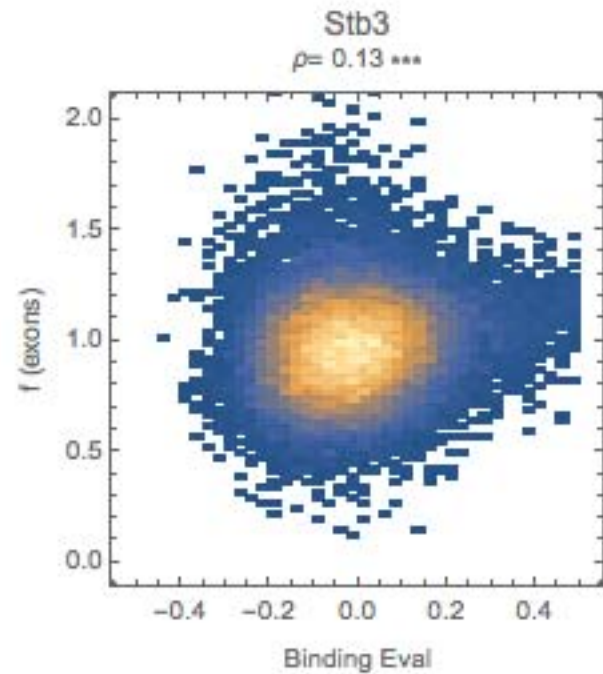

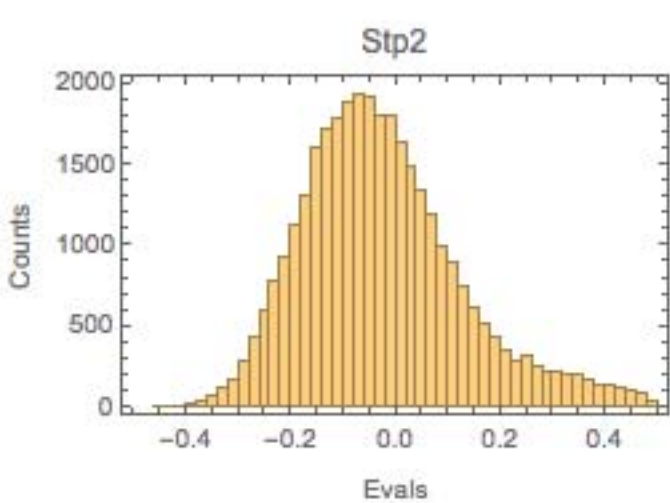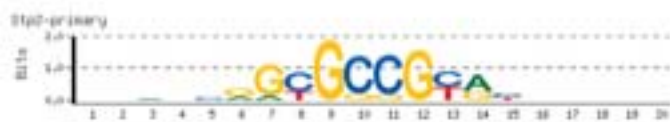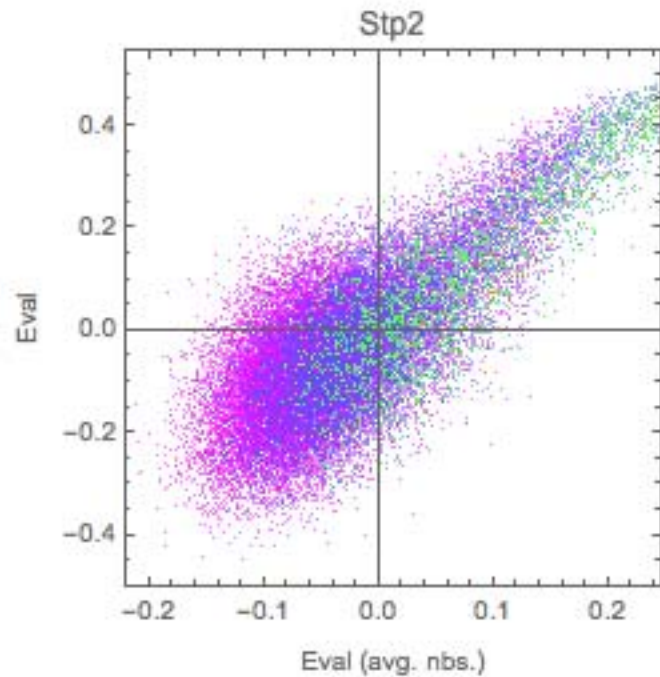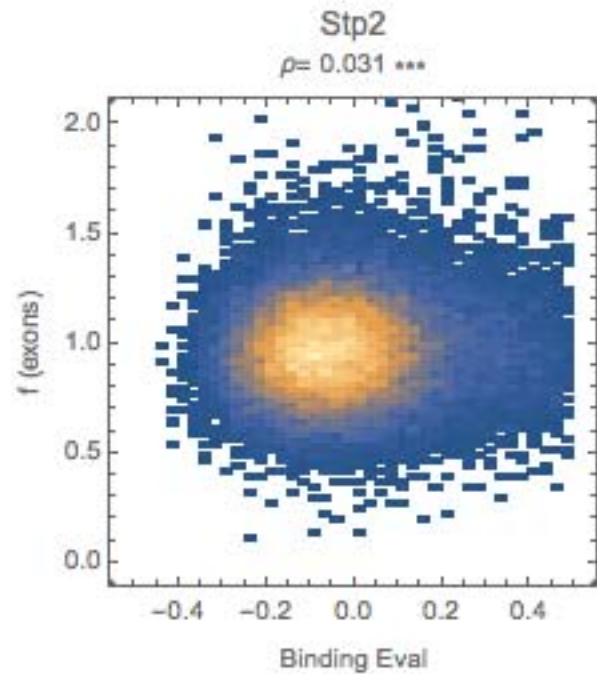



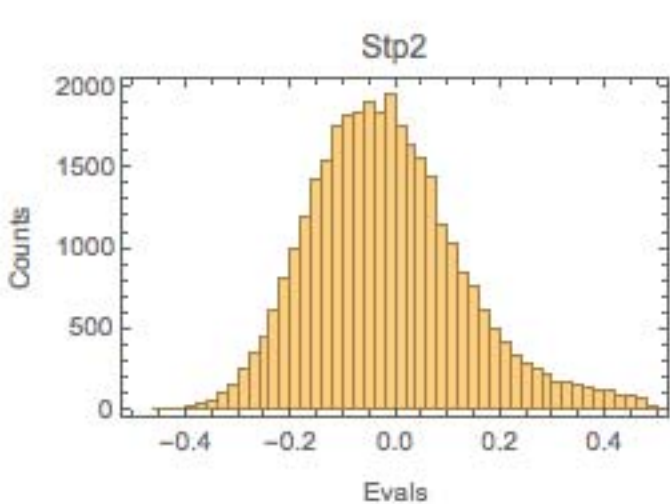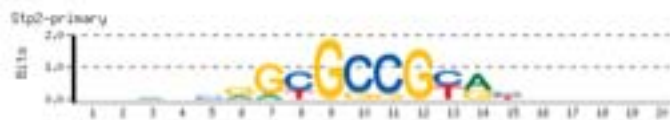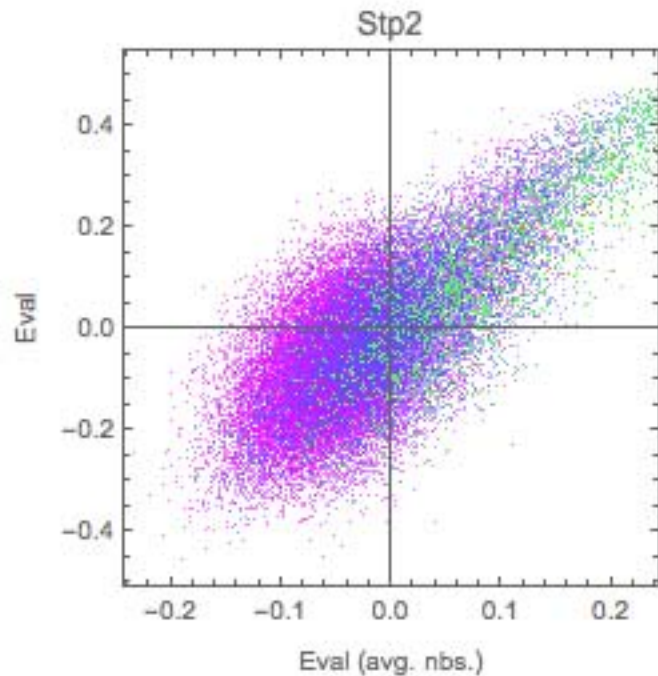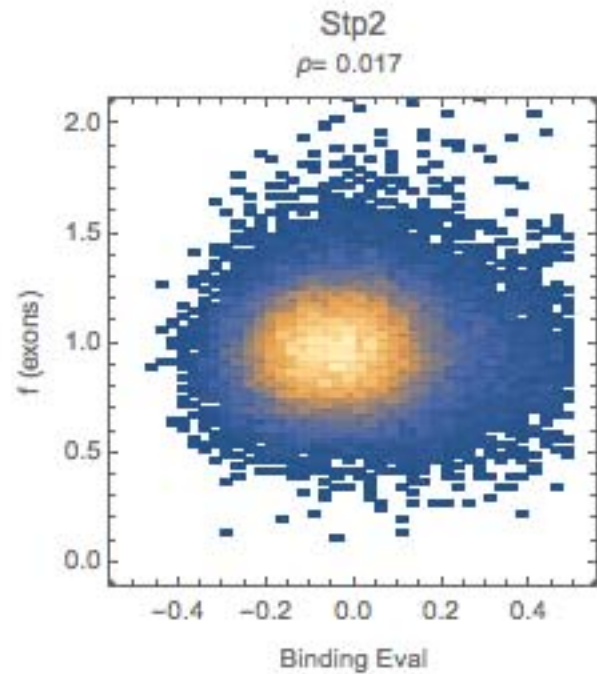

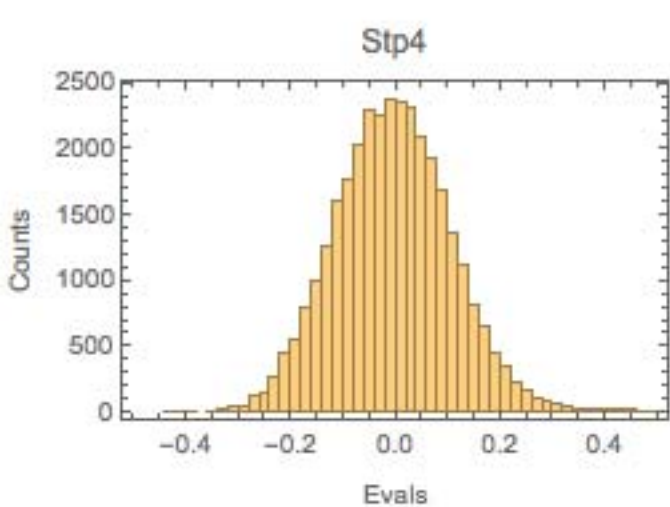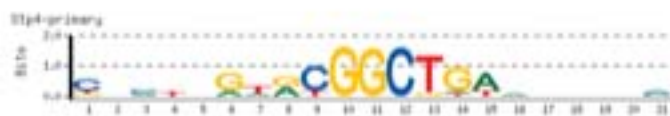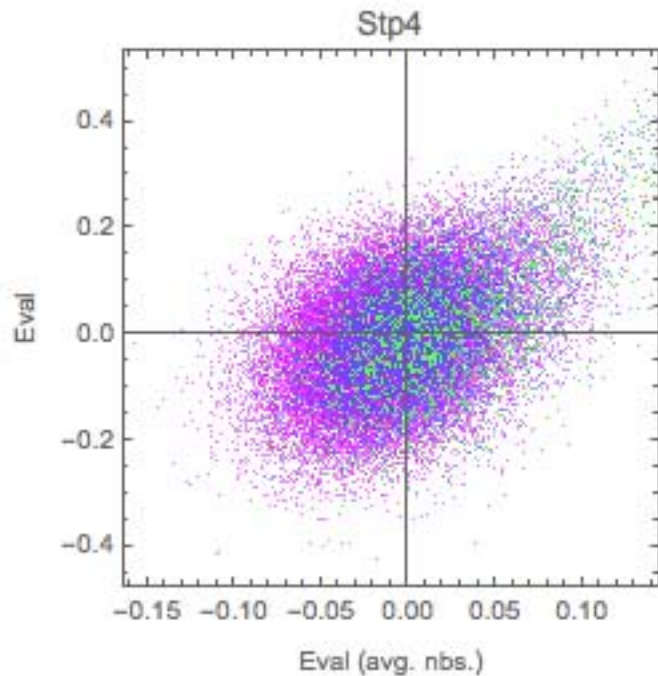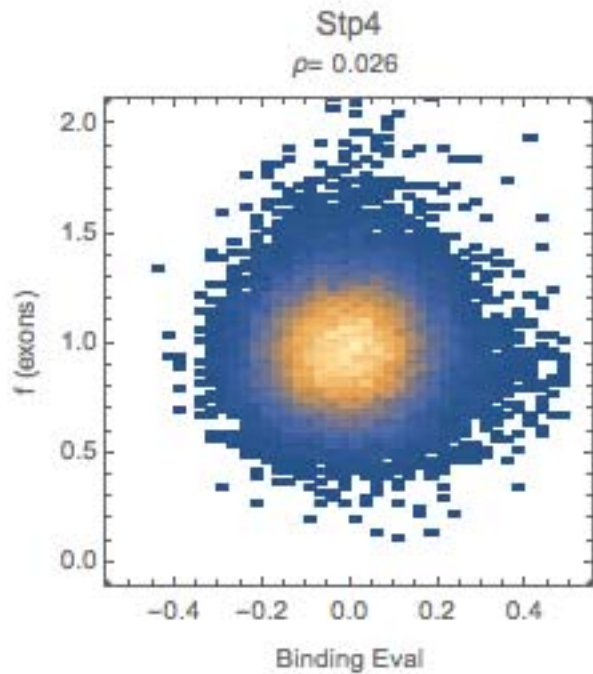

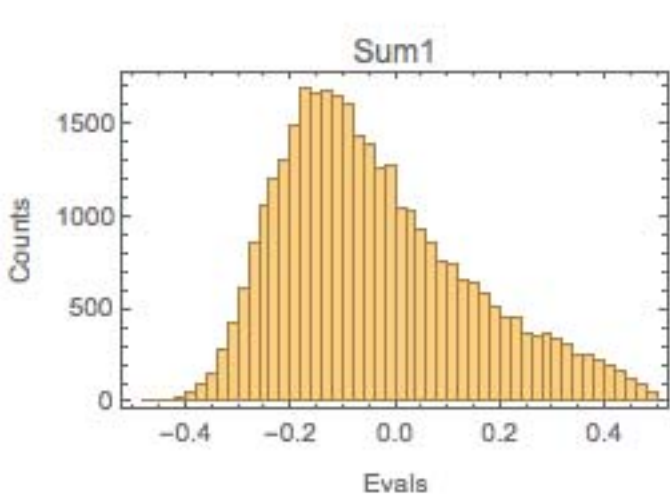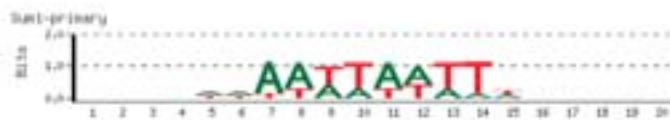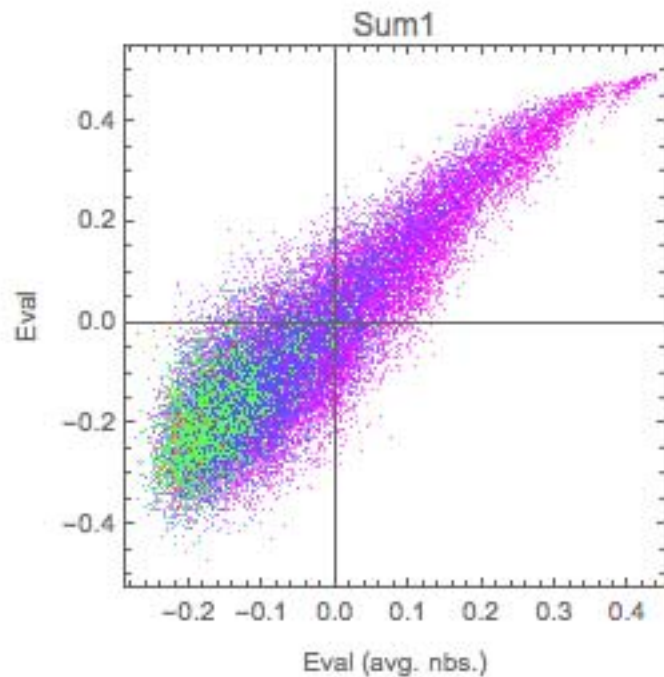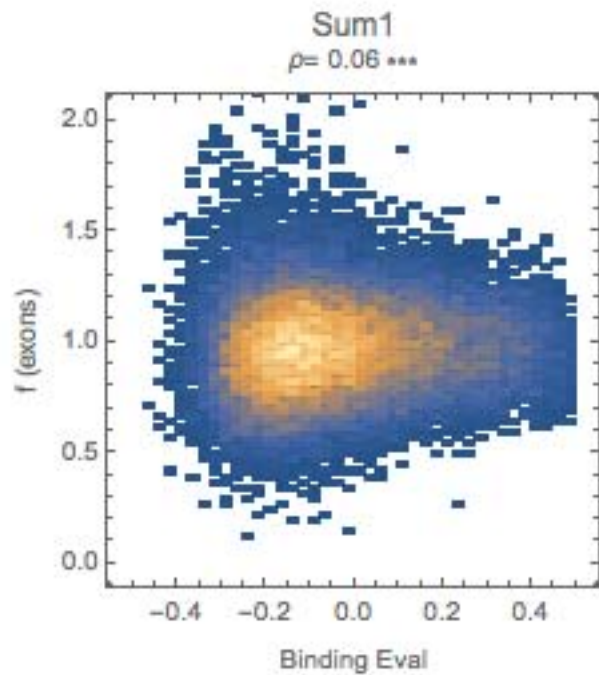

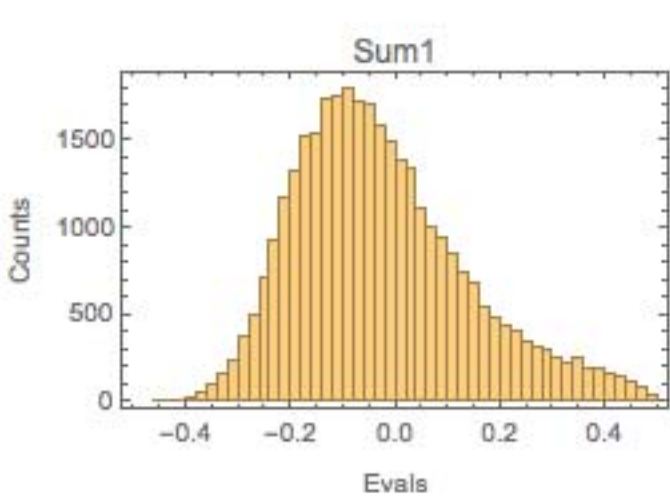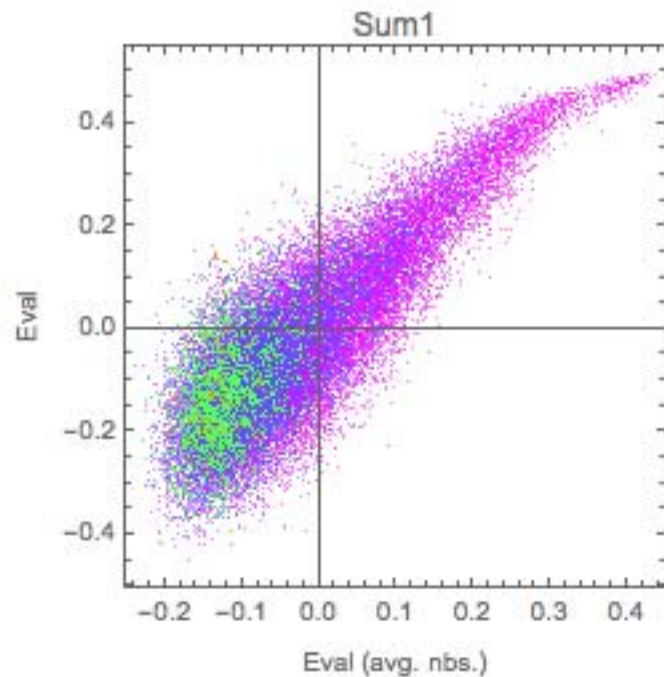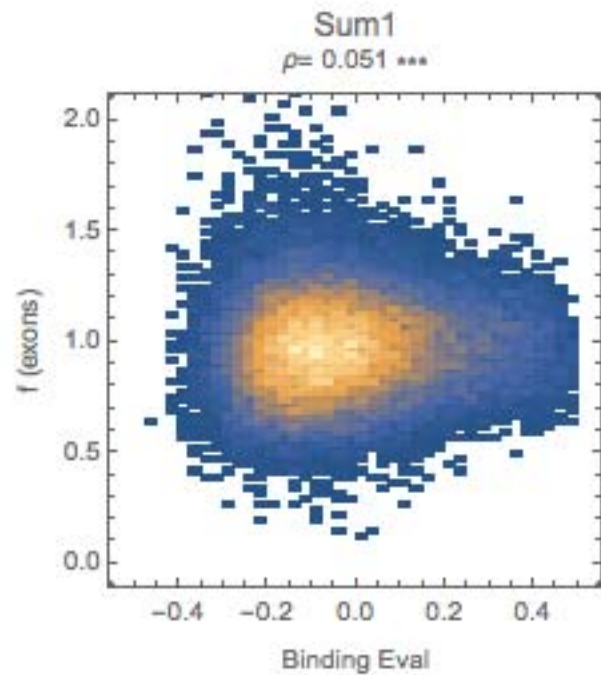



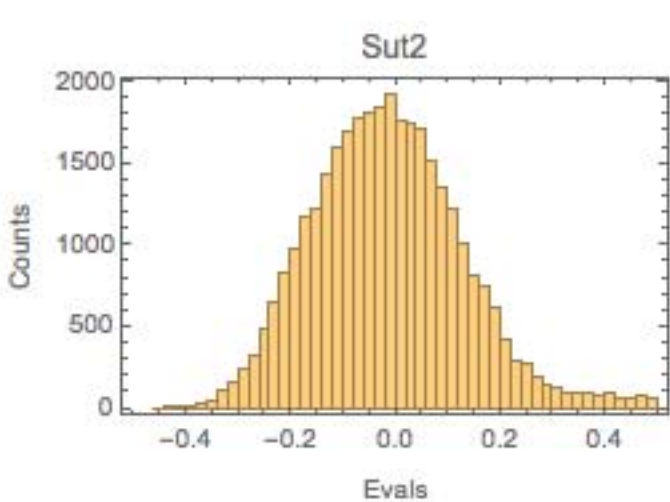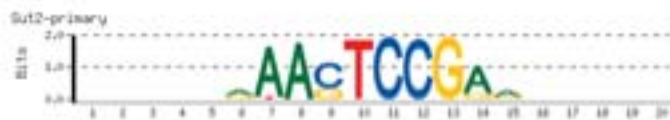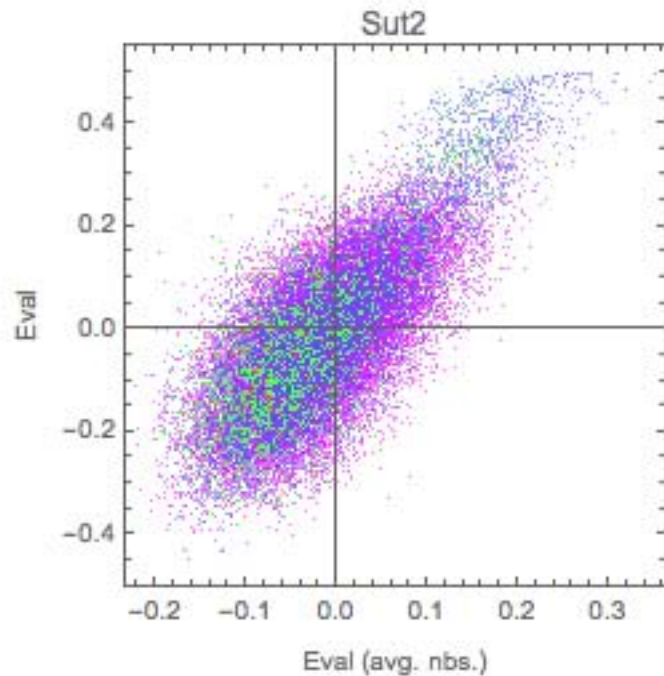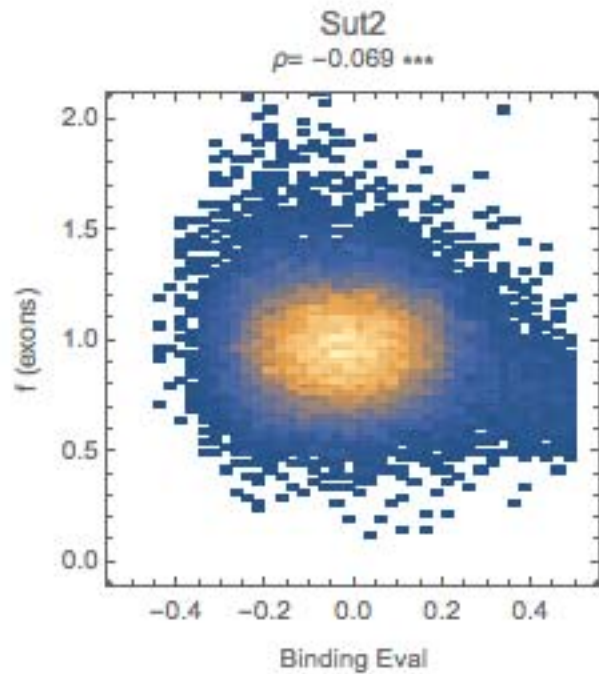

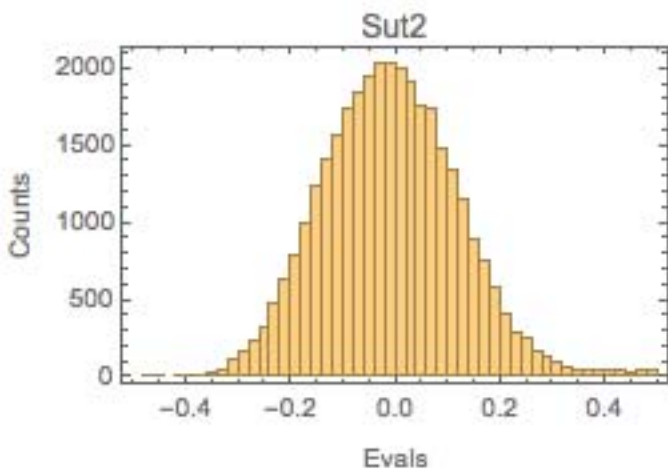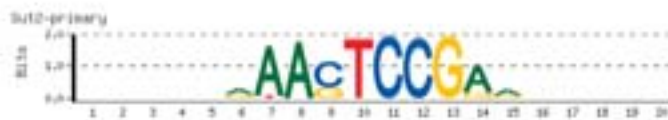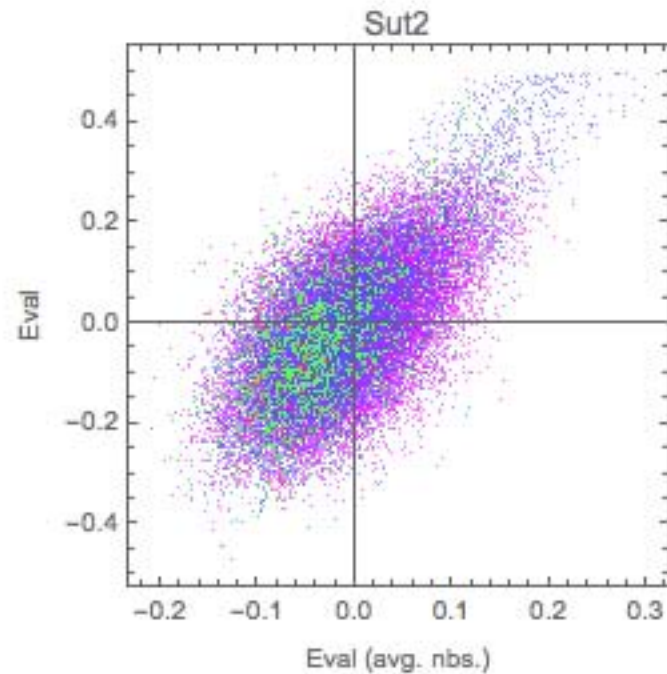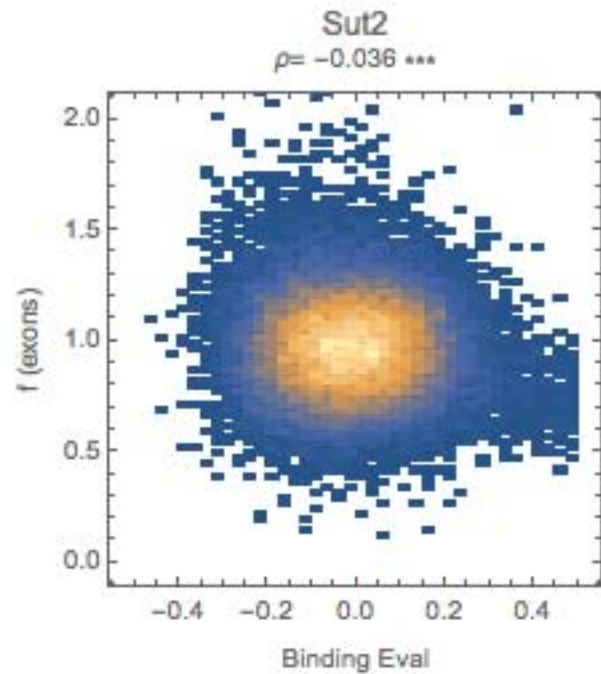

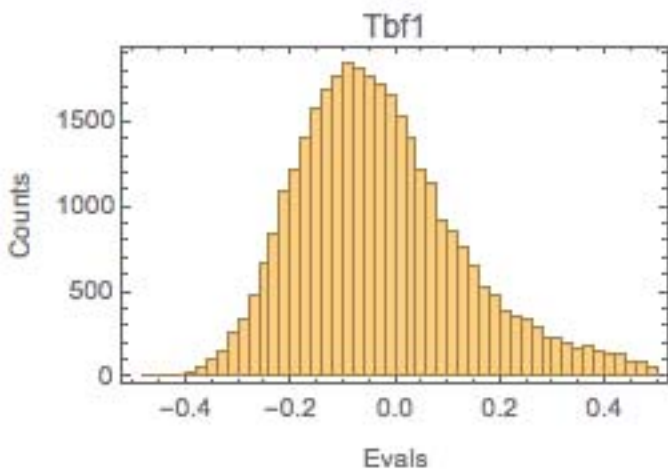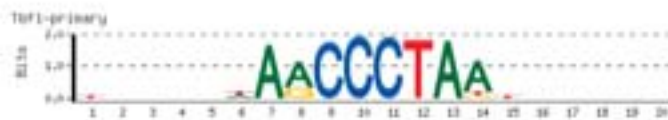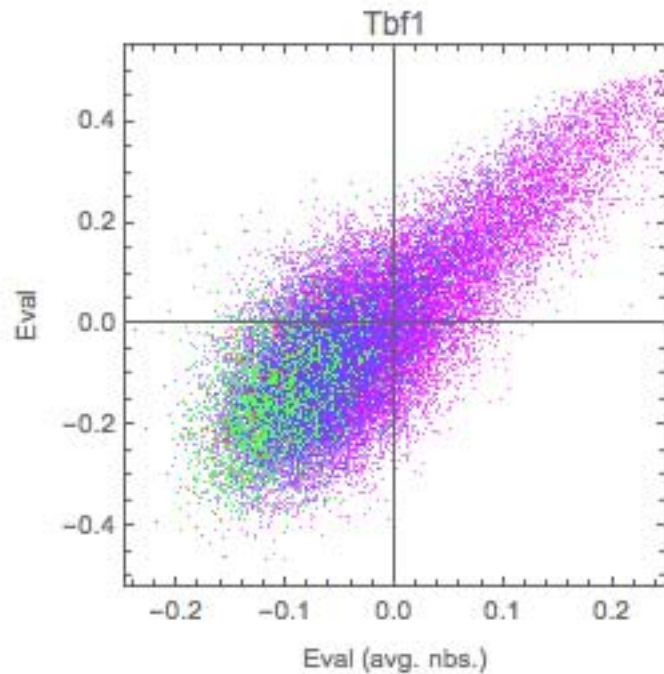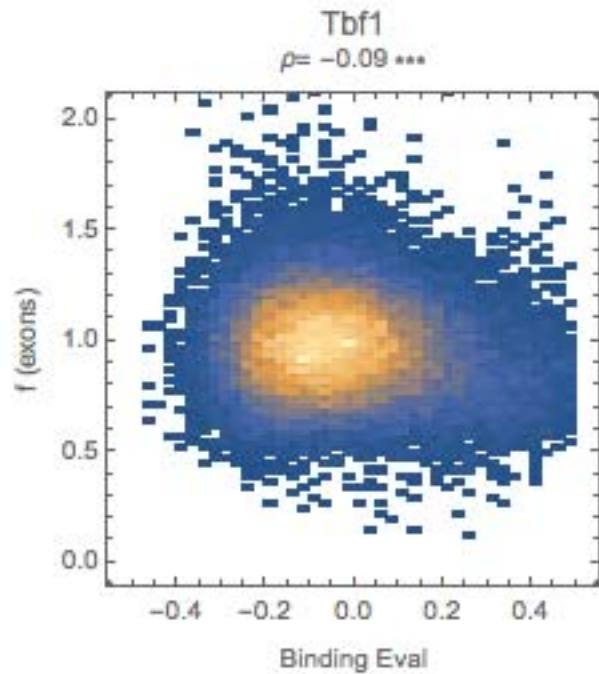

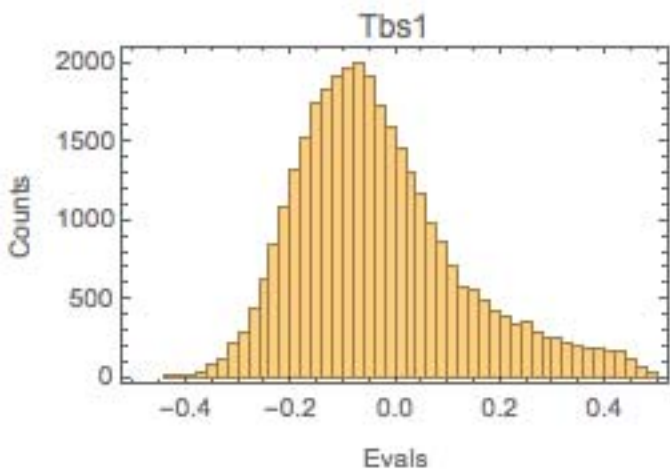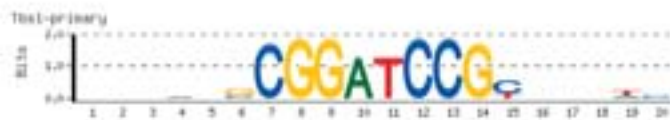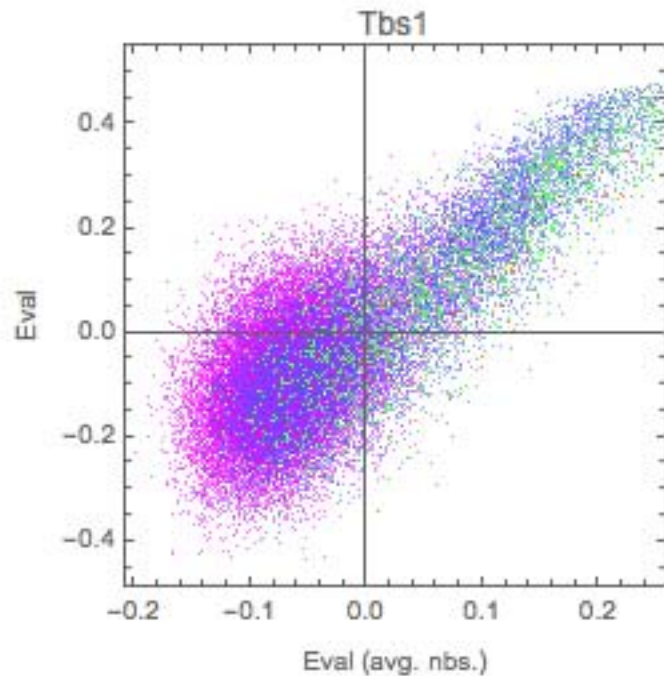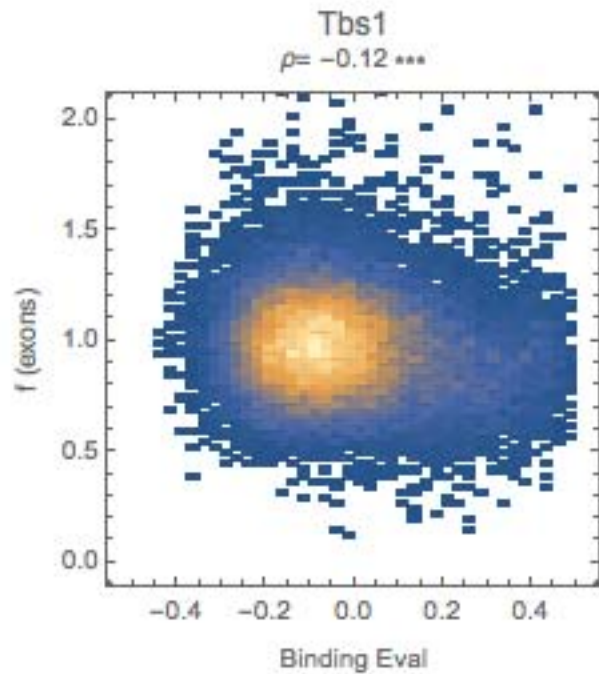



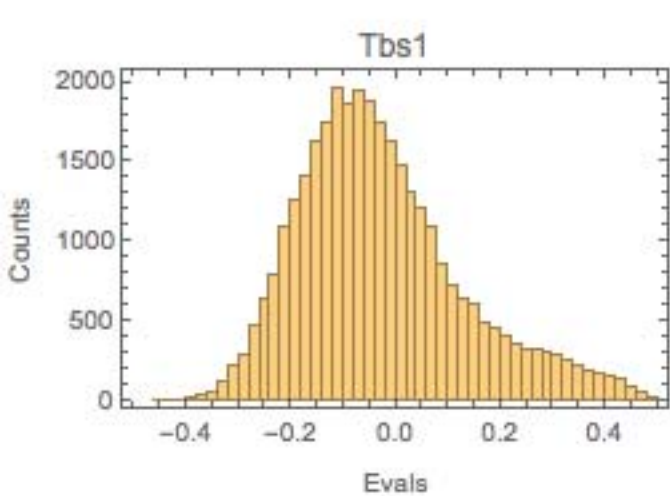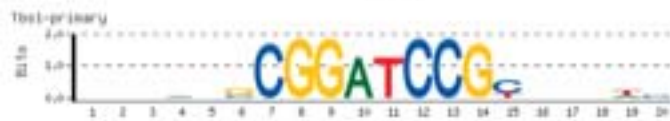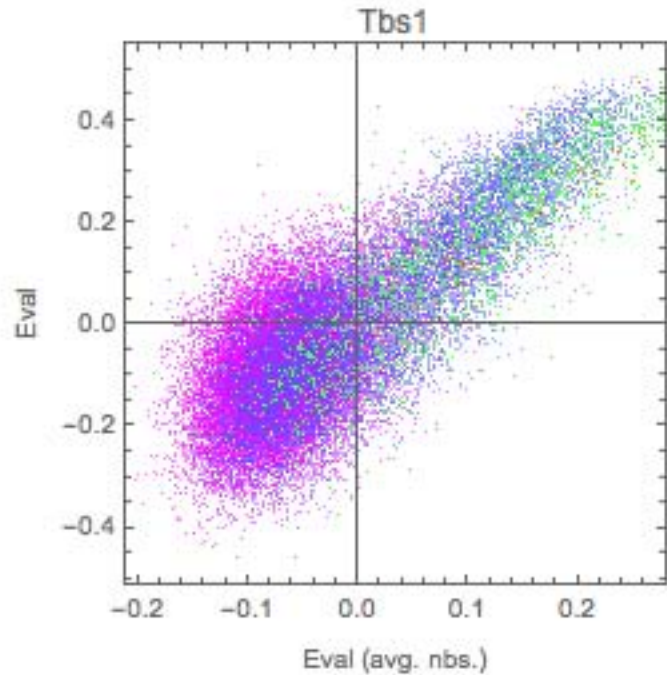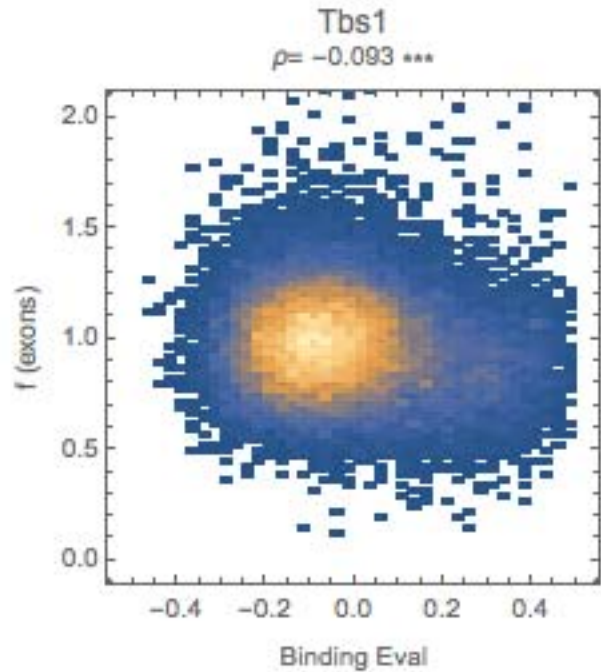

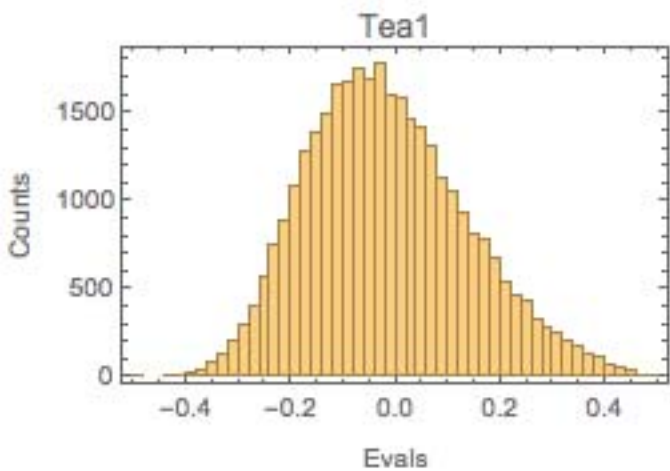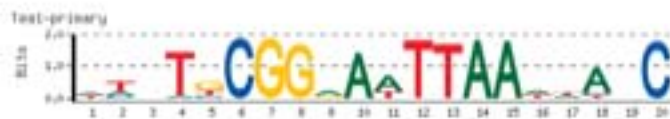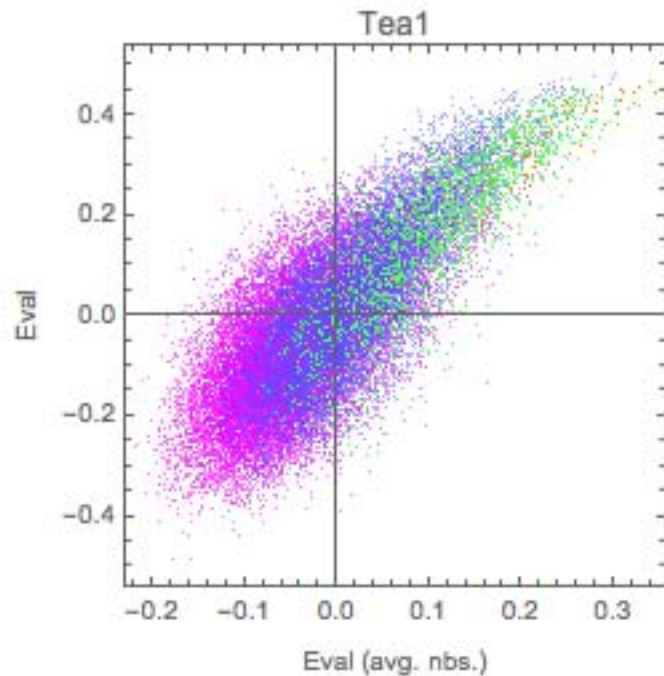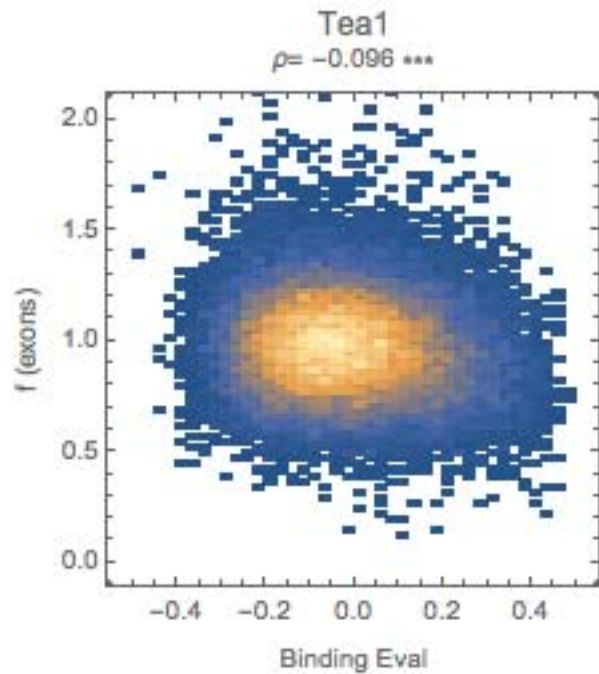

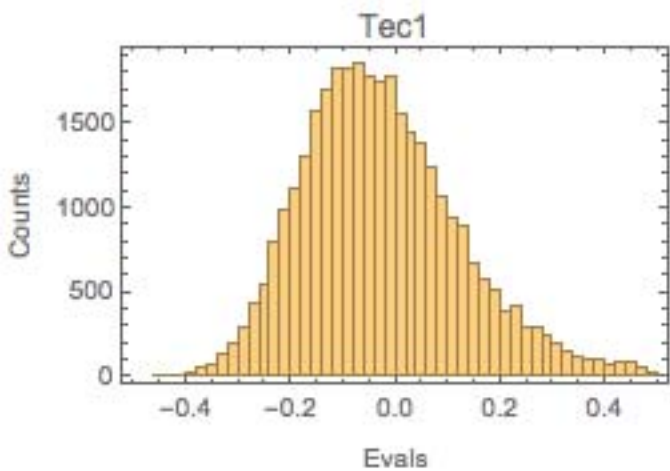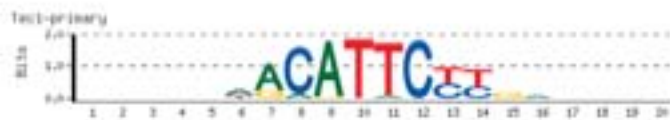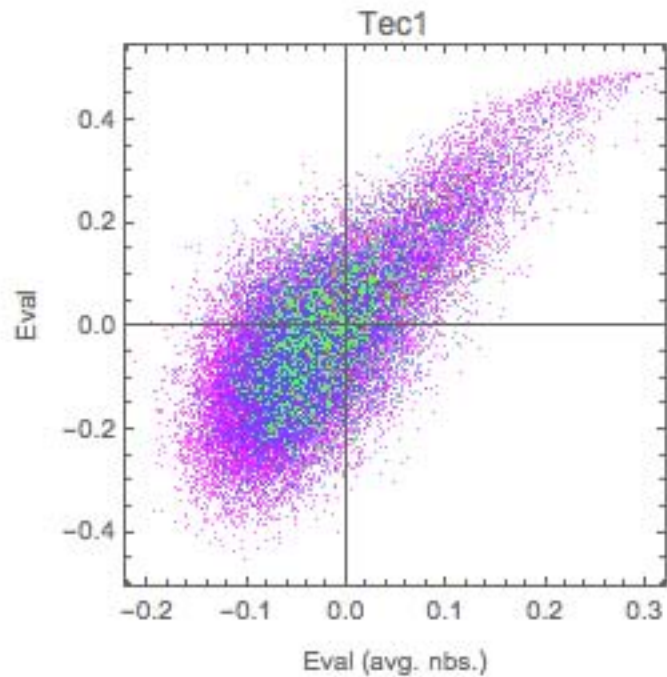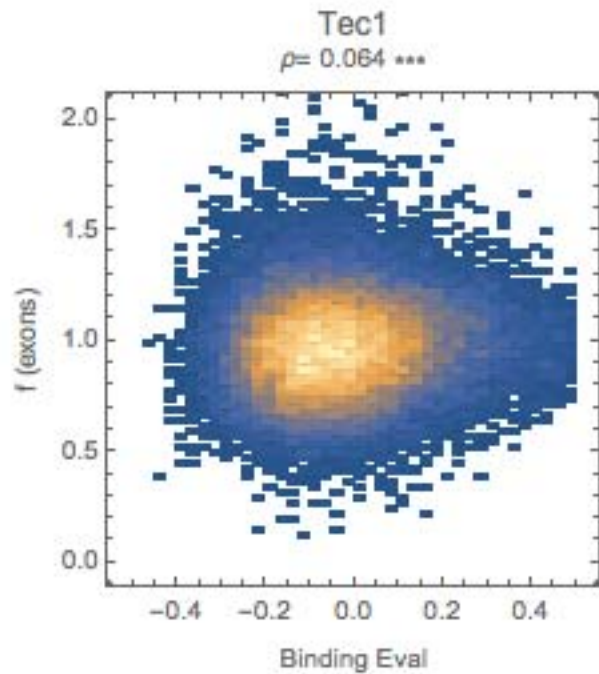

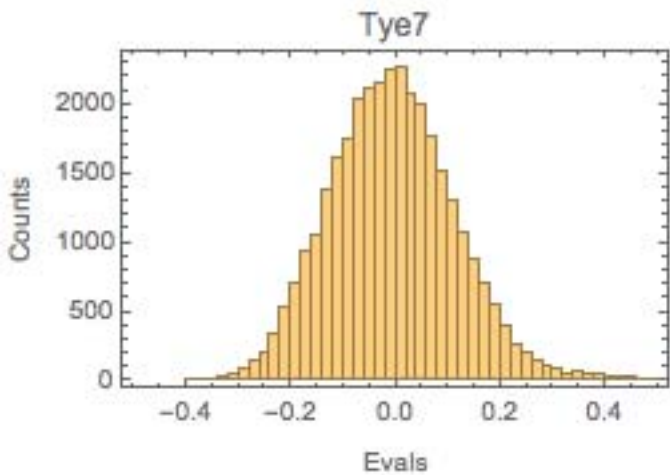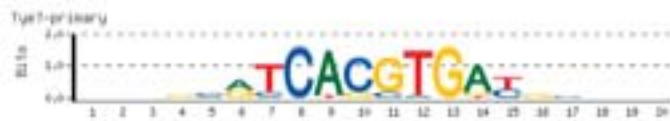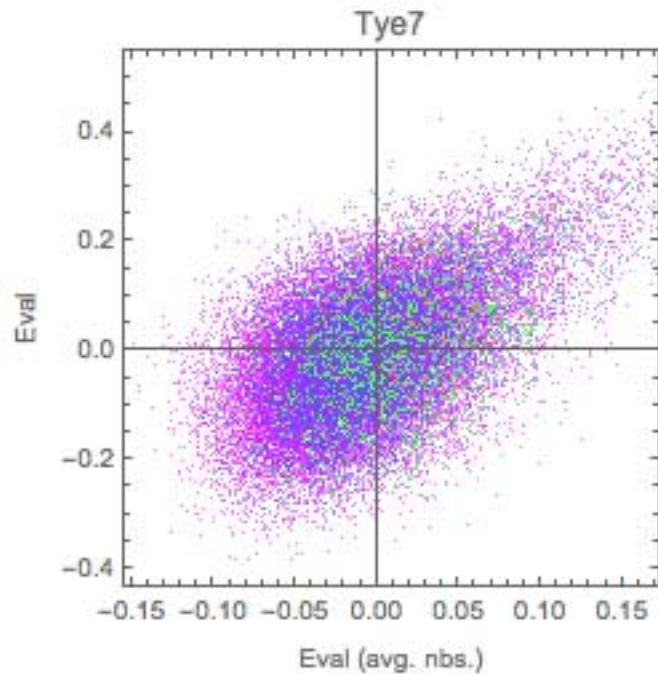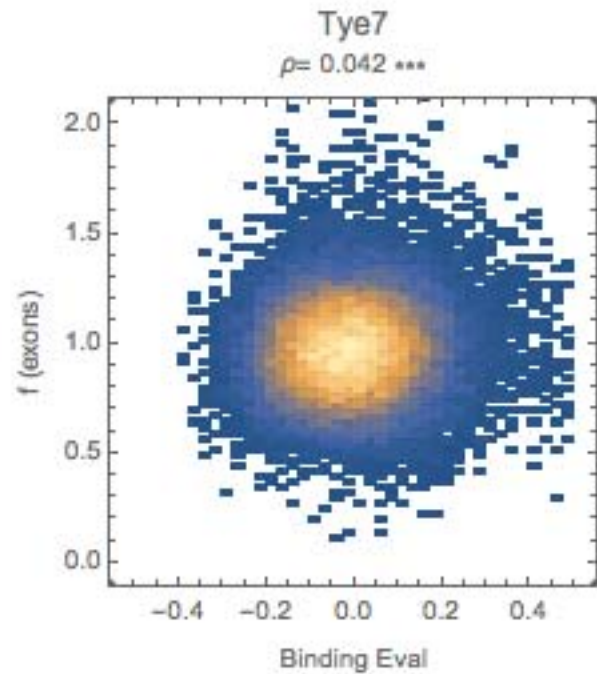



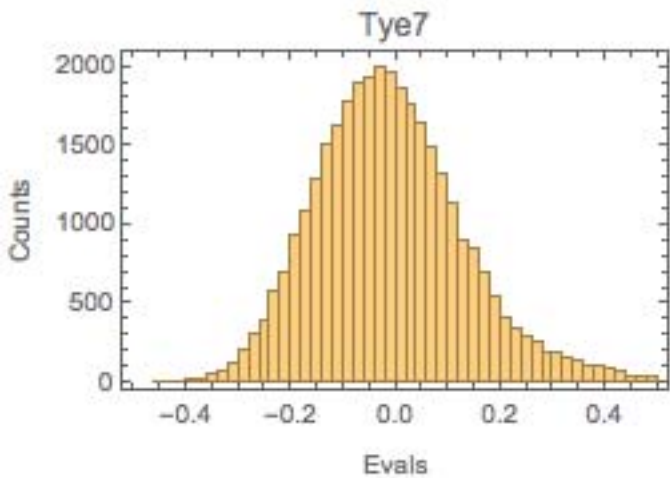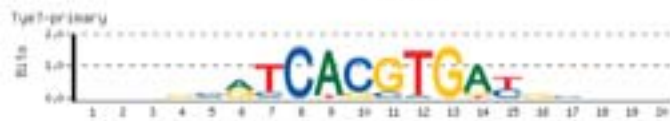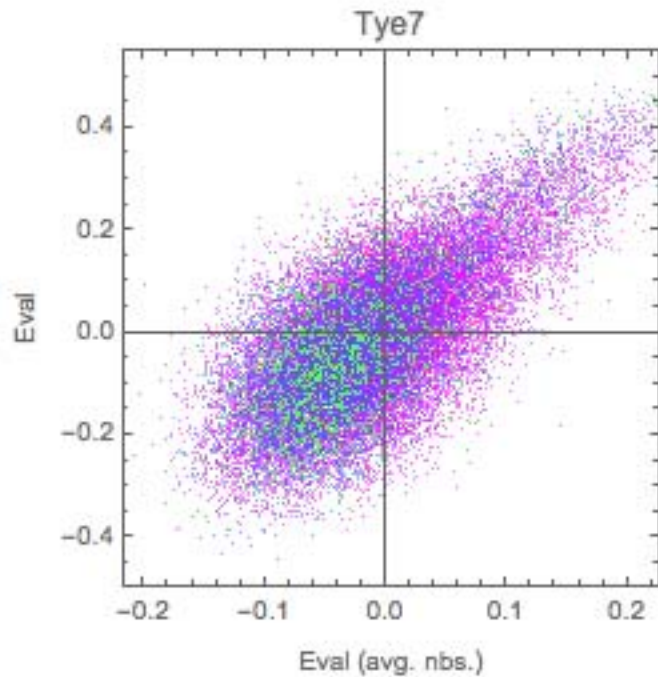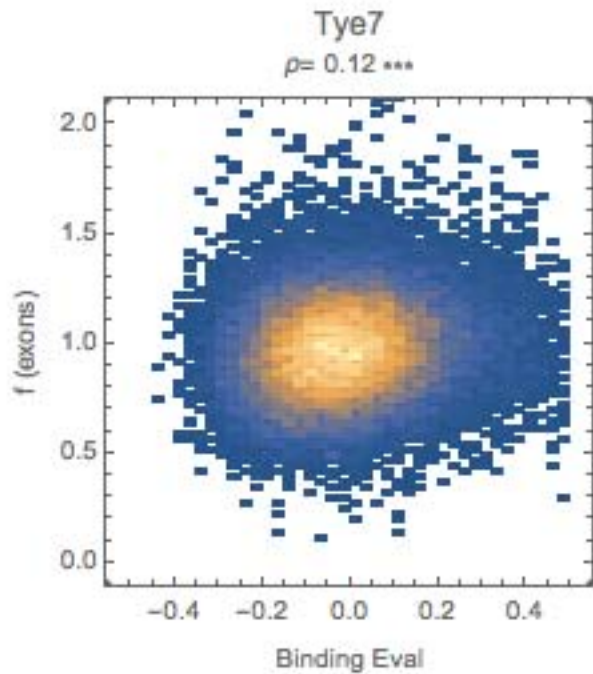

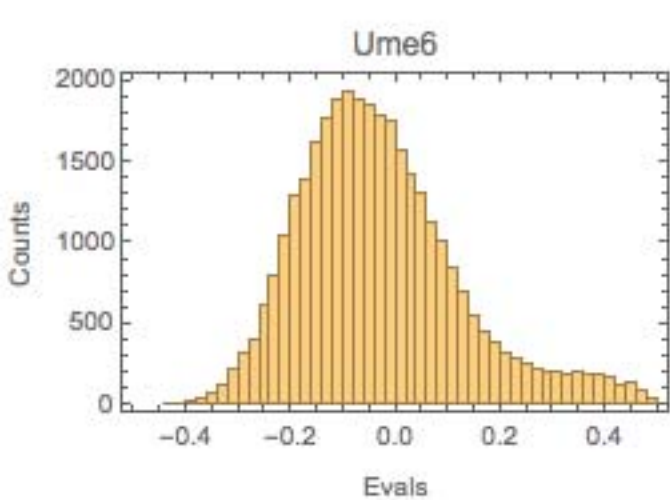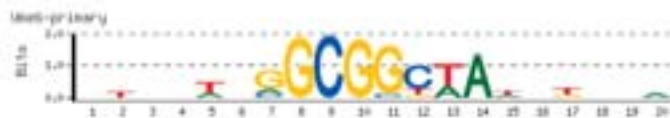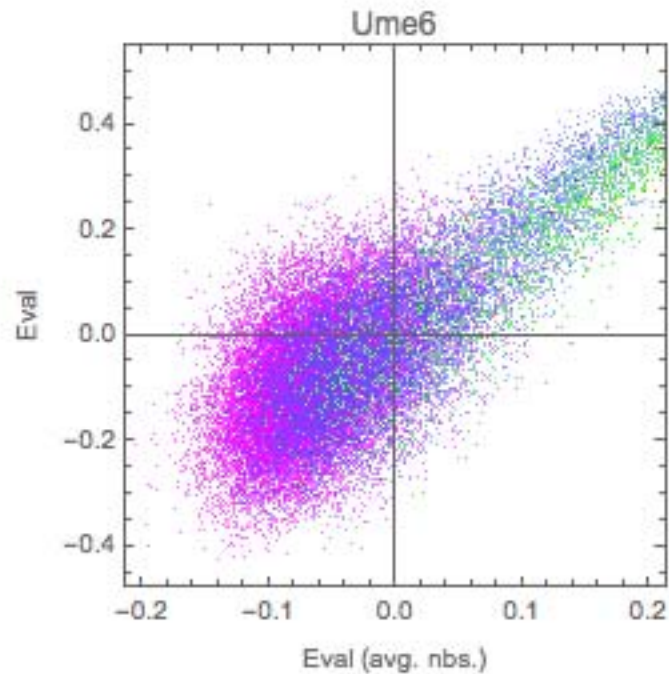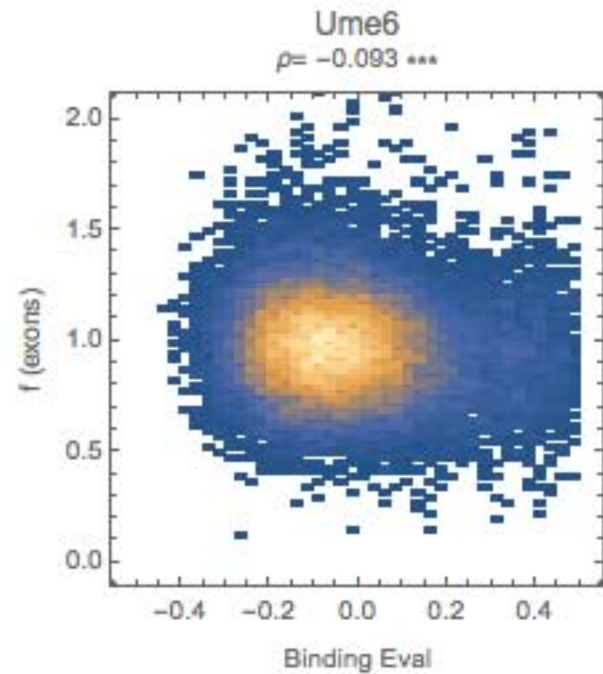

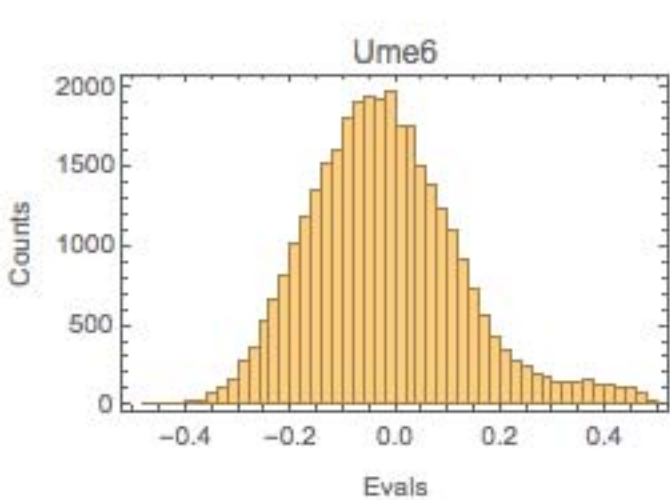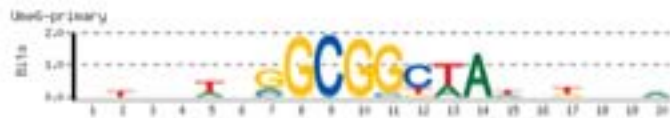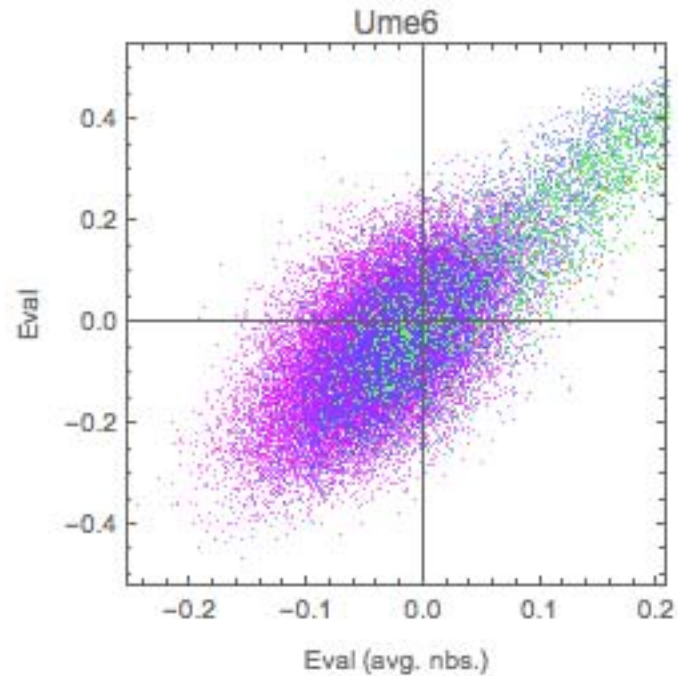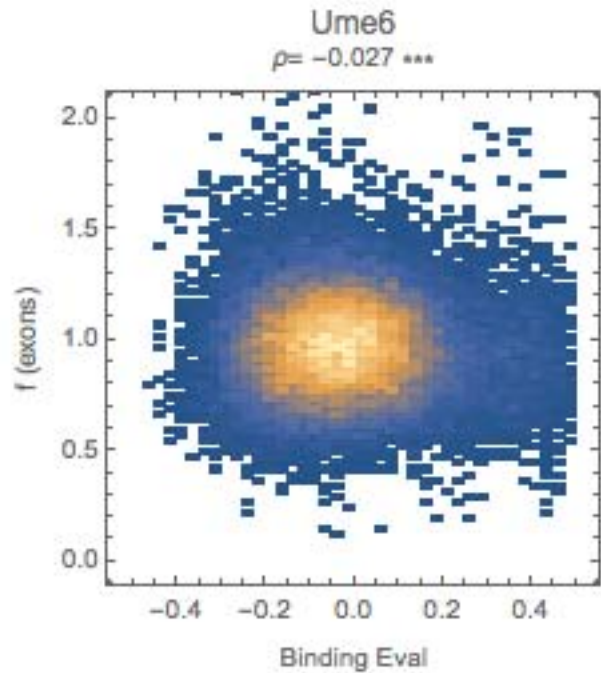

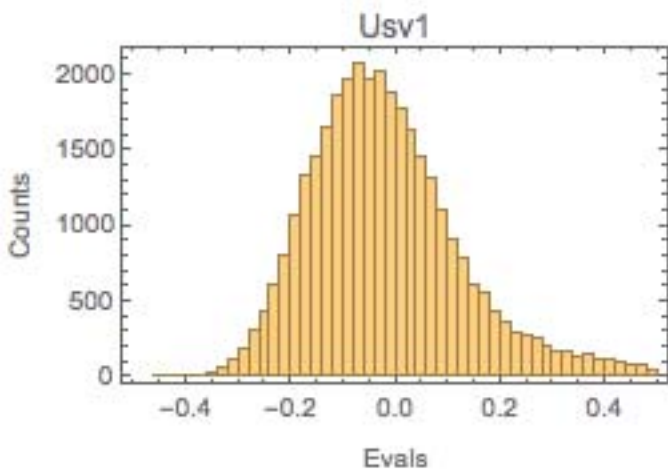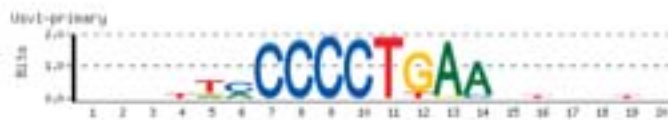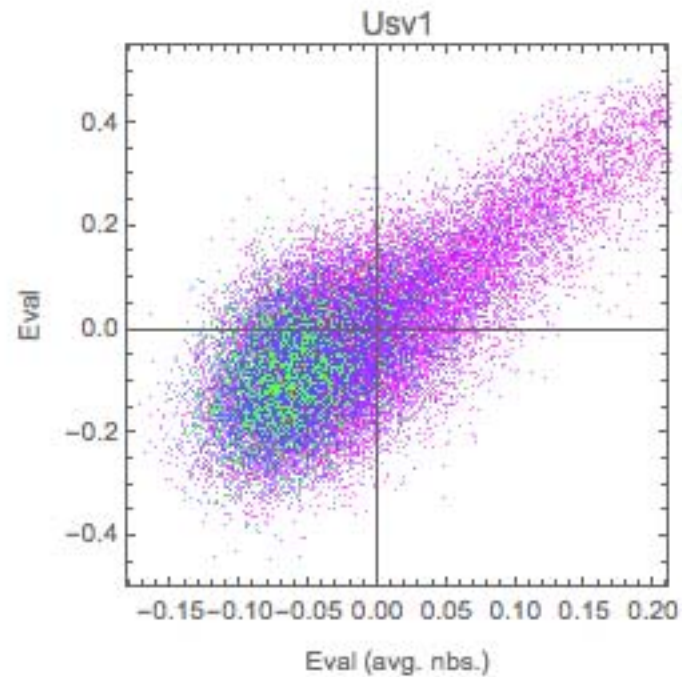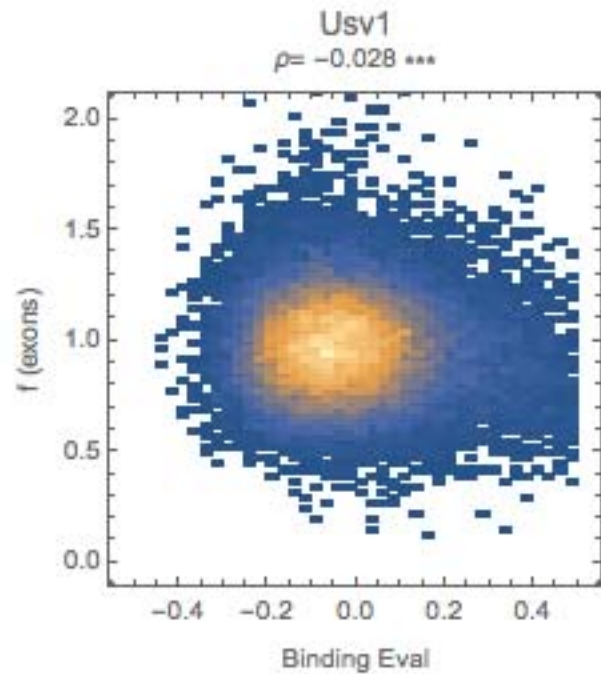



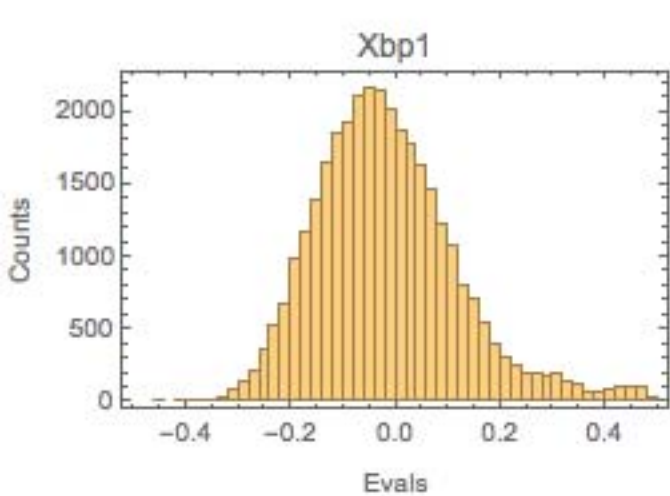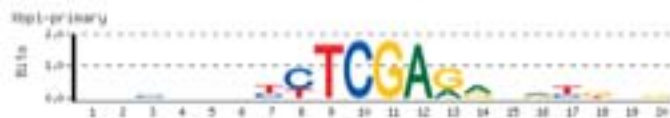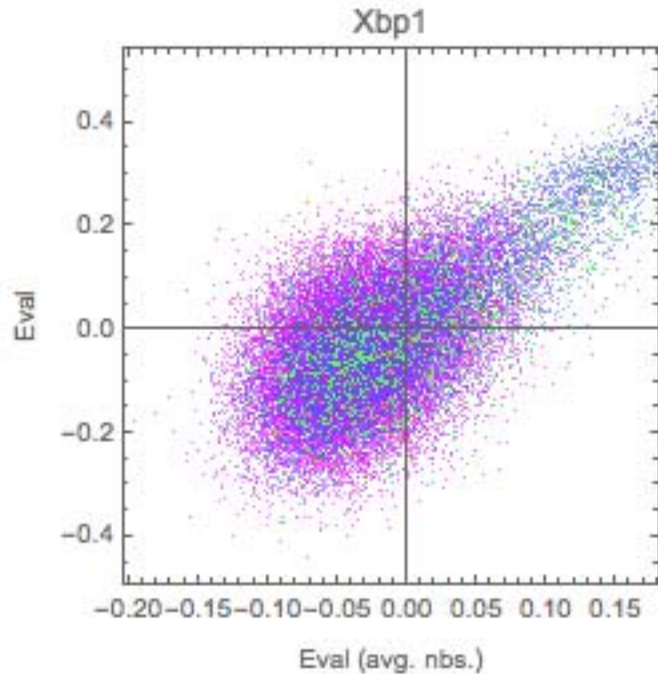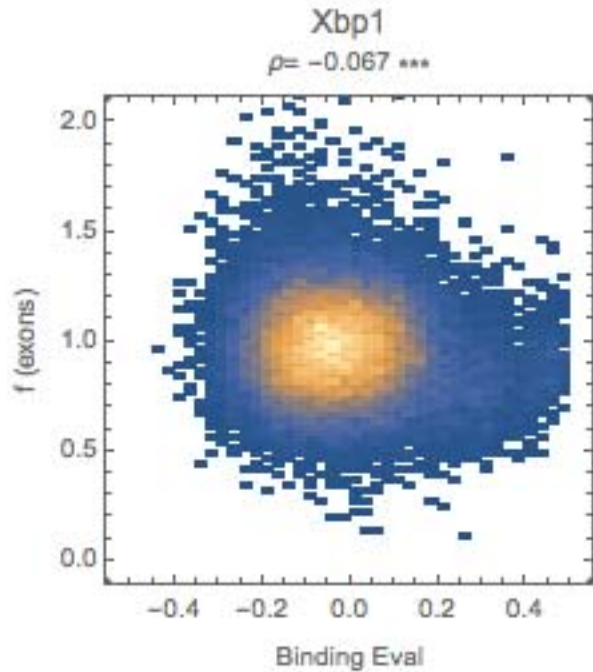

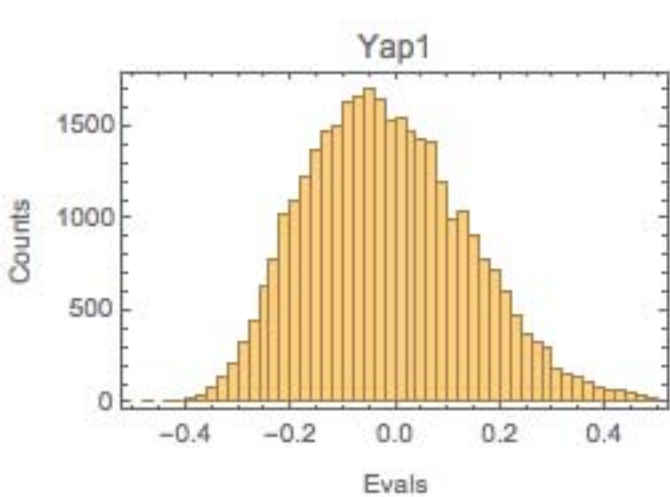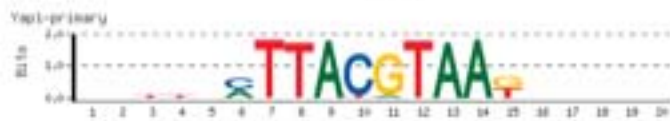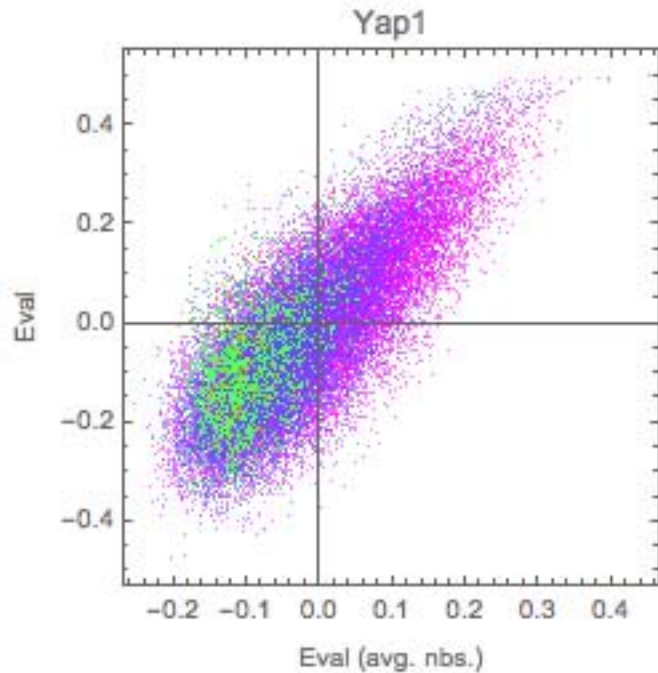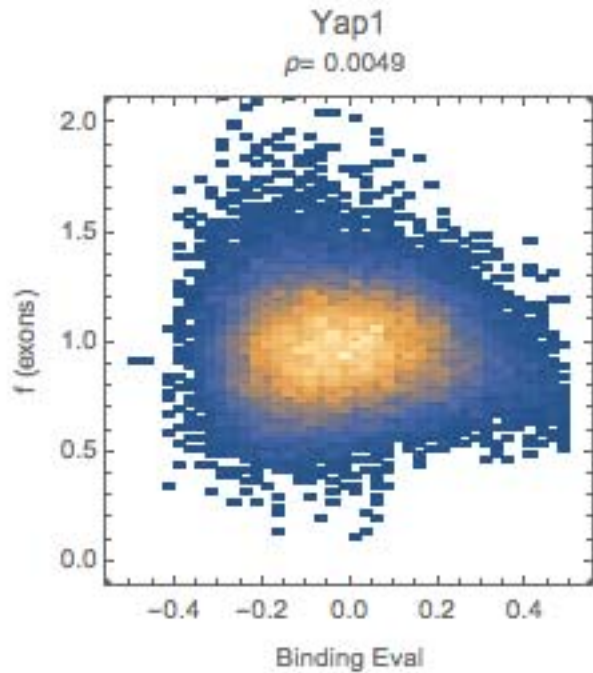

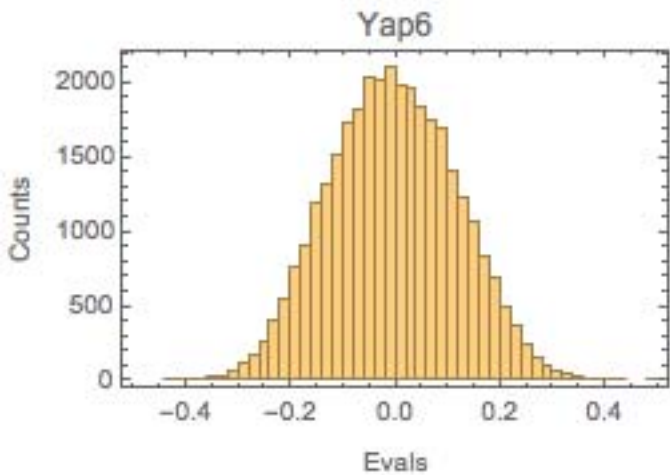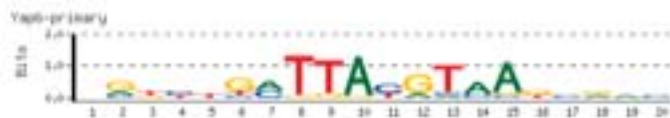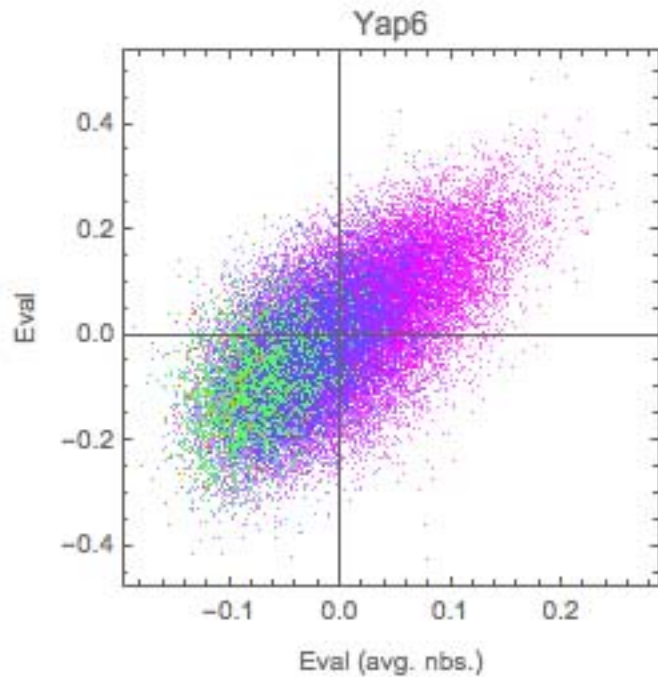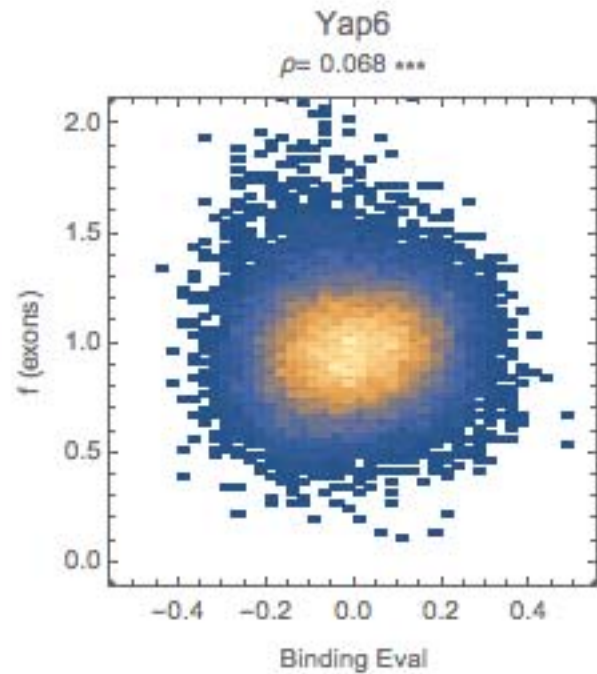

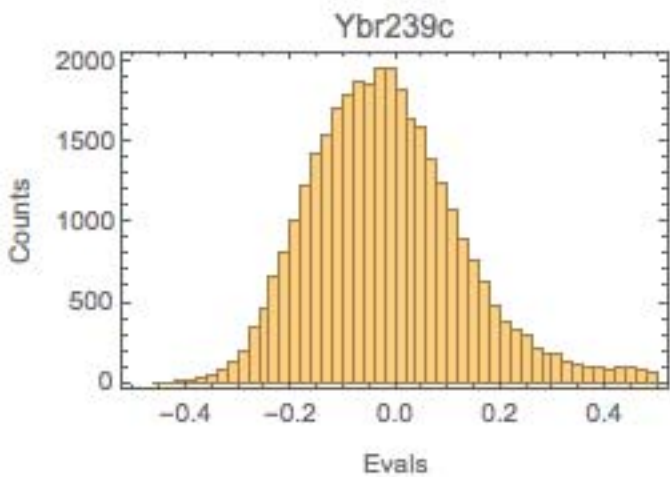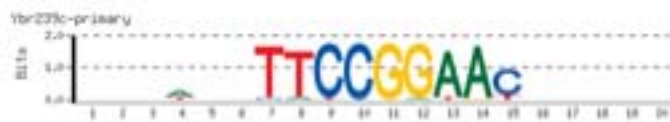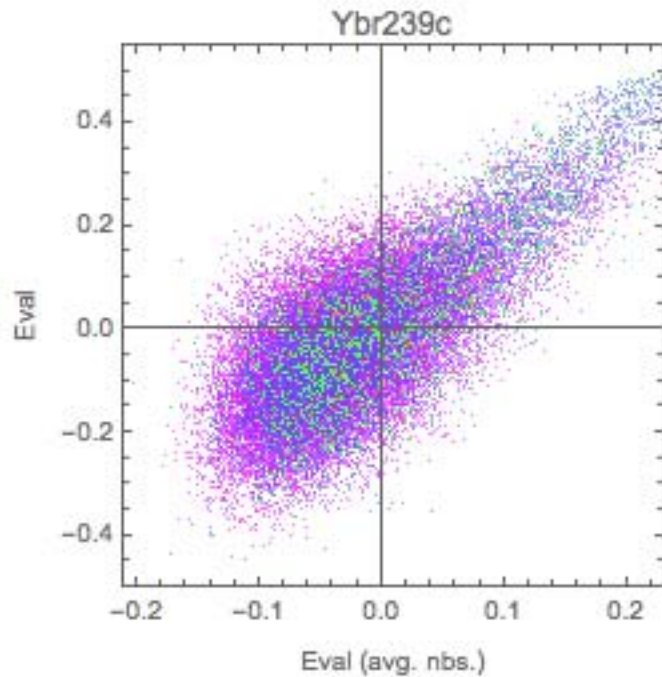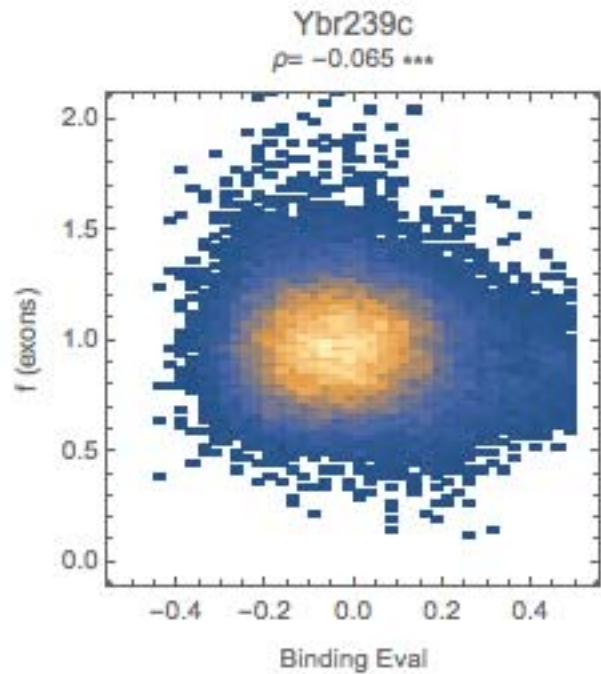



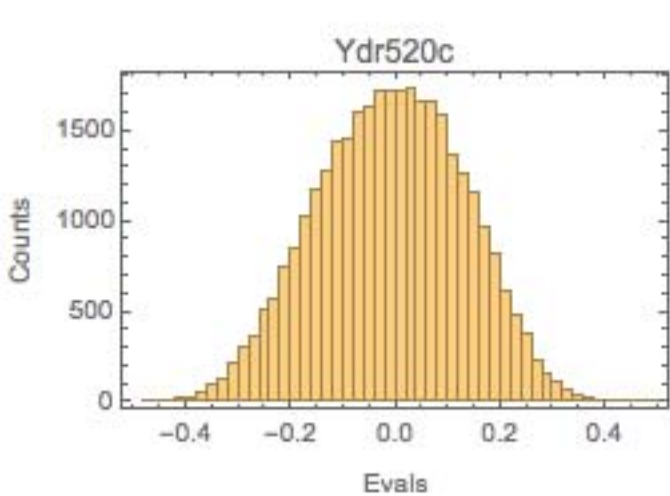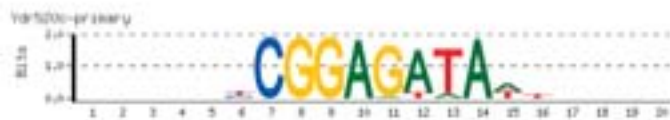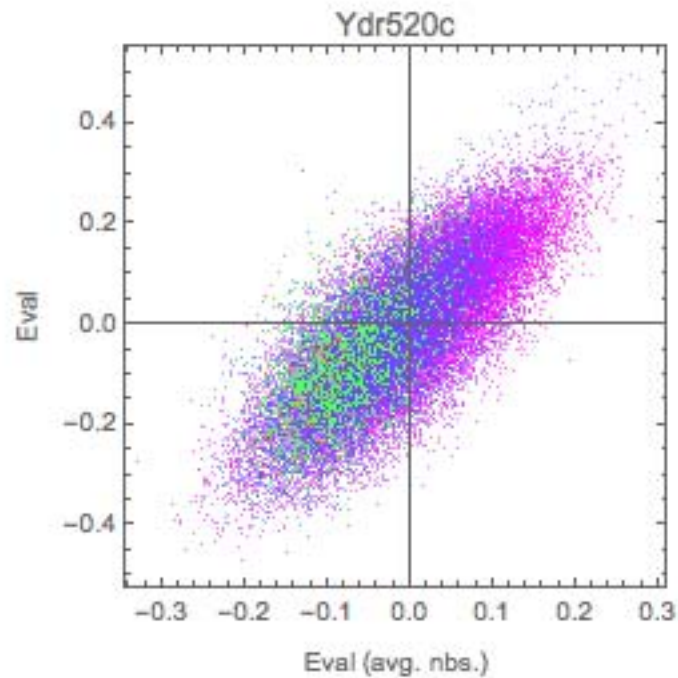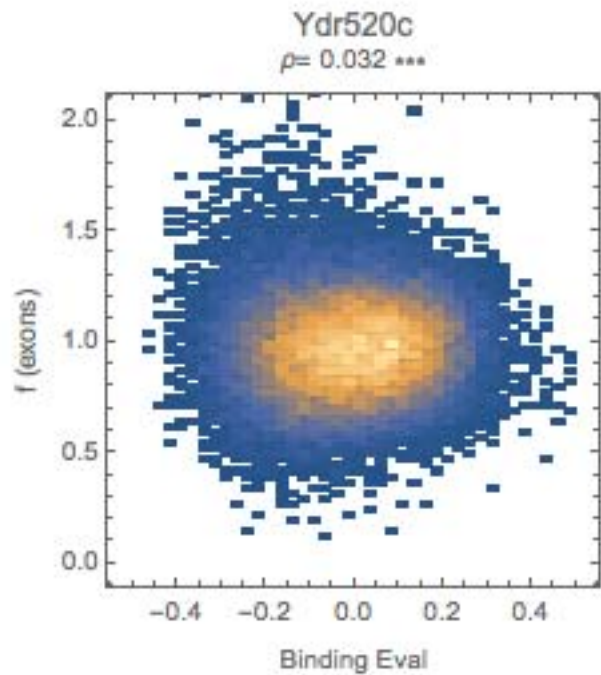

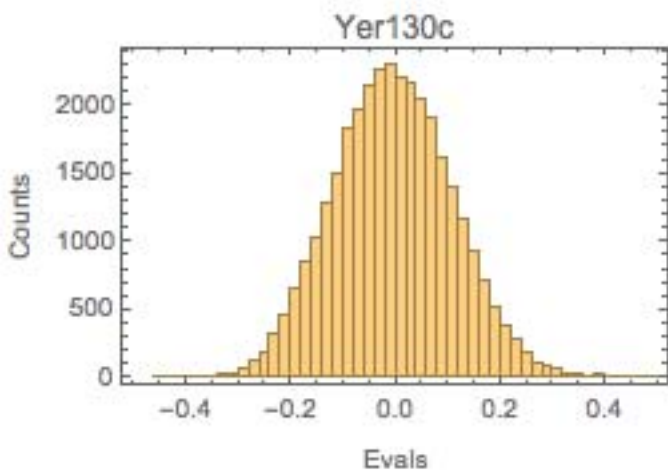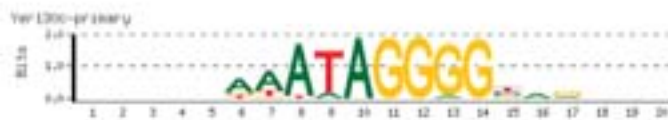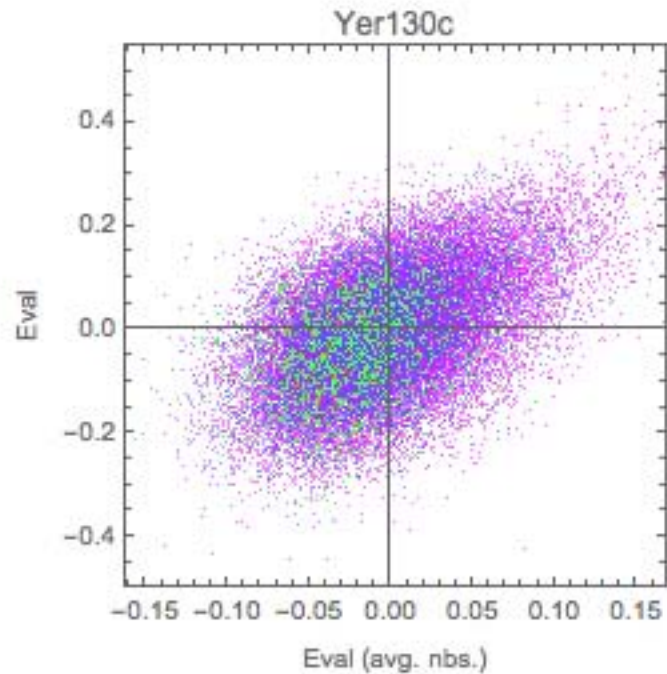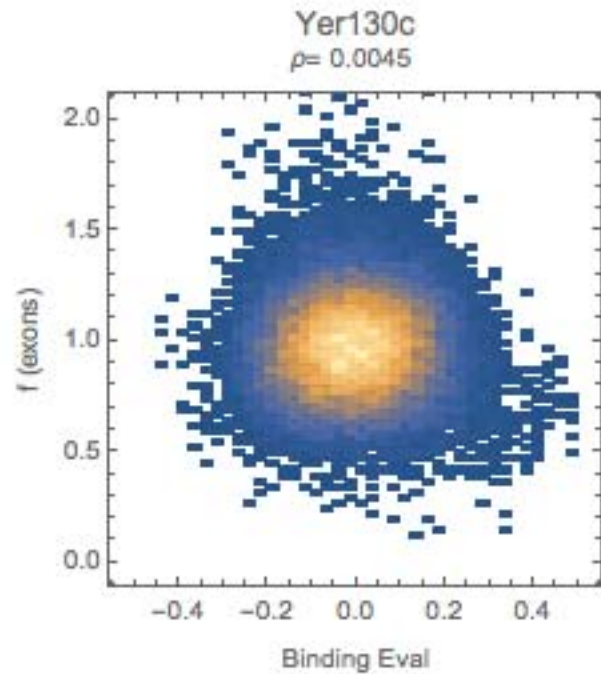

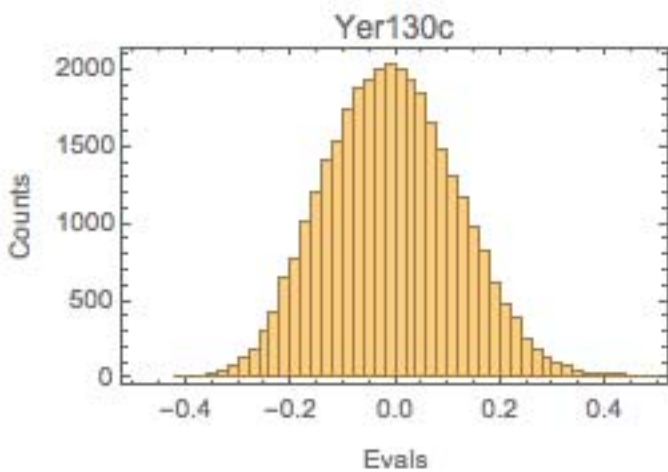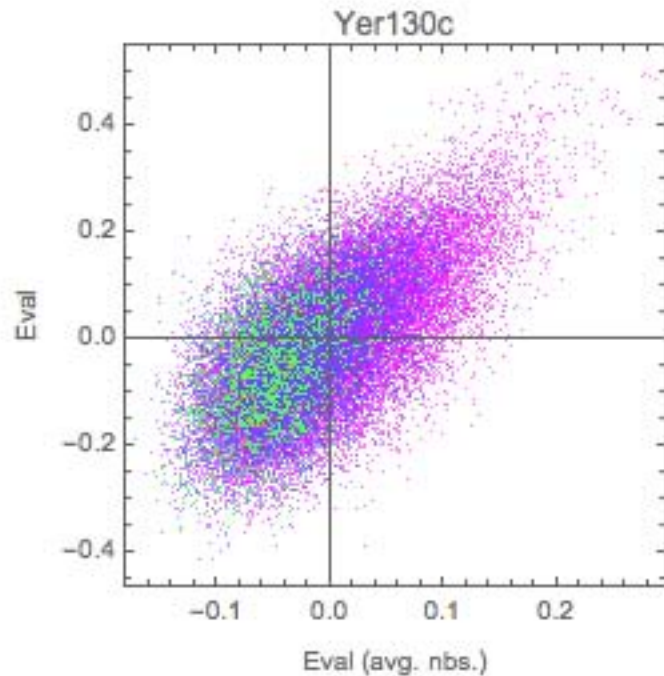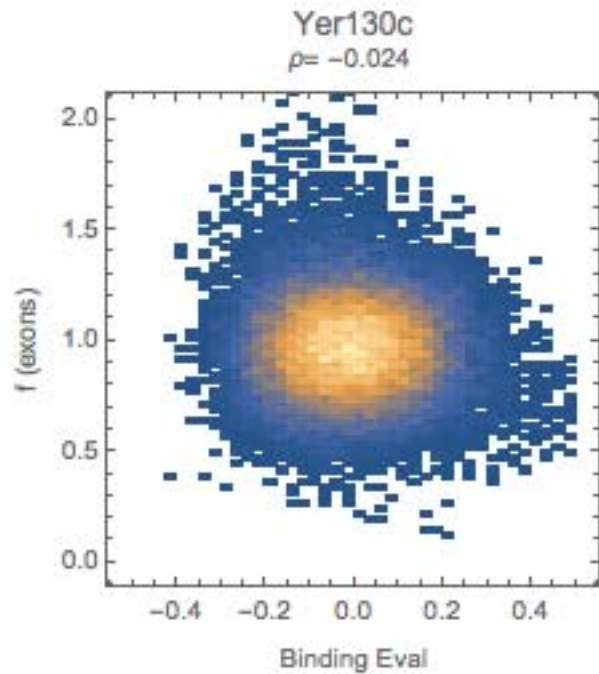

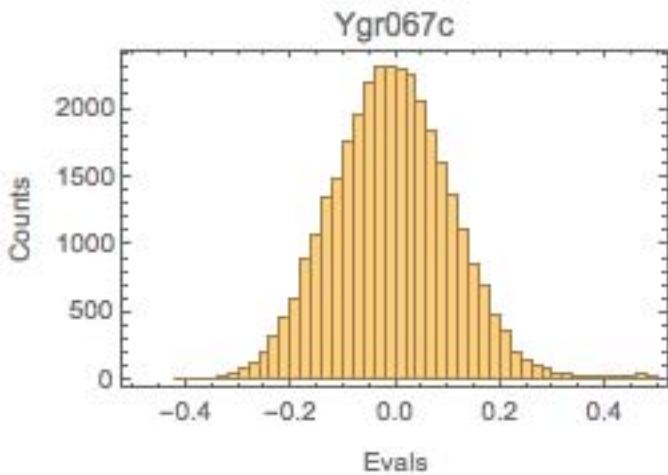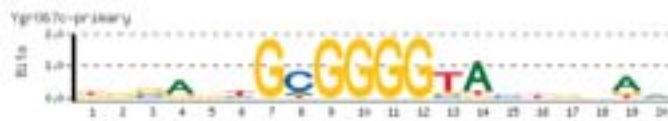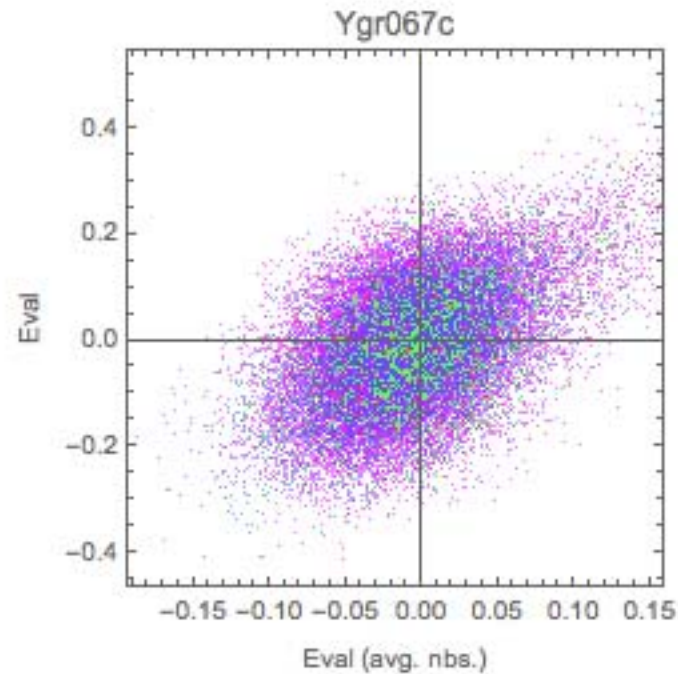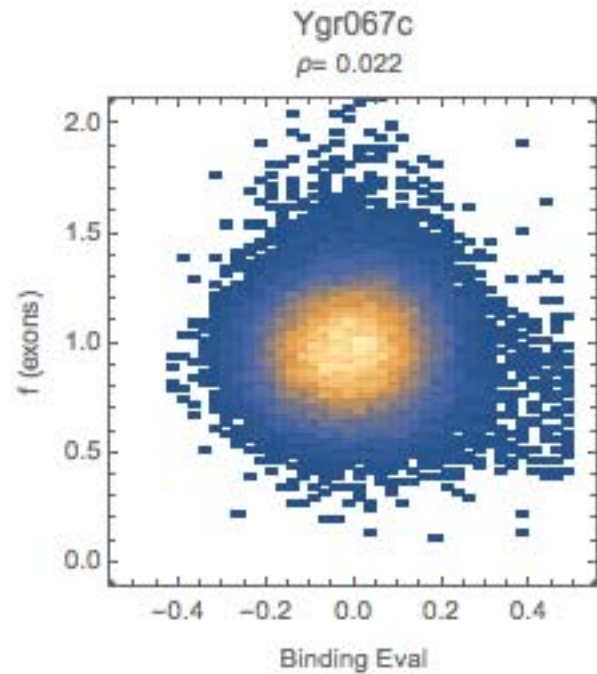



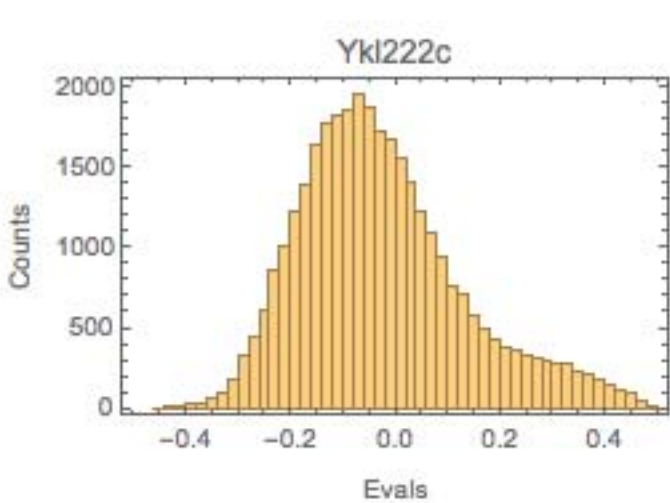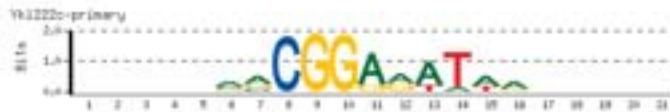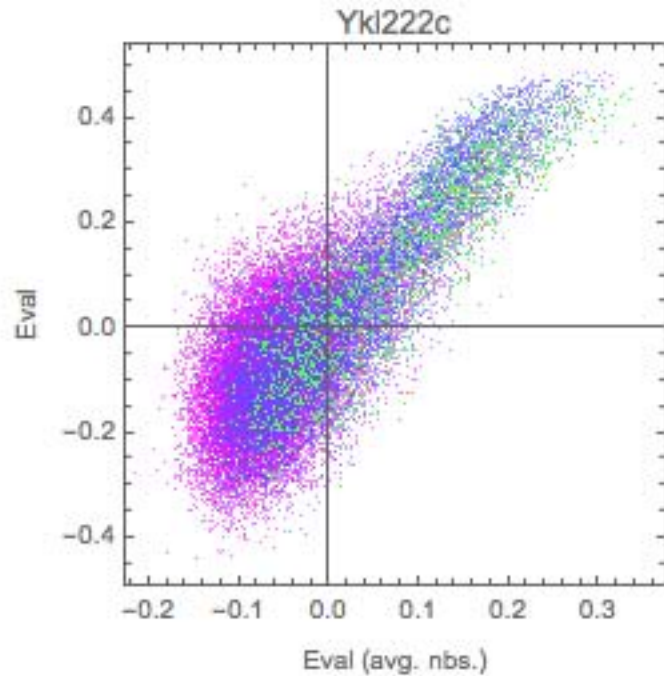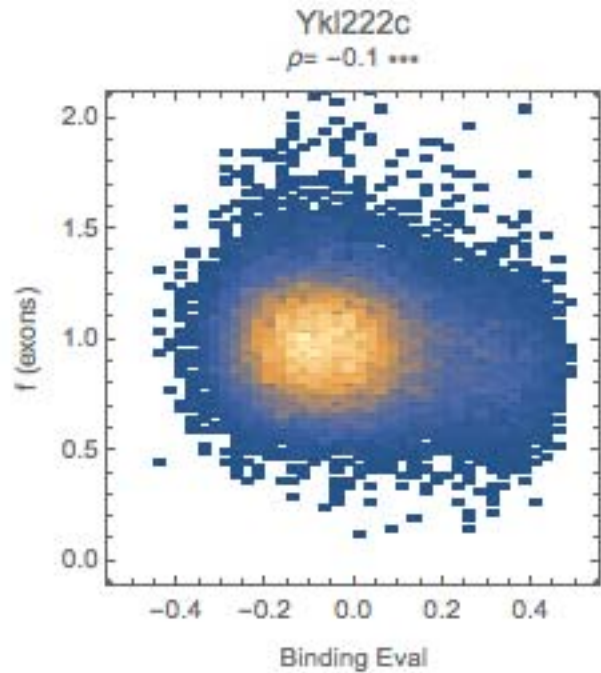

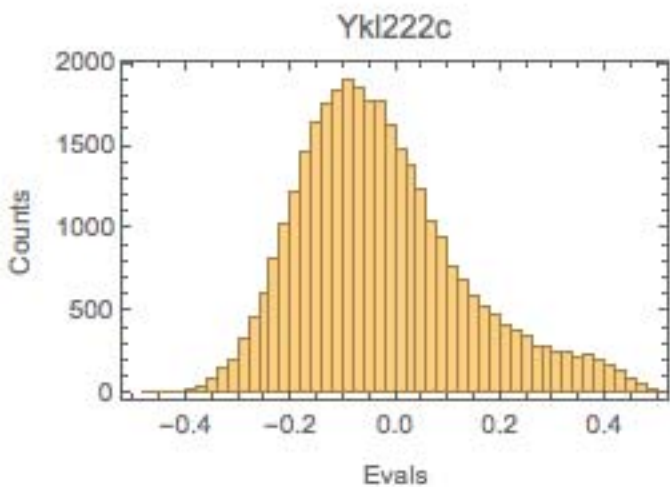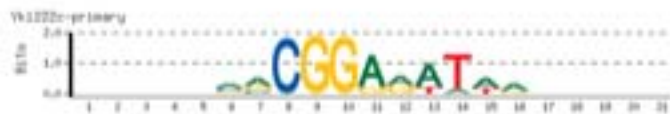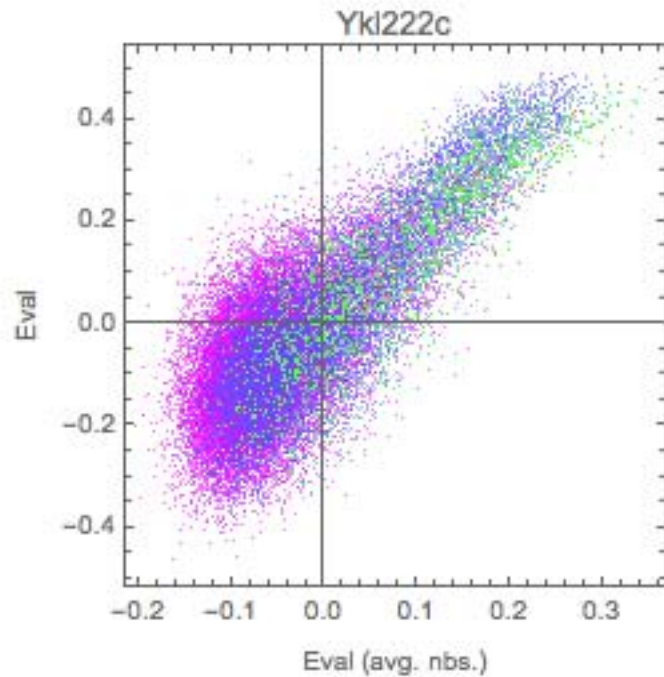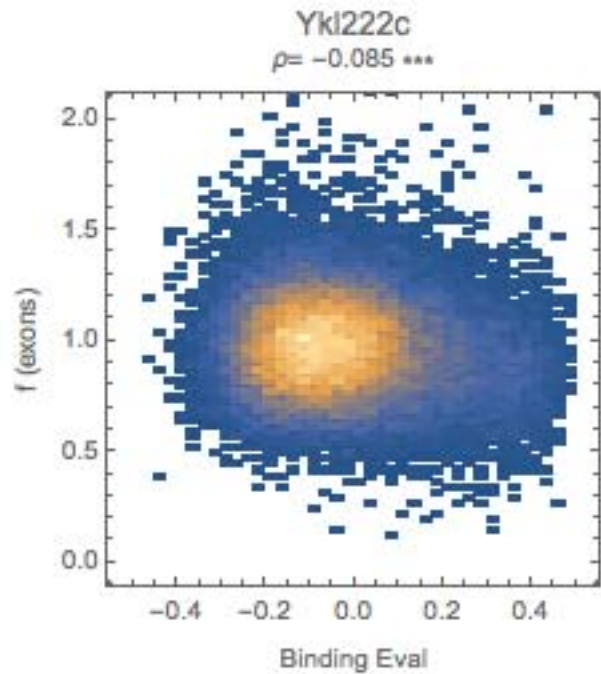

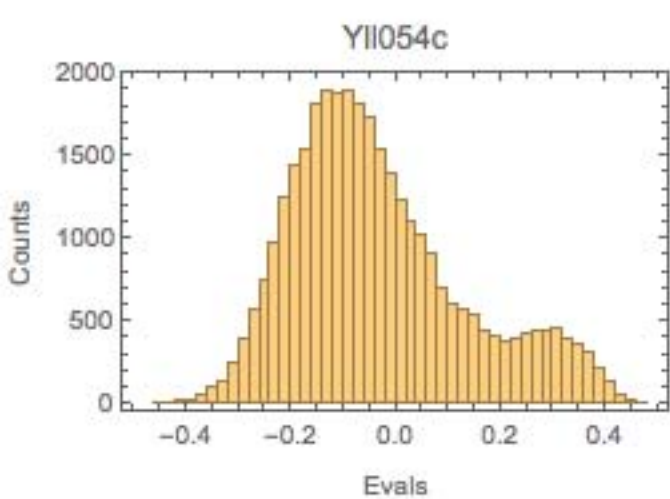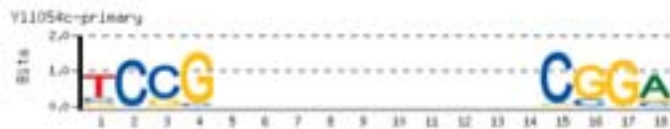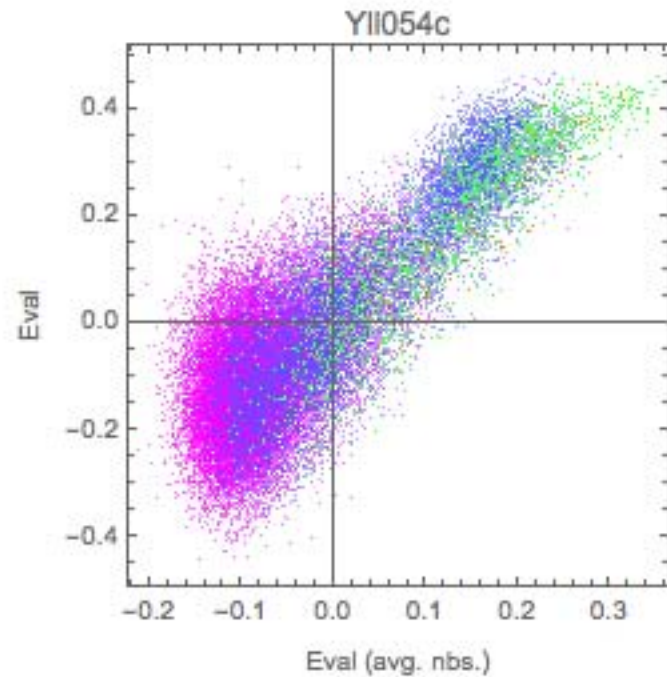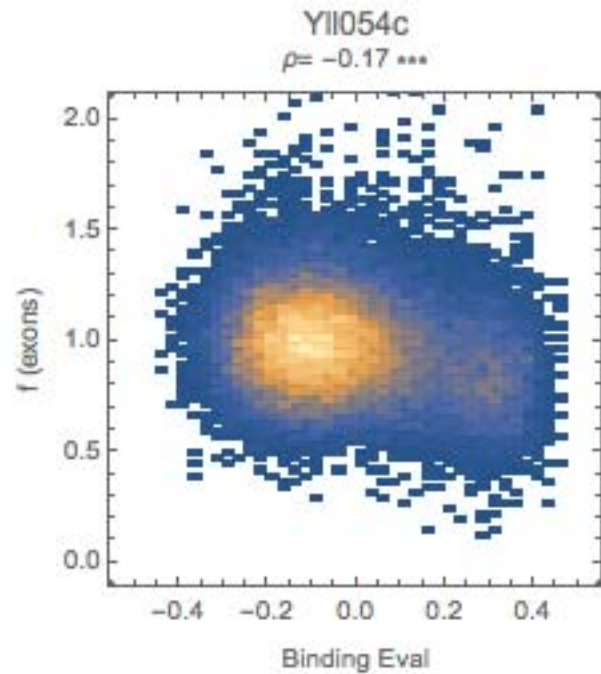

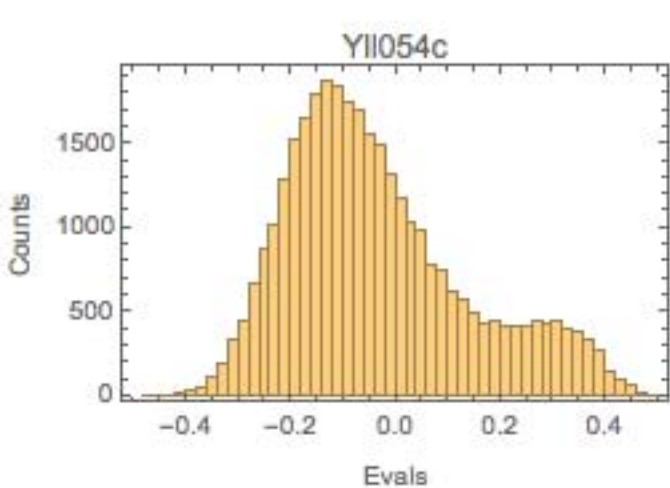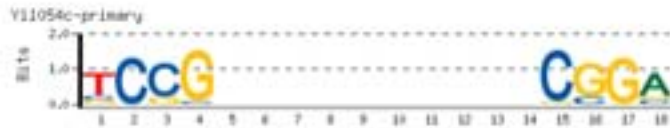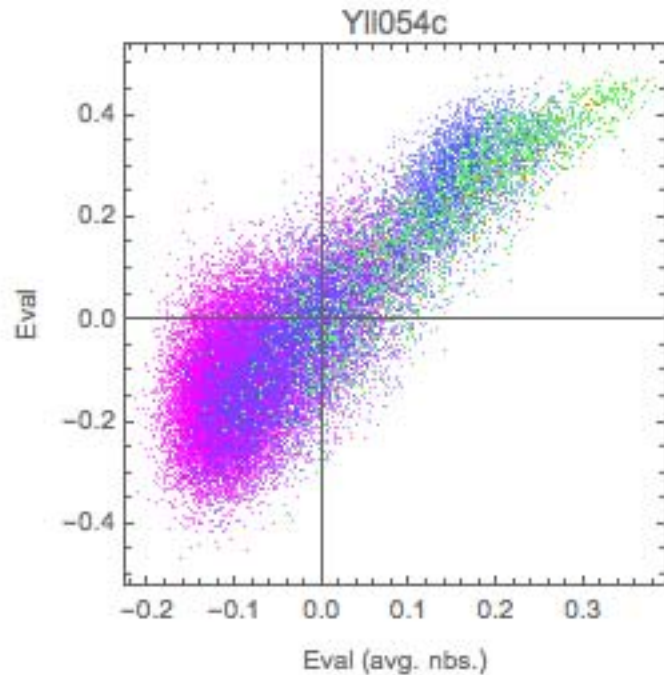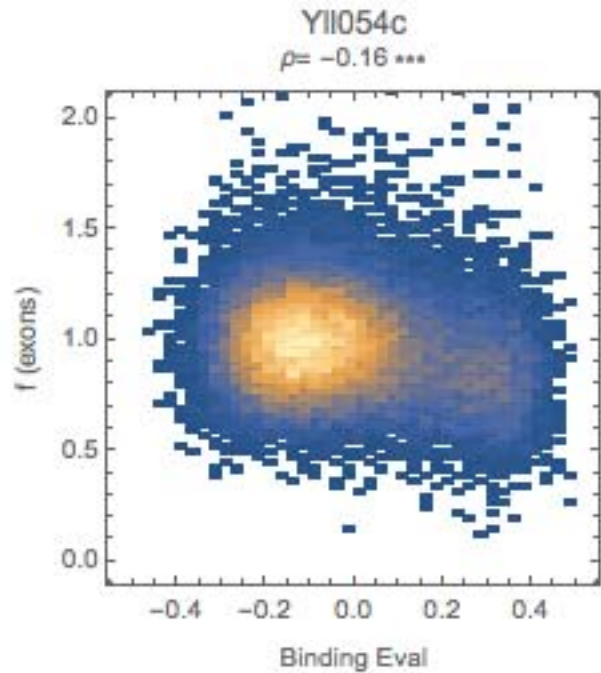



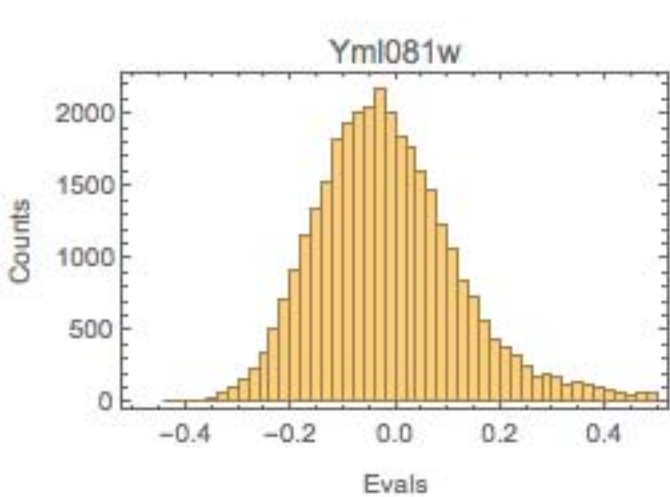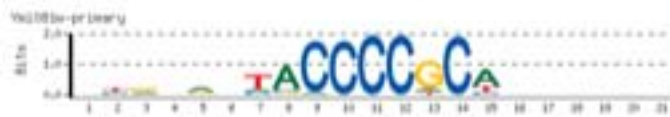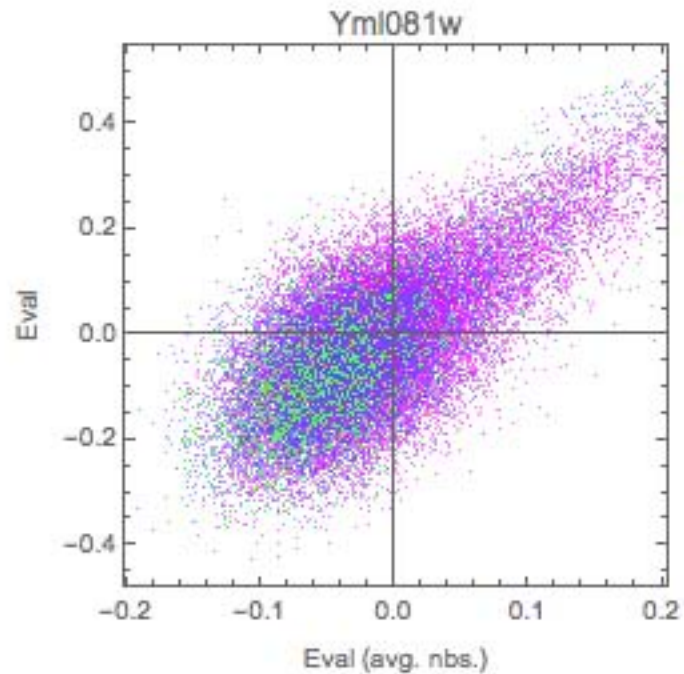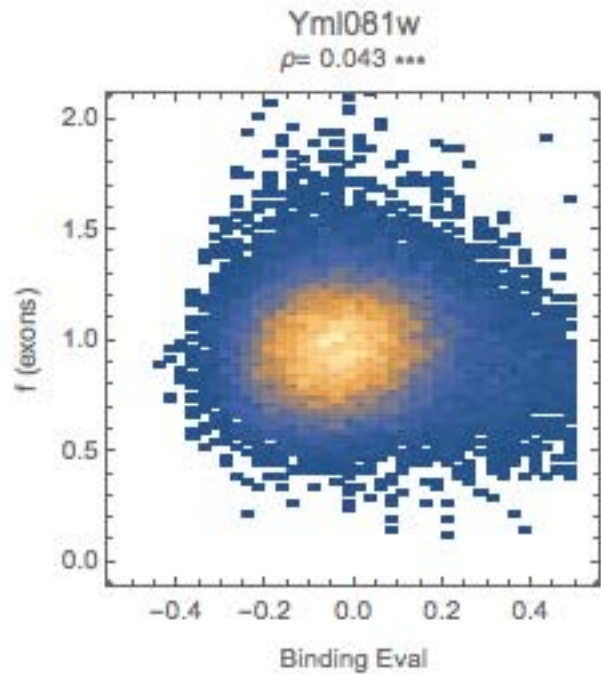

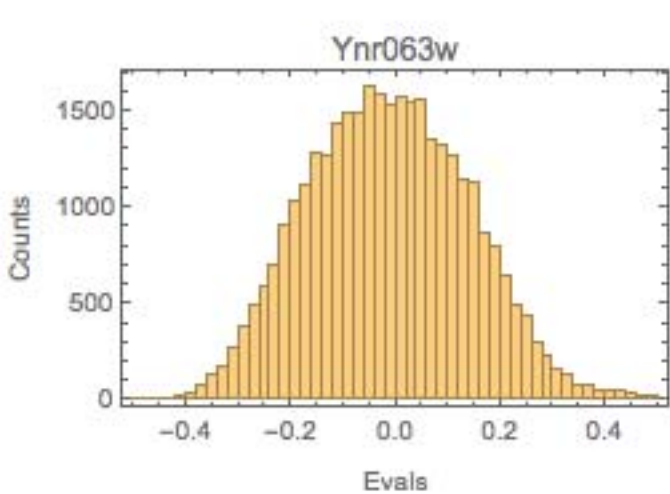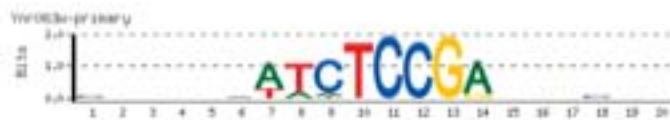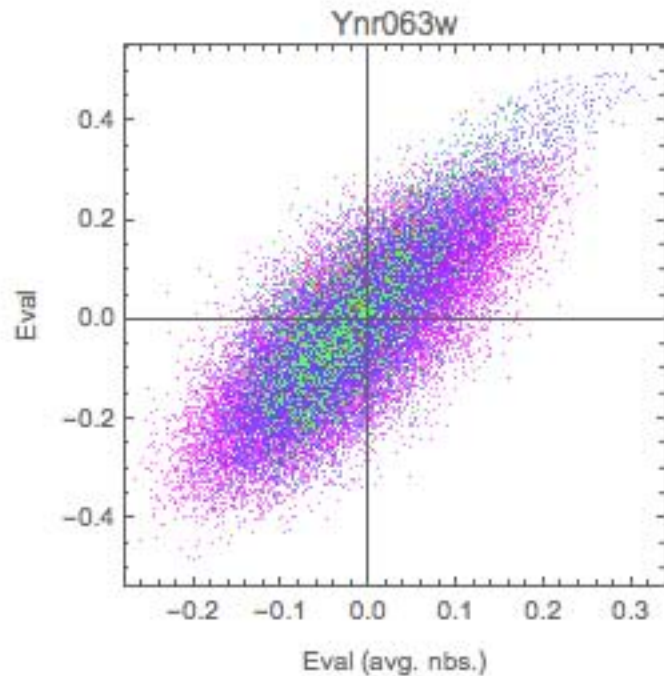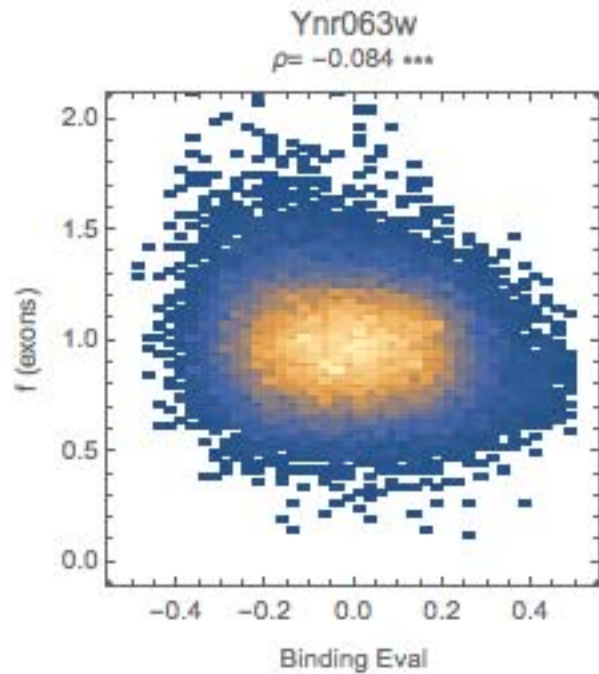

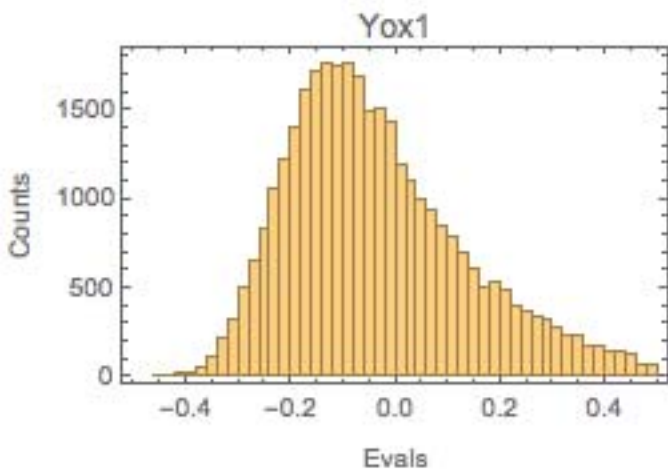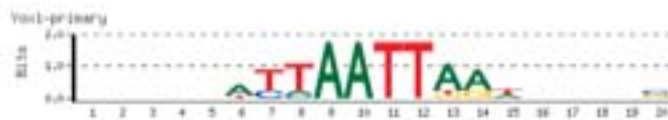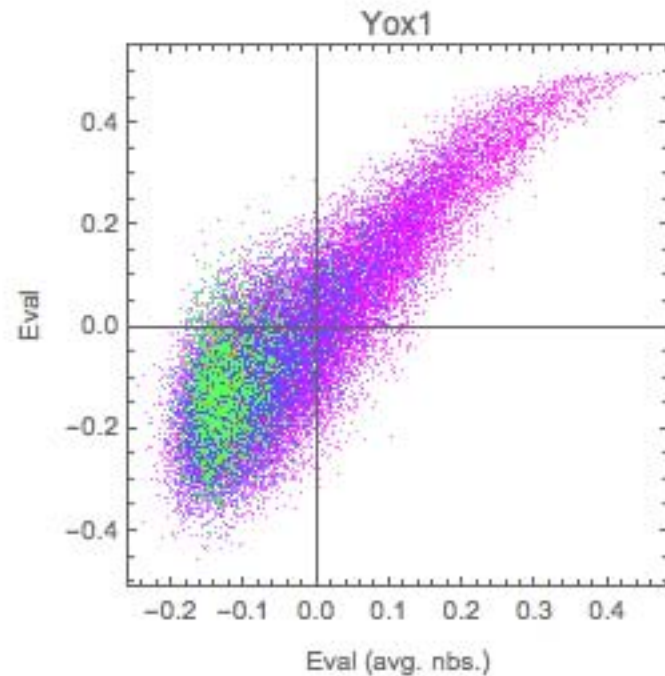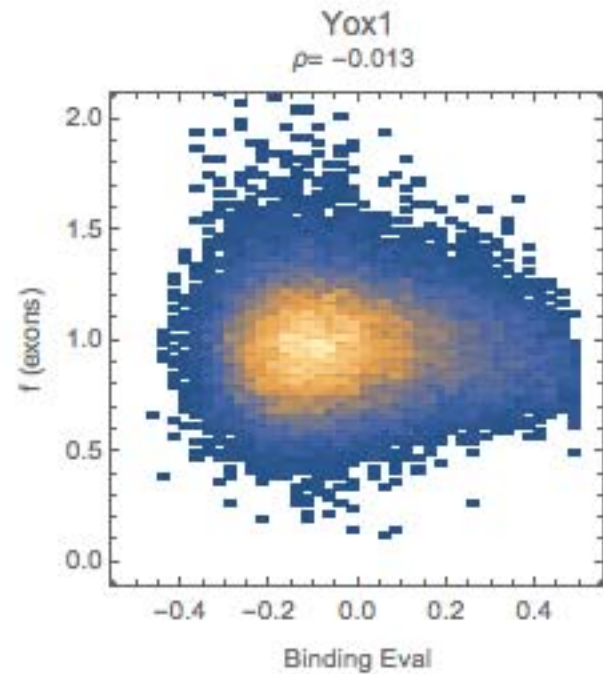

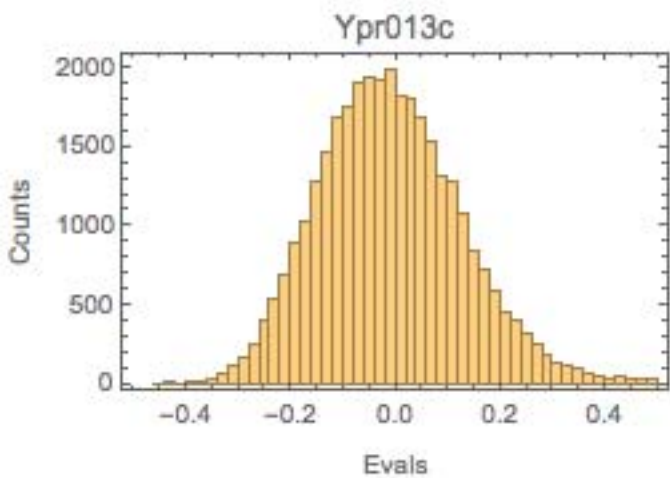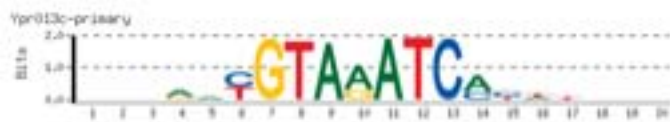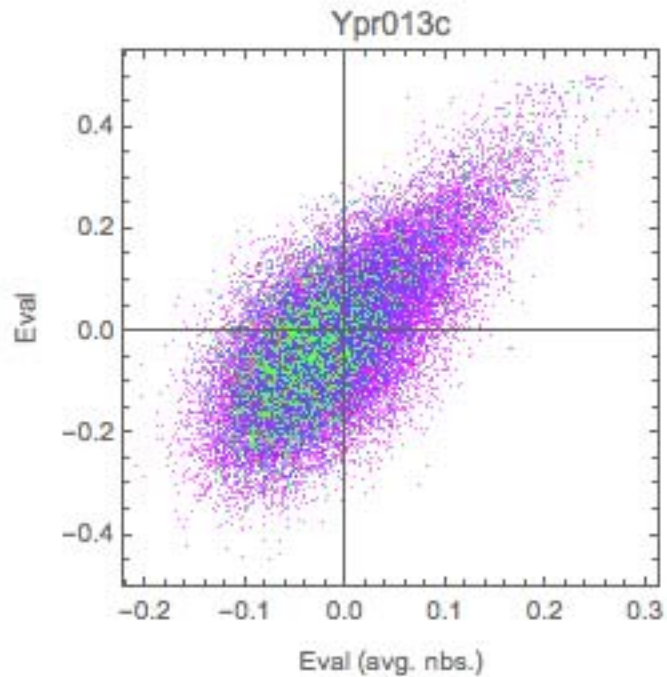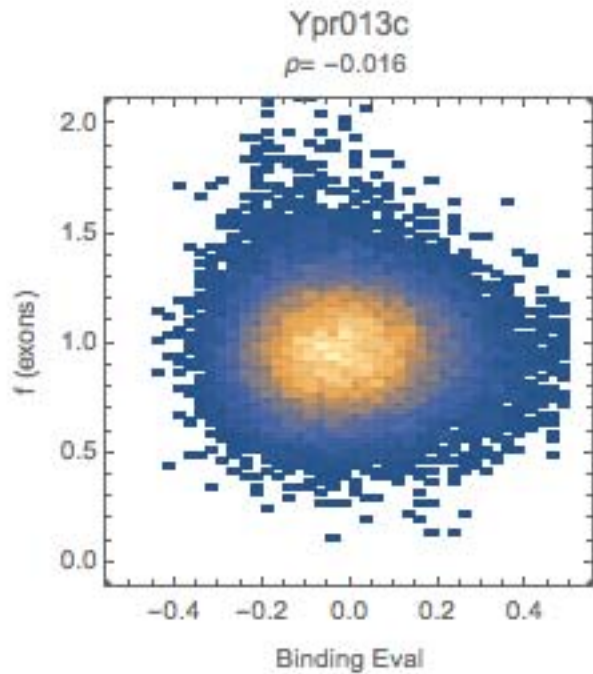



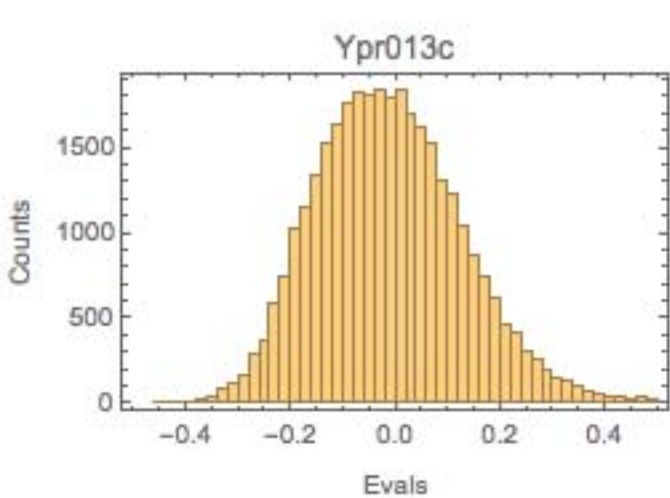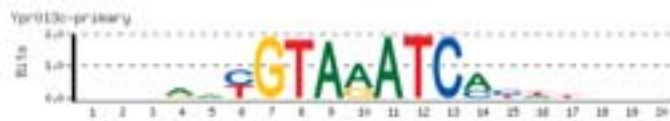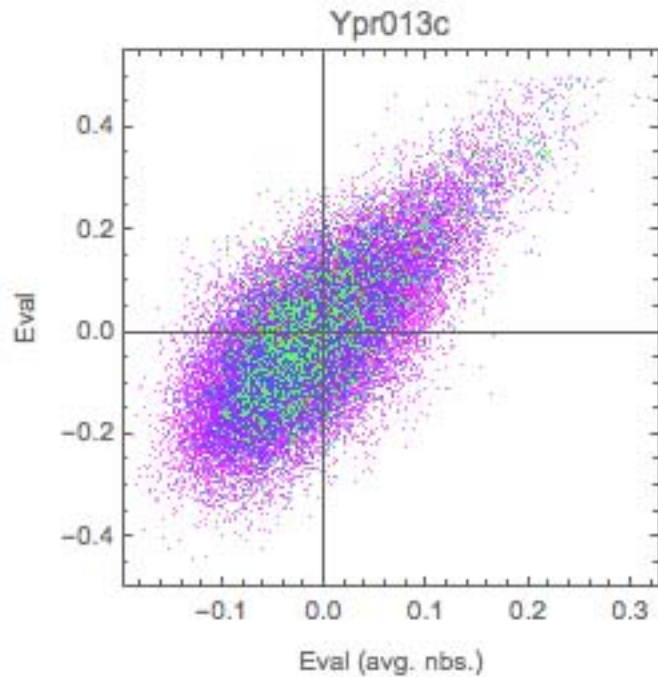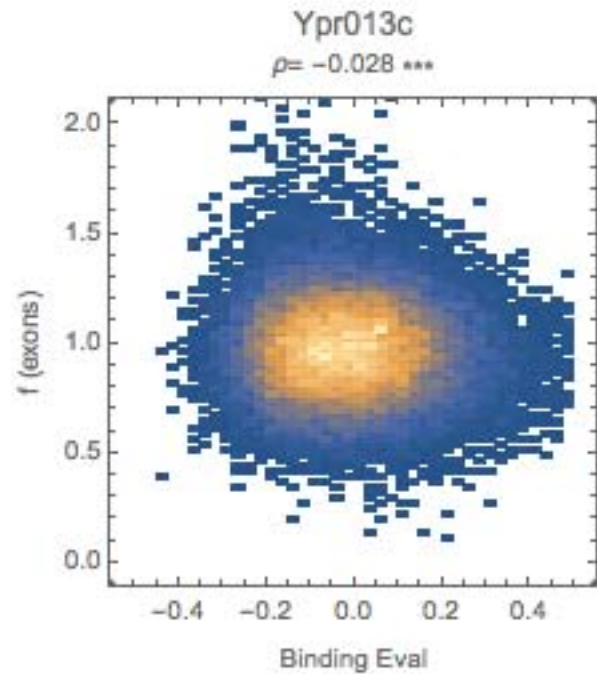

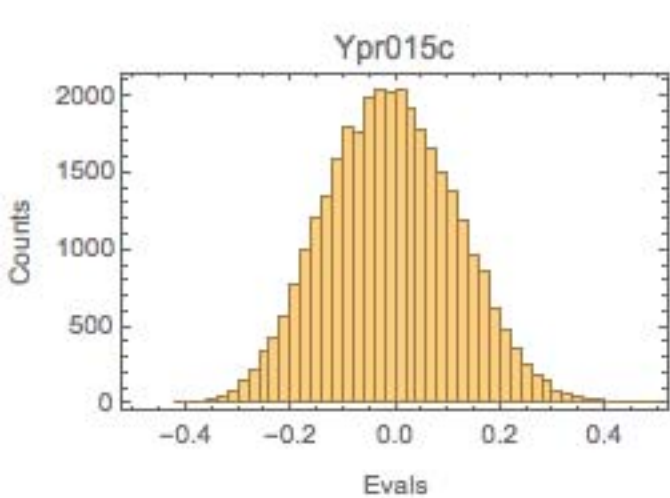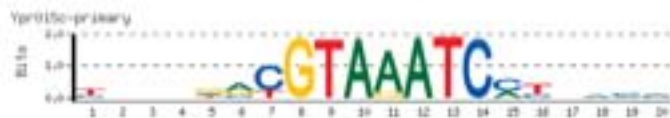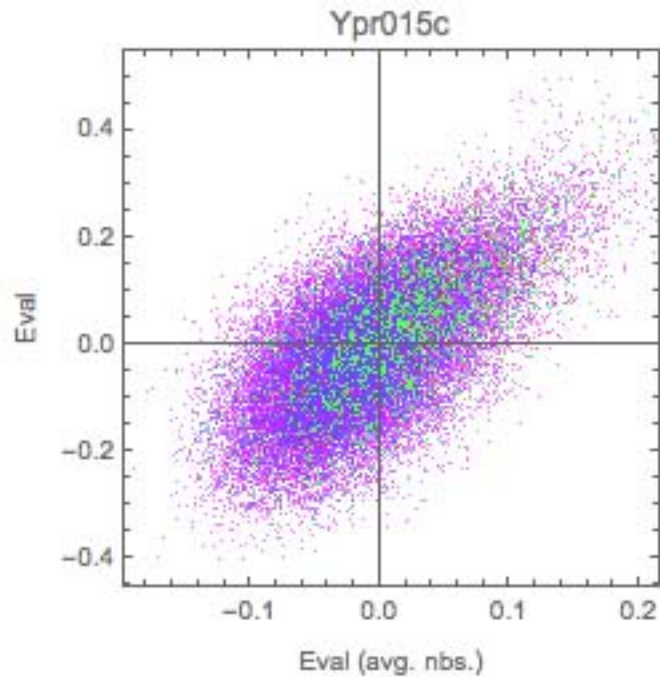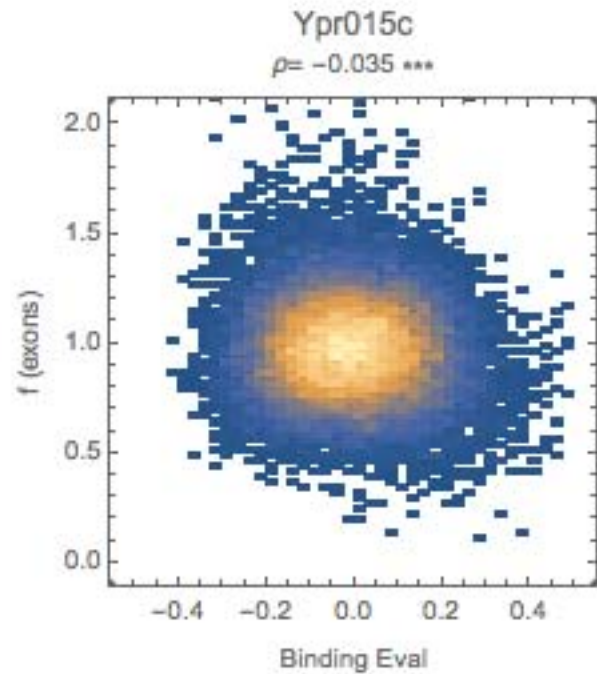

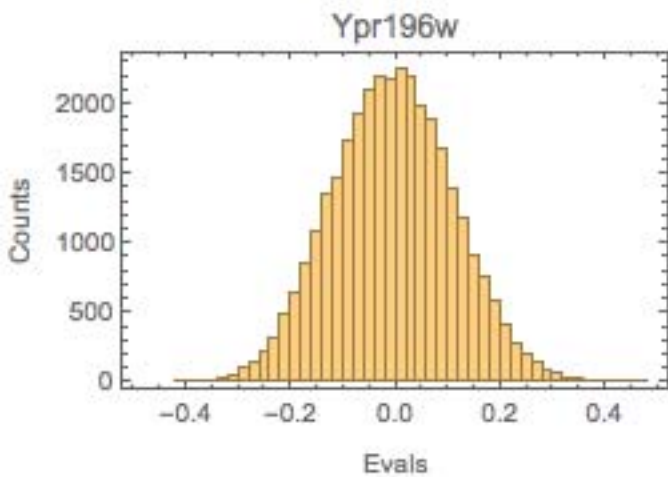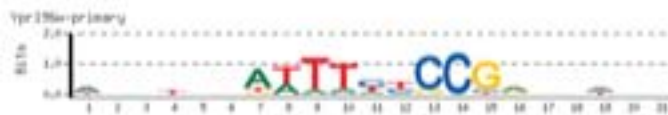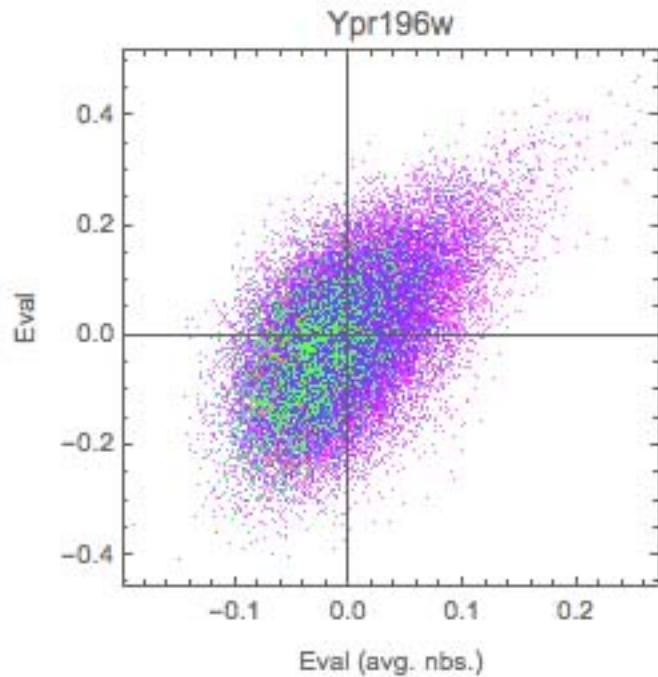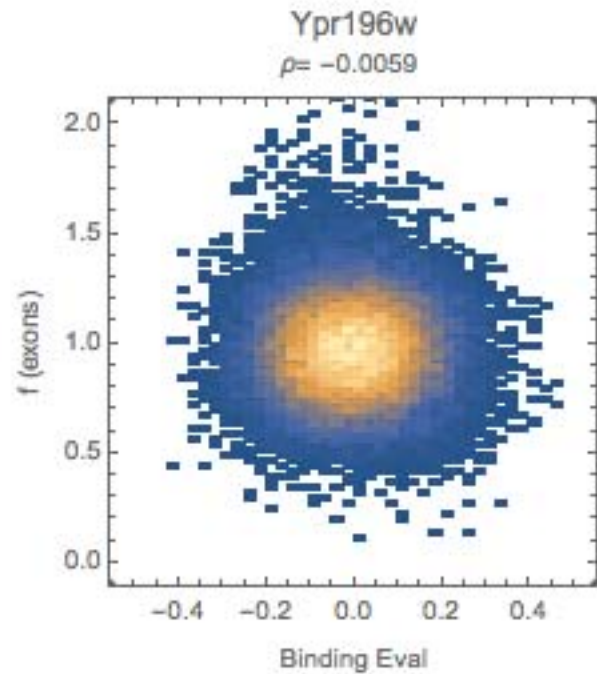

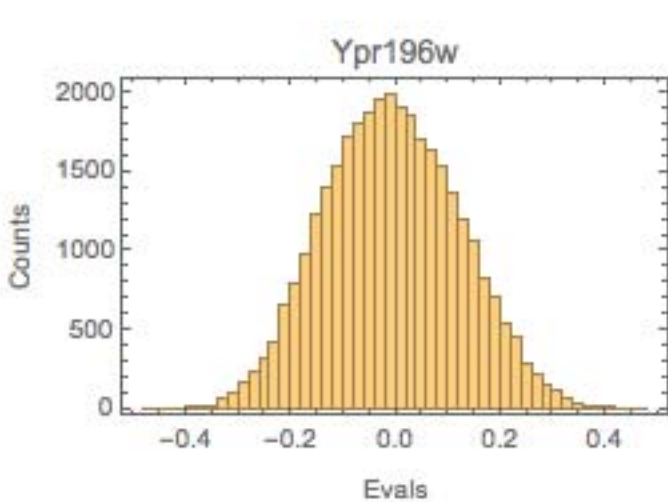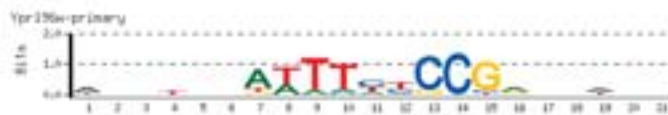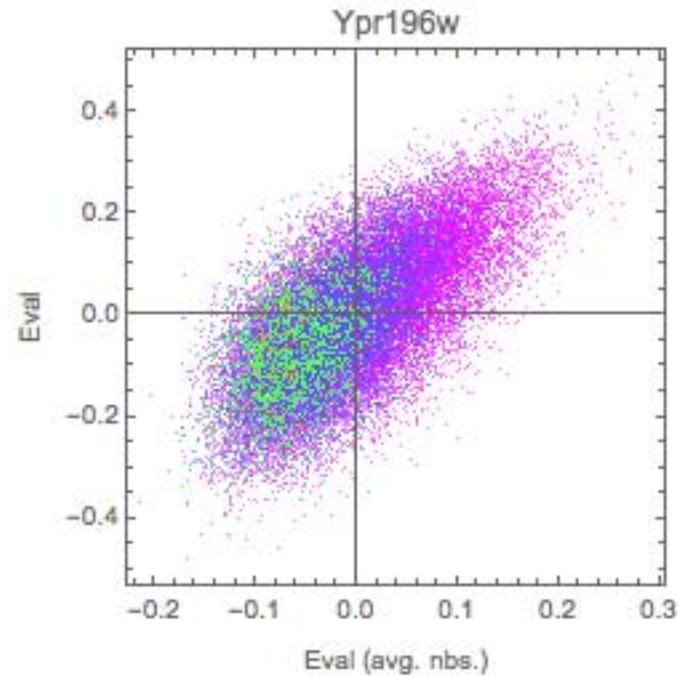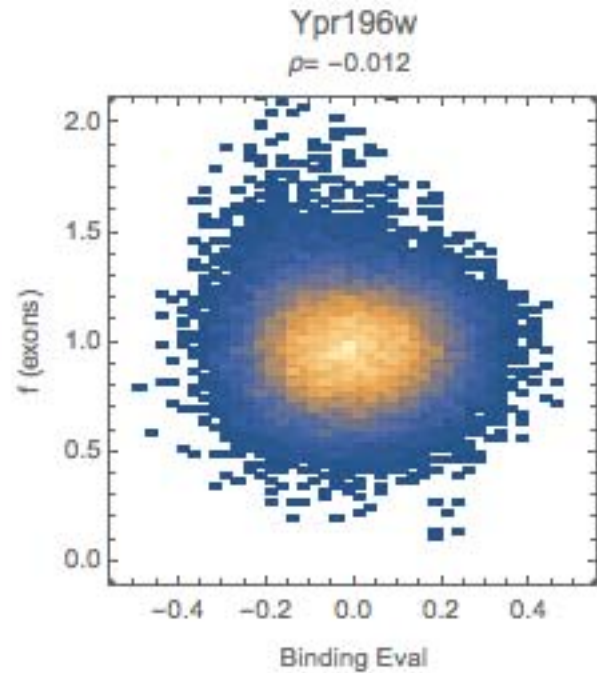



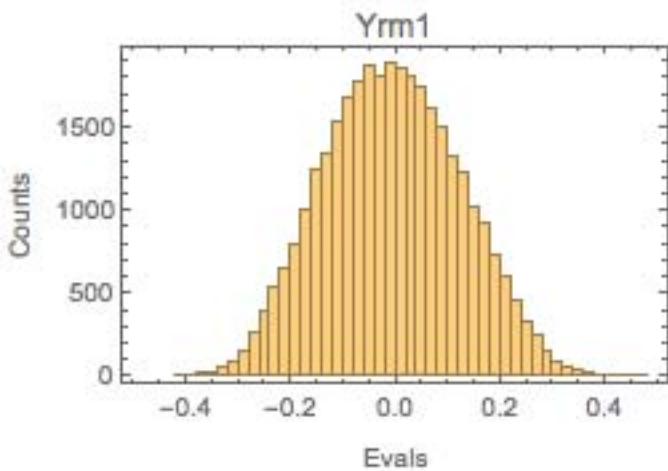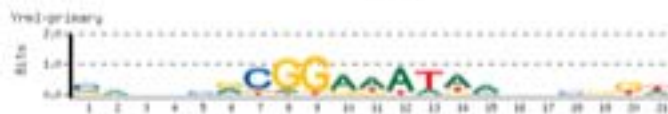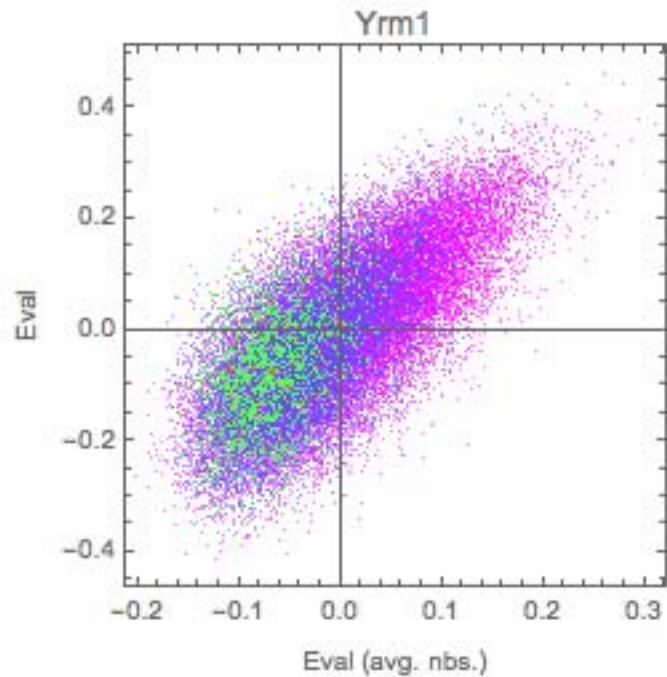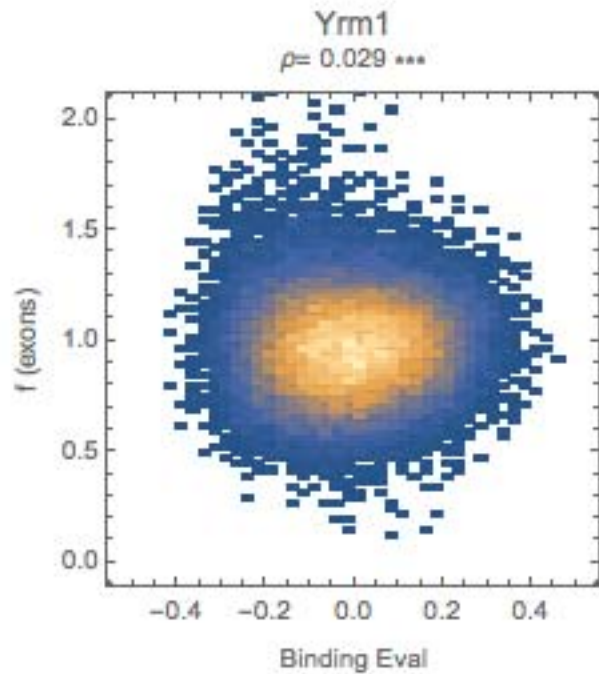

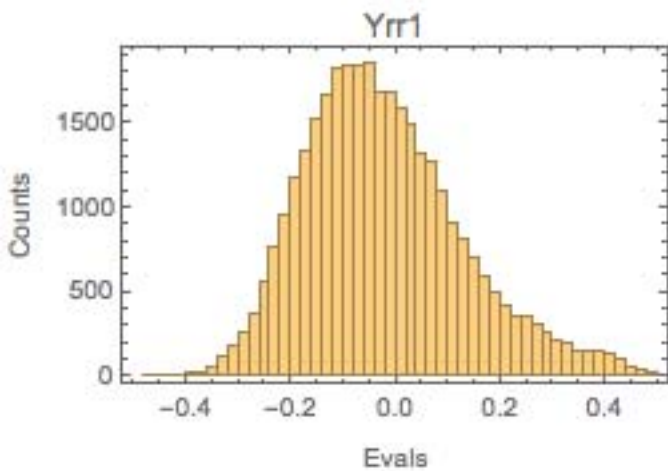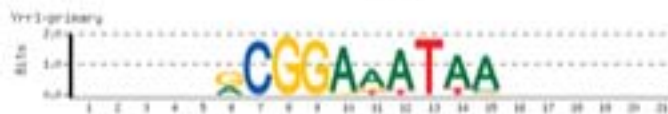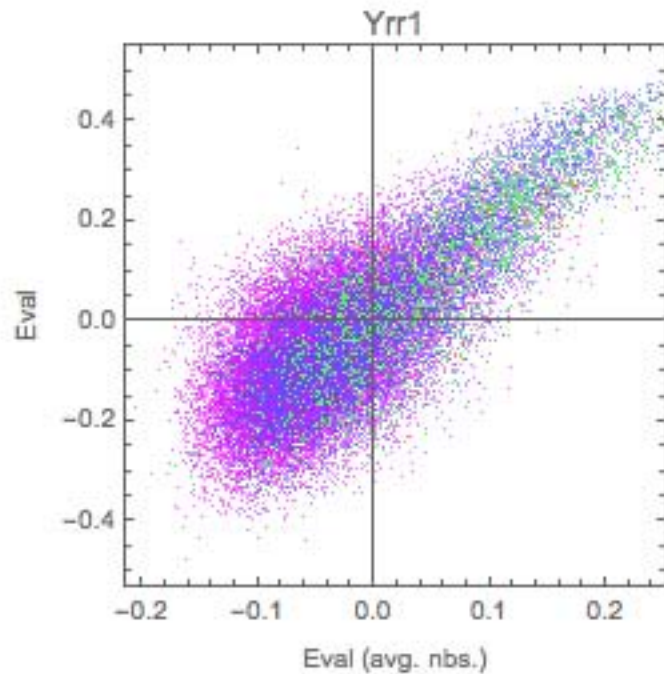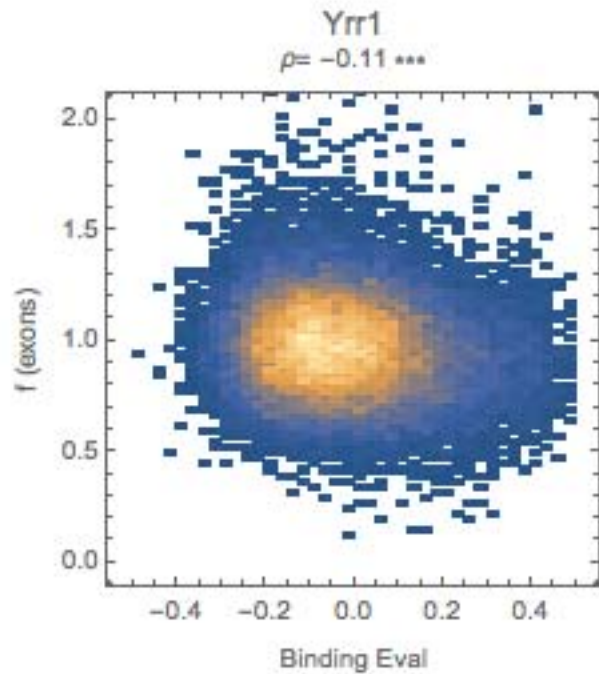

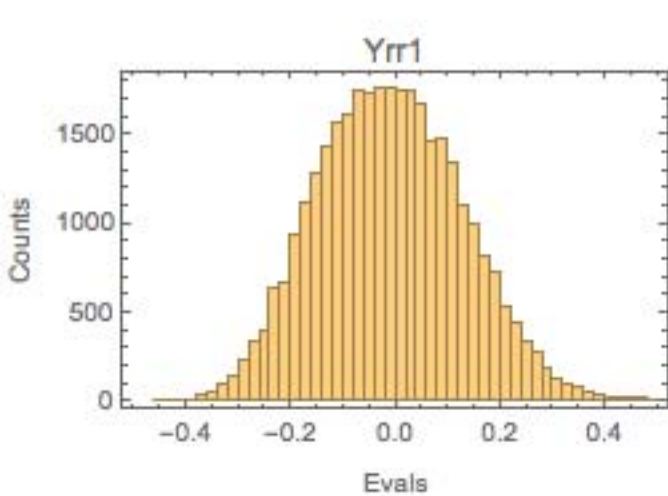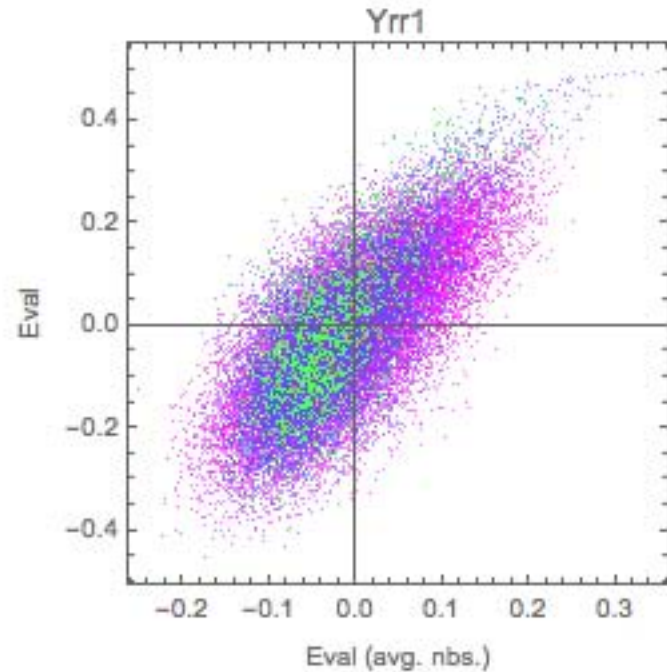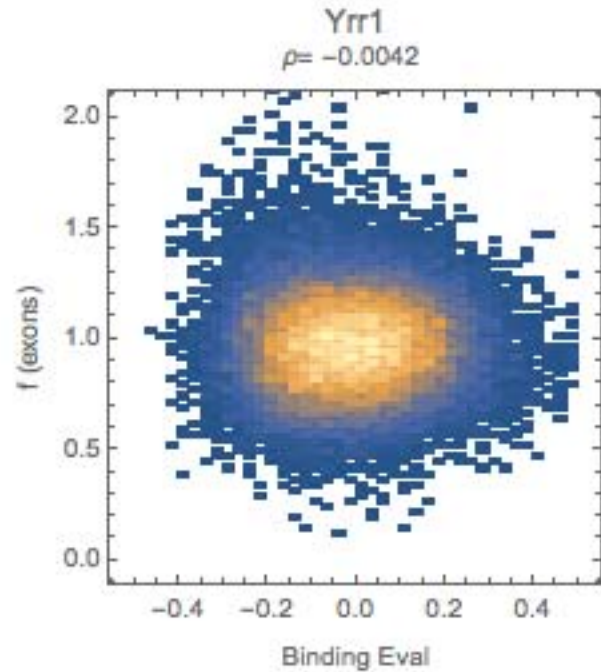

Supplement: Supplementary file [file 041145-1.pdf]
